# Supplementary material for: TREM2 regulates purinergic receptor-mediated calcium signaling and motility in human iPSC-derived microglia
Source: eLife. 2022 Feb 22;11:e73021. doi: 10.7554/eLife.73021 (PMC8906810; doi:10.7554/eLife.73021)
Supplement: Figure 1—source data 1. — In this dataset, the results of microglial stimulation with purinergic agonists and validation of Salsa6f isogenic microglia are included. [file elife-73021-fig1-data1.xlsx]

## Sheet: Fig.1B
			Figure 1B (left panel)										Figure 1B (right panel)
			Average Trace- Cytosolic Ca2+ response to 2.5mM ADP										Summary of Peak ADP Ca2+ response and Ca2+ after 5 minutes of ADP addition
		X-axis: Time (sec), Y-axis: Fluo-4/Fura-Red Ratio; SEM- Std. error of mean											Each data point is single-cell baseline subtracted Fluo-4/Fura-red ratio (baseline: avg min. Ca2+ level before ADP)
		Time (sec)		WT			TREM2 KO
				Mean	SEM		Mean	SEM					Peak Ca2+ response			Ca2+ at 5 min after ADP
													WT	TREM2 KO		WT	TREM2 KO
cells in 1(mM) Ca2+		0		0.169881	0.00492181		0.236401	0.00445678					WT_ADP_Peak-BL	KO_ADP_Peak-BL		WT_ADP_Ca5-BL	KO_ADP_Ca5-BL
		3		0.166963	0.00472535		0.232256	0.00546611
		6		0.164575	0.00468599		0.237004	0.00471188					1.36927	1.84843		0	0.922399
		9		0.165175	0.00507396		0.237025	0.00475713					0.997429	1.77267		0.115729	0.105292			Column B	KO_ADP_Peak-BL
		12		0.164095	0.00482876		0.239663	0.00502244					1.66878	1.5824		0	0.119008			vs.	vs.
		15		0.166594	0.00508878		0.239652	0.00503326					1.40647	1.81061		0.080881	0.528997			Column A	WT_ADP_Peak-BL
		18		0.167782	0.00484342		0.244946	0.00448999					1.18326	1.81561		0.155128	0.141974
		21		0.165951	0.00507781		0.235721	0.00466634					1.10167	1.65189		0.024842	0.775981			Mann Whitney test
		24		0.168895	0.00558234		0.241407	0.00564107					1.26696	1.30045		0.040548	0.520246			P value	< 0.0001
		27		0.167452	0.00489243		0.243868	0.00552302					1.56891	1.75476		0	0.362351			Exact or approximate P value?	Approximate
		30		0.168047	0.005023		0.242063	0.00528836					1.40255	1.7058		0.056363	0.099345			P value summary	****
		33		0.165717	0.00467576		0.243477	0.00841268					0.03483	1.81995		0	0.645617			Significantly different? (P < 0.05)	Yes
		36		0.166064	0.004935		0.259709	0.0216097					1.33043	2.01675		0.187084	0.4736			One- or two-tailed P value?	Two-tailed
		39		0.165221	0.00531822		0.259138	0.0177439					0.825817	1.77553		0.760541	0.759153			Sum of ranks in column A,B	42829 , 94721
		42		0.16838	0.00511293		0.251237	0.0141556					0.152896	2.05406		0.042014	0.641251			Mann-Whitney U	11454
		45		0.166645	0.00494451		0.244158	0.0106739					1.02102	1.62253		0.023857	0.734004
		48		0.166274	0.00479046		0.241583	0.00765887					1.03774	1.83709		0.351317	0.493604			Difference between medians
		51		0.167817	0.00511472		0.237136	0.00538048					0.036533	1.57034		0.517586	0.647524			Median of column A	0.7989
		54		0.163614	0.00468863		0.237452	0.0053071					1.28585	1.41271		0.474274	0.36878			Median of column B	1.319
		57		0.166458	0.00458426		0.234762	0.00495103					1.54478	1.82281		0.739868	0.149342			Difference: Actual	0.5205
		60		0.165316	0.00480819		0.236479	0.00500822					1.39577	1.55835		0.291789	0.768035			Difference: Hodges-Lehmann	0.5067
		63		0.165278	0.00474714		0.24143	0.00550912					0.94968	1.89626		0.012151	1.02954
		66		0.168047	0.00454824		0.235908	0.00520981					1.31654	1.79451		0.376332	1.12061
		69		0.167177	0.00480543		0.239927	0.00487818					1.71297	2.03073		0.874258	0.907213			Column D	KO_ADP_Ca5-BL
		72		0.16856	0.00507745		0.236946	0.00499404					1.11114	1.6855		0.093332	0.414535			vs.	vs.
		75		0.166732	0.00501744		0.239708	0.00526309					1.44638	1.77188		0.070556	0.722511			Column C	WT_ADP_Ca5-BL
		78		0.168306	0.00497558		0.237443	0.00514264					1.22485	1.7246		0.019186	0.78457
		81		0.166799	0.00460677		0.23711	0.00443459					0.596353	1.78357		0.895911	0.793284			Mann Whitney test
		84		0.169333	0.00513453		0.236651	0.00503154					1.09517	2.01496		0.037194	0.114842			P value	< 0.0001
		87		0.167611	0.00537608		0.240026	0.00505394					0.02247	1.54186		1.07408	0.157063			Exact or approximate P value?	Approximate
		90		0.167523	0.00478975		0.237103	0.00520775					1.24529	1.75501		0.668144	0.129864			P value summary	****
		93		0.170255	0.00561834		0.239672	0.0049003					0.886712	1.85153		1.16054	0.765711			Significantly different? (P < 0.05)	Yes
		96		0.169594	0.00524028		0.241212	0.00564221					1.68157	1.70706		0.507084	0.0728			One- or two-tailed P value?	Two-tailed
		99		0.169502	0.00497562		0.236408	0.00533712					1.01475	1.70969		0.970541	1.07193			Sum of ranks in column C,D	51500 , 86050
		102		0.168739	0.00483655		0.241659	0.00582855					1.3708	1.79179		0.357194	0.247111			Mann-Whitney U	20125
		105		0.166962	0.00536348		0.239819	0.00533797					1.25389	1.94021		0.795541	0.260012
		108		0.166313	0.00520255		0.241897	0.00515679					1.09172	1.68419		0.587084	0.556663			Difference between medians
		111		0.167841	0.00488574		0.235275	0.00530221					1.56405	1.7748		0.072194	0.933699			Median of column C	0.06774
		114		0.168203	0.00485083		0.236062	0.00591383					1.38594	1.98855		0.397084	0.698437			Median of column D	0.207
		117		0.16917	0.00492483		0.23853	0.00498301					1.20378	1.90393		0.277084	0.557598			Difference: Actual	0.1393
2.5mM ADP in 1Ca		120		0.171048	0.00528893		0.236462	0.00565411					1.40352	1.87112		0.222084	1.03099			Difference: Hodges-Lehmann	0.1026
		123		0.423001	0.0633563		0.248997	0.00912799					1.733	1.55584		0.437194	0.422809
		126		1.16972	0.0831395		1.90257	0.0525566					1.63682	1.20048		0.850541	0.207833
		129		1.19728	0.0648244		1.91366	0.0280611					1.05267	1.3159		0.247194	0.09909
		132		1.06163	0.0562279		1.74313	0.0264102					1.12959	1.16393		0.127194	0.072274
		135		1.05936	0.0541053		1.54824	0.0316398					1.32667	1.38141		1.08054	0.27006
		138		1.08242	0.0478995		1.34086	0.0349589					0.794954	1.21731		0.027117	0.069119
		141		1.02006	0.0609689		1.2939	0.0333348					0.651777	1.22785		0.265556	0.537005
		144		0.947955	0.0594474		1.32483	0.0359314					1.152	1.42438		0.076826	0.759328
		147		0.896829	0.0533249		1.35337	0.0312407					1.10376	1.22795		0.571304	0.194203
		150		0.872123	0.0555476		1.28407	0.030799					0.724666	1.30386		0.084387	0.062983
		153		0.831653	0.0521978		1.2611	0.0318633					1.25498	1.47125		0.434036	0.563119
		156		0.802005	0.0522008		1.2426	0.0305429					1.1098	1.31086		0.652298	0.264207
		159		0.800605	0.0582733		1.24722	0.0348652					1.02485	1.21216		0.092803	0.080008
		162		0.750412	0.0572913		1.2327	0.0352721					0.693001	1.33738		0.048863	0.145026
		165		0.715773	0.0617698		1.25371	0.0367038					0.779171	1.35011		0.13843	0.365704
		168		0.671039	0.0668446		1.23841	0.0359806					1.11086	1.3455		0.521365	0.543366
		171		0.640653	0.0682573		1.23981	0.0381598					0.779165	1.17873		0.048748	0.081721
		174		0.607368	0.0664172		1.26524	0.0404584					0.656176	1.34238		0.039771	0.235287
		177		0.607722	0.0667046		1.25358	0.0434418					0.811962	1.017		0.032357	0.037565
		180		0.593693	0.0657186		1.22102	0.0446643					1.16933	1.39346		0.217843	0.248027
		183		0.59302	0.0673005		1.21401	0.0470004					1.12356	1.26144		0.086419	0.626765
		186		0.590228	0.0670249		1.19418	0.0499193					0.615564	1.31872		0.363855	0.347047
		189		0.585691	0.0665417		1.16705	0.0477669					1.12431	1.79425		0.261617	0.137194
		192		0.58854	0.0692825		1.15824	0.0516191					0.105657	1.19213		0.091585	0.172146
		195		0.578001	0.0663921		1.18402	0.0520509					1.06921	1.30818		0.024594	0.100734
		198		0.572394	0.0674728		1.20103	0.0540076					0.722247	1.11385		0.014201	0.096391
		201		0.565151	0.0666923		1.23521	0.0527128					0.762301	1.47616		0.207088	0.155247
		204		0.564589	0.0679018		1.24074	0.0518095					1.00631	1.16962		0.415203	0.425077
		207		0.5743	0.0700375		1.2414	0.0499562					1.0139	1.27908		0.067259	0.192875
		210		0.560176	0.0671946		1.24786	0.0516316					0.916245	1.46999		0.053556	0.151745
		213		0.559121	0.0695252		1.21078	0.0497696					1.17484	1.24037		0	0.152624
		216		0.5412	0.0661744		1.18414	0.0485976					0.709118	1.63067		0.040257	0.303512
		219		0.527912	0.066355		1.19412	0.0520524					1.09011	1.31295		0.581953	0.147739
		222		0.523642	0.0645603		1.19945	0.0509673					0.063086	1.24325		0.163588	0.066305
		225		0.525045	0.0664822		1.18556	0.0520015					0.774889	1.3762		0.039085	0.051805
		228		0.522251	0.0648041		1.14321	0.0521851					0.5328	1.46675		0.03601	0.115652
		231		0.510784	0.0634716		1.12528	0.053712					0.646045	1.04779		0.022979	0.097697
		234		0.493327	0.0624714		1.10703	0.0530112					1.31323	1.46773		0.560786	0.120354
		237		0.493358	0.0617265		1.12356	0.0541321					0.643659	1.27098		0.051899	0.140315
		240		0.481549	0.0614653		1.12642	0.0568345					0.582619	1.06968		0.062893	0.387233
		243		0.482536	0.0603303		1.13462	0.0542161					0.676775	1.31531		0.062792	0.068398
		246		0.466353	0.059114		1.13325	0.05508					0.938681	1.19121		0.02955	0.140134
		249		0.468332	0.0624215		1.1517	0.0541249					0.808874	0.880326		0.363332	0.042445
		252		0.469365	0.0634183		1.15428	0.0546484					0.115132	1.31996		0.027836	0.292607
		255		0.460798	0.0619687		1.13541	0.0513758					0.673982	1.52395		0.040306	0.167182
		258		0.472118	0.06374		1.15199	0.0516429					0.762772	1.25824		0.03379	0.23412
		261		0.468342	0.0641112		1.17564	0.0498564					0.399199	1.79641		0.032992	0.356831
		264		0.463568	0.0634212		1.15531	0.0484064					0.899123	1.42863		0.377916	0.60418
		267		0.458493	0.0632406		1.1667	0.0486236					1.14702	1.15736		0.351258	0.107601
		270		0.466599	0.0640006		1.18536	0.049637					0.928274	1.30131		0.118987	0.343639
		273		0.453029	0.0653171		1.16326	0.0480089					1.13069	1.13743		0.702868	0.304233
		276		0.451377	0.065306		1.17729	0.0451339					0.96489	0.969128		0.504984	0.110715
		279		0.446661	0.0633255		1.15986	0.0418589					0.799797	1.37513		0.04049	0.112665
		282		0.439141	0.0623471		1.12564	0.0433325					1.23418	1.04206		0.830065	0.303912
		285		0.417498	0.0584988		1.14307	0.0428295					0.834666	1.47013		0.133898	0.203359
		288		0.405861	0.0547613		1.10143	0.0422923					0.633776	1.12938		0.04818	0.12669
		291		0.396481	0.0538236		1.10204	0.0426757					0.882952	1.08776		0.035431	0.129442
		294		0.409001	0.0610837		1.08294	0.0433566					1.07769	1.39369		0.086625	0.428526
		297		0.417121	0.0643638		1.05189	0.0472455					0.893718	1.2064		0.038698	0.086928
		300		0.406221	0.0616177		1.02779	0.0457656					1.0601	1.08279		0.559803	0.04419
		303		0.409003	0.0615312		1.00216	0.045168					1.06632	1.31658		0.513742	0.644181
		306		0.388825	0.0569956		0.989778	0.0465395					0.958977	1.36021		0.354219	0.446154
		309		0.372198	0.0533101		0.980146	0.0473987					1.17326	1.17677		0.07599	0.156032
		312		0.349147	0.0466836		0.960335	0.0518248					0.954834	1.08881		0.409529	0.05405
		315		0.349062	0.0473609		0.945886	0.0496031					0.051102	1.39732		0.032861	0.305272
		318		0.345686	0.0487244		0.930388	0.051907					0.634475	0.860161		0.30164	0.419767
		321		0.33889	0.047819		0.940101	0.0529367					0.533996	1.24635		0.023107	0.579314
		324		0.359808	0.0506876		0.935327	0.0546804					1.07136	1.16229		0.215651	0.053715
		327		0.387147	0.0600439		0.903004	0.0537933					1.0642	1.30276		0.341405	0.208244
		330		0.412861	0.0707344		0.890702	0.0534292					0.715142	0.872075		0.011835	0.236427
		333		0.427636	0.073316		0.884392	0.052798					1.30273	1.28678		0.523259	0.22158
		336		0.428191	0.0730311		0.905867	0.0564003					0.464897	1.1938		0.056622	0.105193
		339		0.451497	0.0764441		0.885008	0.0556419					0.528264	1.20759		0.071842	0.078941
		342		0.477389	0.0810546		0.86305	0.0536235					1.0014	1.35829		0.128296	0.153373
		345		0.503266	0.0805736		0.871924	0.0549346					0.995194	1.22112		0.127765	0.30341
		348		0.502098	0.0798971		0.869307	0.0564387					0.140112	0.914125		0.039603	0.158852
		351		0.50748	0.0777717		0.842023	0.0518001					0.478286	1.12127		0.040255	0
		354		0.520017	0.0762235		0.84179	0.0515062					0.666863	1.10402		0.346155	0.215996
		357		0.507712	0.0719623		0.84284	0.0508984					0.865132	1.25404		0.351126	0.26876
		360		0.49996	0.0696651		0.851271	0.0522627					0.987565	1.61322		0.028908	0.125255
		363		0.483878	0.0667441		0.819128	0.0515501					0.061588	1.72885		0.051489	0.195028
		366		0.474679	0.0667191		0.817902	0.0510757					1.5451	1.11392		0.623202	0.252246
		369		0.474779	0.0690143		0.812835	0.0525129					1.16126	1.30453		0.103529	0.235401
		372		0.466992	0.0673528		0.813423	0.0534123					1.2791	1.24108		0.347244	0.182184
		375		0.461564	0.0646454		0.799036	0.0512001					0.727548	1.03719		0.100442	0.171603
		378		0.460413	0.0646295		0.787085	0.052531					0.546198	1.23264		0.038084	0.313942
		381		0.454527	0.0656989		0.792103	0.0523688					0.745475	1.41798		0.03097	0.144075
		384		0.46544	0.0632318		0.772016	0.0512872					1.05143	1.44786		0.320553	0.308508
		387		0.445857	0.0626389		0.790697	0.0521828					0.799136	1.04548		0	0.280572
		390		0.438149	0.0628915		0.784358	0.051758					0.847617	1.31308		0.042696	0.511963
		393		0.435759	0.0657748		0.79349	0.049942					0.560812	1.35352		0.060362	0.069021
		396		0.427956	0.0639675		0.789064	0.0517964					0.59134	1.18342		0.221627	0
		399		0.413242	0.0609107		0.772175	0.050114					0.420166	1.17661		0.051106	0
		402		0.410401	0.0585931		0.756284	0.0517888					1.02388	1.32508		0.172312	0.740702
		405		0.420076	0.0617297		0.762761	0.0532169					1.12632	0.913525		0.657736	0.07879
		408		0.408829	0.060104		0.772107	0.054729					0.641209	1.38232		0.092185	0.32272
		411		0.410369	0.060291		0.746282	0.0529786					0.386459	1.39269		0	0.323641
		414		0.402068	0.0602755		0.757672	0.0525444					0.64434	1.1538		0.205432	0.460518
		417		0.389819	0.0567118		0.76448	0.0517224					0.376247	1.74529		0.006901	0.191726
		420		0.402957	0.059677		0.737969	0.0516995					0.606956	1.03131		0.034275	0.151432
		423		0.400959	0.0610334		0.742139	0.0517319					0.765163	1.51764		0.079088	0.34443
		426		0.391474	0.0582364		0.746917	0.052653					0.4974	1.41356		0.012659	0.150043
		429		0.393924	0.059226		0.728682	0.0506076					0.747335	1.26878		0.358533	0.139805
		432		0.391956	0.0597975		0.725943	0.0525713					0.996794	1.32861		0.26909	0.054772
		435		0.384182	0.0584643		0.70588	0.0505571					0.65332	1.60106		0.126353	0.170197
		438		0.385077	0.0606134		0.6925	0.0505939					0.705925	1.08078		0.276581	0.143232
		441		0.376586	0.0560686		0.700218	0.0507107					0.739756	1.61868		0.106997	0.243495
		444		0.378472	0.0593209		0.694189	0.0517185					0.560164	1.21324		0.035218	0.402028
		447		0.385689	0.0593137		0.686262	0.0496894					0.563537	1.34703		0.029016	0.183415
		450		0.369085	0.0561113		0.697751	0.0535932					0.46328	1.37736		0.010349	0.62657
		453		0.363584	0.0551737		0.681821	0.0527673					0.325204	1.70894		0	0.087502
		456		0.364849	0.0568049		0.67667	0.0524469					0.647047	1.1347		0.21933	0.099267
		459		0.372409	0.058737		0.667221	0.0521392					0.714709	1.04753		0.166277	0.062234
		462		0.3646	0.0577512		0.651706	0.0516082					0.620009	1.20296		0.094812	0.108144
		465		0.376988	0.0591745		0.643294	0.0515763					0.880924	1.01323		0.049115	0.120767
		468		0.373979	0.0595259		0.650406	0.0529517					0.605808	1.37135		0.135006	0.135779
		471		0.384496	0.0610986		0.64692	0.0516415					0.274353	1.27838		0.061067	0.283213
		474		0.360536	0.055127		0.643861	0.0517854					0.70471	1.1657		0.109811	0.687415
		477		0.352729	0.0539128		0.644555	0.0512724					0.748688	1.65457		0.035435	0.287498
		480		0.355616	0.056374		0.65657	0.0553616					0.7743	0.712293		0.36971	0.056251
		483		0.345467	0.0551844		0.656326	0.0543872					0.45048	1.4496		0.005668	0.159337
		486		0.351743	0.0559417		0.648236	0.0547727					0.188884	1.37455		0	0.068776
		489		0.353358	0.0589611		0.632508	0.0513646					0.475779	1.8274		0.083463	0.077004
		492		0.352643	0.0577317		0.630149	0.0533887					0.549179	1.39241		0.073668	0.157549
		495		0.353913	0.0568774		0.649474	0.0586799					0.473875	1.35261		0.044402	0.175007
		498		0.343977	0.0539306		0.629672	0.0548948					0.604216	1.02627		0.167168	0.161127
		501		0.343287	0.0529558		0.625038	0.0524061					0.846974	1.34082		0.07259	0.206218
		504		0.345638	0.0537786		0.626491	0.0513567					0.156618	1.39789		0.111255	0.237055
		507		0.330357	0.0518112		0.629807	0.0520404					0.51809	1.19087		0.049886	0.325157
		510		0.331739	0.0527848		0.648513	0.0517928					0.760867	1.14442		0.211336	0.474507
													0.798292	1.4658		0.101917	1.03883
													0.353221	1.20941		0.162559	0.848889
													0.616105	1.47466		0	0.156178
													0.888431	1.36122		0.06092	0.161094
													0.610258	1.44394		0.218625	0.340849
													0.97076	1.30838		0.01272	0.092066
													0.826208	1.20213		0.02467	0.034726
													0.500264	1.19349		0.018877	0.256584
													0.903113	1.03383		0	0.459783
													0.329511	1.04932		0.029617	0.072354
													0.596842	1.17351		0.068229	0.136163
													0.793391	1.11604		0.088041	0.121396
													0.728458	1.41352		0.376769	0.106587
													0.558653	1.03712		0.132595	0.040063
													1.08228	1.03033		0.415866	0
													1.04871	0.487023		0.060192	0.099234
													0.380545	0.389281		0.182399	0.148192
													0.419806	0.788858		0.058188	0.437226
													0.722906	0.629904		0	0.259357
													0.901008	0.803037		0.175383	0.248158
													0.82099	0.977964		0.010768	0.413148
													1.86256	0.970739		0.685848	0.180004
													0.65809	0.976847		0.031069	0.236216
													1.39997	0.861135		0.405983	0.411502
													0.138859	1.04076		0.011833	0.434925
													1.84046	0.702675		1.57893	0.621709
													0.755111	0.698162		0	0.302776
													1.04062	0.854221		0.044224	0.224624
													1.16248	0.881465		0.045461	0.184289
													1.45236	0.624155		0.102403	0.131934
													1.607	0.526503		0.782138	0.272148
													0.959193	1.05602		0.371448	0.145653
													1.24446	1.04322		0.251933	0.51176
													1.06791	1.12274		0.176392	0.470426
													0.8948	0.979936		0.009992	0.317293
													0.921416	0.378019		0.020169	0.023088
													1.94084	0.867497		0.088405	0.466013
													1.39867	0.463229		0.23488	0.152871
													1.32093	0.943521		0	0.535621
													0.047176	1.06522		0.023013	0.369614
													1.22587	0.812843		0.621614	0.409646
													0.05358	0.774237		0.003901	0.37643
													0.078476	0.916909		0.021605	0.154466
													1.08905	0.783391		0.049012	0.291938
													0.05481	1.03088		0.01664	0.276658
													0.976389	0.714422		0.021212	0.338158
													0.303632	0.491804		0	0.136785
													0.034816	1.06299		0.013807	0.05521
													0.306474	0.617571		0.005628	0.127696
													0.509866	0.853224		0.012512	0.338362
													1.11809	0.577236		0.016609	0.265581
													1.15878	1.55681		0.008288	0.165351
													0.048226	1.67975		0.028536	0.123919
													0.05525	1.45491		0.015882	0.279564
													0.395593	1.11631		0.023965	0.087299
													1.03836	1.46473		0.010526	0.076488
													0.069312	1.27748		0.032446	0.157071
													0.621033	1.42763		0.00238	0.194585
													0.540242	1.66701		0.017006	0.166746
													0.766736	1.67591		0.026706	0.372153
													0.119338	1.49487		0	0.151682
													0.959128	1.08292		0.198928	0.385645
													0.082866	1.58853		0.000342	0.071103
													0.76502	1.3831		0.049241	0.493675
													0.753791	1.59769		0.018726	0.084896
													0.059253	1.37153		0.014133	0.691282
													0.922157	1.30282		0.338412	0.07728
													0.031197	1.57887		0.014847	0.461781
													0.448613	1.82		0.017245	0.379269
													1.03137	1.30312		0	0.084727
													0.047575	1.25714		0.036837	0.153983
													0.798595	1.46228		0.006912	0.155026
													0.965748	1.8534		0.039169	0.052783
													0.057273	1.17427		0.008352	0.581116
													0.036502	1.42062		0.020269	0.340626
													0.744453	1.33304		0.033708	0.209471
													0.74003	1.41222		0.006943	0.237845
													0.447315	1.45301		0.013652	0.323518
													0.056487	1.52358		0.013064	0.408555
													0.710444	1.75206		0.007269	0.221705
													0.742059	1.42209		0.026038	0.500481
														1.65948			0.246245
														1.68511			0.302802
														1.69342			0.098865
														1.18372			0.130165
														1.38809			0.09221
														1.20572			0.413987
														1.5719			0.111073
														1.49816			0.375723
														1.35456			0.334571
														1.55665			0.076064
														1.60725			0.170623
														1.89339			0.13422
														1.93713			0.138257
														0.929495			0.021399
														1.66973			0.296864
														1.63829			0.114149
														1.36686			0.0534
														1.47659			0.236247
														1.40415			0.175857
														1.23139			0.061944
														1.52745			0.064032
														1.18699			0.134011
														1.79187			0.132644
														1.4214			0.591276

## Sheet: Fig.1D
			Figure 1D (left panel)									Figure 1D (right panel)
			Average Trace- Cytosolic Ca2+ response to 2.5mM ADP									Summary of Peak ADP Ca2+ response and Ca2+ after 5 minutes of ADP addition
		X-axis: Time (sec), Y-axis: G/R Ratio (salsa6f); SEM- Std. error of mean										Each data point is single-cell baseline subtracted G/R ratio (baseline: avg min. Ca2+ level before ADP)
		Time (sec)		WT			TREM2 KO
				Mean	SEM		Mean	SEM				Peak Ca2+ response			Ca2+ at 5 min after ADP
												WT	TREM2 KO		WT	TREM2 KO
	cells in 1(mM) Ca2+	0		0.349126	0.010288		0.37045	0.005412				WT_ADP_Peak-BL	KO_ADP_Peak-BL		WT_ADP_Ca5-BL	KO_ADP_ca5-BL
		2		0.3488	0.009572		0.369801	0.005121
		4		0.349978	0.010044		0.369876	0.00529				3.25371	3.00484		0.488004	2.43402			Column B	KO_ADP_Peak-BL
		6		0.352255	0.009726		0.368911	0.00537				3.00888	2.24393		0.237666	1.00008			vs.	vs.
		8		0.355165	0.010533		0.368239	0.005396				2.47408	2.82158		0.226466	0.060035			Column A	WT_ADP_Peak-BL
		10		0.355289	0.010055		0.369634	0.005293				2.55586	2.42333		0.10676	0.578967
		12		0.353491	0.009867		0.369427	0.005352				2.20588	2.53289		0.138658	0.736355			Mann Whitney test
		14		0.350382	0.009435		0.369841	0.005602				2.56066	2.17728		0.153773	1.8678			P value	< 0.0001
		16		0.352523	0.01005		0.369905	0.00586				2.28261	3.24855		0.221872	0.975772			Exact or approximate P value?	Exact
		18		0.354115	0.011274		0.371577	0.006083				2.80965	3.18915		0.100872	0.569596			P value summary	****
		20		0.351995	0.010788		0.371133	0.005939				1.93157	2.39184		0.102554	0.357841			Significantly different? (P < 0.05)	Yes
		22		0.350816	0.010432		0.370008	0.005653				1.55134	2.61478		0.146628	1.54697			One- or two-tailed P value?	Two-tailed
		24		0.352342	0.010222		0.369065	0.005553				2.1778	2.26479		0.169156	1.2092			Sum of ranks in column A,B	4545 , 9651
		26		0.356258	0.010865		0.36997	0.005512				3.73331	2.36703		0.213742	0.080777			Mann-Whitney U	1989
		28		0.356529	0.010642		0.366368	0.005548				3.51492	2.97062		0.400789	1.31325
		30		0.355876	0.010705		0.364429	0.005262				1.74807	2.56945		0	0.741918			Difference between medians
		32		0.354318	0.010466		0.361041	0.005241				2.99973	3.10369		0.094683	0.829741			Median of column A	2.465
		34		0.352233	0.010963		0.362686	0.005201				1.81513	2.3189		0.104866	1.09999			Median of column B	2.839
		36		0.351281	0.011118		0.361953	0.005528				2.63227	2.3202		0.204215	0.643703			Difference: Actual	0.3735
		38		0.349833	0.010132		0.362196	0.005541				2.7057	2.45076		0.084558	1.41703			Difference: Hodges-Lehmann	0.435
		40		0.351876	0.01044		0.362425	0.00573				2.3466	2.64865		0.146819	0.215707
		42		0.354365	0.010905		0.362759	0.005398				3.43113	2.59475		0.319032	0.95037
		44		0.352249	0.011887		0.363324	0.005539				2.58229	2.93634		0.099747	1.33778			Column D	KO_ADP_ca5-BL
		46		0.352213	0.012335		0.361833	0.005533				2.78673	3.35315		0.143709	0.529931			vs.	vs.
		48		0.348731	0.012379		0.361346	0.005705				3.2613	3.0671		0.271849	1.19815			Column C	WT_ADP_Ca5-BL
		50		0.352083	0.012802		0.359621	0.005508				2.46506	2.43404		0.11492	1.39311
		52		0.346564	0.012322		0.359137	0.005357				1.41596	2.92879		0.062583	0.19875			Mann Whitney test
		54		0.343648	0.011082		0.358318	0.005415				0.038833	2.70651		0.044368	1.56997			P value	< 0.0001
		56		0.337222	0.009805		0.358336	0.005289				2.08875	3.1542		0.203373	0.142393			Exact or approximate P value?	Exact
		58		0.334494	0.008426		0.357631	0.005433				1.76466	3.59502		0.06981	0.555002			P value summary	****
		60		0.335651	0.009015		0.354646	0.005416				2.71272	3.20507		0.16441	0.90237			Significantly different? (P < 0.05)	Yes
		62		0.338659	0.008726		0.352831	0.005401				2.37756	3.32525		0.594141	0.694072			One- or two-tailed P value?	Two-tailed
		64		0.340235	0.009421		0.351076	0.005386				3.91029	2.90225		0.20533	1.14148			Sum of ranks in column C,D	3460 , 10736
		66		0.341441	0.009078		0.351713	0.005306				3.34736	3.17377		0.097727	0.554259			Mann-Whitney U	904
		68		0.339953	0.008932		0.351091	0.00554				2.05717	3.24569		0.143124	0.49827
		70		0.342093	0.009299		0.350922	0.005268				1.53244	3.38494		0.150654	0.974745			Difference between medians
		72		0.340184	0.009643		0.352262	0.005279				3.42791	3.41098		0.565018	0.764106			Median of column C	0.1328
		74		0.340681	0.009422		0.352447	0.005281				0.754303	3.78364		0.09421	0.718301			Median of column D	0.6727
		76		0.340492	0.009684		0.352687	0.005426				2.36967	3.25656		0.149328	0.969708			Difference: Actual	0.54
		78		0.339977	0.009307		0.35084	0.005416				2.46033	2.90065		0.043342	1.32223			Difference: Hodges-Lehmann	0.5145
		80		0.341309	0.009545		0.350407	0.00553				2.44315	3.18799		0.07396	0.397373
		82		0.342382	0.009275		0.350061	0.005527				2.4657	2.93401		0.1263	0.800212
		84		0.340171	0.009196		0.35057	0.005627				2.51096	2.66289		0	1.55096
		86		0.334093	0.00842		0.35088	0.005459				1.85829	2.74161		0.310259	0.702062
		88		0.3311	0.008243		0.352994	0.005642				2.2753	3.01962		0.288749	0.612052
		90		0.331897	0.008538		0.351906	0.005587				2.03021	3.1653		0.038313	0.674608
		92		0.33491	0.008963		0.350732	0.00534				1.55263	3.08029		0	1.02668
		94		0.336761	0.008851		0.348973	0.005127				2.83045	2.55698		0.000687	0.270606
		96		0.341895	0.009746		0.350749	0.005019				1.61318	2.87454		0.097269	1.16907
		98		0.348213	0.013767		0.355663	0.005704				2.0105	2.40347		0.240802	0.133139
	2.5mM ADP in 1Ca	100		0.354089	0.01643		0.363393	0.015665				1.43741	2.83853		0	0.162917
		102		0.35622	0.015201		0.373749	0.028074				2.67977	2.75552		0.117799	0.165508
		104		0.376688	0.017065		0.403476	0.040239				3.12308	1.79731		0.034734	0.285715
		106		0.905204	0.078997		1.34855	0.052376				1.77263	2.83856		0.027101	0.10696
		108		1.65178	0.132096		2.25129	0.060457				2.04484	2.8261		0	0.900766
		110		2.41815	0.169418		3.06643	0.06785				1.74772	3.43908		0.253949	0.288587
		112		2.60179	0.155818		2.87788	0.055792				1.69546	2.56964		0.239689	0.513446
		114		2.38838	0.12593		2.55704	0.057636				3.04844	2.40106		0.132757	0.804785
		116		2.11515	0.108036		2.24976	0.057904				0.808409	2.83276		0	0.640616
		118		1.92342	0.096868		2.04677	0.053742				2.7254	2.73975		0.00384	1.67132
		120		1.84585	0.091853		1.92317	0.046964				3.0969	2.66122		0.298999	0.987285
		122		1.76	0.085144		1.87412	0.041796				2.78776	2.50533		0.065696	0.471579
		124		1.63181	0.077135		1.87377	0.042958				3.01849	2.67043		0.224189	0.850064
		126		1.54562	0.080943		1.93026	0.050071				2.41647	3.27183		0.05092	1.74503
		128		1.46909	0.0891		2.00501	0.055898				3.32606	3.39041		0.615495	1.97395
		130		1.43842	0.099841		2.08726	0.060519				2.64916	2.54763		0	0.53567
		132		1.396	0.112336		2.16171	0.064111				1.81312	2.6801		0.048973	0.369325
		134		1.37088	0.11803		2.22555	0.066469				2.47578	2.73651		0.038281	1.10199
		136		1.33553	0.124519		2.26783	0.069246				2.89271	2.99088		0.326313	0.088612
		138		1.30572	0.127993		2.29018	0.072773				3.01223	3.15477		0.228228	0.164386
		140		1.25686	0.127845		2.28869	0.076299				1.80836	2.72431		0.132152	0.114317
		142		1.21417	0.127643		2.28896	0.079059				1.76624	2.67199		0.354048	0.900007
		144		1.1752	0.125058		2.2845	0.082321				2.66561	2.60226		0.575808	0.579598
		146		1.16431	0.127422		2.26747	0.084762					2.20138			0.102014
		148		1.13636	0.125316		2.25968	0.088948					3.02577			1.61275
		150		1.11275	0.123506		2.25432	0.092062					3.04273			0.439866
		152		1.08776	0.119527		2.25588	0.094532					3.20195			1.8699
		154		1.06089	0.116768		2.24527	0.096091					3.08599			0.628598
		156		1.04225	0.115346		2.22138	0.09714					2.35416			0.072178
		158		1.02623	0.114925		2.18934	0.099526					2.57052			0.041639
		160		1.01164	0.113914		2.14697	0.101837					2.7762			0.71939
		162		0.983951	0.110799		2.11332	0.104629					2.02787			0.101101
		164		0.953139	0.105807		2.08245	0.105715					3.02653			0.586117
		166		0.928151	0.103291		2.05247	0.105791					2.6205			0.206578
		168		0.907311	0.099874		2.02336	0.105205					2.5239			0.067944
		170		0.882811	0.097807		1.99916	0.105707					2.90487			0.748118
		172		0.868105	0.095685		1.96717	0.105961					3.17153			0.181733
		174		0.846359	0.093499		1.94461	0.106387					3.74504			0.615627
		176		0.83366	0.092136		1.91824	0.106688					2.59483			0.791724
		178		0.811007	0.088306		1.90457	0.10838					3.13032			0.198532
		180		0.807374	0.088701		1.88652	0.10968					2.83649			0.419723
		182		0.793529	0.086374		1.88207	0.110719					2.55942			1.27352
		184		0.797909	0.087566		1.89512	0.111433					3.41332			1.43165
		186		0.800854	0.087476		1.90732	0.109586					2.75484			0.672712
		188		0.807903	0.087901		1.93469	0.107278					3.16998			0.142398
		190		0.80404	0.085918		1.96184	0.104807					2.84887			1.09953
		192		0.797745	0.084984		2.00467	0.104349					3.37536			0.567989
		194		0.788181	0.083932		2.05302	0.104005					2.86722			0.286581
		196		0.782507	0.08457		2.10551	0.104689					3.26805			0.524449
		198		0.784376	0.084888		2.15835	0.103805
		200		0.78504	0.08565		2.20393	0.100282
		202		0.780158	0.08511		2.24312	0.093311
		204		0.772863	0.084944		2.29886	0.087648
		206		0.769365	0.083333		2.33918	0.082193
		208		0.765516	0.081203		2.38265	0.077791
		210		0.77498	0.081271		2.37392	0.073075
		212		0.770177	0.07934		2.3803	0.070865
		214		0.75955	0.077509		2.37016	0.072423
		216		0.750445	0.076325		2.3794	0.073605
		218		0.75375	0.078774		2.37682	0.070649
		220		0.761447	0.079702		2.35027	0.069468
		222		0.750979	0.077141		2.32478	0.068135
		224		0.744371	0.071876		2.29591	0.071133
		226		0.736325	0.068709		2.29153	0.072857
		228		0.732382	0.065094		2.27262	0.07497
		230		0.743689	0.065607		2.24983	0.076695
		232		0.764942	0.067397		2.21116	0.07672
		234		0.769194	0.067471		2.19868	0.078542
		236		0.757525	0.066532		2.156	0.080818
		238		0.756556	0.066456		2.12778	0.083013
		240		0.765549	0.067584		2.0855	0.086942
		242		0.767182	0.069471		2.0607	0.090833
		244		0.763269	0.069046		2.01857	0.092346
		246		0.750737	0.06905		1.95938	0.09622
		248		0.74983	0.068173		1.90972	0.100488
		250		0.75023	0.067506		1.87672	0.10666
		252		0.73155	0.065114		1.84728	0.109191
		254		0.709832	0.061476		1.79459	0.110826
		256		0.667884	0.056748		1.74109	0.111269
		258		0.6336	0.051723		1.67467	0.11171
		260		0.609109	0.048518		1.62262	0.113014
		262		0.599877	0.046071		1.56845	0.112326
		264		0.579678	0.042793		1.51821	0.110467
		266		0.558756	0.037648		1.47522	0.109303
		268		0.529597	0.032832		1.43325	0.109081
		270		0.517379	0.031301		1.40502	0.107854
		272		0.51016	0.033082		1.37887	0.105961
		274		0.502708	0.031118		1.3452	0.103732
		276		0.500147	0.032199		1.30161	0.10138
		278		0.4881	0.028372		1.26552	0.099817
		280		0.475363	0.024819		1.24645	0.098455
		282		0.484118	0.027293		1.22716	0.097355
		284		0.484342	0.027034		1.19927	0.09418
		286		0.48224	0.028437		1.16387	0.091629
		288		0.470302	0.024484		1.13978	0.088398
		290		0.471984	0.025778		1.11269	0.086165
		292		0.474065	0.027817		1.0953	0.084404
		294		0.467549	0.023439		1.08366	0.083376
		296		0.466473	0.020273		1.08174	0.083999
		298		0.474942	0.020439		1.07129	0.082895
		300		0.46546	0.015741		0.977433	0.072731
		302		0.468868	0.016295		0.97315	0.073281
		304		0.465829	0.014141		0.981946	0.075076
		306		0.463384	0.013257		0.987553	0.075494
		308		0.458173	0.011165		0.988169	0.073248
		310		0.462007	0.012794		1.00023	0.070507
		312		0.461253	0.0137		1.01779	0.070024
		314		0.462956	0.015015		1.03152	0.069988
		316		0.458155	0.013006		1.04503	0.070645
		318		0.464399	0.011887		1.04798	0.068886
		320		0.483286	0.017547		1.06316	0.067782
		322		0.48999	0.020983		1.07664	0.065673
		324		0.492496	0.022696		1.09777	0.063787
		326		0.491137	0.018499		1.11207	0.063832
		328		0.504768	0.024189		1.11785	0.063902
		330		0.516689	0.029939		1.11965	0.06381
		332		0.512789	0.026842		1.10767	0.062404
		334		0.504299	0.02152		1.09076	0.062425
		336		0.506979	0.020297		1.07554	0.06489
		338		0.510684	0.021315		1.07553	0.066831
		340		0.511694	0.022145		1.0915	0.068734
		342		0.525299	0.020786		1.10408	0.071379
		344		0.538779	0.023915		1.11366	0.073479
		346		0.569186	0.032372		1.11347	0.074721
		348		0.577735	0.032998		1.11562	0.075257
		350		0.579112	0.0329		1.11778	0.07593
		352		0.576384	0.031767		1.11235	0.074364
		354		0.581069	0.027326		1.10688	0.073733
		356		0.600171	0.026789		1.10655	0.073757
		358		0.59622	0.025749		1.10649	0.07383
		360		0.580604	0.024139		1.10631	0.073901
		362		0.559953	0.020472		1.08923	0.072729
		364		0.562239	0.020467		1.07958	0.072429
		366		0.566998	0.020658		1.06996	0.071924
		368		0.582138	0.024008		1.06929	0.070372
		370		0.603257	0.025635		1.06154	0.069813
		372		0.628435	0.028756		1.05512	0.06958
		374		0.640563	0.030195		1.05469	0.070461
		376		0.65274	0.028607		1.06154	0.071181
		378		0.643449	0.027036		1.0711	0.072098
		380		0.635823	0.03013		1.07621	0.072383
		382		0.608188	0.029154		1.08043	0.071317
		384		0.601874	0.028357		1.09405	0.069301
		386		0.596169	0.028337		1.10777	0.067049
		388		0.586722	0.025545		1.10977	0.067883
		390		0.570991	0.024131		1.10717	0.069011
		392		0.55067	0.021141		1.11502	0.068964
		394		0.541504	0.020129		1.14167	0.069315
		396		0.533903	0.02015		1.15135	0.069261
		398		0.534014	0.02163		1.14967	0.069034
		400		0.529606	0.02014		1.15288	0.068843
		402		0.523887	0.021434		1.16913	0.069415
		404		0.516813	0.020304		1.18378	0.071294
		406		0.516813	0.02181		1.21087	0.07042
		408		0.518828	0.021988		1.24714	0.072048
		410		0.521985	0.02317		1.28048	0.073814
		412		0.529625	0.02178		1.28265	0.076634
		414		0.533561	0.021916		1.27405	0.075546
		416		0.548927	0.024512		1.27112	0.075983
		418		0.548289	0.026215		1.28188	0.074821
		420		0.554614	0.026843		1.29226	0.077303
		422		0.557909	0.027267		1.30958	0.078179
		424		0.563633	0.024478		1.30605	0.079529
		426		0.567236	0.027184		1.32085	0.080155
		428		0.559266	0.024741		1.33524	0.079945
		430		0.559316	0.025574		1.3645	0.082598
		432		0.55299	0.026813		1.36811	0.083145
		434		0.548133	0.028028		1.37763	0.085806
		436		0.541279	0.020267		1.38579	0.087673
		438		0.538794	0.018941		1.40459	0.088712
		440		0.547549	0.020718		1.4201	0.087668
		442		0.551559	0.022698		1.42717	0.087786
		444		0.550726	0.022485		1.41432	0.088232
		446		0.53108	0.018646		1.39772	0.091128
		448		0.521181	0.017384		1.37905	0.091599
		450		0.517938	0.017806		1.39253	0.092531
		452		0.51979	0.017844		1.39668	0.092824
		454		0.514444	0.017506		1.40326	0.094507
		456		0.521633	0.018373		1.40676	0.095916
		458		0.522039	0.019813		1.42127	0.096891
		460		0.527419	0.023571		1.41385	0.097048
		462		0.519052	0.019185		1.41282	0.097929
		464		0.521011	0.022523		1.41153	0.097815
		466		0.52617	0.021444		1.41704	0.096812
		468		0.534856	0.025647		1.43718	0.095533
		470		0.543155	0.029372		1.44822	0.095171
		472		0.535217	0.025208		1.45127	0.094136
		474		0.519347	0.021577		1.44907	0.09319
		476		0.507986	0.017535		1.46726	0.094294
		478		0.503607	0.016546		1.48544	0.094635
		480		0.499213	0.016151		1.46899	0.096068
		482		0.481939	0.013382		1.47063	0.09636
		484		0.491816	0.01727		1.44202	0.096647
		486		0.492173	0.020345		1.45268	0.095662
		488		0.501782	0.026257		1.42467	0.096248
		490		0.48585	0.018742		1.42844	0.096218
		492		0.491808	0.020993		1.41838	0.097268
		494		0.484915	0.016464		1.42532	0.096748
		496		0.493981	0.017294		1.41998	0.097192
		498		0.499915	0.016651		1.41664	0.095414
		500		0.533829	0.027736		1.31591	0.09138

## Sheet: Fig.1E
			Figure 1E (left panel)										Figure 1E (right panel)
			Average Trace- Cytosolic Ca2+ response to 2.5mM ATP										Summary of Peak ADP Ca2+ response and Ca2+ after 5 minutes of ATP addition
		X-axis: Time (sec), Y-axis: Fluo-4/Fura-Red Ratio; SEM- Std. error of mean											Each data point is single-cell baseline subtracted Fluo-4/Fura-red ratio (Baseline: Avg. min Calcium level before ATP addition)
		Time (sec)		WT			TREM2 KO
				Mean	SEM		Mean	SEM					Peak Ca2+ response			Ca2+ at 5 min after ADP
													WT	TREM2 KO		WT	TREM2 KO
cells in 1(mM) Ca2+		0		0.179562	0.00386111		0.230976	0.00493344					WT_ATP_Peak-BL	KO_ATP_Peak-BL		WT_ATP_Ca5-BL	KO_ATP_Ca5-BL
		3		0.182011	0.00431805		0.228346	0.00439905												Column B	KO_ATP_Peak-BL
		6		0.179069	0.00341072		0.230999	0.00481577					0.948417	0.800703		0	0.25272			vs.	vs.
		9		0.179826	0.00369105		0.227046	0.00416019					0.940071	0.736597		0	0			Column A	WT_ATP_Peak-BL
		12		0.182541	0.0035407		0.23025	0.00478542					1.1145	0.857663		0	0.243697
		15		0.180703	0.00345468		0.230812	0.00434164					0.990772	1.06841		0.116042	0.0611574			Mann Whitney test
		18		0.176532	0.00350176		0.229172	0.00476962					0.632062	1.06644		0.00609556	0.0275303			P value	< 0.0001
		21		0.1817	0.0041411		0.231124	0.00458455					1.14389	0.95366		0	0.0908311			Exact or approximate P value?	Approximate
		24		0.1829	0.00380422		0.234748	0.00453669					0.712711	1.1481		0.017987	0.0562683			P value summary	****
		27		0.18142	0.00380343		0.229613	0.00492145					1.24208	0.581826		0.00148643	0.0188569			Significantly different? (P < 0.05)	Yes
		30		0.176592	0.0033976		0.232267	0.00451038					0.859383	0.741517		0.134359	0.174466			One- or two-tailed P value?	Two-tailed
		33		0.18424	0.0041098		0.231374	0.00399608					1.0419	0.97828		0.242977	0.104169			Sum of ranks in column A,B	21508 , 37832
		36		0.180711	0.00402123		0.230669	0.00443697					1.49705	0.77313		0.390222	0.152434			Mann-Whitney U	5398
		39		0.179236	0.00345082		0.23298	0.00530519					0.935013	1.05177		0.0240395	0.28083
		42		0.178628	0.00354994		0.234677	0.00494903					1.06739	0.998071		0.024319	0.209275			Difference between medians
		45		0.183681	0.00367439		0.234456	0.00491796					0.496833	0.724417		0.00708277	0			Median of column A	0.935
		48		0.179098	0.00334874		0.234496	0.00485919					0.578852	0.231943		0	0.0743278			Median of column B	1.574
		51		0.178132	0.0032788		0.230896	0.00458681					0.4811	0.8846		0	0.120938			Difference: Actual	0.639
		54		0.180583	0.00380068		0.234783	0.00456143					0.888985	0.727982		0.0908831	0.14305			Difference: Hodges-Lehmann	0.5804
		57		0.186253	0.00403644		0.235562	0.00531364					1.24439	1.1261		0	0.261495
1Ca 2.5mM ATP		60		0.189934	0.00344433		0.235329	0.00458636					1.14375	0.81741		0	0.106826
		63		0.228909	0.020099		0.360538	0.0275618					1.05425	0.792649		0.160258	0.0340519			Column D	KO_ATP_Ca5-BL
		66		0.488391	0.0644317		1.83787	0.0373298					1.0486	0.892531		0.246762	0.320135			vs.	vs.
		69		0.649015	0.0673102		1.73716	0.0244996					0.978126	1.30414		0.0650728	0.457233			Column C	WT_ATP_Ca5-BL
		72		0.606843	0.0544256		1.61371	0.026878					0.515723	0.662543		0.0103188	0.116662
		75		0.668712	0.0584379		1.44495	0.02551					0.672507	0.56346		0	0.345927			Mann Whitney test
		78		0.800824	0.065828		1.32616	0.0248193					1.06359	0.524866		0.27379	0.0624892			P value	< 0.0001
		81		0.822147	0.0628039		1.33271	0.0242634					0.814326	0.555962		0.102805	0.0760883			Exact or approximate P value?	Approximate
		84		0.834896	0.0589524		1.3187	0.0237576					1.16398	0.779967		0.520764	0.0243977			P value summary	****
		87		0.762304	0.0512577		1.2004	0.0239476					1.29489	0.637249		0.0669922	0			Significantly different? (P < 0.05)	Yes
		90		0.694624	0.0458504		1.11133	0.0268039					0.979831	0.618773		0.0359914	0.295857			One- or two-tailed P value?	Two-tailed
		93		0.623093	0.0411003		1.05309	0.0258637					1.23689	1.36925		0.0680023	0.41615			Sum of ranks in column C,D	25240 , 34101
		96		0.590234	0.0411224		1.03477	0.0321586					1.03603	1.08049		0.0686942	0.138984			Mann-Whitney U	9130
		99		0.553384	0.0409224		0.949887	0.0313235					0.905584	1.15494		0.047407	0.0767654
		102		0.535928	0.0410658		0.882775	0.032346					1.01301	0.880029		0	0.314109			Difference between medians
		105		0.502104	0.039856		0.849882	0.0339181					0.666648	0.732018		0.0579396	0.129406			Median of column C	0.03731
		108		0.459663	0.0369402		0.782304	0.0343723					0.358791	1.04326		0	0.0528778			Median of column D	0.08648
		111		0.436915	0.0363632		0.684665	0.0347833					1.00777	1.02855		0.0258699	0.122635			Difference: Actual	0.04917
		114		0.421777	0.0359093		0.598416	0.0339084					1.07963	1.0372		0.0653259	0.0623955			Difference: Hodges-Lehmann	0.03798
		117		0.399028	0.0351197		0.543498	0.0326903					0.506343	0.789516		0.00470563	0.0535446
		120		0.386276	0.0346989		0.501633	0.0319168					0.649171	0.617987		0.0833729	0
		123		0.365269	0.0328757		0.481705	0.0306364					0.753935	0.809408		0.0207359	0.0938581
		126		0.356488	0.0329022		0.462863	0.0310451					1.07511	0.789324		0.427327	0.0113289
		129		0.345609	0.0314888		0.437182	0.0290479					0.802314	0.79032		0.0413643	0.0628119
		132		0.335277	0.0310946		0.429204	0.0294809					0.992862	0.913396		0	0.20326
		135		0.328987	0.0302094		0.423513	0.0291905					0.669043	0.672476		0	0.0327401
		138		0.319856	0.0299264		0.418263	0.0294763					1.29654	0.886416		0.246554	0.0624043
		141		0.313073	0.0289279		0.418712	0.0286093					0.723768	0.927235		0.224082	0
		144		0.304724	0.0274283		0.405138	0.0280822					1.12315	0.670557		0	0.00896624
		147		0.302596	0.0269515		0.406776	0.0275544					0.796638	0.840416		0.0236925	0.341617
		150		0.299184	0.0262009		0.405046	0.0270345					1.13843	1.61366		0.32881	0.219951
		153		0.298971	0.0260145		0.402698	0.0273288					0.871313	1.91294		0.827639	0.179166
		156		0.299348	0.0261683		0.398045	0.0266132					1.05398	1.88719		0.0227966	0.12724
		159		0.297876	0.0262849		0.405359	0.0259278					0.897222	1.59373		0.0114731	0.0655596
		162		0.294144	0.0249474		0.400126	0.0273664					0.852234	1.65183		0.204845	0.0336243
		165		0.288892	0.025135		0.40643	0.0266326					1.41463	1.35106		0.585713	0.0502494
		168		0.290469	0.024901		0.39893	0.0257618					0.990983	1.71884		0.185602	0.59779
		171		0.294501	0.0243476		0.405134	0.0255115					1.01648	1.67957		0.447497	0.0280924
		174		0.287839	0.0234078		0.395347	0.0248701					1.06914	1.60232		0.396849	0.255516
		177		0.284747	0.0227295		0.397186	0.0239397					1.64977	1.75598		0	0.208917
		180		0.286288	0.0225043		0.393956	0.0238511					0.992728	1.74653		0.0939494	0.0660584
		183		0.28924	0.023309		0.389304	0.0230254					0.933001	1.55281		0	0.0835478
		186		0.287256	0.0236242		0.386939	0.0228012					1.22475	1.65583		0.540363	0.0367916
		189		0.278955	0.0220134		0.386542	0.0224679					1.10355	1.96867		0	0.0938078
		192		0.274145	0.0208357		0.383836	0.0209694					1.04058	1.69601		0.0389123	0.116238
		195		0.269389	0.0198491		0.38002	0.0211461					0.625267	1.5961		0.0373054	0.0692919
		198		0.270158	0.019577		0.386473	0.022283					1.31386	1.92565		0.107325	0.111187
		201		0.267036	0.0192654		0.38577	0.0215434					1.21679	1.71039		0.0789891	0.112573
		204		0.262107	0.0183131		0.384677	0.0210116					1.56581	1.80884		0.195243	0.063544
		207		0.265466	0.0182841		0.379236	0.0217894					1.40049	1.70166		0.246472	0.104308
		210		0.26031	0.0193344		0.380155	0.0213224					1.06342	1.877		0.0143629	0.144994
		213		0.261965	0.0179604		0.379341	0.0211983					1.10303	1.76188		0.0355921	0.104881
		216		0.258823	0.0168219		0.379257	0.0224207					0.129919	1.80143		0.0216385	0
		219		0.254016	0.0158198		0.376276	0.0227202					1.18321	1.69204		0.0135345	0.148845
		222		0.254355	0.0161004		0.378387	0.0225395					1.48301	1.24771		0.0838629	0
		225		0.248506	0.0157405		0.370981	0.0207722					0.055801	1.58263		0.0297241	0.0728903
		228		0.248853	0.0157223		0.371109	0.0211145					0.391139	1.60673		0.0450037	0.0921202
		231		0.25409	0.017701		0.363032	0.0191575					1.47961	1.62973		0.0913706	0.132586
		234		0.251105	0.015856		0.365629	0.0198161					1.48682	1.21867		0.0117779	0.0208556
		237		0.248389	0.0148395		0.364349	0.0198036					1.30672	1.46318		0.047878	0.0537071
		240		0.244342	0.0142214		0.36514	0.0201185					1.13926	1.32872		0.0514855	0.190022
		243		0.250201	0.0156595		0.360892	0.0199006					1.72825	1.65678		0.128974	0.0817206
		246		0.24812	0.0154724		0.362958	0.0204346					1.44308	1.60541		0.0433758	0.0690165
		249		0.25075	0.0164956		0.35232	0.0208836					1.09718	1.69049		0.0294997	0.110099
		252		0.246019	0.0148148		0.34568	0.0205732					0.481842	1.98991		0.0163515	0.0935665
		255		0.242618	0.0138882		0.348955	0.0225135					1.35677	1.37734		0.430511	0.0364753
		258		0.238036	0.0134314		0.348499	0.0189494					1.07797	1.75406		0.182801	0.164294
		261		0.235651	0.0139342		0.342904	0.0180492					1.25603	1.40302		0.0928394	0.0614271
		264		0.244241	0.0148461		0.344276	0.0168214					1.1873	1.61693		0.0435702	0.0343768
		267		0.241927	0.0153453		0.342336	0.019043					0.077849	1.51845		0.057315	0.0555173
		270		0.239129	0.0149602		0.342604	0.020054					0.545327	1.80853		0.0315374	0.295911
		273		0.236418	0.0142241		0.345224	0.0194054					0.183503	1.76398		0	0.423893
		276		0.235077	0.0138833		0.339627	0.0164815					0.988705	1.60284		0.036462	0.0299558
		279		0.236759	0.0139735		0.341597	0.0160083					1.54985	1.74146		0.0705035	0.088748
		282		0.241051	0.0156013		0.333833	0.0148095					1.56188	1.78097		0.473826	0.144624
		285		0.240913	0.016284		0.335039	0.0146474					0.833894	1.78951		0.0229894	0.220725
		288		0.232451	0.0156021		0.331806	0.0130506					1.44365	1.89948		0.139057	0.131855
		291		0.23003	0.0147746		0.326788	0.0124839					1.12699	1.83708		0.049214	0.223248
		294		0.235666	0.0154839		0.331252	0.0132576					1.21781	1.92671		0.0283629	0.0616039
		297		0.232902	0.014663		0.331514	0.0135114					1.17155	1.60095		0.0515058	0.0506337
		300		0.230751	0.0172032		0.333694	0.0136542					1.12171	1.49029		0.0182174	0.086479
		303		0.232564	0.0163019		0.330495	0.0148282					1.49404	1.59406		0.0798968	0.137506
		306		0.229677	0.014539		0.333377	0.0166185					0.906543	1.64396		0.0327135	0.168433
		309		0.230338	0.0141441		0.341138	0.0198554					0.042	1.608		0.0168109	0.0306443
		312		0.224463	0.0125313		0.348641	0.0228933					1.01099	1.97478		0.0294658	0.733044
		315		0.227326	0.0139852		0.357113	0.0274432					0.037784	1.67173		0	0.057849
		318		0.231234	0.0136989		0.359218	0.0268733					0.8938	1.64495		0.017892	0.0248937
		321		0.235222	0.0151229		0.350179	0.0247759					1.02923	1.61807		0.0233374	0.0734409
		324		0.235375	0.0166107		0.351409	0.0228302					1.40917	1.69253		0.108461	0.00092664
		327		0.229519	0.0151364		0.343048	0.0210575					0.074342	1.60168		0.0276279	0.141145
		330		0.227232	0.01342		0.34472	0.0226859					0.068737	1.56623		0.0336283	0.0387494
		333		0.226265	0.0138498		0.340015	0.0240312					1.14728	1.7317		0.100684	0.12985
		336		0.233099	0.0154566		0.341106	0.0234791					1.17366	1.97284		0.0228092	0.30624
		339		0.233243	0.0168607		0.339525	0.0220022					0.162717	1.85815		0.0702929	0.17048
		342		0.228374	0.0138589		0.342262	0.0216664					0.062528	1.79176		0.0344483	0.0593673
		345		0.228703	0.0139644		0.330495	0.0198875					0.066474	1.67687		0.0405081	0.0184459
		348		0.232576	0.0148143		0.338577	0.0208295					0.094673	1.48596		0.0360995	0.116138
		351		0.226437	0.0129798		0.3402	0.0214314					0.049227	1.55987		0.0225194	0.11381
		354		0.22699	0.0121364		0.336864	0.0209289					0.07097	1.74355		0.0225346	0.104206
		357		0.231809	0.0144479		0.32991	0.0168805					0.038077	1.7546		0.0164055	0.116969
		360		0.236009	0.0174305		0.329395	0.0160044					0.909529	1.60105		0.0103844	0.0942879
		363		0.233959	0.0159513		0.319047	0.0153048					0.044994	1.39429		0.0039034	0.107761
		366		0.231114	0.0163974		0.315095	0.0132914					0.052432	1.59945		0.00421063	0.182606
		369		0.228356	0.0148178		0.311142	0.0123378					1.29888	1.63328		0.065101	0.0614353
		372		0.23036	0.0142296		0.307336	0.0119308					0.058832	1.36719		0.028048	0.0920095
		375		0.226103	0.0126756		0.303528	0.0107544					0.72759	1.57397		0.0280042	0.0352998
		378		0.225768	0.0124979		0.303331	0.0101235					0.418671	1.36735		0.0456051	0.0385872
		381		0.230018	0.0129541		0.301168	0.00961394					1.68959	1.58015		0.641472	0.0622639
		384		0.228251	0.0144585		0.301551	0.00911248					0.047169	1.43317		0.038436	0.0530509
		387		0.224907	0.0130656		0.298941	0.00945354					0.776559	1.57577		0.0303686	0.04432
		390		0.224339	0.0127696		0.302612	0.00914305					0.060311	1.5715		0.0202212	0.0323404
		393		0.223825	0.012863		0.294939	0.00885803					0.755817	1.55429		0.0202832	0.14684
		396		0.222752	0.010815		0.29772	0.00935456					1.36725	1.40978		0.120758	0.0556834
		399		0.218767	0.00981035		0.302248	0.010427					1.34525	1.35261		0.409762	0.0254097
		402		0.21917	0.00993162		0.298846	0.0119645					1.22157	1.13574		0.0501493	0.040937
		405		0.21527	0.00982927		0.311848	0.0159265					0.143622	1.71733		0.0328885	0.0420796
		408		0.217787	0.0111538		0.312451	0.0196399					1.27917	1.66517		0.0465617	0.126675
		411		0.217386	0.0112634		0.318466	0.0215181					0.083645	1.57187		0.0399613	0.0882708
		414		0.218429	0.0102767		0.310696	0.0190647					0.725109	1.48067		0	0.0239246
		417		0.21157	0.00926773		0.317125	0.0192348					0.558838	1.65627		0.0452601	0.0836263
		420		0.214809	0.00948492		0.322906	0.0186065					0.080793	1.88176		0.0668135	0.144607
		423		0.218489	0.0114396		0.311202	0.0165077					1.20824	1.35909		0.0519156	0.0654113
													0.057304	1.8814		0.0462423	0.0792371
													0.650133	1.75708		0.0292623	0.0459818
													0.858945	1.49545		0.0590037	0.0593913
													0.128217	1.74814		0.0262392	0.0423181
													0.101152	1.44124		0.0902628	0.00181858
													0.099516	1.71658		0.0635986	0.105609
													0.689038	1.25465		0.0556844	0.0166567
													1.6408	1.65276		0.0530342	0.0384083
													0.054159	1.79585		0.0255279	0.102974
													0.069094	1.6594		0.0298074	0.214682
													0.929158	1.63413		0.0162856	0.17739
													1.33634	1.56148		0.0618247	0.061612
													1.3553	1.75788		0.0344011	0.0240593
													0.081879	1.91711		0.0414088	0.159645
													0.058336	1.65826		0.00942229	0.148647
													1.20207	1.54854		0.0391536	0.125974
													0.690277	1.80082		0.0360054	0.102654
													1.05374	1.66692		0.00988093	0.0898175
													0.095279	1.48995		0.060555	0.0785233
													0.097927	1.64949		0.0469183	0.0347428
													0.703543	1.77585		0.0117218	0.0395486
													0.080631	1.23261		0.00327522	0.0655383
													0.333838	1.61774		0.029186	0.0481688
													0.90893	1.52586		0	0.159267
													1.47117	1.51388		0.103302	0.194479
													0.067385			0.0482809
													0.07894			0.018692
													0.674441			0.00905414
													1.52419			0.00456744
													0.994183			0.0248182
													1.66719			0.154117
													0.568303			0.0374416
													0.058842			0.0507116
													0.106714			0.0839753
													0.106844			0.0191449
													1.19295			0.0283652
													0.785143			0.0204978
													0.861051			0.0373644
													1.23994			0.0565572

## Sheet: Fig.1F
			Figure 1F (left panel)										Figure 1F (right panel)
			Average Trace- Cytosolic Ca2+ response to 10mM UTP										Summary of Peak ADP Ca2+ response and Ca2+ after 5 minutes of UTP addition
		X-axis: Time (sec), Y-axis: Fluo-4/Fura-Red Ratio; SEM- Std. error of mean											Each data point is single-cell baseline subtracted Fluo-4/Fura-red ratio (Baseline: Minimum Calcium level before UTP addition)
		Time (sec)		WT			TREM2 KO
				Mean	SEM		Mean	SEM					Peak Ca2+ response			Ca2+ at 5 min after ADP
													WT	TREM2 KO		WT	TREM2 KO
cells in 1(mM) Ca2+		0		0.19177	0.00922261		0.161005	0.00477243					WT_UTP_Peak-BL	KO_UTP_Peak-BL		WT_UTP_Ca5-BL	KO_UTP_Ca5-BL
		3		0.193909	0.0074476		0.164781	0.00486482
		6		0.191168	0.00584479		0.164563	0.00510066					0.731331	1.06547		0	0			Column F	KO_UTP_Peak-BL
		9		0.187127	0.00571733		0.162353	0.00481122					0.686704	1.08842		0	0			vs.	vs.
		12		0.192306	0.00797701		0.163411	0.00467622					0.479101	0.993007		0	0			Column E	WT_UTP_Peak-BL
		15		0.192501	0.00987969		0.16195	0.0051189					0.406793	1.11081		0.00443987	0
		18		0.191656	0.00655341		0.162911	0.0051931					0.309222	0.905161		0.00985502	0.0113976			Mann Whitney test
		21		0.1951	0.00522913		0.164583	0.00517567					0.7843	0.670589		0.00383818	0.0228454			P value	< 0.0001
		24		0.187831	0.00476832		0.161076	0.00482893					0.437201	1.07646		0	0			Exact or approximate P value?	Approximate
		27		0.187955	0.00409799		0.16392	0.00492631					0.774359	1.13579		0	0			P value summary	****
		30		0.18894	0.00460493		0.165942	0.00510957					0.799095	1.19398		0.0636284	0			Significantly different? (P < 0.05)	Yes
		33		0.19116	0.00463322		0.164005	0.00513348					1.16939	0.82769		0	0			One- or two-tailed P value?	Two-tailed
		36		0.18846	0.00431865		0.164859	0.00488706					1.0037	1.13784		0.0261181	0			Sum of ranks in column E,F	42903 , 56333
		39		0.181883	0.00409909		0.164448	0.00478942					0.969088	1.13516		0	0			Mann-Whitney U	6588
		42		0.187978	0.00395518		0.163649	0.00508871					0.28182	0.812484		0.0171034	0.00569499
		45		0.186619	0.00487714		0.165625	0.00504043					0.642365	1.21756		0	0.0910405			Difference between medians
		48		0.18804	0.0042741		0.165856	0.00506637					0.699957	1.06896		0	0.0383539			Median of column E	0.1864
		51		0.184166	0.00443446		0.164979	0.00512396					0.443745	0.988852		0.0092228	0			Median of column F	1.068
		54		0.184564	0.00405643		0.166968	0.00514962					1.01746	0.971984		0	0			Difference: Actual	0.8819
		57		0.192506	0.00414003		0.167648	0.0050974					0.94008	1.23242		0	0.0442613			Difference: Hodges-Lehmann	0.672
		60		0.190366	0.00435897		0.168692	0.00536435					0.515666	0.708763		0	0.0648326
		63		0.191808	0.00481297		0.169725	0.0050741					0.562942	0.657276		0.0166769	0
		66		0.192738	0.00521586		0.16888	0.0053564					1.12826	0.97644		0	0.045601			Column H	KO_UTP_Ca5-BL
		69		0.188737	0.00695678		0.171069	0.00522876					0.726188	0.684222		0.00827766	0			vs.	vs.
		72		0.19263	0.00890795		0.169552	0.00510157					0.016971	1.3017		0	0			Column G	WT_UTP_Ca5-BL
		75		0.190065	0.00677776		0.169955	0.00485909					0.801688	0.950919		0.0388755	0
		78		0.192141	0.00621757		0.167645	0.00533751					1.00591	0.975159		0	0			Mann Whitney test
		81		0.189542	0.00654607		0.167169	0.00509174					0.467475	0.695768		0	0			P value	0.0002
		84		0.19395	0.00532991		0.170249	0.00565159					0.381933	1.0304		0.017048	0			Exact or approximate P value?	Approximate
		87		0.193685	0.00600986		0.170733	0.0051951					0.466648	0.672924		0.0100737	0.00417568			P value summary	***
		90		0.18773	0.00536776		0.171186	0.00579595					0.740292	1.03587		0	0			Significantly different? (P < 0.05)	Yes
		93		0.193332	0.00484117		0.170692	0.00539961					0.619379	1.04022		0.0133899	0			One- or two-tailed P value?	Two-tailed
		96		0.189023	0.00554605		0.170142	0.0053569					1.24278	1.12579		0.104997	0			Sum of ranks in column G,H	64956 , 34280
		99		0.1937	0.00503012		0.170071	0.00500445					0.696876	1.01871		0.0193308	0			Mann-Whitney U	18704
		102		0.185018	0.00457417		0.166883	0.00542835					0.691693	0.822735		0.0142521	0.01099
		105		0.190508	0.00405873		0.169507	0.00531722					0.81723	0.781013		0	0.0211854			Difference between medians
		108		0.191066	0.00495383		0.169137	0.00559567					0.839564	0.756503		0.0946081	0			Median of column G	0.02357
		111		0.196718	0.00624241		0.167456	0.00545383					1.13188	0.953923		0	0			Median of column H	0.01288
		114		0.194859	0.00725873		0.16882	0.00556195					0.946671	0.710711		0.0359717	0.00794167			Difference: Actual	-0.01069
		117		0.200011	0.0094314		0.167161	0.00497129					0.255422	0.914813		0.00545381	0.0168463			Difference: Hodges-Lehmann	-0.00669
1Ca2+ 10mM UTP		120		0.200737	0.00663302		0.165255	0.00484212					0.838287	0.792194		0	0.0679479
		123		0.214284	0.00567653		0.17534	0.00541044					0.450282	0.895324		0	0.216559
		126		0.307072	0.039084		0.368093	0.0439054					0.893059	0.918726		0	0
		129		0.437772	0.0631459		1.13388	0.0768712					0.844643	0.618337		0.015467	0
		132		0.487987	0.0640468		1.09069	0.0581204					0.865219	1.07661		0.00236119	0.0138295
		135		0.51779	0.058595		0.992344	0.0356778					0.932036	1.08562		0	0
		138		0.530242	0.0514987		0.930851	0.0284567					1.03459	0.885658		0	0
		141		0.486515	0.0433251		0.815499	0.0301746					0.797668	0.652388		0	0
		144		0.432134	0.0355315		0.702184	0.0249736					0.998656	0.933811		0.0642814	0.0103357
		147		0.382944	0.0311134		0.628872	0.0228101					1.23616	1.02379		0	0
		150		0.375349	0.0313202		0.587579	0.0231798					0.470248	1.01997		0	0
		153		0.379619	0.0320519		0.54705	0.0243991					0.754826	1.08674		0.0383713	0.00905296
		156		0.369985	0.0298043		0.524119	0.024491					1.12426	0.758584		0	0
		159		0.363401	0.0308414		0.507522	0.0266845					0.597794	0.645557		0	0
		162		0.327502	0.0253394		0.508697	0.0284537					0.902191	1.11731		0.00639971	0
		165		0.306975	0.0235445		0.527436	0.0299762					0.679625	0.834289		0.0120794	0
		168		0.27607	0.0192337		0.528609	0.0287452					0.863055	0.875037		0	0
		171		0.246843	0.0143142		0.495594	0.0244636					0.768556	0.897617		0	0
		174		0.228986	0.0111111		0.436956	0.02169					1.10472	0.789297		0	0.00736085
		177		0.217205	0.00821436		0.385155	0.0205578					0.794418	0.896333		0	0
		180		0.21538	0.00987148		0.346569	0.0211916					1.32473	0.784211		0.0705907	0.0219047
		183		0.208708	0.0112261		0.312389	0.0200755					0.920873	1.02958		0	0.0440602
		186		0.210385	0.00869303		0.28273	0.0188063					0.624644	1.11779		0.00378925	0
		189		0.207259	0.0103836		0.261775	0.0172555					0.780865	1.10744		0.0098957	0
		192		0.21266	0.0107066		0.253087	0.0177736					0.447861	0.95784		0	0
		195		0.204475	0.00966695		0.236785	0.0163505					0.597272	0.708385		0.00491091	0.00585759
		198		0.201661	0.00784209		0.22791	0.0169369					0.592682	1.13908		0.0059578	0.336706
		201		0.199902	0.00632753		0.223012	0.0164152					0.77543	1.06358		0.0859863	0
		204		0.201459	0.00640306		0.218547	0.0156425					1.27311	1.08503		0.0437952	0.00114188
		207		0.193646	0.00603906		0.215403	0.0164227					0.581937	0.885532		0	0
		210		0.18948	0.00591089		0.21514	0.0150926					0.605147	1.48852		0.0105411	0.0214087
		213		0.193853	0.00597378		0.208591	0.0142803					0.924194	0.918313		0.0109942	0
		216		0.18934	0.00552639		0.209962	0.0144921					1.1262	0.844801		0	0
		219		0.19244	0.00591786		0.20709	0.0138204					0.684222	1.04774		0.0280527	0
		222		0.192948	0.00630203		0.206057	0.0136794					1.04294	1.24174		0	0
		225		0.200575	0.00598866		0.205009	0.014002					1.25247	1.29235		0.0472076	0.0519912
		228		0.196132	0.00569909		0.203568	0.0138316					0.413747	1.35782		6.4783e-05	0
		231		0.201976	0.0063862		0.203122	0.0135445					0.60277	0.910463		0	0.00756543
		234		0.201765	0.00708144		0.20298	0.0132183					0.784372	1.18667		0	0.0461036
		237		0.19739	0.00679533		0.197711	0.0129969					0.560724	1.26092		0	0.0211913
		240		0.197909	0.00644224		0.19815	0.0122275					0.542974	1.36818		0.0172918	0.0251287
		243		0.203851	0.00664611		0.199538	0.0123597					0.422636	0.991604		0	0.0074402
		246		0.204432	0.00659919		0.200149	0.0120624					0.855471	0.882611		0	0.0202892
		249		0.196619	0.00680082		0.197986	0.0116301					0.906956	0.925825		0.0810573	0.00972418
		252		0.193919	0.00612385		0.195347	0.0114142					0.69886	1.17537		0	0.0182236
		255		0.196398	0.00651133		0.197761	0.0113363					0.690337	1.31206		0.00385495	0.0110194
		258		0.200815	0.00619572		0.192497	0.0108684					0.447646	1.36278		0	0.0518898
		261		0.199936	0.00639024		0.196117	0.0110844					0.546732	1.6274		0.0357695	0.0157394
		264		0.201403	0.00633777		0.197314	0.0114035					1.13465	1.06765		0.427986	0.006135
		267		0.20165	0.00703148		0.19336	0.0109981					0.719164	1.25446		0.0261298	0.00892142
		270		0.20276	0.00707797		0.194591	0.0112773					0.100092	1.41427		0.0619584	0.00440347
		273		0.195941	0.00590309		0.190884	0.010959					0.667086	1.26419		0.0275769	0.0336139
		276		0.20215	0.00589133		0.190171	0.010472					0.10512	1.40792		0.0974361	0.011586
		279		0.19798	0.00641698		0.190128	0.010352					1.63272	1.3607		0.10129	0.0238441
		282		0.198116	0.00903235		0.189947	0.0103948					0.759332	1.08685		0.03574	0.0201863
		285		0.205036	0.0112842		0.191426	0.0102691					1.17281	1.20823		0.0114738	0.0336013
		288		0.200543	0.00747672		0.188832	0.0100176					1.0451	1.38317		0.0414847	0.296956
		291		0.201026	0.00633626		0.189645	0.00978188					1.46586	1.26583		0.00270287	0.0232297
		294		0.196335	0.0061855		0.189076	0.0102012					0.079789	1.30626		0.0688456	0.055918
		297		0.201059	0.00541061		0.188777	0.00960028					0.118606	1.32936		0.0221597	0.0617555
		300		0.203147	0.00587563		0.188336	0.00975643					0.110093	1.4954		0.0893491	0
		303		0.197082	0.00616373		0.188521	0.0094384					0.644469	1.26287		0.03638	0.0144304
		306		0.197931	0.00636238		0.187253	0.00956888					0.638019	1.46384		0.0641088	0.0429084
		309		0.195655	0.00514566		0.1861	0.00953404					0.955493	1.14448		0.0427667	0.0239314
		312		0.196487	0.00597518		0.189117	0.00962175					0.133994	1.06171		0.0351911	0.044004
		315		0.202228	0.00499623		0.187535	0.00961362					0.731403	1.20991		0.0406892	0.00618696
		318		0.19944	0.0057223		0.187438	0.00971532					1.61543	1.05845		0.106996	0.019178
		321		0.199525	0.00599175		0.187581	0.0102348					0.756708	1.38284		0.0810512	0.0458729
		324		0.200471	0.0055913		0.183849	0.00981916					0.114535	1.22932		0.0921727	0.0150246
		327		0.195093	0.00496395		0.185497	0.00966239					0.083308	1.26608		0.0671325	0.0154656
		330		0.205138	0.00575964		0.182711	0.00904503					0.096637	1.26149		0.0751502	0.00386745
		333		0.204303	0.00679599		0.183421	0.00908573					0.067099	1.32606		0.0159996	0.0033028
		336		0.201778	0.00534595		0.184476	0.00868137					0.132505	1.25522		0.0563721	0.0230511
		339		0.201742	0.00528275		0.184069	0.00862881					0.096247	1.21871		0.0601365	0.00462758
		342		0.199737	0.00483164		0.182318	0.0085948					1.40739	1.3476		0.0264692	0.014329
		345		0.197712	0.00502053		0.183401	0.00880539					0.703	1.3163		0.0189437	0.0219578
		348		0.198313	0.00529841		0.183402	0.00844088					0.919384	1.04899		0.0218217	0.0653191
		351		0.199593	0.00535159		0.182625	0.00875144					0.076784	1.19642		0.0276144	0.0346451
		354		0.198981	0.0048042		0.18254	0.0086602					1.37431	1.23294		0.048487	0.016722
		357		0.194555	0.00486525		0.182895	0.00880276					0.098713	0.837606		0.0275098	0.0212576
		360		0.199296	0.00540697		0.185107	0.00809527					0.405132	0.424766		0.0941549	0.0337767
		363		0.194718	0.00487448		0.186066	0.0088403					1.06657	0.106729		0.0366785	0.00686757
		366		0.197852	0.00502139		0.184463	0.00928051					0.127758	1.4281		0.0395987	0.0349667
		369		0.1983	0.00580031		0.180148	0.00891715					0.98055	0.801215		0.0236335	0.0181928
		372		0.197446	0.00465497		0.183439	0.00965825					0.78476	0.061252		0.00971634	0.0512413
		375		0.198823	0.00498887		0.185154	0.0096094					0.076678	1.07103		0.00662801	0.017915
		378		0.195282	0.0050576		0.187214	0.0100581					0.077968	0.776192		0.0615349	0
		381		0.199973	0.00518168		0.188193	0.0104079					0.105832	1.30134		0.0129477	0.0499717
		384		0.195922	0.00502969		0.183374	0.0102692					0.099664	1.14178		0.02201	0.00708799
		387		0.198262	0.005417		0.183239	0.0098425					1.36652	1.01621		0.0943337	0.0309679
		390		0.196468	0.00547334		0.182261	0.00969626					0.087738	1.38152		0.0707314	0.0661322
		393		0.195822	0.00509121		0.182128	0.00882499					0.972405	1.29987		0.0391772	0.0318436
		396		0.194932	0.00469771		0.18009	0.00827206					0.079188	1.27192		0.0169116	0
		399		0.195375	0.00461574		0.180286	0.007933					0.832467	0.850739		0.0106893	0.106435
		402		0.197855	0.00567707		0.18139	0.00798362					0.965242	0.917118		0.0183133	0.024865
		405		0.195818	0.00544907		0.179856	0.00793366					0.057323	1.35431		0.0213768	0.0345008
		408		0.196544	0.00433664		0.180652	0.00780853					0.072937	1.33224		0.0126336	0.0216542
		411		0.192667	0.00501358		0.177844	0.0077081					0.072617	1.48615		0.0298509	0.0248547
		414		0.195251	0.00517406		0.17992	0.00808288					1.5015	0.938656		0.0707399	0.0282736
		417		0.201246	0.00503507		0.181739	0.00824417					0.44679	1.30252		0.0644202	0.0351564
		420		0.196187	0.00460552		0.176383	0.00785125					0.073887	1.08683		0.0155268	0.0241772
		423		0.200393	0.00493676		0.177682	0.00744186					1.23647	1.36159		0.0494913	0.0570646
													0.82506	1.28251		0.0279385	0.0136357
													0.858347	0.697411		0.0326343	0.046363
													0.114933	0.892498		0.0363424	0.0395684
													0.971434	0.823281		0.00634238	0
													0.840394	0.922418		0.00327764	0.010306
													0.084731	0.069531		0.0548546	0.0102804
													0.186449	1.36679		0.0518193	0.0120327
													0.093484	1.42743		0.00810089	0.0274942
													0.082798	1.40013		0.0505745	0.0587138
													0.095302	1.48231		0.0489729	0.0108851
													0.106245	1.0161		0.072303	0.0200103
													0.104232	1.13492		0.0555166	0.0161296
													1.01336	1.07343		0.0608684	0.0218448
													0.066486	0.998675		0.0389213	0.0620938
													0.089378	0.592595		0.0526842	0.0149877
													0.109535	0.933422		0.0141995	0.0268522
													0.925131	1.00656		0.0964869	0.0396053
													0.13718	1.1844		0.0727636	0.0405098
													1.34056	1.177		0.0426005	0.0283653
													0.113533	1.4745		0.0279652	0
													0.14987	1.14602		0.0793897	0.0480841
													0.124809	0.921094		0.0203238	0.0102449
													0.081643	1.01913		0.0573598	0.00040593
													0.041996	0.099293		0.010076	0.0179412
													1.22673	1.38472		0	0.0397261
													0.087336	0.822717		0.0549642	0.0121336
													0.121123	1.30448		0.121234	0.00046827
													0.141089	0.713716		0.13318	0.0672606
													0.096473	1.23929		0.00909856	0
													0.078817	1.13774		0	0.015529
													0.10121	1.03414		0.0285984	0.0340138
													1.22545	1.43551		0.080438	0.0330376
													0.125171	1.07756		0	0.0230933
													0.09776	0.097995		0.0206336	0.00327237
													0.072465	0.788444		0.0002601	0.0362802
													0.896698	1.04631		0.0275012	0.0686211
													0.083898			0.051006
													0.859202			0.0763738
													0.11192			0.0608365
													0.862741			0
													1.15938			0.0398008
													0.402559			0.040625
													0.127638			0.081716
													0.126188			0.0254666
													0.080541			0.0435422
													0.65769			0.0629699
													0.090904			0.0671975
													0.116997			0.0381257
													0.088608			0.0336647
													0.498503			0.0538824
													0.084268			0.0494121
													0.117206			0.0626302
													0.060113			0.0106689
													0.100528			0.0416972
													0.63418			0
													0.108168			0
													0.079282			0
													0.068083			0.0127215
													0.049354			0.00960783
													0.058234			0.0576521
													0.074185			0.012458
													0.074267			0.00669013
													0.738465			0
													0.061091			0.0235733
													0.052648			0.0174961
													0.050241			0.0407109
													0.070465			0.0327873
													0.107843			0.0386236
													0.085312			0.0821554
													0.08556			0.0233757
													0.09409			0.109197
													0.080798			0.0266002
													0.042373			0.0570218
													0.076361			0.0320123
													0.047071			0
													0.058565			0.0192923
													0.066329			0.0308057
													0.086823			0.0626493
													0.116245			0.055369
													0.049996			0.0152461
													0.062339			0.0105759
													0.186937			0
													0.064579			0.0110843
													0.057692			0.0290715
													0.070652			0.0222548
													0.12112			0.050881
													0.123712			0.0546821
													0.048372			0.0217034
													0.116172			0.0552548
													0.099928			0.051142
													0.07857			0.0456383
													0.093274			0.0347238
													0.075662			0.0522265
													0.047862			0.0177827
													0.072666			0.0254753
													0.098845			0.0337756
													0.056519			0.0227335
													0.719598			0.0245864
													0.109928			0
													0.060855			0.0370764
													0.046814			0.0111108
													0.067179			0.0529011
													0.068803			0.0221324
													0.036911			0.0140276
													0.065453			0.037809
													0.091171			0.0252059
													0.07961			0.0472118
													0.087452			0.0409821
													0.106781			0.00985166
													0.078147			0
													0.05371			0.0414501
													0.12283			0.0409569
													0.067618			0.0393357
													0.043458			0.0295808
													0.067927			0.00298382
													0.056025			0.0445754
													0.073731			0.0184863
													0.071372			0.0039179
													0.061652			0.0491721
													0.044536			0.0169326
													0.068092			0.0485628
													0.062387			0.0121535
													0.062568			0.0260071
													0.062836			0.0366965
													0.093135			0.0204113
													0.053647			0.029179
													0.057243			0.00628081
													0.058391			0.0264036
													0.091592			0.0308298

## Sheet: Figure 1 Supp 1 Panels B-C
		Fig. 1-fig supp 1B (left panel, trace)									Fig. 1-fig supp 1B (right panel, bar graphs)												Fig. 1-fig supp 1C (left panel, trace)						Fig. 1-fig supp 1C (right panel, bar-graph)
			GCaMP6f intensity			tdTomato intensity					GCaMP6f int (low, high Ca)		tdTomato int (low, high Ca)											GCaMP6f intensity					Salsa6f G/R ratio (low, high Ca)
		time(sec)	Mean	SEM		Mean	SEM				G(lowCa)	G(highCa)	R(lowCa)	R(highCa)									time(sec)	Mean	SEM				G/R (lowCa)	G/R (highCa)
		0	16.1468	1.62996		41.8222	4.11905				15.519	215.166	64.487	80.491			Table Analyzed	Fig1-fig supp1-Salsa6f quantification					0	0.402452	0.03402				0.232686	3.00253			Table Analyzed	Fig1-fig supp1-Salsa6f quantification
		2.5	16.1764	1.36595		42.6481	4.15006				10.286	85.838	29.881	35.539									2.5	0.394939	0.025806				0.329019	2.70495
		5	16.3208	1.28674		41.5796	4.17155				6.568	74.03	26.229	27.76			Column B	G(highCa)					5	0.41175	0.021582				0.245622	3.15966			Column F	G/R(highCa)
		7.5	15.7596	1.28559		42.6298	4.2512				18.555	240.753	82.592	97.149			vs.	vs.					7.5	0.383863	0.017906				0.211031	2.88449			vs.	vs.
		10	14.9599	1.2553		41.6188	3.87356				10.81	138.49	38.341	48.251			Column A	G(lowCa)					10	0.370657	0.018922				0.257878	3.40867			Column E	G/R(lowCa)
		12.5	15.7876	1.14597		41.3622	4.1221				12.449	181.644	52.547	57.842									12.5	0.402636	0.018856				0.228619	3.49461
		15	15.3549	1.2945		41.1879	3.9816				9.067	129.751	36.713	42.459			Mann Whitney test						15	0.38321	0.015054				0.235488	3.88351			Mann Whitney test
		17.5	15.212	1.26374		41.6081	4.09728				18.084	159.481	51.532	58.4			P value	< 0.0001					17.5	0.378298	0.014769				0.331823	3.02672			P value	< 0.0001
		20	15.4495	1.27522		41.897	4.13083				20.585	204.907	54.807	60.817			Exact or approximate P value?	Exact					20	0.38164	0.017256				0.357459	3.64151			Exact or approximate P value?	Exact
		22.5	15.5908	1.23781		42.5575	4.25959				12.396	157.809	46.371	53.007			P value summary	****					22.5	0.381589	0.017849				0.252367	3.26582			P value summary	****
		25	15.1134	1.23074		41.3552	4.22442				13.431	168.571	43.587	51.927			Significantly different? (P < 0.05)	Yes					25	0.382743	0.019723				0.279237	3.64069			Significantly different? (P < 0.05)	Yes
		27.5	15.3722	1.27943		40.9121	4.11771				11.677	151.134	40.433	45.204			One- or two-tailed P value?	Two-tailed					27.5	0.393415	0.021838				0.279327	3.63241			One- or two-tailed P value?	Two-tailed
		30	16.2159	1.40973		41.1374	4.00394				11.877	138.986	45.544	52.599			Sum of ranks in column A,B	190.0 , 551.0					30	0.408244	0.019142				0.244137	2.92014			Sum of ranks in column E,F	190.0 , 551.0
		32.5	15.9401	1.29493		41.7874	4.14625				12.239	152.686	46.872	53.859			Mann-Whitney U	0					32.5	0.397561	0.017295				0.251965	3.17432			Mann-Whitney U	0
		35	15.4676	1.29622		42.4197	4.09002				17.965	234.121	58.919	66.284									35	0.377363	0.020099				0.291153	3.89598
		37.5	15.3797	1.21014		41.8868	4.13631				9.271	60.968	23.508	26.426			Difference between medians						37.5	0.384831	0.019589				0.357047	2.84546			Difference between medians
		40	15.4556	1.30157		42.9544	4.0807				4.567	67.234	25.278	26.082			Median of column A	11.88					40	0.371179	0.017561				0.174313	2.64953			Median of column E	0.252
		42.5	14.9264	1.29617		44.1659	4.10669				2.609	47.848	17.686	19.902			Median of column B	151.1					42.5	0.345884	0.016915				0.140811	2.61519			Median of column F	3.16
		45	15.9339	1.3532		43.6229	4.09				7.54	102.484	37.18	39.579			Difference: Actual	139.3					45	0.375196	0.016317				0.191672	2.78436			Difference: Actual	2.908
		47.5	17.683	2.0142		43.7909	4.16668										Difference: Hodges-Lehmann	137.2					47.5	0.407168	0.027437								Difference: Hodges-Lehmann	2.88
		50	17.5711	1.95541		44.5169	4.17996																50	0.397184	0.025909
		52.5	16.1747	1.60303		43.9371	4.32374																52.5	0.376274	0.021025
		55	16.3783	1.59585		43.5446	3.85996										Table Analyzed	Fig1-fig supp1-Salsa6f quantification					55	0.377158	0.017603
		57.5	15.5185	1.30442		43.629	4.03561																57.5	0.363908	0.014254
		60	15.0834	1.37619		43.7637	4.38014										Column D	R(highCa)					60	0.353845	0.015975
		62.5	15.331	1.38579		43.9175	4.17073										vs.	vs.					62.5	0.357514	0.016212
		65	15.6312	1.26144		44.4577	4.09185										Column C	R(lowCa)					65	0.363097	0.017435
		67.5	15.2136	1.30953		44.8374	4.18429																67.5	0.347766	0.015672
		70	15.866	1.26528		43.9637	4.24906										Mann Whitney test						70	0.380508	0.021191
		72.5	15.5349	1.24595		45.5641	4.47305										P value	0.256					72.5	0.355824	0.016647
		75	15.5242	1.23183		43.5121	4.09018										Exact or approximate P value?	Exact					75	0.369566	0.017847
		77.5	15.4936	1.25243		42.178	3.93966										P value summary	ns					77.5	0.380021	0.016456
		80	15.4913	1.23145		43.0721	3.93572										Significantly different? (P < 0.05)	No					80	0.369292	0.014381
		82.5	15.2041	1.23939		42.906	4.11849										One- or two-tailed P value?	Two-tailed					82.5	0.365789	0.015371
		85	15.2503	1.20065		43.2371	4.19571										Sum of ranks in column C,D	331.0 , 410.0					85	0.368523	0.018431
		87.5	14.5195	1.1673		42.8653	4.08537										Mann-Whitney U	141					87.5	0.351696	0.016622
		90	15.3122	1.31374		43.1647	4.0164																90	0.366122	0.016929
		92.5	15.4571	1.23251		42.1523	3.90596										Difference between medians						92.5	0.379934	0.017818
		95	15.504	1.16359		43.2376	4.1992										Median of column C	43.59					95	0.377628	0.019154
		97.5	15.3548	1.27718		42.9092	3.88935										Median of column D	51.93					97.5	0.369181	0.017467
		100	15.3086	1.27241		43.5225	4.01449										Difference: Actual	8.34					100	0.361018	0.015058
		102.5	15.3746	1.11499		43.3576	3.94914										Difference: Hodges-Lehmann	6.01					102.5	0.367942	0.016945
		105	15.2243	1.24177		42.1157	4.16831																105	0.376835	0.017368
		107.5	15.3604	1.19709		41.9484	3.92771																107.5	0.381083	0.016596
		110	15.7253	1.2789		42.202	3.87125																110	0.381827	0.016815
		112.5	15.7982	1.19073		43.2789	4.01431																112.5	0.377666	0.015646
		115	15.8159	1.23872		43.2692	4.25613																115	0.379585	0.016448
		117.5	15.7291	1.43506		42.956	4.1372																117.5	0.37764	0.018405
		120	16.4334	1.52669		42.7613	3.99635																120	0.392526	0.019616
		122.5	15.5961	1.30953		43.4122	4.27086																122.5	0.372577	0.017041
		125	15.2936	1.22968		41.9659	4.02688																125	0.378865	0.018813
		127.5	15.2116	1.29945		42.0018	3.76535																127.5	0.368822	0.015935
		130	14.8338	1.23574		43.4186	4.0923																130	0.35244	0.015954
		132.5	15.1126	1.123		43.4966	4.03861																132.5	0.359056	0.013337
		135	15.3604	1.13578		43.313	4.24426																135	0.375791	0.021639
		137.5	15.2892	1.23185		43.3698	4.05064																137.5	0.365478	0.014746
		140	15.04	1.21384		43.5535	4.08151																140	0.357432	0.017477
		142.5	14.7241	1.32321		45.2806	4.09338																142.5	0.329297	0.012475
		145	15.208	1.22229		44.5911	4.04756																145	0.348563	0.016529
		147.5	15.0556	1.24489		45.1527	4.07471																147.5	0.342908	0.015911
		150	14.7772	1.29388		45.4753	3.85763																150	0.328077	0.014261
		152.5	15.3477	1.30221		44.9899	3.92565																152.5	0.346797	0.014855
		155	14.5128	1.19583		46.0055	4.25765																155	0.323649	0.014036
		157.5	15.1324	1.24973		45.1424	3.92183																157.5	0.341122	0.013183
		160	14.554	1.23253		45.1121	4.08242																160	0.330626	0.016605
		162.5	14.974	1.20091		44.8855	3.93055																162.5	0.34162	0.016197
		165	16.3663	1.70631		44.6665	3.98841																165	0.369445	0.021331
		167.5	15.8519	1.52024		45.584	3.98353																167.5	0.35316	0.018125
		170	15.1938	1.2869		45.4093	3.93733																170	0.33683	0.012352
		172.5	15.5514	1.35341		45.7274	4.2671																172.5	0.345731	0.015396
		175	15.0817	1.27807		45.2105	4.04166																175	0.33801	0.011334
		177.5	15.0547	1.17223		46.8419	4.07036																177.5	0.328679	0.012468
		180	15.519	1.25513		46.4144	4.02647																180	0.339026	0.013198
		182.5	15.2794	1.24154		47.4492	4.23811																182.5	0.329806	0.015514
		185	15.6431	1.22689		46.3496	4.08706																185	0.345607	0.014999
		187.5	15.2142	1.2859		46.8482	3.92661																187.5	0.32787	0.014885
		190	15.4409	1.16543		46.0429	4.07047																190	0.345824	0.016371
		192.5	14.9883	1.22054		46.7621	4.20833																192.5	0.327677	0.014191
		195	15.4586	1.28284		47.1178	4.17433																195	0.335746	0.016569
		197.5	16.6513	1.71222		47.1797	4.09087																197.5	0.35626	0.022173
		200	17.0891	1.9997		47.4021	4.31926																200	0.366674	0.031042
		202.5	16.9449	1.76391		45.9858	4.07823																202.5	0.374081	0.024772
		205	16.6346	1.5035		46.514	4.28521																205	0.364839	0.018722
		207.5	15.9035	1.38562		46.7554	4.08277																207.5	0.344151	0.014087
		210	15.8549	1.26889		46.6016	4.11414																210	0.346424	0.013622
		212.5	15.4914	1.25707		47.9039	4.37039																212.5	0.330251	0.012863
		215	15.6212	1.14147		47.2494	4.30685																215	0.342205	0.014082
		217.5	15.5195	1.20438		46.4993	4.39363																217.5	0.345223	0.015962
		220	15.4302	1.20517		46.8486	4.26119																220	0.339546	0.015596
		222.5	15.368	1.31194		45.97	4.32612																222.5	0.344718	0.015193
		225	15.7586	1.21491		45.1556	4.12131																225	0.36076	0.016679
		227.5	15.6104	1.37797		45.4562	4.09919																227.5	0.347669	0.0149
		230	15.4129	1.25591		46.84	4.18039																230	0.335894	0.014262
		232.5	15.6358	1.31138		47.7643	4.2414																232.5	0.335174	0.015871
		235	15.4916	1.21203		47.1382	4.12996																235	0.336786	0.0136
		237.5	15.8015	1.26733		46.5892	4.15496																237.5	0.346226	0.014735
		240	15.9034	1.29435		46.6792	3.98732																240	0.346045	0.013361
		242.5	15.6779	1.20927		46.1422	4.15073																242.5	0.34876	0.012787
		245	16.111	1.20653		46.2541	4.11165																245	0.359517	0.015445
		247.5	15.8803	1.23822		47.0953	4.18132																247.5	0.347591	0.016524
		250	15.4767	1.19057		47.1102	4.07747																250	0.335867	0.011749
		252.5	15.7674	1.2327		46.6999	4.0095																252.5	0.34399	0.012653
		255	16.0633	1.32541		46.9704	4.02763																255	0.349091	0.014621
		257.5	15.865	1.23972		46.1352	4.04925																257.5	0.351838	0.013391
		260	16.216	1.23612		46.5146	4.15595																260	0.359133	0.017365
		262.5	15.8133	1.31452		46.865	4.14618																262.5	0.34377	0.014805
		265	16.2621	1.24626		45.0054	4.01132																265	0.373953	0.017246
		267.5	15.5367	1.20603		47.699	4.49885																267.5	0.337113	0.014443
		270	15.5938	1.21347		46.6267	4.09191																270	0.34229	0.012811
		272.5	15.7179	1.20191		47.1443	4.15895																272.5	0.343744	0.014961
		275	15.3279	1.22687		46.9969	4.1819																275	0.334578	0.014376
		277.5	15.5857	1.31956		46.8534	4.20782																277.5	0.339912	0.014504
		280	15.6433	1.25718		46.2674	4.10614																280	0.347204	0.015393
		282.5	15.5176	1.29884		46.7052	4.43051																282.5	0.340894	0.013701
		285	15.255	1.22745		46.4502	4.26075																285	0.338294	0.014518
		287.5	15.8731	1.34614		47.2606	4.17074																287.5	0.343289	0.014239
		290	15.5551	1.23927		46.9627	4.13652																290	0.340905	0.017938
		292.5	15.3146	1.20194		46.6554	4.03459																292.5	0.336607	0.014924
		295	15.3263	1.19615		46.8711	4.19791																295	0.336653	0.013194
		297.5	15.4778	1.22373		47.9869	4.10737																297.5	0.329566	0.013684
		300	15.7179	1.25557		47.1977	4.01814																300	0.339147	0.014462
		302.5	15.3263	1.18136		46.0282	3.96751																302.5	0.341039	0.012844
		305	15.5236	1.27505		47.0132	3.98907																305	0.337441	0.016946
		307.5	15.5198	1.20191		46.6089	3.83718																307.5	0.340411	0.015366
		310	18.1222	1.70701		46.9984	4.02415																310	0.391558	0.022644
		312.5	27.0083	3.67179		48.4	4.03235																312.5	0.590019	0.091633
		315	32.7435	3.62245		47.7163	4.16075																315	0.711781	0.077102
		317.5	36.46	3.56128		48.9369	4.01069																317.5	0.752183	0.058372
		320	38.3686	3.89552		48.6731	3.83447																320	0.785848	0.06276
		322.5	38.0446	4.26422		48.7998	4.17821																322.5	0.781979	0.064466
		325	37.5964	4.42886		47.6637	3.93796																325	0.785072	0.069557
		327.5	36.5784	4.48806		47.3086	3.88171																327.5	0.767912	0.07239
		330	36.5827	4.58331		47.993	4.06643																330	0.756859	0.071509
		332.5	36.118	4.57247		47.4308	3.83003																332.5	0.750129	0.067226
		335	36.0277	4.66891		47.1784	3.94784																335	0.754614	0.070303
		337.5	35.9642	4.85769		48.735	4.11711																337.5	0.732096	0.07427
		340	34.9428	4.59518		47.9242	3.94795																340	0.723802	0.073083
		342.5	34.2337	4.49454		47.4429	3.75481																342.5	0.712045	0.071293
		345	34.8554	4.66578		47.6084	3.787																345	0.721358	0.073488
		347.5	34.2565	4.52601		47.1646	3.94731																347.5	0.719376	0.070118
		350	34.0286	4.43623		47.4857	3.93154																350	0.719811	0.074028
		352.5	33.1656	4.14175		47.064	3.84938																352.5	0.708958	0.068822
		355	33.4944	4.38644		47.3416	3.80238																355	0.697883	0.065959
		357.5	32.6317	4.18255		46.5853	3.95194																357.5	0.701909	0.067656
		360	32.8744	4.31713		47.4524	4.01591																360	0.691833	0.069192
		362.5	31.4699	4.04849		48.6324	3.95185																362.5	0.640806	0.059874
		365	31.5016	4.0491		47.6019	4.09855																365	0.659929	0.062932
		367.5	29.9773	3.8468		47.5105	3.9859																367.5	0.628705	0.060561
		370	29.4926	3.71294		49.0292	3.87884																370	0.596888	0.05589
		372.5	29.7342	3.87119		49.8211	4.04975																372.5	0.593218	0.058633
		375	29.1796	3.80348		48.7991	4.03733																375	0.596493	0.061457
		377.5	28.3278	3.80446		49.1549	3.93347																377.5	0.565092	0.052684
		380	28.3519	3.524		48.7711	3.88265																380	0.575852	0.051429
		382.5	27.7029	3.59271		48.2609	3.95021																382.5	0.572211	0.056093
		385	27.2272	3.53749		48.2222	3.63583																385	0.555063	0.050278
		387.5	27.2892	3.42947		48.4433	3.93445																387.5	0.554761	0.047596
		390	26.2518	3.36229		49.1907	3.79095																390	0.526263	0.050374
		392.5	26.6358	3.40706		48.6329	4.11135																392.5	0.544768	0.050129
		395	26.0982	3.38458		49.1252	4.10111																395	0.530022	0.05212
		397.5	25.2214	3.13743		49.212	3.80011																397.5	0.506286	0.044264
		400	25.0926	3.28871		48.3177	3.76324																400	0.510943	0.045765
		402.5	24.1178	3.17964		48.5209	4.005																402.5	0.493786	0.046786
		405	23.6729	3.03624		48.325	3.96148																405	0.487264	0.044526
		407.5	23.0088	3.06884		48.7141	4.01591																407.5	0.46753	0.0437
		410	23.6047	3.24162		49.0327	3.97214																410	0.476617	0.046709
		412.5	22.8509	2.91257		48.4133	3.74275																412.5	0.465268	0.037053
		415	22.5943	2.98888		48.4798	4.01863																415	0.461003	0.040901
		417.5	22.103	3.05383		46.9825	3.78627																417.5	0.472213	0.05032
		420	22.5072	3.02253		46.7944	3.9379																420	0.478547	0.045024
		422.5	21.2541	2.83954		47.4794	4.13005																422.5	0.446057	0.041219
		425	21.3161	2.75073		47.7037	4.01114																425	0.447051	0.041211
		427.5	20.9784	2.69965		48.6656	3.9587																427.5	0.428359	0.038
		430	21.4017	2.75674		48.1384	4.12834																430	0.440368	0.034482
		432.5	20.7114	2.59004		48.9148	4.13073																432.5	0.424777	0.035998
		435	20.6908	2.54964		47.0031	3.85																435	0.441464	0.037577
		437.5	20.2017	2.63999		48.4024	3.95833																437.5	0.415561	0.037039
		440	19.9592	2.68385		48.0619	4.24841																440	0.415578	0.037911
		442.5	19.2686	2.46336		47.2483	4.00258																442.5	0.406123	0.033247
		445	19.6553	2.54172		47.5433	4.16504																445	0.414535	0.036849
		447.5	18.9013	2.47257		47.1551	4.10164																447.5	0.403226	0.034183
		450	18.9506	2.45639		47.4339	4.00576																450	0.399959	0.035612
		452.5	19.6233	2.57406		46.9498	4.14689																452.5	0.415594	0.031958
		455	18.6582	2.48662		48.1892	4.14475																455	0.384682	0.032059
		457.5	18.8486	2.39219		47.2549	4.12263																457.5	0.402083	0.033925
		460	18.8487	2.42929		47.3583	4.10316																460	0.397097	0.032423
		462.5	19.0828	2.46851		46.8932	3.96706																462.5	0.404897	0.033639
		465	18.4014	2.48014		46.7079	3.92196																465	0.393706	0.036199
		467.5	18.1861	2.35737		47.4329	4.09978																467.5	0.388026	0.036354
		470	18.1105	2.27027		48.0093	4.02083																470	0.377126	0.028969
		472.5	18.1944	2.17812		48.285	4.06482																472.5	0.377844	0.027527
		475	17.4759	2.3015		47.7176	4.10542																475	0.365516	0.032236
		477.5	17.8325	2.31468		47.9762	4.00858																477.5	0.370144	0.030267
		480	17.4123	2.36196		48.3264	4.0509																480	0.356031	0.029816
		482.5	17.333	2.17307		47.6891	4.00284																482.5	0.362673	0.02841
		485	17.7594	2.18146		47.5134	3.9482																485	0.37368	0.028927
		487.5	17.7293	2.23977		46.9988	4.15323																487.5	0.376276	0.02747
		490	17.7235	1.98997		47.7219	4.05562																490	0.373346	0.025899
		492.5	17.7305	2.14601		48.2074	3.98348																492.5	0.36579	0.025799
		495	17.7123	2.09679		48.2289	3.93482																495	0.366453	0.024613
		497.5	17.951	2.06803		46.9104	4.01094																497.5	0.386909	0.02787
		500	16.9146	1.96461		48.578	4.32118																500	0.349689	0.024793
		502.5	17.4407	2.03175		47.9945	4.1408																502.5	0.36746	0.02933
		505	17.4992	2.00941		48.8802	4.1973																505	0.360528	0.024865
		507.5	17.1195	1.76646		47.9375	4.08276																507.5	0.362123	0.024045
		510	16.9731	1.85965		47.6252	3.94739																510	0.359137	0.024848
		512.5	17.4921	1.96298		46.2306	4.16824																512.5	0.384355	0.026454
		515	16.6103	1.76305		46.537	4.00457																515	0.362812	0.022401
		517.5	16.4206	1.65057		47.2536	4.25721																517.5	0.356544	0.022324
		520	16.5869	1.6516		47.2049	4.06737																520	0.357896	0.020577
		522.5	17.0332	1.5755		47.6909	4.05838																522.5	0.363667	0.019082
		525	16.9453	1.64174		46.3691	3.95955																525	0.372491	0.022424
		527.5	17.0748	1.64715		46.7269	3.98083																527.5	0.37229	0.021404
		530	16.3114	1.67474		46.1479	3.89416																530	0.357464	0.022353
		532.5	16.7706	1.68305		45.9116	3.81168																532.5	0.368551	0.021122
		535	16.0919	1.55918		47.5542	3.93532																535	0.33965	0.016139
		537.5	15.9452	1.56964		47.0697	3.88422																537.5	0.342711	0.01958
		540	16.1322	1.59903		46.3039	4.09137																540	0.355508	0.021671
		542.5	16.718	1.49601		47.121	3.77164																542.5	0.359946	0.018092
		545	16.1958	1.53869		47.4426	3.88345																545	0.343868	0.017878
		547.5	15.7799	1.44001		48.8806	4.07329																547.5	0.328322	0.018025
		550	16.4653	1.55824		46.3686	3.90781																550	0.360599	0.019831
		552.5	15.7052	1.46348		47.2443	4.20755																552.5	0.340815	0.020119
		555	15.73	1.40985		46.5837	4.16123																555	0.347516	0.019579
		557.5	15.8326	1.45018		47.7421	4.08948																557.5	0.338539	0.018702
		560	15.3508	1.37918		47.393	4.16726																560	0.331128	0.017344
		562.5	15.5929	1.42212		46.3603	4.02697																562.5	0.342386	0.018364
		565	15.5587	1.40949		46.3556	3.96889																565	0.341986	0.016989
		567.5	15.4522	1.35843		47.7946	3.99261																567.5	0.328197	0.016734
		570	15.7473	1.35069		48.5932	4.07619																570	0.328905	0.0145
		572.5	15.6925	1.36272		48.5086	4.19972																572.5	0.328047	0.013717
		575	15.3787	1.30704		48.2874	4.19618																575	0.324835	0.015659
		577.5	15.4143	1.33347		47.863	4.09948																577.5	0.328499	0.016481
		580	15.0915	1.31389		48.3591	4.00077																580	0.317708	0.017248
		582.5	15.1146	1.32697		47.4931	3.98864																582.5	0.325094	0.017782
		585	15.3121	1.29764		48.7049	3.9846																585	0.318679	0.015136
		587.5	14.9717	1.18119		48.1814	3.81583																587.5	0.316373	0.014218
		590	14.974	1.30647		48.4019	4.01035																590	0.31617	0.017478
		592.5	14.8056	1.20414		47.3605	3.81223																592.5	0.317335	0.014611
		595	14.7504	1.17665		47.3192	3.95581																595	0.318528	0.015556
		597.5	15.2495	1.23317		47.2492	3.92746																597.5	0.329988	0.016008
		600	15.0949	1.14181		47.7082	4.11292																600	0.329645	0.018609
		602.5	15.0407	1.26437		47.4657	3.87836																602.5	0.323032	0.016267
		605	15.0978	1.15108		46.8181	4.03409																605	0.332208	0.015296
		607.5	15.1531	1.10099		48.6855	3.91324																607.5	0.319133	0.014325
		610	14.8825	1.26592		47.3778	3.9293																610	0.31967	0.016056
		612.5	14.1074	1.05851		47.1604	3.9845																612.5	0.310808	0.019019
		615	14.0556	1.18718		47.4231	3.75186																615	0.300001	0.015516
		617.5	14.3216	1.10758		48.4742	3.92496																617.5	0.301331	0.013492
		620	14.7729	1.13262		48.2224	4.00745																620	0.313904	0.015469
		622.5	14.6774	1.16833		47.2086	3.65608																622.5	0.315884	0.014581
		625	14.6589	1.14915		47.0585	3.91556																625	0.319456	0.016605
		627.5	15.4079	1.21035		48.3919	4.16787																627.5	0.326475	0.014742
		630	14.4667	1.05493		49.306	4.07636																630	0.301179	0.014615
		632.5	14.3761	1.15857		48.6204	4.16462																632.5	0.303627	0.01577
		635	15.198	1.12906		47.3341	3.91448																635	0.329733	0.014928
		637.5	14.5921	1.21174		48.5389	3.98797																637.5	0.30708	0.015828
		640	14.0316	1.15765		48.8764	4.1026																640	0.291715	0.013308
		642.5	14.2204	1.16382		49.3608	4.3061																642.5	0.294589	0.013722
		645	14.0886	1.12115		49.5066	4.20615																645	0.291372	0.013178
		647.5	14.7317	1.10002		49.1693	3.92209																647.5	0.305503	0.012378
		650	14.3034	1.1884		47.7304	4.10865																650	0.307975	0.016564
		652.5	14.7955	1.14752		49.22	4.18355																652.5	0.309866	0.016425
		655	14.4216	1.12397		48.7358	4																655	0.300481	0.013031
		657.5	14.6293	1.04416		47.3534	4.05926																657.5	0.320685	0.016852
		660	14.4456	1.09031		45.9888	3.70712																660	0.321415	0.015116
		662.5	14.3278	1.14482		46.6406	3.93102																662.5	0.315129	0.01606
		665	14.5305	1.02605		48.4194	3.97978																665	0.307336	0.012156
		667.5	14.5059	1.07821		47.7237	3.86409																667.5	0.311454	0.01344
		670	14.8767	1.04393		47.6752	3.77875																670	0.32197	0.016819
		672.5	14.9642	1.12962		48.3431	3.79194																672.5	0.316144	0.015207
		675	14.6357	1.11176		48.6916	3.81431																675	0.306621	0.014577
		677.5	14.1364	0.974057		48.5466	3.93036																677.5	0.299074	0.012788
		680	14.0567	1.03414		48.5831	4.25251																680	0.298526	0.014616
		682.5	13.5756	1.00136		49.0505	4.08759																682.5	0.284333	0.014176
		685	14.4067	1.11174		49.0076	3.70611																685	0.297553	0.012366
		687.5	14.2003	1.03874		49.2767	3.90369																687.5	0.294939	0.013358
		690	14.9506	1.09462		48.1279	3.83875																690	0.317432	0.013679
		692.5	104.654	8.26536		47.6271	3.78944																692.5	2.2139	0.084581
		695	135.334	11.0465		48.0006	3.62578																695	2.80574	0.088735
		697.5	140.61	11.4455		47.4471	3.62061																697.5	2.94721	0.100218
		700	142.526	12.1228		46.9182	3.89009																700	3.02829	0.089382
		702.5	142.972	12.0424		46.621	3.81276																702.5	3.0574	0.09015
		705	143.477	12.4857		47.2782	3.85364																705	3.00952	0.102458
		707.5	143.934	12.4752		46.8829	3.95258																707.5	3.05896	0.091468
		710	144.441	12.5606		46.7802	3.91162																710	3.074	0.096998
		712.5	145.875	12.5701		47.0141	3.87718																712.5	3.08942	0.111157
		715	147.766	13.0936		48.3626	4.03512																715	3.03299	0.097071
		717.5	146.329	12.6359		48.0189	3.98058																717.5	3.03036	0.096929
		720	147.09	12.904		48.2268	4.14722																720	3.03579	0.099673
		722.5	146.535	12.954		48.3771	3.83403																722.5	2.98447	0.090862
		725	146.424	12.9348		47.741	3.91791																725	3.03425	0.097004
		727.5	147.322	12.6537		47.7834	3.96047																727.5	3.06604	0.093801
		730	148.507	12.6999		48.1018	3.91586																730	3.0703	0.109109
		732.5	149.059	12.9519		48.501	3.92085																732.5	3.03961	0.07935
		735	146.84	12.596		48.0321	3.80362																735	3.025	0.092015
		737.5	149.484	12.8004		48.0126	3.97495																737.5	3.09303	0.082296
		740	149.576	12.9925		47.779	3.86856																740	3.10166	0.098436
		742.5	147.681	12.8927		47.9412	3.81541																742.5	3.04445	0.088597
		745	148.002	12.7648		49.6585	3.94092																745	2.94521	0.091927
		747.5	148.701	12.9661		48.7948	4.049																747.5	3.02621	0.096942
		750	150.134	13.0181		49.6118	4.0977																750	3.00029	0.088566
		752.5	150.203	12.6892		48.5998	4.07216																752.5	3.07846	0.095171
		755	147.633	12.6629		48.4639	3.99335																755	3.02129	0.078942
		757.5	148.375	12.8188		48.3806	3.98077																757.5	3.04371	0.09086
		760	149.345	12.9911		47.7581	3.82695																760	3.08967	0.095574
		762.5	148.9	12.7638		49.5832	4.22328																762.5	2.98974	0.084415
		765	150.491	12.9926		49.7211	4.12351																765	3.00153	0.084929
		767.5	150.354	12.8079		49.4049	4.10153																767.5	3.02094	0.092755
		770	149.145	13.0562		48.9529	3.90892																770	3.00663	0.105566
		772.5	150.437	12.975		49.0949	4.0078																772.5	3.03839	0.090323
		775	148.718	12.8355		50.1566	4.18872																775	2.94106	0.08296
		777.5	150.761	12.7921		50.3308	4.29183																777.5	2.98199	0.088423
		780	149.394	12.8243		51.3182	4.41622																780	2.89694	0.095868
		782.5	149.488	12.792		49.6042	4.18944																782.5	3.00187	0.091188
		785	149.912	13.0757		50.2402	4.19156																785	2.9594	0.092167
		787.5	149.265	13.2492		50.6013	4.17837																787.5	2.91786	0.097552
		790	147.849	12.6285		50.892	4.23453																790	2.88214	0.081019
		792.5	148.369	12.7389		51.4472	4.38705																792.5	2.86843	0.087661
		795	146.921	12.7454		50.9041	4.27611																795	2.86679	0.094966
		797.5	146.234	12.8094		49.7987	4.07931																797.5	2.90813	0.099619
		800	145.912	12.3889		50.1164	4.28352																800	2.90167	0.085739
		802.5	146.668	12.5788		49.6973	4.03199																802.5	2.92939	0.093609
		805	144.088	12.3439		49.0311	4.23345																805	2.92947	0.090874
		807.5	143.347	12.625		49.7959	4.48152																807.5	2.87451	0.096163
		810	144.542	12.5214		50.8856	4.33934																810	2.82394	0.085831
		812.5	142.305	12.3598		48.7324	4.49153																812.5	2.93198	0.104886
		815	111.388	11.0008		49.0254	4.52044																815	2.29835	0.159337
		817.5	65.6711	11.1038		49.6767	4.37569																817.5	1.34038	0.207954
		820	45.5227	10.2218		49.3764	4.3081																820	0.928203	0.18587
		822.5	36.1412	9.46564		50.9521	4.20696																822.5	0.715662	0.166384
		825	31.1905	8.99156		51.5023	4.37912																825	0.603309	0.146411
		827.5	28.714	8.78841		50.4338	4.23192																827.5	0.577843	0.156591
		830	26.9586	8.5562		51.1724	4.54731																830	0.526992	0.14093
		832.5	25.4789	7.97503		49.8751	4.36714																832.5	0.511033	0.138153
		835	24.1005	7.76713		50.6993	4.26438																835	0.471589	0.131972
		837.5	23.8976	7.68132		50.1593	4.3647																837.5	0.47056	0.126428
		840	22.7013	7.27602		49.7017	4.28246																840	0.4517	0.125602
		842.5	23.0315	6.99794		50.4988	4.58723																842.5	0.447504	0.109804
		845	22.3671	6.82082		51.1379	4.39845																845	0.433091	0.112923
		847.5	22.3959	6.40155		50.5828	4.42775																847.5	0.437394	0.103469
		850	22.2257	6.56819		50.1971	4.3587																850	0.441677	0.114971
		852.5	21.7333	6.24801		50.9169	4.33713																852.5	0.415594	0.098124
		855	20.9278	5.8197		50.2587	4.43841																855	0.42042	0.105609
		857.5	21.4123	5.94284		49.7077	4.39926																857.5	0.418647	0.089478
		860	21.0376	5.54783		49.6866	4.27328																860	0.411619	0.085227
		862.5	20.3379	5.47852		49.8226	4.35083																862.5	0.401121	0.087742
		865	20.2634	5.34702		48.0064	4.18689																865	0.417405	0.089886
		867.5	20.1253	5.21595		50.3273	4.25394																867.5	0.393688	0.085678
		870	20.4104	4.96614		51.0565	4.34979																870	0.393046	0.073368
		872.5	20.1399	4.76355		50.0006	4.3785																872.5	0.39772	0.074561
		875	19.8829	4.65041		50.8193	4.30139																875	0.386275	0.072047
		877.5	19.2583	4.56726		51.1063	4.50168																877.5	0.372985	0.070615
		880	19.8947	4.35104		50.8791	4.5325																880	0.387885	0.062844
		882.5	19.2262	4.28549		50.0737	4.37339																882.5	0.37948	0.067378
		885	19.4031	4.07332		49.7968	4.33494																885	0.390094	0.066574
		887.5	18.7674	4.32528		49.3104	4.32392																887.5	0.375033	0.068405
		890	19.063	3.97505		49.9942	4.50977																890	0.380183	0.061633
		892.5	17.9437	3.69079		48.5706	4.524																892.5	0.368188	0.057496
		895	18.2457	3.54192		49.1674	4.4161																895	0.369936	0.053051
		897.5	19.0102	3.57055		48.2655	4.24836																897.5	0.39753	0.061206
		900	17.9657	3.56247		49.4917	4.39917																900	0.363428	0.055204
		902.5	17.9824	3.23579		49.2316	4.42477																902.5	0.366225	0.048449
		905	18.4044	3.4498		48.8645	4.27475																905	0.371763	0.049696
		907.5	17.9356	3.30978		49.2248	4.35293																907.5	0.362639	0.048769
		910	18.2191	3.19457		48.3791	4.14796																910	0.377836	0.046899
		912.5	17.7747	3.08725		48.9866	4.12736																912.5	0.361079	0.046285
		915	17.9456	3.11066		48.0409	4.48811																915	0.378335	0.044477
		917.5	17.848	2.76431		46.9542	4.25414																917.5	0.381043	0.037648
		920	17.5961	2.87371		47.4977	4.07804																920	0.370373	0.043537
		922.5	17.9952	2.69134		48.5299	4.38779																922.5	0.376464	0.039534
		925	17.8343	2.80591		47.9615	3.98806																925	0.37498	0.042407
		927.5	17.4678	2.77577		49.3959	4.11551																927.5	0.353565	0.038999
		930	17.2479	2.57388		49.0731	4.28916																930	0.35382	0.03541
		932.5	16.9689	2.50316		48.9049	4.16087																932.5	0.345869	0.032588
		935	17.4614	2.55241		47.9989	4.06029																935	0.368681	0.03887
		937.5	17.5825	2.54359		48.4378	4.12188																937.5	0.365007	0.03757
		940	16.9638	2.50103		47.775	4.15574																940	0.357512	0.037222
		942.5	16.5482	2.32775		48.2983	3.94719																942.5	0.341759	0.032004
		945	16.5246	2.35102		49.189	3.98587																945	0.336419	0.033781
		947.5	16.6637	2.32592		48.6956	3.93743																947.5	0.34508	0.034332
		950	16.4083	2.207		47.7316	3.83993																950	0.344651	0.030929
		952.5	16.4856	2.27228		48.2812	4.03152																952.5	0.344365	0.035196
		955	16.6766	2.10473		48.3081	3.76978																955	0.347053	0.029498
		957.5	16.4672	2.17768		47.7459	3.82932																957.5	0.346975	0.031374
		960	16.4253	2.0655		48.3327	3.99185																960	0.341615	0.02675
		962.5	16.1521	1.95338		47.7371	3.7976																962.5	0.341426	0.02765
		965	15.8839	2.05984		47.7953	3.92143																965	0.335428	0.030219
		967.5	16.7139	2.06108		46.9709	3.75468																967.5	0.359274	0.031916
		970	16.1124	2.08746		46.8805	3.83155																970	0.346844	0.030745
		972.5	16.1179	2.07724		47.2648	3.72707																972.5	0.346944	0.033949
		975	15.7502	1.96032		47.5265	3.72179																975	0.334778	0.03007
		977.5	15.9409	1.96547		47.7908	3.99502																977.5	0.338206	0.027773
		980	16.0233	1.90079		46.7201	3.85557																980	0.349172	0.027548
		982.5	15.5642	1.85754		46.3956	3.77246																982.5	0.338548	0.026622
		985	16.0474	1.85747		47.729	3.71807																985	0.340978	0.027141
		987.5	15.5356	1.7291		47.5528	3.48657																987.5	0.330389	0.026845
		990	15.8041	1.81047		47.4399	3.76005																990	0.335452	0.024374
		992.5	15.7218	1.76077		47.1249	3.62962																992.5	0.336946	0.025622
		995	15.2011	1.65615		47.3086	3.74681																995	0.326876	0.025438
		997.5	15.7265	1.59373		46.1718	3.47315																997.5	0.344561	0.022395
		1000	15.1959	1.73133		46.6111	3.58237																1000	0.329538	0.027037
		1002.5	15.9417	1.75411		45.6013	3.5209																1002.5	0.35352	0.025402
		1005	15.3146	1.57657		46.5331	3.61757																1005	0.334895	0.023945
		1007.5	15.6452	1.60187		47.3282	3.68537																1007.5	0.334934	0.022162
		1010	15.3704	1.57081		45.9789	3.58621																1010	0.340276	0.024505
		1012.5	15.3734	1.54547		47.4174	3.62739																1012.5	0.327718	0.02194
		1015	15.5787	1.51173		48.1243	3.61279																1015	0.328237	0.020367
		1017.5	15.4118	1.37375		48.5428	3.60147																1017.5	0.323917	0.021052
		1020	15.1851	1.44056		47.8881	3.85033																1020	0.324959	0.022648
		1022.5	14.9062	1.41891		47.6858	3.61428																1022.5	0.318653	0.022424
		1025	15.3374	1.43748		48.5592	3.65496																1025	0.319699	0.01953
		1027.5	15.623	1.40536		47.3078	3.70707																1027.5	0.33546	0.019305
		1030	15.5791	1.33605		46.7843	3.69759																1030	0.341982	0.020976
		1032.5	15.2421	1.33868		46.2904	3.55316																1032.5	0.33398	0.01875
		1035	15.829	1.48209		46.841	3.84947																1035	0.347262	0.023594
		1037.5	15.6656	1.32543		46.1603	3.75264																1037.5	0.349947	0.021893
		1040	15.7185	1.3164		47.1186	3.78068																1040	0.342651	0.019877
		1042.5	14.8889	1.28778		47.5838	3.7167																1042.5	0.318709	0.017456
		1045	15.3678	1.30124		47.6777	3.63077																1045	0.326099	0.016406
		1047.5	14.9094	1.2332		48.1652	3.80873																1047.5	0.316615	0.017948
		1050	14.7159	1.29705		48.4654	3.83577																1050	0.3091	0.017897
		1052.5	15.2492	1.31845		48.3603	3.90284																1052.5	0.322293	0.018712
		1055	15.1386	1.15475		48.3392	3.90289																1055	0.322263	0.016942
		1057.5	15.3424	1.24188		48.1495	3.83497																1057.5	0.325447	0.016225
		1060	15.5356	1.23954		47.2336	3.70979																1060	0.334881	0.015796
		1062.5	15.6171	1.24257		48.932	4.00907																1062.5	0.328415	0.017198
		1065	15.347	1.22201		48.4736	3.80066																1065	0.323499	0.017173
		1067.5	15.5692	1.26574		48.0194	3.63087																1067.5	0.33043	0.018184

## Sheet: Figure 1 Supp 1 Panel D
	Fig. 1-fig supp 1D
	Quantification of IBA-1 expression in Salsa6f and non-transgenic lines
	Non-transgenic	Salsa6f	Non-transgenic + LPS	Salsa6f + LPS
	5.53161	7.73412	7.0339	2.86543			Tukey's multiple comparisons test	Mean Diff.	95.00% CI of diff.	Below threshold?	Summary	Adjusted P Value
	5.8932	8.75559	6.86396	5.41176			Non-transgenic vs. Salsa6f	-0.4323	-2.611 to 1.746	No	ns	0.9479
	4.50813	6.84062	4.8153	2.63014			Non-transgenic vs. Non-transgenic + LPS	2.129	-0.04882 to 4.308	No	ns	0.0571
	4.89961	6.15164	5.18365	3.42803			Non-transgenic vs. Salsa6f + LPS	2.526	0.3479 to 4.704	Yes	*	0.0183
	9.23034	8.04809	3.8529	5.26657			Salsa6f vs. Non-transgenic + LPS	2.562	0.3835 to 4.740	Yes	*	0.0165
	10.0228	7.65009	4.21089	4.97887			Salsa6f vs. Salsa6f + LPS	2.958	0.7803 to 5.137	Yes	**	0.0048
	8.31802	6.26602	4.14255	6.35159			Non-transgenic + LPS vs. Salsa6f + LPS	0.3967	-1.781 to 2.575	No	ns	0.959
	9.2234	9.63976	4.48923	6.48601

## Sheet: Figure 1 Supp 1 Panel E
		Fig. 1-fig supp 1E
		iPSC-microglia differentiation yield in Salsa6f and non-transgenic lines
		Salsa6f	Non-transgenic			Table Analyzed	Differentiation Yield
		1.13	1.12			Column B	Non-transgenic
		1.256	1.235			vs.	vs.
		0.978	0.897			Column A	Salsa6f
						Unpaired t test
						P value	0.7845
						P value summary	ns
						Significantly different (P < 0.05)?	No
						One- or two-tailed P value?	Two-tailed
						t, df	t=0.2924, df=4
						How big is the difference?
						Mean of column A	1.121
						Mean of column B	1.084
						Difference between means (B - A) ± SEM	-0.03733 ± 0.1277
						95% confidence interval	-0.3918 to 0.3172
						R squared (eta squared)	0.02093
						F test to compare variances
						F, DFn, Dfd	1.524, 2, 2
						P value	0.7924
						P value summary	ns
						Significantly different (P < 0.05)?	No
						Data analyzed
						Sample size, column A	3
						Sample size, column B	3

## Sheet: Figure 1 Supp 1 Panels F-G
			Fig. 1-fig supp 1F																						Fig. 1-fig supp 1G
			Synaptosome phagocytosis in Salsa6f and non-transgenic iPSC-microglia (time course)
																									Synaptosome phagocytosis in Salsa6f and non-transgenic iPSC-microglia (quantification)
			Time (hours)	Salsa6f no synaptosomes			Non-transgenic no synaptosomes			Salsa6f			Non-transgenic			Salsa6f + Cytochalasin D			Non-transgenic + Cytochalasin D							Salsa6f			Non-transgenic
				Mean	SEM	N	Mean	SEM	N	Mean	SEM	N	Mean	SEM	N	Mean	SEM	N	Mean	SEM	N				Synaptosomes	0.094182	0.004592	3	0.089109	0.002246	3
																									Beta-amyloid	0.037023	0.002062	3	0.036737	0.001941	3
			0	0	0	3	0	0	3	0	0	3	0	0	3	0	0	3	0	0	3				Zymosan A	0.037221	0.00402	3	0.033591	0.003704	3
			0.25	0	0	3	0	0	3	0	0	3	0	0	3	0	0	3	0	0	3				S. aureus	0.027641	0.006148	3	0.044014	0.009015	3
			1.25	0	0	3	0	0	3	0.001563	0.000263	3	0.000718	0.000114	3	0	0	3	0	0	3
			2.25	0	0	3	0	0	3	0.007552	0.001122	3	0.007461	0.000767	3	0.000108	9.75e-05	3	0	0	3
			3	0	0	3	0	0	3	0.015191	0.001696	3	0.013748	0.000875	3	0.000181	6.66e-05	3	6.98e-05	3.75e-05	3					Discovery?	P value	Mean of Salsa6f	Mean of Non-transgenic	Difference	SE of difference	t ratio	df	q value
			4	0	0	3	0	0	3	0.025599	0.002356	3	0.022581	0.001054	3	0.000184	6.2e-05	3	0.000123	5.06e-05	3				Synaptosomes	No	0.377176	0.09418	0.08911	0.005073	0.005112	0.9924	4	0.731194
			5	0	0	3	0	0	3	0.037537	0.003031	3	0.03301	0.001185	3	0.000194	6.48e-05	3	0.000173	6.96e-05	3				Beta-amyloid	No	0.924415	0.03702	0.03674	0.000286	0.002832	0.101	4	0.933659
			6	0	0	3	0	0	3	0.047733	0.003076	3	0.043747	0.001805	3	0.000244	7.36e-05	3	0.000206	9.38e-05	3				Zymosan A	No	0.542966	0.03722	0.03359	0.00363	0.005466	0.6641	4	0.731194
			7	0	0	3	0	0	3	0.056163	0.003253	3	0.05158	0.002089	3	0.000326	0.00012	3	0.000245	0.000104	3				S. aureus	No	0.207882	0.02764	0.04401	-0.01637	0.01091	1.5	4	0.731194
			8	0	0	3	0	0	3	0.065721	0.003844	3	0.060326	0.001939	3	0.000359	0.000119	3	0.000253	0.000102	3
			9	0	0	3	0	0	3	0.069986	0.003755	3	0.068953	0.001597	3	0.000339	0.000112	3	0.000275	0.000115	3
			10	0	0	3	0	0	3	0.07809	0.003786	3	0.075973	0.0017	3	0.000322	0.000107	3	0.000273	0.000105	3
			11	0	0	3	0	0	3	0.085614	0.00447	3	0.08198	0.002342	3	0.000266	0.0001	3	0.000245	9.15e-05	3
			12	0	0	3	0	0	3	0.094182	0.004592	3	0.089109	0.002246	3	0.00022	9.02e-05	3	0.000235	9.58e-05	3
			13	0	0	3	0	0	3	0.106598	0.005138	3	0.095906	0.002991	3	0.000199	8.43e-05	3	0.000217	8.54e-05	3
			14	0	0	3	0	0	3	0.113533	0.004892	3	0.103846	0.003294	3	0.000208	8.69e-05	3	0.000223	9.16e-05	3
			15	0	0	3	0	0	3	0.122053	0.004497	3	0.109225	0.003374	3	0.000214	9.17e-05	3	0.000205	9.04e-05	3
			16	0	0	3	0	0	3	0.129277	0.004248	3	0.117748	0.003771	3	0.000223	9.36e-05	3	0.000168	7.77e-05	3
			17	0	0	3	0	0	3	0.135104	0.003831	3	0.121278	0.003723	3	0.000211	8.62e-05	3	0.000191	9.96e-05	3
			18	0	0	3	0	0	3	0.139119	0.003275	3	0.126413	0.004309	3	0.00022	8.98e-05	3	0.000173	9.79e-05	3
			19	0	0	3	0	0	3	0.147745	0.00459	3	0.131569	0.003605	3	0.000214	9.44e-05	3	0.000188	0.000111	3
			20	0	0	3	0	0	3	0.146979	0.003573	3	0.131219	0.003791	3	0.000226	9.8e-05	3	0.000173	0.000109	3
			21	0	0	3	0	0	3	0.154184	0.003721	3	0.131385	0.003381	3	0.000222	0.000109	3	0.000159	0.0001	3
			22	0	0	3	0	0	3	0.155421	0.003824	3	0.133082	0.003263	3	0.000202	0.000106	3	0.000171	0.000103	3
			23	0	0	3	0	0	3	0.159239	0.004063	3	0.13378	0.003439	3	0.000204	0.000108	3	0.000149	6.37e-05	3
			24	0	0	3	0	0	3	0.162346	0.003995	3	0.136401	0.003672	3	0.000215	0.00011	3	0.000112	4.95e-05	3

## Sheet: Figure 1 Supp 2 
		Figure 1-fig supp 2B
		Baseline subtracted cyt.Ca2+ levels in WT and TREM2 KO cells 5 min after application of 2.5 mM ADP, 2.5 mM ATP, and 10 mM UTP.
		WT_ADP_Ca5-BLsub	WT_ATP_Ca5-BLsub	WT_UTP_Ca5-BLsub		KO_ADP_Ca5-BLsub	KO_ATP_Ca5-BLsub	KO_UTP_Ca5-BLsub			One way ANOVA with Multiple Comparisons
		0	0	0		0.922399	0.25272	0			Number of families	1
		0.115729	0	0		0.105292	0	0			Number of comparisons per family	15
		0	0	0		0.119008	0.243697	0			Alpha	0.05
		0.080881	0.116042	0.00443987		0.528997	0.0611574	0
		0.155128	0.00609556	0.00985502		0.141974	0.0275303	0.0113976			Tukey's multiple comparisons test	Mean Diff.	95% CI of diff.	Significant?	Summary
		0.024842	0	0.00383818		0.775981	0.0908311	0.0228454
		0.040548	0.017987	0		0.520246	0.0562683	0			WT_ADP_Ca5-BLsub vs. WT_ATP_Ca5-BLsub	0.1025	0.05621 to 0.1487	Yes	****
		0	0.00148643	0		0.362351	0.0188569	0			WT_ADP_Ca5-BLsub vs. WT_UTP_Ca5-BLsub	0.154	0.1125 to 0.1955	Yes	****
		0.056363	0.134359	0.0636284		0.099345	0.174466	0			WT_ADP_Ca5-BLsub vs. KO_ADP_Ca5-BLsub	-0.09811	-0.1394 to -0.05681	Yes	****
		0	0.242977	0		0.645617	0.104169	0			WT_ADP_Ca5-BLsub vs. KO_ATP_Ca5-BLsub	0.07148	0.02411 to 0.1189	Yes	***
		0.187084	0.390222	0.0261181		0.4736	0.152434	0			WT_ADP_Ca5-BLsub vs. KO_UTP_Ca5-BLsub	0.1621	0.1156 to 0.2085	Yes	****
		0.760541	0.0240395	0		0.759153	0.28083	0			WT_ATP_Ca5-BLsub vs. WT_UTP_Ca5-BLsub	0.05151	0.005959 to 0.09706	Yes	*
		0.042014	0.024319	0.0171034		0.641251	0.209275	0.00569499			WT_ATP_Ca5-BLsub vs. KO_ADP_Ca5-BLsub	-0.2006	-0.2460 to -0.1552	Yes	****
		0.023857	0.00708277	0		0.734004	0	0.0910405			WT_ATP_Ca5-BLsub vs. KO_ATP_Ca5-BLsub	-0.03097	-0.08194 to 0.02000	No	ns
		0.351317	0	0		0.493604	0.0743278	0.0383539			WT_ATP_Ca5-BLsub vs. KO_UTP_Ca5-BLsub	0.0596	0.009473 to 0.1097	Yes	**
		0.517586	0	0.0092228		0.647524	0.120938	0			WT_UTP_Ca5-BLsub vs. KO_ADP_Ca5-BLsub	-0.2521	-0.2926 to -0.2115	Yes	****
		0.474274	0.0908831	0		0.36878	0.14305	0			WT_UTP_Ca5-BLsub vs. KO_ATP_Ca5-BLsub	-0.08248	-0.1292 to -0.03578	Yes	****
		0.739868	0	0		0.149342	0.261495	0.0442613			WT_UTP_Ca5-BLsub vs. KO_UTP_Ca5-BLsub	0.008093	-0.03769 to 0.05388	No	ns
		0.291789	0	0		0.768035	0.106826	0.0648326			KO_ADP_Ca5-BLsub vs. KO_ATP_Ca5-BLsub	0.1696	0.1231 to 0.2161	Yes	****
		0.012151	0.160258	0.0166769		1.02954	0.0340519	0			KO_ADP_Ca5-BLsub vs. KO_UTP_Ca5-BLsub	0.2602	0.2146 to 0.3058	Yes	****
		0.376332	0.246762	0		1.12061	0.320135	0.045601			KO_ATP_Ca5-BLsub vs. KO_UTP_Ca5-BLsub	0.09058	0.03940 to 0.1418	Yes	****
		0.874258	0.0650728	0.00827766		0.907213	0.457233	0
		0.093332	0.0103188	0		0.414535	0.116662	0
		0.070556	0	0.0388755		0.722511	0.345927	0			Test details	Mean 1	Mean 2	Mean Diff.	SE of diff.	n1	n2	q	DF
		0.019186	0.27379	0		0.78457	0.0624892	0
		0.895911	0.102805	0		0.793284	0.0760883	0			WT_ADP_Ca5-BLsub vs. WT_ATP_Ca5-BLsub	0.1851	0.08267	0.1025	0.0162	250	179	8.943	1307
		0.037194	0.520764	0.017048		0.114842	0.0243977	0			WT_ADP_Ca5-BLsub vs. WT_UTP_Ca5-BLsub	0.1851	0.03116	0.154	0.01454	250	269	14.98	1307
		1.07408	0.0669922	0.0100737		0.157063	0	0.00417568			WT_ADP_Ca5-BLsub vs. KO_ADP_Ca5-BLsub	0.1851	0.2832	-0.09811	0.01447	250	274	9.587	1307
		0.668144	0.0359914	0		0.129864	0.295857	0			WT_ADP_Ca5-BLsub vs. KO_ATP_Ca5-BLsub	0.1851	0.1136	0.07148	0.0166	250	165	6.091	1307
		1.16054	0.0680023	0.0133899		0.765711	0.41615	0			WT_ADP_Ca5-BLsub vs. KO_UTP_Ca5-BLsub	0.1851	0.02307	0.1621	0.01628	250	176	14.08	1307
		0.507084	0.0686942	0.104997		0.0728	0.138984	0			WT_ATP_Ca5-BLsub vs. WT_UTP_Ca5-BLsub	0.08267	0.03116	0.05151	0.01596	179	269	4.564	1307
		0.970541	0.047407	0.0193308		1.07193	0.0767654	0			WT_ATP_Ca5-BLsub vs. KO_ADP_Ca5-BLsub	0.08267	0.2832	-0.2006	0.0159	179	274	17.84	1307
		0.357194	0	0.0142521		0.247111	0.314109	0.01099			WT_ATP_Ca5-BLsub vs. KO_ATP_Ca5-BLsub	0.08267	0.1136	-0.03097	0.01786	179	165	2.453	1307
		0.795541	0.0579396	0		0.260012	0.129406	0.0211854			WT_ATP_Ca5-BLsub vs. KO_UTP_Ca5-BLsub	0.08267	0.02307	0.0596	0.01757	179	176	4.799	1307
		0.587084	0	0.0946081		0.556663	0.0528778	0			WT_UTP_Ca5-BLsub vs. KO_ADP_Ca5-BLsub	0.03116	0.2832	-0.2521	0.0142	269	274	25.1	1307
		0.072194	0.0258699	0		0.933699	0.122635	0			WT_UTP_Ca5-BLsub vs. KO_ATP_Ca5-BLsub	0.03116	0.1136	-0.08248	0.01636	269	165	7.129	1307
		0.397084	0.0653259	0.0359717		0.698437	0.0623955	0.00794167			WT_UTP_Ca5-BLsub vs. KO_UTP_Ca5-BLsub	0.03116	0.02307	0.008093	0.01604	269	176	0.7134	1307
		0.277084	0.00470563	0.00545381		0.557598	0.0535446	0.0168463			KO_ADP_Ca5-BLsub vs. KO_ATP_Ca5-BLsub	0.2832	0.1136	0.1696	0.01631	274	165	14.71	1307
		0.222084	0.0833729	0		1.03099	0	0.0679479			KO_ADP_Ca5-BLsub vs. KO_UTP_Ca5-BLsub	0.2832	0.02307	0.2602	0.01598	274	176	23.02	1307
		0.437194	0.0207359	0		0.422809	0.0938581	0.216559			KO_ATP_Ca5-BLsub vs. KO_UTP_Ca5-BLsub	0.1136	0.02307	0.09058	0.01793	165	176	7.143	1307
		0.850541	0.427327	0		0.207833	0.0113289	0
		0.247194	0.0413643	0.015467		0.09909	0.0628119	0
		0.127194	0	0.00236119		0.072274	0.20326	0.0138295
		1.08054	0	0		0.27006	0.0327401	0
		0.027117	0.246554	0		0.069119	0.0624043	0
		0.265556	0.224082	0		0.537005	0	0
		0.076826	0	0.0642814		0.759328	0.00896624	0.0103357
		0.571304	0.0236925	0		0.194203	0.341617	0
		0.084387	0.32881	0		0.062983	0.219951	0
		0.434036	0.827639	0.0383713		0.563119	0.179166	0.00905296
		0.652298	0.0227966	0		0.264207	0.12724	0
		0.092803	0.0114731	0		0.080008	0.0655596	0
		0.048863	0.204845	0.00639971		0.145026	0.0336243	0
		0.13843	0.585713	0.0120794		0.365704	0.0502494	0
		0.521365	0.185602	0		0.543366	0.59779	0
		0.048748	0.447497	0		0.081721	0.0280924	0
		0.039771	0.396849	0		0.235287	0.255516	0.00736085
		0.032357	0	0		0.037565	0.208917	0
		0.217843	0.0939494	0.0705907		0.248027	0.0660584	0.0219047
		0.086419	0	0		0.626765	0.0835478	0.0440602
		0.363855	0.540363	0.00378925		0.347047	0.0367916	0
		0.261617	0	0.0098957		0.137194	0.0938078	0
		0.091585	0.0389123	0		0.172146	0.116238	0
		0.024594	0.0373054	0.00491091		0.100734	0.0692919	0.00585759
		0.014201	0.107325	0.0059578		0.096391	0.111187	0.336706
		0.207088	0.0789891	0.0859863		0.155247	0.112573	0
		0.415203	0.195243	0.0437952		0.425077	0.063544	0.00114188
		0.067259	0.246472	0		0.192875	0.104308	0
		0.053556	0.0143629	0.0105411		0.151745	0.144994	0.0214087
		0	0.0355921	0.0109942		0.152624	0.104881	0
		0.040257	0.0216385	0		0.303512	0	0
		0.581953	0.0135345	0.0280527		0.147739	0.148845	0
		0.163588	0.0838629	0		0.066305	0	0
		0.039085	0.0297241	0.0472076		0.051805	0.0728903	0.0519912
		0.03601	0.0450037	6.4783e-05		0.115652	0.0921202	0
		0.022979	0.0913706	0		0.097697	0.132586	0.00756543
		0.560786	0.0117779	0		0.120354	0.0208556	0.0461036
		0.051899	0.047878	0		0.140315	0.0537071	0.0211913
		0.062893	0.0514855	0.0172918		0.387233	0.190022	0.0251287
		0.062792	0.128974	0		0.068398	0.0817206	0.0074402
		0.02955	0.0433758	0		0.140134	0.0690165	0.0202892
		0.363332	0.0294997	0.0810573		0.042445	0.110099	0.00972418
		0.027836	0.0163515	0		0.292607	0.0935665	0.0182236
		0.040306	0.430511	0.00385495		0.167182	0.0364753	0.0110194
		0.03379	0.182801	0		0.23412	0.164294	0.0518898
		0.032992	0.0928394	0.0357695		0.356831	0.0614271	0.0157394
		0.377916	0.0435702	0.427986		0.60418	0.0343768	0.006135
		0.351258	0.057315	0.0261298		0.107601	0.0555173	0.00892142
		0.118987	0.0315374	0.0619584		0.343639	0.295911	0.00440347
		0.702868	0	0.0275769		0.304233	0.423893	0.0336139
		0.504984	0.036462	0.0974361		0.110715	0.0299558	0.011586
		0.04049	0.0705035	0.10129		0.112665	0.088748	0.0238441
		0.830065	0.473826	0.03574		0.303912	0.144624	0.0201863
		0.133898	0.0229894	0.0114738		0.203359	0.220725	0.0336013
		0.04818	0.139057	0.0414847		0.12669	0.131855	0.296956
		0.035431	0.049214	0.00270287		0.129442	0.223248	0.0232297
		0.086625	0.0283629	0.0688456		0.428526	0.0616039	0.055918
		0.038698	0.0515058	0.0221597		0.086928	0.0506337	0.0617555
		0.559803	0.0182174	0.0893491		0.04419	0.086479	0
		0.513742	0.0798968	0.03638		0.644181	0.137506	0.0144304
		0.354219	0.0327135	0.0641088		0.446154	0.168433	0.0429084
		0.07599	0.0168109	0.0427667		0.156032	0.0306443	0.0239314
		0.409529	0.0294658	0.0351911		0.05405	0.733044	0.044004
		0.032861	0	0.0406892		0.305272	0.057849	0.00618696
		0.30164	0.017892	0.106996		0.419767	0.0248937	0.019178
		0.023107	0.0233374	0.0810512		0.579314	0.0734409	0.0458729
		0.215651	0.108461	0.0921727		0.053715	0.00092664	0.0150246
		0.341405	0.0276279	0.0671325		0.208244	0.141145	0.0154656
		0.011835	0.0336283	0.0751502		0.236427	0.0387494	0.00386745
		0.523259	0.100684	0.0159996		0.22158	0.12985	0.0033028
		0.056622	0.0228092	0.0563721		0.105193	0.30624	0.0230511
		0.071842	0.0702929	0.0601365		0.078941	0.17048	0.00462758
		0.128296	0.0344483	0.0264692		0.153373	0.0593673	0.014329
		0.127765	0.0405081	0.0189437		0.30341	0.0184459	0.0219578
		0.039603	0.0360995	0.0218217		0.158852	0.116138	0.0653191
		0.040255	0.0225194	0.0276144		0	0.11381	0.0346451
		0.346155	0.0225346	0.048487		0.215996	0.104206	0.016722
		0.351126	0.0164055	0.0275098		0.26876	0.116969	0.0212576
		0.028908	0.0103844	0.0941549		0.125255	0.0942879	0.0337767
		0.051489	0.0039034	0.0366785		0.195028	0.107761	0.00686757
		0.623202	0.00421063	0.0395987		0.252246	0.182606	0.0349667
		0.103529	0.065101	0.0236335		0.235401	0.0614353	0.0181928
		0.347244	0.028048	0.00971634		0.182184	0.0920095	0.0512413
		0.100442	0.0280042	0.00662801		0.171603	0.0352998	0.017915
		0.038084	0.0456051	0.0615349		0.313942	0.0385872	0
		0.03097	0.641472	0.0129477		0.144075	0.0622639	0.0499717
		0.320553	0.038436	0.02201		0.308508	0.0530509	0.00708799
		0	0.0303686	0.0943337		0.280572	0.04432	0.0309679
		0.042696	0.0202212	0.0707314		0.511963	0.0323404	0.0661322
		0.060362	0.0202832	0.0391772		0.069021	0.14684	0.0318436
		0.221627	0.120758	0.0169116		0	0.0556834	0
		0.051106	0.409762	0.0106893		0	0.0254097	0.106435
		0.172312	0.0501493	0.0183133		0.740702	0.040937	0.024865
		0.657736	0.0328885	0.0213768		0.07879	0.0420796	0.0345008
		0.092185	0.0465617	0.0126336		0.32272	0.126675	0.0216542
		0	0.0399613	0.0298509		0.323641	0.0882708	0.0248547
		0.205432	0	0.0707399		0.460518	0.0239246	0.0282736
		0.006901	0.0452601	0.0644202		0.191726	0.0836263	0.0351564
		0.034275	0.0668135	0.0155268		0.151432	0.144607	0.0241772
		0.079088	0.0519156	0.0494913		0.34443	0.0654113	0.0570646
		0.012659	0.0462423	0.0279385		0.150043	0.0792371	0.0136357
		0.358533	0.0292623	0.0326343		0.139805	0.0459818	0.046363
		0.26909	0.0590037	0.0363424		0.054772	0.0593913	0.0395684
		0.126353	0.0262392	0.00634238		0.170197	0.0423181	0
		0.276581	0.0902628	0.00327764		0.143232	0.00181858	0.010306
		0.106997	0.0635986	0.0548546		0.243495	0.105609	0.0102804
		0.035218	0.0556844	0.0518193		0.402028	0.0166567	0.0120327
		0.029016	0.0530342	0.00810089		0.183415	0.0384083	0.0274942
		0.010349	0.0255279	0.0505745		0.62657	0.102974	0.0587138
		0	0.0298074	0.0489729		0.087502	0.214682	0.0108851
		0.21933	0.0162856	0.072303		0.099267	0.17739	0.0200103
		0.166277	0.0618247	0.0555166		0.062234	0.061612	0.0161296
		0.094812	0.0344011	0.0608684		0.108144	0.0240593	0.0218448
		0.049115	0.0414088	0.0389213		0.120767	0.159645	0.0620938
		0.135006	0.00942229	0.0526842		0.135779	0.148647	0.0149877
		0.061067	0.0391536	0.0141995		0.283213	0.125974	0.0268522
		0.109811	0.0360054	0.0964869		0.687415	0.102654	0.0396053
		0.035435	0.00988093	0.0727636		0.287498	0.0898175	0.0405098
		0.36971	0.060555	0.0426005		0.056251	0.0785233	0.0283653
		0.005668	0.0469183	0.0279652		0.159337	0.0347428	0
		0	0.0117218	0.0793897		0.068776	0.0395486	0.0480841
		0.083463	0.00327522	0.0203238		0.077004	0.0655383	0.0102449
		0.073668	0.029186	0.0573598		0.157549	0.0481688	0.00040593
		0.044402	0	0.010076		0.175007	0.159267	0.0179412
		0.167168	0.103302	0		0.161127	0.194479	0.0397261
		0.07259	0.0482809	0.0549642		0.206218		0.0121336
		0.111255	0.018692	0.121234		0.237055		0.00046827
		0.049886	0.00905414	0.13318		0.325157		0.0672606
		0.211336	0.00456744	0.00909856		0.474507		0
		0.101917	0.0248182	0		1.03883		0.015529
		0.162559	0.154117	0.0285984		0.848889		0.0340138
		0	0.0374416	0.080438		0.156178		0.0330376
		0.06092	0.0507116	0		0.161094		0.0230933
		0.218625	0.0839753	0.0206336		0.340849		0.00327237
		0.01272	0.0191449	0.0002601		0.092066		0.0362802
		0.02467	0.0283652	0.0275012		0.034726		0.0686211
		0.018877	0.0204978	0.051006		0.256584
		0	0.0373644	0.0763738		0.459783
		0.029617	0.0565572	0.0608365		0.072354
		0.068229		0		0.136163
		0.088041		0.0398008		0.121396
		0.376769		0.040625		0.106587
		0.132595		0.081716		0.040063
		0.415866		0.0254666		0
		0.060192		0.0435422		0.099234
		0.182399		0.0629699		0.148192
		0.058188		0.0671975		0.437226
		0		0.0381257		0.259357
		0.175383		0.0336647		0.248158
		0.010768		0.0538824		0.413148
		0.685848		0.0494121		0.180004
		0.031069		0.0626302		0.236216
		0.405983		0.0106689		0.411502
		0.011833		0.0416972		0.434925
		1.57893		0		0.621709
		0		0		0.302776
		0.044224		0		0.224624
		0.045461		0.0127215		0.184289
		0.102403		0.00960783		0.131934
		0.782138		0.0576521		0.272148
		0.371448		0.012458		0.145653
		0.251933		0.00669013		0.51176
		0.176392		0		0.470426
		0.009992		0.0235733		0.317293
		0.020169		0.0174961		0.023088
		0.088405		0.0407109		0.466013
		0.23488		0.0327873		0.152871
		0		0.0386236		0.535621
		0.023013		0.0821554		0.369614
		0.621614		0.0233757		0.409646
		0.003901		0.109197		0.37643
		0.021605		0.0266002		0.154466
		0.049012		0.0570218		0.291938
		0.01664		0.0320123		0.276658
		0.021212		0		0.338158
		0		0.0192923		0.136785
		0.013807		0.0308057		0.05521
		0.005628		0.0626493		0.127696
		0.012512		0.055369		0.338362
		0.016609		0.0152461		0.265581
		0.008288		0.0105759		0.165351
		0.028536		0		0.123919
		0.015882		0.0110843		0.279564
		0.023965		0.0290715		0.087299
		0.010526		0.0222548		0.076488
		0.032446		0.050881		0.157071
		0.00238		0.0546821		0.194585
		0.017006		0.0217034		0.166746
		0.026706		0.0552548		0.372153
		0		0.051142		0.151682
		0.198928		0.0456383		0.385645
		0.000342		0.0347238		0.071103
		0.049241		0.0522265		0.493675
		0.018726		0.0177827		0.084896
		0.014133		0.0254753		0.691282
		0.338412		0.0337756		0.07728
		0.014847		0.0227335		0.461781
		0.017245		0.0245864		0.379269
		0		0		0.084727
		0.036837		0.0370764		0.153983
		0.006912		0.0111108		0.155026
		0.039169		0.0529011		0.052783
		0.008352		0.0221324		0.581116
		0.020269		0.0140276		0.340626
		0.033708		0.037809		0.209471
		0.006943		0.0252059		0.237845
		0.013652		0.0472118		0.323518
		0.013064		0.0409821		0.408555
		0.007269		0.00985166		0.221705
		0.026038		0		0.500481
				0.0414501		0.246245
				0.0409569		0.302802
				0.0393357		0.098865
				0.0295808		0.130165
				0.00298382		0.09221
				0.0445754		0.413987
				0.0184863		0.111073
				0.0039179		0.375723
				0.0491721		0.334571
				0.0169326		0.076064
				0.0485628		0.170623
				0.0121535		0.13422
				0.0260071		0.138257
				0.0366965		0.021399
				0.0204113		0.296864
				0.029179		0.114149
				0.00628081		0.0534
				0.0264036		0.236247
				0.0308298		0.175857
						0.061944
						0.064032
						0.134011
						0.132644
						0.591276
