# Supplementary material for: TREM2 regulates purinergic receptor-mediated calcium signaling and motility in human iPSC-derived microglia
Source: eLife. 2022 Feb 22;11:e73021. doi: 10.7554/eLife.73021 (PMC8906810; doi:10.7554/eLife.73021)
Supplement: Figure 2—source data 1. — In this dataset, the results of ADP stimulation in 0 Ca2+, dose curve of ADP in wild type (WT) and TREM2 KO, P2Y receptor expression, expression of key calcium signaling proteins, and inhibition of P2Y receptors are included. [file elife-73021-fig2-data1.xlsx]

## Sheet: Fig 2 Panel B
			Figure 2B									Figure 2B
			AverageTrace: cyt.Ca2+ response to ADP in Ca2+ free buffer									Summary of baseline subtratced Peak Ca2+ response to ADP
			X-axis: Time (s), Y-axis: Fluo-4/Fura-Red Ratio; SEM: std.error of mean									each data point is from a single cell
				WT			TREM2 KO					WT	TREM2 KO
			Time(s)	Mean	SEM		Mean	SEM				column A	column B
			0	0.17188	0.00336171		0.199953	0.0077593				0.205923	1.46758		Column B	KO
			3	0.174288	0.00361078		0.19969	0.00607956				0.03375	1.57697		vs.	vs.
			6	0.173529	0.0039699		0.20094	0.00493252				0.041328	1.57479		Column A	WT
			9	0.175041	0.00409959		0.1977	0.00449513				0.047089	1.60175
			12	0.174852	0.0039568		0.196967	0.00469304				0.034736	1.81333		Mann Whitney test
			15	0.172922	0.0034843		0.198809	0.00381711				0.076249	1.74642		P value	< 0.0001
			18	0.171349	0.00358133		0.200364	0.00393048				0.039376	1.89902		Exact or approximate P value?	Approximate
			21	0.171935	0.00314811		0.197626	0.0037747				0.048381	1.72384		P value summary	****
			24	0.171762	0.00329254		0.198309	0.00354597				0.402501	1.57919		Significantly different? (P < 0.05)	Yes
			27	0.179242	0.00685043		0.195531	0.00375211				0.569236	1.73102		One- or two-tailed P value?	Two-tailed
			30	0.177158	0.00564295		0.19571	0.00365743				1.28408	1.9122		Sum of ranks in column A,B	44374 , 108807
			33	0.173094	0.00397038		0.202039	0.00404701				1.1816	1.57824		Mann-Whitney U	9394
			36	0.17313	0.00328134		0.202078	0.00462424				1.64861	1.8892
			39	0.173258	0.00339452		0.2012	0.00427653				1.23731	1.25531		Difference between medians
			42	0.174436	0.00290144		0.202711	0.00417731				0.842341	1.59353		Median of column A	0.8432
			45	0.173717	0.00303656		0.203485	0.00478454				1.2527	1.80801		Median of column B	1.475
			48	0.175197	0.00330186		0.202175	0.00449099				1.62566	1.53116		Difference: Actual	0.6318
			51	0.176915	0.00308756		0.202777	0.00491668				1.24922	1.71462		Difference: Hodges-Lehmann	0.6634
			54	0.173718	0.00310281		0.207018	0.00580895				1.09188	1.38838
			57	0.176616	0.00349781		0.20257	0.00572269				1.58655	1.75605
			60	0.179987	0.00437448		0.203169	0.00604331				1.10265	1.39478
			63	0.179985	0.00535979		0.206264	0.00567208				1.53154	1.75243
			66	0.180961	0.00377191		0.206917	0.00582515				1.50351	1.95454
			69	0.179519	0.00352049		0.206103	0.00555969				1.07929	1.5188
			72	0.175452	0.0031082		0.205152	0.00537212				1.86473	1.80196
			75	0.177541	0.00331539		0.204827	0.0062014				1.87616	1.52038
			78	0.176391	0.00350673		0.8528	0.0665141				1.63943	1.82074
			81	0.231774	0.0233048		1.62431	0.0208562				1.81889	1.51634
			84	0.520004	0.0540465		1.50535	0.0189693				1.46371	1.14111
			87	0.831422	0.0605489		1.34299	0.0200261				1.54183	1.61094
			90	0.83014	0.0503023		1.1777	0.0211557				1.26658	1.52655
			93	0.856789	0.0444095		1.03663	0.0161816				1.4771	1.53608
			96	0.845107	0.0414114		0.937952	0.0171113				0.827193	1.62999
			99	0.748427	0.0361885		0.873676	0.0174883				0.780289	1.61654
			102	0.606746	0.0287791		0.78944	0.0168999				0.778056	1.77477
			105	0.492112	0.0240148		0.665647	0.0144493				1.2634	1.98656
			108	0.398587	0.0193038		0.557974	0.0146131				0.960766	1.76817
			111	0.327337	0.0168438		0.461175	0.0146777				0.7592	1.76742
			114	0.274203	0.0137034		0.387494	0.0142634				1.61163	1.53615
			117	0.23504	0.0120325		0.328388	0.012841				1.59195	1.47817
			120	0.211759	0.00999352		0.280918	0.0111698				1.17106	1.5492
			123	0.19295	0.00891981		0.241836	0.00898873				1.43626	1.50143
			126	0.182137	0.00887643		0.213019	0.00701018				1.17775	1.81104
			129	0.167835	0.00750433		0.195485	0.00565194				0.97053	1.22205
			132	0.164818	0.00744449		0.181236	0.00446278				1.11362	1.45532
			135	0.159918	0.00557563		0.174452	0.00377903				1.29106	1.71994
			138	0.155237	0.0049399		0.17157	0.00316425				1.23279	1.53049
			141	0.157617	0.00729659		0.166774	0.00312164				0.717558	1.80519
			144	0.159698	0.00776265		0.164627	0.00331191				0.804717	1.92673
			147	0.154299	0.00729333		0.165035	0.00300912				0.85233	1.75638
			150	0.15778	0.00865649		0.162621	0.00304657				0.857321	1.54003
			153	0.156379	0.00631989		0.161936	0.00300645				0.725524	1.76578
			156	0.157168	0.00718457		0.163747	0.00290809				1.23963	1.78819
			159	0.156465	0.00714258		0.163174	0.00323281				1.31295	1.87487
			162	0.156998	0.00747292		0.163522	0.00331786				1.57409	1.6458
			165	0.155296	0.00599369		0.165379	0.00316592				0.930539	1.90476
			168	0.153973	0.00613129		0.164406	0.00278298				1.14377	1.85536
			171	0.151738	0.00582909		0.169229	0.00307887				1.02527	1.36034
			174	0.154447	0.0062083		0.164915	0.00318926				1.45814	1.66855
			177	0.153544	0.00529142		0.165207	0.00320026				0.844979	1.67072
			180	0.149427	0.00425898		0.16248	0.00290117				0.917357	1.6133
			183	0.14909	0.00409761		0.161804	0.00284944				0.017469	1.56618
			186	0.15328	0.00464421		0.16156	0.00284048				0.021166	1.46564
			189	0.150592	0.00444984		0.162644	0.00290656				0.046167	1.64983
			192	0.1494	0.00415412		0.164929	0.00304581				0.492947	1.40589
			195	0.148145	0.00398504		0.160752	0.0027836				0.030876	1.47495
			198	0.148777	0.00405831		0.162575	0.00295722				0.020302	1.74452
			201	0.147834	0.0034247		0.161442	0.00321549				0.021706	1.83685
			204	0.147784	0.00309947		0.161754	0.00290154				0.041064	1.669
			207	0.148449	0.00287644		0.164634	0.00304417				0.04153	2.01895
			210	0.146311	0.00282284		0.16199	0.00292165				0.017006	1.55118
			213	0.146996	0.00266962		0.161955	0.00299943				0.037443	1.80275
			216	0.147034	0.00258538		0.162759	0.00263711				0.0256	1.88164
			219	0.146703	0.00280548		0.161847	0.00287132				0.020243	1.23644
			222	0.147058	0.00272766		0.160954	0.00253044				0.016044	1.57156
			225	0.146241	0.00375529		0.160964	0.00278804				0.022954	1.64102
			228	0.153647	0.00866905		0.16489	0.0025386				0.009418	1.52963
			231	0.151552	0.00726647		0.163727	0.00268656				0.019239	1.64753
			234	0.154734	0.00772506		0.162251	0.00276244				0.062043	1.67802
			237	0.152109	0.00666538		0.165062	0.00271703				0.023463	1.77289
			240	0.151801	0.00531078		0.163257	0.00275301				0.040838	1.58609
			243	0.150206	0.00455555		0.161324	0.00260005				0.024398	1.85613
			246	0.150317	0.00413028		0.163252	0.00258214				0.040451	1.58016
			249	0.149288	0.00348587		0.160607	0.00240799				0.01708	1.61668
			252	0.156594	0.00877186		0.162259	0.00273411				0.02108	1.60938
			255	0.151017	0.00420425		0.164595	0.00266995				0.013087	1.7009
			258	0.151134	0.00281633		0.163778	0.0027023				0.772366	1.57325
			261	0.14888	0.0025876		0.163171	0.00263661				0.858785	1.64071
			264	0.147803	0.00254817		0.16076	0.00268855				0.813448	1.6525
			267	0.14943	0.00259657		0.159575	0.00290908				1.18324	1.56417
			270	0.14712	0.00248747		0.160264	0.00264818				1.2268	1.60707
			273	0.146619	0.00256591		0.163753	0.00259299				0.678482	1.56404
			276	0.149169	0.00291967		0.161931	0.00259251				1.41153	1.4387
			279	0.149312	0.00262876		0.163073	0.00278206				1.35096	1.72172
			282	0.148764	0.00263274		0.16312	0.00288039				1.44724	1.56777
			285	0.149803	0.00302787		0.164008	0.00275829				0.944013	1.60237
			288	0.149729	0.00273316		0.158682	0.00263352				1.01926	1.62996
			291	0.150673	0.00274036		0.161955	0.00251673				0.663922	1.58566
			294	0.150578	0.00296524		0.160951	0.00260288				1.67657	1.80607
			297	0.149114	0.00263647		0.161016	0.00259438				0.850407	1.79211
			300	0.149181	0.00287118		0.161725	0.00249849				1.71205	1.60872
												1.24537	1.80032
												1.27679	1.72086
												1.19922	1.49613
												1.20985	1.69758
												1.2888	1.47153
												0.813041	1.59128
												0.943547	1.64508
												0.978483	1.58424
												0.634917	1.47916
												1.12792	1.59309
												1.10688	1.52009
												0.532401	1.90008
												1.12333	1.661
												1.17762	1.29657
												1.11276	1.34637
												1.04563	1.5466
												1.42041	1.42597
												1.33634	1.51276
												1.02763	1.45138
												1.09789	1.57141
												1.05226	1.55487
												0.650576	1.50066
												1.58734	1.40821
												1.4687	1.48186
												0.902872	1.31096
												1.27484	1.42867
												0.047467	1.1145
												1.31029	1.3797
												1.00054	1.3903
												1.15393	1.61128
												1.01333	1.56982
												1.12635	1.46563
												0.98778	1.45587
												1.04269	1.49608
												1.16737	1.47377
												1.18828	1.53797
												1.44737	1.52634
												0.604154	1.56921
												0.035307	1.37438
												0.766633	1.59236
												1.23051	1.43317
												1.1651	1.54409
												0.873002	1.50224
												0.508846	1.32609
												0.844062	1.4429
												1.32626	1.1896
												1.13798	1.32459
												1.46163	1.55165
												1.18512	1.66607
												1.05703	1.68685
												1.29452	1.16713
												0.760782	1.33925
												1.01578	1.14951
												1.07954	1.37599
												0.934728	1.48193
												1.20593	1.68484
												1.19459	1.53256
												1.2002	1.63979
												0.043177	1.48303
												1.37864	0.915805
												0.020447	1.20044
												0.871464	1.57561
												0.095633	1.31098
												1.31573	1.3982
												0.8724	1.56439
												1.14478	1.40237
												0.346906	1.30164
												0.031592	1.35371
												0.016221	1.3812
												0.023111	1.58251
												0.987549	1.43288
												1.40518	1.36914
												1.45354	1.4755
												0.0909	1.21776
												0.560772	1.41904
												0.877033	1.39112
												1.18395	1.50809
												0.034921	1.34302
												0.742497	1.32765
												0.842028	0.847911
												1.02116	1.31516
												0.021161	1.35726
												0.915747	1.59099
												1.08199	1.36533
												1.11363	1.70169
												0.97031	1.36675
												0.818592	1.13777
												1.12406	1.36388
												0.157681	1.16318
												0.661639	1.46549
												1.03749	1.1761
												1.45805	0.15797
												0.947547	0.953178
												1.07235	1.29978
												1.02016	1.6115
												0.908149	-0.12941
												0.020137	1.43415
												1.24206	1.2669
												0.013323	0.023296
												0.963389	1.57962
												0.016898	1.62113
												0.03773	1.36936
												0.110318	1.62157
												0.004736	0.032231
												1.0142	1.23159
												0.019735	1.42637
												0.032666	1.12262
												0.56305	1.25987
												0.017229	1.31956
												0.024026	1.24141
												0.635119	1.51345
												0.978576	1.18273
												0.868838	1.36296
												0.033468	1.38801
												0.988356	1.27221
												0.075849	1.36108
												0.026877	1.41844
												0.033939	0.746241
												0.02961	0.981479
												0.813073	1.55353
												0.898262	1.12546
												0.718685	1.20032
												0.002622	1.27105
												0.211485	1.27816
												0.041899	1.11758
												0.025887	1.51757
												0.512771	1.3075
												0.018475	1.34114
												0.028773	1.63634
												0.012374	1.16159
												0.018534	0.126685
												0.019851	1.63025
												0.030313	1.01313
												0.022849	1.36753
												0.002157	1.31717
												0.017187	0.029105
												0.017729	1.02427
												0.062462	1.64859
												0.023553	1.31219
												0.040524	0.05316
												0.02256	1.39428
												0.017851	1.40904
												0.008177	1.4611
												0.16829	1.26032
												0.013433	1.34567
												0.017253	1.19416
												0.025941	1.28169
												0.02816	1.10919
												0.015389	1.24231
												0.015983	1.51592
												0.029026	1.29312
												0.019153	1.13729
												0.019972	0.915438
												0.004687	1.34154
												0.014619	1.23265
												0.012814	1.06161
												0.021206	1.32618
												1.34616	1.16226
												0.012583	1.12153
												0.337471	1.36536
												0.021496	0.136048
												0.018065	1.26651
												0.403515	1.1303
													1.502
													1.04228
													0.800556
													1.45368
													1.01828
													1.60064
													1.35228
													1.22962
													1.49812
													1.29749
													1.35118
													1.27714
													1.38575
													1.10529
													0.786174
													1.07978
													1.32141
													1.4629
													1.35345
													1.31434
													1.16025
													1.07813
													0.98474
													1.35886
													1.02384

## Sheet: Fig 2 Panels C-E
		Figure 2C, D and E: Cytosolic Ca2+ Dose-response curves to ADP (in Ca2+ free buffer)
		Figure 2C: Peak Ca2+ response													Figure 2D: Percent responding cells											Figure 2E: Peak Ca2+ response (in responding cells ONLY)
		Each data point is Fluo-4/Fura-Red Ratio at peak ADP Ca2+ response in Ca2+ free buffer													Each data point is "percent responders" calculated as % of cells that have Peak Ca2+ response											Each data point is Fluo-4/Fura-Red Ratio at peak ADP Ca2+ response in Ca2+ free buffer
		Mean: Average peak Ca2+ (baseline subtracted); SEM: standard error of mean; N= number of cells													≥ 50% higher than the baseline (Ca2+ level before ADP addition)											Mean: Average peak Ca2+ (baseline subtracted); SEM: standard error of mean; N= number of cells
					WT				TREM2 KO									% Responders											WT				TREM2 KO
		ADP (mM)	log ADP (mM)		Mean	SEM	N		Mean	SEM	N				ADP (mM)	log ADP (mM)		WT	TREM2 KO							ADP (mM)	log ADP (mM)		Mean	SEM	N		Mean	SEM	N
		0.001	-3		0.081121	0.022144	91		0.020707	0.010795	79				0.001	-3		10.98	2.53165							0.001	-3		0.758345	0.082167	12		0.738967	0	2
		0.002	-2.69897		0.037045	0.007235	192		0.030357	0.00674	232				0.002	-2.69897		4.16667	2.15517							0.002	-2.69897		0.654711	0.062741	8		0.863374	0.151323	5
		0.01	-2		0.03963	0.00663	317		0.405583	0.031855	280				0.01	-2		5.99369	38.2143							0.01	-2		0.623625	0.056312	19		1.22164	0.033861	107
		0.02	-1.69897		0.233181	0.025394	283		0.856723	0.039656	292				0.02	-1.69897		24.0283	68.8356							0.02	-1.69897		1.1093	0.048135	68		1.43802	0.032187	201
		0.1	-1		0.34455	0.023095	474		1.19729	0.017458	468				0.1	-1		36.2869	96.1539							0.1	-1		1.09792	0.034989	172		1.4398	0.01506	450
		1	0		0.702047	0.034686	264		1.42508	0.019293	289				1	0		65.9091	97.9239							1	0		1.23889	0.027552	174		1.67858	0.015656	283
		5	0.69897		1.01053	0.023666	226		1.37211	0.021286	84				5	0.69897		95.5752	100							5	0.69897		1.19544	0.020475	216		1.54132	0.021836	84
		10	1		1.00467	0.027117	369		1.43339	0.021406	232				10	1		86.7209	99.1379							10	1		1.31986	0.022322	320		1.65164	0.020551	230
		100	2		1.32849	0.025575	195		1.47515	0.01982	153				100	2		97.4359	100							100	2		1.55166	0.022403	190		1.66936	0.13496	153

## Sheet: Fig 2 Panel F
		Figure 2F
		RNA normalized read counts of P2RY12/13 expression from bulk RNA-sequencing
		P2RY12			P2RY13
		WT	TREM2 KO		WT	TREM2 KO
		0.92366	2.62591		0.902197	2.06527			log2(FC)	p-value
		1.0402	2.81288		1.01985	2.24894		P2RY12	1.38964	1.27e-140
		1.00778	2.45398		0.964015	1.93421		P2RY13	1.04835	2.7e-77
		1.02836	2.62891		1.11394	2.04646

## Sheet: Fig 2 Panel H
			Figure 2H (traces, left 2 panels)
																		Figure 2H (bar graph, right panel)
			Effects of PSB 0739 (10mM) + MRS 2211 (10mM) on ADP (1 mM) Ca2+ response in 0mM Ca2+ buffer
			Solvent control: DMSO															Summary of baseline subtratced Peak Ca2+ response to ADP
			X-axis: Time (s), Y-axis: G/R Ratio (Salsa6f); SEM: std.error of mean															each data point is from a single cell
				WT (control)			WT (PSB + MRS)			TREM2 KO (control)			TREM2 KO (PSB + MRS)										Inh= PSB + MRS
			Time(s)	Mean	SEM		Mean	SEM		Mean	SEM		Mean	SEM				WT(ADP)	WT(ADP)Inh.	KO(ADP)	KO(ADP)Inh.		KO= TREM2 KO
			0	0.158468	0.003216		0.181891	0.004185		0.164793	0.002071		0.16365	0.002686				0.007503	0.018764	1.36069	0.006536
			2	0.157893	0.003028		0.180548	0.003862		0.164737	0.001999		0.163671	0.002727				1.01831	0.003018	1.11732	0.003851
			4	0.157315	0.002871		0.178839	0.00356		0.163426	0.001944		0.163626	0.002731				0.527849	0	1.26265	0.002923
			6	0.156435	0.003044		0.179916	0.003979		0.162709	0.001841		0.162983	0.002724				1.1957	0.000295	1.00686	0.004521
			8	0.155081	0.003233		0.178792	0.004085		0.162327	0.00171		0.161886	0.002727				0.313678	0.002994	1.03514	0.007481
			10	0.154968	0.003061		0.17874	0.004538		0.161869	0.001711		0.161272	0.002732				0.827122	0	1.06981	0.002102
			12	0.155337	0.003091		0.178986	0.004554		0.16196	0.001749		0.161117	0.002714				0.656972	0.008885	1.01261	0.002458
			14	0.156456	0.003		0.18095	0.004396		0.161289	0.001842		0.160744	0.002708				0.933226	0.006465	1.35821	0.007783
			16	0.15619	0.003094		0.18221	0.004311		0.16161	0.001891		0.160404	0.002715				0.880803	0.009062	0.983165	0.003542
			18	0.156001	0.003054		0.182075	0.003885		0.161694	0.001948		0.159489	0.002718				1.15739	0.009622	1.33835	0.007503
			20	0.157911	0.004396		0.179964	0.003665		0.161906	0.0019		0.159206	0.00275				1.25015	0	1.11578	0.001898
			22	0.160853	0.006019		0.179829	0.003501		0.161432	0.001891		0.158837	0.002833				1.07667	0	1.44533	0.007749
			24	0.163635	0.007354		0.17848	0.003618		0.160856	0.001759		0.159012	0.002836				0.68793	0.001557	1.27747	0.012932
			26	0.162939	0.006843		0.177634	0.003646		0.159843	0.001681		0.158696	0.002794				0.883324	0	1.30558	0.0101
			28	0.163106	0.006228		0.17613	0.00379		0.157979	0.001799		0.158805	0.002735				1.08373	0	1.06889	0.007184
			30	0.161859	0.00567		0.177768	0.003838		0.156638	0.001793		0.158363	0.002791				1.15441	0	0.959796	0.005345
			32	0.161583	0.0048		0.179284	0.00378		0.157279	0.001782		0.158636	0.002646				1.21773	0.003631	1.18249	0.004528
			34	0.159738	0.004057		0.179455	0.003791		0.157348	0.0017		0.158655	0.002616				0.639478	0.008219	0.036767	0.007153
			36	0.158965	0.003594		0.177637	0.003627		0.158235	0.001707		0.159068	0.002585				1.15247	0.021583	1.42617	0.011612
			38	0.15769	0.003429		0.177064	0.003618		0.157444	0.001775		0.15927	0.002654				0.990596	0	0.703903	0.005074
			40	0.156963	0.003484		0.176248	0.003645		0.157574	0.001717		0.158733	0.002629				1.19169	0.002364	0.568054	6.91e-05
			42	0.15555	0.003459		0.175577	0.003506		0.156197	0.001745		0.157989	0.002631				0.727703	0.011014	1.45969	0.006789
			44	0.156213	0.003365		0.176406	0.003653		0.155041	0.001777		0.157731	0.002714				0.011931	0	0.426446	0.009381
			46	0.155988	0.003255		0.176306	0.003485		0.154438	0.001859		0.157765	0.002648				0.782466	0.002288	1.32349	0.009615
			48	0.156532	0.003261		0.176763	0.003401		0.1541	0.001873		0.157837	0.002559				1.41469	0.000652	1.28551	0.00544
			50	0.156339	0.003251		0.174359	0.00336		0.153626	0.001889		0.157956	0.002494				1.3584	0.021849	1.53661	0.001982
			52	0.15465	0.003235		0.173643	0.003159		0.153516	0.001779		0.157854	0.002585				0.009328	0	1.39833	0.008999
			54	0.15544	0.003266		0.173237	0.00327		0.153407	0.001841		0.157206	0.002514				1.36069	0.013102	1.00851	0.002295
			56	0.156307	0.003174		0.172348	0.003283		0.1541	0.00187		0.156138	0.002472				1.41059	0.007824	1.05673	0.004364
			58	0.158555	0.003357		0.171669	0.003101		0.155725	0.001911		0.154938	0.002425				1.28677	0.005135	1.3288	0.013755
			60	0.157489	0.003429		0.170687	0.003085		0.155321	0.001965		0.155013	0.002468				0.917747	0	1.20983	0.014358
			62	0.156687	0.003277		0.171143	0.003048		0.154547	0.001822		0.15573	0.002601				0.009791	0.004665	1.22887	0.018136
			64	0.156218	0.003064		0.172903	0.003258		0.15286	0.00177		0.157346	0.00263				0.867711	0	1.40936	0.003628
			66	0.1556	0.003196		0.171576	0.002975		0.155123	0.00351		0.158151	0.002666				0.002587	0.006102	1.413	0.000886
			68	0.154241	0.003142		0.170958	0.002678		0.156851	0.004885		0.157574	0.002477				1.16353	0.003022	1.06511	0.013655
			70	0.152499	0.003106		0.168053	0.002531		0.157895	0.005319		0.156271	0.002467				0.767846	0.01247	0.894095	0.009473
			72	0.152496	0.003045		0.168832	0.002615		0.155537	0.002698		0.154761	0.00242				1.5791	0.000594	1.11604	0.006581
			74	0.153053	0.003199		0.167631	0.002565		0.153648	0.001838		0.154203	0.002463				1.27426	0.004854	0.002687	0.008068
			76	0.153338	0.003401		0.168237	0.002725		0.151727	0.001676		0.154205	0.002493				0.88926	0	1.41601	0.001736
			78	0.153203	0.003357		0.1671	0.002757		0.150882	0.001715		0.153769	0.002465				0.439341	0	1.28958	0.001768
			80	0.157124	0.005406		0.168714	0.002853		0.149778	0.001741		0.154172	0.002534					0.000862	1.6454	0.007915
			82	0.160283	0.007414		0.168423	0.002587		0.150232	0.001793		0.153578	0.002548					0	1.44854	0.004284
			84	0.162247	0.009408		0.169807	0.002664		0.151458	0.001794		0.154057	0.002621					0.005584	1.09457	0.006772
			86	0.1596	0.007961		0.168703	0.002757		0.152401	0.0019		0.153088	0.002554					0.006401	1.39726	0.005831
			88	0.156244	0.007156		0.16855	0.003071		0.152096	0.00185		0.153039	0.002435					0.012473	1.081	0.013171
			90	0.154211	0.005894		0.166965	0.002893		0.151225	0.001807		0.152775	0.002394					0	0.934568	0.008755
			92	0.152431	0.004507		0.167093	0.002913		0.149912	0.001731		0.153058	0.002461					0.004146	1.3844	0.004621
			94	0.153703	0.003638		0.167343	0.002658		0.149388	0.001777		0.153012	0.002523					0.01141	0.006847	0.010426
			96	0.152415	0.003285		0.167603	0.002807		0.148782	0.001692		0.153634	0.002549						1.22133	0.015794
			98	0.151458	0.003289		0.164083	0.002855		0.148555	0.001746		0.153669	0.002418						1.19309	0.003589
		0Ca + ADP	100	0.150444	0.003195		0.162272	0.002926		0.148321	0.001725		0.153687	0.002405						1.43705	0.004587
			102	0.150468	0.003129		0.160596	0.002834		0.148952	0.001852		0.152741	0.002383						1.08586	0.001205
			104	0.149918	0.003046		0.159645	0.002716		0.150169	0.001777		0.153078	0.002469						1.26503	0.005603
			106	0.230235	0.025322		0.158497	0.00276		0.151017	0.001824		0.153026	0.00248						0.71179	0.001194
			108	0.415755	0.053698		0.157977	0.002816		0.181844	0.008289		0.153626	0.002426						1.17952	0.006156
			110	0.66049	0.080326		0.157858	0.002793		0.413042	0.030435		0.152875	0.002402						1.25835	0.003462
			112	0.78883	0.08727		0.156618	0.002629		0.751975	0.04616		0.152782	0.002374						1.2536	0.014818
			114	0.774784	0.07663		0.155617	0.002402		1.08146	0.051569		0.153284	0.002446						1.25382	0.000223
			116	0.680124	0.063017		0.155011	0.002225		1.1607	0.040343		0.153793	0.002499						1.1602	0.001866
			118	0.675452	0.060252		0.156116	0.002341		1.05208	0.032736		0.153811	0.002506						1.00436	0.012883
			120	0.742144	0.064903		0.156417	0.002449		0.853034	0.029471		0.153273	0.002425						1.14537	0.003903
			122	0.795391	0.064712		0.156406	0.002592		0.681344	0.027894		0.152566	0.002354						1.22844	0.00595
			124	0.724129	0.054174		0.156324	0.002614		0.581504	0.026394		0.152257	0.002281						0.976934	0.009514
			126	0.567818	0.042121		0.156699	0.002552		0.523483	0.026196		0.151676	0.002328						1.30929
			128	0.437399	0.035747		0.157304	0.002694		0.479387	0.02543		0.152129	0.002368						1.38641
			130	0.35432	0.037099		0.157446	0.002701		0.423949	0.021826		0.152644	0.002362						1.31013
			132	0.336175	0.039094		0.157777	0.002868		0.381412	0.020404		0.151879	0.002326						1.0753
			134	0.328417	0.033755		0.156939	0.002537		0.348334	0.02048		0.152195	0.002316						0.586956
			136	0.318738	0.035352		0.157173	0.002596		0.331586	0.021319		0.152708	0.002391						0.017201
			138	0.286087	0.03015		0.155802	0.002428		0.312777	0.020302		0.154288	0.00242						1.25993
			140	0.245108	0.022006		0.156553	0.002553		0.297663	0.019352		0.153934	0.002406						1.48667
			142	0.222058	0.020199		0.156387	0.002475		0.287346	0.01912		0.153009	0.002381						1.19445
			144	0.214137	0.017909		0.157205	0.00255		0.280436	0.018706		0.151588	0.002433						1.08184
			146	0.204544	0.017837		0.157102	0.002592		0.270674	0.018048		0.151082	0.002417						1.4289
			148	0.197124	0.018411		0.158184	0.002692		0.25151	0.016523		0.150628	0.002392						1.25168
			150	0.186684	0.015769		0.157625	0.002563		0.238561	0.015396		0.151641	0.002311						1.26901
			152	0.181199	0.015639		0.157337	0.002592		0.241582	0.015808		0.151861	0.002268						1.18515
			154	0.185708	0.017491		0.155475	0.002532		0.242272	0.01703		0.15221	0.002357						1.21704
			156	0.183676	0.017486		0.157023	0.002646		0.235848	0.016436		0.150853	0.00237						0.951546
			158	0.177562	0.016051		0.157028	0.002598		0.215538	0.014201		0.149687	0.002429
			160	0.165647	0.01008		0.157236	0.002606		0.200982	0.013832		0.14941	0.00252
			162	0.160891	0.009713		0.157281	0.002896		0.189534	0.011898		0.1501	0.002563
			164	0.159894	0.009189		0.157212	0.002798		0.184785	0.011042		0.152538	0.003621
			166	0.161675	0.010322		0.157218	0.002799		0.181788	0.010244		0.154972	0.006177
			168	0.159532	0.00875		0.155172	0.002649		0.176795	0.01117		0.156667	0.007916
			170	0.157852	0.007972		0.155396	0.002795		0.168156	0.010633		0.156304	0.007437
			172	0.152027	0.005849		0.155929	0.002824		0.162841	0.007847		0.154778	0.006398
			174	0.15115	0.005107		0.157426	0.002745		0.157188	0.005784		0.154031	0.005946
			176	0.152576	0.005155		0.157629	0.002671		0.155628	0.005089		0.153587	0.005503
			178	0.153719	0.005076		0.157263	0.002591		0.150568	0.002289		0.153502	0.005137
			180	0.154034	0.004846		0.157465	0.002591		0.148991	0.001955		0.153083	0.005481
			182	0.153348	0.004616		0.157743	0.002438		0.145851	0.00186		0.153429	0.006093
			184	0.153998	0.005154		0.157733	0.002465		0.145493	0.001788		0.153495	0.005856
			186	0.153395	0.005142		0.157327	0.002603		0.14542	0.001865		0.152563	0.004999
			188	0.151516	0.004452		0.157059	0.002665		0.145927	0.001904		0.15126	0.004363
			190	0.149054	0.003836		0.158204	0.002809		0.145571	0.00177		0.151155	0.004434
			192	0.148467	0.003665		0.158221	0.002636		0.144541	0.001777		0.151614	0.005175
			194	0.147554	0.003567		0.158262	0.002694		0.143872	0.001765		0.151763	0.005014
			196	0.147668	0.003364		0.157767	0.00268		0.143722	0.001824		0.150288	0.004334
			198	0.14804	0.003561		0.158427	0.002711		0.144959	0.001834		0.149173	0.003264
			200	0.147632	0.003561		0.158202	0.002596		0.145024	0.001785		0.148484	0.002847
			202	0.14781	0.003526		0.157047	0.002588		0.143707	0.001732		0.148811	0.002641
			204	0.146286	0.003382		0.155384	0.002534		0.142243	0.001764		0.149041	0.002488
			206	0.146729	0.00336		0.154817	0.002548		0.14245	0.001783		0.149174	0.002434
			208	0.145636	0.003559		0.155326	0.002724		0.142763	0.001722		0.148992	0.00246
			210	0.147232	0.003533		0.155576	0.002693		0.143175	0.001725		0.148588	0.002476
			212	0.14642	0.003534		0.155353	0.002713		0.142204	0.001699		0.14827	0.00248
			214	0.146634	0.00326		0.15537	0.002698		0.142954	0.001703		0.14815	0.002446
			216	0.146064	0.003336		0.156068	0.002883		0.141757	0.001632		0.148052	0.002377
			218	0.147337	0.003417		0.155753	0.002705		0.142108	0.001706		0.148435	0.00228
			220	0.148121	0.003488		0.154567	0.002528		0.142366	0.001753		0.147557	0.002216
			222	0.14868	0.003499		0.154091	0.002407		0.144102	0.001792		0.148211	0.002242
			224	0.146946	0.003242		0.153524	0.00244		0.144944	0.001808		0.14814	0.002251
			226	0.146807	0.003289		0.153068	0.002458		0.144484	0.001725		0.1487	0.002336
			228	0.145501	0.002966		0.151694	0.002577		0.143264	0.001704		0.14752	0.002241
			230	0.146499	0.003068		0.152358	0.002656		0.143555	0.001708		0.145908	0.002175
			232	0.145777	0.003012		0.153176	0.002769		0.143471	0.001825		0.145166	0.002136
			234	0.145497	0.003178		0.153395	0.002722		0.143029	0.001891		0.144947	0.002125
			236	0.144118	0.003196		0.152409	0.002629		0.141309	0.001915		0.145025	0.002211
			238	0.143648	0.00323		0.151676	0.002568		0.140491	0.001794		0.144955	0.00225
			240	0.14374	0.00341		0.15185	0.002649		0.140484	0.001792		0.145231	0.002344
			242	0.143756	0.003272		0.152755	0.002667		0.140292	0.001777		0.145883	0.002353
			244	0.14365	0.003138		0.154432	0.002754		0.140463	0.001844		0.145838	0.002369
			246	0.147783	0.006809		0.154174	0.002668		0.140314	0.001798		0.146257	0.002333
			248	0.153209	0.011875		0.152879	0.002746		0.138789	0.001784		0.146303	0.00231
			250	0.1574	0.015857		0.150445	0.002601		0.138618	0.001721		0.147181	0.002327
			252	0.1571	0.013336		0.149866	0.002523		0.138235	0.00175		0.146934	0.002281
			254	0.156372	0.010964		0.149609	0.002513		0.139204	0.001742		0.146535	0.002218
			256	0.153661	0.008909		0.150793	0.002565		0.138384	0.001724		0.146213	0.002136
			258	0.152065	0.008079		0.151623	0.002731		0.138766	0.001798		0.145987	0.002126
			260	0.149572	0.006507		0.15169	0.002829		0.138414	0.001751		0.14633	0.002182
			262	0.14918	0.00566		0.152006	0.002969		0.13975	0.001798		0.14582	0.002191
			264	0.147988	0.005106		0.151212	0.002806		0.138944	0.001722		0.14606	0.002192
			266	0.148067	0.004965		0.152251	0.002811		0.140028	0.002027		0.145794	0.002132
			268	0.148989	0.004683		0.152487	0.002739		0.139237	0.002275		0.145422	0.002161
			270	0.148432	0.003902		0.154857	0.002852		0.144557	0.005108		0.145848	0.002111
			272	0.147499	0.003435		0.15562	0.00282		0.147765	0.00621		0.146539	0.002204
			274	0.146393	0.003355		0.156376	0.00286		0.151108	0.007427		0.147659	0.002262
			276	0.14714	0.003375		0.15539	0.002719		0.150628	0.007022		0.148597	0.002255
			278	0.147256	0.003229		0.155239	0.002839		0.149192	0.006186		0.148964	0.002242
			280	0.1469	0.003084		0.154658	0.0027		0.149369	0.005061		0.148559	0.002265
			282	0.146766	0.003134		0.15448	0.002735		0.150796	0.005442		0.147339	0.002354
			284	0.146003	0.003365		0.154523	0.002691		0.151674	0.005779		0.147365	0.002282
			286	0.145401	0.003306		0.154135	0.002662		0.150878	0.005641		0.14759	0.002206
			288	0.145346	0.003321		0.153194	0.002684		0.149385	0.003987		0.147827	0.002227
			290	0.14618	0.003211		0.15286	0.00274		0.149657	0.004657		0.147356	0.002249
			292	0.146457	0.003127		0.152735	0.002713		0.148767	0.004937		0.14707	0.002247
			294	0.146104	0.00305		0.153496	0.00275		0.145839	0.003676		0.146466	0.002237
			296	0.14508	0.00301		0.153206	0.002739		0.145088	0.003511		0.14608	0.002187
			298	0.14518	0.003082		0.15401	0.002811		0.144714	0.003866		0.14565	0.002215
			300	0.143809	0.002933		0.155208	0.002686		0.145118	0.00382		0.144977	0.002165

## Sheet: Panel G
WT	KO		Column B	KO
49045	58135		vs.	vs.
43659	64415		Column A	WT
38510	53833
44273	48591		Unpaired t test
41290	62346		P value	<0.0001
42755	54973		P value summary	****
46058	57462		Significantly different (P < 0.05)?	Yes
42755	63520		One- or two-tailed P value?	Two-tailed
45844	51383		t, df	t=7.192, df=18
43558	58407

## Sheet: Fig 2 Supp 1 Panel B
					Fig. 2-fig supp 1B (trace, left panel)								Fig. 2-fig supp 1B (bar-graph, right panel)
				AverageTrace: Ca2+ response: 0Ca 100nM ADP									Baseline subtracted ADP Ca2+ peak
				X-axis: Time (s), Y-axis: G/R Ratio (Salsa6f); SEM: std.error of mean									each data point is calculated from a single cell
					WT			TREM2 KO					WT	TREM2 KO
				Time (s)	Mean	SEM		Mean	SEM				column C	column D
				0	0.382168	0.007734		0.357734	0.004311				0.055216	2.21634			Column D	KO_100nMADP_peak-BL
				2	0.380631	0.007946		0.355655	0.004205				3.24069	2.14667			vs.	vs.
				4	0.378248	0.007905		0.354149	0.004255				2.7342	1.80764			Column C	WT_100nMADP_peak-BL
				6	0.385153	0.008879		0.353574	0.004202				0.033517	1.14211
				8	0.38584	0.008998		0.35641	0.004299				0.723438	1.9255			Mann Whitney test
				10	0.390159	0.009769		0.357355	0.004169				0.025567	2.23085			P value	< 0.0001
				12	0.387185	0.008902		0.35846	0.004197				0.012394	2.40799			Exact or approximate P value?	Exact
				14	0.386673	0.008697		0.358301	0.004123				0	1.90546			P value summary	****
				16	0.388998	0.012437		0.359161	0.004157				2.32939	1.38422			Significantly different? (P < 0.05)	Yes
				18	0.387162	0.012286		0.360261	0.004041				0.033269	2.08262			One- or two-tailed P value?	Two-tailed
				20	0.386232	0.012229		0.357956	0.003979				1.5583	1.803			Sum of ranks in column C,D	1685 , 5696
				22	0.38069	0.008529		0.356186	0.003985				0.024843	1.77243			Mann-Whitney U	604
				24	0.382171	0.009281		0.353869	0.003955				0.588907	1.76707
				26	0.38416	0.00899		0.356164	0.00408				1.75564	2.6324			Difference between medians
				28	0.383564	0.008958		0.358127	0.004186				0.978342	1.82476			Median of column C	0.207
				30	0.38287	0.008471		0.360261	0.004316				2.65057	2.06666			Median of column D	1.988
				32	0.382572	0.009038		0.359607	0.004271				0.036064	2.95899			Difference: Actual	1.781
				34	0.382483	0.00881		0.359316	0.004217				1.3922	0.84473			Difference: Hodges-Lehmann	1.517
				36	0.384451	0.009475		0.358294	0.004177				1.38742	2.09345
				38	0.385058	0.010366		0.357318	0.004233				0.18933	2.25478
				40	0.387271	0.012518		0.355306	0.004216				0.214715	1.69675
				42	0.385253	0.012397		0.354367	0.00425				0.030563	2.04953
				44	0.386215	0.011272		0.353568	0.004179				0.521871	1.32964
				46	0.385558	0.009349		0.353864	0.004074				0.007014	1.96987
				48	0.386285	0.009017		0.354489	0.003983				2.84521	2.0588
				50	0.381404	0.008563		0.354898	0.004021				0.020031	1.87015
				52	0.381866	0.008697		0.353766	0.004066				0.009108	1.44331
				54	0.38095	0.008611		0.352859	0.004156				2.06771	1.95961
				56	0.381484	0.008703		0.353447	0.004049				1.94632	2.35376
				58	0.379834	0.008679		0.355146	0.004126				0.010767	1.92113
				60	0.379687	0.008552		0.356163	0.004155				0.057595	1.87128
				62	0.379515	0.008426		0.354104	0.004261				1.83973	2.45468
				64	0.379125	0.008328		0.35348	0.004201				0.02685	2.43505
				66	0.378228	0.008538		0.351538	0.004193				0.031272	1.82375
				68	0.378989	0.008836		0.351636	0.004107				0.040145	1.75952
				70	0.378871	0.008894		0.349369	0.004107				0.037951	1.98725
				72	0.37886	0.008707		0.350214	0.004121				2.10378	1.52751
				74	0.375909	0.008438		0.350768	0.004179				0.925824	2.28861
				76	0.371079	0.008161		0.351354	0.004117				2.18167	1.99519
				78	0.371021	0.008006		0.349746	0.004281				0.138572	1.55805
				80	0.37346	0.008443		0.347704	0.00419				0.47286	2.40768
				82	0.377852	0.008893		0.345634	0.004195				0.42347	2.33273
				84	0.375407	0.008842		0.345112	0.004019				0.199189	2.38098
				86	0.373235	0.008823		0.344938	0.004111				0.025204	2.39191
				88	0.371909	0.008636		0.346209	0.004047				0.822015	1.97507
				90	0.371013	0.008762		0.346075	0.004118				0.051674	2.27961
				92	0.369281	0.008386		0.346092	0.004114					1.48807
				94	0.369392	0.008906		0.346949	0.004252					1.74839
				96	0.379701	0.012196		0.347661	0.004116					1.80866
				98	0.386961	0.015371		0.346562	0.004137					2.47871
				100	0.390402	0.016883		0.345519	0.004127					2.43932
				102	0.383524	0.012758		0.343879	0.004177					1.42835
				104	0.37719	0.010172		0.344375	0.004186					2.1384
				106	0.369096	0.008657		0.340006	0.004236					2.20777
				108	0.365264	0.008676		0.337528	0.004352					1.98805
				110	0.508645	0.050721		0.450966	0.030045					2.05429
				112	0.726189	0.098964		0.876088	0.060242					2.13456
				114	0.944797	0.141078		1.45715	0.082963					1.71871
				116	0.937336	0.126203		1.90389	0.083091					2.18902
				118	0.817817	0.094718		1.96098	0.07151					1.41843
				120	0.671863	0.066134		1.78142	0.058974					1.61345
				122	0.590944	0.051983		1.50842	0.052628					1.46048
				124	0.558964	0.052242		1.21541	0.04864					1.88312
				126	0.544792	0.052102		0.929891	0.04291					2.09562
				128	0.520347	0.046202		0.699275	0.033016					1.94305
				130	0.472271	0.030901		0.56117	0.02819					2.04401
				132	0.425717	0.019514		0.458163	0.01883					2.45121
				134	0.402227	0.017215		0.403885	0.015075					1.78294
				136	0.383699	0.015597		0.360673	0.009195					1.764
				138	0.375658	0.014424		0.34114	0.007721					1.70571
				140	0.370314	0.013881		0.326696	0.004846					2.10215
				142	0.367321	0.014416		0.318642	0.003868					2.05784
				144	0.362834	0.011637		0.315011	0.003642					2.05326
				146	0.356507	0.009684		0.31501	0.00363					2.02278
				148	0.351025	0.008335		0.312919	0.003737					2.82613
				150	0.345983	0.008289		0.312193	0.003853
				152	0.346643	0.008288		0.309926	0.003876
				154	0.346998	0.008329		0.310274	0.003754
				156	0.347341	0.008103		0.309354	0.003678
				158	0.344064	0.007604		0.310563	0.003562
				160	0.344615	0.007346		0.310532	0.003568
				162	0.345659	0.007436		0.310908	0.003582
				164	0.346206	0.007462		0.309746	0.00364
				166	0.346946	0.007726		0.308981	0.003624
				168	0.349722	0.008172		0.307863	0.003626
				170	0.359384	0.012373		0.308193	0.003599
				172	0.368319	0.019346		0.308056	0.003546
				174	0.371931	0.023622		0.309705	0.003549
				176	0.371603	0.021801		0.309723	0.00352
				178	0.36576	0.017662		0.310237	0.003506
				180	0.362023	0.01481		0.308694	0.003481
				182	0.353048	0.009942		0.307668	0.003498
				184	0.34842	0.008461		0.307162	0.003494
				186	0.345393	0.008041		0.307963	0.003565
				188	0.345511	0.007862		0.30868	0.003492
				190	0.344999	0.007431		0.308702	0.003576
				192	0.345967	0.007702		0.308621	0.00355
				194	0.346323	0.007867		0.308235	0.003611
				196	0.347553	0.008233		0.308413	0.003589
				198	0.347922	0.007704		0.308498	0.003509
				200	0.349056	0.007697		0.309114	0.003399
				202	0.351162	0.007811		0.309924	0.003397
				204	0.351106	0.008085		0.310178	0.003417
				206	0.351337	0.008194		0.310453	0.003456
				208	0.351245	0.0078		0.310648	0.003475
				210	0.353443	0.009517		0.312007	0.003557
				212	0.354509	0.011752		0.312651	0.003617
				214	0.354583	0.011908		0.312153	0.003485
				216	0.352054	0.01005		0.309513	0.003519
				218	0.35103	0.008463		0.308406	0.003555
				220	0.349541	0.008366		0.308559	0.003697
				222	0.352736	0.009963		0.308818	0.003641
				224	0.352232	0.009655		0.308468	0.003666
				226	0.350844	0.009478		0.307115	0.003627
				228	0.350172	0.008602		0.307467	0.003657
				230	0.356508	0.009954		0.3081	0.003657
				232	0.364996	0.013877		0.30954	0.00362
				234	0.367463	0.016508		0.310619	0.003521
				236	0.362801	0.01542		0.309681	0.003574
				238	0.356537	0.013786		0.309939	0.003624
				240	0.353904	0.013168		0.309359	0.003594
				242	0.355041	0.011295		0.309629	0.003634
				244	0.352689	0.009247		0.308104	0.003694
				246	0.349546	0.00782		0.309045	0.003791
				248	0.345325	0.007306		0.308317	0.003677
				250	0.345616	0.007767		0.309102	0.003602
				252	0.343608	0.007663		0.307664	0.00361
				254	0.354523	0.010243		0.308502	0.003718
				256	0.360942	0.012929		0.309534	0.003779
				258	0.372771	0.017401		0.309891	0.003719
				260	0.364484	0.011662		0.309689	0.00373
				262	0.363549	0.009331		0.309686	0.003849
				264	0.362266	0.011476		0.311134	0.003913
				266	0.363082	0.01269		0.312209	0.003911
				268	0.363474	0.010605		0.311109	0.00376
				270	0.363803	0.010784		0.309656	0.003821
				272	0.367117	0.01613		0.308522	0.003738
				274	0.367289	0.017072		0.309439	0.003774
				276	0.367328	0.015427		0.310179	0.003607
				278	0.365696	0.011961		0.310537	0.003657
				280	0.363533	0.010659		0.309938	0.00369
				282	0.358382	0.008668		0.308961	0.00378
				284	0.354606	0.00762		0.308492	0.003707
				286	0.353704	0.007593		0.307828	0.003692
				288	0.354349	0.007852		0.307025	0.003654
				290	0.356661	0.008374		0.30694	0.00378
				292	0.357937	0.008709		0.306583	0.003819
				294	0.358619	0.008386		0.307724	0.003905
				296	0.357543	0.008238		0.309063	0.003757
				298	0.363056	0.008441		0.310546	0.00379
				300	0.372169	0.015278		0.31233	0.003785
				302	0.379386	0.022548		0.313223	0.003916
				304	0.375895	0.022406		0.314197	0.004014
				306	0.362862	0.015524		0.313119	0.003915
				308	0.361945	0.014774		0.314163	0.003947
				310	0.354846	0.013432		0.313648	0.003748
				312	0.353369	0.013358		0.312431	0.00388
				314	0.344436	0.007254		0.311165	0.003907
				316	0.346299	0.007666		0.309576	0.004053
				318	0.344779	0.007693		0.310032	0.003967
				320	0.345064	0.007487		0.309012	0.004038
				322	0.344913	0.007642		0.311056	0.003949
				324	0.347463	0.007667		0.311248	0.0039
				326	0.348257	0.007782		0.312394	0.003824
				328	0.350035	0.007377		0.312177	0.003809
				330	0.351359	0.007325		0.311003	0.003967
				332	0.351722	0.00745		0.309383	0.003834
				334	0.351951	0.007743		0.307517	0.003908
				336	0.355517	0.008296		0.308417	0.003817
				338	0.361703	0.009712		0.309289	0.00387
				340	0.3645	0.010642		0.31068	0.003893
				342	0.363751	0.0099		0.310957	0.003988
				344	0.359301	0.008294		0.309779	0.003956
				346	0.3569	0.007763		0.308229	0.003885
				348	0.353231	0.007387		0.307208	0.003909
				350	0.352458	0.00775		0.308227	0.003921
				352	0.352556	0.007546		0.308952	0.003764
				354	0.354287	0.007924		0.309109	0.003707
				356	0.355698	0.00787		0.307841	0.003725
				358	0.354724	0.007976		0.307068	0.00385
				360	0.355981	0.007942		0.307378	0.003877
				362	0.362661	0.013644		0.307483	0.003902
				364	0.361468	0.013289		0.307366	0.003941
				366	0.360657	0.013293		0.306759	0.003891
				368	0.353582	0.007518		0.306133	0.003869
				370	0.354966	0.008006		0.305882	0.003813
				372	0.356622	0.008072		0.305828	0.003887
				374	0.36789	0.010784		0.306153	0.003849
				376	0.379084	0.01633		0.30717	0.00395
				378	0.389472	0.021189		0.305925	0.003882
				380	0.383083	0.016321		0.305702	0.003878
				382	0.37653	0.016263		0.3046	0.003899
				384	0.367052	0.012151		0.305669	0.003974
				386	0.365244	0.011315		0.30575	0.003834
				388	0.363083	0.009469		0.304906	0.003737
				390	0.358688	0.008862		0.303527	0.0038
				392	0.353294	0.007504		0.303019	0.003957
				394	0.348823	0.007132		0.302438	0.003896
				396	0.345091	0.006879		0.303904	0.003861
				398	0.345092	0.006837		0.304487	0.00378
				400
				402
				404
				406
				408
				410
				412
				414
				416
				418
				420
				422
				424
				426
				428
				430
				432
				434
				436
				438
				440
				442
				444
				446
				448
				450
				452
				454
				456
				458
				460
				462
				464
				466
				468
				470
				472
				474
				476
				478
				480
				482
				484
				486
				488
				490
				492
				494
				496
				498
				500

## Sheet: Fig 2 Supp 1 Panel C
	Fig .2- fig supp 1C
	peak cytosolic Ca2+ in response to ADP (2.5 mM ADP)
	in 1 mM Ca2+ or Ca2+-free buffer
	WT_1Ca	WT_0Ca	KO_1Ca	KO_0Ca
	1.36927	1.44684	1.53223	1.59814
	0.997429	1.51066	1.3742	1.58299
	1.66878	0.873686	1.36106	1.42719
	1.40647	0.832361	1.35828	1.27454
	1.18326	0.93089	1.29964	1.27788
	1.10167	0.881292	1.40177	1.55775
	1.26696	1.04066	1.21844	1.51718
	1.56891	1.19913	1.27398	1.49102
	1.40255	0.811726	1.42516	1.14186
	0.03483	1.29746	1.30337	1.33397
	1.33043	0.834164	1.41485	1.01325
	0.825817	1.03309	1.56444	1.39859
	0.152896	1.06544	1.44073	1.21613
	1.02102	0.966198	1.36091	1.60009
	1.03774	1.25459	1.49158	1.3678
	0.036533	1.02496	1.56864	1.53827
	1.28585	0.954278	1.54436	1.33071
	1.54478	1.22799	1.10241	1.29745
	1.39577	0.825943	1.45124	1.30127
	0.94968	1.17433	1.41402	1.24497
	1.31654	1.09817	1.45385	1.16852
	1.71297	1.29322	1.58269	1.31827
	1.11114	1.19456	1.27927	0.931045
	1.44638	1.39611	1.28841	1.58517
	1.22485	1.08723	1.20324	1.2561
	0.596353	1.03741	1.18535	1.55863
	1.09517	1.21166	1.48114	1.21218
	0.02247	1.07269	1.34058	1.29766
	1.24529	1.24428	1.48291	1.42754
	0.886712	1.09087	1.20597	1.34975
	1.68157	1.14053	1.2891	1.53437
	1.01475	1.32288	1.45632	1.33567
	1.3708	1.30109	1.52826	1.40154
	1.25389	1.0654	1.38721	1.40926
	1.09172	1.28028	1.41479	1.1016
	1.56405	1.12944	1.27418	1.01859
	1.38594	1.13012	1.19012	1.46117
	1.20378	1.46765	1.58471	1.60581
	1.40352	1.03964	1.53701
	1.733	1.20507	1.31415
	1.63682	0.661912	1.42511
	1.05267	1.27305
	1.12959	1.2312
	1.32667	0.937249
		1.28713
		0.871647
		0.995337
		0.84979
		1.16406
		1.33082
		1.27938
		0.929055
		0.697774
		1.18894
		0.909797
		0.910061
		0.770855
		0.846843
		1.38627
		1.16724
		1.35826
		1.22363
		0.917459
		1.20155
		1.39754
		1.2973
		0.905976
		1.08042
		0.765114
		1.11545
		1.0656
		1.088
		1.05494
		0.843438
		1.24793
		1.1338
		0.88755
		0.890768
		1.19382
		0.865987
		1.104
		1.23825
		1.40694
		0.767026
		0.893645
		1.07366
		1.14616
		1.28385
		0.673704
		0.650967
		1.19956
		1.33575
		0.964695
		0.571015
		0.473222
		0.525772

## Sheet: Fig 2 Supp 1 Panel D-E
		Fig. 2- fig supp 1D								Fig. 2- fig supp 1E
		Volcano plot: bulk RNA seq- WT and TREM2 KO microglia								RNA normalized read counts
			log_fc_value	prob_value							WT				TREM2 KO
		A1BG	0.110513	-0.318736						P2RY12	0.92366	1.0402	1.00778	1.02836	2.62591	2.81288	2.45398	2.62891
		A1BG-AS1	-0.0492593	-0.130035						P2RY13	0.902197	1.01985	0.964015	1.11394	2.06527	2.24894	1.93421	2.04646
		A2M	-0.0608096	-0.730999						ORAI1	1.10353	0.912167	1.02946	0.954851	0.974692	0.851556	0.975575	0.962214
		A2M-AS1	0.00336145	-0.00306097						STIM1	1.04816	0.994532	0.926906	1.0304	0.807438	0.812712	0.835708	0.879128
		A4GALT	-1.31223	0						ITPR2	0.941745	0.91493	0.963707	1.17962	0.822467	0.837813	0.727957	0.829213
		AAAS	-0.0659531	-0.521849						ATP2A2	1.0071	1.01948	0.941968	1.03145	0.962358	0.966886	0.968821	1.03384
		AACS	0.175067	-2.32202						ATP2A3	1.01757	1.01838	0.967568	0.996484	1.13325	1.19645	1.14499	1.24478
		AACSP1	1.15196	-0.54765						ATP2B1	0.965713	0.998097	0.981029	1.05516	1.05887	1.06794	1.03423	1.06025
		AADAT	-0.473414	-0.764011
		AAED1	0.111832	-0.759606
		AAGAB	0.0160996	-0.0761433							log2(FC)	p-value
		AAK1	0.00994647	-0.0206255						P2RY12	1.38964	1.27e-140
		AAMDC	0.108861	-0.320086						P2RY13	1.04835	2.7e-77
		AAMP	0.0394927	-0.399895						ORAI1	-0.0912924	0.323793
		AANAT	-0.0139792	-0.00242344						STIM1	-0.265372	2.01e-09
		AAR2	0.115506	-1.26198						ITPR2	-0.310358	0.0033371
		AARS	0.0864596	-2.07309						ATP2A2	-0.0284195	0.544752
		AARS2	-0.051116	-0.382657						ATP2A3	0.234594	1.31e-09
		AASDH	0.00531621	-0.0128887						ATP2B1	0.0738439	0.10583
		AASDHPPT	0.0809824	-0.714076
		AASS	0.337789	-1.08388
		AATF	-0.0459404	-0.400391
		AATK	-0.601209	-1.55012
		ABAT	0.407844	-9.50864
		ABCA1	-0.142864	-1.11219
		ABCA10	0.434991	-0.20031
		ABCA11P	0.103709	-0.2013
		ABCA13	-0.320117	0
		ABCA2	0.126797	-0.944836
		ABCA3	0.0878015	-0.160381
		ABCA5	-0.0431566	-0.147212
		ABCA6	0.566563	-0.158494
		ABCA7	-0.18269	-2.99313
		ABCB1	-2.34627	-1.47113
		ABCB10	-0.172642	-2.9451
		ABCB4	-0.713422	-7.6517
		ABCB6	0.131124	-0.283277
		ABCB7	-0.0252321	-0.117637
		ABCB8	-0.0679859	-0.609548
		ABCB9	-0.150225	-0.457006
		ABCC1	0.0688427	-0.615748
		ABCC10	-0.0345394	-0.213367
		ABCC11	-0.59279	-0.338291
		ABCC13	-1.44961	0
		ABCC2	0.175501	-0.132303
		ABCC3	-0.818577	-8.67985
		ABCC4	0.265812	-10.1986
		ABCC5	-0.0011692	-0.0031524
		ABCC5-AS1	1.63632	-0.719015
		ABCC6	0.109593	-0.304783
		ABCC6P1	0.728281	-0.305527
		ABCD1	-0.141634	-1.70864
		ABCD2	0.0135676	-0.00242344
		ABCD3	-0.122284	-1.56328
		ABCD4	-0.0372813	-0.24338
		ABCE1	0.0478309	-0.492404
		ABCF1	-0.0139424	-0.0938589
		ABCF2	0.121008	-2.24077
		ABCF3	-0.0309297	-0.17537
		ABCG1	-0.0050968	-0.00903839
		ABCG2	0.150673	-1.06441
		ABCG4	-1.19537	0
		ABHD10	-0.202615	-4.09963
		ABHD11	-0.142716	-1.25816
		ABHD12	-0.165136	-6.54212
		ABHD13	0.0564989	-0.291021
		ABHD14A	0.106043	-0.193201
		ABHD14B	0.0148636	-0.0388066
		ABHD15	0.00806973	-0.0290356
		ABHD16A	-0.271012	-8.95861
		ABHD17A	-0.004682	-0.0214162
		ABHD17B	0.0943689	-0.636901
		ABHD17C	-0.347068	-0.340451
		ABHD2	-0.172845	-4.2636
		ABHD3	-0.0540736	-0.414369
		ABHD4	0.0411812	-0.179449
		ABHD5	-0.215492	-2.6748
		ABHD6	0.0269364	-0.0900616
		ABHD8	0.0754059	-0.394779
		ABI1	0.0490436	-0.537814
		ABI2	0.0608316	-0.46635
		ABI3	-0.201826	-6.39147
		ABL1	-0.0780378	-0.947598
		ABL2	0.0728453	-0.170604
		ABLIM1	-0.858023	-1.01346
		ABLIM2	-0.0008006	-0.000304247
		ABLIM3	-1.39783	-29.4498
		ABR	-0.0739302	-1.45638
		ABRACL	0.00536139	-0.0239193
		ABT1	0.136025	-1.9282
		ABTB1	0.256955	-2.33208
		ABTB2	0.00117261	-0.00032377
		AC093375.1	-2.02865	-1.2064
		ACAA1	0.0636321	-0.557153
		ACAA2	0.016695	-0.0877182
		ACACA	0.297833	-6.46218
		ACACB	-0.419088	-2.86852
		ACAD10	0.0225332	-0.113782
		ACAD11	-0.0066971	-0.00456114
		ACAD8	-0.141638	-1.43853
		ACAD9	-0.0094312	-0.0533862
		ACADM	-0.0972844	-1.28304
		ACADS	-0.0880114	-0.368233
		ACADSB	0.0097882	-0.0350919
		ACADVL	-0.164453	-5.41341
		ACAN	-5.70382	-5.47625
		ACAP1	0.765959	-27.1884
		ACAP2	0.0320169	-0.23345
		ACAP3	-0.159146	-1.35672
		ACAT1	0.0592734	-0.655403
		ACAT2	0.377065	-21.1675
		ACBD3	0.0584276	-0.445198
		ACBD4	-0.0680745	-0.157919
		ACBD5	-0.146563	-3.02903
		ACBD6	0.0655881	-0.439995
		ACBD7	0.808853	-0.680489
		ACCS	-0.345782	-3.40949
		ACD	-0.152001	-0.840248
		ACE	-0.665604	-1.28933
		ACER2	0.0604082	-0.119067
		ACER3	0.0910771	-1.02382
		ACIN1	0.0614498	-0.853473
		ACKR2	-0.405212	-0.803106
		ACKR4	0.65901	0
		ACLY	0.262089	-18.2782
		ACN9	0.132982	-0.628225
		ACO1	-0.0090343	-0.0449625
		ACO2	-0.0324062	-0.350097
		ACOT1	0.15314	-0.464395
		ACOT11	-0.186587	-3.05217
		ACOT13	0.0518014	-0.285681
		ACOT2	0.0944041	-0.609771
		ACOT4	-0.646938	-1.24883
		ACOT7	-0.186844	-3.67469
		ACOT8	0.142788	-0.974915
		ACOT9	-0.0282954	-0.165382
		ACOX1	-0.0106058	-0.0487182
		ACOX2	-1.88762	-3.1426
		ACOX3	0.0450578	-0.225405
		ACP1	0.0250144	-0.174832
		ACP2	-0.374285	-11.5452
		ACP5	-1.30854	-69.3298
		ACP6	0.126693	-0.402097
		ACPP	-0.133244	-1.04204
		ACRBP	0.241607	-1.67487
		ACRC	0.873512	-2.45951
		ACSBG2	0.985262	0
		ACSF2	0.0497517	-0.179271
		ACSF3	0.0457577	-0.215286
		ACSL1	-0.009583	-0.05786
		ACSL3	0.157077	-3.93401
		ACSL4	0.215742	-10.1487
		ACSL5	0.0918153	-0.625211
		ACSM3	-1.24749	-1.08958
		ACSM5	-0.299466	-0.998702
		ACSS1	0.522104	-11.8447
		ACSS2	0.30883	-11.1979
		ACSS3	-0.355023	-1.76027
		ACTA2	0.466256	-0.601482
		ACTB	0.11426	-2.61608
		ACTG1	0.0483869	-0.811065
		ACTG1P4	0.998776	0
		ACTL10	0.577468	-1.20582
		ACTL6A	-0.0523793	-0.528904
		ACTL8	-0.999525	-0.314785
		ACTN1	0.134773	-5.46725
		ACTN2	0.124262	-0.0311238
		ACTN4	-0.0187008	-0.172631
		ACTR10	-0.0800471	-0.913824
		ACTR1A	0.0145303	-0.099248
		ACTR1B	0.00128902	-0.004582
		ACTR2	0.0334985	-0.363066
		ACTR3	-0.017976	-0.172478
		ACTR3B	0.0976921	-0.20998
		ACTR3C	1.05024	0
		ACTR5	0.00578472	-0.0161299
		ACTR6	0.0038554	-0.0113376
		ACTR8	-0.000308	-0.00116494
		ACTRT3	-1.63376	-2.67744
		ACVR1	-0.203514	-1.80496
		ACVR1B	-0.249121	-4.55909
		ACVR2A	0.0830741	-0.215753
		ACVR2B	0.0859294	-0.30086
		ACVR2B-AS1	-0.169628	0
		ACVRL1	-0.149285	-0.548225
		ACY1	0.0553603	-0.021556
		ACY3	1.2897
		ACYP1	-0.137119	-0.479562
		ACYP2	-0.137403	-0.559119
		ADA	-0.194268	-1.77368
		ADAL	-0.127832	-0.533663
		ADAM10	-0.0832025	-1.38387
		ADAM11	0.472941	-0.227544
		ADAM12	-1.26607	-2.26293
		ADAM15	-0.0887824	-0.948318
		ADAM17	0.156665	-3.37812
		ADAM19	1.70233	-37.567
		ADAM1A	-0.0288879	-0.031923
		ADAM21	-0.775945	0
		ADAM22	-1.09768	-2.01356
		ADAM23	-0.650733	-8.62893
		ADAM28	0.0097514	-0.0586613
		ADAM32	-0.261228	0
		ADAM33	0.541671	0
		ADAM8	0.668022	-7.04191
		ADAM9	0.0210987	-0.190408
		ADAMDEC1	-0.893819	-89.6198
		ADAMTS10	0.498239	-8.96658
		ADAMTS12	-0.28038	-0.266123
		ADAMTS13	0.447124	-0.597755
		ADAMTS14	-0.55047	-0.206565
		ADAMTS15	-0.625977	0
		ADAMTS17	-2.33193	-1.96568
		ADAMTS4	-0.253296	-0.11728
		ADAMTS5	-2.03305	0
		ADAMTS6	-0.484719	-0.271255
		ADAMTSL2	0.419385	-0.518002
		ADAMTSL4	-0.340607	-3.48948
		ADAMTSL4-AS1	0.00062853	0
		ADAMTSL5	0.489359	-0.225457
		ADAP1	0.171251	-2.15676
		ADAP2	-0.104019	-2.48674
		ADAR	0.0621904	-0.587273
		ADARB1	-1.112	-64.1931
		ADARB2	-0.0379367	-0.0120638
		ADAT1	-0.0979999	-0.805035
		ADAT2	-0.219908	-3.22218
		ADAT3	0.0735456	-0.122585
		ADC	0.597821	-2.67202
		ADCK1	-0.0379155	-0.119259
		ADCK2	0.312585	-12.5214
		ADCK3	-0.0865402	-0.437716
		ADCK4	0.0911274	-0.49176
		ADCK5	-0.104748	-0.530198
		ADCY1	-1.79954	-16.1085
		ADCY10	-1.87794	-3.56852
		ADCY10P1	-0.0200264	-0.0209157
		ADCY3	-1.21074	-205.955
		ADCY4	-0.800056	-2.63366
		ADCY6	-0.304093	-4.67366
		ADCY7	0.139012	-3.92165
		ADCY9	-0.264987	-1.31977
		ADD1	0.0895526	-1.54441
		ADD2	-0.607851	-0.877676
		ADD3	-0.0445749	-0.29395
		ADD3-AS1	1.16237	0
		ADGB	0.649586	-0.341023
		ADH5	-0.0529019	-0.529589
		ADHFE1	0.0711302	-0.0531392
		ADI1	0.0214026	-0.146282
		ADIPOR1	-0.0502451	-0.474978
		ADIPOR2	0.162842	-4.98297
		ADIRF	0.168602	0
		ADK	-0.332997	-10.7399
		ADM	-0.55433	-4.33068
		ADM2	1.2425	-0.921766
		ADM5	0.216836	-0.367841
		ADNP	0.0584035	-0.630909
		ADNP2	0.0844432	-0.746214
		ADO	-0.0234809	-0.106123
		ADORA1	0.115009	-1.00623
		ADORA2B	0.180439	-0.13783
		ADORA3	-0.164269	-7.32422
		ADPGK	-0.170555	-6.37161
		ADPGK-AS1	-0.129948	-0.0990826
		ADPRH	-0.120477	-1.22909
		ADPRHL1	1.59712	0
		ADPRHL2	0.105464	-1.14245
		ADPRM	0.0521538	-0.0907872
		ADRA1B	1.37572	-1.18371
		ADRB1	0.881868	-2.26105
		ADRB2	0.390578	-7.77728
		ADRBK1	-0.0225539	-0.204235
		ADRBK2	0.0682481	-0.80652
		ADRM1	0.0153988	-0.0877725
		ADSL	0.0829609	-1.11055
		ADSS	-0.164627	-3.48613
		ADSSL1	-0.186692	-0.360081
		ADTRP	-1.91503	-4.65365
		AEBP1	0.846136	-0.375551
		AEBP2	0.0494325	-0.219883
		AEN	0.164379	-3.24332
		AES	0.42161	-18.4473
		AFAP1	-0.426617	-1.80627
		AFAP1-AS1	-0.864628	0
		AFAP1L1	-1.12279	-2.4476
		AFF1	0.0179141	-0.0630467
		AFF3	1.30778	-4.1707
		AFF4	0.114616	-1.21484
		AFG3L1P	0.118216	-1.05572
		AFG3L2	0.00424214	-0.0241302
		AFMID	0.137723	-0.816062
		AFTPH	0.0663814	-0.597865
		AGA	0.028029	-0.106508
		AGAP1	0.013452	-0.0271863
		AGAP11	-1.26947	-3.06199
		AGAP2	-0.399873	-2.73527
		AGAP2-AS1	-0.0068314	-0.013857
		AGAP3	0.0403449	-0.242703
		AGAP4	-0.143862	-0.139537
		AGAP5	0.121413	-0.229785
		AGAP6	0.230473	-1.402
		AGAP7	0.391489	-0.225211
		AGAP9	0.0475214	-0.0412706
		AGBL2	-0.0671625	-0.0168379
		AGBL3	0.251452	-0.290822
		AGBL4	-3.22207	0
		AGBL5	0.156517	-0.969414
		AGER	0.133357	-0.405244
		AGFG1	0.027387	-0.215403
		AGFG2	-0.165351	-1.05122
		AGGF1	-0.117799	-2.22329
		AGK	-0.0456685	-0.221288
		AGL	-0.0900712	-0.803106
		AGMAT	0.0874	-0.139677
		AGO1	-0.210449	-4.02595
		AGO2	0.123793	-0.503449
		AGO3	-0.0452398	-0.121187
		AGO4	0.117941	-1.14709
		AGPAT1	-0.135103	-2.22477
		AGPAT2	0.107873	-0.840943
		AGPAT3	0.166921	-4.74473
		AGPAT4	-0.371184	-4.27409
		AGPAT4-IT1	-0.152981	-0.0725678
		AGPAT5	-0.196812	-4.55909
		AGPAT6	0.0293173	-0.252121
		AGPAT9	0.41508	-13.7212
		AGPS	-0.005945	-0.032093
		AGR2	0.714939	-2.65346
		AGRN	-0.295668	-3.32233
		AGRP	-1.11711	-0.473558
		AGT	-0.533984	-1.68446
		AGTPBP1	0.0346932	-0.180566
		AGTRAP	-0.14954	-1.36313
		AHCTF1	-0.0159738	-0.0760558
		AHCTF1P1	-0.0166898	-0.0345215
		AHCY	-0.132132	-4.1296
		AHCYL1	0.0952102	-2.45026
		AHCYL2	0.0602178	-0.455531
		AHDC1	0.131135	-0.921342
		AHI1	-0.365155	-4.25885
		AHNAK	0.15037	-0.325385
		AHNAK2	-0.602428	-0.521113
		AHR	0.155007	-2.96613
		AHRR	-0.182705	-2.83079
		AHSA1	-0.0056046	-0.0287304
		AHSA2	-0.267827	-4.15428
		AIDA	0.150709	-2.10539
		AIF1	-0.0019866	-0.00988434
		AIF1L	-0.0714893	-0.0350919
		AIFM1	-0.0162711	-0.106508
		AIFM2	-0.317193	-2.2388
		AIFM3	0.00113011	-0.000924145
		AIG1	-0.375432	-7.6925
		AIM1	0.0823485	-0.946307
		AIM1L	-1.59994	0
		AIMP1	0.0441852	-0.308794
		AIMP2	0.072213	-0.67464
		AIP	0.0576887	-0.453894
		AJUBA	1.31922	-1.83185
		AK1	-0.0387772	-0.127768
		AK2	0.1085	-2.42514
		AK3	-0.217132	-5.35067
		AK4	-0.466223	-0.132422
		AK6	0.00260742	-0.0060441
		AK7	0.0233885	-0.0108841
		AK9	0.131854	-0.24415
		AKAP1	-0.0343015	-0.249788
		AKAP10	-0.0997877	-1.27718
		AKAP11	0.0416645	-0.240257
		AKAP12	0.129865	-0.71527
		AKAP13	0.171866	-0.706384
		AKAP17A	-0.290322	-0.275006
		AKAP3	0.169956	-0.119216
		AKAP5	-0.846063	-2.85417
		AKAP6	-0.382651	-9.24185
		AKAP7	-1.21072	-11.2125
		AKAP8	0.0930217	-0.976689
		AKAP8L	0.134851	-1.74353
		AKAP9	0.154459	-0.601967
		AKIP1	-0.0539984	-0.316999
		AKIRIN1	-0.0570617	-0.717071
		AKIRIN2	-0.0579621	-0.468165
		AKNA	0.125151	-2.40804
		AKR1A1	0.0884266	-1.68252
		AKR1B1	0.0669881	-1.01262
		AKR1C1	1.22688	0
		AKR1E2	0.819888	-1.23319
		AKR7A2	0.02148	-0.124767
		AKR7A3	-0.0765818	-0.0345215
		AKR7L	-0.0868109	-0.0423051
		AKT1	-0.155978	-3.92464
		AKT1S1	0.120832	-1.41918
		AKT2	0.165527	-5.21896
		AKT3	-0.0288579	-0.116314
		AKTIP	-0.10014	-0.380141
		ALAD	-0.0908926	-0.955887
		ALAS1	-0.0654366	-0.842421
		ALCAM	-0.25105	-13.007
		ALDH16A1	-0.218516	-7.30715
		ALDH18A1	0.216258	-5.92812
		ALDH1A1	-0.825007	-34.3585
		ALDH1A2	-0.767483	-0.363418
		ALDH1A3	-1.76802	-8.75945
		ALDH1B1	0.17499	-2.58491
		ALDH1L2	0.871233	-19.7595
		ALDH2	0.455565	-37.327
		ALDH3A2	-0.159114	-2.43585
		ALDH3B1	-0.456902	-23.4962
		ALDH4A1	-0.0316797	-0.141098
		ALDH5A1	-0.973661	-27.4634
		ALDH6A1	0.175263	-1.96751
		ALDH7A1	0.124791	-1.85859
		ALDH8A1	1.42326	0
		ALDH9A1	-0.059788	-0.638389
		ALDOA	0.0403923	-0.584421
		ALDOC	0.354243	-4.54061
		ALG1	-0.145297	-2.53426
		ALG10	-0.106915	-0.456771
		ALG10B	0.364665	-0.670669
		ALG11	-0.0143018	-0.0319026
		ALG12	-0.124074	-1.35654
		ALG13	0.0700118	-0.388879
		ALG14	-0.0161045	-0.030994
		ALG1L2	0.746918	-0.730999
		ALG1L9P	-1.20107	-0.774967
		ALG2	0.13697	-1.77125
		ALG3	-0.206854	-4.82391
		ALG5	-0.221363	-3.91696
		ALG6	-0.339198	-5.20551
		ALG8	-0.133842	-1.49214
		ALG9	-0.136404	-1.4803
		ALK	-1.98949	-1.80109
		ALKBH1	0.139397	-0.834361
		ALKBH2	0.0766825	-0.157632
		ALKBH3	0.0885403	-0.491844
		ALKBH4	-0.005539	-0.013857
		ALKBH5	0.0599316	-0.399752
		ALKBH6	-0.0278565	-0.0736437
		ALKBH7	0.121219	-1.12164
		ALKBH8	0.119055	-0.514033
		ALMS1	0.0717035	-0.115065
		ALMS1-IT1	0.250238	-0.164487
		ALMS1P	0.632178	0
		ALOX15	1.11442	-2.00291
		ALOX15B	-0.659853	-1.09019
		ALOX5	0.0681498	-1.08388
		ALOX5AP	-0.0744564	-1.0894
		ALPK1	-0.042039	-0.259666
		ALPK3	-1.27427	-33.6402
		ALS2	-0.0813881	-0.597592
		ALS2CL	-2.75748	-9.08407
		ALS2CR12	-0.0762005	-0.0307942
		ALYREF	-0.0369589	-0.284201
		AMACR	0.13074	-0.180937
		AMBRA1	0.0592152	-0.521545
		AMD1	0.0515762	-0.838034
		AMDHD1	-0.253343	-1.81214
		AMDHD2	-0.0660596	-0.468515
		AMER1	0.235157	-1.45056
		AMFR	-0.131582	-2.94512
		AMH	0.212646	-0.221199
		AMICA1	1.05011	-27.1599
		AMIGO1	-1.16949	-0.917087
		AMIGO2	-0.570512	-5.81816
		AMIGO3	0.240567	-0.552906
		AMMECR1	0.163473	-1.49684
		AMMECR1L	0.0357085	-0.18046
		AMN	1.02556	-0.55837
		AMN1	-0.0608862	-0.17038
		AMOT	0.0979257	-0.394722
		AMOTL1	-0.892983	-5.73049
		AMPD2	0.079583	-0.66955
		AMPD3	-0.0262849	-0.232584
		AMT	0.167591	-1.07199
		AMY2B	-0.152785	-0.512983
		AMZ1	-1.23512	0
		AMZ2	-0.13251	-1.27512
		AMZ2P1	-0.365985	-2.71609
		ANAPC1	0.0745672	-0.526475
		ANAPC10	-0.0764403	-0.237106
		ANAPC11	-0.0265076	-0.122293
		ANAPC13	-0.239588	-3.96461
		ANAPC15	0.112207	-1.28241
		ANAPC16	0.00204182	-0.00918814
		ANAPC1P1	0.180616	-0.035417
		ANAPC2	-0.002228	-0.00655287
		ANAPC4	-0.261589	-6.86967
		ANAPC5	0.0182926	-0.119067
		ANAPC7	0.0172275	-0.111414
		ANG	0.509434	-0.937227
		ANGEL1	-0.0248895	-0.118903
		ANGEL2	-0.0040553	-0.0155863
		ANGPT1	-0.612796	0
		ANGPT4	0.974778	-0.821265
		ANGPTL6	-1.0793	-16.8962
		ANK1	0.233935	-0.169418
		ANK2	-0.288028	-4.20761
		ANK3	0.089439	-0.0194538
		ANKAR	-0.023466	-0.0178463
		ANKDD1A	-0.0280856	-0.0596099
		ANKDD1B	1.72221	-0.827697
		ANKEF1	0.0687575	-0.238233
		ANKFY1	0.0545392	-0.460753
		ANKH	0.0936691	-1.79487
		ANKHD1	-0.132183	-0.273815
		ANKHD1-EIF4EBP3	1.21645	0
		ANKIB1	0.113408	-1.6374
		ANKLE1	0.0453655	-0.0220566
		ANKLE2	-0.0391919	-0.352126
		ANKMY1	-0.0878953	-0.297684
		ANKMY2	-0.108757	-0.840943
		ANKRA2	-0.123226	-0.532353
		ANKRD10	-0.000299	-0.00116494
		ANKRD11	0.1716	-2.32155
		ANKRD12	-0.104892	-1.08171
		ANKRD13A	0.0862028	-0.982335
		ANKRD13B	0.0765221	-0.071872
		ANKRD13C	0.0222671	-0.0914911
		ANKRD13D	-0.054175	-0.465536
		ANKRD16	0.125619	-0.26001
		ANKRD17	0.102811	-0.989806
		ANKRD18B	-0.231732	-0.0886183
		ANKRD18DP	0.122154	-0.201882
		ANKRD19P	0.136667	0
		ANKRD20A4	0.0681632	-0.0222101
		ANKRD20A9P	-0.0571999	-0.0285347
		ANKRD22	-0.730728	-4.27654
		ANKRD23	0.00439754	-0.00733504
		ANKRD24	-0.0882468	-0.0625434
		ANKRD26	-0.0329977	-0.0890461
		ANKRD27	0.0737736	-0.579491
		ANKRD28	-0.0685606	-0.386098
		ANKRD31	0.285607	0
		ANKRD32	-0.102053	-0.646473
		ANKRD33B	-0.59436	-9.6216
		ANKRD34A	0.135078	-0.0616124
		ANKRD35	-0.581635	-3.2329
		ANKRD36	-0.0366769	-0.0678383
		ANKRD36B	-0.152359	-0.32406
		ANKRD36BP1	0.984784	-0.372889
		ANKRD37	-0.0851323	-0.0543623
		ANKRD39	0.0687289	-0.371352
		ANKRD40	0.0881472	-1.11611
		ANKRD42	-0.0784509	-0.248641
		ANKRD44	0.214353	-4.61439
		ANKRD44-IT1	2.29672	0
		ANKRD46	-0.117135	-1.06745
		ANKRD49	-0.0030417	-0.00809296
		ANKRD50	-0.0356064	-0.180467
		ANKRD52	-0.0098913	-0.044073
		ANKRD54	-0.033561	-0.121721
		ANKRD55	-0.0141406	-0.0096831
		ANKRD6	-0.147714	-0.912952
		ANKRD61	0.418821	-0.154912
		ANKRD66	0.0750141	0
		ANKRD9	-0.461274	-6.91721
		ANKS1A	0.0350981	-0.146591
		ANKS3	0.23582	-1.39679
		ANKS6	-0.106427	-0.368233
		ANKZF1	0.0281137	-0.101756
		ANLN	-0.188539	-7.4389
		ANO10	0.118299	-1.10524
		ANO5	-0.928652	-9.87615
		ANO6	-0.1921	-4.98716
		ANO7	-0.0954938	-0.0865138
		ANO8	0.0277189	-0.0705128
		ANO9	0.711373	-0.560937
		ANP32A	0.0673088	-0.893256
		ANP32A-IT1	1.39407	-3.69793
		ANP32AP1	-0.145517	-0.0709711
		ANP32B	0.0324164	-0.247644
		ANP32C	-0.385314	-0.179271
		ANP32E	0.0236891	-0.189616
		ANPEP	-0.842159	-0.694381
		ANTXR1	0.248721	-9.29499
		ANTXR2	-0.188149	-2.96293
		ANXA1	-0.398262	-23.3224
		ANXA11	-0.112432	-1.79827
		ANXA2	0.0931659	-1.65342
		ANXA2P1	0.200833	-0.145053
		ANXA2P2	0.108706	-0.588792
		ANXA2R	-0.110185	-0.148821
		ANXA3	0.270734	-0.222331
		ANXA4	0.0415166	-0.282287
		ANXA5	0.0191965	-0.189514
		ANXA6	-0.578035	-53.9431
		ANXA7	0.0211612	-0.173122
		ANXA9	0.0718181	-0.0584453
		AOAH	0.244589	-4.71897
		AOC1	0.0782976	-0.327207
		AOC2	0.312161	-0.236912
		AOC3	0.232153	-0.121906
		AOX1	-0.80838	-0.305228
		AP1AR	-0.0334474	-0.147045
		AP1B1	-0.0569854	-0.909759
		AP1G1	0.0618458	-0.592459
		AP1G2	-0.10666	-1.47107
		AP1M1	-0.0087381	-0.0446956
		AP1S1	-0.0709742	-0.384035
		AP1S2	0.242281	-8.9431
		AP1S3	-0.230357	-1.07199
		AP2A1	-0.0460152	-0.429242
		AP2A2	-0.0298318	-0.257164
		AP2B1	0.0914625	-1.66305
		AP2M1	0.0157859	-0.12402
		AP2S1	-0.0372727	-0.329884
		AP3B1	-0.0619205	-0.743895
		AP3B2	-1.57022	-1.36374
		AP3D1	0.149866	-4.82391
		AP3M1	-0.0003977	-0.00171012
		AP3M2	-0.15601	-1.23118
		AP3S1	-0.135582	-2.06351
		AP3S2	0.21042	-0.184747
		AP4B1	-0.180217	-2.47155
		AP4B1-AS1	-1.50153	0
		AP4E1	0.0899266	-0.989806
		AP4M1	0.0455594	-0.13473
		AP4S1	0.0888363	-0.26001
		AP5B1	-0.0007653	-0.0027623
		AP5M1	0.0226753	-0.130452
		AP5S1	-0.0797686	-0.328261
		AP5Z1	0.0975368	-1.03539
		APAF1	0.0791274	-1.2115
		APBA1	0.0560494	-0.313993
		APBA2	-1.59535	-62.0301
		APBA3	-0.0245757	-0.0536978
		APBB1	-0.406546	-0.788298
		APBB1IP	0.295702	-19.983
		APBB2	-0.0232966	-0.0592238
		APBB3	-0.13633	-1.00803
		APC	0.065348	-0.381405
		APC2	-0.990072	0
		APEH	-0.0432731	-0.524677
		APEX1	0.127724	-2.57017
		APEX2	-0.147523	-2.38137
		APH1A	0.046111	-0.536513
		APH1B	-0.0739633	-0.455683
		API5	-0.0005849	-0.00306097
		APIP	-0.0322597	-0.188691
		APITD1	-0.0292789	-0.0179861
		APLF	-0.100286	-0.165105
		APLN	-1.21793	-0.855988
		APLP1	0.816853	-0.494349
		APLP2	-0.31385	-26.6576
		APMAP	-0.38027	-31.27
		APOA1BP	-0.0939064	-0.8187
		APOB	0.861667	-0.704677
		APOBEC2	0.477634	0
		APOBEC3B	-0.149738	-1.08958
		APOBEC3C	0.162654	-3.15022
		APOBEC3D	-0.769146	-0.24339
		APOBEC3F	0.0383935	-0.0701134
		APOBEC3G	-0.0773437	-0.333174
		APOBEC3H	-0.0032632	-0.00232439
		APOBR	0.0145521	-0.0809394
		APOC1	-1.29526	-201.186
		APOC1P1	-1.24493	-1.4254
		APOC4-APOC2	-1.99889	0
		APOE	-0.751355	-161.415
		APOH	0.0635558	0
		APOL1	0.164754	-0.565483
		APOL2	-0.0760438	-0.646933
		APOL3	0.308846	-0.248228
		APOL4	0.579816	-1.49225
		APOL6	-0.037677	-0.191394
		APOLD1	-0.0894035	-0.071872
		APOM	-0.105286	-0.153916
		APOO	-0.206254	-1.73117
		APOOL	-0.0531143	-0.316545
		APOPT1	0.0255454	-0.103328
		APP	0.0103278	-0.0872327
		APPBP2	0.0892281	-0.985434
		APPL1	-0.0962407	-1.7973
		APPL2	0.129539	-2.95593
		APRT	0.166053	-3.59324
		APTR	0.123918	-0.26617
		APTX	0.0710653	-0.462045
		AQP11	0.226569	-0.16119
		AQP3	-0.432769	-0.142595
		AQP6	0.628547	-0.206766
		AQP9	-1.93004	-3.84203
		AQR	0.0106709	-0.055916
		AR	0.844573	-0.85518
		ARAF	-0.019363	-0.113021
		ARAP1	-0.219068	-7.37882
		ARAP2	-0.410065	-6.97881
		ARAP3	0.491465	-8.18842
		ARCN1	0.100614	-2.42526
		AREL1	0.0224742	-0.139234
		ARF1	0.111636	-3.92464
		ARF3	0.157922	-5.48678
		ARF4	0.042404	-0.412269
		ARF5	0.0688595	-0.65328
		ARF6	0.0347013	-0.375142
		ARFGAP1	0.0260024	-0.151471
		ARFGAP2	0.110508	-1.8912
		ARFGAP3	0.0559112	-0.400202
		ARFGEF1	0.0245708	-0.149911
		ARFGEF2	0.0704917	-0.479256
		ARFIP1	0.140374	-2.62423
		ARFIP2	0.0990783	-0.986842
		ARFRP1	-0.0036247	-0.0108921
		ARG2	0.413828	-5.89279
		ARGLU1	-0.0727988	-0.828256
		ARHGAP1	-0.048856	-0.38461
		ARHGAP10	-0.39268	-7.00877
		ARHGAP11A	-0.10586	-2.52199
		ARHGAP11B	-0.105552	-0.373216
		ARHGAP12	-0.0702191	-0.596326
		ARHGAP15	0.151908	-2.07791
		ARHGAP17	0.113212	-2.03623
		ARHGAP18	0.0445002	-0.373503
		ARHGAP19	-0.0110709	-0.0590911
		ARHGAP20	-0.518511	-5.48945
		ARHGAP21	0.338368	-11.2882
		ARHGAP22	1.19645	-21.4711
		ARHGAP23	1.8446	0
		ARHGAP24	0.0277725	-0.0541752
		ARHGAP25	-0.0976808	-1.33183
		ARHGAP26	-0.0085376	-0.0390554
		ARHGAP27	-0.0309704	-0.205
		ARHGAP28	-1.56516	-1.14266
		ARHGAP30	0.0553948	-0.717438
		ARHGAP31	0.436962	-26.4377
		ARHGAP32	-0.346228	-1.97684
		ARHGAP33	-0.189715	-1.48284
		ARHGAP35	0.16271	-2.78644
		ARHGAP39	0.739919	-2.53179
		ARHGAP4	-0.0732776	-1.22245
		ARHGAP42	-0.0311931	-0.0725691
		ARHGAP44	-1.5151	-2.16515
		ARHGAP5	0.0514405	-0.38301
		ARHGAP5-AS1	0.369584	-0.468165
		ARHGAP6	-0.207289	-0.519292
		ARHGAP9	0.10207	-1.75122
		ARHGDIA	-0.0333635	-0.298821
		ARHGDIB	-0.0186849	-0.144541
		ARHGEF1	0.00224495	-0.0100281
		ARHGEF10	-0.363792	-2.01978
		ARHGEF10L	-0.251103	-5.5986
		ARHGEF11	-0.167422	-2.62835
		ARHGEF12	-0.530656	-18.3179
		ARHGEF16	-0.643464	-1.61194
		ARHGEF17	-0.0651959	-0.0787772
		ARHGEF18	-0.0304185	-0.160176
		ARHGEF19	0.203343	-0.360081
		ARHGEF2	-0.140134	-3.55474
		ARHGEF26	-1.32261	-1.24048
		ARHGEF3	-0.286916	-11.1884
		ARHGEF33	-1.13031	-1.20396
		ARHGEF34P	-0.706218	-1.94609
		ARHGEF35	-0.508172	-0.575752
		ARHGEF37	0.063496	-0.092401
		ARHGEF39	-0.0970624	-0.864442
		ARHGEF40	0.0815285	-1.20136
		ARHGEF5	-0.644348	-3.63401
		ARHGEF6	0.147008	-3.43545
		ARHGEF7	-0.0369359	-0.230159
		ARHGEF9	-0.0993393	-0.760202
		ARID1A	0.189828	-1.13289
		ARID1B	0.0891663	-0.614877
		ARID2	0.0808588	-0.500942
		ARID3A	0.0642554	-0.463374
		ARID3B	0.0397544	-0.230946
		ARID4A	-0.0060466	-0.0224434
		ARID4B	0.0010627	-0.00338699
		ARID5A	0.00145915	-0.00568089
		ARID5B	-0.0827776	-0.392752
		ARIH1	0.0179361	-0.106511
		ARIH2	0.0525498	-0.559082
		ARIH2OS	0.218276	-0.197927
		ARL1	-0.0509305	-0.446056
		ARL10	0.0660995	-0.0813888
		ARL11	0.0798157	-0.597335
		ARL13B	-0.197614	-2.50902
		ARL14EP	-0.0323988	-0.104103
		ARL15	0.114443	-0.661168
		ARL16	0.00148435	-0.00380422
		ARL17A	0.380364	-1.73023
		ARL2	-0.159903	-0.411977
		ARL2BP	-0.0095879	-0.0532972
		ARL3	0.0426933	-0.164995
		ARL4A	-0.0887527	-0.370606
		ARL4C	-1.09344	-32.5817
		ARL4D	-0.0097253	-0.0102702
		ARL5A	0.0280217	-0.169321
		ARL5B	-0.0231183	-0.0796019
		ARL6	0.022537	-0.0247485
		ARL6IP1	-0.0424657	-0.523887
		ARL6IP4	-0.034631	-0.263179
		ARL6IP5	0.10767	-1.83857
		ARL6IP6	-0.271105	-2.63625
		ARL8A	-0.16422	-2.76071
		ARL8B	0.0164666	-0.135311
		ARMC1	-0.0652038	-0.531385
		ARMC10	-0.068744	-0.431496
		ARMC12	1.22674	0
		ARMC2	0.0249242	-0.0326121
		ARMC4	-1.5583	0
		ARMC5	0.00339076	-0.00831665
		ARMC6	0.0815127	-0.839143
		ARMC7	0.0876886	-0.512604
		ARMC8	-0.120108	-1.84055
		ARMC9	-0.169353	-0.331086
		ARMCX1	-0.283852	-5.66555
		ARMCX2	-0.41371	-5.451
		ARMCX3	-0.0850699	-1.13553
		ARMCX4	0.0857408	-0.305012
		ARMCX5	-0.0703757	-0.290864
		ARMCX5-GPRASP2	-0.235527	-0.21172
		ARMCX6	0.0109354	-0.0369708
		ARNT	-0.0220433	-0.14122
		ARNTL	0.243707	-4.4828
		ARNTL2	-0.105756	-0.729956
		ARPC1A	0.0899897	-1.2032
		ARPC1B	-0.0031874	-0.0209196
		ARPC2	-0.0454062	-0.581096
		ARPC3	0.0272108	-0.190666
		ARPC4	0.075387	-1.20271
		ARPC5	-0.0924686	-1.85788
		ARPC5L	0.0352851	-0.231115
		ARPP19	0.0433482	-0.463626
		ARRB1	0.247705	-14.9066
		ARRB2	0.0439305	-0.5659
		ARRDC1	0.102966	-0.679537
		ARRDC2	0.0630876	-0.405083
		ARRDC3	-0.17281	-2.81996
		ARRDC3-AS1	0.662141	-1.64301
		ARRDC4	0.150134	-1.60419
		ARRDC5	0.547684	-0.157746
		ARSA	-0.115978	-1.41197
		ARSB	-0.147331	-2.84371
		ARSD	-0.118621	-1.23286
		ARSG	-0.308013	-1.50764
		ARSK	-0.28904	-1.70398
		ARV1	0.0597118	-0.260351
		ARVCF	-0.132195	-0.25899
		ASAH1	-0.272326	-18.3116
		ASAH2	-0.123083	-0.0425757
		ASAH2B	0.175538	-0.168506
		ASAP1	-0.0242585	-0.116682
		ASAP1-IT2	-0.725066	0
		ASAP2	-1.97521	-14.52
		ASAP3	0.4258	-0.25244
		ASB1	-0.119552	-1.94168
		ASB11	-0.302928	0
		ASB12	0.137376	-0.0347118
		ASB13	-0.0282558	-0.103407
		ASB14	-0.977182	-1.36086
		ASB16	1.10491	-0.423533
		ASB16-AS1	-0.174773	-0.689926
		ASB2	-0.561381	-9.47366
		ASB3	-0.725258	-0.746662
		ASB6	0.079524	-0.518941
		ASB7	0.0242261	-0.107432
		ASB8	0.0134362	-0.0620614
		ASB9	-0.194662	-0.116685
		ASCC1	-0.047421	-0.23321
		ASCC2	0.00749239	-0.0423051
		ASCC3	-0.0142662	-0.0686096
		ASCL1	1.49007	0
		ASCL2	0.13743	-0.284496
		ASCL4	1.03479	-0.463988
		ASF1A	0.0430815	-0.183598
		ASF1B	-0.200413	-7.31515
		ASGR1	0.056996	-0.024317
		ASGR2	0.65697	-71.3536
		ASH1L	0.271976	-3.45978
		ASH1L-AS1	0.995261	-2.89279
		ASH2L	-0.148253	-3.12621
		ASIC1	-0.520822	-2.33368
		ASIC3	-0.538049	-0.914084
		ASIP	-1.86351	-3.9113
		ASL	-0.0048957	-0.0214162
		ASMTL	0.898146	-0.148128
		ASMTL-AS1	-0.367545	-0.214194
		ASNA1	0.0884511	-1.2209
		ASNS	0.571565	-5.50446
		ASNSD1	-0.0714411	-0.588611
		ASPH	0.0189048	-0.116682
		ASPHD1	-0.38662	-1.44927
		ASPHD2	0.0428081	-0.0676908
		ASPM	0.0605642	-0.422418
		ASPRV1	0.169512	-0.0624553
		ASPSCR1	-0.0569424	-0.253461
		ASRGL1	-0.521481	-18.3478
		ASS1	0.0366777	-0.0337508
		ASTE1	-0.133853	-0.530268
		ASTN2	-0.358509	-1.73591
		ASUN	-0.0312327	-0.152689
		ASXL1	0.161317	-3.62079
		ASXL2	0.0992291	-0.809818
		ATAD1	-0.121899	-1.89067
		ATAD2	-0.308064	-16.8097
		ATAD2B	0.200006	-2.83899
		ATAD3A	0.0130446	-0.0549355
		ATAD3B	0.0592701	-0.32383
		ATAD3C	0.738136	0
		ATAD5	-0.229134	-3.52828
		ATAT1	0.158535	-0.444425
		ATE1	0.00650259	-0.029914
		ATE1-AS1	1.20388	0
		ATF1	0.0109165	-0.0340506
		ATF2	0.0322263	-0.23585
		ATF3	-0.538195	-1.34541
		ATF4	0.227629	-11.6108
		ATF5	-0.119521	-1.38398
		ATF6	-0.101075	-1.75603
		ATF6B	0.107223	-2.02656
		ATF7	0.0197732	-0.0681464
		ATF7IP	-0.0275293	-0.127169
		ATF7IP2	0.183309	-1.08479
		ATG10	-0.243673	-1.93673
		ATG101	0.0851898	-0.510178
		ATG12	0.0354409	-0.19631
		ATG13	0.0691761	-0.729837
		ATG14	0.08068	-0.414606
		ATG16L1	0.0430236	-0.201795
		ATG16L2	-0.181505	-3.11586
		ATG2A	-0.009954	-0.0302084
		ATG2B	0.0328618	-0.120457
		ATG3	-0.0224482	-0.153089
		ATG4A	-0.0859417	-0.38127
		ATG4B	0.0461856	-0.33522
		ATG4C	0.0523072	-0.406323
		ATG4D	-0.0365279	-0.112894
		ATG5	-0.0082751	-0.0361735
		ATG7	-0.193526	-6.47625
		ATG9A	-0.0570481	-0.322063
		ATG9B	-0.856101	-0.340482
		ATHL1	0.269421	-2.98738
		ATIC	0.0387267	-0.312688
		ATL1	-0.453009	-0.404112
		ATL2	-0.0636419	-0.655037
		ATL3	-0.189748	-2.48412
		ATM	0.102904	-0.294817
		ATMIN	0.0751986	-0.8838
		ATN1	0.118619	-0.925551
		ATOH8	-1.37059	-17.5317
		ATOX1	-0.181574	-2.77714
		ATP10A	-0.107984	-0.499549
		ATP10D	0.0437414	-0.292976
		ATP11A	0.135345	-1.42601
		ATP11B	0.0191847	-0.095035
		ATP11C	0.114392	-1.00851
		ATP12A	0.578389	-0.213653
		ATP13A1	-0.0559195	-0.529729
		ATP13A2	0.38201	-10.6402
		ATP13A3	0.161752	-3.92702
		ATP13A4	-0.0327308	-0.0065644
		ATP1A1	-0.0499707	-0.725838
		ATP1A1-AS1	-0.000617	-0.000369046
		ATP1A3	0.412652	-0.123128
		ATP1B1	-0.204771	-6.84164
		ATP1B2	0.661091	0
		ATP1B3	-0.0567724	-0.735923
		ATP2A1	-0.0585765	-0.0480239
		ATP2A2	-0.0284195	-0.263801
		ATP2A3	0.234594	-8.88273
		ATP2B1	0.0738439	-0.975392
		ATP2B3	0.398602	-0.099393
		ATP2B4	0.105973	-0.940101
		ATP2C1	-0.0989528	-2.29546
		ATP5A1	0.075202	-1.17856
		ATP5B	0.0108221	-0.076238
		ATP5C1	0.0716093	-0.867895
		ATP5D	0.0362242	-0.202343
		ATP5E	0.0118035	-0.0116892
		ATP5EP2	-0.629089	-0.237155
		ATP5F1	0.0356399	-0.301348
		ATP5G1	0.0733067	-0.535628
		ATP5G2	0.0940739	-1.28527
		ATP5G3	-0.0540872	-0.621008
		ATP5H	0.0644098	-0.546473
		ATP5I	0.102935	-0.906287
		ATP5J	0.0451131	-0.317739
		ATP5J2	0.045078	-0.156986
		ATP5L	0.0274147	-0.163848
		ATP5O	-0.0337555	-0.231588
		ATP5S	0.0151655	-0.0345208
		ATP5SL	0.0829887	-0.869085
		ATP6AP1	-0.0394532	-0.462701
		ATP6AP1L	-0.0496169	-0.0176074
		ATP6AP2	-0.206392	-7
		ATP6V0A1	0.0750166	-1.22904
		ATP6V0A2	-0.0334532	-0.179271
		ATP6V0B	-0.0439008	-0.424561
		ATP6V0C	-0.168761	-5.04383
		ATP6V0D1	-0.0704433	-0.993305
		ATP6V0D2	-0.922081	-23.3125
		ATP6V0E1	-0.106394	-1.75175
		ATP6V0E2	-0.193749	-2.54862
		ATP6V0E2-AS1	-0.282141	-0.49088
		ATP6V1A	-0.0058289	-0.0350919
		ATP6V1B2	-0.182627	-10.2048
		ATP6V1C1	-0.0159921	-0.121439
		ATP6V1C2	-0.546581	-0.493293
		ATP6V1D	-0.104489	-1.20043
		ATP6V1E1	-0.0874769	-0.930852
		ATP6V1E2	0.0371467	-0.0427808
		ATP6V1F	0.0860276	-1.31289
		ATP6V1G1	0.0135663	-0.0865138
		ATP6V1G2	1.08882	-0.671012
		ATP6V1H	-0.112136	-2.23028
		ATP7A	-0.0429078	-0.267467
		ATP7B	0.0637383	-0.120753
		ATP8A1	0.361186	-6.01909
		ATP8A2	-0.202281	-0.137576
		ATP8B1	-0.65878	-2.47692
		ATP8B2	0.656141	-9.99568
		ATP8B3	0.0944611	-0.133331
		ATP8B4	0.0635757	-0.800838
		ATP8B5P	-0.386394	-0.100255
		ATP9A	-0.547669	-4.78516
		ATP9B	-0.243736	-4.5867
		ATPAF1	-0.101723	-1.06858
		ATPAF2	0.167762	-2.88548
		ATPIF1	0.108597	-1.52432
		ATR	-0.0329574	-0.182993
		ATRAID	-0.153779	-2.97265
		ATRIP	-0.166908	-1.36876
		ATRN	0.081454	-1.04514
		ATRNL1	-2.18858	-1.76053
		ATRX	0.139104	-1.39127
		ATXN1	0.0408298	-0.179271
		ATXN10	-0.003268	-0.0175397
		ATXN1L	0.107437	-1.36086
		ATXN2	-0.0180832	-0.0585559
		ATXN2L	0.0201356	-0.113021
		ATXN3	0.151911	-1.15625
		ATXN7	0.0802244	-0.477741
		ATXN7L1	0.209998	-1.69835
		ATXN7L2	0.0693382	-0.17537
		ATXN7L3	0.100181	-1.41602
		ATXN7L3B	0.154923	-3.61827
		AUH	0.0473162	-0.0997675
		AUNIP	0.0319907	-0.0858265
		AUP1	-0.054853	-0.709561
		AURKA	-0.0020602	-0.0118394
		AURKAIP1	0.0296021	-0.166016
		AURKAPS1	0.210528	-0.140973
		AURKB	-0.0633174	-0.669572
		AURKC	-1.04917	-4.16813
		AUTS2	-1.94035	-1.96375
		AVEN	-0.0754031	-0.263801
		AVIL	-0.308481	-0.533014
		AVL9	0.0787788	-0.573098
		AVPI1	-0.0422036	-0.0511646
		AXIN1	0.014253	-0.0476888
		AXIN2	-0.192991	-0.107022
		AXL	0.0128727	-0.0995631
		AZI2	-0.0851612	-0.625796
		AZIN1	-0.069091	-0.905373
		AZU1	-0.13849	-0.0796019
		B2M	-0.135714	-4.15864
		B3GALNT1	-0.200102	-2.92388
		B3GALNT2	0.0309008	-0.177284
		B3GALT4	0.0925568	-0.211016
		B3GALT6	0.0454077	-0.241831
		B3GALTL	-0.449806	-9.75449
		B3GAT2	1.44486	-0.672708
		B3GAT3	-0.23949	-4.56384
		B3GNT1	-0.120239	-0.590501
		B3GNT2	-0.169358	-3.00133
		B3GNT5	0.303104	-17.6696
		B3GNT7	0.00888793	-0.0106967
		B3GNT8	-1.28843	-29.4763
		B3GNT9	-0.63645	-5.46344
		B3GNTL1	-0.138675	-0.669957
		B4GALNT1	-0.762809	-0.448106
		B4GALNT3	-0.789494	-1.06694
		B4GALT1	-0.0156547	-0.106508
		B4GALT1-AS1	-0.497556	-0.363579
		B4GALT2	-0.293363	-2.50402
		B4GALT3	0.0512004	-0.321814
		B4GALT4	-0.0457556	-0.224717
		B4GALT5	-0.131673	-2.09744
		B4GALT6	-0.497833	-3.4232
		B4GALT7	-0.213787	-2.88604
		B9D1	0.199031	-0.099991
		B9D2	0.103965	-0.209158
		BAAT	0.254414	0
		BABAM1	0.151698	-2.89171
		BACE1	-0.381958	-21.3979
		BACE1-AS	-0.0730602	-0.0691929
		BACE2	-0.76661	-32.6946
		BACH1	0.130806	-3.14661
		BACH2	-0.0441532	-0.0458663
		BAD	-0.0383038	-0.1035
		BAG1	0.0209849	-0.139604
		BAG2	-0.0272633	-0.121154
		BAG3	0.0209032	-0.114897
		BAG4	-0.0237981	-0.113839
		BAG5	0.0332191	-0.244627
		BAG6	0.0219506	-0.195018
		BAHCC1	-0.877491	-1.39057
		BAHD1	-0.0089056	-0.0378793
		BAI1	-0.953534	-0.325696
		BAIAP2	-0.0667357	-0.350008
		BAIAP2-AS1	0.159881	-1.65296
		BAIAP2L1	0.0127569	-0.00377066
		BAIAP3	0.186793	-0.0944447
		BAK1	0.0956385	-1.18951
		BAMBI	0.178905	-0.0888071
		BANF1	0.0472394	-0.424186
		BANK1	0.551742	-12.8729
		BANP	0.00413391	-0.00953678
		BAP1	0.0244749	-0.157632
		BARD1	-0.15483	-2.53858
		BASP1	-0.213279	-2.14716
		BATF	-0.456415	-2.8164
		BATF2	-1.0076	-3.97058
		BATF3	0.221376	-0.327026
		BAX	0.110426	-1.768
		BAZ1A	-0.0259915	-0.166818
		BAZ1B	-0.0566003	-0.48178
		BAZ2A	0.231994	-4.00174
		BAZ2B	0.0502214	-0.26643
		BBC3	0.173569	-0.93659
		BBIP1	0.208396	-1.14388
		BBS1	0.102653	-0.298314
		BBS10	-0.0654661	-0.253276
		BBS12	0.0356572	-0.058055
		BBS2	-0.128149	-0.889624
		BBS4	-0.001376	-0.0031524
		BBS5	-0.255305	-0.957529
		BBS7	-0.0809914	-0.407705
		BBS9	0.0907247	-0.219883
		BBX	0.0134986	-0.0512547
		BCAM	-0.0491661	-0.0565361
		BCAN	-0.378624	-2.32475
		BCAP29	-0.19219	-4.04528
		BCAP31	-0.177557	-5.80967
		BCAR1	-0.751393	-3.9113
		BCAR3	0.311386	-2.75336
		BCAS2	-0.0333859	-0.171032
		BCAS3	0.0740466	-0.232584
		BCAS4	0.472091	-0.236742
		BCAT1	0.344439	-9.37675
		BCAT2	0.237486	-4.0846
		BCCIP	0.0846037	-0.745941
		BCDIN3D	0.262572	-1.50246
		BCDIN3D-AS1	0.689685	-0.313904
		BCKDHA	-0.0927984	-0.978006
		BCKDHB	-0.0092515	-0.0255292
		BCKDK	0.0768826	-0.958027
		BCL10	-0.021177	-0.0925747
		BCL11A	-0.481182	-0.682677
		BCL2	0.0506208	-0.225846
		BCL2A1	-1.48769	-42.0947
		BCL2L1	0.18685	-7.07314
		BCL2L11	-0.0326077	-0.107254
		BCL2L12	0.0960807	-0.761035
		BCL2L13	0.0417911	-0.307002
		BCL2L15	0.0570316	-0.0222101
		BCL2L2	-0.026426	-0.12823
		BCL3	-0.191267	-0.590824
		BCL6	0.071357	-0.348496
		BCL7A	-0.280048	-3.19228
		BCL7B	-0.0860971	-0.801306
		BCL7C	-0.0577982	-0.259543
		BCL9	0.284777	-2.92438
		BCL9L	0.0539918	-0.284201
		BCLAF1	0.0173122	-0.124286
		BCO2	-0.0949504	-0.10979
		BCOR	0.114545	-1.63113
		BCORL1	-0.097257	-0.246776
		BCR	0.0774365	-0.467071
		BCRP3	0.224218	0
		BCS1L	-0.0914701	-0.471196
		BDH1	0.172509	-2.61645
		BDH2	-0.153026	-1.15862
		BDNF-AS	-0.1937	-0.160207
		BDP1	0.118689	-0.8774
		BEAN1	-1.36616	-1.10907
		BECN1	0.0336136	-0.252121
		BEND3	-0.137948	-0.439375
		BEND6	0.242461	-0.246152
		BEND7	-0.327274	-0.0776233
		BEST1	-0.0870339	-0.46031
		BEST4	0.629159	0
		BET1	0.20864	-1.84018
		BET1L	0.14123	-2.87601
		BEX1	-1.05565	-0.717438
		BEX2	-0.598288	-0.510742
		BEX4	0.0245999	-0.146068
		BEX5	-0.437348	-0.219883
		BFAR	0.0757907	-0.801188
		BFSP1	-0.697642	-0.645072
		BGLAP	1.87771	0
		BHLHB9	-0.0919596	-0.259914
		BHLHE40	-0.359622	-16.8097
		BHLHE41	0.706373	-106.907
		BICC1	0.0709208	-0.0597702
		BICD1	0.0032772	-0.00621642
		BICD2	0.10755	-2.18083
		BID	0.0749771	-1.00765
		BIK	0.148566	-0.272321
		BIN1	0.942218	-171.343
		BIN2	0.210096	-9.22768
		BIN3	0.0178801	-0.0654258
		BIN3-IT1	1.58281	0
		BIRC2	-0.0114997	-0.0568338
		BIRC3	0.285628	-0.514542
		BIRC5	0.113855	-2.42126
		BIRC6	0.252516	-0.542005
		BIRC7	-0.620636	-8.43415
		BIVM	-0.226273	-1.52397
		BLCAP	0.103137	-1.25436
		BLM	-0.251791	-4.45346
		BLMH	-0.0096391	-0.0483157
		BLNK	0.0497457	-0.440462
		BLOC1S1	-0.0573728	-0.126802
		BLOC1S2	-0.0526397	-0.390137
		BLOC1S3	0.057739	-0.282541
		BLOC1S4	0.213654	-1.41529
		BLOC1S6	-0.0117563	-0.0725633
		BLVRA	0.203579	-2.08636
		BLVRB	-0.0675748	-0.576385
		BLZF1	-0.111732	-0.586213
		BMF	0.0513007	-0.517575
		BMI1	-0.43486	-0.770084
		BMP1	-0.262689	-1.33963
		BMP2	-1.51883	-2.10859
		BMP2K	0.195714	-2.88308
		BMP4	-2.86056	-2.43941
		BMP6	-0.41271	-0.280072
		BMP8A	1.04448	-3.8197
		BMP8B	0.220362	-0.397389
		BMPR1A	-0.0578613	-0.335717
		BMPR2	0.205722	-3.78383
		BMS1	0.082141	-1.04025
		BMS1P20	0.0456939	-0.210837
		BMS1P4	0.121041	-0.355038
		BMS1P5	-0.383029	-0.314734
		BMS1P6	0.751151	-1.04054
		BNC2	0.105297	-0.759728
		BNIP1	0.127943	-0.527573
		BNIP2	0.00248782	-0.0142894
		BNIP3	-0.255481	-1.73906
		BNIP3L	0.0362856	-0.280052
		BNIPL	0.380022	-0.294173
		BOC	1.22969	-0.654298
		BOD1	-0.0243489	-0.0809394
		BOD1L1	0.140959	-1.42617
		BOK	0.13131	-0.0921296
		BOLA1	0.0809178	-0.175983
		BOLA3	-0.146689	-1.31373
		BOLA3-AS1	-0.0806576	-0.0820614
		BOP1	0.293709	-1.3256
		BORA	-0.0120316	-0.0551517
		BPGM	-0.0620703	-0.254637
		BPHL	0.0206012	-0.059037
		BPNT1	-0.0512932	-0.282369
		BPTF	0.205461	-2.86198
		BRAF	0.19817	-1.34198
		BRAP	0.0675801	-0.495652
		BRAT1	0.0258371	-0.136179
		BRCA1	-0.246942	-6.39362
		BRCA2	-0.114463	-0.399895
		BRCC3	-0.0473069	-0.329554
		BRD1	0.0411166	-0.244149
		BRD2	0.0650743	-0.896242
		BRD3	0.0559714	-0.323028
		BRD4	0.179716	-2.03518
		BRD7	-0.0968715	-1.05629
		BRD8	-0.106039	-1.36913
		BRD9	0.0154683	-0.0731223
		BRE	-0.179657	-2.78441
		BRE-AS1	-0.807932	0
		BREA2	0.465353	-0.174375
		BRF1	0.0415434	-0.184834
		BRF2	0.00561609	-0.0155031
		BRI3	-0.0135818	-0.0633987
		BRI3BP	0.0613895	-0.339329
		BRICD5	0.0571911	-0.102776
		BRINP2	-4.08275	0
		BRIP1	-0.210008	-3.88961
		BRIX1	-0.0530974	-0.331405
		BRK1	0.0827858	-1.10307
		BRMS1	0.0858382	-0.798381
		BRMS1L	-0.122051	-0.887191
		BROX	0.0872517	-1.21281
		BRPF1	0.0271616	-0.154557
		BRPF3	-0.0726217	-0.457026
		BRSK1	-0.277005	-0.169321
		BRSK2	-0.476947	-0.281873
		BRWD1	0.0771427	-0.521268
		BRWD1-IT2	-0.0976292	-0.0239193
		BRWD3	0.128891	-0.910182
		BSCL2	0.172716	-0.145637
		BSDC1	0.0636407	-0.464818
		BSG	-0.130892	-3.80568
		BSN	-1.27126	-2.11785
		BSPRY	0.541056	0
		BST1	-0.441705	-2.03585
		BST2	-0.115307	-2.39766
		BTAF1	-0.0885362	-0.708782
		BTBD1	-0.0026018	-0.0127223
		BTBD10	-0.105213	-1.03122
		BTBD19	0.10173	-0.224405
		BTBD2	0.0516847	-0.275187
		BTBD3	0.217904	-5.01502
		BTBD6	-0.102433	-0.968966
		BTBD7	0.210426	-4.40012
		BTBD8	-0.238341	-0.153089
		BTBD9	0.0902478	-0.50952
		BTD	-0.0395793	-0.128318
		BTF3	0.135291	-2.20261
		BTF3L4	0.025889	-0.168878
		BTG1	-0.0654281	-0.524894
		BTG2	-0.354012	-31.1379
		BTG3	-0.386742	-6.28567
		BTK	0.0151613	-0.099991
		BTN2A1	-0.0796054	-0.657578
		BTN2A2	0.241342	-1.54165
		BTN2A3P	-0.100636	-0.164395
		BTN3A1	-0.198912	-1.28152
		BTN3A2	-0.0838583	-0.512524
		BTN3A3	-0.119326	-0.170512
		BTRC	-0.0751494	-0.48178
		BUB1	-0.0649085	-0.882503
		BUB1B	-0.141123	-4.28819
		BUB3	-0.126218	-2.84155
		BUD13	-0.0620871	-0.339329
		BUD31	0.0279337	-0.14474
		BVES	0.106124	-1.30214
		BVES-AS1	-0.292506	-0.462045
		BYSL	0.136818	-1.10003
		BZRAP1	1.25788	-9.56384
		BZRAP1-AS1	0.226308	-1.13365
		BZW1	-0.0302053	-0.256344
		BZW2	0.198721	-3.84603
		C10orf10	-0.175873	-0.0802561
		C10orf11	-0.160236	-0.702323
		C10orf111	0.848754	0
		C10orf118	-0.0155769	-0.0622202
		C10orf12	0.333252	-0.655015
		C10orf128	0.575055	-10.4157
		C10orf131	0.815009	-0.679458
		C10orf2	0.226383	-3.44985
		C10orf25	-0.995818	-2.66138
		C10orf32	0.114094	-0.730999
		C10orf35	-0.529832	-2.0424
		C10orf54	0.459131	-43.3969
		C10orf55	-0.335515	-0.122844
		C10orf76	0.027566	-0.185315
		C10orf88	-0.0947916	-0.316249
		C10orf90	-3.50058	-8.82974
		C10orf91	-0.244402	-0.0923184
		C10orf95	-0.78435	-0.654603
		C11orf1	-0.0398732	-0.0785739
		C11orf21	0.0793129	-0.531077
		C11orf24	-0.0690715	-0.421509
		C11orf30	-0.03935	-0.155356
		C11orf31	0.137454	-2.28328
		C11orf35	0.199286	-0.233865
		C11orf45	-0.0217561	-0.0686096
		C11orf48	0.0410434	-0.081335
		C11orf49	0.172805	-0.886203
		C11orf54	0.0403594	-0.165105
		C11orf57	0.185663	-3.2329
		C11orf58	-0.0185139	-0.100259
		C11orf63	-0.0138177	-0.0232765
		C11orf65	-0.764471	-0.746618
		C11orf68	0.163489	-1.26073
		C11orf71	0.289516	-1.48093
		C11orf73	0.0808137	-0.483489
		C11orf80	-0.0862037	-0.261941
		C11orf82	-0.186795	-2.41242
		C11orf83	0.120455	-0.567573
		C11orf84	0.0192682	-0.0788426
		C11orf94	0.908726	-0.273285
		C11orf95	0.428433	-4.93554
		C12orf10	0.103726	-0.650577
		C12orf29	-0.127109	-0.955724
		C12orf4	-0.176209	-2.76791
		C12orf43	0.141882	-1.1211
		C12orf45	-0.136581	-0.580117
		C12orf49	-0.0494186	-0.46637
		C12orf5	0.0242922	-0.163848
		C12orf56	0.28723	-0.0881052
		C12orf57	0.253715	-1.56218
		C12orf60	-0.271166	-0.4027
		C12orf61	-0.0345521	-0.0128712
		C12orf65	0.0375019	-0.117118
		C12orf66	-0.135426	-0.439116
		C12orf73	-0.0313414	-0.0624553
		C12orf75	0.488249	-40.3161
		C12orf76	0.473046	-2.11671
		C14orf1	0.179333	-5.46725
		C14orf119	0.148579	-2.66312
		C14orf132	-2.44727	0
		C14orf142	-0.186202	-1.46015
		C14orf159	-0.0771015	-0.889102
		C14orf166	0.0462978	-0.354861
		C14orf169	0.0738032	-0.41669
		C14orf178	0.540555	0
		C14orf182	0.266269	0
		C14orf2	0.00118006	-0.00381161
		C14orf28	-0.102594	-0.238233
		C14orf37	-1.02612	-12.6421
		C14orf79	0.0985146	-0.0646281
		C14orf80	0.0267969	-0.0967732
		C14orf93	0.0952553	-0.266167
		C15orf26	0.919156	-0.727347
		C15orf27	-1.08194	-3.00429
		C15orf37	-0.0961507	-0.228698
		C15orf38	0.0456786	-0.39535
		C15orf39	0.19148	-4.61618
		C15orf40	0.0131613	-0.0365157
		C15orf41	-0.181622	-0.85674
		C15orf48	-1.2381	-19.3546
		C15orf52	-0.67861	-1.8041
		C15orf56	-1.52297	-0.779413
		C15orf57	0.0283585	-0.108229
		C15orf61	-0.224331	-0.73717
		C15orf62	-0.189049	-0.078796
		C15orf65	-0.464064	0
		C16orf13	-0.0155969	-0.0531392
		C16orf45	-0.990569	-3.57971
		C16orf46	-0.094517	-0.0559719
		C16orf52	-0.0403148	-0.091217
		C16orf54	-0.279062	-2.4957
		C16orf58	-0.0735804	-0.702524
		C16orf59	-0.220335	-1.91827
		C16orf62	0.00544439	-0.0269758
		C16orf70	0.0218036	-0.123128
		C16orf71	-1.075	-1.14046
		C16orf72	0.084234	-0.958176
		C16orf74	-0.933073	0
		C16orf80	-0.0093863	-0.0307759
		C16orf86	0.260915	-0.263541
		C16orf87	-0.0121004	-0.032952
		C16orf89	0.37244	-0.422418
		C16orf91	0.267376	-1.65978
		C16orf93	-0.169024	-0.975057
		C16orf95	-0.232987	-0.459641
		C16orf96	0.339259	-0.275865
		C16orf98	0.549628	-1.13949
		C17orf100	2.08344	0
		C17orf103	0.0235199	-0.0439657
		C17orf104	0.0646421	-0.101845
		C17orf105	-0.020987	0
		C17orf107	-0.281713	-0.114832
		C17orf51	-0.0458192	-0.150296
		C17orf53	-0.013153	-0.0405572
		C17orf58	-0.200941	-1.0935
		C17orf59	0.0235649	-0.0686096
		C17orf62	-0.057882	-0.590701
		C17orf64	-0.559557	0
		C17orf67	0.0853462	-0.120322
		C17orf70	-0.0015728	-0.00456114
		C17orf75	-0.18049	-1.44275
		C17orf80	-0.0132201	-0.0446956
		C17orf85	-0.0114509	-0.0632628
		C17orf89	0.0004809	-0.00116494
		C17orf96	-0.431577	-1.19404
		C17orf97	-0.359383	-0.505508
		C18orf21	0.0808472	-0.280323
		C18orf25	-0.0163955	-0.0647945
		C18orf32	-0.343932	-0.419183
		C18orf54	-0.145339	-1.49274
		C18orf8	-0.0844623	-0.560622
		C19orf10	0.0398051	-0.332909
		C19orf12	-0.0069849	-0.0234202
		C19orf18	0.144405	-0.0388002
		C19orf24	-0.0194407	-0.0726778
		C19orf25	0.100135	-0.701415
		C19orf26	0.305679	-0.179271
		C19orf35	0.0386942	-0.0961299
		C19orf38	-0.18486	-0.964427
		C19orf40	-0.129043	-0.451226
		C19orf43	-0.0327132	-0.195699
		C19orf44	-0.267155	-0.319208
		C19orf47	0.0287184	-0.0788085
		C19orf48	-0.0011552	-0.0041196
		C19orf52	0.15191	-0.973366
		C19orf53	0.0691172	-0.524537
		C19orf54	0.00936005	-0.0288043
		C19orf55	-0.138435	-0.614446
		C19orf57	-0.419034	-1.45288
		C19orf60	-0.0876893	-0.690483
		C19orf66	-0.0811174	-0.45969
		C19orf68	-0.0140048	-0.0326101
		C19orf70	0.0412906	-0.195659
		C19orf71	-0.061573	-0.0168779
		C19orf73	0.117776	-0.045559
		C19orf81	0.334433	-0.442586
		C19orf82	0.0840818	-0.139291
		C19orf83	0.0404296	-0.0229111
		C19orf84	0.4857	-0.212386
		C1D	-0.0568437	-0.275241
		C1GALT1	-0.114237	-1.03759
		C1GALT1C1	-0.164703	-2.11746
		C1orf101	-0.711408	-0.689323
		C1orf106	0.0949389	-0.222331
		C1orf109	0.135501	-0.968422
		C1orf112	-0.084404	-0.556476
		C1orf115	0.196855	-0.946814
		C1orf116	-0.736146	-0.324898
		C1orf122	-0.230172	-2.86592
		C1orf123	-0.0225451	-0.0830831
		C1orf127	-0.0337684	-0.0844082
		C1orf131	0.0279887	-0.0860873
		C1orf145	0.563619	-0.325575
		C1orf159	-0.0472506	-0.12912
		C1orf162	0.336202	-5.24795
		C1orf167	-1.95188	-0.749969
		C1orf174	0.0450414	-0.256963
		C1orf186	0.172521	-0.0611315
		C1orf189	0.456687	0
		C1orf192	-1.0926	-0.414202
		C1orf198	-0.0574505	-0.313904
		C1orf200	0.0777691	-0.0786258
		C1orf204	-0.461125	-0.406323
		C1orf21	-1.60655	-27.1518
		C1orf213	0.133026	-0.0915515
		C1orf216	0.0799898	-0.321478
		C1orf220	-0.242611	-0.0680262
		C1orf226	-0.563313	-0.29056
		C1orf228	0.0955283	-0.0568606
		C1orf233	-0.223985	-1.82315
		C1orf27	-0.0556234	-0.363161
		C1orf35	-0.0269618	-0.0921336
		C1orf43	0.0575186	-1.00376
		C1orf50	0.155175	-0.789559
		C1orf52	0.0756877	-0.351611
		C1orf53	-0.413646	-0.694907
		C1orf54	-0.300595	-2.11561
		C1orf56	0.386507	-0.995439
		C1orf61	1.77108	-1.02569
		C1orf74	-0.0817575	-0.198141
		C1orf85	-0.100184	-1.32586
		C1orf86	0.0131642	-0.0404676
		C1QA	0.0188342	-0.118166
		C1QB	-0.322641	-29.7033
		C1QBP	0.0766384	-0.680489
		C1QC	-0.0980578	-2.8634
		C1QL1	-0.671302	-0.19631
		C1QTNF2	-1.04342	-0.434365
		C1QTNF3	-0.324587	-0.434801
		C1QTNF3-AMACR	0.860995	0
		C1QTNF6	-0.578377	-0.711197
		C1QTNF9B-AS1	0.00101886	-0.000723159
		C1R	-0.974988	-0.409399
		C1RL	0.0417143	-0.164995
		C1RL-AS1	0.371071	-0.958176
		C1S	0.888862	-0.61813
		C2	-0.48916	-33.9393
		C20orf194	0.111152	-1.08733
		C20orf196	0.110496	-0.303038
		C20orf197	0.525569	-10.0205
		C20orf203	-0.123461	-0.0633944
		C20orf24	-0.158364	-1.01508
		C20orf26	0.50288	0
		C20orf27	0.155935	-2.74953
		C20orf96	-0.0274213	-0.0737104
		C21orf119	1.04528	0
		C21orf2	-0.080637	-0.280679
		C21orf33	0.00730005	-0.0354468
		C21orf49	-0.830437	-0.776175
		C21orf58	-0.0799944	-0.390287
		C21orf59	0.03745	-0.158391
		C21orf67	-0.253319	-0.432603
		C21orf90	1.4663	-5.47108
		C21orf91	0.120549	-0.436528
		C22orf23	-0.638195	0
		C22orf24	-0.216138	-0.112513
		C22orf29	-0.12016	-1.19703
		C22orf39	0.128471	-1.09388
		C22orf42	1.06011	-0.754405
		C22orf46	-0.136382	-1.10545
		C2CD2	-0.0089383	-0.0170454
		C2CD2L	-0.144578	-2.91088
		C2CD3	-0.181792	-2.31013
		C2CD4C	0.22947	0
		C2CD5	-0.147787	-2.8935
		C2orf15	-0.624244	-1.03217
		C2orf27A	0.0653805	-0.0736437
		C2orf27B	-1.50939	0
		C2orf42	-0.0194546	-0.0420017
		C2orf43	-0.0159213	-0.0660872
		C2orf44	-0.0102352	-0.0350919
		C2orf47	0.111773	-0.528187
		C2orf48	0.0141925	-0.00827859
		C2orf49	-0.0059747	-0.018874
		C2orf61	-0.0195244	-0.00338699
		C2orf68	0.132493	-1.23238
		C2orf69	-0.131378	-1.24048
		C2orf74	-0.373406	-3.99568
		C2orf76	0.102226	-0.210627
		C2orf81	0.562177	-0.522047
		C2orf82	-0.0996751	0
		C2orf88	-1.14022	-0.652485
		C2orf91	-0.0890282	-0.116059
		C3	0.345951	-27.71
		C3AR1	-0.0742118	-1.03238
		C3orf14	-0.258398	-2.77129
		C3orf17	0.0354899	-0.198609
		C3orf18	0.297897	-0.878934
		C3orf20	1.90263	-0.822584
		C3orf33	-0.195256	-0.466742
		C3orf35	-0.187308	-0.0764444
		C3orf38	-0.0656229	-0.47295
		C3orf52	0.0873076	-0.0359205
		C3orf58	0.193403	-4.00524
		C3orf62	-0.0101642	-0.0287304
		C3orf67	-0.238182	-0.151708
		C3orf70	-0.325013	-2.06665
		C3orf80	-3.2504	0
		C4orf27	-0.15978	-1.20824
		C4orf29	0.0257825	-0.0790627
		C4orf3	0.0948258	-1.0894
		C4orf32	0.225693	-1.17505
		C4orf33	-0.16997	-1.74379
		C4orf36	1.02714	-0.517102
		C4orf46	-0.0149805	-0.0686096
		C4orf48	-0.0296564	-0.0630712
		C5	-0.171808	-1.08668
		C5AR1	-0.226266	-4.8962
		C5AR2	0.152469	-0.397812
		C5orf15	0.0493924	-0.298314
		C5orf20	0.378223	-7.5986
		C5orf22	-0.0002556	-0.00111648
		C5orf24	0.0546586	-0.322678
		C5orf27	-0.176041	0
		C5orf28	-0.139454	-0.630909
		C5orf30	-0.0856023	-0.321047
		C5orf34	-0.242451	-1.67316
		C5orf42	-0.137536	-0.762024
		C5orf45	0.0142094	-0.0234202
		C5orf51	0.0715717	-0.714695
		C5orf55	0.367642	-1.92901
		C5orf56	-0.604225	-0.553899
		C5orf64	-0.022883	-0.0156971
		C5orf66	-0.310082	-0.149137
		C6orf1	0.0169592	-0.0676908
		C6orf106	0.00248438	-0.0144265
		C6orf120	0.108128	-1.38381
		C6orf136	-0.168768	-1.36086
		C6orf147	-0.265301	-0.0839352
		C6orf163	0.634187	-0.54765
		C6orf164	0.185271	-0.0569488
		C6orf165	1.17747	0
		C6orf201	0.425491	0
		C6orf203	-0.0685271	-0.24339
		C6orf211	0.082668	-1.01214
		C6orf223	1.35479	-9.35262
		C6orf226	0.319437	-1.22245
		C6orf47	-0.0030838	-0.0128712
		C6orf48	-0.0630346	-0.57445
		C6orf52	-0.172715	-0.0511646
		C6orf57	-0.127534	-0.411397
		C6orf62	-0.0387546	-0.503005
		C6orf89	-0.0116553	-0.0689811
		C6orf99	-0.96049	-0.284201
		C7orf13	0.288632	-0.37415
		C7orf25	-0.0943169	-0.424125
		C7orf26	-0.0085026	-0.0238049
		C7orf31	0.0768546	-0.179271
		C7orf43	-0.0833441	-0.627006
		C7orf49	0.0156849	-0.0844082
		C7orf50	-0.169094	-2.20892
		C7orf55	-0.186421	-0.0685564
		C7orf57	0.0104515	-0.00242344
		C7orf60	-0.099525	-0.588651
		C7orf61	0.633349	-0.395538
		C7orf63	0.83763	0
		C7orf73	0.00212202	-0.00683616
		C8G	-0.166332	-0.0743685
		C8orf31	0.21296	-0.176417
		C8orf33	0.175315	-3.96589
		C8orf37	-0.121732	-0.482347
		C8orf37-AS1	0.339256	-0.136528
		C8orf44	0.584567	-1.00803
		C8orf48	-0.728157	-0.45132
		C8orf58	0.178353	-1.15237
		C8orf59	-0.006975	-0.0231214
		C8orf76	0.125793	-0.136898
		C8orf82	0.234899	-2.13417
		C8orf88	-0.481829	-1.70253
		C9orf106	0.208491	-0.0512372
		C9orf114	-0.0091899	-0.0342548
		C9orf116	0.108123	-0.108229
		C9orf117	-0.234569	0
		C9orf129	0.025054	-0.0116807
		C9orf139	0.984893	-3.00358
		C9orf142	-0.126101	-1.23726
		C9orf156	-0.0399265	-0.123128
		C9orf16	-0.170766	-1.70494
		C9orf163	0.718332	-0.481341
		C9orf169	0.0911355	-0.0423714
		C9orf172	0.205996	-0.0878013
		C9orf24	0.319526	0
		C9orf3	0.213557	-0.410417
		C9orf37	0.145191	-0.65251
		C9orf40	-0.0826961	-0.58572
		C9orf41	0.0613264	-0.341295
		C9orf43	0.374651	-0.270096
		C9orf66	0.0421461	-0.0400703
		C9orf69	0.0569817	-0.374352
		C9orf72	0.0365837	-0.138522
		C9orf78	0.00972243	-0.0430042
		C9orf85	0.162226	-0.735936
		C9orf89	-0.168574	-2.93743
		C9orf9	0.440351	-0.570122
		C9orf91	-0.021959	-0.108948
		C9orf96	0.120085	-0.0528234
		CA11	0.47093	-2.24875
		CA12	-1.89243	0
		CA13	0.351436	-0.571286
		CA2	-0.952538	-24.9957
		CA5B	0.0491832	-0.089964
		CA5BP1	-0.0245845	-0.0517044
		CA8	0.125754	-0.0370776
		CAAP1	-0.0279119	-0.110719
		CAB39	-0.0185388	-0.141197
		CAB39L	-0.0548091	-0.148925
		CABIN1	0.184938	-2.42126
		CABLES1	-0.502297	-27.2358
		CABLES2	-0.128369	-0.793576
		CABP4	-0.38349	-0.230946
		CABYR	0.406491	-2.48168
		CACFD1	0.297541	-1.86769
		CACHD1	-1.12396	-7.02228
		CACNA1B	-1.585	0
		CACNA1C-AS1	0.731353	-0.281532
		CACNA1C-AS2	0.540943	-0.169321
		CACNA1D	-0.118538	-0.433424
		CACNA1F	-0.190114	-0.0527476
		CACNA1G	-1.18574	0
		CACNA2D2	-1.52522	0
		CACNA2D3	-0.405749	-1.14788
		CACNA2D4	-0.591528	-8.26761
		CACNB1	0.822743	-4.42136
		CACNB3	-0.350894	-1.42098
		CACNB4	0.436835	-4.50031
		CACTIN	0.130772	-1.10784
		CACTIN-AS1	1.04455	-1.22451
		CACUL1	0.0734166	-1.00956
		CACYBP	-0.0972065	-1.44416
		CAD	-0.112158	-1.36783
		CADM1	-0.77	-67.3487
		CADM4	0.108714	-0.0809394
		CADPS2	-1.47122	-21.2034
		CAGE1	-0.641967	0
		CAHM	-0.0610405	-0.03286
		CALCOCO1	0.130135	-0.958089
		CALCOCO2	0.0675286	-0.639055
		CALCR	0.729444	-0.240215
		CALCRL	-0.437066	-0.3592
		CALD1	-0.696044	-1.93781
		CALHM1	0.104452	-0.0486939
		CALHM2	0.125218	-1.7343
		CALHM3	0.140149	-0.0521337
		CALM1	-0.0234468	-0.228832
		CALM2	-0.100049	-1.67075
		CALM3	0.0723369	-1.05851
		CALML4	0.0544255	-0.20757
		CALR	-0.201129	-11.821
		CALU	-0.162476	-4.36552
		CAMK1	0.0265124	-0.178044
		CAMK1D	0.309542	-5.28316
		CAMK2A	0.978773	0
		CAMK2B	-1.61627	-51.0526
		CAMK2D	0.0658463	-0.818429
		CAMK2G	0.101982	-1.06578
		CAMK2N2	-0.864858	-0.429242
		CAMK4	-4.09406	-10.1469
		CAMKK1	-0.487185	-9.30715
		CAMKK2	0.115559	-1.21928
		CAMKMT	0.0615961	-0.0959598
		CAMLG	0.0662202	-0.35716
		CAMP	-1.4946	-1.15773
		CAMSAP1	0.147714	-1.59309
		CAMSAP2	0.0727544	-0.653187
		CAMSAP3	0.0066391	-0.00220551
		CAMTA1	0.134787	-1.11122
		CAMTA2	0.00597055	-0.0243788
		CAND1	-0.0822185	-1.56423
		CAND2	0.359975	-0.641451
		CANT1	-0.0696916	-0.729891
		CANX	-0.0371336	-0.433771
		CAP1	0.121744	-4.38616
		CAP2	-0.85362	-0.344036
		CAPG	0.0399154	-0.479715
		CAPN1	0.0785356	-1.08691
		CAPN10	-0.0156154	-0.0538499
		CAPN10-AS1	0.428901	-0.660622
		CAPN11	-0.725887	-0.651131
		CAPN12	0.70025	0
		CAPN15	0.151253	-1.26818
		CAPN2	-0.0960858	-0.376529
		CAPN3	-0.127864	-0.80652
		CAPN5	-0.320001	-0.9108
		CAPN7	0.0414709	-0.237106
		CAPNS1	0.0257971	-0.172128
		CAPNS2	1.21435	-0.646379
		CAPRIN1	0.045898	-0.577175
		CAPRIN2	-0.0966471	-0.516205
		CAPS	0.0949839	-0.120715
		CAPS2	0.00863273	-0.0060441
		CAPZA1	-0.0082532	-0.0517044
		CAPZA2	0.00067102	-0.00324616
		CAPZB	0.0355074	-0.429725
		CARD10	-0.0132401	-0.0031134
		CARD11	0.405225	-15.2757
		CARD16	-0.0357218	-0.103356
		CARD6	-0.0349543	-0.179271
		CARD8	-0.336592	-12.6861
		CARD9	0.0430168	-0.292718
		CARF	0.00937106	-0.0177303
		CARHSP1	-0.15254	-2.67779
		CARKD	0.0245918	-0.13367
		CARM1	0.10817	-1.40488
		CARNS1	0.72774	-0.357553
		CARS	0.261453	-5.8962
		CARS2	-0.129813	-1.8067
		CASC15	-2.85725	0
		CASC2	0.103086	-0.0405938
		CASC3	0.0107095	-0.0566895
		CASC4	-0.034057	-0.257716
		CASC5	-0.0133611	-0.0568338
		CASC9	-0.625693	-1.14479
		CASD1	-0.228006	-2.87851
		CASK	-0.0529285	-0.187541
		CASKIN1	-0.37942	-0.243941
		CASKIN2	-0.244789	-0.809486
		CASP1	-0.158233	-2.56486
		CASP10	0.0969766	-0.647974
		CASP2	-0.0896546	-0.738351
		CASP3	0.0517971	-0.455683
		CASP4	-0.0296373	-0.140473
		CASP5	-0.714557	-2.74369
		CASP6	0.0645408	-0.31172
		CASP7	-0.0327565	-0.161905
		CASP8	-0.0091738	-0.0447702
		CASP8AP2	-0.132909	-1.61566
		CASP9	-0.0047338	-0.014646
		CASS4	0.61963	-5.00524
		CAST	-0.0215306	-0.167377
		CASZ1	0.0640704	-0.0447702
		CAT	0.0376001	-0.28163
		CATIP	-0.19435	-0.10811
		CATIP-AS1	-0.308634	-0.404164
		CATSPER1	0.227332	-0.41623
		CATSPER2	0.192683	-0.348785
		CATSPER2P1	0.426549	-0.322876
		CATSPER3	0.00829612	-0.0060441
		CATSPERG	0.00842128	-0.0060441
		CBFA2T2	0.012814	-0.0528047
		CBFA2T3	0.430251	-1.21356
		CBFB	-0.0385143	-0.269343
		CBL	0.245612	-1.91363
		CBLB	-0.108564	-0.3056
		CBLL1	0.0147626	-0.069052
		CBLN1	1.13667	0
		CBLN3	0.276144	-0.24339
		CBR1	-0.0797246	-0.583298
		CBR3	-0.233601	-0.502945
		CBR3-AS1	0.0686964	-0.0515352
		CBR4	-0.0073993	-0.022316
		CBS	-0.536057	-6.28988
		CBWD1	0.150957	-1.23003
		CBWD2	0.0582621	-0.280228
		CBWD3	-0.0178521	-0.0128712
		CBWD5	0.166324	-0.868463
		CBWD6	-0.333181	-0.615319
		CBX1	0.0149273	-0.0930538
		CBX2	0.109606	-0.138331
		CBX3	0.101177	-1.99454
		CBX3P2	-0.423342	-0.164316
		CBX4	-0.151959	-1.25872
		CBX5	0.0288679	-0.054725
		CBX6	0.302278	-7.19246
		CBX7	-0.156756	-0.717071
		CBX8	0.176299	-0.412101
		CBY1	-0.0689331	-0.140253
		CC2D1A	-0.069191	-0.535772
		CC2D1B	-0.0322531	-0.210837
		CC2D2A	0.0770969	-0.251671
		CC2D2B	0.855475	-1.39179
		CCAR1	-0.0654553	-0.848783
		CCAR2	0.0864964	-1.73424
		CCBL1	0.20099	-0.85929
		CCBL2	-0.0272969	-0.107731
		CCDC101	0.0345922	-0.120322
		CCDC102A	0.668786	-9.03621
		CCDC102B	-0.200096	-0.204974
		CCDC103	0.602692	-0.984215
		CCDC104	-0.203627	-1.0195
		CCDC106	0.103604	-0.516205
		CCDC107	-0.284077	-3.47236
		CCDC109B	-0.0799131	-0.604013
		CCDC11	0.0350833	-0.0136478
		CCDC112	-0.027896	-0.107731
		CCDC113	-0.403787	-1.1367
		CCDC114	0.506735	-0.156986
		CCDC115	-0.016281	-0.0660191
		CCDC116	-0.241516	-0.0609576
		CCDC117	-0.059538	-0.453939
		CCDC12	0.105223	-0.943624
		CCDC120	0.181923	-0.521849
		CCDC121	-0.343663	-1.16906
		CCDC122	0.25653	-0.779583
		CCDC124	0.200898	-3.91446
		CCDC125	0.0987	-0.690712
		CCDC126	-0.205455	-1.02216
		CCDC127	-0.203499	-2.12791
		CCDC13	0.150014	-0.120829
		CCDC130	-0.135363	-1.04054
		CCDC132	-0.030114	-0.182508
		CCDC134	-0.087408	-0.30936
		CCDC135	-0.189916	-0.0879252
		CCDC136	0.650861	-3.67455
		CCDC137	0.120053	-1.19361
		CCDC138	-0.0136337	-0.0260196
		CCDC14	-0.116751	-1.16998
		CCDC142	0.0377217	-0.0921296
		CCDC144B	0.969126	0
		CCDC144CP	1.1451	-0.954699
		CCDC146	-0.216531	-0.412327
		CCDC147	-0.147274	-0.0358185
		CCDC147-AS1	0.932186	-0.536939
		CCDC148	-0.143391	0
		CCDC149	-0.83742	-6.00877
		CCDC15	-0.361207	-3.8754
		CCDC150	-0.14018	-0.489187
		CCDC151	-1.00087	0
		CCDC152	-0.861378	-0.659455
		CCDC153	-0.167982	-0.118511
		CCDC154	0.101676	-0.0981211
		CCDC155	-0.143323	0
		CCDC157	0.16269	-0.252391
		CCDC159	0.0850884	-0.201259
		CCDC162P	0.471484	0
		CCDC163P	0.0442566	-0.0538499
		CCDC167	0.017358	-0.0515858
		CCDC168	0.407949	-0.130987
		CCDC17	0.129263	-0.118891
		CCDC170	0.312292	-3.7986
		CCDC171	-0.422679	-1.29498
		CCDC174	0.0731125	-0.381643
		CCDC175	0.65707	0
		CCDC176	-0.064773	-0.0685844
		CCDC18	-0.025912	-0.130468
		CCDC183	0.117987	-0.0660697
		CCDC183-AS1	-0.120871	-0.16249
		CCDC19	-0.597465	-0.187925
		CCDC22	0.024803	-0.11728
		CCDC23	0.181393	-1.70057
		CCDC24	0.114335	-0.161345
		CCDC25	-0.0444392	-0.268572
		CCDC28A	0.0573877	-0.185466
		CCDC28B	0.0878535	-0.170591
		CCDC30	-0.187624	-0.0685844
		CCDC33	-1.12957	0
		CCDC34	-0.201906	-1.67382
		CCDC36	-0.264505	0
		CCDC40	-0.294271	-0.319253
		CCDC42	0.213486	0
		CCDC42B	-0.131546	-0.0518168
		CCDC43	0.0285184	-0.144052
		CCDC47	-0.0162667	-0.123765
		CCDC50	0.234649	-9.23732
		CCDC51	-0.0061917	-0.0189945
		CCDC53	0.0186137	-0.0553835
		CCDC57	-0.0497919	-0.188645
		CCDC58	0.00213857	-0.00342242
		CCDC59	0.15819	-0.980548
		CCDC6	0.201948	-4.64589
		CCDC61	-0.101583	-0.345195
		CCDC62	0.967559	-1.47474
		CCDC64	-0.694212	-0.806153
		CCDC66	0.151749	-1.0935
		CCDC68	1.43701	-2.99425
		CCDC69	0.117335	-2.02114
		CCDC7	0.0806071	-0.145342
		CCDC71	0.145193	-1.80693
		CCDC71L	0.00112272	-0.00219044
		CCDC73	0.249067	-0.0704015
		CCDC74A	-1.28464	-3.94188
		CCDC74B	-1.39216	-0.692548
		CCDC77	-0.0823065	-0.463988
		CCDC78	0.00236295	-0.00232439
		CCDC8	-0.14707	-0.691634
		CCDC80	0.300323	-0.0649511
		CCDC81	-0.211545	-0.0784736
		CCDC82	-0.205566	-4.27737
		CCDC84	0.0962525	-0.24845
		CCDC85B	-0.0536238	-0.280323
		CCDC85C	0.629579	-7.8041
		CCDC86	0.317714	-11.2321
		CCDC87	-0.581571	0
		CCDC88A	0.146537	-2.5809
[truncated: 13,565 more rows]

## Sheet: Fig 2 Supp 1 Panel F-G
	Fig. 2- fig supp 1F											Fig. 2- fig supp 1G
	Effects of P2Y12 receptor inhibitor PSB 0739 on Peak ADP (1 mM) Ca2+ response in 0mM Ca2+ buffer											Effects of P2Y12 receptor inhibitor MRS 2211 on Peak ADP (10 mM) Ca2+ response in 1mM Ca2+ buffer
	PSB 0739: 10mM (pre-incubation for 30 min before agonist addition); Solvent control: DMSO											MRS 2211: 10mM (pre-incubation for 30 min before agonist addition); Solvent control: DMSO
	Each data point is single-cell baseline subtracted Fluo-4/Fura-red ratio											Each data point is single-cell baseline subtracted Fluo-4/Fura-red ratio
	WT_peak-BL	WT_peak-BL_PSB	KO_peak-BL	KO_peak-BL_PSB								WT_peak-BL	WT_peak-BL_MRS	KO_peak-BL	KO_peak-BL_MRS
	column A	column B	column C	column D								column A	column B	column C	column D
	0.922079	0.056996	0.945337	0.952903			Column B	WT_peak-BL_PSB				1.90996	1.34507	1.8559	1.59202			Column B	WT_peak-BL_MRS
	0.037923	0.046144	1.34688	0.686434			vs.	vs.				1.90552	1.23359	1.8361	1.55417			vs.	vs.
	1.26651	0.046002	1.38258	0.044506			Column A	WT_peak-BL				1.79808	1.22506	1.78761	1.52856			Column A	WT_peak-BL
	0.038205	0.050039	1.60808	1.05606								1.64502	1.22382	1.74231	1.51874
	0.985532	0.03102	1.4016	0.826431			Mann Whitney test					1.63931	1.1658	1.72597	1.51703			Mann Whitney test
	0.055008	0.018229	1.72755	0.107276			P value	0.0061				1.63541	1.11839	1.69497	1.46914			P value	< 0.0001
	0.043845	1.00434	1.39627	1.16727			Exact or approximate P value?	Exact				1.50345	1.10177	1.69464	1.46899			Exact or approximate P value?	Exact
	0.064953	0.024696	1.15617	0.183291			P value summary	**				1.45944	1.09365	1.67782	1.46284			P value summary	****
	0.129876	0.020112	1.43057	0.040671			Significantly different? (P < 0.05)	Yes				1.39092	1.07702	1.65508	1.43729			Significantly different? (P < 0.05)	Yes
	0.05164	0.035246	1.20547	0.036816			One- or two-tailed P value?	Two-tailed				1.37387	1.02961	1.63838	1.42012			One- or two-tailed P value?	Two-tailed
	1.03241	0.025738	1.49944	0.048344			Sum of ranks in column A,B	6721 , 6645				1.37185	0.986776	1.61565	1.41261			Sum of ranks in column A,B	11672 , 7049
	0.03438	0.035472	1.19511	1.34548			Mann-Whitney U	2459				1.35111	0.945109	1.6002	1.40682			Mann-Whitney U	2954
	0.060644	0.050375	0.177772	1.28382								1.33542	0.933981	1.56846	1.39871
	0.594325	0.055441	0.970766	0.892393			Difference between medians					1.33346	0.916104	1.56649	1.36771			Difference between medians
	0.027674	0.790794	1.31612	0.074454			Median of column A	0.04866				1.33132	0.90376	1.54574	1.36002			Median of column A	0.8898
	0.032722	0.046942	1.67894	0.073264			Median of column B	0.03827				1.3274	0.887124	1.53833	1.3589			Median of column B	0.06455
	0.650816	0.050015	0.06148	1.20906			Difference: Actual	-0.01039				1.30622	0.870992	1.53735	1.31713			Difference: Actual	-0.8253
	0.996309	0.06075	1.4609	0.026043			Difference: Hodges-Lehmann	-0.009047				1.2867	0.857757	1.52903	1.30126			Difference: Hodges-Lehmann	-0.333
	0.880526	0.031009	1.3206	0.068545								1.27302	0.848047	1.52106	1.28402
	0.05415	0.031577	0.052223	0.998025								1.26919	0.831572	1.5202	1.27297
	1.00251	0.029582	1.60814	0.104512			Column D	KO_peak-BL_PSB				1.24649	0.812928	1.51224	1.25872			Column D	KO_peak-BL_MRS
	0.100757	0.025627	1.64101	1.44031			vs.	vs.				1.22864	0.788204	1.51146	1.2567			vs.	vs.
	0.040213	0.027329	1.38911	0.101084			Column C	KO_peak-BL				1.22775	0.705848	1.50917	1.25317			Column C	KO_peak-BL
	0.062731	0.031894	1.66312	0.885752								1.22579	0.68352	1.50867	1.2455
	0.050919	0.093447	0.053714	1.42178			Mann Whitney test					1.21295	0.680146	1.50324	1.24189			Mann Whitney test
	0.826895	0.023367	1.27369	0.057919			P value	< 0.0001				1.2127	0.67337	1.48242	1.21268			P value	< 0.0001
	0.92381	0.033872	1.44392	0.05416			Exact or approximate P value?	Approximate				1.21097	0.644477	1.47818	1.20628			Exact or approximate P value?	Exact
	0.798992	1.16947	1.16118	0.039254			P value summary	****				1.20482	0.637761	1.46939	1.19456			P value summary	****
	0.084687	0.045933	1.30032	0.026311			Significantly different? (P < 0.05)	Yes				1.18503	0.629816	1.46844	1.18514			Significantly different? (P < 0.05)	Yes
	0.249169	0.076937	1.37021	0.027627			One- or two-tailed P value?	Two-tailed				1.1805	0.623403	1.46576	1.17626			One- or two-tailed P value?	Two-tailed
	0.067855	0.041067	1.27717	0.118893			Sum of ranks in column C,D	17727 , 10476				1.12748	0.589239	1.46477	1.17148			Sum of ranks in column C,D	10862 , 9238
	0.051307	0.030431	1.52439	0.068532			Mann-Whitney U	2220				1.11437	0.577922	1.46186	1.15655			Mann-Whitney U	2335
	0.519382	0.123242	1.20796	0.069158								1.09624	0.548155	1.44826	1.14909
	0.034433	0.033584	1.38245	0.064715			Difference between medians					1.09166	0.516668	1.41554	1.14906			Difference between medians
	0.060924	0.030865	1.41535	0.676307			Median of column C	1.318				1.05665	0.475196	1.40944	1.14696			Median of column C	1.388
	0.027864	0.822011	1.31832	0.074152			Median of column D	0.6814				1.04361	0.473525	1.40879	1.13355			Median of column D	0.9714
	0.03091	0.053883	1.38436	0.835561			Difference: Actual	-0.637				1.01419	0.409137	1.40751	1.12957			Difference: Actual	-0.4165
	0.048509	0.038712	1.48051	0.058997			Difference: Hodges-Lehmann	-0.5728				1.01154	0.393144	1.40125	1.12851			Difference: Hodges-Lehmann	-0.3883
	0.048179	0.033212	0.775765	0.062613								1.00757	0.379084	1.40034	1.12824
	0.036973	0.056446	1.00695	0.058754								0.992632	0.353019	1.39882	1.12579
	0.020448	0.04057	1.57654	1.0493								0.978709	0.340795	1.39735	1.11596
	0.02996	0.021153	1.18137	1.48815								0.974067	0.326355	1.38796	1.0967
	0.031115	0.045352	1.28232	0.034287								0.967954	0.19561	1.36136	1.0929
	0.077415	0.021038	1.2955	0.240931								0.966932	0.126421	1.33894	1.08817
	0.043316	0.031465	1.30307	1.20361								0.956834	0.079781	1.33614	1.08641
	0.058403	0.04677	1.13968	1.29715								0.951903	0.049321	1.32857	1.08438
	0.03559	0.051364	1.57197	0.038043								0.94051	0.047509	1.32695	1.06959
	0.041408	1.18359	1.31972	0.033617								0.937348	0.042147	1.3062	1.05947
	0.026212	0.030603	1.36722	1.21292								0.934847	0.040226	1.30356	1.05242
	0.29721	0.043205	1.65581	0.063746								0.914738	0.038609	1.27394	1.05119
	0.023188	0.051797	1.18435	0.04981								0.88988	0.036899	1.26241	1.04154
	0.056411	0.029954	0.275093	1.1632								0.889832	0.036205	1.24766	1.03436
	0.056585	0.052405	1.65502	0.045432								0.859899	0.035203	1.24394	1.03374
	0.044327	0.018519	1.04448	0.80444								0.815556	0.034545	1.23068	1.03358
	0.028213	0.054702	1.40244	1.42865								0.807732	0.034519	1.22026	1.01494
	0.028096	0.059899	1.32562	1.31205								0.802768	0.03359	1.19058	0.992932
	0.044808	0.017578	0.108217	1.12568								0.79542	0.033459	1.18459	0.991586
	0.034782	0.02093	1.04825	0.139311								0.785654	0.032289	1.16622	0.98874
	0.032902	0.032858	1.6616	1.02964								0.77146	0.031974	1.15309	0.971433
	0.027895	0.025343	1.34621	1.53383								0.762733	0.03059	1.12774	0.969256
	0.024796	0.049021	0.183041	0.056395								0.738553	0.028741	1.09783	0.956312
	0.03387	0.025995	1.42145	1.15729								0.71845	0.028459	1.06813	0.945592
	0.031331	0.032369	1.43158	0.439864								0.690468	0.028297	1.02008	0.923409
	1.36062	0.035545	1.49091	0.045964								0.651641	0.026409	0.952986	0.912033
	0.022001	0.050581	1.28002	1.34879								0.610639	0.02582	0.882969	0.893785
	0.431762	0.025796	1.3721	1.20341								0.601009	0.025595	0.851393	0.892584
	0.034553	0.026443	1.2219	0.084762								0.595186	0.024751	0.82083	0.890206
	0.029162	0.047072	1.31293	1.18294								0.583401	0.024725	0.816697	0.869843
	0.422877	0.018332	1.16088	0.036348								0.237731	0.023892	0.804334	0.864543
	0.048807	0.05089	1.27273	1.29327								0.191639	0.02366	0.765646	0.863273
	0.030021	0.031483	1.54571	0.123087								0.10988	0.021168	0.729272	0.830491
	0.022069	0.045628	1.32659	0.868098								0.08946	0.020939	0.677273	0.828225
		0.757723	1.15353	1.05478								0.080686	0.020669	0.580212	0.800762
		0.037051	1.05372	0.911001								0.076545	0.020305	0.547377	0.798694
		0.039336	1.35077	1.0469								0.058498	0.020253	0.535079	0.798592
		0.846721	1.26084	0.738303								0.050644	0.020249	0.499023	0.737781
		0.022582	1.0971	0.868816								0.044582	0.019868	0.47504	0.727353
		0.022276	1.33484	0.829115								0.037517	0.019815	0.441037	0.724394
		0.078748	1.19533	0.046515								0.036774	0.018894	0.272021	0.709794
		0.540233	1.15179	1.27846								0.036669	0.018849	0.238646	0.697973
		0.029191	1.38545	0.975547								0.031061	0.018622	0.235836	0.666454
		0.897843	0.158658	0.058341								0.029661	0.018162	0.071726	0.612433
		0.049916	1.28395	1.29435								0.029484	0.017859	0.069643	0.551302
		0.023236	1.17315	1.2161								0.026285	0.016633		0.546685
		0.033588	1.54862	0.932972								0.025656	0.015924		0.521125
		0.023381	1.06455	0.021556								0.025216	0.015443		0.421729
		0.042665	0.954533	1.08733								0.023794	0.015006		0.383968
		0.032131	1.48127	0.936015								0.0228	0.011772		0.107515
		0.032504	1.03881	1.01263								0.022282	0.008628		0.073155
		0.038268	1.62419	1.3674								0.021178	0.008476		0.047698
		0.051458	1.37885	1.01187								0.020493			0.04424
			1.26029	1.02674								0.0187			0.044142
			1.52848	1.01014								0.017984			0.043249
			1.32212	1.08503								0.017103			0.041823
			1.37401	0.045226								0.016881			0.041195
			1.30033	1.26857								0.015835			0.040752
			1.40035	0.04603								0.015281			0.039342
			1.16386	0.40686								0.015111			0.035704
			0.80573	0.081986								0.01229			0.034889
			1.09268	0.634176								0.009909			0.031613
			1.34418	1.11231								0.009101			0.030899
			1.48997	0.111648								0.006237			0.026365
			1.37459	0.020873								0.005003			0.025465
			1.3339	0.876906											0.024449
			1.22474	0.645887											0.024281
			1.1028	1.05607											0.02413
			1.00257	0.053735											0.023632
			1.38184	0.910564											0.02253
			1.04038	0.028628											0.021004
				1.4599											0.01695
				0.024994											0.016941
				0.196578											0.016696
				0.393368											0.014129
				0.051781											0.013664
				0.03789											0.012132
				0.997512											0.007415
				0.0272											0.006723
				0.060376
				0.956063
				1.43115
				0.875304
				1.04963
				0.047966
				1.45869
				1.1932
				0.062055
				0.054077
				0.295391
