# Supplementary material for: TREM2 regulates purinergic receptor-mediated calcium signaling and motility in human iPSC-derived microglia
Source: eLife. 2022 Feb 22;11:e73021. doi: 10.7554/eLife.73021 (PMC8906810; doi:10.7554/eLife.73021)
Supplement: Figure 3—source data 1. — In this dataset, the results of blocking SOCE on ADP stimulation and investigation of store content as well as the correlation between original calcium store release and SOCE are included. [file elife-73021-fig3-data1.xlsx]

## Sheet: Fig. 3A
				Fig. 3A (left panel)								Fig. 3A (right panel)
			AverageTrace: SOCE in WT cells (control and Synta66 pre-treated)									Each data point represents a single cell
			X-axis: Time (s), Y-axis: Fluo-4/Fura-Red Ratio; SEM: std.error of mean
												WT microglia
				WT microglia								SOCE Rate
				Control			Synta66					Control	Synta66
			Time (s)	Mean	SEM		Mean	SEM				column A	column B
		1Ca	0	0.109838	0.001948		0.104658	0.002653				0.104329	0.011562			Mann Whitney test
			2	0.111223	0.002109		0.104336	0.002546				0.118925	0.006792			P value	< 0.0001
			4	0.110001	0.002042		0.104756	0.002625				0.025729	0.015016			Exact or approximate P value?	Approximate
			6	0.109873	0.002283		0.104339	0.002639				0.144863	0.00597			P value summary	****
			8	0.10859	0.002186		0.10362	0.002703				0.108736	0.009719			Significantly different? (P < 0.05)	Yes
			10	0.108654	0.002071		0.104237	0.00278				0.168542	0.009785			One- or two-tailed P value?	Two-tailed
			12	0.108505	0.001954		0.104134	0.002759				0.132141	0.005958			Sum of ranks in column A,B	24660 , 6216
			14	0.109358	0.001921		0.104284	0.002816				0.136625	0.011351			Mann-Whitney U	0
			16	0.110351	0.002083		0.103684	0.002755				0.138989	0.009182
			18	0.111489	0.002162		0.104759	0.00272				0.132509	0.00786			Difference between medians
			20	0.113183	0.002224		0.105883	0.002697				0.094164	0.008778			Median of column A	0.1356
			22	0.112478	0.002119		0.10621	0.002642				0.145924	0.006573			Median of column B	0.01029
			24	0.112515	0.002151		0.105158	0.00256				0.11729	0.011026			Difference: Actual	-0.1253
			26	0.110105	0.001988		0.103812	0.002642				0.159646	0.012636			Difference: Hodges-Lehmann	-0.1259
			28	0.110701	0.00201		0.10358	0.002665				0.115506	0.016126
			30	0.110763	0.00172		0.103383	0.002557				0.129648	0.008785
			32	0.112168	0.001777		0.103995	0.002551				0.082225	0.007292
			34	0.110602	0.001872		0.104353	0.002634				0.063239	0.008363
			36	0.109994	0.002035		0.10442	0.002764				0.156818	0.007874
			38	0.108709	0.002013		0.105015	0.002776				0.156288	0.013759
			40	0.109393	0.002113		0.104559	0.002623				0.110431	0.013376
			42	0.109041	0.002309		0.104815	0.002684				0.170619	0.01229
			44	0.10996	0.002148		0.105609	0.003217				0.1482	0.014249
			46	0.110047	0.001916		0.106774	0.003795				0.161775	0.013402
			48	0.111109	0.001915		0.107681	0.00414				0.148049	0.011601
			50	0.110421	0.001927		0.108033	0.003491				0.134199	0.014243
			52	0.111789	0.00198		0.107315	0.003153				0.086028	0.006879
			54	0.111557	0.002098		0.106494	0.00282				0.078507	0.00887
			56	0.113117	0.002402		0.104739	0.002614				0.151681	0.010108
			58	0.11297	0.002304		0.104791	0.002437				0.129603	0.012939
		0CaTG	60	0.11325	0.002259		0.105447	0.002528				0.159783	0.019134
			62	0.112183	0.002196		0.105945	0.002512				0.135097	0.009519
			64	0.112584	0.002451		0.105454	0.002637				0.173773	0.015233
			66	0.115002	0.00345		0.1044	0.0027				0.166039	0.017339
			68	0.12337	0.008558		0.104461	0.002671				0.160937	0.016184
			70	0.127367	0.011935		0.105425	0.002728				0.160165	0.01264
			72	0.128121	0.012805		0.106473	0.00271				0.153459	0.017461
			74	0.122204	0.00812		0.10522	0.00272				0.108599	0.014562
			76	0.117878	0.005696		0.105101	0.00269				0.184684	0.007683
			78	0.115796	0.003811		0.104355	0.002553				0.138848	0.004214
			80	0.113476	0.002635		0.105055	0.00258				0.127899	0.009552
			82	0.113125	0.002142		0.103903	0.002625				0.152181	0.002421
			84	0.112365	0.002007		0.103133	0.002588				0.090951	0.009535
			86	0.113696	0.002183		0.103572	0.002588				0.112807	0.013558
			88	0.116815	0.002182		0.105469	0.002407				0.125462	0.006712
			90	0.123778	0.002502		0.109424	0.002373				0.190715	0.010532
			92	0.134262	0.002869		0.114181	0.002447				0.149845	0.011048
			94	0.149496	0.003711		0.121086	0.002716				0.131803	0.006411
			96	0.169629	0.005407		0.130329	0.003184				0.11628	0.010964
			98	0.195852	0.00832		0.142743	0.003764				0.195375	0.007156
			100	0.228531	0.011915		0.157491	0.004537				0.156803	0.007867
			102	0.266	0.014929		0.175583	0.005419				0.159536	0.003937
			104	0.307255	0.017702		0.19643	0.006395				0.166455	0.00491
			106	0.350814	0.019929		0.221605	0.007552				0.191477	0.013404
			108	0.396343	0.02122		0.24771	0.008892				0.165864	0.016192
			110	0.441116	0.021359		0.276407	0.010599				0.143001	0.016598
			112	0.482703	0.021503		0.30417	0.012171				0.126733	0.010324
			114	0.518493	0.021149		0.331053	0.013346				0.123344	0.011524
			116	0.549403	0.021245		0.359439	0.013906				0.116278	0.00922
			118	0.571118	0.020916		0.380647	0.014179				0.079842	0.004285
			120	0.586128	0.020384		0.401005	0.014301				0.105925	0.01503
			122	0.591586	0.019311		0.414736	0.014502				0.134397	0.014887
			124	0.594418	0.018715		0.426992	0.014737				0.112806	0.009918
			126	0.591851	0.018439		0.433722	0.014312				0.108061	0.006592
			128	0.58845	0.018359		0.437368	0.014041				0.103925	0.002229
			130	0.584059	0.018126		0.440143	0.013702				0.147535	0.007882
			132	0.575083	0.017145		0.446555	0.014107				0.117834	0.003987
			134	0.568819	0.016312		0.449943	0.013749				0.144455	0.008719
			136	0.559651	0.014555		0.454138	0.013128				0.086509	0.010285
			138	0.550562	0.013943		0.452723	0.012693				0.144929	0.007765
			140	0.541164	0.013022		0.450433	0.012752				0.166636	0.013436
			142	0.532651	0.013349		0.446522	0.012701				0.116236	0.00748
			144	0.530406	0.012739		0.442444	0.012779				0.176673	0.009419
			146	0.52595	0.012282		0.439924	0.012461				0.176441	0.016111
			148	0.521927	0.011544		0.437682	0.012633				0.150327	0.011413
			150	0.515422	0.011625		0.434482	0.012542				0.145546	0.008462
			152	0.504574	0.011306		0.431481	0.012519				0.208036	0.011882
			154	0.496021	0.011035		0.429	0.012624				0.143136	0.012103
			156	0.48982	0.010776		0.427165	0.01256				0.130396	0.014055
			158	0.485115	0.010518		0.423031	0.011781				0.086245	0.004926
			160	0.481058	0.010124		0.418466	0.011306				0.185724	0.012598
			162	0.475056	0.009622		0.414671	0.011308				0.125987	0.010935
			164	0.468713	0.009703		0.411332	0.011805				0.124433	0.007957
			166	0.464823	0.009736		0.407007	0.011537				0.132729	0.007427
			168	0.459353	0.009887		0.404901	0.011087				0.191023	0.008841
			170	0.455676	0.009814		0.402058	0.010769				0.125474	0.009357
			172	0.447751	0.009792		0.399023	0.010296				0.163156	0.011332
			174	0.445457	0.009591		0.394697	0.010242				0.183291	0.010756
			176	0.440028	0.009563		0.390178	0.010286				0.172837	0.011613
			178	0.437981	0.010372		0.387769	0.010488				0.109498	0.009941
			180	0.430855	0.010708		0.386064	0.01072				0.134848	0.012301
			182	0.425138	0.010409		0.383539	0.010661				0.129742	0.01222
			184	0.416362	0.009899		0.382338	0.011028				0.124044	0.014697
			186	0.410514	0.009629		0.38025	0.010768				0.10188	0.003347
			188	0.408399	0.01018		0.380097	0.011211				0.152432	0.004569
			190	0.403706	0.010075		0.376699	0.01109				0.156568	0.007136
			192	0.396457	0.010034		0.37147	0.010828				0.105593	0.005542
			194	0.389111	0.009473		0.365675	0.010098				0.107089	0.009374
			196	0.383492	0.009348		0.361756	0.00976				0.112817	0.006135
			198	0.3819	0.009328		0.359618	0.009622				0.148773	0.014664
			200	0.37754	0.009451		0.360336	0.009945				0.148223	0.001897
			202	0.375141	0.009097		0.359166	0.010177				0.114945	0.00723
			204	0.371525	0.008966		0.357418	0.010424				0.15188	0.020802
			206	0.366781	0.009266		0.353609	0.010323				0.172454	0.017846
			208	0.359591	0.009561		0.35158	0.010439				0.086105	0.010154
			210	0.354892	0.009788		0.349868	0.010464				0.144139	0.012935
			212	0.35197	0.009581		0.346701	0.0104				0.149668	0.012172
			214	0.351444	0.009677		0.3428	0.01018				0.135653	0.015366
			216	0.347759	0.009616		0.339841	0.010329				0.138074	0.013422
			218	0.342669	0.009646		0.337116	0.009829				0.162192	0.013102
			220	0.337077	0.009265		0.334296	0.009713				0.121579	0.015648
			222	0.331346	0.009052		0.330289	0.009303				0.108802
			224	0.327692	0.009345		0.327676	0.009514				0.153921
			226	0.324451	0.009439		0.32482	0.009619				0.134497
			228	0.320654	0.009564		0.322484	0.0099				0.116193
			230	0.3151	0.009287		0.320085	0.009769				0.109889
			232	0.310435	0.009667		0.316689	0.00953				0.106597
			234	0.306411	0.009791		0.313257	0.009483				0.141539
			236	0.303541	0.009674		0.30897	0.009377				0.150497
			238	0.300083	0.009318		0.305956	0.009043				0.120403
			240	0.296362	0.008974		0.303043	0.008894				0.100363
			242	0.293186	0.008902		0.301389	0.008952				0.080784
			244	0.289174	0.008852		0.300541	0.00923				0.137941
			246	0.28583	0.008882		0.295773	0.009207				0.112005
			248	0.28221	0.008941		0.292587	0.009334				0.179137
			250	0.278811	0.009055		0.289586	0.009262				0.176316
			252	0.275108	0.00876		0.287656	0.008927				0.13342
			254	0.272064	0.008636		0.284702	0.008797				0.14747
			256	0.267916	0.008607		0.280992	0.00877				0.09946
			258	0.263658	0.00862		0.278548	0.009046				0.127938
			260	0.259033	0.008476		0.276775	0.008885				0.182106
			262	0.256991	0.008312		0.274691	0.008562				0.161693
			264	0.254908	0.008223		0.272789	0.008335				0.105907
			266	0.251416	0.007652		0.269656	0.008376				0.054495
			268	0.248716	0.007491		0.26566	0.008463				0.145682
			270	0.243175	0.007403		0.264108	0.008664				0.135558
			272	0.239696	0.007558		0.261199	0.008196				0.142279
			274	0.234687	0.007476		0.258728	0.008121
			276	0.234343	0.007299		0.255563	0.007732
			278	0.23415	0.007172		0.253213	0.007864
			280	0.231907	0.007185		0.251817	0.008009
			282	0.22719	0.00706		0.247659	0.007903
			284	0.221327	0.006877		0.245588	0.008116
			286	0.219882	0.006635		0.241171	0.007818
			288	0.220465	0.006471		0.239704	0.008116
			290	0.219291	0.006102		0.236659	0.007755
			292	0.215529	0.006031		0.237469	0.008022
			294	0.210478	0.006002		0.236713	0.00815
			296	0.209065	0.006428		0.234656	0.008229
			298	0.207609	0.006344		0.230605	0.008043
			300	0.208143	0.006318		0.228215	0.007625
			302	0.203474	0.005952		0.224941	0.007087
			304	0.200056	0.005796		0.223793	0.00722
			306	0.193869	0.005644		0.221178	0.007127
			308	0.191617	0.005504		0.218896	0.007213
			310	0.189761	0.005518		0.216994	0.007087
			312	0.190323	0.005331		0.214157	0.007172
			314	0.189345	0.005515		0.213405	0.007221
			316	0.187904	0.005172		0.210855	0.007036
			318	0.186264	0.005157		0.209382	0.006714
			320	0.185753	0.004697		0.206172	0.00668
			322	0.185291	0.005033		0.203588	0.006772
			324	0.181809	0.004961		0.201954	0.00683
			326	0.17856	0.005061		0.20135	0.006824
			328	0.174567	0.004702		0.201172	0.006587
			330	0.173171	0.004444		0.200731	0.006471
			332	0.170504	0.00458		0.199299	0.006475
			334	0.169198	0.004558		0.197453	0.006691
			336	0.167289	0.004841		0.193889	0.006631
			338	0.166773	0.004883		0.191705	0.006562
			340	0.16549	0.005121		0.188118	0.006275
			342	0.164766	0.005101		0.185607	0.0063
			344	0.165	0.004932		0.181996	0.006237
			346	0.163297	0.004663		0.180067	0.006083
			348	0.162358	0.00459		0.178577	0.00604
			350	0.159325	0.004437		0.178392	0.005987
			352	0.157969	0.004428		0.176854	0.00612
			354	0.156877	0.004409		0.176132	0.006118
			356	0.155625	0.004267		0.174842	0.006063
			358	0.154662	0.004279		0.173056	0.005882
			360	0.152849	0.004166		0.171529	0.005795
			362	0.152647	0.004248		0.170152	0.005623
			364	0.151785	0.004349		0.169401	0.005578
			366	0.150625	0.004345		0.168749	0.005531
			368	0.149805	0.004264		0.168575	0.005559
			370	0.14911	0.004083		0.168935	0.005623
			372	0.14738	0.00405		0.168332	0.005475
			374	0.145661	0.004096		0.166111	0.005453
			376	0.14343	0.004044		0.164414	0.005461
			378	0.142787	0.003744		0.162355	0.005376
			380	0.141218	0.003641		0.162302	0.005431
			382	0.142903	0.003728		0.161102	0.005283
			384	0.142358	0.003992		0.159804	0.005212
			386	0.140398	0.003832		0.158836	0.005127
			388	0.136806	0.003894		0.157781	0.005066
			390	0.135498	0.00368		0.156717	0.005117
			392	0.135351	0.00384		0.153885	0.004989
			394	0.134186	0.00365		0.153026	0.005165
			396	0.13294	0.003567		0.151704	0.00505
			398	0.131704	0.003523		0.151611	0.005114
			400	0.129807	0.003529		0.15009	0.004963
			402	0.129427	0.003419		0.149808	0.005075
			404	0.129062	0.00341		0.148671	0.004957
			406	0.129908	0.003359		0.1483	0.004976
			408	0.129087	0.003304		0.148291	0.004857
			410	0.128626	0.003216		0.147751	0.004894
			412	0.126641	0.003134		0.146995	0.004778
			414	0.125487	0.003274		0.145506	0.004877
			416	0.124531	0.00318		0.143331	0.004772
			418	0.125066	0.003109		0.141464	0.004648
			420	0.123422	0.002899		0.13947	0.004497
			422	0.122651	0.002717		0.139625	0.00452
			424	0.121818	0.002886		0.138896	0.00465
			426	0.122015	0.002912		0.13861	0.004611
			428	0.122496	0.003127		0.138215	0.004631
		1Ca	430	0.123002	0.00308		0.136744	0.004518
			432	0.12378	0.002975		0.136543	0.004581
			434	0.120992	0.002892		0.135702	0.004505
			436	0.119068	0.002714		0.135399	0.004461
			438	0.117007	0.002696		0.131933	0.004203
			440	0.11689	0.002519		0.129201	0.004133
			442	0.116565	0.002524		0.130734	0.004083
			444	0.141465	0.00308		0.138745	0.004223
			446	0.303571	0.008808		0.153328	0.004612
			448	0.591348	0.01964		0.170931	0.005268
			450	0.942116	0.031635		0.192242	0.006184
			452	1.16859	0.037548		0.213911	0.006968
			454	1.30725	0.040768		0.233933	0.007459
			456	1.41653	0.043124		0.253447	0.008136
			458	1.49564	0.045747		0.271512	0.008963
			460	1.56772	0.0475		0.290018	0.009918
			462	1.6233	0.050244		0.303849	0.010455
			464	1.67953	0.052991		0.317143	0.010917
			466	1.71934	0.055552		0.329079	0.011696
			468	1.7537	0.055912		0.341908	0.012325
			470	1.77697	0.055084		0.352318	0.012445
			472	1.80079	0.055416		0.360885	0.012206
			474	1.81963	0.057806		0.367158	0.012249
			476	1.83802	0.059104		0.372265	0.012552
			478	1.842	0.059228		0.376502	0.012748
			480	1.83908	0.05862		0.381937	0.012937
			482	1.83941	0.058899		0.384729	0.012967
			484	1.84329	0.058195		0.390095	0.013357
			486	1.84577	0.057403		0.394857	0.013595
			488	1.85024	0.058441		0.399721	0.013477
			490	1.84088	0.060767		0.401059	0.013353
			492	1.83723	0.062537		0.402299	0.013379
			494	1.83899	0.0634		0.402041	0.013516
			496	1.8432	0.063496		0.404012	0.013448
			498	1.84959	0.06424		0.406786	0.013642
			500	1.83939	0.06492		0.411351	0.014044
			502	1.83979	0.065922		0.41339	0.014372
			504	1.84188	0.066164		0.414779	0.014378
			506	1.84316	0.065709		0.41417	0.01442
			508	1.84467	0.065519		0.414096	0.014562
			510	1.82892	0.065001		0.41207	0.014448
			512	1.8303	0.065195		0.413059	0.014585
			514	1.82536	0.065504		0.410862	0.01428
			516	1.83174	0.065077		0.411002	0.014039
			518	1.82898	0.065309		0.411001	0.014022
			520	1.82868	0.066007		0.414077	0.014311
			522	1.83217	0.06746		0.414314	0.014451
			524	1.8274	0.066675		0.415817	0.014331
			526	1.82449	0.066101		0.417418	0.014579
			528	1.808	0.065287		0.419058	0.014399
			530	1.80472	0.065659		0.418166	0.014096
			532	1.80406	0.065707		0.417262	0.014194
			534	1.80878	0.066885		0.418438	0.014818
			536	1.81021	0.067162		0.418448	0.015533
			538	1.81275	0.068438		0.415876	0.015439
			540	1.81336	0.068134		0.41415	0.014776
			542	1.80719	0.068482		0.414387	0.014423
			544	1.80743	0.068338		0.416787	0.014421
			546	1.80971	0.069244		0.41566	0.014718
			548	1.82402	0.07017		0.412961	0.014355
			550	1.81676	0.069913		0.414321	0.013903
			552	1.81955	0.069657		0.415114	0.013577
			554	1.80811	0.069636		0.41571	0.014129
			556	1.81054	0.069689		0.413382	0.014278
			558	1.80429	0.069493		0.411939	0.014358
			560	1.80328	0.068956		0.411139	0.014337
			562	1.79843	0.070272		0.410596	0.014244
			564	1.7959	0.070812		0.410835	0.013931
			566	1.80149	0.071998		0.412055	0.013743
			568	1.8041	0.073237		0.413038	0.014357
			570	1.80377	0.07371		0.413234	0.014804
			572	1.79949	0.073474		0.414011	0.015086
			574	1.80448	0.071945		0.412372	0.014619
			576	1.81385	0.071782		0.411332	0.014688
			578	1.81372	0.072308		0.41082	0.014672
			580	1.80432	0.072994		0.408895	0.01487
			582	1.7868	0.073167		0.406623	0.014385
			584	1.78475	0.072449		0.404146	0.014222
			586	1.78082	0.07334		0.40375	0.014221
			588	1.79258	0.073992		0.402314	0.014031
			590	1.78483	0.074549		0.39776	0.013616
			592	1.77856	0.073167		0.39649	0.013278
			594	1.7558	0.073866		0.394777	0.013226
			596	1.74363	0.074402		0.391045	0.013421
			598	1.72836	0.076001		0.374012	0.012506
		0Ca	600	1.72657	0.076634		0.354543	0.012074
			602	1.68525	0.077862		0.327276	0.011005
			604	1.60238	0.078788		0.302489	0.010277
			606	1.4728	0.079457		0.276474	0.008969
			608	1.33929	0.079503		0.255671	0.008034
			610	1.21754	0.079336		0.239271	0.007485
			612	1.10772	0.079322		0.22218	0.007085
			614	1.01098	0.078145		0.208311	0.006827
			616	0.933843	0.076583		0.194437	0.006131
			618	0.875155	0.075201		0.183113	0.005781
			620	0.827876	0.074326		0.170705	0.005267
			622	0.789321	0.073354		0.162318	0.004992
			624	0.753539	0.072097		0.153662	0.004588
			626	0.720172	0.070065		0.148386	0.004514
			628	0.693618	0.068226		0.143002	0.004229
			630	0.674074	0.066712		0.139771	0.004099
			632	0.660099	0.066027		0.134404	0.003784
			634	0.643361	0.065321		0.130301	0.003778
			636	0.625574	0.0644		0.125737	0.003688
			638	0.61101	0.063233		0.122621	0.003634
			640	0.600775	0.062484		0.118553	0.003399
			642	0.594527	0.061618		0.114824	0.003335
			644	0.585143	0.060956		0.111831	0.003254
			646	0.575705	0.059732		0.10879	0.003278
			648	0.566785	0.059175		0.106913	0.003031
			650	0.558747	0.058496		0.104539	0.002949
			652	0.551253	0.057911		0.102594	0.002831
			654	0.54103	0.05707		0.100884	0.00274
			656	0.534326	0.056249		0.100449	0.002603
			658	0.525962	0.055496		0.100496	0.002546
			660	0.521014	0.05462		0.099755	0.002693
			662	0.512836	0.054077		0.098586	0.002639
			664	0.502424	0.052817		0.096713	0.00264
			666	0.496798	0.052624		0.095175	0.002542
			668	0.490531	0.0517		0.093109	0.002572
			670	0.486669	0.051444		0.092374	0.002568
			672	0.478314	0.050485		0.090995	0.002405
			674	0.472917	0.049993		0.090343	0.002419
			676	0.468665	0.049638		0.089923	0.00245
			678	0.467759	0.049687		0.090225	0.002467
			680	0.465079	0.049004		0.091515	0.002594
			682	0.46385	0.048828		0.090359	0.002418
			684	0.458672	0.048107		0.090138	0.002374
			686	0.4537	0.047816		0.088137	0.002225
			688	0.448934	0.047185		0.088691	0.002314
			690	0.448347	0.04737		0.088451	0.002404
			692	0.448332	0.047396		0.088987	0.00239
			694	0.445953	0.046978		0.088782	0.002505
			696	0.439328	0.046118		0.087671	0.002404
			698	0.436374	0.045571		0.086641	0.002382
			700	0.435136	0.045687		0.086071	0.002362
			702	0.434157	0.045664		0.08493	0.00223
			704
			706
			708
			710
			712
			714
			716
			718
			720
			722
			724
			726
			728
			730
			732
			734
			736
			738
			740
			742
			744
			746
			748
			750
			752
			754
			756
			758
			760
			762
			764
			766
			768
			770
			772
			774
			776
			778
			780
			782
			784
			786
			788
			790
			792
			794
			796
			798
			800
			802
			804
			806
			808
			810
			812
			814
			816
			818
			820
			822
			824
			826
			828
			830
			832
			834
			836
			838
			840
			842
			844
			846
			848
			850
			852
			854
			856
			858
			860
			862
			864
			866
			868
			870
			872
			874
			876
			878
			880
			882
			884
			886

## Sheet: Fig. 3B
				Fig. 3B (left panel)									Fig. 3B (right panel)
			AverageTrace: SOCE induced by ADP in WT cells (control and Synta66 pre-treated)
			X-axis: Time (s), Y-axis: Fluo-4/Fura-Red Ratio; SEM: std.error of mean
													WT microglia
				WT microglia									SOCE Rate
				Control			Synta66						Control	Synta66
			Time (s)	Mean	SEM		Mean	SEM					column A	column B
			0	0.149407	0.00419		0.159366	0.006028					0.019724	0			Mann Whitney test
			2	0.150836	0.004237		0.158295	0.006245					0.057073	0			P value	< 0.0001
			4	0.150529	0.004345		0.159033	0.005923					0.053972	0.00092361			Exact or approximate P value?	Approximate
			6	0.151531	0.00425		0.158302	0.005493					0.04249	0			P value summary	****
			8	0.152217	0.004367		0.15907	0.00504					0.025596	0.00080908			Significantly different? (P < 0.05)	Yes
			10	0.15253	0.004278		0.160063	0.004976					0.000924	0			One- or two-tailed P value?	Two-tailed
			12	0.152581	0.004462		0.159694	0.005222					0	0.00037159			Sum of ranks in column A,B	32214 , 13843
			14	0.151388	0.004418		0.159377	0.004958					0.000181	0.00103924			Mann-Whitney U	2817
			16	0.150731	0.004411		0.157397	0.004763					0.027153	0.00128336
			18	0.150592	0.00416		0.157768	0.004834					0.001473	0			Difference between medians
			20	0.150211	0.004087		0.156998	0.0048					0.001829	0.00087133			Median of column A	0.002564
			22	0.150623	0.004055		0.156451	0.004907					0.024831	0.00071586			Median of column B	0
			24	0.149424	0.004028		0.157504	0.005006					0.003792	0			Difference: Actual	-0.002564
			26	0.149246	0.004077		0.157125	0.005158					0.001971	0.00027023			Difference: Hodges-Lehmann	-0.002167
			28	0.149497	0.004093		0.157124	0.0052					0.001894	0.00019571
			30	0.148775	0.004075		0.156132	0.004519					0.000165	0.00109272
			32	0.149039	0.004088		0.15515	0.004204					0.001269	0
			34	0.148828	0.004207		0.155229	0.00392					0.025014	0.00083553
			36	0.149611	0.004364		0.154574	0.004213					0.012243	0
			38	0.149418	0.004369		0.157401	0.004699					0.002576	0.00033763
			40	0.149679	0.004354		0.157219	0.004964					0.00101	0
			42	0.15116	0.004407		0.158377	0.004645					0.001583	0
			44	0.151282	0.00444		0.156596	0.004313					0.063371	0
			46	0.151165	0.004187		0.157752	0.004165					0.009523	0.00069852
			48	0.150378	0.004214		0.157686	0.004182					0.004405	0.00186786
			50	0.150835	0.004121		0.156121	0.00405					0.010508	0.00012893
			52	0.151501	0.004227		0.154103	0.003959					0.00028	0.00024036
			54	0.15172	0.004164		0.152368	0.003708					0.003332	0.00043508
			56	0.151439	0.004283		0.152811	0.004106					0.011725	0
			58	0.15154	0.004267		0.153092	0.00456					0.049242	0.00046414
			60	0.152567	0.00431		0.154184	0.004532					0	0.00061804
			62	0.153242	0.004336		0.154196	0.004158					0.000696	0
			64	0.152959	0.004435		0.155191	0.003907					0	0.00089066
			66	0.151863	0.004267		0.154559	0.003928					0.000264	0
			68	0.151223	0.004249		0.15291	0.004049					0.010897	0
			70	0.151545	0.004167		0.152803	0.00418					0	0
			72	0.151318	0.004179		0.152924	0.004008					0.007973	0
			74	0.151708	0.004201		0.154606	0.004206					0.027154	0.00098477
			76	0.15108	0.004183		0.154779	0.004192					0.044952	0
			78	0.152023	0.004222		0.155797	0.00449					2.68e-05	0.00132448
			80	0.151662	0.004074		0.156718	0.004411					0.039106	0.00040718
			82	0.151787	0.004099		0.156128	0.004553					0.021664	0.00013151
			84	0.150107	0.004135		0.154974	0.004478					0.000853	0
			86	0.149677	0.00428		0.153894	0.004846					0.020868	0.00012866
			88	0.148361	0.004411		0.153479	0.004661					0.002983	0
			90	0.148561	0.004415		0.15442	0.005054					0.063292	0
			92	0.150026	0.004427		0.154878	0.005232					9.36e-05	0
			94	0.151318	0.004366		0.156573	0.005613					0.00086	0
			96	0.151159	0.004351		0.155039	0.00537					0.001364	0.00079174
			98	0.14938	0.004181		0.156331	0.005233					0	0
			100	0.149636	0.004046		0.155079	0.004801					0.000829	0
			102	0.163439	0.008004		0.159151	0.005048					0.01861	0.00054496
			104	0.23649	0.025302		0.205915	0.022903					0.057271	0
			106	0.363692	0.047876		0.286787	0.047017					0.000381	0.00116655
			108	0.491001	0.0666		0.404704	0.068703					0.000677	0.00141607
			110	0.553213	0.070561		0.490802	0.074996					0.000866	0.00021733
			112	0.565709	0.067328		0.567883	0.073136					0.000536	0.0003247
			114	0.57632	0.067787		0.602522	0.068954					0.049175	0.00017132
			116	0.602822	0.069819		0.628131	0.066815					0	0.00048312
			118	0.618703	0.072483		0.608373	0.061366					0.010562	0
			120	0.632661	0.072902		0.575045	0.059669					0.001802	0.00084392
			122	0.643405	0.071433		0.524452	0.056987					0.005714	0.00058756
			124	0.655281	0.070764		0.487052	0.054447					0.000836	0
			126	0.653575	0.069704		0.470188	0.054766					0.003711	0.00060907
			128	0.634828	0.06529		0.465931	0.054255					0.001236	0
			130	0.61684	0.062127		0.458472	0.052488					0.001838	0
			132	0.613812	0.060686		0.443355	0.046443					8.17e-05	0
			134	0.61295	0.059639		0.427214	0.044609					0.001889	0
			136	0.59837	0.058476		0.413055	0.045772					1.46e-05	1.3393e-05
			138	0.571261	0.056179		0.400971	0.044993					0.001296	0.00093736
			140	0.549489	0.051205		0.381937	0.043517					0.001467	0
			142	0.538795	0.048939		0.356345	0.040105					6.53e-05	0.00047638
			144	0.537279	0.048674		0.327163	0.03547					0.000986	0
			146	0.522182	0.046875		0.314682	0.032646					0.001471	0
			148	0.488903	0.044446		0.320558	0.037775					0.052414	0
			150	0.450249	0.040289		0.324477	0.04081					0.029503	0.00035717
			152	0.43098	0.037727		0.310172	0.038113					0.058031	5.8504e-05
			154	0.425847	0.038318		0.28382	0.033359					0	-0.0003552
			156	0.41936	0.038086		0.253907	0.026978					0.00033	4.854e-05
			158	0.390579	0.036692		0.233848	0.021856					0.007375	0.00354303
			160	0.355161	0.034186		0.226539	0.020559					0.002196	0
			162	0.320571	0.027929		0.230818	0.025868					0.000157	0
			164	0.300248	0.026303		0.227948	0.029298					0.063876	0.00040224
			166	0.282748	0.027137		0.214716	0.026778					0.006833	0
			168	0.26092	0.025076		0.195407	0.018678					0	2.3802e-05
			170	0.234557	0.020663		0.181241	0.013504					0.050342	0
			172	0.21313	0.017372		0.172554	0.010791					0.042219	0.00177996
			174	0.197427	0.015458		0.166317	0.009357					0.00795	0.0128268
			176	0.18427	0.013246		0.160938	0.008207					0.05608	0.00051405
			178	0.172976	0.011484		0.158262	0.007271					0.002564	0
			180	0.162889	0.010056		0.156267	0.006545					0.002821	0.00150583
			182	0.154645	0.009174		0.154893	0.005537					0.001357	0
			184	0.149588	0.008699		0.152936	0.004756					0.015165	0
			186	0.145336	0.008427		0.150022	0.004132					0.058621	0
			188	0.142059	0.007941		0.148512	0.00408					0.061513	0
			190	0.138145	0.00739		0.148188	0.004142					0.007223	0
			192	0.137004	0.006916		0.147658	0.004508					0.040719	0
			194	0.136539	0.006579		0.14753	0.004661					0.004725	0
			196	0.13764	0.006412		0.146576	0.004218					0.041035	0.00146611
			198	0.137089	0.006308		0.14564	0.004117					0	0.00033385
			200	0.136202	0.006125		0.144454	0.004099					0.002417	0
			202	0.135791	0.005998		0.141362	0.004254					0	0
			204	0.136194	0.005898		0.140174	0.004254					0.000407	0.00016572
			206	0.136174	0.005907		0.140336	0.004264					0.000695	0.00115182
			208	0.135505	0.005829		0.141721	0.004183					0.000105	0
			210	0.135108	0.005659		0.142854	0.004011					0.003278	0
			212	0.134473	0.005267		0.145107	0.004278					0.000349	0.00029042
			214	0.133687	0.004985		0.148467	0.00493					0.004647	0
			216	0.132407	0.004789		0.158241	0.009346					0	0
			218	0.132734	0.00473		0.162859	0.013741					0.004997	0.00016844
			220	0.132697	0.004446		0.165855	0.015075					0.007708	0
			222	0.132438	0.004189		0.15855	0.010106					0.050207	0.00019576
			224	0.131875	0.004114		0.152972	0.00683					0.000981	0
			226	0.131193	0.004234		0.148452	0.005501					0.000563	0
			228	0.13035	0.00438		0.148591	0.005061					0.018174	0
			230	0.128739	0.004355		0.147719	0.004669					0.055053	0
			232	0.128511	0.00428		0.145985	0.003924					0.043996	0.00010508
			234	0.129227	0.004055		0.1427	0.003687					0.017673	0
			236	0.129863	0.004069		0.140897	0.003599					0.001363	0
			238	0.129181	0.004023		0.140656	0.003763					0.039145	0
			240	0.129404	0.004103		0.137453	0.003659					0.001312	0
			242	0.130065	0.004018		0.13686	0.003771					0.034195	0
			244	0.131257	0.003974		0.135955	0.003741					0.002055	0
			246	0.13109	0.004066		0.137487	0.004067					0.042336	0
			248	0.131566	0.004104		0.136701	0.004033					0.009868	0.00042971
			250	0.139795	0.003837		0.136992	0.00405					0.009188	0
			252	0.181967	0.008792		0.137258	0.004052					0.000344	0.00040209
			254	0.246368	0.02086		0.138462	0.003892					0.021888	0.00046416
			256	0.320203	0.035028		0.137987	0.003885					0.0087	0
			258	0.369873	0.044508		0.138709	0.004093					0.015749	0
			260	0.407245	0.05172		0.138039	0.004125					0.001219	0
			262	0.439542	0.057596		0.138153	0.004139					0.018135	0.00013448
			264	0.460672	0.061803		0.1357	0.004061					0.010325	0.0102012
			266	0.48026	0.065336		0.134841	0.004037					0.002149	0
			268	0.496083	0.06884		0.135634	0.004003					0.001163	0
			270	0.515946	0.07223		0.136464	0.003964					0.000735	0
			272	0.530162	0.074498		0.137353	0.004001					0.002584	0
			274	0.54498	0.076863		0.13613	0.003874					0.044436	0.00035722
			276	0.558244	0.07871		0.137419	0.00364					0.004722	0
			278	0.569915	0.08005		0.138226	0.003668					0.001248	0.00013495
			280	0.578078	0.081109		0.138293	0.003471					0.003238	0.00086687
			282	0.581175	0.081585		0.140309	0.003615					0.000313	0.00110887
			284	0.583448	0.082213		0.141287	0.003843					0.000819	0.00024153
			286	0.58099	0.081669		0.142932	0.00409					0.001206	0
			288	0.5756	0.080573		0.142794	0.004218					0.00145	0
			290	0.563626	0.078558		0.141206	0.004035					0.001328	0
			292	0.54797	0.075883		0.142678	0.003671					0.001552	0
			294	0.529901	0.073268		0.143205	0.003478					0.062024	2.2816e-07
			296	0.511023	0.070225		0.145315	0.003429					0.053807
			298	0.493718	0.06712		0.145811	0.003857					0.000157
			300	0.473497	0.06306		0.1452	0.003821					0.000552
			302	0.451368	0.058594		0.145872	0.003963					0.022122
			304	0.433687	0.055668		0.144067	0.003955					0.001191
													0.001545
													0.000924

## Sheet: Fig. 3C
			Figure 3 (trace, far left panel)										Figure 3C (bar-graph, left panel)									Figure 3C (bar-graph, middle panel)								Figure 3C (bar-graph, right panel)
			Average Store-operated Ca2+ Entry (SOCE) Trace										Thapsigargin (TG) store-release (AUC/min.)									SOCE quantified on a single-cell basis as Rate after 1mM Ca2+ readdition								SOCE quantified on a single-cell basis as peak Ca2+ after 1mM Ca2+ readdition
			X-axis: Time (sec), Y-axis: Fluo-4/Fura-Red Ratio; SEM- Std. error of mean										each data point is from a single cell.
																						SOCE Rate								SOCE Peak
				Time (s)	WT			TREM2 KO						WT	TREM2 KO							WT	TREM2 KO							WT	TREM2 KO
					Mean	SEM		Mean	SEM					column A	column B							column C	column D							column A	column B
		cells in 1(mM)Ca2+		0	0.17789	0.00386048		0.229278	0.00530823					24.6021	8.27606		Mann Whitney test					0.057485	0.138782		Mann Whitney test					1.56747	1.93367		Mann Whitney test
				3	0.17821	0.00374284		0.232573	0.00745285					11.0555	11.0421		P value	0.3413				0.102905	0.103937		P value	< 0.0001				2.04563	1.84765		P value	< 0.0001
				6	0.181301	0.00363116		0.241904	0.0110348					13.3996	10.6085		Exact or approximate P value?	Approximate				0.09707	0.099682		Exact or approximate P value?	Approximate				2.03567	1.30619		Exact or approximate P value?	Approximate
				9	0.184255	0.00386128		0.241151	0.0085152					14.3874	9.10871		P value summary	ns				0.222559	0.166948		P value summary	****				2.69706	2.08151		P value summary	****
				12	0.17951	0.00378515		0.235457	0.00649344					10.9956	9.79199		Significantly different? (P < 0.05)	No				0.085306	0.158871		Significantly different? (P < 0.05)	Yes				1.99162	1.95945		Significantly different? (P < 0.05)	Yes
				15	0.179543	0.00383572		0.234331	0.0057887					9.55711	9.64323		One- or two-tailed P value?	Two-tailed				0.151473	0.134132		One- or two-tailed P value?	Two-tailed				1.99222	1.8533		One- or two-tailed P value?	Two-tailed
				18	0.180338	0.00367517		0.23722	0.00579351					14.3226	9.18805		Sum of ranks in column A,B	61688 , 41143				0.210482	0.161804		Sum of ranks in column C,D	67076 , 35756				2.47001	2.12902		Sum of ranks in column A,B	66866 , 35965
				21	0.179847	0.0035579		0.230944	0.00542904					15.0804	9.4061		Mann-Whitney U	23565				0.200268	0.13964		Mann-Whitney U	18178				2.45398	2.14917		Mann-Whitney U	18387
				24	0.183194	0.00368137		0.23062	0.00536748					10.045	11.2554							0.055607	0.171602							0.98205	2.35015
				27	0.182675	0.0038715		0.234314	0.005666					10.8942	13.5352		Difference between medians					0.134644	0.135665		Difference between medians					1.67035	1.97984		Difference between medians
				30	0.180343	0.00372353		0.231371	0.00547229					10.7364	16.4813		Median of column A	11.03				0.126502	0.15822		Median of column C	0.1549				2.19057	2.08839		Median of column A	2.143
				33	0.181309	0.00381823		0.241848	0.0140795					13.4592	14.8747		Median of column B	10.73				0.125687	0.114839		Median of column D	0.1381				2.17979	1.8339		Median of column B	1.91
				36	0.17999	0.0037134		0.238198	0.012803					12.9899	16.8863		Difference: Actual	-0.3012				0.162094	0.151432		Difference: Actual	-0.01681				2.15548	2.17829		Difference: Actual	-0.2329
				39	0.179787	0.00354842		0.229918	0.00788839					9.39258	13.781		Difference: Hodges-Lehmann	-0.3064				0.143868	0.208316		Difference: Hodges-Lehmann	-0.01689				1.78092	2.50525		Difference: Hodges-Lehmann	-0.159
				42	0.180564	0.00385143		0.226108	0.00621816					12.0433	6.71447							0.14204	0.115091							1.77887	1.47355
				45	0.18101	0.00385274		0.226698	0.00562108					15.5579	7.91414							0.104841	0.06548							1.45889	1.47757
				48	0.180827	0.00391214		0.227067	0.00550509					13.1316	9.84678							0.12167	0.127404							2.31624	1.57808
				51	0.179189	0.0038506		0.225702	0.00537741					12.6174	10.1745							0.094259	0.174942							1.90231	2.08538
				54	0.181838	0.003876		0.226547	0.0055186					10.6686	5.81708							0.146704	0.174831							1.94032	2.18547
				57	0.182901	0.00376339		0.223495	0.00533277					13.7282	10.7237							0.203451	0.139976							2.54672	1.78843
				60	0.182504	0.00395855		0.221622	0.00511031					12.1555	7.93245							0.119103	0.167262							1.74008	1.9476
				63	0.175632	0.00371459		0.220401	0.00534606					8.90833	11.3364							0.104023	0.12526							1.31908	1.62213
				66	0.175334	0.00368416		0.222196	0.00527144					12.8688	13.613							0.141608	0.142257							1.96985	1.78165
				69	0.174459	0.0038674		0.221902	0.00543393					9.69958	11.5933							0.202246	0.154995							2.41139	1.92342
				72	0.172414	0.00369093		0.230515	0.0138137					18.2848	8.31313							0.064136	0.13256							2.41978	2.29291
				75	0.174017	0.00381608		0.228853	0.0114911					13.1469	9.72911							0.137123	0.141581							1.58861	1.75569
				78	0.171229	0.00354158		0.225656	0.00785188					17.7427	10.7307							0.057272	0.136189							1.12314	1.96886
				81	0.169578	0.00340317		0.224516	0.00686378					14.9702	11.9823							0.168471	0.175288							1.976	2.44466
				84	0.172705	0.0035846		0.23306	0.00784045					10.3625	9.88818							0.156726	0.16329							1.86972	2.30914
				87	0.172402	0.0034797		0.286617	0.026042					12.2647	15.2351							0.004782	0.08533							0.574615	1.44602
				90	0.170544	0.00342996		0.301645	0.0256065					14.7915	11.7315							0.125878	0.096132							1.40571	1.25848
				93	0.173374	0.00373422		0.289268	0.0192416					11.9038	12.5624							0.082814	0.14044							0.930599	2.08999
				96	0.171006	0.00359637		0.258589	0.0115859					13.1568	5.68082							0.14802	0.101961							1.94275	1.82255
				99	0.174109	0.00368657		0.248062	0.00778736					9.68359	6.94555							0.164718	0.169685							2.37744	2.30466
				102	0.172503	0.0035735		0.234699	0.00611908					10.1189	10.8851							0.165533	0.180348							2.08049	2.33338
				105	0.175072	0.00352748		0.230315	0.00588133					8.10726	10.241							0.105796	0.159492							2.13265	2.38528
				108	0.170855	0.00327856		0.228989	0.00554204					13.7441	16.123							0.19274	0.181281							2.4624	2.26652
				111	0.174889	0.00361342		0.226534	0.00607698					11.5942	10.7569							0.14679	0.087454							2.10521	1.32849
				114	0.17351	0.00343775		0.229897	0.00744768					10.3937	6.91151							0.165466	0.062568							1.97992	1.25133
				117	0.174136	0.00359997		0.229299	0.0093542					14.174	8.1774							0.174929	0.070702							2.3639	0.921236
				120	0.175344	0.00345219		0.232309	0.00808657					13.6006	10.9433							0.180633	0.121234							2.22449	1.57867
				123	0.173262	0.0034531		0.231899	0.00868964					7.64688	11.8935							0.160646	0.177955							2.35474	2.43363
				126	0.175796	0.0036501		0.232066	0.00979124					7.4287	12.9923							0.185631	0.154248							2.42172	1.90575
				129	0.175426	0.00369063		0.230222	0.00853773					9.11199	7.01538							0.071622	0.187578							1.54721	2.21641
				132	0.172028	0.00331455		0.223886	0.00694822					10.4419	7.2298							0.165997	0.180136							2.20246	2.21039
		0(mM)Ca 2mM TG		135	0.173729	0.00349388		0.221634	0.00582316					9.16969	8.36928							0.1801	0.093208							2.31314	2.30502
				138	0.171543	0.00324449		0.214229	0.00530962					12.9078	11.2061							0.151212	0.093362							2.49774	1.82818
				141	0.173307	0.00356372		0.212856	0.00496068					10.5345	9.58679							0.131864	0.137376							2.12956	2.01729
				144	0.170512	0.00344593		0.212091	0.00498133					14.2298	15.3647							0.164162	0.155865							2.13506	2.40786
				147	0.172592	0.00367191		0.211537	0.00471093					9.6351	16.68							0.131477	0.098472							1.82873	1.57908
				150	0.171427	0.00337287		0.209644	0.00502671					10.6599	8.11041							0.161358	0.125715							2.26407	1.6563
				153	0.172815	0.00363055		0.212171	0.00524662					13.5782	13.474							0.157365	0.139843							2.28225	1.83178
				156	0.19333	0.00602018		0.234653	0.0100029					9.51448	15.1954							0.143189	0.129736							2.12447	1.62183
				159	0.224742	0.00591038		0.275514	0.0119352					6.7446	10.095							0.160459	0.174602							2.00529	2.4914
				162	0.277446	0.0063697		0.340878	0.0129145					12.6372	14.5319							0.184251	0.16318							2.39901	2.14477
				165	0.345878	0.0105285		0.407932	0.0137598					13.0033	10.3095							0.173263	0.14295							2.36545	1.83462
				168	0.41302	0.0112027		0.479721	0.013641					15.9363	10.3287							0.161072	0.147362							2.20651	2.00337
				171	0.469237	0.0113314		0.553903	0.0147595					7.80379	14.8435							0.139761	0.181509							2.15744	2.29493
				174	0.513596	0.0107454		0.620086	0.0160175					8.8539	13.6567							0.107968	0.155848							1.72087	2.3728
				177	0.551523	0.0107311		0.661329	0.0152678					21.3583	10.1176							0.041419	0.145734							1.08219	1.8585
				180	0.574704	0.0103976		0.703636	0.0151396					11.4565	11.5342							0.172351	0.118561							2.23448	1.8824
				183	0.593799	0.0100504		0.725326	0.0146924					7.89193	7.67276							0.160399	0.173019							2.29365	2.30123
				186	0.602799	0.0101954		0.735405	0.0136189					9.30334	9.54026							0.160813	0.11137							2.25446	1.48409
				189	0.617988	0.0101792		0.738152	0.0135367					8.45636	9.92951							0.176214	0.133298							2.19787	2.02163
				192	0.620166	0.0103049		0.732387	0.0130882					14.2906	9.16368							0.183647	0.130534							2.41189	1.67241
				195	0.623683	0.0102522		0.733763	0.01209					12.2935	10.9626							0.182528	0.15424							2.2199	1.95853
				198	0.621168	0.0105184		0.720947	0.0127393					7.47883	11.5677							0.162082	0.127164							2.18708	1.97846
				201	0.613036	0.00992569		0.716547	0.012056					8.81277	7.87918							0.159854	0.171796							2.27552	2.18006
				204	0.608726	0.00999531		0.709601	0.0125349					16.4232	9.88914							0.147313	0.140692							2.19845	2.0376
				207	0.608881	0.0104412		0.704419	0.0128046					14.6084	10.4288							0.147367	0.105064							2.19138	1.4532
				210	0.608845	0.0100797		0.694788	0.0119539					9.09667	8.96907							0.204956	0.135143							2.2874	1.89486
				213	0.600918	0.00974809		0.695823	0.0121436					10.3659	11.3649							0.159105	0.126713							2.11916	2.04386
				216	0.599448	0.0102065		0.680037	0.0112334					21.2334	16.2382							0.040002	0.136204							1.22149	1.67553
				219	0.595658	0.0098859		0.681561	0.0119445					11.6707	9.47061							0.201126	0.062186							2.52208	2.27364
				222	0.591783	0.0101277		0.664595	0.0108509					13.6805	9.11026							0.183846	0.156593							2.30003	2.28593
				225	0.587832	0.00993189		0.66378	0.0111032					6.03468	8.59065							0.176616	0.10369							2.15545	1.52558
				228	0.573916	0.00964266		0.652955	0.0117966					13.3566	9.12547							0.208031	0.131619							2.43296	2.38271
				231	0.565223	0.00980273		0.64723	0.0113551					11.1723	9.50373							0.166137	0.152955							2.28193	1.97046
				234	0.576768	0.0100372		0.639797	0.0118923					16.7162	6.07199							0.156896	0.107523							2.22645	1.25709
				237	0.569183	0.00983862		0.631075	0.0112683					20.5286	10.2997							0.156604	0.149983							2.31163	2.01644
				240	0.566645	0.0100507		0.625085	0.0118382					9.74053	6.18227							0.159782	0.100759							2.23201	1.30756
				243	0.564051	0.0106203		0.623152	0.0113747					17.9527	10.6855							0.155604	0.160538							2.33903	2.29209
				246	0.550162	0.00956842		0.616306	0.0121249					9.1276	11.1471							0.16571	0.13069							2.24578	1.62064
				249	0.544003	0.00942063		0.600194	0.0111139					10.7921	12.3089							0.169484	0.082992							2.2668	1.13779
				252	0.546897	0.00899363		0.59958	0.0114162					16.2019	18.5475							0.132477	0.124257							1.9389	1.69555
				255	0.54121	0.00973246		0.590649	0.0112486					11.0745	13.0142							0.146301	0.133125							1.9439	2.03863
				258	0.537213	0.00968685		0.584114	0.0113108					11.6567	5.42547							0.182278	0.108566							2.2437	1.79629
				261	0.52753	0.00945115		0.576631	0.0108641					9.25134	12.0317							0.115261	0.132765							1.82155	1.77583
				264	0.517474	0.00933168		0.568733	0.011128					10.0781	15.5394							0.134513	0.100426							1.67417	2.13219
				267	0.513168	0.00887839		0.562756	0.0111604					14.0664	4.68495							0.148886	0.042045							2.14456	1.42232
				270	0.513813	0.00914333		0.559576	0.010866					8.63518	12.5022							0.162433	0.156101							2.37164	2.04862
				273	0.513429	0.0095198		0.550158	0.0109033					7.6703	7.00599							0.151988	0.125509							2.27049	1.81536
				276	0.503449	0.00892758		0.539039	0.0111941					12.6433	5.05187							0.084275	0.049667							1.04876	1.88418
				279	0.495506	0.00882139		0.532159	0.011415					11.3715	9.48907							0.195059	0.206313							2.40483	2.28494
				282	0.490616	0.00894099		0.530464	0.0114258					11.0085	11.4772							0.163031	0.174181							2.17146	2.04286
				285	0.487737	0.00865208		0.522379	0.0109059					13.2093	6.2023							0.102385	0.091658							1.80921	1.73645
				288	0.478903	0.00906726		0.509519	0.0110533					15.3329	24.6286							0.089961	0.123542							1.40784	1.82353
				291	0.475277	0.00894757		0.504316	0.0111607					6.45698	11.8975							0.070896	0.172664							0.868923	2.42444
				294	0.464438	0.00867648		0.49544	0.0111338					8.44065	9.44939							0.160293	0.126575							2.09961	1.62979
				297	0.463928	0.00873311		0.484333	0.0111638					9.29433	13.8746							0.092499	0.142629							1.21673	1.84911
				300	0.459067	0.00859666		0.482057	0.0111853					7.72717	12.3555							0.173735	0.100485							2.16797	1.34666
				303	0.448873	0.00851223		0.477106	0.011073					11.7638	7.60577							0.177281	0.110801							2.24334	1.61196
				306	0.446587	0.00866281		0.462947	0.0110391					11.6449	13.0325							0.142019	0.165421							2.2202	2.3927
				309	0.438105	0.00874779		0.451707	0.0105868					11.2164	10.2512							0.175073	0.15288							2.32448	2.12403
				312	0.432662	0.00842523		0.443141	0.0108181					11.2568	13.1319							0.225324	0.1556							2.46579	2.37163
				315	0.434959	0.00873956		0.44385	0.0107282					13.8554	16.554							0.176038	0.188945							2.22047	2.30732
				318	0.42566	0.00906391		0.428615	0.0107608					8.37652	12.0696							0.194013	0.124717							2.2265	1.82868
				321	0.416168	0.00843509		0.426484	0.0105144					7.80409	17.2177							0.192522	0.048464							2.46332	2.0583
				324	0.408994	0.00849656		0.417058	0.0102909					10.6199	14.6796							0.1342	0.156592							2.15727	1.88087
				327	0.410151	0.00837997		0.409516	0.0101518					12.8308	18.383							0.200856	0.139257							2.71513	2.15489
				330	0.405819	0.00854873		0.397054	0.0102977					16.2457	6.13709							0.234511	0.112364							2.65907	1.69439
				333	0.396477	0.00852683		0.39399	0.0100156					12.5337	9.84337							0.197139	0.156065							2.63916	1.7141
				336	0.39341	0.00820717		0.388123	0.010176					13.269	11.1573							0.170635	0.168895							2.06415	1.92459
				339	0.391658	0.00813621		0.382112	0.0102232					9.76646	14.0899							0.131114	0.158379							2.21657	1.96389
				342	0.380552	0.00834784		0.372937	0.00984803					9.90373	20.8812							0.097536	0.11105							1.58384	2.07575
				345	0.372358	0.00784626		0.36309	0.0100849					14.0982	5.37951							0.177516	0.016452							2.42606	1.06036
				348	0.370109	0.00831997		0.361494	0.0102756					11.1693	14.6226							0.179479	0.138064							2.27754	2.11657
				351	0.368454	0.00830698		0.353818	0.0105346					10.5034	5.50524							0.184134	0.119613							2.26688	1.41718
				354	0.364093	0.00834282		0.34682	0.010503					5.24253	17.7491							0.130738	0.097648							1.74066	1.66728
				357	0.356213	0.00806108		0.343076	0.00983961					10.8574	22.4211							0.096667	0.152832							1.59487	1.89451
				360	0.352185	0.00812958		0.338342	0.00996099					8.79437	6.93436							0.121997	0.048739							1.74418	1.6688
				363	0.345786	0.00817859		0.332063	0.00999958					21.9794	11.1407							0.036357	0.111038							1.34035	2.1683
				366	0.341273	0.00822886		0.327373	0.010193					11.8668	9.24418							0.139958	0.131413							2.08869	1.86026
				369	0.334819	0.00795523		0.317071	0.0098585					15.7469	11.0889							0.098965	0.12435							1.94018	2.24929
				372	0.331472	0.00816752		0.309069	0.00926714					11.4754	8.22473							0.162601	0.136827							2.21949	1.76587
				375	0.32573	0.00824365		0.302592	0.00935171					7.97646	11.0243							0.149561	0.138349							2.3658	1.89569
				378	0.322909	0.00794926		0.300189	0.00949676					5.91199	10.7957							0.133295	0.120142							2.28483	1.81198
				381	0.313588	0.00804242		0.292753	0.00932662					8.34767	10.9281							0.18909	0.124571							2.21178	1.82605
				384	0.310989	0.00778368		0.285024	0.00901463					11.7012	20.9079							0.148314	0.171577							2.18137	2.33665
				387	0.306611	0.00797676		0.283644	0.00898887					16.7572	9.64003							0.207247	0.103573							2.49524	1.602
				390	0.301069	0.00771091		0.275429	0.00870207					25.5207	7.02261							0.053319	0.079879							1.32831	1.69355
				393	0.29648	0.0077146		0.272248	0.00899156					8.66895	2.31033							0.157926	0.145121							2.11123	2.19037
				396	0.289955	0.00727389		0.271356	0.00852676					7.31611	14.2778							0.079906	0.150224							1.39398	1.70234
				399	0.283936	0.00785694		0.259173	0.00874621					9.2225	8.78488							0.117491	0.147073							1.89918	2.27444
				402	0.282058	0.00757815		0.259095	0.00843999					21.4903	15.2718							0.114121	0.114165							1.43085	2.04478
				405	0.275856	0.007345		0.257354	0.00828606					12.4246	10.3734							0.174249	0.192558							2.24864	2.42375
				408	0.273478	0.00745134		0.252053	0.00806703					6.7664	13.8805							0.176731	0.145034							2.30777	1.93057
				411	0.26597	0.00698471		0.247921	0.00821612					9.73009	13.0859							0.133667	0.15766							2.03645	1.89908
				414	0.263352	0.00702659		0.243553	0.00795167					5.66312	12.7084							0.054495	0.155413							1.17683	2.34397
				417	0.259499	0.00711356		0.240272	0.00743798					24.0686	14.4661							0.061129	0.163462							1.41682	1.90596
				420	0.255024	0.00690275		0.239554	0.0076473					11.5346	10.4053							0.147927	0.159782							2.29578	2.23246
				423	0.25888	0.00718491		0.234105	0.00717966					13.5135	6.5151							0.180536	0.048038							2.07349	1.09954
				426	0.251575	0.00715657		0.232565	0.00749128					16.8734	11.1674							0.175869	0.119647							2.35584	1.34834
				429	0.246171	0.00688175		0.231741	0.00739196					12.6586	12.2461							0.151271	0.144445							1.92324	1.7735
				432	0.242035	0.00683259		0.229183	0.00722643					7.54185	8.54605							0.154006	0.101152							1.88394	2.14337
				435	0.242965	0.00679669		0.225532	0.0070921					9.85376	8.18811							0.187244	0.107753							2.15362	1.30287
				438	0.237608	0.00657243		0.223765	0.00721668					15.6774	14.0752							0.18706	0.152389							2.25427	2.17209
				441	0.234235	0.00641354		0.223483	0.00663851					11.6911	11.6366							0.229141	0.155043							2.39932	1.84219
				444	0.232773	0.00630085		0.220826	0.00684545					13.885	8.31818							0.057826	0.143195							1.57521	1.82607
				447	0.228789	0.00650503		0.21692	0.00669133					10.3328	14.4986							0.058332	0.143929							1.591	1.91305
				450	0.228442	0.00631613		0.213078	0.00634088					15.3042	5.73445							0.118588	0.147047							1.94701	2.18774
				453	0.22141	0.00624814		0.211404	0.00646972					14.5128	6.64181							0.171687	0.112994							2.54645	1.79714
				456	0.219921	0.00611137		0.210989	0.00629324					10.5679	12.1319							0.015136	0.162661							1.14098	1.90985
				459	0.216675	0.00600968		0.211061	0.00612353					10.6597	3.60599							0.088682	0.073807							2.27514	1.5187
				462	0.216312	0.00611289		0.205318	0.00610078					11.7169	11.3255							0.112388	0.142157							1.76988	1.88635
				465	0.210568	0.00585136		0.203669	0.00607992					12.5803	10.0959							0.116747	0.140769							1.72035	1.79195
				468	0.213109	0.00582746		0.201297	0.00558155					10.2776	15.3744							0.093785	0.09556							1.65732	1.71967
				471	0.207327	0.00559229		0.203306	0.00594954					13.0646	10.3771							0.182215	0.170667							2.28175	2.08936
				474	0.206383	0.00571368		0.200066	0.00577528					8.08875	12.8879							0.18288	0.175319							2.37958	2.39052
				477	0.204748	0.00569604		0.200424	0.0057817					10.5829	9.24092							0.16583	0.082121							2.06072	1.21139
				480	0.19942	0.00546384		0.19979	0.00551326					19.2308	12.1213							0.121808	0.128207							1.75665	1.62035
				483	0.202167	0.00571081		0.196156	0.00556104					14.4344	14.01							0.091668	0.146893							1.99585	1.71612
				486	0.201004	0.00563115		0.195862	0.005251					12.6077	10.9629							0.134092	0.119691							2.00938	1.83345
				489	0.196901	0.00551328		0.191279	0.00521118					15.0816	12.1346							0.21924	0.171977							2.68341	2.14479
				492	0.19644	0.00569102		0.189995	0.00527138					9.75312	7.31786							0.139686	0.186376							2.06974	2.06924
				495	0.194506	0.00527467		0.193133	0.00505181					13.863	7.14667							0.130239	0.137088							1.92894	1.67215
				498	0.194295	0.00525607		0.191679	0.00517017					13.7814	16.7753							0.12566	0.164539							2.17445	2.46073
				501	0.192648	0.00499868		0.191108	0.00501672					13.3266	22.2766							0.125651	0.114379							1.64106	2.03845
				504	0.191754	0.00516248		0.186937	0.00517105					8.76022	16.5303							0.186104	0.172314							2.31252	2.19487
				507	0.192027	0.00509965		0.186719	0.00532643					8.17858	6.61347							0.16366	0.141635							2.17016	1.83292
				510	0.190198	0.00500158		0.188022	0.0049483					13.8873	9.38843							0.132893	0.116061							2.47994	1.42656
				513	0.188578	0.00503615		0.186138	0.00479657					11.9961	10.7004							0.1793	0.092973							2.05022	1.33752
				516	0.184353	0.00493413		0.182169	0.00473783					13.6784	10.6582							0.132697	0.164089							1.68421	2.02174
				519	0.18254	0.0047462		0.183017	0.00496553					15.502	11.2989							0.190467	0.043391							2.40101	1.40757
				522	0.178908	0.00458738		0.180852	0.00496137					15.3842	13.593							0.178469	0.135646							2.4516	1.7585
				525	0.179581	0.00469707		0.182469	0.00503728					11.0879	18.0796							0.163552	0.035007							2.05003	2.38282
				528	0.180656	0.00472725		0.180627	0.00484863					8.68635	10.6978							0.128163	0.116369							2.03496	2.30381
				531	0.175646	0.00466665		0.181154	0.00493179					13.5858	21.1711							0.228425	0.136775							2.66617	2.15796
				534	0.17708	0.00464276		0.17954	0.00484498					9.63507	9.73298							0.1463	0.130126							1.78175	1.70248
				537	0.17415	0.00448923		0.178779	0.00472947					15.4203	3.79708							0.164068	0.136779							2.16119	2.14253
				540	0.173715	0.0046386		0.180728	0.00461939					10.7855	12.398							0.16407	0.155477							2.50727	2.12145
				543	0.170503	0.00455814		0.178631	0.00442435					30.5612	5.26781							0.102062	0.039579							1.72121	1.18114
				546	0.168114	0.00435262		0.177461	0.00454327					7.60994	8.94438							0.121638	0.169612							1.78726	2.50534
				549	0.168582	0.00425457		0.177217	0.00437662					12.0655	18.3078							0.160922	0.123212							2.48762	1.65637
				552	0.168549	0.00440584		0.179715	0.00461762					15.5597	8.6229							0.17633	0.147505							2.31614	1.67658
				555	0.169847	0.00434669		0.177025	0.00440556					9.49514	13.1867							0.196007	0.162193							2.29572	1.99528
				558	0.16764	0.00438524		0.180111	0.00441381					8.25943	9.68744							0.128788	0.148962							1.75234	2.14094
				561	0.164952	0.00408354		0.174876	0.00416054					7.34258								0.150219								1.89541
				564	0.164343	0.00406489		0.174948	0.00439748					7.1088								0.123838								1.70053
				567	0.164876	0.00410794		0.176812	0.00436611					16.0195								0.141797								2.02321
				570	0.161745	0.00400366		0.17696	0.00444069					9.06								0.156212								2.05284
				573	0.161409	0.00419384		0.177844	0.0046919					11.5539								0.14251								1.94454
				576	0.163257	0.00419146		0.177312	0.00445684					12.9244								0.16477								2.15274
				579	0.159417	0.00382898		0.172914	0.00410647					6.39086								0.136271								2.0691
				582	0.156413	0.00388804		0.170206	0.00426994					17.0048								0.172211								2.4786
		1mM Ca2+		585	0.15532	0.00385558		0.172535	0.00403104					8.63615								0.214552								2.36361
				588	0.156698	0.00384392		0.174208	0.00421065					10.0707								0.154151								2.18852
				591	0.156173	0.00367202		0.174319	0.00419684					7.47559								0.164744								2.18838
				594	0.157584	0.00374404		0.172846	0.00442264					6.76733								0.070513								1.28031
				597	0.155314	0.00377241		0.172115	0.004243					7.46124								0.098306								1.7354
				600	0.162475	0.00368984		0.16983	0.00403248					12.3134								0.182957								2.27129
				603	0.806534	0.0228786		0.434715	0.0111226					13.2281								0.195587								2.47419
				606	1.25455	0.0298698		1.06929	0.0269688					16.2626								0.206296								2.28787
				609	1.48319	0.0326166		1.39586	0.0293729					7.5208								0.152376								2.10055
				612	1.62404	0.0345406		1.56556	0.0289529					9.75237								0.138495								1.82848
				615	1.7334	0.0354978		1.66879	0.0296441					14.296								0.130363								1.97929
				618	1.80303	0.0363868		1.72969	0.028476					8.664								0.168233								2.23207
				621	1.86608	0.0362609		1.78822	0.0300202					13.6819								0.129922								1.66933
				624	1.89442	0.036267		1.83137	0.0313167					10.473								0.215607								2.58377
				627	1.9226	0.0359392		1.87158	0.0315592					11.4228								0.189556								2.13348
				630	1.94708	0.0358509		1.88982	0.0326126					9.32871								0.209753								2.32457
				633	1.97502	0.036524		1.90378	0.0331472					7.55847								0.120702								1.37412
				636	1.9704	0.035331		1.90447	0.0334368					6.02142								0.135794								1.82719
				639	1.9893	0.0358762		1.91139	0.0333821					10.0816								0.137327								1.69957
				642	1.98485	0.0366315		1.92265	0.0345046					9.8667								0.140384								1.96365
				645	1.98472	0.0358048		1.93201	0.0352102					8.68226								0.103115								1.79053
				648	1.97493	0.0359502		1.93985	0.0366244					8.10096								0.196322								2.38653
				651	2.00328	0.0363606		1.93659	0.0361326					11.078								0.170356								2.18057
				654	1.97916	0.0364719		1.94255	0.0357806					9.21508								0.194863								2.30473
				657	1.99316	0.0355411		1.93419	0.0364349					16.6939								0.138617								1.91954
				660	1.98005	0.0347053		1.93562	0.0370604					16.993								0.176347								2.00386
				663	1.98038	0.0357142		1.93771	0.0360009					11.8723								0.210328								2.56305
				666	1.97927	0.0346052		1.90952	0.0374318					12.9893								0.172331								2.43535
				669	1.97464	0.0354205		1.89451	0.0382297					7.44916								0.167933								2.26387
				672	1.97307	0.0350377		1.88236	0.0366918					7.02057								0.181009								2.11939
				675	1.99688	0.0355992		1.88122	0.0384212					10.551								0.164856								2.17011
				678	1.96648	0.0346405		1.88285	0.0367297					7.89474								0.196033								2.50072
				681	1.97863	0.0343518		1.87745	0.0378585					12.5512								0.223567								2.41614
				684	1.9745	0.0348451		1.87775	0.0387863					8.75357								0.185961								2.39701
				687	1.96807	0.0346885		1.90711	0.0386445					9.88537								0.163051								2.1049
				690	1.98045	0.0353069		1.90085	0.0387746					12.8262								0.152212								1.75017
				693	1.9819	0.0353042		1.88639	0.0379131					10.163								0.149871								1.76159
				696	1.9595	0.0349352		1.89946	0.0377199					10.9563								0.151836								2.33455
				699	1.96733	0.0352304		1.87203	0.0382613					8.08456								0.048458								0.828616
				702	1.9743	0.0354953		1.90556	0.0374048					11.4446								0.162267								2.09944
				705	1.96296	0.0348043		1.9095	0.0390429					11.0702								0.144389								1.74277
				708	1.96566	0.0354842		1.90648	0.0396548					5.65108								0.143296								2.04667
				711	1.95423	0.0354351		1.88806	0.038759					14.1213								0.169078								2.34434
				714	1.96335	0.0340311		1.89412	0.0376871					10.0213								0.147725								1.82451
				717	1.95577	0.035716		1.89565	0.0384877					9.85098								0.120315								1.61343
				720	1.95243	0.0348397		1.89106	0.0400337					8.64821								0.144147								1.88094
				723	1.95718	0.0350713		1.87354	0.0389195					8.41685								0.190835								2.27618
				726	1.94565	0.0351415		1.8759	0.0393025					12.1421								0.196177								2.54303
				729	1.96155	0.0354006		1.901	0.0393481					10.1989								0.103701								2.11019
				732	1.94223	0.0348396		1.88081	0.0402249					7.55033								0.118709								1.53246
				735	1.93828	0.0350593		1.88278	0.0405335					8.06583								0.180567								2.15708
				738	1.91942	0.0354602		1.88017	0.040317					10.1674								0.186027								2.40786
				741	1.92121	0.0352375		1.86938	0.0403017					7.48226								0.137491								1.87793
				744	1.91438	0.0351228		1.87887	0.0403685					7.93355								0.106485								1.6786
				747	1.92106	0.0367087		1.86899	0.0393949					9.34338								0.169196								2.20189
				750	1.90091	0.0361964		1.86075	0.038894					14.9723								0.138464								2.00299
				753	1.9106	0.0356343		1.86139	0.0390025					8.99272								0.193137								2.14098
				756	1.90654	0.0342615		1.86838	0.0401825					5.5463								0.150734								1.99831
				759	1.91656	0.0350046		1.8717	0.039342					4.47351								0.158339								1.90903
				762	1.92072	0.0348625		1.87941	0.0392131					11.2601								0.114723								1.58928
				765	1.89793	0.0346444		1.86077	0.0403885					9.67375								0.1959								2.3318
				768	1.90439	0.0360552		1.8591	0.0394746					15.1498								0.16785								2.29989
				771	1.9176	0.0357296		1.8703	0.0395582					11.4712								0.189486								2.35716
				774	1.914	0.0350573		1.86163	0.0399493					6.34538								0.137034								1.59917
				777	1.90633	0.0348976		1.85978	0.0399697					13.8486								0.183217								2.3512
				780	1.89579	0.035552		1.86165	0.0401412					8.42719								0.150029								2.22134
				783	1.89749	0.0348204		1.86507	0.0401246					8.69685								0.166198								2.14706
				786	1.90094	0.0364686		1.85652	0.0412148					11.675								0.161236								1.85959
				789	1.89891	0.0354873		1.84581	0.0397677					10.356								0.138072								1.71707
				792	1.88612	0.035257		1.83935	0.0392547					8.91306								0.15316								1.90732
				795	1.89321	0.036071		1.84548	0.0402199					9.40347								0.132215								2.14059
				798	1.89419	0.0362499		1.84437	0.0407707
				801	1.8907	0.0366624		1.83151	0.0407964
				804	1.90278	0.0361504		1.84209	0.0398178
				807	1.89443	0.0357183		1.83012	0.0397692
				810	1.903	0.0352121		1.84009	0.0398765
				813	1.90119	0.0361018		1.83394	0.0401088
				816	1.89735	0.0348391		1.85171	0.0407934
				819	1.88074	0.0363788		1.82418	0.0406778
				822	1.87565	0.0369034		1.83687	0.040997
				825	1.87909	0.0349561		1.85563	0.0414712
				828	1.88599	0.0370001		1.82642	0.0412496
				831	1.85366	0.0353185		1.83736	0.0412174
				834	1.86831	0.0354757		1.82105	0.0407826
				837	1.8471	0.0348989		1.82437	0.0403456
				840	1.85323	0.0345063		1.83473	0.0411314
				843	1.8425	0.0361737		1.83398	0.0410474
				846	1.86684	0.0365386		1.81416	0.0407083
				849	1.82843	0.0363818		1.81525	0.0417946
				852	1.84208	0.0364014		1.8012	0.0412727
				855	1.83754	0.0365926		1.82037	0.0417385
				858	1.8337	0.0360077		1.81484	0.0417695
				861	1.8298	0.0351218		1.81244	0.0420026
				864	1.82973	0.0354215		1.80932	0.0430861
				867	1.83218	0.0365436		1.81551	0.0427535
				870	1.81636	0.0363221		1.8136	0.0416196

## Sheet: Fig. 3D
	Figure 3D (trace, far left panel)									Figure 3D (bar-graphs: left, middle and right panels)
	Average Store-operated Ca2+ Entry (SOCE) Trace									Bar-graph summaries
	X-axis: Time (sec), Y-axis: Fluo-4/Fura-Red Ratio; SEM- Std. error of mean									(1) ADP cyt.Ca2+ peak (baseline subtracted), (2) Peak SOCE (baseline subtracted), and (3) SOCE rate
	Time (s)	WT			TREM2 KO					WT-ADP peak (SR)	WT-ADP-SOCE peak	WT-ADP-SOCE rate	KO-ADP peak (SR)	KO_ADP-SOCE peak	KO-ADP-SOCE rate
		Mean	SEM		Mean	SEM				column A	column B	column C	column D	column E	column F
																		Ca2+ Peak 0Ca ADP (baseline sub.)
	0	0.188182	0.00411		0.190495	0.006103				1.66176	0.051135	0.003231	0.407845	0.02337	0			Column D	KO-ADP peak (SR)
	2	0.18827	0.004223		0.191013	0.007341				1.49272	0.008351	0.004758	1.66371	0.508235	0.031435			vs.	vs.
	4	0.189261	0.004181		0.189737	0.00597				1.20756	0.013322	0.001258	1.67026	0.002666	0.004			Column A	WT-ADP peak (SR)
	6	0.189377	0.004102		0.188722	0.005301				1.30397	0.03778	0.005754	1.70007	0.504069	0.050201
	8	0.190249	0.003995		0.18766	0.005014				1.65395	0.225391	0.01913	1.46202	2.17151	0.164123			Mann Whitney test
	10	0.189411	0.0041		0.185663	0.004859				1.21248	0	0.006086	1.39665	1.35034	0.108269			P value	< 0.0001
	12	0.189882	0.004303		0.185158	0.004767				1.03431	0	0.00064	1.87411	0.404106	0.032677			Exact or approximate P value?	Approximate
	14	0.190016	0.004476		0.184376	0.004398				0.806285	0.081811	0	1.29076	0.9592	0.092834			P value summary	****
	16	0.191852	0.00512		0.183128	0.003946				0.746235	0.067199	0.00637	1.50316	1.93281	0.127769			Significantly different? (P < 0.05)	Yes
	18	0.194582	0.00737		0.182355	0.003431				0.844233	0.058574	0.005009	1.46145	0.273952	0.020908			One- or two-tailed P value?	Two-tailed
	20	0.195354	0.009254		0.181337	0.003149				0.970882	0.023877	0.005687	1.43219	0.973402	0.067314			Sum of ranks in column A,D	63088 , 86790
	22	0.195468	0.009396		0.181405	0.003113				0.96637	0	0.006376	1.86778	0	0.002486			Mann-Whitney U	13947
	24	0.193566	0.008142		0.181408	0.003291				1.53761	0.045124	0.006483	1.58012	0.083194	0.007911
	26	0.192746	0.007729		0.181299	0.003562				1.53748	1.03173	0.074084	1.8028	0.03556	0.001666			Difference between medians
	28	0.192646	0.00829		0.180799	0.003728				1.0096	0.039916	0.003616	1.78424	0.360192	0.02184			Median of column A	0.09349
	30	0.193722	0.008591		0.180519	0.003732				1.52108	0.00976	0.004756	1.48138	1.31814	0.095349			Median of column D	1.302
	32	0.19547	0.008772		0.181762	0.003933				0.822819	0.00403	0.004403	1.91278	0	0.002975			Difference: Actual	1.208
	34	0.195372	0.007916		0.185066	0.005236				1.67916	0.183025	0.012415	1.69677	0.368168	0.030537			Difference: Hodges-Lehmann	0.8252
	36	0.193308	0.007057		0.186302	0.006455				1.48539	0.458826	0.04769	1.86635	0.110299	0.015513
	38	0.190193	0.006197		0.185571	0.006755				1.63777	0.779841	0.068306	1.44898	0.045995	0.005861			SOCE Ca2+ Peak 0Ca ADP->1Ca (baseline sub.)
	40	0.18819	0.005418		0.183446	0.005527				2.01616	0.206299	0.023273	1.79145	0.570335	0.040749			Column E	KO_ADP-SOCE peak
	42	0.187538	0.004706		0.183755	0.004803				0.904156	0.025567	0.00383	1.59883	0.061249	0.001997			vs.	vs.
	44	0.186669	0.00434		0.184234	0.004323				0.769611	0.015337	0	1.7118	1.34258	0.080264			Column B	WT-ADP-SOCE peak
	46	0.185019	0.004099		0.182943	0.003713				1.89291	0.726817	0.060987	1.86021	0.293452	0.023885
	48	0.183779	0.004088		0.181682	0.003346				1.00449	0.005682	0.004935	1.83482	0.349203	0.026197			Mann Whitney test
	50	0.183436	0.003968		0.182704	0.00405				1.18244	0.036252	0.005891	1.70854	1.14607	0.118144			P value	< 0.0001
	52	0.183808	0.003985		0.184271	0.004822				0.909569	0.028048	0	1.66172	0.691113	0.042352			Exact or approximate P value?	Approximate
	54	0.184198	0.003985		0.184662	0.004829				1.66351	0.015504	0.006285	1.35257	1.00277	0.062997			P value summary	****
	56	0.183883	0.004032		0.183418	0.003675				1.09093	0.005278	0.001096	1.6584	0.612497	0.037658			Significantly different? (P < 0.05)	Yes
	58	0.184797	0.004022		0.1852	0.005941				1.00114	0.029996	0	1.90513	0.170596	0.011432			One- or two-tailed P value?	Two-tailed
	60	0.18873	0.006247		0.186192	0.007949				1.9361	0.861076	0.068386	1.73429	1.44584	0.089853			Sum of ranks in column B,E	66965 , 82913
	62	0.193025	0.009267		0.186544	0.008545				1.19843	0.076514	0.017735	1.83543	0.895603	0.049021			Mann-Whitney U	17824
	64	0.194878	0.011487		0.183627	0.0057				1.37003	0.106791	0.003882	1.61045	1.14599	0.087992
	66	0.193278	0.010055		0.181674	0.004093				1.06386	0.088363	0.006105	1.39914	1.14121	0.091412			Difference between medians
	68	0.192915	0.009229		0.182171	0.004716				1.27488	0.011848	0.007162	1.48896	0.019652	0.003342			Median of column B	0.03733
	70	0.192692	0.009015		0.183391	0.005945				1.23731	0	0.001639	1.17929	1.05694	0.064644			Median of column E	0.7706
	72	0.191163	0.008461		0.184583	0.006284				1.95517	1.02266	0.075198	1.56747	0.044538	0.004808			Difference: Actual	0.7332
	74	0.189046	0.008125		0.182813	0.005088				1.88067	0.910043	0.058959	1.62531	0.04376	0.00357			Difference: Hodges-Lehmann	0.4326
	76	0.188976	0.007808		0.182082	0.003909				1.1586	1.07639	0.077055	1.75473	0.438433	0.027502
	78	0.189625	0.007612		0.180342	0.003128				0.732214	0.000275	0	1.49906	0.398139	0.018449			SOCE rate 0Ca ADP->1Ca
	80	0.189817	0.007206		0.179913	0.002899				1.74687	0.015237	0.002843	1.40894	0.056446	0.006858			Column F	KO-ADP-SOCE rate
	82	0.189578	0.007254		0.178712	0.002785				1.19075	0.014808	0	1.48779	1.60907	0.133758			vs.	vs.
	84	0.190097	0.007805		0.179288	0.002692				1.59909	0.171563	0.017365	1.89523	0.364173	0.024203			Column C	WT-ADP-SOCE rate
	86	0.189438	0.007569		0.178739	0.002644				1.2296	0.115625	0.014879	1.87698	0.436689	0.030332
	88	0.188483	0.006748		0.178047	0.00261				0.963496	0	0.003939	1.79609	0.124096	0.012071			Mann Whitney test
	90	0.187221	0.00548		0.175813	0.002586				0.867065	0.021435	0.002565	1.57417	0.036974	0.006506			P value	< 0.0001
	92	0.189356	0.00529		0.176	0.002605				1.05036	0.042128	0.004522	1.73896	0.095561	0.006347			Exact or approximate P value?	Approximate
	94	0.192266	0.006749		0.17649	0.002605				1.49175	0.087655	0.010381	1.65664	1.42487	0.102769			P value summary	****
	96	0.192382	0.007726		0.177606	0.002685				1.34616	0.560249	0.040513	1.95372	1.85625	0.146967			Significantly different? (P < 0.05)	Yes
	98	0.189452	0.006319		0.176915	0.002655				1.28617	0.09454	0.012517	1.51869	0.047443	0.009145			One- or two-tailed P value?	Two-tailed
	100	0.187292	0.004633		0.175507	0.002693				0.779228	0.009781	0	1.46424	0.117577	0.007815			Sum of ranks in column C,F	65438 , 84441
	102	0.187019	0.004222		0.174481	0.002725				1.68853	1.27448	0.097635	1.69243	0.77878	0.067016			Mann-Whitney U	16297
	104	0.186165	0.004297		0.174185	0.00276				1.10415	0	0.001107	1.98476	1.89831	0.166599
	106	0.184408	0.004553		0.174829	0.002764				0.856678	0.050672	0	1.69161	1.09131	0.10515			Difference between medians
	108	0.183416	0.005214		0.175108	0.002722				0.039723	0.044172	0.002694	1.7359	0.961807	0.057424			Median of column C	0.001887
	110	0.184907	0.006049		0.175427	0.002678				0.215647	0.050303	0	1.6318	0.851521	0.06661			Median of column F	0.02041
	112	0.185993	0.006397		0.176168	0.002876				0.077691	0.082878	0.000981	1.36349	0.018893	0.003794			Difference: Actual	0.01852
	114	0.185712	0.005817		0.181678	0.005217				0.078317	0.049287	0.006947	1.58615	0.531724	0.033521			Difference: Hodges-Lehmann	0.01103
	116	0.18412	0.005047		0.186794	0.008063				0.060898	0.015471	0.001059	1.77832	0.727852	0.0394
	118	0.182638	0.004363		0.190387	0.009737				0.052387	0.041758	0.004076	1.41213	1.77499	0.139901
	120	0.182786	0.004064		0.188655	0.008224				0.034397	0.040732	0.002368	1.59632	0.780046	0.043386
	122	0.183564	0.004151		0.190507	0.008005				0.175863	0.029968	0.00727	1.4982	1.15603	0.05786
	124	0.203898	0.009017		0.2215	0.013031				0.148628	0	0	1.55469	0.067862	0.008882
	126	0.2576	0.020336		0.364697	0.024469				0.03951	0	0	1.41629	1.51901	0.100041
	128	0.331032	0.032357		0.614833	0.03582				0.038384	0.028216	0	1.64007	0.531786	0.039639
	130	0.391938	0.038411		0.85797	0.042726				0.068023	0.028845	0	1.64598	0.194345	0.020243
	132	0.410174	0.03699		0.979741	0.038578				0.027529	0.031942	0.001329	1.85071	0.176891	0.010368
	134	0.39337	0.032395		0.951465	0.030722				0.080887	0.040745	0.00549	1.47727	0.046179	0.004583
	136	0.352687	0.026121		0.860687	0.026143				0.028556	0.008358	0.000357	1.41867	0.445147	0.028128
	138	0.313067	0.020262		0.729958	0.021887				0.051621	0.016317	0.002466	1.26641	0.043249	0.005253
	140	0.282317	0.016435		0.583213	0.017567				0.139687	0.0084	0	1.37233	1.19791	0.094175
	142	0.26009	0.014926		0.454085	0.013593				0.07308	0.011181	0	1.71796	0.037898	0.006905
	144	0.241425	0.012936		0.34914	0.009541				0.063055	0.046292	0	1.29957	1.48559	0.115362
	146	0.225479	0.011021		0.27601	0.006762				0.816113	0.062522	0.004995	1.4484	0.00558	0.000827
	148	0.215534	0.00939		0.230103	0.004995				0.022997	0.021632	0.003381	1.23762	0.014919	0.001135
	150	0.207875	0.008467		0.201836	0.003903				0.052286	0.045678	0	1.41838	1.29208	0.093887
	152	0.202157	0.00805		0.185633	0.003281				0.030704	0	0	1.37883	0.242653	0.016057
	154	0.198559	0.007669		0.175266	0.002937				0.20229	0.049438	0.003155	1.71437	0.300072	0.023583
	156	0.194465	0.007265		0.16887	0.002838				1.22365	0	0.00356	1.94296	0.500323	0.024861
	158	0.192675	0.006925		0.16491	0.00272				0.650727	0.021616	0.001575	1.88601	1.14294	0.064582
	160	0.189021	0.006551		0.161733	0.002654				0.627348	0.039965	0.003382	1.31373	1.24507	0.078812
	162	0.187436	0.006503		0.160033	0.002604				0.734214	0	0.000497	1.62476	2.29084	0.182577
	164	0.186131	0.006518		0.159651	0.002555				0.648433	0	0.001622	1.68427	0.033802	0.003478
	166	0.184905	0.006876		0.15866	0.002605				1.39471	0.602263	0.046471	1.4409	0.83423	0.057735
	168	0.182315	0.006688		0.157723	0.002818				1.56756	0.081826	0.010404	1.78208	0.059805	0.007417
	170	0.179877	0.00604		0.157313	0.003658				1.57789	0.031983	0.003517	1.37395	0.064753	0.007375
	172	0.179333	0.005301		0.15924	0.004815				0.911726	1.55893	0.138662	1.55661	1.89473	0.141452
	174	0.178027	0.005046		0.160107	0.005097				1.18963	0	0.002608	1.62524	1.47828	0.11931
	176	0.17805	0.005197		0.159082	0.004369				1.36795	0.014711	0.003925	1.42627	2.07525	0.162894
	178	0.176202	0.005412		0.157845	0.003335				0.795499	0.012627	0.001357	1.62165	1.0642	0.071007
	180	0.176766	0.005416		0.157226	0.003097				1.0276	0.009355	0	1.76533	0.036205	0.004982
	182	0.174082	0.004944		0.156644	0.002874				1.55673	0	0.000583	1.4943	0.325807	0.021924
	184	0.17267	0.00455		0.155186	0.002831				1.47901	0.394057	0.035645	1.67902	0.904857	0.07127
	186	0.170213	0.004227		0.1546	0.002593				0.029823	0.020272	0.003914	1.58247	0.086421	0.009018
	188	0.168785	0.004017		0.154654	0.002573				0.04419	0.033353	0.001311	1.09527	0.955245	0.062797
	190	0.168242	0.003918		0.153948	0.002452				0.030986	0	0	1.69539	0.020637	0.006658
	192	0.168616	0.0039		0.153394	0.002487				0.030419	0.015449	0.003691	1.54345	1.55481	0.109931
	194	0.168738	0.003866		0.152985	0.002409				0.037938	0.030288	2.13e-05	1.59949	0.966033	0.07272
	196	0.169028	0.003815		0.153582	0.002463				0.044568	0.008905	0.00251	1.72279	0.044653	0.006204
	198	0.168087	0.003809		0.152899	0.002478				0.036764	0.005693	0.00106	1.59135	0.254234	0.016854
	200	0.167126	0.00379		0.152867	0.002505				0.019798	0.015885	0.000878	1.68004	2.14553	0.192475
	202	0.16543	0.003778		0.152912	0.002471				0.017128	0.011228	0.000547	1.41988	1.53449	0.121165
	204	0.16494	0.003782		0.152937	0.002471				0.033329	0.019422	0.000985	1.53151	1.67847	0.141878
	206	0.164698	0.003683		0.152943	0.00247				0.022769	0.020956	0.000278	1.42184	1.16325	0.073596
	208	0.164777	0.00362		0.153048	0.002436				0.024939	0.016236	0	1.53264	1.13724	0.093885
	210	0.165637	0.003532		0.153612	0.002439				0.013124	0.012926	0	1.53709	0.163865	0.019052
	212	0.167466	0.003574		0.154648	0.002438				0.02458	0.016584	0.001623	1.43926	1.73983	0.118928
	214	0.168371	0.003685		0.154464	0.002474				0.033141	0.015757	0	1.04441	1.17789	0.120454
	216	0.169386	0.003901		0.153721	0.002426				0.083918	0.00734	0.002047	1.24656	0.95262	0.007265
	218	0.168977	0.00423		0.152802	0.002418				0.02295	0	0	0.548244	0.524888	0.000721
	220	0.170365	0.00532		0.152926	0.002427				0.029743	0.026931	9.67e-05	0.833807	0.070504	0.00092
	222	0.170701	0.006055		0.153442	0.00241				0.015908	0.026329	0	0.013611	0.074409	0.001975
	224	0.172291	0.006268		0.15317	0.002444				0.052909	0.033428	0.006124	1.10098	0.955514	0.048715
	226	0.172002	0.005274		0.153134	0.002402				0.041939	0.016241	0.000666	1.27984	0.874675	0.033241
	228	0.171656	0.004605		0.152658	0.002447				0.023235	0.001429	0.000479	0.749104	0.952441	0.00142
	230	0.170471	0.004273		0.151997	0.002412				0.028159	0.009036	0.000486	1.13568	0.976433	0.006245
	232	0.171153	0.004203		0.150725	0.002464				0.006413	0	0.000763	1.34651	0.79552	0.00405
	234	0.172559	0.005112		0.149965	0.002446				0.033936	0.026147	0	0.627383	0.024418	0.002009
	236	0.176504	0.007763		0.149399	0.00242				0.013776	0	0.000277	0.01403	0.010977	0.000894
	238	0.177468	0.009978		0.148236	0.002344				0.078385	0.045811	0	0.019064	0.793748	0.020591
	240	0.177817	0.009669		0.149018	0.00235				0.023684	0.019674	0.001346	1.18623	1.17491	0.097643
	242	0.177782	0.009136		0.150163	0.002342				0.017982	0.015748	0.001084	1.0008	0.903673	0.044194
	244	0.178427	0.009049		0.152663	0.00239				0.028233	0	0.00054	0.018085	0.695402	0.000463
	246	0.17681	0.008462		0.152579	0.002358				0.023556	0.002066	0	1.36977	0.449312	0.020574
	248	0.173941	0.007297		0.151985	0.002328				0.026793	0.01721	8.76e-05	0.863345	1.28934	0.045556
	250	0.172431	0.006254		0.151426	0.002315				0.046316	0.015528	0.001002	1.33796	1.25623	0.095328
	252	0.17145	0.005392		0.151364	0.002325				0.030934	0.005184	0.000527	0.766492	0.075411	0.002521
	254	0.170708	0.004757		0.151213	0.002351				0.061643	0.011782	0.001398	1.33883	0.583159	0.007091
	256	0.169693	0.004293		0.150615	0.002301				0.020332	0.016529	0.000818	0.749775	0.998464	0.066584
	258	0.169212	0.004114		0.150194	0.002367				0.033436	0.015098	0	0.930591	0.844679	0.034619
	260	0.169534	0.004203		0.15063	0.002362				0.0281	0.017728	0.003306	0.819308	0.990905	0.070811
	262	0.169873	0.004375		0.150378	0.002357				0.043523	0.023468	0	0.038954	0.921124	0.003483
	264	0.170349	0.004658		0.149897	0.002291				0.026003	0.002295	0	0.003331	0.745622	0.024998
	266	0.17007	0.004748		0.149034	0.002246				0.038192	0.034751	0.000975	0.967549	0.82316	0.004401
	268	0.170131	0.004764		0.148429	0.002292				0.467131	0.088835	0.004529	0.018152	0.002299	0.001342
	270	0.170522	0.004548		0.147784	0.002243				0.022209	0.01516	0.001303	1.36496	1.10886	0.078932
	272	0.170575	0.004432		0.146754	0.00229				0.008506	0.005303	0.000947	0.017335	0.926902	0.077611
	274	0.169867	0.00434		0.146773	0.002294				0.012356	0.005029	0.000946	0.024928	0.082874	0.004071
	276	0.167994	0.004242		0.147172	0.0023				0.030361	0.035079	0.000758	1.23148	0.879812	0.012189
	278	0.166994	0.00398		0.147665	0.002291				0.027809	0.005329	0.000578	1.4106	0.321496	0.002817
	280	0.16523	0.003802		0.147805	0.002241				0.025435	0.019091	0	0.819158	0.757302	0.005006
	282	0.164813	0.0037		0.148335	0.002276				0.018728	0.022534	0	0.938542	0.0371	0.000755
	284	0.164441	0.003642		0.148811	0.002332				0.014062	0.008446	0	1.17922	0.869425	0.033536
	286	0.165644	0.003602		0.148937	0.002378				0.026247	0.017554	0.002659	1.13464	0.967297	0.037257
	288	0.166945	0.003615		0.147694	0.002331				0.03067	0.016811	0.001772	1.17943	1.33974	0.052182
	290	0.167542	0.003711		0.147103	0.002274				0.026823	0.000375	0.00213	0.771947	0.728239	0.001595
	292	0.168958	0.003817		0.146478	0.002235				0.034288	0.039867	0.000742	1.10878	0.683319	0.015783
	294	0.169286	0.004296		0.147045	0.002283				0.020559	0.016816	0	1.13465	0.568197	0.002654
	296	0.170996	0.005915		0.14602	0.002308				0.033643	0.038435	0.001793	1.05923	0.734444	0.004403
	298	0.170508	0.00709		0.146084	0.002307				0.072388	0.004402	0	1.26357	0.94885	0.052243
	300	0.17074	0.00723		0.146888	0.002264				0.041156	0.023935	0	1.0035	0.935774	0.049493
	302	0.172233	0.006736		0.14781	0.002287				0.029929	0.012159	0	1.43506	1.04457	0.053875
	304	0.174251	0.007048		0.147559	0.00228				0.02446	0.003685	0.001207	1.04987	1.06022	0.005224
	306	0.175595	0.007132		0.146612	0.002262				0.024382	0.01864	0	0.939917	0.06348	0.000385
	308	0.172824	0.005924		0.146522	0.002213				0.017253	0	0.000889	0.033021	0.09583	0.002994
	310	0.170271	0.00517		0.146439	0.002265				0.032173	0.012884	0.001887	1.17907	1.07408	0.048828
	312	0.168549	0.004349		0.145819	0.002281				0.026213	0	0.002877	1.38992	0.484675	0.00078
	314	0.16688	0.003888		0.145531	0.002269				0.041095	0.009369	0	0.830685	1.29049	0.018439
	316	0.165945	0.003714		0.146076	0.002218				0.019088	0.015932	0.000998	1.30385	0.996918	0.032573
	318	0.165732	0.003673		0.146709	0.002224				0.039861	0.020518	0	0.979616	0.208157	0.004662
	320	0.166435	0.003599		0.147325	0.00229				0.015479	0.023766	0.001817	0.881359	0.017877	0.001248
	322	0.166351	0.003574		0.14732	0.002342				0.199382	0.085334	0.003857	0.665561	0.862318	0.075393
	324	0.165403	0.003619		0.145918	0.002324				0.035441	0.018994	0.001491	1.34221	0.572809	0.002595
	326	0.163941	0.003641		0.145966	0.002294				0.050813	0.031078	0	0.908641	0.879622	0.002629
	328	0.163071	0.003697		0.145093	0.002247				0.045687	0.077186	0.004431	1.01903	0.040138	0.001053
	330	0.162492	0.003614		0.146685	0.002234				0.023814	0.037334	0.001599	1.15782	0.976075	0.066052
	332	0.163605	0.003604		0.146862	0.00225				0.079905	0.046946	0	0.978844	0.979692	0.004123
	334	0.163178	0.00351		0.147488	0.002268				0.037932	0.043835	0.002143	1.16314	0.762342	0.007639
	336	0.162913	0.00352		0.147142	0.002274				0.050211	0.016517	0.002024	1.23877	0.058989	0.00175
	338	0.161865	0.003488		0.147267	0.002272				0.412473	0.075861	0.003034	1.13837	1.01316	0.039902
	340	0.162873	0.00359		0.147348	0.002297				0.581549	1.14818	0.089459	1.25082	0.430634	0.016149
	342	0.163858	0.003648		0.147652	0.002346				1.56254	0.831376	0.053342	1.20621	1.1009	0.001426
	344	0.162878	0.003665		0.146777	0.002358				1.18041	1.49855	0.136207	0.952264	0.003399	0.002053
	346	0.162868	0.003612		0.146852	0.0023				1.65839	1.98098	0.16609	0.148995	0.210505	0.001834
	348	0.163444	0.003503		0.147175	0.002298				1.25458	0.599111	0.044965	1.03094	0.011679	0.002367
	350	0.164663	0.003482		0.147872	0.002239				0.846183	0.031353	0	0.926419	1.23064	0.07437
	352	0.165453	0.003488		0.147155	0.002206				1.25846	1.55322	0.128173	1.10101	0.572702	0.003451
	354	0.163669	0.003578		0.146496	0.00222				1.67227	0.845895	0.066491	1.29872	0.979087	0.005175
	356	0.165687	0.003532		0.147521	0.002466				1.24084	1.20235	0.100507	1.41658	0.978173	0.05709
	358	0.169077	0.003708		0.150161	0.0047				1.11428	0.108789	0.008259	1.19205	0.040925	0.002523
	360	0.177651	0.004976		0.157027	0.006703				1.59119	0.553239	0.054118	0.902501	0.871392	0.001452
	362	0.185179	0.007131		0.16712	0.00719				1.12097	0.771476	0.06536	0.726172	0.22565	0.00162
	364	0.193788	0.009125		0.190195	0.008037				1.54278	0.845909	0.055339	1.31205	1.00908	0.061279
	366	0.199242	0.009724		0.21842	0.011905				1.52404	0.976072	0.079025	1.23132	1.11694	0.104711
	368	0.212581	0.010786		0.249031	0.016581				1.07936	0.016434	0.001815	1.02677	1.28167	0.100759
	370	0.24834	0.015903		0.276712	0.02035				1.92701	1.54639	0.14535	0.763993	0.677253	0.002502
	372	0.307623	0.025035		0.320904	0.02454				1.8875	0.09495	0.004945	1.0838	0.049189	0.002989
	374	0.37391	0.034138		0.382792	0.029423				1.63317	1.73844	0.166776	0.572235	0.019342	0.003701
	376	0.438316	0.038421		0.474694	0.034977				1.82608	0.024571	0.004196	1.45121	0.883828	0.009664
	378	0.489609	0.040594		0.56923	0.038359				1.46299	0.539245	0.042126	0.934535	0.011384	0
	380	0.533096	0.042767		0.664019	0.039913				0.723702	0.931452	0.021404	1.01033	0.607613	0.002089
	382	0.545029	0.042035		0.733575	0.039118				0.005986	0.827972	0.00215	0.951506	0.697612	0.004729
	384	0.541541	0.040342		0.780333	0.037335				0.16877	0.007574	9.51e-05	0.805158	1.25717	0.090683
	386	0.538287	0.038036		0.810253	0.035424				0.01605	0.036625	0.000903	0.958471	0.74461	0.006231
	388	0.532531	0.036287		0.832004	0.033642				0.019323	0.508307	0.022282	1.09192	1.02912	0.010454
	390	0.526732	0.035197		0.848829	0.031436				0.009668	0.01885	0.001565	0.94068	0.914121	0.005212
	392	0.506665	0.032718		0.851524	0.029203				0.003898	1.00669	0.002067	0.973523	0.916352	0.006085
	394	0.480232	0.031129		0.843483	0.027951				0.005926	0.006433	0	1.19165	0.949251	0.013276
	396	0.449028	0.029056		0.828026	0.026704				1.3207	0.021692	0.003502	0.843591	1.02488	0.05393
	398	0.418597	0.026991		0.804885	0.024955				0.000913	0.816632	0.001206	1.43638	0.785773	0.013603
	400	0.389374	0.024956		0.773586	0.024011				0.09237	0.958515	0.000735	1.50458	0.983941	0.02468
	402	0.364084	0.023445		0.738881	0.023349				0.017694	0.192181	0.001092	1.23911	1.03889	0.09268
	404	0.341004	0.022242		0.706742	0.023259				0.015883	0.665666	0.000994	1.07365	1.27841	0.063265
	406	0.323086	0.021683		0.674659	0.022746				0.019065	0.01172	0.000376	0.822903	0.026918	0.001678
	408	0.3071	0.02095		0.639021	0.022346				0.009393	0.033988	0.000422	0.750104	0.719509	0.000994
	410	0.29423	0.02048		0.600265	0.022062				0.006345	0.023362	0.00094	1.12448	0.686845	0.01773
	412	0.283153	0.020183		0.5656	0.021938				0.010815	0.032215	0	1.11045	1.01789	0.085563
	414	0.275811	0.020241		0.539285	0.022153				1.05334	1.10486	0.001014	1.21819	0.896104	0.00134
	416	0.270508	0.020396		0.516729	0.022244				0.453111	0.626627	0.053013	1.14357	1.0722	0.06743
	418	0.266776	0.020282		0.495546	0.022216				0.010195	0.023309	0.00104	0.853341	0.095569	0.000987
	420	0.263248	0.019849		0.477179	0.02224				0.630538	0.667821	0.00816	0.012238	0.054484	0.000409
	422	0.259251	0.019627		0.461799	0.022431				0.093491	0.030766	0.000845	1.34082	0.960946	0.073396
										0.018462	0.115865	0.003297	1.27654	1.23398	0.080321
										0.455792	0.386131	0.047295	1.45447	0.793403	0.036419
										0	0	0.0008	1.1272	1.06701	0.024027
										0.723112	0.299894	0	0.778082	1.10564	0.050238
										0.006035	0.520184	0.0019	1.06499	0.01692	0.000365
										0.015241	0.188627	0.000887	0.954965	0.935329	0.006558
										0.205652	0.060369	0.000785	0.305845	0.648509	0.004464
										0.036526	0.043058	0.000837	0.920605	0.606382	0.00174
										0	0.546062	0.001699	1.02317	1.09166	0.067533
										0	0.476736	0.003159	1.26124	0.989395	0.052242
										0.033533	0.030694	0.00151	1.18642	0.688084	0.007565
										0.329154	0.0711	0.001784	0.946736	0.849231	0.003478
										0.065641	1.01181	0.002034	1.14765	0.564617	0.001253
										0.010796	0.008432	0.000112	1.01992	0.746609	0.023283
										0.036583	1.28574	0.025517	0.962079	0.982602	0.026848
										1.4528	0.164578	0.002549	0.852138	0.030034	0.001696
										0.006759	0.110234	0.006222	0.379678	0.75464	0.004467
										0.01076	1.01984	0.001686	0.811744	0.004238	0.001538
										0.014662	0.018705	0.000599	1.23651	0.54839	0.001807
										1.05983	-0.01465	0.000506	0.770765	1.05544	0.00182
										0.818081	0.012167	0.000922	0.882449	1.1601	0.090037
										0.654637	0.006998	0.000789	0.905156	1.19121	0.106662
										0.019252	0.029479	0.000472
										0.023308	0.176545	0.001953
										0.021654	0.158003	0
										0.032539	0.851439	0.012777
										0.015967	0.670913	0
										0.852678	0	0.001598
										0.011672	0.252453	0.001954
										0.016434	0.016327	0.000693
										0.00621	0.007595	0.000627
										0.01303	0.914427	0.001548
										0.004054	0.899788	0.003117
										0.933164	0.794706	0.000563
										0.738898	0.129075	0.002335
										0.925535	0.981884	0.003954
										1.08884	1.07827	0.003237
										0.763416	1.01915	0.009124
										0.014916	1.05866	0.002884
										0.869727	1.23408	0.00441
										0.00273	1.37499	0.002174
										0.874183	0.810291	0.001494
										0.732401	1.04075	0.001512
										0.887907	0.629535	0.000946
										0.005295	0.804826	0.002191
										0.003646	0.000595	0
										0.013987	0.041027	0.006231
										0.013074	0.005523	0.000339
										0.032445	0.028808	0
										0.011699	0.023981	0.002523
										1.19295	0.021642	0.000522
										1.07647	0.622224	0.001777
										0.010503	0.081699	9.81e-05
										0.921227	0.067661	0.007815
										0.928845	0.032953	0.003179
										0.34337	0.665146	0.051084
										0.004949	0.005396	0.001118
										0.731481	0.601271	0.004731
										0.181264	0.043971	0.002428
										0.009099	0.014042	0
										0.034909	0.805869	0.001934
										1.28054	0.770274	0.015488
										0.030822	0.041127	0.003349
										0.004864	1.19995	0.001673
										0.362779	0.050009	0.002731
										0.006776	0.600832	0
										0.023464	0.590909	0.007934
										0.953467	0.003293	0.000908
										0.004977	0.001721	0
										0.850174	0.014707	0.001306
										0.592978	0	0.000741
										0.019879	0.469382	0.006635
										0.713103	0.967978	0.002877
										0.628804	0.003589	0.001039
										0.00027	1.18229	0.009569
										0.986176	1.04787	0.004121
										0.019259	0.344296	0.000466
										0.929767	1.12859	0.022785
										0.765791	0.877128	0.003069
										0.946057	0.776663	0.032439
										1.02685	1.35146	0.095822
										0.995348	0.696398	0.003252
										0.970892	1.2053	0.07374
										0.978985	0.012513	0.00272
										0.004017	0.001634	0
										0.73433	1.0752	0.00258
										0.921103	0.115966	0.004142
										0.629302	0.733881	0.023914
										0.126363	0.981515	0.003271
										1.2427	1.02899	0.003883
										0.001112	1.42251	0.090762
										0.826689	1.26804	0.076772
										0.26633	0.786177	0.001902
										0.019368	1.09467	0.001584
										0.85446	1.19049	0.005725
										0.037869	1.18732	0.045899
										0.672769	0.054247	0.001867
										0.992738	0.003418	0.00193
										0.784677	1.06768	0.051025
										0.008114	0.665162	0.001011
										0.985849	0.727986	0.01896

## Sheet: Fig. 3E
				Figure 3E (left panel)									Figure 3E (middle panel)									Figure 3E (right panel)
			Average trace: Ionomycin pulse experiment (1Ca->0Ca->0Ca ADP->0Ca Ionomycin)										Bar-graph summary									Bar-graph summary
			Imaging started after switching from 1mM to 0mM Ca2+										ADP cyt.Ca2+ peak (baseline subtracted)									Ionomycin cyt.Ca2+ peak (baseline subtracted)
			X-axis: Time (sec), Y-axis: G/R Ratio (Salsa6f); SEM: std.error of mean
				WT			TREM2 KO						WT	TREM2 KO								WT	TREM2 KO
			Time (s)	Mean	SEM		Mean	SEM					column A	column B								column A	column B
		0mM Ca2+	0	0.128564	0.003175		0.128588	0.00214					1.285	1.28603			Mann Whitney test					0.191	0.927034			Mann Whitney test
			2	0.127863	0.003137		0.127837	0.002138					1.09048	1.40762			P value	0.0216				1.29448	0.375621			P value	< 0.0001
			4	0.127497	0.003092		0.127931	0.002115					0.706069	1.12176			Exact or approximate P value?	Exact				1.06707	0.120759			Exact or approximate P value?	Exact
			6	0.127064	0.003109		0.126703	0.002061					1.12248	1.1351			P value summary	*				0.404483	1.0741			P value summary	****
			8	0.125983	0.00304		0.12613	0.002082					1.09496	1.25386			Significantly different? (P < 0.05)	Yes				0.178965	0.0908621			Significantly different? (P < 0.05)	Yes
			10	0.125377	0.002971		0.12564	0.002112					1.654	1.07238			One- or two-tailed P value?	Two-tailed				1.396	0.168379			One- or two-tailed P value?	Two-tailed
			12	0.125627	0.002981		0.125467	0.002041					0.992241	0.85369			Sum of ranks in column A,B	1324 , 3141				0.304241	0.45869			Sum of ranks in column A,B	2121 , 2344
			14	0.125037	0.002955		0.124926	0.001987					1.29021	1.08231			Mann-Whitney U	729				0.480207	0.26531			Mann-Whitney U	514
			16	0.12394	0.002862		0.124777	0.001995					1.43176	1.06628								0.380759	0.685276
			18	0.123403	0.002919		0.123995	0.001972					1.22417	0.387483			Difference between medians					0.459172	0.405483			Difference between medians
			20	0.123167	0.002876		0.123579	0.001964					1.25341	0.762517			Median of column A	0.8876				1.32241	0.220517			Median of column A	1.046
			22	0.122116	0.002802		0.123309	0.001963					1.20417	0.967069			Median of column B	1.112				0.447172	0.779069			Median of column B	0.3769
			24	0.121802	0.002851		0.122947	0.001935					1.31414	1.02435			Difference: Actual	0.2243				1.39014	0.784345			Difference: Actual	-0.6687
			26	0.121856	0.00282		0.12274	0.002					0.817172	0.875207			Difference: Hodges-Lehmann	0.1992				0.982172	0.378207			Difference: Hodges-Lehmann	-0.416
			28	0.121954	0.002831		0.123089	0.002014					1.17128	1.03386								1.18228	0.233862
			30	0.121316	0.002805		0.122124	0.001971					1.21179	1.0809								0.830793	0.669897
			32	0.120991	0.00281		0.121364	0.001956					0.0186552	1.19124								1.10465	0.167241
			34	0.120915	0.002846		0.121129	0.00195					0.000655172	1.14538								1.35465	0.280379
			36	0.120966	0.002806		0.121064	0.001941					0.419276	0.840552								1.10828	0.203552
			38	0.12092	0.002811		0.121021	0.00197					1.11483	0.866483								1.24683	0.0554828
			40	0.120259	0.002814		0.120713	0.002					-0.00313793	0.187793								1.12886	0.0867931
			42	0.119441	0.002763		0.120848	0.001952					1.25469	1.16938								0.65869	0.561379
			44	0.11987	0.002783		0.120537	0.001946					0.0047931	0.930759								1.15379	0.167759
			46	0.119872	0.002784		0.120225	0.001945					0.637483	0.975414								1.22548	0.893414
			48	0.119793	0.002761		0.120108	0.001996					0.051931	1.015								1.01093	0.329
		0mM Ca2+ 200nM ADP	50	0.119585	0.002843		0.119983	0.002013					0.360069	1.19172								1.23207	0.200724
			52	0.119321	0.002778		0.119997	0.002025					0.895207	1.11638								0.256207	0.136379
			54	0.119365	0.002761		0.119703	0.001998					0.879897	1.17897								0.162897	0.593966
			56	0.118609	0.002776		0.119072	0.00197					-0.00262069	1.19797								1.11438	0.627965
			58	0.118783	0.002796		0.118819	0.00194					0.691207	1.26993								0.0812069	0.569931
			60	0.119438	0.00275		0.119459	0.002061					0.759931	0.984483								0.575931	0.167483
			62	0.119687	0.002868		0.119312	0.002122					0.00448276	1.211								1.31848	0.25
			64	0.328244	0.078881		0.297126	0.056959					0.357517	1.41283								1.12352	0.958828
			66	0.558312	0.101143		0.586947	0.077003					0.519104	0.0323793								1.0241	1.53538
			68	0.679799	0.096189		0.948578	0.063209						1.6279									0.584897
			70	0.682634	0.081985		0.936382	0.042318						1.10738									0.148379
			72	0.600492	0.067657		0.843476	0.033955						0.732035									0.631035
			74	0.508698	0.057926		0.725086	0.031403						0.984414									0.193414
			76	0.421825	0.049757		0.624248	0.029289						1.07235									0.681345
			78	0.411003	0.048696		0.532389	0.024033						1.28807									0.442069
			80	0.361164	0.040953		0.464528	0.021838						1.21928									0.240276
			82	0.345227	0.03717		0.405152	0.019123						0.704035									0.981035
			84	0.295962	0.032403		0.347836	0.015405						1.25779									0.656793
			86	0.277647	0.031774		0.305254	0.014171						1.08376									0.250759
			88	0.283441	0.035558		0.276969	0.011525						1.16607									0.082069
			90	0.242848	0.028052		0.259704	0.012372						1.22897									0.322966
			92	0.223133	0.026065		0.228031	0.008424						1.08914									0.225138
			94	0.201045	0.021725		0.20782	0.009364						1.49214									0.490138
			96	0.193671	0.022733		0.192218	0.007684						0.995759									1.06276
			98	0.177191	0.020278		0.17496	0.005502						1.2101									0.0871034
			100	0.166766	0.01785		0.162969	0.004796						1.36879									1.27479
			102	0.164362	0.018148		0.150638	0.003757						1.01021									0.167207
			104	0.155759	0.017913		0.142425	0.003188						1.21531									0.0863103
			106	0.143562	0.012557		0.134007	0.002773						1.02328									0.806276
			108	0.14075	0.012127		0.128575	0.002601						1.4439									0.689897
			110	0.138548	0.011607		0.125055	0.002483						1.65348									1.51348
			112	0.129993	0.007923		0.122379	0.002325						0.0196207									0.659621
			114	0.124605	0.005952		0.120043	0.002288						1.413									0.119
			116	0.137503	0.016485		0.118143	0.002189						1.14586									0.185862
			118	0.12843	0.007859		0.116349	0.002121						1.26928									0.733276
			120	0.130264	0.01076		0.115236	0.002028
			122	0.122275	0.005377		0.114884	0.002018
			124	0.120052	0.004309		0.113764	0.00202
			126	0.121548	0.005459		0.113529	0.002029
			128	0.120932	0.006491		0.113077	0.001979
			130	0.118408	0.004726		0.113102	0.001953
			132	0.115824	0.003221		0.113635	0.001942
			134	0.118711	0.004654		0.113698	0.001981
			136	0.123981	0.010594		0.113844	0.001967
			138	0.119612	0.005858		0.114437	0.001962
			140	0.127023	0.010584		0.114443	0.001964
			142	0.12542	0.00934		0.114639	0.001997
			144	0.126	0.010923		0.114777	0.002013
			146	0.122878	0.008106		0.114866	0.001983
			148	0.117428	0.003847		0.114998	0.001946
			150	0.115887	0.003221		0.115525	0.00194
			152	0.116454	0.0033		0.11564	0.001953
			154	0.115742	0.003119		0.115735	0.00193
			156	0.114641	0.002968		0.11548	0.001942
			158	0.114844	0.00295		0.116781	0.001971
			160	0.114974	0.002959		0.11667	0.001977
			162	0.114952	0.002981		0.116557	0.001952
			164	0.114633	0.002965		0.116923	0.001923
			166	0.114903	0.002965		0.11735	0.00194
			168	0.114824	0.003047		0.117875	0.00196
		0mM Ca2+ 1mM Ionomycin	170	0.114719	0.002977		0.11749	0.001931
			172	0.114899	0.002994		0.117616	0.001911
			174	0.114667	0.002999		0.117843	0.001955
			176	0.115322	0.003049		0.11878	0.001925
			178	0.115763	0.003065		0.118268	0.001979
			180	0.121065	0.003808		0.122271	0.003745
			182	0.636294	0.091795		0.233187	0.03376
			184	0.907582	0.084666		0.446007	0.049632
			186	0.945075	0.077412		0.542916	0.050723
			188	0.921589	0.071572		0.56539	0.047317
			190	0.866069	0.06595		0.554542	0.042867
			192	0.798926	0.060651		0.532383	0.038527
			194	0.72502	0.055108		0.500876	0.03451
			196	0.652036	0.049098		0.465925	0.030795
			198	0.582515	0.042867		0.436134	0.028185
			200	0.515895	0.036813		0.412448	0.026297
			202	0.459878	0.032026		0.384366	0.02465
			204	0.411589	0.027721		0.359844	0.022973
			206	0.370462	0.024395		0.339384	0.021468
			208	0.335702	0.021908		0.322964	0.020028
			210	0.307717	0.019238		0.304429	0.017955
			212	0.285334	0.017542		0.289458	0.016228
			214	0.265213	0.015996		0.275538	0.014325
			216	0.247663	0.014436		0.261158	0.012357
			218	0.230594	0.012473		0.24835	0.010384
			220	0.217504	0.010991		0.238029	0.008802
			222	0.206135	0.009703		0.227241	0.007443
			224	0.196486	0.008703		0.21644	0.006221
			226	0.187454	0.007486		0.208235	0.005427
			228	0.178914	0.006799		0.201269	0.004929
			230	0.17184	0.006132		0.19405	0.004457
			232	0.164978	0.005444		0.187832	0.004266
			234	0.159527	0.005106		0.182756	0.003981
			236	0.155173	0.004731		0.177497	0.00383
			238	0.150743	0.00448		0.172002	0.00372
			240	0.146086	0.004175		0.167013	0.003574
			242	0.142957	0.003998		0.163866	0.003504
			244	0.140489	0.003894		0.159982	0.003359
			246	0.137612	0.003764		0.156804	0.003292
			248	0.134532	0.003545		0.153894	0.00322
			250	0.132691	0.003525		0.151342	0.003143
			252	0.131056	0.003473		0.148753	0.003055
			254	0.129391	0.003402		0.146695	0.002943
			256	0.127576	0.00334		0.144076	0.002863
			258	0.126221	0.003248		0.142604	0.002812
			260	0.125578	0.003225		0.140309	0.002731
			262	0.123647	0.003139		0.138723	0.002678
			264	0.122641	0.003198		0.137799	0.002657
			266	0.121556	0.003101		0.136669	0.00263
			268	0.121082	0.003117		0.136001	0.002603
			270	0.120727	0.003121		0.134376	0.002602
			272	0.119863	0.003074		0.133882	0.002593
			274	0.118767	0.003034		0.133332	0.002576
			276	0.1185	0.003135		0.132442	0.002568
			278	0.118271	0.003058		0.132057	0.002547
			280	0.117671	0.003082		0.130721	0.00251
			282	0.117322	0.003087		0.130787	0.002524
			284	0.117146	0.003061		0.130566	0.002471
			286	0.117118	0.003084		0.129995	0.002501
			288	0.116137	0.003069		0.129192	0.002525
			290	0.116346	0.003107		0.129368	0.002502
			292	0.116343	0.003101		0.129373	0.0025
			294	0.116515	0.003122		0.12827	0.002453
			296	0.116307	0.003105		0.127864	0.002476
			298	0.116243	0.003098		0.128491	0.00253
			300	0.11574	0.003136		0.128601	0.002519
			302	0.116549	0.003151		0.127944	0.002503
			304	0.116337	0.003091		0.1282	0.002584
			306	0.116484	0.003131		0.127507	0.002556
			308	0.115812	0.003159		0.128032	0.002604
			310	0.116106	0.003158		0.128641	0.002714

## Sheet: Fig. 3F
				Figure 3F (left panel)									Figure 3F (right panel)
				Average Store-release Trace with 2mM Ionomycin									Inonomycin-induced store-release (AUC/min.)
			X-axis: Time (sec), Y-axis: Fluo-4/Fura-Red Ratio; SEM: std.error of mean										Each data point represents a single cell
			Time (sec)		WT			TREM2 KO						WT	TREM2 KO
					Mean	SEM		Mean	SEM					column A	column B
	cells in 0mM Ca2+		0		0.137874	0.0026033		0.172474	0.0354142					18.4893	15.9639			Mann Whitney test
			5		0.134868	0.00243775		0.169501	0.0367346					18.7419	15.4939			P value	0.3413
			10		0.132996	0.00220577		0.166565	0.0346339					14.6911	12.411			Exact or approximate P value?	Approximate
			15		0.133621	0.00242029		0.175522	0.0354263					12.7282	20.4881			P value summary	ns
			20		0.131525	0.00220728		0.171379	0.032785					17.1165	15.0321			Significantly different? (P < 0.05)	No
			25		0.133228	0.00222813		0.171053	0.0329303					28.1124	22.141			One- or two-tailed P value?	Two-tailed
			30		0.132177	0.00220864		0.171884	0.0362502					17.0834	17.2853			Sum of ranks in column A,B	61688 , 41143
			35		0.136538	0.002607		0.169493	0.037825					14.4589	16.0036			Mann-Whitney U	23565
			40		0.134176	0.00233668		0.172557	0.0301199					11.9387	11.6949
			45		0.133322	0.00253484		0.172172	0.0323387					15.7907	11.3071			Difference between medians
			50		0.139323	0.00560443		0.171087	0.0307307					13.9314	14.2543			Median of column A	11.03
			55		0.138977	0.00475931		0.17177	0.0326251					13.4979	15.6414			Median of column B	10.73
			60		0.137096	0.00351403		0.168615	0.0361687					13.9439	11.855			Difference: Actual	-0.3012
			65		0.136129	0.00280635		0.168434	0.0321438					21.0325	19.5195			Difference: Hodges-Lehmann	-0.3064
			70		0.135478	0.00263291		0.16679	0.030235					13.0185	23.2486
			75		0.137607	0.00230021		0.166497	0.0328656					15.4298	13.6662
			80		0.136469	0.00239403		0.166683	0.0332475					14.0573	18.6359
			85		0.135513	0.00223737		0.163012	0.0319204					14.094	18.937
			90		0.139398	0.00241928		0.160664	0.0314807					12.8952	19.0006
			95		0.136273	0.00258711		0.162342	0.0296223					16.7399	14.772
			100		0.140237	0.00564218		0.158431	0.0298051					17.0717	17.5749
			105		0.139388	0.00488234		0.164263	0.0329318					12.3406	19.1844
			110		0.139871	0.00427706		0.166549	0.0283373					22.5235	17.9565
			115		0.138393	0.00284974		0.162023	0.0307476					19.9833	15.4542
			120		0.133652	0.00224452		0.161666	0.0263824					17.3007	14.8214
			125		0.13584	0.0024476		0.162681	0.0290268					12.1733	13.0492
			130		0.137983	0.00262331		0.162312	0.0333306					11.4333	16.892
			135		0.136201	0.00268631		0.15926	0.03073					12.0832	19.2244
	0Ca2+ 2mM Ionomycin		140		0.1378	0.00528651		0.158641	0.0289425					18.9748	19.1486
			145		0.140746	0.00553174		0.155312	0.0286988					18.539	19.6116
			150		0.137619	0.00373807		0.156949	0.0271508					15.9156	11.0502
			155		0.472662	0.00954538		0.566992	0.129758					13.8426	12.5879
			160		1.82295	0.0190223		1.70365	0.189843					15.4417	16.8415
			165		1.80589	0.0213909		1.7082	0.221987					19.5706	17.1165
			170		1.60323	0.0268145		1.56951	0.253706					9.73008	14.5648
			175		1.34686	0.0296197		1.36536	0.278447					13.355	13.9533
			180		1.11083	0.0297306		1.15245	0.267386					22.5209	18.177
			185		0.918205	0.0283226		0.978998	0.232421					18.9686	13.026
			190		0.749706	0.0243993		0.826035	0.193837					15.4867	10.7347
			195		0.62803	0.0208891		0.710167	0.15463					23.1715	13.4672
			200		0.533083	0.0182179		0.62261	0.136225					13.9264	21.601
			205		0.459878	0.0157582		0.558225	0.12151					17.6408	13.4122
			210		0.400339	0.013491		0.492507	0.10819					16.8494	16.0063
			215		0.352875	0.0120548		0.444701	0.0911898					11.9671	14.7018
			220		0.31306	0.0104597		0.39667	0.0861165					18.3747	13.4676
			225		0.285271	0.00949186		0.357783	0.0844301					13.592	13.4583
			230		0.25267	0.00842928		0.325939	0.073844					10.3127	19.5874
			235		0.231428	0.00783941		0.294383	0.0715439					12.0163	16.2522
			240		0.214739	0.00725777		0.269492	0.0722125					11.3942	16.0764
			245		0.19733	0.00662245		0.248327	0.0629574					16.6968	16.9874
			250		0.186132	0.00596684		0.230045	0.0605624					10.2028	15.6481
			255		0.172222	0.0053678		0.212158	0.0574095					9.85897	16.4145
			260		0.165821	0.0052323		0.19615	0.0558264					10.4575	17.0422
			265		0.159263	0.00520975		0.182838	0.0498082					13.1149	16.1525
			270		0.148486	0.00459917		0.169246	0.0435234					17.2102	15.2727
			275		0.14429	0.00430036		0.15749	0.0426138					20.2242	16.156
			280		0.140084	0.00417077		0.156534	0.0426002					13.9022	13.7676
			285		0.133435	0.00376885		0.14856	0.0399161					13.2249	13.0385
			290		0.130848	0.00363715		0.136727	0.0376523					26.9821	10.8525
			295		0.128818	0.00356981		0.127319	0.0379467					13.2479	20.1741
			300		0.125734	0.00360537		0.125012	0.0351716					9.53563	19.2487
			305		0.123306	0.0033755		0.1212	0.031821					16.813	13.0712
			310		0.119388	0.00310766		0.116473	0.0320393					12.685	15.7708
			315		0.116077	0.00304828		0.11173	0.0290223					15.0403	14.4383
			320		0.115248	0.00274097		0.11086	0.0271015					14.49	11.6976
			325		0.113873	0.00276756		0.10076	0.0286092					18.5812	10.2973
			330		0.113774	0.00282881		0.102196	0.0288022					11.1407	13.0353
			335		0.114125	0.00266212		0.0960685	0.0256933					17.3195	16.9722
			340		0.111808	0.00264611		0.0968495	0.0255909					15.2195	12.5706
			345		0.11275	0.00254481		0.0929384	0.0284865					9.16704	12.0559
			350		0.11111	0.00260571		0.0907747	0.0249724					15.6912	13.0433
			355		0.109401	0.00240433		0.0916076	0.0232596					13.8392	13.4576
			360		0.108459	0.00238262		0.0877217	0.0246888					10.2061	17.6575
			365		0.110051	0.00229722		0.0882654	0.0234891					18.3575	12.0759
			370		0.108612	0.00220093		0.0845219	0.0213479					18.6116	9.39846
			375		0.106101	0.00229199		0.0839835	0.0229766					11.7063	14.6574
			380		0.107203	0.00212466		0.0818293	0.0214252					11.7859	12.097
			385		0.10602	0.00216526		0.0842205	0.0222947					15.4933	11.0437
			390		0.106171	0.00200372		0.0821499	0.0209116					31.4443	14.2202
			395		0.105769	0.00195444		0.0809127	0.0212558					20.4425	11.8821
			400		0.105895	0.00197472		0.0804892	0.022159					11.6403	9.91161
														12.6037	13.1782
														9.42053	16.201
														10.862	14.2738
														15.1435	12.7098
														17.3764	14.0227
														13.6252	13.8
														16.7027	12.6237
														11.4552	11.8687
														16.2686	16.3637
														23.0533	15.1337
														11.3743	10.949
														10.6962	13.0382
														15.6571	9.9169
														14.3602	8.57209
														18.6344	13.7728
														11.731	16.4974
														15.0632	11.8984
														15.5456	11.2513
														10.8205	13.4571
														12.2914	10.6363
														12.0184	13.4706
														16.7465	10.9495
														10.1389	11.0503
														13.0456	16.5415
														17.0999	12.9324
														15.8883	14.7007
														13.6877	12.0613
														15.9955	11.4868
														12.1781	16.3048
														15.2609	15.7857
														16.9073	9.65983
														13.5102	12.5781
														11.559	14.011
														10.3125	9.0543
														13.0988	13.2176
														8.03896	12.5131
														12.4208	6.5016
														13.5668	11.628
														14.3164	8.99898
														9.73267	10.6847
														11.4151	14.1449
														11.9651	13.0539
														12.2092	16.9388
														15.6835	10.7676
														9.64898	12.9611
														13.5685	9.3799
														15.1271	11.3764
														11.0406	11.6395
														13.5409	13.9971
														14.5126	12.8125
														8.32734	14.0604
														12.2288	13.4945
														9.47856	7.764
														9.2805	11.622
														13.4897	11.8946
														17.3894	11.0598
														8.82424	13.6311
														11.3751	12.3109
														10.7988	10.5455
														13.1275	13.7644
														13.5718	13.3919
														22.2054	15.59
														18.1585	12.3691
														13.9742	12.0436
														16.6473	12.3813
														12.584
														14.4524
														17.2413
														8.64098
														19.875
														16.8814
														12.1007
														14.5346
														15.0971
														13.9778
														9.2812
														11.8704
														13.0167
														17.8916
														12.8841
														13.8763
														10.6725
														11.9287
														13.6783
														15.9207
														15.9041
														12.7346
														14.7028
														26.0411
														21.0395
														22.1131
														15.7296
														9.27496
														13.9405
														16.7106
														14.4726
														13.9451
														13.914
														10.2232
														15.2048
														21.1126
														12.8899
														10.3771
														12.8516
														15.5572
														12.1984
														11.5025
														16.6383
														13.0429
														15.3465
														17.8139
														14.726
														8.18352
														15.0175
														16.1809
														14.0189
														19.2217
														14.108
														15.5642
														15.7047
														9.87006
														13.4896
														11.871
														12.6878
														15.0376
														10.6828
														12.8412
														12.5269
														13.2167
														9.93778
														11.622
														10.1281
														11.5751
														15.1552
														18.9187
														12.9034
														11.8057
														6.69205
														14.4745
														12.2954
														14.7692
														11.568
														8.71528
														13.5928
														16.8318
														17.8984
														8.62862
														15.3319
														13.9613
														11.3171
														10.2259
														17.9153
														14.9565

## Sheet: Fig. 3G
				Figure 3G (left panel)									Figure 3G (right panel)
				Average trace: UV IP3 uncaging									Bar-graph summary of UV IP3 uncaging
			X-axis: Time (sec), Y-axis: Cal520 fluorescence (DF/F0); SEM: std.error of mean										each data point represents average peak amplitude from several cells in an imaging field (167- 200 cells total, 4 imaging fields)
			Time (sec)	WT			TREM2 KO
				Mean	SEM		Mean	SEM					WT	TREM2 KO
			0	0.008038	0.002886		-0.00363	0.003101					4.20584	3.08893		Table Analyzed	IP3 uncaging Peak amplitude
			0.2	0.004956	0.002836		-0.00178	0.003017					4.38792	5.20252
			0.4	0.023734	0.009766		0.000639	0.00214					3.73578	3.64402		Column B	KO
			0.6	0.023201	0.009788		0.00039	0.002122					4.40782	3.62434		vs.	vs.
			0.8	0.021276	0.007454		-0.0008	0.002098								Column A	WT
			1	0.020804	0.007346		-0.00131	0.00207
			1.2	0.020727	0.007243		-0.00186	0.002051								Mann Whitney test
			1.4	0.020417	0.007204		-0.00046	0.002023								P value	0.3429
			1.6	0.019069	0.007063		0.001035	0.002016								Exact or approximate P value?	Exact
			1.8	0.02053	0.006969		0.003227	0.002024								P value summary	ns
			2	0.019451	0.006822		0.000358	0.001966								Significantly different? (P < 0.05)	No
			2.2	0.018453	0.006699		0.000229	0.001947								One- or two-tailed P value?	Two-tailed
			2.4	0.018164	0.006523		-0.00013	0.001916								Sum of ranks in column A,B	22.00 , 14.00
			2.6	0.01731	0.006396		7.13e-05	0.001882								Mann-Whitney U	4
			2.8	0.017823	0.006308		0.000363	0.001877
			3	0.017263	0.00618		0.000225	0.001872								Difference between medians
			3.2	0.015536	0.006037		0.000783	0.001855								Median of column A	4.297
			3.4	0.015161	0.005882		0.000258	0.001858								Median of column B	3.634
			3.6	0.016375	0.005723		0.001164	0.001795								Difference: Actual	-0.6627
			3.8	0.01523	0.005639		0.002392	0.001787								Difference: Hodges-Lehmann	-0.6142
			4	0.013647	0.005561		0.001494	0.001768
			4.2	0.014025	0.005435		-0.0008	0.001727
			4.4	0.013191	0.005338		0.001086	0.001738
			4.6	0.013659	0.005183		-0.00046	0.001736
			4.8	0.012021	0.005031		-0.00016	0.001651
			5	0.012782	0.004857		-0.0003	0.001611
			5.2	0.012422	0.004701		0.000129	0.001572
			5.4	0.011058	0.004555		0.000963	0.001577
			5.6	0.012176	0.004395		-0.00091	0.001493
			5.8	0.013436	0.004236		-0.00179	0.001442
			6	0.011193	0.004082		0.001881	0.001419
			6.2	0.011849	0.003959		0.001899	0.001375
			6.4	0.010602	0.003808		-0.00054	0.00133
			6.6	0.009837	0.003676		0.00017	0.001347
			6.8	0.009437	0.003569		-4.9e-05	0.001311
			7	0.008666	0.003462		0.000292	0.00125
			7.2	0.009527	0.003306		0.000132	0.001262
			7.4	0.007795	0.003198		0.000503	0.001238
			7.6	0.007438	0.003079		0.00172	0.001199
			7.8	0.007327	0.002947		0.001827	0.001126
			8	0.006841	0.002829		0.001738	0.00107
			8.2	0.005948	0.002674		0.002884	0.001068
			8.4	0.005358	0.002617		0.004378	0.00102
			8.6	0.006445	0.002525		-0.00024	0.000994
			8.8	0.005631	0.002432		0.0016	0.000972
			9	0.006011	0.002292		-0.00077	0.000908
			9.2	0.005934	0.002147		0.001297	0.000859
			9.4	0.004642	0.002035		0.000878	0.000808
			9.6	0.004433	0.001933		-0.00069	0.000766
			9.8	0.004261	0.001845		-0.00104	0.000744
			10	0.004018	0.001708		0.000297	0.000731
			10.2	0.003959	0.001617		0.000305	0.000712
			10.4	0.004795	0.001509		-0.00131	0.000674
			10.6	0.003082	0.001361		-0.00075	0.000692
			10.8	0.002889	0.001275		0.000853	0.000661
			11	0.000186	0.001143		-0.00123	0.000607
			11.2	0.00162	0.001033		-0.00148	0.000563
			11.4	0.002451	0.000946		-0.00245	0.000558
			11.6	0.000332	0.000867		-0.00097	0.000531
			11.8	0.000494	0.000758		0.000892	0.00049
			12	0.001172	0.000658		-0.00128	0.000458
			12.2	0.001501	0.000554		-0.00063	0.000462
			12.4	0.000906	0.000486		-7.7e-05	0.000371
			12.6	0.001161	0.000383		0.001742	0.000366
			12.8	0.000886	0.000322		-0.00142	0.000311
			13	0.001155	0.000282		-0.00142	0.000285
			13.2	0.000582	0.000252		-0.00123	0.000276
			13.4	-0.00038	0.000275		-0.00144	0.000282
			13.6	-0.00018	0.000321		0.002781	0.000357
			13.8	-0.00111	0.000404		-0.00117	0.000305
			14	-0.00164	0.000498		-0.0009	0.000321
			14.2	-0.00216	0.000584		0.000921	0.000394
			14.4	-0.00234	0.000671		0.001069	0.000469
			14.6	-0.00281	0.000749		0.000469	0.000413
			14.8	-0.00305	0.00082		0.001672	0.000442
			15	-0.00261	0.000906		0.001611	0.000624
			15.2	-0.00354	0.000977		-0.00038	0.000762
			15.4	-0.00229	0.00106		-0.00101	0.000779
			15.6	-0.00292	0.001131		0.001104	0.000881
			15.8	-0.00296	0.00117		0.002932	0.000898
			16	-0.00376	0.001216		0.003662	0.000932
			16.2	-0.00292	0.001269		0.000633	0.001086
			16.4	-0.0033	0.001316		0.002183	0.001391
			16.6	-0.00434	0.001369		0.000575	0.001524
			16.8	-0.0046	0.001427		0.002894	0.001648
			17	-0.00414	0.001489		0.000748	0.001691
			17.2	-0.00456	0.00154		0.00154	0.001853
			17.4	-0.00462	0.001562		0.002097	0.002099
			17.6	-0.00472	0.001628		0.002351	0.002073
			17.8	-0.00415	0.001628		0.003797	0.002124
			18	-0.0041	0.001683		0.003807	0.002237
			18.2	-0.00508	0.001738		0.003726	0.00236
			18.4	-0.00522	0.001794		0.003065	0.00249
			18.6	-0.0056	0.001815		0.002968	0.00265
			18.8	-0.0058	0.001857		0.003674	0.002798
			19	-0.00749	0.001885		0.000713	0.002945
			19.2	-0.00645	0.001926		0.003826	0.003066
			19.4	-0.00638	0.001966		0.002243	0.003216
			19.6	-0.00654	0.002025		0.003478	0.003396
			19.8	-0.00736	0.002062		0.002141	0.003605
			20	-0.00751	0.002113		0.003918	0.003797
			20.2	-0.00812	0.002142		0.002644	0.004044
			20.4	-0.00966	0.002175		0.004949	0.004312
			20.6	-0.00941	0.002205		0.003371	0.004614
			20.8	-0.00957	0.002233		0.004275	0.004917
			21	0.151482	0.031085		0.223479	0.027535
			21.2	0.479867	0.069268		0.136445	0.023998
			21.4	0.84499	0.094832		0.303453	0.043966
			21.6	1.25161	0.114674		0.486933	0.065232
			21.8	1.67064	0.133042		0.676204	0.081971
			22	2.06927	0.147272		0.875697	0.094752
			22.2	2.39294	0.156285		1.08654	0.105523
			22.4	2.62941	0.159279		1.32103	0.114396
			22.6	2.83809	0.15989		1.5504	0.120958
			22.8	3.00379	0.158855		1.78953	0.126228
			23	3.1185	0.155939		2.02636	0.130229
			23.2	3.19355	0.152212		2.24565	0.132449
			23.4	3.25621	0.148317		2.45891	0.135218
			23.6	3.29695	0.144147		2.62473	0.137467
			23.8	3.32387	0.140232		2.75276	0.137434
			24	3.33883	0.136282		2.84727	0.135711
			24.2	3.3307	0.132968		2.9216	0.132905
			24.4	3.31196	0.129187		2.96886	0.129332
			24.6	3.29151	0.125331		3.00376	0.125772
			24.8	3.25938	0.121244		3.02362	0.122033
			25	3.22667	0.117096		3.02634	0.118386
			25.2	3.19223	0.113299		3.03721	0.115099
			25.4	3.16292	0.109517		3.03615	0.111326
			25.6	3.12812	0.105659		3.03085	0.108032
			25.8	3.09495	0.101743		3.01665	0.104732
			26	3.06053	0.09793		3.01471	0.102396
			26.2	3.02546	0.094537		2.99118	0.099017
			26.4	2.99851	0.091386		2.96935	0.095988
			26.6	2.95844	0.088087		2.95672	0.0933
			26.8	2.92813	0.085086		2.93951	0.091781
			27	2.8929	0.082066		2.91592	0.089565
			27.2	2.85907	0.079238		2.89215	0.087572
			27.4	2.82697	0.076645		2.87625	0.086046
			27.6	2.78641	0.074047		2.84511	0.084139
			27.8	2.7532	0.071626		2.82436	0.082965
			28	2.71755	0.069372		2.77646	0.081559
			28.2	2.68046	0.067244		2.74883	0.079955
			28.4	2.64294	0.065287		2.71674	0.078311
			28.6	2.60835	0.063374		2.67885	0.076814
			28.8	2.57116	0.061629		2.64102	0.07565
			29	2.53734	0.05995		2.61446	0.074461
			29.2	2.50146	0.058301		2.57391	0.072825
			29.4	2.46238	0.05681		2.53831	0.071233
			29.6	2.43068	0.05557		2.50485	0.069774
			29.8	2.39288	0.054307		2.47558	0.068754
			30	2.35757	0.053057		2.4345	0.067464
			30.2	2.32282	0.051937		2.39438	0.066332
			30.4	2.28924	0.050913		2.36186	0.0653
			30.6	2.25488	0.049911		2.3301	0.063933
			30.8	2.21587	0.049004		2.29101	0.063017
			31	2.18782	0.048208		2.25979	0.062519
			31.2	2.15336	0.047349		2.22663	0.061405
			31.4	2.12257	0.046666		2.19759	0.060296
			31.6	2.0944	0.046131		2.16475	0.059335
			31.8	2.06148	0.045544		2.12875	0.058333
			32	2.0269	0.044974		2.10182	0.057508
			32.2	1.99517	0.044478		2.07043	0.056925
			32.4	1.96554	0.043967		2.04352	0.056006
			32.6	1.93934	0.043494		2.01977	0.054961
			32.8	1.91205	0.043108		1.98719	0.053848
			33	1.88442	0.042721		1.96033	0.053677
			33.2	1.85615	0.0423		1.93287	0.052679
			33.4	1.83036	0.04199		1.90389	0.051609
			33.6	1.80316	0.041692		1.88612	0.051087
			33.8	1.7792	0.041385		1.86048	0.050512
			34	1.74982	0.041173		1.83605	0.049724
			34.2	1.72083	0.040859		1.80997	0.049317
			34.4	1.69691	0.040647		1.78266	0.048772
			34.6	1.67235	0.040509		1.75761	0.048127
			34.8	1.65271	0.04049		1.73524	0.047618
			35	1.62986	0.040326		1.71812	0.047303
			35.2	1.60111	0.040124		1.69778	0.046761
			35.4	1.58125	0.040056		1.67486	0.046255
			35.6	1.55766	0.039841		1.65394	0.045829
			35.8	1.53659	0.039728		1.6327	0.045691
			36	1.51894	0.039641		1.61845	0.04552
			36.2	1.49209	0.03945		1.59024	0.0448
			36.4	1.4743	0.039358		1.57441	0.044743
			36.6	1.45738	0.03924		1.56089	0.044214
			36.8	1.43665	0.039077		1.54633	0.044561
			37	1.41425	0.038921		1.52841	0.044194
			37.2	1.39616	0.03887		1.51109	0.04387
			37.4	1.37879	0.038762		1.49838	0.044177
			37.6	1.36174	0.038669		1.48592	0.043776
			37.8	1.34263	0.03855		1.4674	0.043482
			38	1.32427	0.03847		1.44945	0.043422
			38.2	1.3094	0.038418		1.42603	0.043226
			38.4	1.29257	0.038263		1.41548	0.043035
			38.6	1.27354	0.038168		1.40867	0.042843
			38.8	1.25688	0.038059		1.39667	0.042955
			39	1.23934	0.03797		1.37951	0.042956
			39.2	1.22066	0.037847		1.36223	0.042975
			39.4	1.20474	0.037747		1.35566	0.043212
			39.6	1.18853	0.037677		1.34978	0.043147
			39.8	1.17327	0.037566		1.33803	0.042983
			40	1.16192	0.037502		1.32766	0.043053
			40.2	1.149	0.037432		1.31169	0.043252
			40.4	1.13589	0.037315		1.30365	0.043493
			40.6	1.1205	0.037166		1.29593	0.043408
			40.8	1.10568	0.037085		1.28543	0.043625
			41	1.09493	0.036954		1.27758	0.043644
			41.2	1.08107	0.036849		1.26876	0.043668
			41.4	1.06747	0.03671		1.25848	0.043496
			41.6	1.05458	0.036615		1.24615	0.043651
			41.8	1.03904	0.036462		1.23751	0.043713
			42	1.02904	0.036355		1.22817	0.043803
			42.2	1.01646	0.036243		1.22115	0.04392
			42.4	1.00708	0.03625		1.215	0.043831
			42.6	0.992952	0.036119		1.20715	0.04417
			42.8	0.979432	0.035944		1.20518	0.044313
			43	0.967301	0.035774		1.19331	0.044156
			43.2	0.954074	0.035607		1.18379	0.044514
			43.4	0.945412	0.035547		1.18049	0.044786
			43.6	0.934117	0.035323		1.1756	0.044958
			43.8	0.922382	0.035175		1.17028	0.044929
			44	0.911389	0.034953		1.1618	0.044996
			44.2	0.902051	0.034801		1.15288	0.044971
			44.4	0.891382	0.034644		1.14634	0.045238
			44.6	0.879353	0.034475		1.14128	0.045285
			44.8	0.866321	0.034282		1.13305	0.045271
			45	0.859058	0.034231		1.12922	0.045588
			45.2	0.851653	0.034139		1.12294	0.045849
			45.4	0.84181	0.033987		1.12117	0.045972
			45.6	0.833354	0.033832		1.11401	0.046005
			45.8	0.822989	0.033667		1.10778	0.045998
			46	0.818826	0.0336		1.10688	0.046175
			46.2	0.80901	0.033501		1.09687	0.046255
			46.4	0.801814	0.033372		1.09171	0.046354
			46.6	0.791125	0.033127		1.08743	0.046589
			46.8	0.784018	0.03308		1.0835	0.046848
			47	0.776798	0.032965		1.07764	0.047101
			47.2	0.768469	0.032818		1.06977	0.046936
			47.4	0.759413	0.032648		1.06963	0.047389
			47.6	0.751832	0.032573		1.05841	0.047231
			47.8	0.745494	0.032509		1.05406	0.047495
			48	0.739231	0.032462		1.05385	0.04761
			48.2	0.730017	0.032336		1.051	0.047779
			48.4	0.724006	0.032151		1.04969	0.047827
			48.6	0.716922	0.031988		1.04063	0.047663
			48.8	0.711546	0.031925		1.03967	0.048019
			49	0.706935	0.031856		1.03526	0.048143
			49.2	0.701161	0.031796		1.03421	0.048445
			49.4	0.699379	0.031928		1.02776	0.048278
			49.6	0.694304	0.031846		1.02376	0.048357
			49.8	0.689003	0.031734		1.02119	0.048555
			50	0.68399	0.031728		1.0194	0.048787
			50.2	0.677707	0.031557		1.01386	0.048683
			50.4	0.672834	0.031444		1.00854	0.048544
			50.6	0.667384	0.031365		1.00837	0.048817
			50.8	0.661047	0.031213		1.00656	0.048858
			51	0.654554	0.031075		1.00635	0.04887
			51.2	0.648148	0.030888		1.00186	0.04916
			51.4	0.644874	0.030867		1.00204	0.049208
			51.6	0.641748	0.030827		0.993281	0.049343
			51.8	0.635819	0.030748		0.994755	0.049638
			52	0.629803	0.030698		0.995604	0.049718
			52.2	0.62577	0.030621		0.990726	0.049548
			52.4	0.622377	0.030592		0.989429	0.049711
			52.6	0.618799	0.030501		0.985375	0.050092
			52.8	0.612104	0.030369		0.982477	0.050147
			53	0.605634	0.03028		0.981773	0.050297
			53.2	0.599826	0.030224		0.979638	0.050336
			53.4	0.596944	0.030156		0.977649	0.050598
			53.6	0.592905	0.030075		0.978047	0.050945
			53.8	0.58845	0.029947		0.977096	0.05107
			54	0.583839	0.02978		0.973301	0.051082
			54.2	0.580637	0.029794		0.972369	0.051445
			54.4	0.576407	0.029713		0.972119	0.051264
			54.6	0.572772	0.029605		0.970503	0.051146
			54.8	0.568367	0.029521		0.965767	0.051182
			55	0.564698	0.029448		0.963273	0.051444
			55.2	0.560466	0.029325		0.964806	0.051557
			55.4	0.556837	0.029223		0.967117	0.051669
			55.6	0.554403	0.029089		0.965134	0.052057
			55.8	0.553598	0.029111		0.966209	0.052079
			56	0.547858	0.029024		0.960746	0.052103
			56.2	0.543926	0.028954		0.962039	0.052046
			56.4	0.541497	0.028981		0.959134	0.052159
			56.6	0.541851	0.029089		0.960109	0.052349
			56.8	0.538173	0.029005		0.963973	0.052715
			57	0.53182	0.028891		0.962571	0.052722
			57.2	0.529141	0.028834		0.963693	0.052807
			57.4	0.52595	0.028753		0.963493	0.052997
			57.6	0.520957	0.028746		0.959237	0.052965
			57.8	0.518077	0.028676		0.960164	0.052921
			58	0.517126	0.028649		0.963006	0.053248
			58.2	0.515458	0.028614		0.961074	0.053052
			58.4	0.512943	0.028611		0.960009	0.053091
			58.6	0.511349	0.0286		0.960645	0.053184
			58.8	0.509965	0.028626		0.956124	0.05309
			59	0.50664	0.028614		0.956153	0.053121
			59.2	0.503898	0.028678		0.95835	0.053375
			59.4	0.501928	0.028657		0.951374	0.053346
			59.6	0.497712	0.028525		0.947675	0.053326
			59.8	0.495116	0.028487		0.951082	0.053511
			60	0.493356	0.028512		0.955847	0.053559

## Sheet: Fig 3 Supp 1 Panel A
				Fig. 3-fig supp 1A (left panel)									Fig. 3-fig supp 1A (right panel)
			AverageTrace: SOCE in TREM2 KO cells (control and Synta66 pre-treated)
			X-axis: Time (s), Y-axis: Fluo-4/Fura-Red Ratio; SEM: std.error of mean
													TREM2 KO microglia
				TREM2 KO microglia									SOCE Rate
				Control			Synta66						Control	Synta66
			Time (s)	Mean	SEM		Mean	SEM					column C	column D
		1Ca	0	0.118108	0.001993		0.113963	0.002921					0.152989	0.003729			Mann Whitney test
			2	0.118076	0.00217		0.113502	0.002737					0.132789	0.008032			P value	< 0.0001
			4	0.118741	0.002139		0.113136	0.002693					0.121928	0.010156			Exact or approximate P value?	Exact
			6	0.117986	0.002104		0.113326	0.002633					0.117699	0.007847			P value summary	****
			8	0.118192	0.001928		0.113751	0.002685					0.14244	0.007978			Significantly different? (P < 0.05)	Yes
			10	0.117586	0.001948		0.114159	0.002752					0.122459	0.00409			One- or two-tailed P value?	Two-tailed
			12	0.118438	0.002087		0.114253	0.002696					0.123871	0.003576			Sum of ranks in column C,D	18081 , 3240
			14	0.117675	0.002096		0.113764	0.002709					0.158209	0.005803			Mann-Whitney U	0
			16	0.11783	0.002219		0.114213	0.002664					0.168798	0.004415
			18	0.115744	0.002017		0.114043	0.002659					0.109567	0.005875			Difference between medians
			20	0.114971	0.00203		0.114948	0.00258					0.12543	0.003933			Median of column C	0.1506
			22	0.115168	0.001935		0.115689	0.002525					0.162205	0.005741			Median of column D	0.003925
			24	0.116156	0.002182		0.116313	0.002523					0.145124	0.002147			Difference: Actual	-0.1466
			26	0.116761	0.00223		0.116623	0.002707					0.16323	0.005143			Difference: Hodges-Lehmann	-0.1462
			28	0.11531	0.002108		0.116472	0.002638					0.150071	0.005302
			30	0.11601	0.00208		0.116184	0.002713					0.143856	0.010968
			32	0.117342	0.002298		0.115871	0.002697					0.152972	0.008564
			34	0.11846	0.002231		0.114697	0.002668					0.15759	0.01082
			36	0.118336	0.002139		0.115086	0.002589					0.201692	0.003672
			38	0.118053	0.001967		0.115239	0.002535					0.203149	0.004189
			40	0.118497	0.001897		0.115742	0.002546					0.156107	0.001884
			42	0.119039	0.001946		0.115686	0.002583					0.153435	0.003593
			44	0.120157	0.001926		0.115007	0.002507					0.109909	0.004861
			46	0.120528	0.001909		0.115002	0.002571					0.168017	0.005654
			48	0.119914	0.001929		0.115593	0.002581					0.135943	0.002859
			50	0.118776	0.002013		0.116521	0.002614					0.126574	0.005867
			52	0.119369	0.002008		0.117795	0.002638					0.102923	0.004421
			54	0.119795	0.002002		0.116986	0.002615					0.117692	0.004056
			56	0.120312	0.00196		0.11657	0.002682					0.144053	0.003328
			58	0.119768	0.001948		0.115355	0.00261					0.171276	0.004116
		0CaTG	60	0.119783	0.002041		0.116811	0.002726					0.189429	0.001994
			62	0.118526	0.002034		0.116157	0.002707					0.153545	0.005291
			64	0.118299	0.002096		0.116242	0.002721					0.159434	0.002901
			66	0.117981	0.002108		0.115317	0.002607					0.136523	0.00766
			68	0.11867	0.002176		0.114624	0.002619					0.178074	0.006083
			70	0.11744	0.002187		0.114007	0.002632					0.141502	0.005071
			72	0.116763	0.002122		0.113162	0.002622					0.176217	0.002233
			74	0.116825	0.002155		0.11429	0.002673					0.154701	0.003917
			76	0.117204	0.002125		0.11456	0.002549					0.166415	0.004212
			78	0.116978	0.002066		0.114555	0.002588					0.174069	0.0028
			80	0.115378	0.001793		0.115196	0.002375					0.181689	0.002829
			82	0.115241	0.001812		0.114646	0.002379					0.154293	0.00759
			84	0.115504	0.001815		0.114713	0.00229					0.091345	0.003008
			86	0.117001	0.001988		0.112711	0.002434					0.187855	0.0019
			88	0.117353	0.001962		0.112651	0.002603					0.149989	0.005737
			90	0.119019	0.002015		0.113776	0.002539					0.145014	0.004761
			92	0.119584	0.001964		0.116932	0.002561					0.180682	0.002932
			94	0.123249	0.002097		0.120372	0.002598					0.160154	0.002392
			96	0.127782	0.002146		0.124565	0.002648					0.179964	0.002625
			98	0.13694	0.002398		0.130494	0.002576					0.1453	0.00663
			100	0.147515	0.003005		0.137999	0.002661					0.119748	0.001655
			102	0.160475	0.003618		0.147172	0.003099					0.187003	0.00208
			104	0.17536	0.004561		0.158736	0.003373					0.151284	0.005713
			106	0.194021	0.005392		0.172955	0.004004					0.130706	0.003427
			108	0.212979	0.006549		0.191193	0.004474					0.158106	0.003788
			110	0.237321	0.007776		0.212886	0.005464					0.14822	0.003851
			112	0.261869	0.009387		0.2394	0.006561					0.167867	0.003768
			114	0.292026	0.011015		0.268883	0.008132					0.194581	0.003913
			116	0.320241	0.012114		0.301374	0.010511					0.166857	0.003132
			118	0.349081	0.012724		0.338141	0.013428					0.150833	0.006291
			120	0.379552	0.013126		0.376329	0.015184					0.139547	0.003274
			122	0.407411	0.013541		0.413887	0.0163					0.151687	0.003852
			124	0.432813	0.013903		0.447178	0.017242					0.171912	0.003433
			126	0.452375	0.01391		0.473739	0.017874					0.140074	0.004617
			128	0.469949	0.013606		0.497183	0.018515					0.148025	0.004315
			130	0.483542	0.013089		0.509956	0.018076					0.12923	0.001916
			132	0.493141	0.012629		0.519046	0.018083					0.185521	0.007526
			134	0.500307	0.012465		0.523289	0.017571					0.163168	0.002465
			136	0.509526	0.012397		0.526945	0.017059					0.141822	0.00699
			138	0.516843	0.012129		0.529911	0.01674					0.136652	0.003189
			140	0.522793	0.011851		0.534527	0.016398					0.191624	0.003517
			142	0.526037	0.011099		0.536824	0.015921					0.12241	0.003007
			144	0.526101	0.010499		0.534649	0.015273					0.153332	0.002981
			146	0.523577	0.010025		0.528942	0.014809					0.18304	0.005684
			148	0.519865	0.009875		0.522897	0.014835					0.13119	0.008599
			150	0.518262	0.009919		0.521996	0.0148					0.143254	0.00255
			152	0.518543	0.009644		0.514561	0.013578					0.153037	0.002636
			154	0.514123	0.009142		0.510966	0.012977					0.203515	0.002235
			156	0.511145	0.009207		0.505699	0.012715					0.176208	0.001953
			158	0.507084	0.00941		0.505487	0.012841					0.139528	0.005245
			160	0.505807	0.00964		0.500479	0.012769					0.168736
			162	0.500906	0.009244		0.49282	0.012141					0.181695
			164	0.496477	0.009476		0.487419	0.012388					0.170784
			166	0.493409	0.00924		0.484016	0.01219					0.140866
			168	0.491066	0.009532		0.483717	0.012163					0.113467
			170	0.490395	0.009479		0.480278	0.012275					0.152043
			172	0.486585	0.009351		0.476139	0.012345					0.164877
			174	0.482573	0.009308		0.470053	0.01226					0.096322
			176	0.477018	0.009668		0.467751	0.012547					0.150533
			178	0.47495	0.00968		0.463206	0.01207					0.141177
			180	0.468752	0.009543		0.459041	0.011989					0.163202
			182	0.465513	0.009283		0.452515	0.011524					0.141272
			184	0.458991	0.009511		0.448791	0.012014					0.167137
			186	0.453738	0.009193		0.444094	0.012553					0.173726
			188	0.445947	0.009457		0.439655	0.012723					0.135642
			190	0.439057	0.009233		0.434691	0.01254					0.155333
			192	0.438523	0.009761		0.432139	0.012622					0.120065
			194	0.439602	0.00986		0.42905	0.012713					0.14221
			196	0.437252	0.009887		0.424213	0.012747					0.150586
			198	0.431832	0.010078		0.415962	0.012873					0.142683
			200	0.424694	0.010017		0.408728	0.012807					0.165132
			202	0.419462	0.010155		0.39995	0.012517					0.154779
			204	0.414401	0.009786		0.396762	0.012195					0.148683
			206	0.40885	0.009729		0.391723	0.012094					0.139798
			208	0.403646	0.009532		0.391605	0.012326					0.150278
			210	0.400498	0.009494		0.38658	0.012364					0.147174
			212	0.397651	0.009398		0.38315	0.012375					0.164953
			214	0.395575	0.009754		0.379726	0.012354					0.189758
			216	0.389943	0.009967		0.376904	0.012125					0.168197
			218	0.386123	0.010284		0.371626	0.012279					0.132041
			220	0.382129	0.009949		0.365703	0.01222					0.115013
			222	0.378986	0.009755		0.362027	0.012444					0.150192
			224	0.372246	0.009528		0.358272	0.012281					0.146322
			226	0.367742	0.009514		0.354282	0.012196					0.147109
			228	0.363547	0.009572		0.350123	0.012055					0.149379
			230	0.36088	0.009684		0.347117	0.011989					0.134396
			232	0.354955	0.009745		0.343307	0.012224					0.153322
			234	0.350232	0.009986		0.340249	0.01268					0.143782
			236	0.346515	0.009999		0.335827	0.012703					0.15815
			238	0.342715	0.009907		0.333231	0.012641					0.131973
			240	0.339105	0.009802		0.329022	0.012571					0.154401
			242	0.335648	0.009709		0.327242	0.012723					0.140957
			244	0.332038	0.009774		0.322461	0.012427					0.113482
			246	0.327102	0.009772		0.315831	0.012196					0.160474
			248	0.321391	0.009739		0.310314	0.012212					0.114022
			250	0.318091	0.009999		0.307926	0.012466					0.144908
			252	0.314855	0.00996		0.305437	0.012403
			254	0.311713	0.010026		0.300626	0.0122
			256	0.307889	0.010065		0.294594	0.012223
			258	0.305178	0.009873		0.290849	0.012169
			260	0.302655	0.009704		0.28938	0.012468
			262	0.2995	0.009562		0.285376	0.012202
			264	0.294385	0.009597		0.283251	0.01215
			266	0.292086	0.009699		0.279056	0.012087
			268	0.286625	0.009505		0.278533	0.012394
			270	0.282481	0.009464		0.275618	0.012154
			272	0.277245	0.009472		0.273227	0.012027
			274	0.276125	0.009528		0.270847	0.011891
			276	0.274231	0.009466		0.267501	0.012115
			278	0.26853	0.009416		0.264116	0.012174
			280	0.26229	0.009332		0.261112	0.0123
			282	0.256872	0.009233		0.258428	0.01245
			284	0.255239	0.009161		0.256431	0.012578
			286	0.252965	0.008995		0.251636	0.012347
			288	0.250137	0.009062		0.247571	0.011993
			290	0.244606	0.008855		0.242395	0.011503
			292	0.241121	0.008535		0.24071	0.011648
			294	0.239354	0.008465		0.238911	0.011671
			296	0.238439	0.008461		0.235957	0.011561
			298	0.237583	0.008847		0.231845	0.011413
			300	0.232549	0.008422		0.228737	0.011165
			302	0.229563	0.008246		0.226837	0.011094
			304	0.222903	0.00825		0.226212	0.011088
			306	0.220654	0.008377		0.223717	0.011086
			308	0.217467	0.008363		0.221513	0.011229
			310	0.21741	0.008085		0.217379	0.010966
			312	0.216173	0.008162		0.215006	0.010914
			314	0.214755	0.008339		0.212908	0.010833
			316	0.213671	0.008384		0.212079	0.010814
			318	0.210267	0.008169		0.209629	0.010576
			320	0.206581	0.007587		0.209691	0.010392
			322	0.203782	0.007599		0.208298	0.010225
			324	0.202593	0.007562		0.207354	0.010224
			326	0.202006	0.007682		0.204	0.010445
			328	0.200475	0.007606		0.200674	0.010419
			330	0.198445	0.007459		0.198905	0.010459
			332	0.195453	0.00728		0.195157	0.010129
			334	0.192104	0.00722		0.191958	0.009911
			336	0.188802	0.007129		0.188978	0.009777
			338	0.186342	0.007049		0.187467	0.009586
			340	0.184283	0.007165		0.18592	0.009593
			342	0.1821	0.007227		0.183339	0.009348
			344	0.180135	0.007239		0.180695	0.008978
			346	0.177654	0.006798		0.17893	0.008693
			348	0.176514	0.006531		0.177019	0.008574
			350	0.176168	0.006772		0.175292	0.008611
			352	0.175375	0.006928		0.173705	0.008512
			354	0.174446	0.006872		0.172807	0.00846
			356	0.172656	0.00636		0.17223	0.008503
			358	0.171761	0.006302		0.170934	0.008492
			360	0.170633	0.006204		0.168102	0.008336
			362	0.168774	0.006202		0.166597	0.008352
			364	0.168135	0.005979		0.164542	0.008359
			366	0.166055	0.005928		0.163924	0.00827
			368	0.16491	0.005773		0.161476	0.008097
			370	0.162142	0.005857		0.160138	0.007972
			372	0.161071	0.005774		0.158592	0.007821
			374	0.15926	0.005812		0.158666	0.007653
			376	0.158583	0.005847		0.157537	0.007477
			378	0.156041	0.005826		0.157204	0.007589
			380	0.156094	0.005874		0.15421	0.007408
			382	0.15504	0.005638		0.151547	0.007297
			384	0.15546	0.005479		0.150101	0.007
			386	0.153867	0.00507		0.149221	0.006876
			388	0.152563	0.005021		0.148831	0.006845
			390	0.151469	0.005007		0.147253	0.006849
			392	0.14964	0.00497		0.146403	0.006695
			394	0.149385	0.005013		0.146338	0.006714
			396	0.147831	0.004827		0.145399	0.006624
			398	0.146717	0.004922		0.143607	0.006619
			400	0.144618	0.004886		0.14018	0.006454
			402	0.143455	0.004857		0.13861	0.00637
			404	0.142224	0.004835		0.137082	0.006162
			406	0.140119	0.004745		0.136849	0.006051
			408	0.139166	0.004715		0.136102	0.0061
			410	0.138388	0.004606		0.135768	0.00604
			412	0.136745	0.004502		0.134719	0.005995
			414	0.135111	0.004545		0.134273	0.005715
			416	0.133946	0.004422		0.135125	0.005842
			418	0.134467	0.004187		0.134153	0.005704
			420	0.134133	0.004127		0.132555	0.005749
			422	0.133648	0.004117		0.131225	0.005706
			424	0.133769	0.004179		0.131256	0.005584
			426	0.132445	0.00405		0.130994	0.005407
			428	0.130293	0.004003		0.129325	0.005106
			430	0.127556	0.003879		0.12848	0.004959
			432	0.126745	0.003743		0.127634	0.004842
			434	0.126901	0.003633		0.126919	0.004752
			436	0.126337	0.003624		0.125881	0.004743
			438	0.125272	0.003611		0.125457	0.004674
		1Ca	440	0.123231	0.003491		0.12401	0.004582
			442	0.122284	0.003405		0.123408	0.004513
			444	0.138969	0.003745		0.122697	0.004674
			446	0.325073	0.008767		0.122516	0.004629
			448	0.670261	0.01775		0.120644	0.004319
			450	1.09694	0.026322		0.119559	0.00403
			452	1.35827	0.029086		0.117646	0.003778
			454	1.50074	0.030117		0.116531	0.00381
			456	1.59505	0.030645		0.115597	0.003707
			458	1.66257	0.031123		0.118344	0.00386
			460	1.71633	0.032025		0.12242	0.004051
			462	1.75662	0.033635		0.128666	0.004125
			464	1.79001	0.035703		0.135292	0.00422
			466	1.81365	0.03705		0.143958	0.004376
			468	1.84396	0.037364		0.152458	0.004652
			470	1.86327	0.037238		0.161718	0.004986
			472	1.87891	0.036532		0.170839	0.005527
			474	1.88661	0.037303		0.181756	0.005812
			476	1.89455	0.03835		0.19165	0.006425
			478	1.90107	0.039597		0.201564	0.00678
			480	1.91072	0.040479		0.210048	0.007362
			482	1.90941	0.039948		0.222537	0.007941
			484	1.90943	0.039923		0.233841	0.008938
			486	1.90271	0.041154		0.247269	0.009518
			488	1.91099	0.042646		0.257856	0.009996
			490	1.91528	0.043874		0.269511	0.010332
			492	1.91902	0.044556		0.278219	0.010906
			494	1.91529	0.045484		0.287611	0.011279
			496	1.92063	0.046708		0.29703	0.011473
			498	1.93164	0.046597		0.307381	0.011876
			500	1.93344	0.046165		0.316795	0.012281
			502	1.9349	0.044854		0.326535	0.012723
			504	1.93373	0.044516		0.339358	0.013105
			506	1.93806	0.044782		0.352349	0.013566
			508	1.93861	0.045421		0.364785	0.014128
			510	1.93594	0.046482		0.376882	0.014474
			512	1.93312	0.046397		0.388455	0.014561
			514	1.92054	0.04632		0.39589	0.015129
			516	1.91853	0.04559		0.403182	0.015644
			518	1.92072	0.047225		0.411406	0.016475
			520	1.92641	0.047834		0.420525	0.016761
			522	1.91504	0.048535		0.42632	0.017226
			524	1.90941	0.048378		0.430357	0.017548
			526	1.90508	0.047731		0.43715	0.017617
			528	1.91492	0.04748		0.440907	0.017778
			530	1.91544	0.047561		0.442777	0.017911
			532	1.92162	0.048663		0.444386	0.018052
			534	1.91799	0.049494		0.447195	0.017992
			536	1.91614	0.049906		0.453223	0.018284
			538	1.9149	0.050591		0.45455	0.018287
			540	1.90931	0.051106		0.45597	0.018294
			542	1.91842	0.051713		0.456315	0.018666
			544	1.91744	0.051701		0.460095	0.018937
			546	1.92109	0.051767		0.464392	0.01945
			548	1.919	0.050702		0.463682	0.019234
			550	1.90866	0.049982		0.463188	0.019342
			552	1.90905	0.049903		0.464314	0.019358
			554	1.9032	0.050499		0.466323	0.019054
			556	1.90749	0.05103		0.467787	0.018966
			558	1.90968	0.05058		0.46733	0.018476
			560	1.90865	0.050911		0.47102	0.018712
			562	1.90256	0.050532		0.472728	0.01869
			564	1.88989	0.051557		0.472721	0.018501
			566	1.88793	0.051282		0.469072	0.018021
			568	1.88675	0.051242		0.466145	0.017875
			570	1.89116	0.050919		0.467367	0.018099
			572	1.88719	0.052159		0.469031	0.018296
			574	1.88099	0.051636		0.470957	0.017623
			576	1.87142	0.052125		0.46931	0.017304
			578	1.84648	0.051298		0.468318	0.016952
			580	1.8339	0.052427		0.468184	0.017088
			582	1.82518	0.052168		0.472052	0.017332
			584	1.83104	0.052311		0.477313	0.017272
			586	1.82787	0.052608		0.476736	0.01758
			588	1.82056	0.053263		0.477431	0.017632
			590	1.80988	0.053512		0.474377	0.017283
			592	1.80727	0.053801		0.477367	0.017306
			594	1.80846	0.053691		0.475596	0.017079
			596	1.80426	0.053817		0.47669	0.017407
			598	1.81172	0.054305		0.47404	0.017277
		0Ca	600	1.81636	0.054361		0.47343	0.017574
			602	1.81771	0.05471		0.46755	0.017101
			604	1.74089	0.056286		0.462739	0.016778
			606	1.60036	0.060062		0.44776	0.01603
			608	1.4155	0.063785		0.432814	0.015558
			610	1.25564	0.0662		0.413933	0.014607
			612	1.12244	0.067138		0.399358	0.013951
			614	1.0103	0.066794		0.382086	0.013158
			616	0.918883	0.066029		0.362845	0.012095
			618	0.842556	0.064553		0.341208	0.011051
			620	0.781305	0.06381		0.318433	0.010339
			622	0.731092	0.062795		0.298333	0.009989
			624	0.68611	0.061808		0.278868	0.009442
			626	0.650079	0.060573		0.263081	0.008916
			628	0.616508	0.059293		0.246719	0.008377
			630	0.592546	0.058484		0.233912	0.008131
			632	0.570529	0.057557		0.221669	0.007847
			634	0.554865	0.056797		0.210872	0.007558
			636	0.532359	0.055258		0.200221	0.007249
			638	0.514371	0.053823		0.190948	0.007098
			640	0.49738	0.052825		0.181903	0.006699
			642	0.489675	0.052155		0.175408	0.006468
			644	0.475946	0.050912		0.168043	0.006137
			646	0.463318	0.049629		0.163213	0.006064
			648	0.449855	0.048299		0.157045	0.005776
			650	0.442562	0.047496		0.153633	0.005769
			652	0.433696	0.046814		0.149041	0.005513
			654	0.427429	0.046318		0.144105	0.005422
			656	0.415588	0.045048		0.139508	0.005329
			658	0.408447	0.043956		0.135563	0.00534
			660	0.399096	0.042931		0.131816	0.00502
			662	0.392893	0.042168		0.128377	0.004606
			664	0.384425	0.041353		0.126407	0.004341
			666	0.38005	0.040733		0.126155	0.004515
			668	0.3744	0.039959		0.124161	0.004588
			670	0.368709	0.039345		0.119861	0.004423
			672	0.359226	0.038368		0.116526	0.004245
			674	0.354748	0.038024		0.113608	0.004079
			676	0.349665	0.037022		0.113219	0.004194
			678	0.346932	0.036496		0.110718	0.003917
			680	0.342688	0.03583		0.108549	0.003779
			682	0.339914	0.035579		0.104578	0.003563
			684	0.335387	0.03505		0.103512	0.003515
			686	0.331575	0.034316		0.102845	0.003514
			688	0.326353	0.033569		0.103782	0.003484
			690	0.322438	0.032949		0.102663	0.003358
			692	0.317701	0.032421		0.100966	0.003089
			694	0.313569	0.031888		0.098823	0.002902
			696	0.312483	0.031428		0.097209	0.002818
			698	0.309249	0.031164		0.097054	0.002805
			700	0.308092	0.030802		0.095994	0.002766
			702	0.30527	0.030503		0.09536	0.002641
			704				0.093751	0.002711
			706				0.093321	0.002726
			708				0.092685	0.002717
			710				0.092121	0.002601
			712				0.092334	0.00248
			714				0.091699	0.002475
			716				0.091527	0.00242
			718				0.090116	0.002464
			720				0.090237	0.002361
			722				0.090507	0.002408
			724				0.090719	0.002479
			726				0.090077	0.002446
			728				0.08891	0.00215
			730				0.090055	0.00193
			732				0.090796	0.001928
			734				0.091288	0.002046
			736				0.090273	0.00195
			738				0.08947	0.001836
			740				0.088387	0.001855
			742				0.087896	0.001878
			744				0.087718	0.001905
			746				0.087663	0.001871
			748				0.086975	0.001893
			750				0.087111	0.00178
			752				0.088057	0.00176
			754
			756
			758
			760
			762
			764
			766
			768
			770
			772
			774
			776
			778
			780
			782
			784
			786
			788
			790
			792
			794
			796
			798
			800
			802
			804
			806
			808
			810
			812
			814
			816
			818
			820
			822
			824
			826
			828
			830
			832
			834
			836
			838
			840
			842
			844
			846
			848
			850
			852
			854
			856
			858
			860
			862
			864
			866
			868
			870
			872
			874
			876
			878
			880
			882
			884
			886

## Sheet: Fig 3 Supp 1 Panel B
			Fig. 3-fig supp 1B (left panel)
													Fig. 3-fig supp 1B (right panel)
		AverageTrace: SOCE induced by ADP in TREM2 KO cells (control and Synta66 pre-treated)
		X-axis: Time (s), Y-axis: Fluo-4/Fura-Red Ratio; SEM: std.error of mean
													TREM2 KO microglia
			TREM2 KO microglia										SOCE Rate
			Control			Synta66							Control	Synta66
		Time (s)	Mean	SEM		Mean	SEM						column C	column D
		0	0.16461	0.003539		0.145575	0.002901						0	0.00069434			Mann Whitney test
		2	0.163723	0.003447		0.146336	0.003046						0	0			P value	< 0.0001
		4	0.162349	0.003157		0.146299	0.00286						0.00697541	0			Exact or approximate P value?	Approximate
		6	0.162154	0.003167		0.144809	0.002772						0.0179143	0			P value summary	****
		8	0.16186	0.003146		0.144036	0.002718						0.00132198	0			Significantly different? (P < 0.05)	Yes
		10	0.162731	0.003399		0.143544	0.002794						0.00406314	0			One- or two-tailed P value?	Two-tailed
		12	0.162875	0.003538		0.143729	0.002714						0.00415828	0.00039375			Sum of ranks in column C,D	26260 , 12800
		14	0.164213	0.003555		0.142728	0.002718						0.00712557	0			Mann-Whitney U	865
		16	0.164428	0.003682		0.142869	0.002713						0.0404628	0.00030891
		18	0.165166	0.00371		0.144707	0.002839						0.0113776	0.00128333			Difference between medians
		20	0.164208	0.003903		0.146794	0.003097						0.0178358	0.00045755			Median of column C	0.005465
		22	0.163043	0.003797		0.147186	0.003115						0.0252537	0.00039724			Median of column D	0
		24	0.161829	0.003651		0.146943	0.003031						0.00233131	0			Difference: Actual	-0.005465
		26	0.161793	0.003547		0.147384	0.002891						0.00730806	0.00011398			Difference: Hodges-Lehmann	-0.005171
		28	0.162476	0.003397		0.146694	0.002787						0.00993829	0
		30	0.163505	0.003535		0.146333	0.002859						0.00856378	0
		32	0.16399	0.00356		0.146253	0.002964						0.00566607	0
		34	0.16605	0.003636		0.146846	0.003058						0.00608787	0.00047954
		36	0.165513	0.003708		0.147539	0.003199						0.0119811	0
		38	0.165891	0.003656		0.147474	0.003146						0.00189625	0
		40	0.164328	0.003742		0.147591	0.00302						0.00122975	0
		42	0.164906	0.003712		0.147954	0.002974						0.00447606	0
		44	0.164376	0.003959		0.146978	0.002961						0.0088454	0.00032138
		46	0.164191	0.003786		0.14636	0.002902						0.0031671	0
		48	0.163351	0.003787		0.145821	0.002857						0.00250541	4.5823e-05
		50	0.163408	0.003627		0.147473	0.002727						0.00452002	0
		52	0.16274	0.003777		0.148156	0.002802						0.0077999	0
		54	0.163917	0.003643		0.148514	0.002867						0.0251395	0
		56	0.161966	0.003641		0.14677	0.002772						0	0.00061353
		58	0.163028	0.003621		0.147092	0.002748						0.00135295	9.2024e-06
		60	0.162798	0.003819		0.146876	0.002867						0.00900462	0
		62	0.163758	0.003804		0.146563	0.002958						0.00256382	0
		64	0.163536	0.003939		0.146832	0.003156						0.0759856	0
		66	0.163342	0.003999		0.146057	0.00306						0.0284279	0
		68	0.164098	0.003852		0.14702	0.003268						0.00345386	0
		70	0.164198	0.00387		0.146335	0.00296						0.00611869	0
		72	0.164428	0.003882		0.146256	0.003026						0.00409958	0
		74	0.164158	0.003837		0.145355	0.002749						0.0384345	0
		76	0.164678	0.003765		0.143768	0.002741						0.00948484	0.00025894
		78	0.164687	0.00379		0.143493	0.002662						0.00845709	0.00014641
		80	0.16418	0.003636		0.144398	0.002799						0	0.000439
		82	0.163049	0.003741		0.146239	0.002846						0.00610844	0
		84	0.162035	0.003546		0.146876	0.002709						0.0535564	0
		86	0.16136	0.003848		0.146207	0.00273						0.00422086	0
		88	0.162004	0.004011		0.145909	0.002674						0.0209369	0
		90	0.16341	0.004044		0.145387	0.002671						0.0250082	0
		92	0.163711	0.003863		0.145059	0.002849						0.0032001	0
		94	0.163559	0.003615		0.14432	0.002943						0.00927374	0.00059697
		96	0.163565	0.003622		0.144843	0.00314						0.0076594	0.00061718
		98	0.16477	0.00384		0.145821	0.003139						0.00517117	0.00127611
		100	0.164803	0.003724		0.146189	0.003072						0.00445488	0.00099666
		102	0.182134	0.009694		0.147061	0.002807						0.00208445	0.00109617
		104	0.352615	0.041545		0.20991	0.023674						0.00190689	0.00061989
		106	0.646666	0.073266		0.339358	0.049658						0.00583573	0
		108	0.978145	0.088142		0.552679	0.072681						0.0017696	0
		110	1.11581	0.076192		0.74804	0.072529						0.0143896	0.00024945
		112	1.081	0.056469		0.852122	0.060269						0.00271608	0
		114	0.958956	0.038648		0.815765	0.04712						0.00441781	0
		116	0.841491	0.033355		0.674516	0.038548						0.00969188	0
		118	0.746205	0.035796		0.524946	0.030079						0.00022414	0
		120	0.677114	0.038223		0.406936	0.023723						0.00162281	0
		122	0.622622	0.041676		0.322532	0.019637						0.00751497	7.5131e-05
		124	0.570948	0.042619		0.259496	0.014582						0.00589949	0.0010616
		126	0.512754	0.038214		0.216763	0.01						0.00511538	0.00082942
		128	0.459486	0.032797		0.190124	0.006941						0.00324364	0.00012203
		130	0.426048	0.034033		0.173686	0.004679						0.00641519	0.00010873
		132	0.404984	0.040154		0.163926	0.003888						0.00259155	0.00083329
		134	0.392042	0.044622		0.157307	0.003822						0.00788662	0
		136	0.368197	0.042188		0.160783	0.010141						0.0272117	0
		138	0.337919	0.038144		0.164364	0.017639						0.0327472	0.00021664
		140	0.300682	0.031458		0.168727	0.022619						0.00173371	0
		142	0.269864	0.02625		0.163258	0.018768						0	0
		144	0.244633	0.022275		0.158906	0.014202						0.00082119	0.00028589
		146	0.223159	0.018226		0.152952	0.009759						0.00187118	0
		148	0.205614	0.01452		0.148636	0.006547						0	0
		150	0.192485	0.011889		0.144392	0.00409						0.00795485	0.00038427
		152	0.181993	0.009629		0.142577	0.002971						0.00359394	0
		154	0.173189	0.008359		0.140454	0.002524						0.0297531	0
		156	0.165671	0.006884		0.139125	0.002352						0.00965908	0
		158	0.161227	0.006212		0.139344	0.00254						0.00544449	0.00075411
		160	0.159035	0.005866		0.139953	0.002744						0.00546503	0.00079309
		162	0.156988	0.005503		0.139617	0.002771						0.0226624	9.2071e-05
		164	0.154464	0.004897		0.139168	0.002798						0.00505882	0.00018799
		166	0.151876	0.004235		0.139019	0.002754						0.00308652	0.00066039
		168	0.151208	0.004066		0.140887	0.002673						0.00267645	0
		170	0.149819	0.003955		0.141248	0.002445						0.0098494	4.0057e-05
		172	0.148682	0.004012		0.141201	0.002391						0.00013365	0
		174	0.148059	0.004238		0.140125	0.002488						0.00126512	0
		176	0.147999	0.004431		0.13954	0.00255						0.00255419	0.00036961
		178	0.148275	0.0045		0.139271	0.002558						0.00980067	0.00169243
		180	0.146913	0.004256		0.139482	0.002671						0.0795534	0
		182	0.146824	0.004056		0.138916	0.002596						0.00272553	0
		184	0.145697	0.004089		0.14021	0.002925						0.00605279	0.00031475
		186	0.14653	0.004047		0.139757	0.002847						0.00046292	0
		188	0.145617	0.004172		0.140314	0.00284						0.00487426	7.3001e-05
		190	0.145155	0.003803		0.141164	0.002741						0.00408887	0.00063343
		192	0.14391	0.003881		0.142131	0.002811						0.00185593	0
		194	0.144343	0.003734		0.143631	0.002984						0.00221519	0
		196	0.14442	0.003869		0.141754	0.002868						0.00569452	0
		198	0.145017	0.003783		0.141243	0.002843						0.00988947	0
		200	0.14548	0.003897		0.138612	0.002828						0.00300376	0.00067174
		202	0.146386	0.003677		0.139228	0.003018						0.0167834	0
		204	0.146597	0.003892		0.138387	0.002903						0.00620607	0
		206	0.146118	0.003837		0.139332	0.002872						0.00120558	0
		208	0.14545	0.003758		0.13833	0.002718						0.00164336	0
		210	0.145127	0.00349		0.138637	0.002707						0.00071161	0
		212	0.145737	0.003293		0.138555	0.002581						0.00091032	0
		214	0.145947	0.003514		0.138976	0.002611						0.00055608	0.00042166
		216	0.145799	0.00382		0.139359	0.002691						0.0136201	0.00011448
		218	0.14464	0.003838		0.139716	0.002895						0.00787618	0.0001269
		220	0.143666	0.003673		0.139938	0.002878						0.0555038	0.00034285
		222	0.14381	0.003548		0.141175	0.00285						0.00275688	0
		224	0.144641	0.003677		0.140815	0.00256						0.0116409	0
		226	0.145293	0.003689		0.141057	0.002427						0.0863144	0.00018686
		228	0.144561	0.003659		0.13954	0.002433						0.00182525	0.00077115
		230	0.143498	0.003777		0.140954	0.002613						0.00265092	0
		232	0.143686	0.003754		0.14061	0.002751						0.0163722	0
		234	0.143842	0.003784		0.140759	0.002629						0.00746161	0
		236	0.143729	0.00354		0.138954	0.002676						0.00447435	0
		238	0.143843	0.003651		0.138791	0.002597						0.00598734	0.00082934
		240	0.143174	0.003545		0.137195	0.002659						0.01634	1.7568e-05
		242	0.144172	0.003688		0.136525	0.002543						0.00555011	0.00028757
		244	0.143903	0.003619		0.136153	0.002609						0.0291637	0
		246	0.14353	0.003807		0.137835	0.002585						0.00070778	0
		248	0.142616	0.003833		0.138236	0.002456						0.0105054	0
		250	0.142623	0.003802		0.138446	0.002482							0.00026205
		252	0.144663	0.003764		0.138829	0.002559							0
		254	0.150039	0.003402		0.13909	0.00261							0
		256	0.16412	0.005111		0.138711	0.00256							8.2081e-06
		258	0.191115	0.011883		0.138413	0.002449							0
		260	0.222856	0.021189		0.139533	0.002593							0
		262	0.25129	0.029141		0.140875	0.002827							0.00049748
		264	0.270541	0.035652		0.141487	0.002791							0
		266	0.283491	0.039534		0.140258	0.002739							0.00096542
		268	0.294006	0.042608		0.139169	0.002663							0.00026315
		270	0.302465	0.044949		0.137645	0.002879							0
		272	0.309875	0.04744		0.138565	0.002881							0
		274	0.312728	0.049508		0.138269	0.002853							0
		276	0.31826	0.051021		0.139869	0.00281							0
		278	0.320423	0.051087		0.139802	0.002791							0.0004281
		280	0.326868	0.051657		0.141526	0.002847							0.0003805
		282	0.329048	0.051938		0.140165	0.002686							0
		284	0.336089	0.054039		0.141242	0.002814							0
		286	0.341023	0.054492		0.142501	0.002818							0
		288	0.347882	0.05493		0.144588	0.002972							0.00075692
		290	0.355334	0.055086		0.144532	0.002804							0
		292	0.360266	0.05508		0.144486	0.002824							0.00036794
		294	0.362366	0.05493		0.144522	0.002835							5.0903e-05
		296	0.35968	0.053693		0.14369	0.002713							0.00090379
		298	0.360009	0.053507		0.143638	0.002759							0
		300	0.36115	0.053197		0.142402	0.002789							4.4257e-05
														0.00040578
														0
														7.8273e-05

## Sheet: Fig 3 Supp 1 Panel C-D
				Fig. 3-fig.supp. 3C											Fig. 3-fig.supp. 3D (left panel)
																																			Fig. 3-fig.supp. 3D (left panel)
			AverageTrace: 1Ca ADP response in TREM2 KO cells- SOCE inhibitors Gd3+ and 2-APB
			X-axis: Time (s), Y-axis: Fluo-4/Fura-Red Ratio; SEM: std.error of mean												Peak Ca2+ responde to ADP (baseline subtracted)
																																			Cyt Ca2+ at 5 min. (baseline subtracted)
				Control			4mM Gd3+			50mM 2-APB					Control	4mM Gd3+	50mM 2-APB
				Mean	SEM		Mean	SEM		Mean	SEM				KO_con_Peak-BL	KO_Gd_Peak-BL	KO_APB_Peak-BL																		Control	4mM Gd3+	50mM 2-APB
																																			KO_con_5min	KO_Gd_5min	KO_APB_5min
			0	0.158452	0.003515		0.164451	0.004962		0.145306	0.003128				1.53223	1.20809	1.43261
			3	0.16282	0.003444		0.165724	0.003436		0.144211	0.002936				1.3742	1.50919	1.19984																		0.605608	0.035071	0.007827
			6	0.16053	0.00338		0.166565	0.005857		0.143883	0.002998				1.36106	1.5247	1.36353																		0.6997	0	0.091159
			9	0.164308	0.003013		0.167584	0.004371		0.14121	0.003007				1.35828	1.57589	1.42716																		0.513886	0	0.011549
			12	0.160692	0.003426		0.165297	0.003995		0.145296	0.003284				1.29964	1.59374	1.38372																		0.538397	0	0.040918
			15	0.161081	0.003994		0.163953	0.004652		0.14641	0.003298				1.40177	1.47698	1.12996																		0.408352	0.011677	0.055079
			18	0.16815	0.005001		0.167135	0.005339		0.145944	0.003239				1.21871	1.62442	1.19414																		1.04672	0.026286	0.009585
			21	0.16367	0.004071		0.166545	0.004437		0.144353	0.003211				1.27398	1.58577	1.16184																		0.490726	0	0.073984
			24	0.165033	0.004131		0.169495	0.005184		0.143795	0.003111				1.42516	1.4183	0.763324																		0.545692	0	0.033099
			27	0.165302	0.003979		0.168141	0.005082		0.14617	0.00327				1.30337	1.53549	1.38816																		1.08157	0	0.02536
			30	0.170604	0.00437		0.171614	0.00399		0.143757	0.002579				1.41485	1.30806	1.16564																		0.69104	0.004956	0.017168
			33	0.165717	0.003822		0.167083	0.00404		0.143336	0.003024				1.56444	1.19508	1.72033																		0.488108	0.01572	0.057571
			36	0.170385	0.004166		0.168655	0.003826		0.146352	0.003268				1.44817	1.39291	1.54515																		0.395136	0	0.00611
			39	0.169823	0.003405		0.167641	0.004267		0.144774	0.003003				1.36091	1.14611	0.968608																		0.076646	0.000444	0.031102
			42	0.169892	0.003814		0.169425	0.004866		0.14445	0.003138				1.49158	1.35311	0.975239																		0.777807	0.013363	0.013981
			45	0.168349	0.003697		0.167439	0.004311		0.146571	0.003407				1.56864	1.31068	1.50348																		0.488038	0.514245	0.005867
			48	0.16636	0.003265		0.164548	0.004141		0.148516	0.00315				1.5457	1.54998	1.42095																		0.809198	0	0.057072
			51	0.166953	0.003775		0.161904	0.003184		0.14424	0.002987				1.11495	1.22169	1.12585																		0.42964	0.006841	0.054537
			54	0.16666	0.003612		0.166838	0.004494		0.147262	0.003349				1.45124	1.33645	1.47694																		0.340336	0	0.112491
			57	0.165032	0.003555		0.167264	0.004327		0.145189	0.003246				1.41402	1.27451	1.35937																		0.473507	0.175689	0.02228
			60	0.166962	0.003408		0.16461	0.003874		0.147764	0.003411				1.45385	1.41785	1.54055																		0.041186	0	0.017092
			63	0.169211	0.003923		0.165642	0.003922		0.148642	0.003477				1.58269	1.52233	1.35414																		0.43817	0	0.004678
			66	0.164716	0.004224		0.163646	0.005052		0.146948	0.003403				1.27927	1.33352	1.72558																		0.761907	0	0.002304
			69	0.166036	0.004039		0.162405	0.004668		0.145649	0.003415				1.28841	1.50551	1.2347																		0.266872	0.029189	0
			72	0.170765	0.003625		0.160099	0.003818		0.146813	0.003433				1.20324	1.23686	1.61188																		0.221016	0.527531	0.071302
			75	0.169206	0.004026		0.165433	0.003881		0.151097	0.003362				1.18535	1.37748	1.30111																		0.112365	0.149004	0.00031
			78	0.165637	0.003489		0.164417	0.005507		0.145084	0.003244				1.50605	1.07664	1.40056																		0.142749	0.156395	0.025873
			81	0.167513	0.004118		0.16382	0.00366		0.14711	0.003006				1.34058	1.32584	1.52299																		0.603409	0.031092	0
			84	0.169227	0.004392		0.159779	0.003614		0.147057	0.003372				1.48291	1.3064	1.43968																		0.764737	0	0.030256
			87	0.165936	0.003216		0.161287	0.00365		0.144374	0.003145				1.20597	1.26869	1.48101																		0.663152	0.061074	0.00723
			90	0.169291	0.003344		0.161727	0.003321		0.142664	0.003516				1.2891	1.37742	1.72545																		0.243105	0.019326	0.014823
			93	0.529885	0.054197		0.164303	0.003387		0.145626	0.003003				1.45632	1.58646	1.50944																		0.09758	0.020097	0.025121
			96	1.51325	0.020878		0.69424	0.043662		1.17525	0.062148				1.52826	1.57587	1.62316																		0.507848	0.017215	0.018836
			99	1.41661	0.022974		1.52856	0.019005		1.43194	0.033182				1.38721	1.64142	1.31796																		0.657166	0.238109	0.011415
			102	1.26006	0.024537		1.40572	0.020551		1.29497	0.029738				1.43013	1.07538	1.47451																		0.747051	0.091509	0.023556
			105	1.1037	0.024801		1.21913	0.017716		1.04228	0.031724				1.27418	1.34933	0.891979																		0.758372	0.001642	0.01967
			108	1.00481	0.026645		1.04801	0.017494		0.759836	0.028629				1.19012	1.45199	1.1818																		0.400079	0.04043	0.009121
			111	0.971639	0.027671		0.893724	0.017874		0.602207	0.025265				1.58471	1.44388	1.43059																		0.100365	0.398596	0.06025
			114	0.922164	0.027306		0.78712	0.017634		0.535072	0.022355				1.54064	1.41843	1.41247																		0.887385	0	0.01747
			117	0.881177	0.028088		0.715943	0.018028		0.528856	0.023349				1.31576	1.32815	1.32288																		0.335337	0.17679	0.105535
			120	0.869132	0.026525		0.676129	0.018587		0.545183	0.024566				1.42658	1.62273	1.55956																		0.415258	0.018234	0.021487
			123	0.88203	0.027735		0.635192	0.019084		0.570187	0.023392					1.2393	1.48505																		0.731148	0.017439	0.059835
			126	0.892886	0.028292		0.615749	0.020215		0.615623	0.023243					1.39179	1.48127																			0.022641	0.016117
			129	0.89897	0.030932		0.574259	0.019307		0.598819	0.019995					1.34149	1.26364																			0.015502	0.016364
			132	0.917192	0.032568		0.523625	0.016122		0.523555	0.01639					1.5917	1.16856																			0.028234	0.000752
			135	0.910822	0.034052		0.489814	0.01676		0.451593	0.016248					1.56437	1.54847																			0.429849	0.011528
			138	0.931547	0.033639		0.459279	0.015494		0.396591	0.015131					1.48469	1.13684																			0.041356	0.0287
			141	0.929788	0.035653		0.428024	0.015679		0.350928	0.014823					1.3105	0.743538																			0	0.030977
			144	0.926469	0.035795		0.402912	0.015348		0.302736	0.012722					1.42179	1.56006																			0.028016	0.008906
			147	0.916986	0.040416		0.378051	0.014211		0.26617	0.011185					1.31221	1.10891																			0	0.028832
			150	0.915476	0.03853		0.350862	0.013799		0.230192	0.009157					1.25761	0.888188																			0.083401	0.043312
			153	0.906545	0.038775		0.333669	0.014366		0.210438	0.008936					1.29334	1.45381																			0.193626	0
			156	0.897849	0.037187		0.320779	0.016122		0.191841	0.007765					1.49916	1.43712																			0.010843	0.034286
			159	0.897849	0.038414		0.296112	0.015627		0.1775	0.006978					1.49573	1.40225																			0.017737	0.006072
			162	0.881058	0.038571		0.275722	0.013938		0.165522	0.005957					1.60106	1.16671																			0.002469	0.026368
			165	0.87585	0.037899		0.260363	0.014697		0.156713	0.004968					1.19839	1.21762																			0.014368	0
			168	0.850163	0.03713		0.244732	0.013851		0.149878	0.004767					1.29357	1.07429																			0.016667	0.000963
			171	0.850841	0.0386		0.232973	0.013604		0.147466	0.004427					1.42804	1.33509																			0.00485	0
			174	0.837301	0.039462		0.217977	0.013358		0.141453	0.004282					1.41888	1.07383																			0	0.021194
			177	0.831115	0.037304		0.212022	0.012866		0.143161	0.004444					1.40848	0.842866																			0.442837	0.022894
			180	0.819716	0.03919		0.20289	0.013038		0.142516	0.004291					1.43604	1.83968																			0.018683	0.020461
			183	0.821846	0.039407		0.195659	0.01239		0.138714	0.004297					1.64408																				0.188149	0.019766
			186	0.82515	0.040135		0.183693	0.010842		0.141076	0.004272					0.907529																				0.074758
			189	0.827071	0.038517		0.177393	0.010291		0.141649	0.004344					1.44818																				0
			192	0.830365	0.041306		0.172548	0.010024		0.140761	0.00409					1.53205																				0.026136
			195	0.807509	0.039534		0.167748	0.009473		0.138024	0.00425					1.47188																				0.460569
			198	0.807969	0.040849		0.162079	0.008444		0.138276	0.004034					1.29499																				0.005089
			201	0.806436	0.040181		0.161548	0.008762		0.140033	0.004506					1.43362																				0.016726
			204	0.801847	0.039916		0.15783	0.007773		0.139654	0.004403					1.27538																				0.007658
			207	0.790261	0.039374		0.153779	0.007451		0.141741	0.004459					1.47855																				0.004489
			210	0.797179	0.039403		0.150194	0.006795		0.141783	0.004299					1.33063																				0.008051
			213	0.792981	0.039761		0.147439	0.006578		0.139004	0.004105					1.3671																				0
			216	0.784306	0.038269		0.146933	0.006209		0.138708	0.004268					1.14405																				0
			219	0.778583	0.04137		0.142612	0.005764		0.138845	0.003943					1.55381																				0.033749
			222	0.773216	0.038577		0.141355	0.005878		0.137836	0.004045																									0.012629
			225	0.784284	0.039523		0.142622	0.005441		0.140875	0.00425
			228	0.774871	0.038173		0.13894	0.005583		0.14145	0.004257
			231	0.779613	0.037835		0.137807	0.0049		0.139397	0.004136
			234	0.770161	0.037387		0.138604	0.004644		0.140857	0.003884
			237	0.768032	0.039612		0.14014	0.004802		0.14223	0.004247
			240	0.743868	0.036496		0.141265	0.004466		0.143694	0.004182
			243	0.740961	0.035577		0.137496	0.004129		0.142244	0.004088
			246	0.754699	0.038082		0.139826	0.004428		0.144181	0.004554
			249	0.740825	0.035799		0.140874	0.004846		0.14643	0.004748
			252	0.749544	0.035848		0.140809	0.006031		0.146203	0.006044
			255	0.740868	0.03644		0.144867	0.009602		0.146742	0.005975
			258	0.746539	0.0367		0.148131	0.010489		0.143167	0.005021
			261	0.729636	0.034361		0.145842	0.010159		0.145488	0.004398
			264	0.728152	0.036068		0.146659	0.009716		0.1457	0.004564
			267	0.731109	0.038637		0.145266	0.008738		0.144841	0.004183
			270	0.718467	0.03533		0.145785	0.008719		0.144515	0.004073
			273	0.700701	0.036687		0.143391	0.008233		0.145036	0.004197
			276	0.698609	0.038522		0.14698	0.008371		0.144705	0.004245
			279	0.700362	0.040546		0.142659	0.008097		0.144282	0.004277
			282	0.701032	0.040057		0.146218	0.008499		0.144003	0.004109
			285	0.693052	0.040882		0.156131	0.011955		0.143005	0.003974
			288	0.675098	0.037715		0.154719	0.011314		0.142562	0.00398
			291	0.677774	0.039237		0.155114	0.011595		0.143816	0.004321
			294	0.683649	0.039381		0.157206	0.012442		0.146132	0.004237
			297	0.659267	0.039077		0.159907	0.012642		0.145382	0.004316
			300	0.660448	0.040265		0.158346	0.011659		0.144867	0.004159
			303	0.669195	0.039978		0.156994	0.010787		0.143405	0.004271
			306	0.672599	0.040528		0.156327	0.009971		0.149469	0.004459
			309	0.671709	0.041521		0.159074	0.011057		0.145164	0.004163
			312	0.677379	0.042625		0.1613	0.011018		0.149195	0.004215
			315	0.668593	0.043082		0.161467	0.010715		0.147619	0.004554
			318	0.677451	0.0431		0.162258	0.010925		0.146623	0.004234
			321	0.684171	0.045096		0.164693	0.011228		0.147275	0.004176
			324	0.662541	0.042558		0.175247	0.012157		0.146685	0.004265
			327	0.6573	0.042462		0.173208	0.013376		0.147945	0.004128
			330	0.663866	0.042132		0.177448	0.01298		0.144911	0.003945
			333	0.660549	0.041759		0.175053	0.013336		0.146878	0.004183
			336	0.66811	0.041372		0.176393	0.012897		0.15	0.004238
			339	0.664247	0.041865		0.174861	0.012571		0.147898	0.004299
			342	0.653274	0.042966		0.173802	0.011376		0.150039	0.004369
			345	0.663553	0.041558		0.171892	0.011097		0.147821	0.004318
			348	0.667395	0.041781		0.172774	0.01046		0.149247	0.004328
			351	0.66504	0.041404		0.170994	0.010332		0.149546	0.004606
			354	0.660306	0.040118		0.169335	0.00953		0.147197	0.004271
			357	0.657916	0.040876		0.169055	0.009163		0.148661	0.004484
			360	0.672606	0.040389		0.17255	0.010874		0.149169	0.004286
			363	0.665157	0.038367		0.172986	0.011834		0.147919	0.004131
			366	0.675968	0.040876		0.17474	0.011586		0.146581	0.00411
			369	0.671461	0.04054		0.175556	0.010535		0.148416	0.004519
			372	0.674218	0.039904		0.177132	0.010229		0.153429	0.004587
			375	0.661298	0.041223		0.190477	0.012463		0.153838	0.004159
			378	0.664134	0.0421		0.195187	0.013974		0.150447	0.004316
			381	0.658967	0.041614		0.204938	0.015432		0.150637	0.004314
			384	0.657487	0.041589		0.210679	0.017448		0.149133	0.004177
			387	0.650164	0.041765		0.208679	0.016308		0.151369	0.004144
			390	0.648569	0.041593		0.208912	0.016191		0.150027	0.004197
			393	0.650433	0.042354		0.211877	0.016278		0.150121	0.004379
			396	0.641442	0.043033		0.221442	0.017509		0.150076	0.004374
			399	0.633164	0.041928		0.236354	0.019083		0.150164	0.004146
			402	0.638312	0.042649		0.234594	0.01825		0.146804	0.004284
			405	0.648335	0.045072		0.241877	0.020103		0.150006	0.004296
			408	0.631589	0.042182		0.241383	0.019582		0.152625	0.004465
			411	0.633972	0.04229		0.241222	0.018469		0.151733	0.004259
			414	0.652617	0.043028		0.249941	0.01999		0.151341	0.004601
			417	0.639622	0.041817		0.250844	0.019473		0.151999	0.004145
			420	0.61864	0.040056		0.245853	0.017677		0.150773	0.004392
			423	0.605706	0.043131		0.256748	0.018903		0.154377	0.004238
			426	0.622561	0.042282		0.264942	0.020076		0.154689	0.004487
			429	0.658015	0.044418		0.271989	0.0217		0.148755	0.004507
			432	0.65274	0.042568		0.268437	0.020014		0.149457	0.004344
			435	0.648452	0.042335		0.263206	0.019575		0.152406	0.004642
			438	0.633216	0.041765		0.260821	0.019208		0.151099	0.004702
			441	0.625548	0.041665		0.26068	0.02022		0.152561	0.004554
			444	0.625708	0.04058		0.255335	0.018717		0.153277	0.004684
			447	0.629456	0.039288		0.254453	0.018054		0.153589	0.004278
			450	0.627529	0.040791		0.251526	0.01736		0.152872	0.004468
			453	0.622575	0.041591		0.254838	0.018099		0.150562	0.004403
			456	0.614272	0.040591		0.251868	0.018297		0.152217	0.004804
			459	0.625946	0.041999		0.247441	0.01771		0.153902	0.004679
			462	0.622158	0.040706		0.240438	0.016932		0.15171	0.004104
			465	0.605098	0.0404		0.234212	0.015581		0.153733	0.004414
			468	0.601475	0.042463		0.230548	0.015061		0.155866	0.004274
			471	0.613168	0.042384		0.227121	0.014571		0.153834	0.00425
			474	0.603787	0.042712		0.216338	0.013206		0.156085	0.004645
			477	0.596911	0.043435		0.213043	0.013079		0.159503	0.004541
			480	0.590018	0.043651		0.216048	0.014985		0.158094	0.004685
			483	0.590349	0.044713		0.209323	0.013316		0.155514	0.004526
			486	0.577271	0.043759		0.202469	0.011792		0.155818	0.004562
			489	0.584462	0.044355		0.203261	0.013337		0.154478	0.0045
			492	0.569606	0.042492		0.199121	0.012158		0.156509	0.004469
			495	0.573313	0.043773		0.19884	0.012279		0.158113	0.004314
			498	0.557592	0.044349		0.197642	0.012486		0.157451	0.004417
			501	0.562441	0.043712		0.194441	0.011349		0.157115	0.004654
			504	0.570745	0.04428		0.201906	0.012351		0.160843	0.004673
			507	0.561339	0.043572		0.208399	0.015962		0.156668	0.004319
			510	0.570177	0.043916		0.204949	0.014261		0.158902	0.004741
			513	0.57383	0.043444		0.207343	0.015114		0.156349	0.004762
			516	0.575787	0.044719		0.208645	0.016204		0.159437	0.004555
			519	0.559387	0.0438		0.207502	0.015466		0.158403	0.004877
			522	0.551178	0.043742		0.206856	0.015444		0.159911	0.004413
			525	0.541478	0.041841		0.216568	0.017682		0.159826	0.004736
			528	0.563746	0.04445		0.226645	0.019563		0.16038	0.004767
			531	0.570887	0.04511		0.221223	0.017504		0.161763	0.004575
			534	0.57002	0.043291		0.224953	0.018727		0.158157	0.004576
			537	0.570588	0.043175		0.22697	0.018999		0.156685	0.004723
			540	0.582097	0.043158		0.221166	0.017774		0.157714	0.004399
			543	0.582553	0.043414		0.214113	0.01643		0.158652	0.004885
			546	0.575532	0.042529		0.212951	0.015984		0.15322	0.004335
			549	0.578283	0.042109		0.213425	0.016145		0.155739	0.004799
			552	0.575436	0.043826		0.210929	0.015278		0.158291	0.004706
				0.5771	0.041153		0.204866	0.01363		0.157843	0.004545
				0.577394	0.042824		0.204854	0.01341		0.158086	0.004721
				0.58184	0.042969		0.205528	0.013375		0.160123	0.004559
				0.583224	0.042906		0.200673	0.012644		0.159252	0.004959
				0.588074	0.041935		0.198906	0.01271		0.159325	0.004656
				0.583492	0.042151		0.198022	0.012645		0.156398	0.004657
				0.587098	0.041719		0.202137	0.013931		0.159915	0.004607
				0.590033	0.042678		0.197375	0.013619		0.160297	0.004669
				0.599676	0.042703		0.194374	0.01291		0.157562	0.004488
				0.586514	0.042243		0.195002	0.012706		0.160201	0.004783
				0.572461	0.043791		0.191774	0.012696		0.15579	0.00503
				0.572991	0.042701		0.191216	0.012345		0.159544	0.004828
				0.561615	0.043144		0.191041	0.011659		0.161846	0.004649
				0.550452	0.041054		0.187711	0.012717		0.163136	0.004978
				0.546173	0.041364					0.161515	0.004637
				0.547241	0.041185					0.160593	0.004691
				0.550198	0.042495					0.159118	0.004804
				0.540255	0.042454					0.163899	0.004917
				0.537304	0.043694					0.164563	0.005257
				0.525846	0.042931					0.163122	0.004847
				0.535735	0.044348					0.165527	0.005063
				0.532236	0.041929					0.16404	0.005106
				0.522582	0.04424					0.164887	0.004606
				0.508791	0.043474					0.16447	0.004829
				0.526238	0.042766					0.164063	0.005223
				0.529032	0.042374					0.16486	0.005088
				0.515527	0.039908					0.164441	0.005035
				0.519934	0.039277					0.160797	0.005374
				0.530535	0.0403					0.165215	0.005156
				0.532089	0.038694					0.160263	0.005056
				0.535745	0.03846					0.166566	0.005218
				0.534894	0.038431					0.16903	0.005115
				0.534867	0.036904					0.172692	0.005295
				0.553942	0.037953					0.170348	0.005048
				0.571647	0.03952					0.170689	0.005394
				0.566936	0.037743					0.167239	0.005114
										0.167853	0.005059
										0.166528	0.005155
										0.170581	0.005185
										0.167551	0.005049
										0.167759	0.005656
										0.170046	0.0058
										0.169082	0.005409
										0.166675	0.005548
										0.168071	0.005529
										0.167337	0.004937
										0.168238	0.005343
										0.167064	0.00535
										0.169295	0.005198
										0.168846	0.005815
										0.167656	0.005159
										0.16747	0.005287
										0.171712	0.005543
										0.168543	0.005638
										0.167864	0.005481
										0.164717	0.005107
										0.172975	0.00579
										0.172475	0.006651
										0.171438	0.00572
										0.167628	0.005304
										0.17375	0.006883
										0.168691	0.005584
										0.168921	0.005088
										0.170112	0.005938
										0.171772	0.005153
										0.174745	0.006819
										0.172708	0.006145
										0.168488	0.005302
										0.169241	0.006135

[truncated: 5 more sheets: Fig 3 Sup 1 Panel E, Fig 3 Supp 1 Panel F, Fig 3 Supp 2 Panels A-B, Fig 3 Supp 2 Panel D, Fig 3 Supp 2 Panels E-F]
