# Supplementary material for: TREM2 regulates purinergic receptor-mediated calcium signaling and motility in human iPSC-derived microglia
Source: eLife. 2022 Feb 22;11:e73021. doi: 10.7554/eLife.73021 (PMC8906810; doi:10.7554/eLife.73021)
Supplement: Figure 4—source data 1. — In this dataset, the results of motility experiments and process extension in WT cells are included. [file elife-73021-fig4-data1.xlsx]

## Sheet: Figure 4A
Figure 4 A
Time (hours)	Untreated			10 uM ADP
0	0	0	0	0	0	0
0.5	-0.077	0.619	1.183	0.381	-0.87	-0.534
1	-0.219	0.116	0.406	1.585	-0.111	1.065
1.5	0.14	-0.012	-0.328	3.346	1.1	1.108
2	-0.041	0.18	-0.608	3.522	1.299	2.388
2.5	0.557	0.362	0.488	4.363	2.329	2.374
3	0.75	0.532	1.02	4.349	2.624	3.718
3.5	1.296	1.179	1.108	5.01	3.095	4.057
4	1.103	1.104	1.514	5.23	3.119	5.098
4.5	1.115	1.214	1.265	5.204	3.303	5.711
5	1.708	1.394	1.82	5.215	3.954	5.469
5.5	2.363	1.673	1.898	5.722	3.507	5.918
6	1.779	0.497	1.768	5.802	3.674	5.811
6.5	2.002	1.152	1.8	6.102	3.728	5.873
7	2.053	1.301	2.257	6.015	4.229	5.975
7.5	3.008	1.638	2.182	5.677	3.65	5.418
8	2.817	1.422	2.466	5.569	3.285	5.58
8.5	4.292	2.639	2.73	5.796	3.161	5.385
9	3.953	2.107	2.427	5.792	2.78	5.27
9.5	3.913	2.83	2.382	5.922	3.111	5.216
10	3.8	2.038	2.905	5.275	2.508	5.367
10.5	4.234	2.815	2.781	5.974	2.687	4.339
11	4.665	3.503	3.235	6.018	1.64	4.284
11.5	5.266	3.238	3.159	6.302	2.14	4.236
12	4.321	3.062	3.527	6.539	2.422	3.81
12.5	4.883	3.131	3.324	6.436	2.629	3.455
13	5.252	3.384	3.056	6.232	2.701	4.205
13.5	5.567	3.137	3.781	6.5	2.568	3.714
14	4.458	2.909	4.162	6.689	2.664	3.855
14.5	4.169	1.925	3.844	7.017	3.12	3.723
15	3.822	1.769	3.518	6.747	3.242	4.025
15.5	5.074	2.301	4.998	6.649	3.642	3.077
16	4.711	2.205	3.771	7.222	3.283	3.313
16.5	5.746	3.115	4.867	6.881	3.386	3.73
17	3.676	0.732	1.54	5.267	1.102	2.401
17.5	5.605	3.091	4.282	8.016	3.523	3.283
18	3.42	0.567	1.792	5.442	1.177	2.432
18.5	3.659	0.327	1.589	5.582	1.253	2.751
19	3.331	-0.186	1.713	6.247	1.501	2.469
19.5	3.347	-0.475	1.314	5.336	2.388	2.563
20	3.371	0.58	1.965	6.52	3.254	3.249

## Sheet: Figure 4C
Track Speed				Displacement				Track Straightness
No ADP	2p5uM ADP			No ADP	2p5uM ADP			No ADP	2p5uM ADP
4.21842	4.93791			8.89519	4.04024			0.21	0.08
4.07927	5.13087			0.514798	31.3037			0.01	0.61
4.33562	6.5388			1.74178	12.9807			0.04	0.2
6.78954	4.90245			37.4864	16.0071			0.55	0.33
5.89172	5.04547			5.26765	3.18528			0.09	0.06
8.736	2.95649			74.4789	0.766811			0.85	0.03
8.09268	6.1791			11.0392	9.11853			0.14	0.15
5.5121	6.91872			5.68939	1.75151			0.1	0.03
3.44763	2.77609			3.0866	0.997562			0.09	0.04
2.45715	8.46654			4.78209	4.0083			0.19	0.05
4.91574	5.26113			1.74358	14.1294			0.04	0.27
2.97667	7.00266			1.53755	18.8746			0.05	0.27
6.19806	6.10296			4.17776	17.4498			0.07	0.29
4.25512	4.16373			3.55454	5.39261			0.08	0.13
4.19423	5.29639			1.97545	1.54038			0.05	0.03
4.44199	13.1688			10.0502	3.64654			0.23	0.03
4.59806	9.11706			4.26942	12.322			0.09	0.14
3.56698	6.03744			4.44114	22.5923			0.12	0.37
10.0447	3.75762			4.10658	1.73059			0.04	0.05
8.2437	5.23972			21.6979	1.51682			0.26	0.03
6.7398	4.58837			10.6916	8.93808			0.16	0.19
10.7768	10.259			29.9635	40.4108			0.28	0.39
6.60594	5.7523			4.48466	2.05172			0.07	0.04
5.15722	6.4059			8.56854	5.53319			0.17	0.09
3.15305	4.78075			1.26446	6.73604			0.04	0.14
7.7628	8.01066			10.7704	6.64564			0.14	0.08
7.65774	8.1258			3.0828	3.99302			0.04	0.05
8.75226	4.04858			15.0736	3.82211			0.17	0.09
3.65368	3.58305			2.55308	2.13092			0.07	0.06
9.07284	6.33774			28.9362	7.20227			0.32	0.11
6.75426	7.93416			15.0049	9.72834			0.22	0.12
4.7158	6.57408			1.32412	0.737539			0.03	0.01
9.33078	6.02178			0.307576	31.6298			0	0.53
9.63156	3.34295			10.9248	6.46514			0.11	0.19
4.44701	6.8313			4.60614	6.30965			0.1	0.09
2.94281	5.96264			1.30194	0.573544			0.04	0.01
5.22877	5.99077			3.50649	2.51656			0.07	0.04
8.81592	4.02919			17.5049	1.53074			0.2	0.04
5.30744	7.68342			23.1961	0.422829			0.44	0.01
2.18015	6.51072			1.49829	6.65228			0.07	0.1
7.11858	3.07555			11.94	1.17532			0.17	0.04
4.38214	8.15034			2.48766	1.21449			0.06	0.01
3.75756	4.69989			2.37333	1.86168			0.06	0.04
5.96046	6.62292			22.9892	0.85522			0.39	0.01
3.69191	3.60796			1.26537	4.52508			0.03	0.13
3.67721	8.14314			3.04232	14.8619			0.08	0.18
7.66542	11.1396			19.4872	14.2416			0.25	0.13
3.5488	4.51657			2.56855	1.90722			0.07	0.04
7.13268	4.19198			2.99462	2.22236			0.04	0.05
3.40668	9.42354			2.71591	0.873726			0.08	0.01
2.8765	10.4094			5.58606	3.19023			0.19	0.03
3.36682	8.81706			3.07928	14.4582			0.09	0.16
2.80981	5.38792			1.09695	4.4555			0.04	0.08
3.55427	5.66584			0.85356	3.2156			0.02	0.06
3.69735	6.4896			19.5377	8.23647			0.53	0.13
6.93732	5.42548			0.987928	9.83786			0.01	0.18
1.22095	7.08444			0.237513	0.900274			0.02	0.01
2.75095	4.71892			2.01939	2.3385			0.07	0.05
7.12572	6.74694			3.8724	3.8666			0.05	0.06
3.63006	6.66864			2.23148	12.1683			0.06	0.18
5.69689	6.66492			4.53519	18.5067			0.08	0.28
4.16153	5.46331			15.4744	6.20664			0.37	0.11
4.63728	12.9025			1.7205	18.1342			0.04	0.14
3.25015	9.77226			0.506241	4.7356			0.02	0.05
7.16922	10.2628			25.6717	1.10213			0.36	0.01
4.6874	2.14415			0.840941	1.30392			0.02	0.06
4.48501	12.4419			1.74169	26.8287			0.04	0.22
3.74521	4.30319			1.06124	3.38386			0.03	0.08
5.11986	7.2228			14.3989	9.83254			0.28	0.14
6.71274	4.72752			8.83603	0.858787			0.13	0.02
4.78287	6.05736			3.07974	5.55752			0.06	0.09
4.44398	5.86675			1.38986	2.47597			0.03	0.04
5.8509	7.86648			4.44602	16.4439			0.08	0.21
6.67986	5.5959			7.12036	7.31269			0.11	0.13
6.8232	6.26202			3.52386	3.92346			0.05	0.06
3.0833	7.9278			0.598927	31.5948			0.02	0.4
6.38448	9.22332			9.88138	7.43166			0.15	0.08
3.8682	9.3501			2.78557	5.43012			0.07	0.06
6.78492	11.4143			15.742	30.1998			0.23	0.26
12.6818	1.9962			25.2274	1.29887			0.2	0.07
4.4663	6.87924			4.12998	0.643666			0.09	0.01
3.79867	4.17336			4.85901	4.10918			0.13	0.1
4.83069	5.78498			12.8154	9.05622			0.27	0.16
4.00754	5.90164			9.83894	29.5217			0.25	0.5
4.38509	5.76902			5.38303	1.73331			0.12	0.03
4.12086	3.20025			0.311185	1.2237			0.01	0.04
5.80957	4.34137			7.6046	3.2697			0.13	0.08
13.4577	5.48869			7.40881	3.92036			0.06	0.07
4.14598	5.47886			3.55074	5.35226			0.09	0.1
4.85589	8.23818			4.70622	13.1986			0.1	0.16
3.62145	9.68658			2.04872	7.94174			0.06	0.08
3.42742	6.93366			1.5387	1.55068			0.04	0.02
3.53548	8.66676			2.37487	12.6543			0.07	0.15
8.67708	8.46048			44.4554	68.1712			0.51	0.81
7.03632	5.02606			4.30008	3.94761			0.06	0.08
5.54652	13.9679			3.8407	11.1247			0.07	0.08
4.30128	4.84515			1.53278	7.57075			0.04	0.16
8.75658	8.48256			22.9052	25.5263			0.26	0.3
5.36299	6.16452			3.11877	25.1664			0.06	0.41
5.6433	3.7886			3.7127	5.03056			0.07	0.13
4.898	8.08188			11.1536	6.09038			0.23	0.08
8.45004	7.45014			19.3076	4.53037			0.23	0.06
10.4008	3.6308			38.1803	4.58872			0.37	0.13
4.74064	3.89701			0.849027	6.60864			0.02	0.17
4.237	4.38498			8.49131	6.5234			0.2	0.15
3.10775	3.12173			1.6073	8.21592			0.05	0.26
3.03578	4.89694			10.8003	0.62752			0.36	0.01
7.16172	5.52724			0.97754	1.57157			0.01	0.03
8.99046	9.96156			16.9159	9.45052			0.19	0.09
2.81914	8.70828			1.54712	46.271			0.05	0.53
5.18218	8.93814			18.4343	1.98023			0.36	0.02
6.64446	3.71803			12.2431	2.34996			0.18	0.06
4.77707	4.10299			3.53757	3.25878			0.07	0.08
3.66545	2.85413			0.662503	1.40878			0.02	0.05
3.47856	8.41914			2.88183	4.97005			0.08	0.06
4.44226	5.9316			1.3623	4.46345			0.03	0.08
1.32236	4.75449			0.463753	7.45074			0.04	0.16
5.52497	6.70776			7.95281	7.38326			0.14	0.11
7.87494	11.3008			25.4986	5.24424			0.32	0.05
2.13459	8.93442			12.4586	4.2381			0.58	0.05
5.7435	4.87235			1.43368	0.534092			0.02	0.01
3.13646	3.83774			0.952347	7.6545			0.03	0.2
5.48948	3.81491			1.13698	1.86836			0.02	0.05
2.50566	6.22044			1.77258	18.8621			0.07	0.3
4.4224	7.06158			5.53864	0.011759			0.13	0
5.33244	5.00381			3.14113	3.70648			0.06	0.07
3.2064	3.11573			5.34186	1.80023			0.17	0.06
7.22838	13.5098			16.8194	14.8741			0.23	0.11
5.54143	6.1359			7.88494	5.121			0.14	0.08
3.3014	5.19058			4.53997	6.34489			0.14	0.12
4.62867	6.04146			15.4135	4.46161			0.33	0.07
7.1016	7.1355			1.2267	17.1657			0.02	0.24
4.18497	3.32609			0.469376	3.0514			0.01	0.09
3.66364	4.22026			5.0811	4.29105			0.14	0.1
6.60048	6.28074			26.7437	2.7767			0.41	0.04
4.66399	3.09691			0.71734	1.41204			0.02	0.05
3.73848	4.46213			7.54169	5.7727			0.2	0.13
5.91562	4.34587			1.8872	8.36408			0.03	0.19
5.59161	3.78377			5.83389	4.77688			0.1	0.13
4.38305	11.888			1.15823	8.22598			0.03	0.07
6.74796	9.18438			21.3914	3.2916			0.32	0.04
5.08119	5.10408			7.98236	3.69852			0.16	0.07
6.68136	3.73058			5.20906	9.33636			0.08	0.25
3.92977	18.9276			3.43269	114.387			0.09	0.6
3.62884	5.90675			0.605797	1.22812			0.02	0.02
8.66742	4.61863			4.19315	11.295			0.05	0.24
4.89781	7.82388			6.89031	10.4296			0.14	0.13
2.31364	2.7054			2.60464	0.601574			0.11	0.02
9.29766	6.53088			24.0163	7.20062			0.26	0.11
10.4026	5.8972			49.9809	4.11922			0.48	0.07
3.24958	9.13374			1.30324	12.5891			0.04	0.14
5.38571	3.78746			4.7356	2.98582			0.09	0.08
3.09691	4.44686			0.057375	4.89038			0	0.11
5.08581	8.72742			6.64662	1.87746			0.13	0.02
3.50693	8.78466			2.76552	6.50544			0.08	0.07
5.53137	9.17652			18.3991	12.2297			0.33	0.13
8.60232	4.49075			13.9281	5.62564			0.16	0.13
3.55874	5.84944			0.134981	10.5102			0	0.18
4.94219	3.62105			3.29566	1.07965			0.07	0.03
2.5409	6.27966			0.285812	13.1237			0.01	0.21
7.02774	6.95898			15.6197	23.9874			0.22	0.34
2.71084	2.52418			1.06828	0.888622			0.04	0.04
3.83393	5.86382			10.5689	1.73714			0.28	0.03
4.65175	14.3424			2.13548	34.3756			0.05	0.24
3.12821	4.98686			9.42459	1.48112			0.3	0.03
6.83004	11.5187			4.96849	11.2792			0.07	0.1
4.67959	12.6908			21.338	17.3711			0.46	0.14
10.485	4.5418			6.07693	4.7115			0.06	0.1
5.30615	5.79551			4.1131	0.417126			0.08	0.01
4.44734	7.41156			7.75423	8.63478			0.17	0.12
5.93348	6.52908			8.82433	12.0286			0.15	0.18
2.09349	5.54046			0.479573	2.0318			0.02	0.04
3.35536	4.3864			0.199303	9.242			0.01	0.21
3.72808	4.2518			1.95561	2.8881			0.05	0.07
3.4765	7.15224			0.811282	4.69634			0.02	0.07
6.7581	9.36144			3.10239	12.8682			0.05	0.14
3.6859	3.88291			1.58001	10.8429			0.04	0.28
4.23593	8.00622			1.3905	1.90889			0.03	0.02
4.73634	7.3578			2.4351	33.0679			0.05	0.45
4.01764	4.70537			0.155175	1.14914			0	0.02
7.99662	5.32877			36.9818	3.2257			0.46	0.06
5.88724	16.508			8.2352	6.49366			0.14	0.04
6.80946	5.09545			13.4192	6.50936			0.2	0.13
4.3393	4.33736			1.17986	1.11246			0.03	0.03
4.71684	4.5397			4.03937	3.73746			0.09	0.08
3.73489	5.64942			5.22287	46.2197			0.14	0.82
3.61946	4.3589			1.41502	4.0116			0.04	0.09
2.67101	8.0022			3.16832	7.96153			0.12	0.1
3.73772	5.72545			0.729122	20.0909			0.02	0.35
5.44886	8.08902			1.96601	28.5038			0.04	0.35
3.47834	4.85527			4.36808	0.696169			0.13	0.01
8.18304	6.19566			24.375	14.48			0.3	0.23
4.91491	4.21573			3.98801	10.4234			0.08	0.25
6.90384	3.00803			8.96165	2.58914			0.13	0.09
11.8024	4.12295			49.7243	5.36326			0.42	0.13
4.41139	6.40458			3.41607	3.21483			0.08	0.05
8.40858	13.0012			13.8535	63.4914			0.16	0.49
2.20765	4.41343			0.546526	5.70818			0.02	0.13
7.67916	5.83408			2.65788	4.62684			0.03	0.08
5.38544	6.67092			0.35553	2.07608			0.01	0.03
2.8433	5.43341			1.07727	2.6842			0.04	0.05
10.6223	5.41922			28.6267	6.18187			0.27	0.11
5.07385	4.88479			4.95394	11.3821			0.1	0.23
6.51744	8.09784			4.8134	0.412288			0.07	0.01
8.64504	3.96045			32.9796	5.21984			0.38	0.13
2.79767	3.60834			2.64446	2.53406			0.09	0.07
6.7959	11.9574			0.93012	58.28			0.01	0.49
6.8229	6.24546			41.1117	1.32499			0.6	0.02
3.01072	5.12789			6.59705	11.2236			0.22	0.22
11.7676	6.08652			16.582	2.82364			0.14	0.05
7.89264	1.81609			46.0735	0.222074			0.58	0.01
5.95435	7.48386			24.6267	11.391			0.41	0.15
6.66468	4.89904			2.53727	5.68572			0.04	0.12
2.43171	5.07129			2.55636	1.22977			0.11	0.02
8.40036	10.745			19.1906	11.3287			0.23	0.11
5.07272	7.14732			14.0155	4.87958			0.28	0.07
3.7378	7.05246			1.19155	5.76772			0.03	0.08
4.41445	6.20406			1.99456	6.65571			0.05	0.11
6.75636	8.47614			4.85666	28.1301			0.07	0.33
4.84375	1.62884			4.64735	0.234582			0.1	0.01
5.63047	8.28006			2.5934	17.4483			0.05	0.21
10.5916	5.61498			19.3759	5.40641			0.18	0.1
8.13	14.2526			10.3433	13.862			0.13	0.1
3.67947	12.3086			3.34728	15.4929			0.09	0.13
6.7734	9.99312			7.05742	0.875456			0.1	0.01
5.30972	4.5217			7.29595	1.90118			0.14	0.04
7.81692	5.19627			18.7134	6.0788			0.24	0.12
3.9714	5.95252			9.4449	10.6034			0.24	0.18
4.62917	9.14634			7.43899	13.9346			0.16	0.15
2.6861	7.2393			0.681745	6.0172			0.03	0.08
8.46342	11.1916			3.87395	57.6918			0.05	0.52
10.2749	7.91676			1.44711	7.02619			0.01	0.09
8.85156	4.06535			3.26777	4.02696			0.04	0.1
5.3715	6.32904			3.6018	25.7558			0.07	0.41
8.78562	5.09033			52.6132	2.62541			0.6	0.05
5.82163	10.1541			10.1898	13.8592			0.18	0.14
6.72234	9.75576			41.8077	3.15055			0.62	0.03
5.62842	10.6864			18.4252	10.7929			0.33	0.1
3.89452	7.18644			2.31854	27.4559			0.06	0.38
4.42922	12.0556			9.41459	5.9462			0.21	0.05
5.99317	3.79508			15.1582	5.92263			0.25	0.16
9.1611	6.69858			10.2787	12.9064			0.11	0.19
12.6557	10.789			86.0069	5.46603			0.68	0.05
7.39074	5.49661			6.36805	13.1355			0.09	0.24
3.95266	3.53485			2.19668	19.7312			0.06	0.56
3.10336	15.6377			7.49024	32.9171			0.24	0.21
2.90529	9.57294			5.44928	3.65206			0.19	0.04
5.89793	6.95508			4.47759	22.7481			0.08	0.33
6.69768	6.3576			9.11804	3.90168			0.14	0.06
8.21448	6.13578			0.876863	4.55173			0.01	0.07
6.50754	4.91509			2.28098	33.3223			0.04	0.68
9.8433	8.57718			0.942849	28.0005			0.01	0.33
8.55288	7.71942			67.5703	18.2954			0.79	0.24
7.84482	13.1195			23.5911	10.3819			0.3	0.08
3.78404	9.34056			15.8775	39.6109			0.42	0.42
5.97099	12.883			3.86462	37.245			0.06	0.29
11.4435	9.60744			19.7445	9.24966			0.17	0.1
4.38624	10.3529			8.70658	31.8709			0.2	0.31
7.57962	7.3089			21.7326	29.2294			0.29	0.4
12.0707	13.2913			41.6317	22.5018			0.34	0.17
5.8064	10.6385			9.04705	53.5217			0.16	0.5
8.10942	8.1804			22.3266	1.3431			0.28	0.02
6.4557	7.58946			1.99532	40.9288			0.03	0.54
4.11312	6.7839			11.8717	4.28177			0.29	0.06
5.83883	4.77674			14.6108	2.13838			0.25	0.04
2.55196	11.1529			2.06196	7.70289			0.08	0.07
6.21972	4.86801			16.9832	10.8067			0.27	0.22
6.6663	8.32974			11.3975	47.1381			0.17	0.57
9.49752	4.28603			45.9167	8.46453			0.48	0.2
3.29802	4.71494			5.03855	0.284519			0.15	0.01
3.49152	10.9243			8.81613	1.2698			0.25	0.01
4.52595	9.57444			10.0065	1.21593			0.22	0.01
3.49972	10.3142			11.457	31.4203			0.33	0.3
5.29008	13.0709			9.30278	27.8554			0.18	0.21
2.85616	6.24588			1.50267	4.31815			0.05	0.07
10.3694	7.1754			14.9119	16.6137			0.14	0.23
6.34446	10.1102			7.37593	9.30786			0.12	0.09
2.66036	9.2418			4.9739	20.6225			0.19	0.22
4.86089	5.631			1.08544	16.1173			0.02	0.29
6.6408	7.69314			18.4138	8.84591			0.28	0.11
6.92334	5.92627			10.8916	5.73378			0.16	0.1
7.72452	8.12094			23.3557	23.6925			0.3	0.29
4.08008	5.99652			3.8267	16.0854			0.09	0.27
7.74744	13.5239			16.5196	51.2654			0.21	0.38
8.04018	9.00546			7.48517	9.95871			0.09	0.11
3.78189	7.49856			5.49857	44.6634			0.15	0.6
5.17874	9.53994			13.234	7.0524			0.26	0.07
7.07238	13.2157			22.2093	19.7834			0.31	0.15
7.75602	6.41982			1.97532	24.1896			0.03	0.38
4.3081	13.7814			1.8354	75.029			0.04	0.54
3.18077	4.07618			4.70815	11.6071			0.15	0.28
2.50945	6.0699			6.61779	3.30153			0.26	0.05
3.9023	9.1566			9.57886	26.9956			0.25	0.29
6.21468	4.59311			19.99	4.816			0.32	0.1
5.28746	11.9584			13.6484	27.0576			0.26	0.23
5.11774	6.56532			3.19924	25.0464			0.06	0.38
5.3076	10.1488			28.4551	41.3476			0.54	0.41
10.0014	13.3934			7.51047	32.3954			0.08	0.24
8.36388	5.17391			35.6613	5.25985			0.43	0.1
5.8865	17.8552			5.10836	28.4878			0.09	0.16
6.24726	9.35982			8.37456	11.0939			0.13	0.12
4.96387	2.36999			6.59183	3.29529			0.13	0.14
7.06374	3.52466			10.9207	7.09501			0.15	0.2
4.59797	9.93786			12.0704	15.7957			0.26	0.16
9.12096	5.4394			30.4906	7.87985			0.33	0.14
7.56252	4.77982			23.5471	4.05942			0.31	0.08
7.76052	6.46176			25.253	6.15144			0.33	0.1
5.40984	4.08904			22.2651	19.6988			0.41	0.48
3.28071	13.3563			8.7582	21.2906			0.27	0.16
11.4525	7.82502			18.1462	23.2058			0.16	0.3
4.86963	6.60288			7.25767	12.2437			0.15	0.19
12.7876	3.50162			45.9707	2.82412			0.36	0.08
5.66191	9.23196			4.12043	8.10598			0.07	0.09
3.64928	5.68085			4.05825	33.2258			0.11	0.58
14.5619	8.24406			107.476	22.8671			0.74	0.28
5.20403	12.3103			13.812	30.1056			0.27	0.24
5.74313	8.1135			4.70396	25.3398			0.08	0.31
7.55862	11.8102			26.4322	53.7763			0.35	0.46
5.10323	12.6188			19.6408	34.37			0.38	0.27
4.1258	5.79658			8.77507	14.1705			0.21	0.24
3.34012	7.29942			10.2281	9.53246			0.31	0.13
6.8835	11.8936			22.105	61.6069			0.32	0.52
6.12228	6.11292			5.50943	1.52994			0.09	0.03
4.32941	11.4567			14.5107	48.2534			0.34	0.42
7.9944	6.51756			42.3673	9.28318			0.53	0.14
9.34134	10.2658			11.9426	61.1164			0.13	0.6
4.58225	7.94826			6.35545	2.04647			0.14	0.03
4.93432	12.1639			2.97383	43.7863			0.06	0.36
5.78132	5.50025			6.93229	0.888854			0.12	0.02
11.7899	9.96798			51.7309	3.43151			0.44	0.03
7.1622	5.40588			12.3784	0.48594			0.17	0.01
9.08262	9.31236			34.9563	9.90591			0.38	0.11
6.45432	3.21337			1.43765	6.21243			0.02	0.19
2.96401	9.1542			5.39328	22.6633			0.18	0.25
4.70551	8.65848			8.74404	64.7649			0.19	0.75
3.81208	3.81665			16.3302	17.1885			0.43	0.45
5.1583	8.83824			6.29088	4.37854			0.12	0.05
6.67194	5.95321			24.2965	24.5584			0.36	0.41
10.9348	7.02438			9.84091	7.27876			0.09	0.1
9.13836	21.7528			18.1091	59.7433			0.2	0.27
7.48188	5.32636			15.2305	5.97265			0.2	0.11
8.35086	8.85438			38.553	14.0676			0.46	0.16
7.6167	11.7784			17.4576	12.0045			0.23	0.1
4.34272	13.1246			9.67058	37.9385			0.22	0.29
5.7784	7.1037			22.0283	6.83028			0.38	0.1
7.42296	4.81619			72.871	5.56449			0.98	0.12
9.42228	2.98214			24.2596	3.68123			0.26	0.12
6.80046	11.9304			19.1113	19.3003			0.28	0.16
6.43818	9.2637			5.11076	13.9978			0.08	0.15
6.83298	7.599			7.70324	9.02625			0.11	0.12
9.90366	7.41282			14.5048	10.1248			0.15	0.14
7.26906	4.44994			28.276	6.96183			0.39	0.16
8.5452	16.0281			9.78352	65.8097			0.11	0.41
7.491	10.2022			39.1277	12.7768			0.52	0.13
4.92334	13.4677			10.7534	29.5573			0.22	0.22
6.09726	8.79402			19.2398	39.2323			0.32	0.45
11.9666	14.5123			11.9326	10.4312			0.1	0.07
9.81426	9.5844			10.7718	2.12064			0.11	0.02
8.82474	6.44874			19.0088	10.8712			0.22	0.17
5.16559	7.5765			19.035	3.4994			0.37	0.05
6.4938	14.6907			1.85814	31.9244			0.03	0.22
10.1577	17.7509			37.2973	19.9959			0.37	0.11
10.3652	7.93206			52.0846	7.61345			0.5	0.1
3.57333	10.514			0.104764	37.3222			0	0.35
5.15012	18.6877			4.07761	18.716			0.08	0.1
5.43459	3.46096			14.691	5.11872			0.27	0.15
5.27455	13.6762			32.4689	35.6529			0.62	0.26
6.63234	9.08826			17.2211	5.62241			0.26	0.06
4.67628	19.3938			7.3756	69.1094			0.16	0.36
6.47166	8.31774			15.6442	3.79108			0.24	0.05
5.01272	8.8326			2.68924	6.03715			0.05	0.07
2.70666	7.33398			6.92605	12.0412			0.26	0.16
4.72229	13.6103			9.64584	7.08116			0.2	0.05
11.0358	12.3838			47.0246	40.6457			0.43	0.33
5.44726	6.38526			9.54946	36.2934			0.18	0.57
3.84695	9.49572			7.06607	14.0471			0.18	0.15
2.35729	4.83293			3.28013	12.9285			0.14	0.27
3.38864	8.67858			14.4242	15.3827			0.43	0.18
5.01655	8.56668			6.63917	8.73423			0.13	0.1
2.62402	16.8704			5.45594	44.4941			0.21	0.26
6.08838	5.01991			18.3251	31.3574			0.3	0.62
10.3685	8.44518			40.4572	11.9123			0.39	0.14
7.09164	16.8165			12.5922	97.2785			0.18	0.58
7.9086	7.88496			31.0402	8.68169			0.39	0.11
9.09414	5.6635			80.9034	3.54321			0.89	0.06
5.24288	7.56618			13.9084	18.3706			0.27	0.24
7.36632	5.88938			6.48619	28.4577			0.09	0.48
6.64812	7.46052			40.2129	2.4923			0.6	0.03
5.75532	9.4845			36.6041	5.00412			0.64	0.05
6.70098	20.223			18.09	31.2262			0.27	0.15
10.1345	9.47436			44.9294	35.7263			0.44	0.38
2.06097	5.47325			10.0041	2.2418			0.49	0.04
7.40802	5.31798			50.3143	8.78843			0.68	0.17
10.4837	4.26655			16.7361	5.38593			0.16	0.13
3.12935	5.63785			7.43499	1.15907			0.24	0.02
6.37326	11.054			13.4857	21.5268			0.21	0.19
4.13417	9.92958			13.9123	26.7394			0.34	0.27
4.41439	11.2517			7.71566	89.1526			0.17	0.79
3.72125	13.1251			10.377	30.147			0.28	0.23
3.02758	6.47856			25.557	9.59492			0.84	0.15
9.30624	7.47486			41.3846	8.64112			0.44	0.12
3.90704	6.25842			3.0901	7.24017			0.08	0.12
8.74188	4.89186			41.7686	10.5471			0.48	0.22
4.52318	6.54852			28.7005	6.85203			0.63	0.1
16.2531	16.1838			23.3972	24.4515			0.14	0.15
5.05786	3.14687			18.1288	12.9801			0.36	0.41
5.29776	4.02716			29.1374	18.4165			0.55	0.46
8.85438	11.837			27.2588	19.0494			0.31	0.16
4.28424	11.9947			16.4599	62.9541			0.38	0.52
1.21697	5.67098			8.12942	16.0257			0.67	0.28
1.85861	11.9918			5.68088	5.99947			0.31	0.05
4.17329	8.0577			19.9639	14.1642			0.48	0.18
6.30342	10.5168			4.34811	37.0076			0.07	0.35
5.9404	15.2933			35.3311	45.6957			0.59	0.3
	12.409				6.56822				0.05
	12.8416				37.7414				0.29
	20.5871				8.21717				0.04
	17.309				88.7611				0.51
	14.4573				41.9872				0.29
	6.73788				3.59632				0.05
	5.69329				26.32				0.46
	17.9152				36.5902				0.2
	12.3777				39.5654				0.32
	4.66138				15.0937				0.32
	6.97944				10.0942				0.14
	8.886				14.7074				0.17
	13.2191				56.4435				0.43
	6.8112				5.65933				0.08
	7.46982				17.1163				0.23
	8.84772				8.3421				0.09
	16.2563				117.444				0.72
	9.62178				19.8042				0.21
	4.19836				15.7604				0.38
	9.03816				18.4145				0.2
	8.64972				52.9953				0.61
	11.4683				32.502				0.28
	13.8859				57.8959				0.42
	8.80008				34.4723				0.39
	16.0107				80.5812				0.5
	6.41238				10.7571				0.17
	7.55382				5.09528				0.07
	11.6952				11.7295				0.1
	5.66558				36.5926				0.65
	10.0801				50.4334				0.5
	16.6313				28.0591				0.17
	11.2611				1.16233				0.01
	6.9426				1.70619				0.02
	6.33138				6.93564				0.11
	8.78286				29.0908				0.33
	16.8366				41.6202				0.25
	12.3887				36.7653				0.3
	17.2073				86.8209				0.5
	5.55761				15.7555				0.28
	6.68832				37.8053				0.57
	9.2175				48.7233				0.53
	9.41568				10.264				0.11
	5.59678				19.0396				0.34
	8.78892				3.8001				0.04
	12.9937				33.4447				0.26
	2.8448				7.81995				0.27
	5.30967				14.8387				0.28
	7.70376				13.6472				0.18
	9.27618				22.5758				0.24
	8.9787				11.8311				0.13
	6.9069				20.9111				0.3
	8.22012				9.6077				0.12
	5.03379				14.3971				0.29
	7.0281				13.4619				0.19
	2.4369				2.49549				0.1
	10.2325				17.5471				0.17
	2.91086				7.42101				0.25
	4.10009				6.33045				0.15
	17.5596				108.398				0.62
	10.4477				49.5425				0.47
	6.23094				22.6125				0.36
	7.05726				16.5187				0.23
	9.67266				79.0871				0.82
	11.4858				23.4812				0.2
	6.47202				15.3722				0.24
	9.32172				4.25868				0.05
	9.75018				15.7269				0.16
	8.0154				16.4385				0.21
	11.6822				7.73653				0.07
	6.28962				46.2411				0.74
	12.9725				16.6592				0.13
	5.47297				12.8115				0.23
	5.98974				5.98576				0.1
	16.1629				16.7346				0.1
	8.72484				13.2172				0.15
	11.245				21.485				0.19
	7.18944				11.4037				0.16
	3.27521				12.8285				0.39
	9.93864				34.4212				0.35
	7.58892				23.6807				0.31
	7.30914				7.959				0.11
	5.41787				9.08533				0.17
	11.0858				95.6594				0.86
	13.2303				57.2696				0.43
	21.0368				95.9228				0.46
	7.09212				11.5928				0.16
	5.3803				12.495				0.23
	15.553				71.7035				0.46
	7.81986				21.9557				0.28
	5.30444				40.3635				0.76
	15.3209				67.1797				0.44
	9.90552				7.59044				0.08
	17.0869				91.2305				0.53
	7.22646				25.3898				0.35
	11.2339				29.6377				0.26
	4.14215				16.4363				0.4
	8.18868				26.2237				0.32
	9.08688				14.7959				0.16
	11.3381				19.7634				0.17
	2.00926				6.90144				0.34
	10.097				23.6858				0.23
	12.5805				7.98398				0.06
	6.27258				27.0695				0.43
	4.14645				26.613				0.64
	8.70072				30.6141				0.35
	12.9408				67.2858				0.52
	7.06236				5.55867				0.08
	17.2554				38.9646				0.23
	5.45678				7.24257				0.13
	15.2137				36.4792				0.24
	8.58012				31.3811				0.37
	12.6651				11.0064				0.09
	5.80825				4.33002				0.07
	14.3899				22.4566				0.16
	9.7098				6.32408				0.07
	6.51102				21.2089				0.33
	5.62685				26.4933				0.47
	6.64272				6.41882				0.1
	9.51				34.1563				0.36
	15.9677				39.1743				0.25
	8.33214				6.25611				0.08
	5.6186				8.27608				0.15
	7.11186				11.0672				0.16
	14.3234				72.2147				0.5
	4.95136				27.1534				0.55
	11.7863				6.24449				0.05
	4.99391				8.16486				0.16
	22.7815				56.6656				0.25
	12.996				92.8259				0.71
	10.5913				14.7476				0.14
	4.60417				15.9434				0.35
	17.8816				18.9932				0.11
	20.721				42.7545				0.21
	13.2076				42.8745				0.32
	6.05364				10.5786				0.17
	11.5134				9.05514				0.08
	6.82248				14.2389				0.21
	7.01262				25.0866				0.36
	5.79793				15.108				0.26
	6.82026				15.2285				0.22
	4.79718				12.3446				0.26
	14.1789				44.6819				0.32
	14.7679				52.7835				0.36
	11.0078				54.0014				0.49
	6.12516				14.0754				0.23
	6.4725				14.3236				0.22
	6.16416				13.4404				0.22
	15.1684				23.6658				0.16
	9.1884				29.5165				0.32
	10.262				48.3983				0.47
	9.8487				6.83402				0.07
	9.53826				29.2902				0.31
	9.56346				10.0631				0.11
	6.89574				12.7736				0.19
	8.31954				20.5796				0.25
	9.0297				36.0989				0.4
	17.5681				65.1271				0.37
	3.24698				16.6374				0.51
	8.9298				18.4897				0.21
	7.40082				23.0546				0.31
	11.4812				20.2618				0.18
	10.0249				36.9078				0.37
	11.3821				14.9146				0.13
	7.6668				36.7511				0.48
	4.9493				14.5198				0.29
	6.43362				57.321				0.89
	10.3806				66.2461				0.64
	19.9128				84.8421				0.43
	14.7125				93.7782				0.64
	10.9384				32.7646				0.3
	5.37838				37.5814				0.7
	8.72286				44.2404				0.51
	17.6011				34.3813				0.2
	10.3577				49.7403				0.48
	6.82554				36.1913				0.53
	5.1275				16.8546				0.33
	3.40567				7.53308				0.22
	11.8146				33.2995				0.28
	10.3776				2.45463				0.02
	17.4651				30.4855				0.17
	16.2476				87.1478				0.54
	5.60371				34.0901				0.61
	5.16332				10.8388				0.21
	6.62412				55.7392				0.84
	3.45328				21.8914				0.63
	9.06672				24.5424				0.27
	6.98622				36.7963				0.53
	4.52702				17.0214				0.38

## Sheet: Figure 4D
Track Speed				Displacement				Track Straightness
1_WT	3_WT_MRS	5_WT_PSB		1_WT	3_WT_MRS	5_WT_PSB		1_WT	3_WT_MRS	5_WT_PSB
0	0	1.2		5.78269	11.7612	1.89804		0.14	0.65	0.19
0	0	1.8		1.73696	2.05649	2.19208		0.11	0.14	0.13
0	1.8	1.2		10.7747	3.53114	3.03391		0.37	0.12	0.25
4.104	1.428	1.2		1.76072	1.09811	0.875478		0.03	0.07	0.09
1.656	2.838	1.8		5.70113	3.74056	3.13469		0.37	0.18	0.15
2.934	1.68	0.6		3.47331	3.30655	0.249559		0.09	0.09	0.03
5.43	2.082	1.8		2.21531	0.5632	0.159205		0.13	0.01	0.01
1.542	3.768	0.6		0.395838	3.52252	0.366994		0.03	0.25	0.05
3.702	4.164	0.6		1.19532	4.51822	0.703594		0.05	0.25	0.1
1.644	1.38	1.8		5.81273	1.30337	0.925961		0.4	0.09	0.05
1.29	1.818	0.6		2.56684	1.38449	1.31048		0.13	0.09	0.16
2.562	1.476	1.2		5.0535	8.35316	0.196926		0.21	0.17	0.02
1.446	1.482	1.2		30.3546	3.48249	1.05953		0.97	0.16	0.11
1.974	5.01	0.6		6.69737	10.4941	0.465116		0.4	0.26	0.07
2.4	2.214	1.8		0.494907	1.3003	1.09087		0.02	0.06	0.07
3.132	4.104	1.8		0.77054	5.95348	9.71191		0.04	0.35	0.58
1.674	2.184	1.2		1.5124	2.76014	0.320582		0.14	0.18	0.04
2.064	1.698	1.2		9.86519	4.26197	1.48335		0.28	0.12	0.14
2.196	1.494	1.2		5.67572	9.09982	3.06534		0.3	0.32	0.3
1.062	3.606	1.8		2.43078	2.4296	1.89229		0.13	0.08	0.09
3.552	2.868	1.2		8.8847	7.29304	1.15205		0.24	0.14	0.1
1.92	3.192	1.8		13.1444	4.5891	1.07021		0.37	0.26	0.05
1.806	5.244	0.6		2.99374	8.46764	0.41711		0.14	0.32	0.05
3.684	1.782	1.2		15.2074	1.36172	0.855758		0.59	0.05	0.08
3.51	2.622	1.2		19.3072	8.09887	1.61034		0.33	0.47	0.16
2.088	2.484	0.6		7.33212	5.84865	0.384412		0.3	0.37	0.05
2.574	1.74	2.4		10.2247	6.15855	3.79946		0.18	0.27	0.16
5.82	1.572	1.2		12.3098	1.71858	2.84492		0.38	0.05	0.2
2.418	2.304	1.2		4.70373	1.38555	2.40488		0.15	0.08	0.19
5.598	3.138	1.8		16.5039	0.898089	0.374633		0.51	0.07	0.02
3.234	1.758	1.2		1.46387	0.632613	1.42178		0.03	0.05	0.15
3.06	1.26	0.6		7.86547	21.1331	2.52615		0.14	0.49	0.32
3.252	1.176	1.2		12.1587	5.13861	3.40731		0.66	0.3	0.26
4.524	4.32	0.6		45.7377	5.26384	0.181551		0.42	0.18	0.02
5.652	1.74	1.2		1.21708	8.32858	2.26812		0.08	0.44	0.18
1.842	2.88	1.2		6.31698	3.5421	6.32902		0.1	0.17	0.51
10.8	1.914	1.2		2.41251	2.20597	0.899349		0.15	0.2	0.09
1.596	2.082	1.2		31.0629	0.857363	0.710719		0.96	0.06	0.06
6.54	1.122	1.2		1.57517	4.28157	3.78902		0.12	0.11	0.33
1.62	1.524	0.6		16.3909	6.95508	0.747382		0.66	0.26	0.1
3.252	3.852	1.8		4.94699	2.76767	1.63836		0.19	0.1	0.1
1.266	2.706	1.8		17.3654	8.18981	0.706152		0.73	0.45	0.04
2.466	2.796	0.6		20.9565	1.34951	0.978436		0.52	0.12	0.12
2.568	1.812	1.2		9.59365	1.48076	2.02397		0.25	0.06	0.17
2.382	1.14	1.2		10.2974	5.78684	2.09749		0.15	0.22	0.22
4.044	2.382	1.2		18.2864	1.88828	1.82433		0.55	0.12	0.18
3.87	2.598	1.2		6.37057	7.16179	1.33869		0.29	0.41	0.11
6.84	1.614	0.6		0.912522	0.507941	2.61145		0.04	0.04	0.37
3.348	1.728	1.8		5.52015	6.28299	3.32289		0.28	0.28	0.21
2.232	1.14	0.6		35.9389	1.11274	0.740645		0.44	0.06	0.08
2.13	2.232	3		1.46867	1.91496	13.7094		0.06	0.11	0.5
1.98	2.016	1.2		15.8805	15.0699	3.78212		0.24	0.36	0.35
8.22	1.758	3		2.88574	4.92246	5.91769		0.16	0.16	0.21
2.508	4.146	1.2		4.99023	6.41796	4.94113		0.17	0.28	0.47
6.6	3.006	1.2		11.0976	2.54218	1.14712		0.13	0.15	0.12
1.854	2.322	0.6		21.6282	0.442631	0.583797		0.63	0.02	0.09
2.964	1.728	0.6		1.42164	2.51469	1.02702		0.07	0.16	0.14
8.82	2.088	0.6		4.50647	0.306996	1.65044		0.08	0.02	0.23
3.456	1.608	1.2		1.02208	0.775493	2.22628		0.05	0.05	0.24
2.118	1.5	1.2		19.9932	17.0706	2.39635		0.19	0.58	0.2
5.472	1.53	5.4		15.8912	1.80879	3.65421		0.65	0.12	0.07
1.908	2.952	1.2		1.64857	8.45111	1.59244		0.11	0.38	0.16
10.68	1.5	1.2		2.86783	1.81947	2.0191		0.13	0.16	0.16
2.46	2.25	1.2		10.6763	1.42476	0.335096		0.43	0.09	0.03
1.566	1.152	0.6		5.68562	0.18474	2.39542		0.11	0.03	0.39
2.25	1.656	3.6		1.38913	6.00684	0.571722		0.05	0.41	0.02
2.478	0.5472	1.8		24.6811	5.9523	2.62334		0.46	0.1	0.16
5.118	1.458	0.6		4.86492	8.93938	0.435098		0.04	0.39	0.07
2.538	5.79	1.2		10.8827	8.28397	1.14737		0.44	0.28	0.09
5.388	2.316	0.6		11.548	13.0352	1.30727		0.46	0.57	0.16
11.76	2.964	2.4		2.04446	6.66866	2.63031		0.11	0.19	0.12
2.454	2.292	1.2		10.8525	5.0564	1.53525		0.26	0.18	0.15
2.508	3.6	2.4		26.8813	2.59214	12.0828		0.35	0.21	0.5
1.932	2.772	0.6		6.4964	1.53721	1.19026		0.41	0.1	0.15
4.122	1.224	7.8		10.7355	5.39897	5.76042		0.13	0.18	0.07
7.74	1.482	0.6		2.93663	0.307339	0.858498		0.13	0.02	0.11
1.572	2.976	0.6		1.55909	3.6776	1.06926		0.04	0.25	0.15
8.04	1.518	1.2		2.76985	6.38862	5.44134		0.12	0.19	0.38
2.256	1.482	1.2		18.1812	2.21657	0.429633		0.15	0.15	0.04
4.026	3.372	1.8		4.78461	0.317132	0.656555		0.16	0.01	0.04
2.322	1.446	0.6		1.46616	2.39356	0.410439		0.05	0.2	0.05
11.88	2.874	0.6		10.2308	0.808978	1.80024		0.47	0.04	0.3
2.994	1.2	1.2		21.4521	20.3059	1.75208		0.63	0.32	0.14
2.856	2.028	0.6		6.37695	0.392687	0.6188		0.39	0.01	0.07
2.19	6.3	1.2		1.93483	2.46438	4.55334		0.1	0.12	0.33
3.414	2.652	1.2		4.14058	12.9719	0.747716		0.12	0.51	0.07
1.638	2.094	1.8		3.22696	0.873493	4.27042		0.17	0.04	0.26
1.848	2.556	1.2		9.99517	16.984	2.02067		0.53	0.47	0.19
3.372	2.238	1.2		9.57695	29.2247	2.57956		0.2	0.89	0.24
1.95	3.648	0.6		6.29866	3.68933	0.272893		0.2	0.15	0.04
1.878	3.294	1.2		5.61762	2.98136	3.84606		0.07	0.26	0.28
4.674	2.49	0.6		20.4971	5.43093	0.182659		0.44	0.3	0.03
3.21	1.146	1.8		1.90216	12.9225	1.81364		0.12	0.5	0.11
7.92	1.8	1.2		29.7399	2.20783	0.262223		0.53	0.15	0.02
4.65	2.58	0.6		35.3375	2.34257	2.64782		0.34	0.21	0.39
1.644	1.44	1.2		8.94815	2.64393	1.37956		0.32	0.11	0.12
5.574	1.134	0.6		1.66831	3.8461	1.38231		0.11	0.31	0.2
10.38	2.394	1.2		4.21869	2.4032	1.46521		0.2	0.06	0.12
2.76	1.224	1.2		0.658803	10.2852	2.3297		0.02	0.5	0.21
1.47	3.948	0.6		15.0417	0.412098	2.20456		0.42	0.03	0.32
2.112	2.064	0.6		2.39747	0.727013	0.899403		0.07	0.06	0.11
3.774	1.32	0.6		3.44892	0.591982	1.91468		0.16	0.05	0.25
3.582	1.236	1.2		8.44183	8.22823	2.53898		0.16	0.23	0.27
3.342	1.212	1.8		15.6144	2.82306	2.12865		0.29	0.22	0.13
2.202	3.576	2.4		6.93655	0.578056	7.42725		0.39	0.07	0.33
5.124	1.284	0.6		1.78817	4.55541	2.12126		0.1	0.19	0.27
5.364	0.834	0.6		1.42651	1.37147	2.25034		0.08	0.06	0.25
1.764	2.412	2.4		32.9446	3.76936	4.74875		0.43	0.37	0.19
1.758	2.184	0.6		20.6137	0.417265	0.863839		0.38	0.04	0.11
1.896	1.02	1.2		5.9763	1.52207	0.866403		0.1	0.11	0.06
7.62	1.164	2.4		20.5672	1.06718	5.35657		0.26	0.1	0.23
5.37	1.41	1.2		2.16563	1.77446	4.0386		0.08	0.06	0.39
6	1.11	1.2		7.90446	8.07549	6.20445		0.13	0.57	0.5
7.92	2.94	1.8		12.6853	2.18701	8.20066		0.15	0.15	0.44
2.742	1.41	1.2		3.3708	2.11403	2.64087		0.16	0.08	0.28
6.18	1.458	0.6		3.04725	0.783721	2.03668		0.07	0.02	0.33
8.7	2.628	0.6		5.1516	1.01691	2.20917		0.13	0.06	0.25
2.064	3.942	1.2		16.5181	0.304652	0.666839		0.48	0.02	0.06
4.302	1.746	0.6		0.977994	0.32877	1.50402		0.03	0.02	0.19
3.996	1.26	1.8		1.18444	3.74984	4.50869		0.09	0.28	0.28
3.474	2.166	1.8		6.25444	0.456086	2.53313		0.27	0.02	0.13
2.88	1.362	1.2		7.25661	45.4664	2.93659		0.22	0.89	0.24
1.374	2.124	1.2		5.01136	0.762439	1.80632		0.09	0.03	0.2
2.346	5.094	1.8		13.5628	2.72463	0.791985		0.22	0.15	0.05
3.258	2.598	1.8		3.76085	9.68933	2.19832		0.14	0.16	0.13
5.592	1.758	0.6		59.857	7.4011	0.881767		0.86	0.28	0.17
6.12	6.18	1.2		23.8491	7.56886	1.90843		0.68	0.29	0.13
2.694	2.616	1.2		3.67838	2.26446	2.67451		0.17	0.14	0.21
6.96	2.652	0.6		3.79023	0.692154	0.613331		0.24	0.05	0.08
3.51	1.614	1.2		5.45536	7.15381	3.60245		0.12	0.27	0.31
2.172	1.296	0.6		6.10272	11.4866	0.197217		0.43	0.65	0.02
1.554	2.676	0.6		5.94339	12.614	0.340988		0.22	0.17	0.06
4.716	1.752	0.6		3.04858	3.1177	1.51932		0.12	0.15	0.23
1.416	7.32	0.6		6.0592	4.21781	0.742696		0.13	0.16	0.09
2.718	2.112	0.6		2.01659	11.213	0.629815		0.14	0.5	0.12
2.562	2.64	0.6		41.0507	2.47749	0.868352		0.39	0.12	0.15
4.722	2.25	0.6		9.50412	32.7164	2.59323		0.39	0.71	0.29
1.41	2.118	1.2		4.06699	6.80117	1.72184		0.14	0.28	0.17
10.44	4.626	1.8		14.264	7.45996	16.841		0.54	0.24	0.94
2.454	2.4	0.6		4.88622	1.63406	0.439779		0.22	0.08	0.08
2.97	3.06	1.2		25.5931	6.83932	2.84981		0.78	0.21	0.22
2.622	1.974	1.2		23.0876	5.11679	2.53348		0.3	0.22	0.2
2.19	3.264	2.4		5.84553	15.4523	7.6032		0.19	0.24	0.3
3.3	2.292	1.2		4.96682	4.00132	1.42916		0.27	0.08	0.15
7.8	6.54	1.2		3.20086	15.1795	1.33184		0.12	0.53	0.11
3.084	4.782	1.2		74.1051	3.36296	4.5603		0.61	0.11	0.39
1.872	2.874	1.2		24.0755	2.48995	2.47698		0.52	0.1	0.23
2.706	3.126	1.8		4.18987	19.768	3.67281		0.15	0.54	0.2
12.12	2.508	1.2		5.06298	11.4973	6.14859		0.16	0.18	0.57
4.602	3.63	1.2		7.60332	2.18491	0.746513		0.19	0.06	0.07
2.808	6.42	0.6		19.9254	3.45888	0.740931		0.58	0.08	0.14
3.138	3.576	0.6		7.2234	56.266	0.683093		0.31	0.8	0.08
3.966	4.506	0.6		3.80024	10.2258	0.508836		0.17	0.52	0.08
3.45	7.08	2.4		22.8598	6.71842	1.00998		0.39	0.23	0.05
2.364	1.98	1.8		5.862	9.02765	6.01997		0.31	0.37	0.33
2.244	2.946	2.4		40.0495	9.30775	0.536045		0.28	0.31	0.02
5.802	2.46	1.8		33.9028	27.0497	0.293852		0.25	0.73	0.01
1.914	3.024	4.2		4.85527	5.7479	8.77524		0.12	0.12	0.21
14.04	3.696	1.2		16.4836	12.8473	1.31891		0.4	0.18	0.14
13.56	4.764	5.4		4.04	14.9709	2.76667		0.12	0.48	0.05
4.14	7.14	2.4		16.0333	9.31236	2.52408		0.18	0.39	0.11
4.092	3.138	1.2		3.38961	78.8206	2.01461		0.17	0.85	0.21
3.258	2.388	0.6		1.83672	11.315	0.841772		0.06	0.32	0.1
9.06	9.3	1.2		11.4572	13.4667	2.77196		0.35	0.41	0.21
1.956	3.558	2.4		0.466004	10.3285	4.15767		0.01	0.19	0.16
2.928	3.276	6		9.99535	0.449625	1.64869		0.36	0.02	0.03
3.318	5.316	1.2		5.78308	5.37846	3.44451		0.13	0.16	0.34
6.54	2.778	1.8		3.43157	4.43479	16.2011		0.1	0.13	0.85
2.814	3.444	1.2		6.97766	2.66007	0.729946		0.2	0.2	0.08
4.326	3.342	3		26.0629	3.30868	8.5552		0.84	0.12	0.29
3.528	1.314	1.2		5.25824	90.455	0.651049		0.06	0.94	0.06
3.48	2.682	1.8		36.9439	18.8307	2.83069		0.37	0.59	0.15
3.102	9.6	1.2		11.3779	16.8226	1.59725		0.28	0.66	0.11
9.42	3.204	3		11.4682	8.71492	1.80378		0.42	0.33	0.06
9.9	2.538	0.6		46.6886	14.1502	0.141874		0.45	0.62	0.03
4.092	2.616	2.4		13.7942	7.90793	1.66609		0.25	0.36	0.07
2.754	2.28	3.6		8.36376	13.8888	3.7488		0.25	0.79	0.1
10.38	2.196	1.2		19.7477	3.0024	3.06767		0.26	0.09	0.23
5.49	1.764	1.2		19.8561	75.6329	0.492147		0.2	0.93	0.05
3.366	3.186	1.2		42.7293	40.5278	3.22885		0.43	0.93	0.27
7.5	8.16	3		23.4074		16.1718		0.72		0.6
9.78	4.344			25.5832				0.25
10.02				65.035				0.47
3.228				10.7697				0.13
10.14				27.6905				0.59
13.98				82.1406				0.81
8.28				36.0677				0.61
4.686
10.14
5.88

## Sheet: Figure 4E
Track Speed				Displacement				Track Straightness
4_WT_1Ca 2p5uM ADP_15s 180fr	6_WT_0Ca 2p5uM ADP_15s 180fr			4_WT_1Ca 2p5uM ADP_15s 180fr	6_WT_0Ca 2p5uM ADP_15s 180fr			4_WT_1Ca 2p5uM ADP_15s 180fr	6_WT_0Ca 2p5uM ADP_15s 180fr
4.93791	4.52593			4.04024	1.9851			0.08	0.04
5.13087	5.43271			31.3037	5.13978			0.61	0.09
6.5388	4.04418			12.9807	1.3521			0.2	0.03
4.90245	5.17675			16.0071	27.1401			0.33	0.52
5.04547	6.52764			3.18528	14.6447			0.06	0.22
2.95649	2.40729			0.766811	2.85618			0.03	0.12
6.1791	4.07619			9.11853	2.11258			0.15	0.05
6.91872	6.87552			1.75151	1.55011			0.03	0.02
2.77609	4.08943			0.997562	2.38705			0.04	0.06
8.46654	9.927			4.0083	12.3735			0.05	0.12
5.26113	4.93363			14.1294	4.23895			0.27	0.09
7.00266	2.21078			18.8746	0.778675			0.27	0.04
6.10296	5.47726			17.4498	14.7604			0.29	0.27
4.16373	5.45328			5.39261	0.679757			0.13	0.01
5.29639	3.86626			1.54038	3.79594			0.03	0.1
13.1688	4.79557			3.64654	7.53678			0.03	0.16
9.11706	5.94074			12.322	3.51204			0.14	0.06
6.03744	5.24665			22.5923	1.07638			0.37	0.02
3.75762	2.26404			1.73059	2.56099			0.05	0.11
5.23972	5.3195			1.51682	12.9027			0.03	0.24
4.58837	4.64731			8.93808	2.23964			0.19	0.05
10.259	2.79946			40.4108	2.38229			0.39	0.09
5.7523	4.00537			2.05172	8.01335			0.04	0.2
6.4059	6.32196			5.53319	13.1016			0.09	0.21
4.78075	3.50456			6.73604	1.21585			0.14	0.03
8.01066	3.23686			6.64564	3.49455			0.08	0.11
8.1258	3.77396			3.99302	4.28189			0.05	0.11
4.04858	5.43653			3.82211	8.88275			0.09	0.16
3.58305	3.44356			2.13092	1.216			0.06	0.04
6.33774	4.37575			7.20227	2.68036			0.11	0.06
7.93416	5.17808			9.72834	2.86395			0.12	0.06
6.57408	2.94666			0.737539	3.74245			0.01	0.13
6.02178	4.35141			31.6298	8.94904			0.53	0.21
3.34295	4.95218			6.46514	3.45111			0.19	0.07
6.8313	6.16878			6.30965	1.29201			0.09	0.02
5.96264	2.57117			0.573544	4.85779			0.01	0.19
5.99077	3.05228			2.51656	2.66794			0.04	0.09
4.02919	3.60152			1.53074	0.694639			0.04	0.02
7.68342	3.80898			0.422829	4.90159			0.01	0.13
6.51072	3.6475			6.65228	7.66163			0.1	0.21
3.07555	4.15552			1.17532	6.48374			0.04	0.16
8.15034	3.16594			1.21449	4.62369			0.01	0.15
4.69989	5.7824			1.86168	5.38754			0.04	0.09
6.62292	2.88311			0.85522	2.32434			0.01	0.08
3.60796	5.32606			4.52508	3.41586			0.13	0.06
8.14314	3.44515			14.8619	4.25556			0.18	0.12
11.1396	2.2777			14.2416	1.44852			0.13	0.06
4.51657	4.7874			1.90722	1.19001			0.04	0.02
4.19198	3.76576			2.22236	0.301224			0.05	0.01
9.42354	5.02637			0.873726	3.54995			0.01	0.07
10.4094	5.79585			3.19023	3.55427			0.03	0.06
8.81706	2.66474			14.4582	1.28437			0.16	0.05
5.38792	5.03024			4.4555	5.45479			0.08	0.11
5.66584	4.9086			3.2156	3.26135			0.06	0.07
6.4896	2.33742			8.23647	0.034624			0.13	0
5.42548	6.14796			9.83786	1.3355			0.18	0.02
7.08444	6.9141			0.900274	5.7051			0.01	0.08
4.71892	4.93122			2.3385	0.381964			0.05	0.01
6.74694	3.70708			3.8666	3.55526			0.06	0.1
6.66864	4.16501			12.1683	8.47219			0.18	0.2
6.66492	4.65167			18.5067	4.81154			0.28	0.1
5.46331	3.23914			6.20664	1.4656			0.11	0.05
12.9025	3.62391			18.1342	2.10345			0.14	0.06
9.77226	4.61545			4.7356	1.04023			0.05	0.02
10.2628	5.67086			1.10213	8.94864			0.01	0.16
2.14415	4.09779			1.30392	2.71763			0.06	0.07
12.4419	3.34982			26.8287	1.65948			0.22	0.05
4.30319	4.07863			3.38386	6.2036			0.08	0.15
7.2228	3.53912			9.83254	4.33424			0.14	0.12
4.72752	3.49494			0.858787	2.1671			0.02	0.06
6.05736	5.00065			5.55752	3.47801			0.09	0.07
5.86675	2.03103			2.47597	0.483246			0.04	0.02
7.86648	5.56618			16.4439	6.17655			0.21	0.11
5.5959	5.72049			7.31269	5.60631			0.13	0.1
6.26202	4.97301			3.92346	5.69974			0.06	0.11
7.9278	3.28553			31.5948	3.46171			0.4	0.11
9.22332	2.66432			7.43166	8.70894			0.08	0.33
9.3501	3.71206			5.43012	7.06184			0.06	0.19
11.4143	3.66023			30.1998	2.88225			0.26	0.08
1.9962	1.68122			1.29887	0.349893			0.07	0.02
6.87924	3.10087			0.643666	2.20279			0.01	0.07
4.17336	4.31528			4.10918	3.03389			0.1	0.07
5.78498	2.90574			9.05622	2.18525			0.16	0.08
5.90164	2.28142			29.5217	4.71836			0.5	0.21
5.76902	5.24039			1.73331	15.5011			0.03	0.3
3.20025	4.50934			1.2237	0.774038			0.04	0.02
4.34137	2.83574			3.2697	2.55664			0.08	0.09
5.48869	4.1023			3.92036	0.249168			0.07	0.01
5.47886	4.92704			5.35226	1.66381			0.1	0.03
8.23818	4.26313			13.1986	2.71688			0.16	0.06
9.68658	6.07878			7.94174	13.008			0.08	0.21
6.93366	4.56873			1.55068	1.24538			0.02	0.03
8.66676	3.17974			12.6543	2.48639			0.15	0.08
8.46048	2.22514			68.1712	3.03849			0.81	0.14
5.02606	7.09506			3.94761	4.4431			0.08	0.06
13.9679	4.0957			11.1247	2.13803			0.08	0.05
4.84515	2.86914			7.57075	2.92115			0.16	0.1
8.48256	2.46677			25.5263	2.25821			0.3	0.09
6.16452	4.30177			25.1664	5.22579			0.41	0.12
3.7886	2.95384			5.03056	2.23514			0.13	0.08
8.08188	4.03976			6.09038	4.31879			0.08	0.11
7.45014	3.95231			4.53037	4.76034			0.06	0.12
3.6308	5.1073			4.58872	10.8016			0.13	0.21
3.89701	4.67169			6.60864	5.49061			0.17	0.12
4.38498	2.6735			6.5234	3.0963			0.15	0.12
3.12173	3.27875			8.21592	2.21457			0.26	0.07
4.89694	2.16791			0.62752	1.29529			0.01	0.06
5.52724	3.39345			1.57157	2.01769			0.03	0.06
9.96156	7.38318			9.45052	3.0707			0.09	0.04
8.70828	5.01821			46.271	1.723			0.53	0.03
8.93814	3.92326			1.98023	1.54198			0.02	0.04
3.71803	4.06081			2.34996	5.83509			0.06	0.14
4.10299	5.36951			3.25878	2.72591			0.08	0.05
2.85413	4.0318			1.40878	6.08688			0.05	0.15
8.41914	4.06314			4.97005	2.95684			0.06	0.07
5.9316	5.82422			4.46345	3.79493			0.08	0.07
4.75449	3.98209			7.45074	4.20255			0.16	0.11
6.70776	4.13891			7.38326	4.01958			0.11	0.1
11.3008	4.55449			5.24424	3.60075			0.05	0.08
8.93442	5.83028			4.2381	2.9722			0.05	0.05
4.87235	4.1714			0.534092	2.56251			0.01	0.06
3.83774	2.96068			7.6545	1.53479			0.2	0.05
3.81491	4.83662			1.86836	9.40143			0.05	0.19
6.22044	4.14284			18.8621	5.98842			0.3	0.14
7.06158	3.16519			0.011759	0.790852			0	0.02
5.00381	5.07219			3.70648	7.96983			0.07	0.16
3.11573	6.6015			1.80023	2.46776			0.06	0.04
13.5098	3.51434			14.8741	1.31344			0.11	0.04
6.1359	7.03362			5.121	6.68585			0.08	0.1
5.19058	4.38422			6.34489	8.63616			0.12	0.2
6.04146	3.69098			4.46161	6.55719			0.07	0.18
7.1355	6.22452			17.1657	5.5518			0.24	0.09
3.32609	5.1918			3.0514	2.69341			0.09	0.05
4.22026	3.62294			4.29105	9.99003			0.1	0.28
6.28074	3.34639			2.7767	1.59318			0.04	0.05
3.09691	3.81926			1.41204	2.73642			0.05	0.07
4.46213	4.17395			5.7727	0.686344			0.13	0.02
4.34587	5.08012			8.36408	1.37571			0.19	0.03
3.78377	4.20046			4.77688	1.5114			0.13	0.04
11.888	2.92817			8.22598	2.47777			0.07	0.08
9.18438	4.64605			3.2916	1.07931			0.04	0.02
5.10408	2.82817			3.69852	1.35621			0.07	0.05
3.73058	6.32844			9.33636	8.57409			0.25	0.14
18.9276	5.31472			114.387	1.34841			0.6	0.03
5.90675	3.17636			1.22812	5.48953			0.02	0.17
4.61863	3.60411			11.295	1.01787			0.24	0.03
7.82388	2.24701			10.4296	1.57016			0.13	0.07
2.7054	4.6493			0.601574	1.90722			0.02	0.04
6.53088	4.85392			7.20062	9.31434			0.11	0.19
5.8972	3.45569			4.11922	1.44998			0.07	0.04
9.13374	4.16717			12.5891	1.87102			0.14	0.04
3.78746	4.19966			2.98582	8.47813			0.08	0.2
4.44686	5.31266			4.89038	7.31274			0.11	0.14
8.72742	4.52787			1.87746	1.72257			0.02	0.04
8.78466	5.55843			6.50544	1.67352			0.07	0.03
9.17652	2.81664			12.2297	4.86788			0.13	0.17
4.49075	3.36744			5.62564	0.83995			0.13	0.02
5.84944	4.4465			10.5102	9.57099			0.18	0.22
3.62105	2.89021			1.07965	4.66641			0.03	0.16
6.27966	5.03126			13.1237	7.62056			0.21	0.15
6.95898	3.26075			23.9874	7.49407			0.34	0.23
2.52418	4.97103			0.888622	8.18257			0.04	0.16
5.86382	4.99382			1.73714	1.24773			0.03	0.02
14.3424	3.98292			34.3756	11.3395			0.24	0.28
4.98686	4.32242			1.48112	3.057			0.03	0.07
11.5187	5.58298			11.2792	5.10151			0.1	0.09
12.6908	2.34928			17.3711	0.358774			0.14	0.02
4.5418	5.97858			4.7115	15.2541			0.1	0.26
5.79551	5.76161			0.417126	2.6314			0.01	0.05
7.41156	2.80214			8.63478	2.09944			0.12	0.07
6.52908	3.38564			12.0286	2.23964			0.18	0.07
5.54046	3.72344			2.0318	1.58498			0.04	0.04
4.3864	4.48871			9.242	1.26179			0.21	0.03
4.2518	5.19858			2.8881	1.53816			0.07	0.03
7.15224	3.13084			4.69634	1.94461			0.07	0.06
9.36144	4.65683			12.8682	4.8401			0.14	0.1
3.88291	5.92939			10.8429	15.2309			0.28	0.26
8.00622	5.75414			1.90889	14.3037			0.02	0.25
7.3578	3.85885			33.0679	2.57512			0.45	0.07
4.70537	4.80062			1.14914	3.8201			0.02	0.08
5.32877	4.15856			3.2257	3.42155			0.06	0.08
16.508	5.3025			6.49366	1.29381			0.04	0.02
5.09545	4.21781			6.50936	2.5129			0.13	0.06
4.33736	6.0288			1.11246	4.02187			0.03	0.07
4.5397	4.6981			3.73746	2.82563			0.08	0.06
5.64942	3.5374			46.2197	8.50597			0.82	0.24
4.3589	5.55548			4.0116	4.21266			0.09	0.08
8.0022	3.88885			7.96153	2.08854			0.1	0.05
5.72545	7.67016			20.0909	0.439313			0.35	0.01
8.08902	5.06976			28.5038	5.74948			0.35	0.11
4.85527	5.19056			0.696169	3.7655			0.01	0.07
6.19566	4.39253			14.48	2.11327			0.23	0.05
4.21573	6.09126			10.4234	10.0099			0.25	0.16
3.00803	5.48535			2.58914	0.694732			0.09	0.01
4.12295	5.85579			5.36326	2.26832			0.13	0.04
6.40458	3.25905			3.21483	2.40026			0.05	0.07
13.0012	3.96597			63.4914	1.26814			0.49	0.03
4.41343	4.78176			5.70818	1.39767			0.13	0.03
5.83408	2.71819			4.62684	2.31502			0.08	0.09
6.67092	2.95414			2.07608	1.53289			0.03	0.05
5.43341	2.73802			2.6842	2.17152			0.05	0.08
5.41922	3.00649			6.18187	3.66203			0.11	0.12
4.88479	6.87954			11.3821	8.27745			0.23	0.12
8.09784	3.06778			0.412288	6.12082			0.01	0.2
3.96045	4.63139			5.21984	1.67008			0.13	0.04
3.60834	2.57662			2.53406	7.90166			0.07	0.31
11.9574	3.34223			58.28	1.68142			0.49	0.05
6.24546	5.24246			1.32499	3.7033			0.02	0.07
5.12789	4.48844			11.2236	1.36217			0.22	0.03
6.08652	6.08526			2.82364	2.57469			0.05	0.04
1.81609	5.1038			0.222074	1.10261			0.01	0.02
7.48386	3.84717			11.391	1.43911			0.15	0.04
4.89904	2.87262			5.68572	0.237877			0.12	0.01
5.07129	5.39342			1.22977	0.794923			0.02	0.01
10.745	2.50114			11.3287	2.30098			0.11	0.09
7.14732	3.51301			4.87958	5.46382			0.07	0.16
7.05246	2.28608			5.76772	2.87982			0.08	0.13
6.20406	5.66188			6.65571	2.56303			0.11	0.05
8.47614	4.18227			28.1301	12.0611			0.33	0.29
1.62884	3.93257			0.234582	5.45839			0.01	0.14
8.28006	2.87876			17.4483	2.47518			0.21	0.09
5.61498	3.31037			5.40641	2.75514			0.1	0.08
14.2526	3.22285			13.862	0.40191			0.1	0.01
12.3086	2.65441			15.4929	2.10046			0.13	0.08
9.99312	3.66919			0.875456	4.27177			0.01	0.12
4.5217	4.33915			1.90118	6.4274			0.04	0.15
5.19627	1.40089			6.0788	4.96309			0.12	0.35
5.95252	8.19996			10.6034	3.56376			0.18	0.04
9.14634	4.34314			13.9346	4.11204			0.15	0.09
7.2393	8.01288			6.0172	5.71992			0.08	0.07
11.1916	2.94091			57.6918	2.63781			0.52	0.09
7.91676	6.27522			7.02619	5.56804			0.09	0.09
4.06535	4.5527			4.02696	4.69602			0.1	0.1
6.32904	2.71797			25.7558	3.7216			0.41	0.14
5.09033	4.99903			2.62541	2.34249			0.05	0.05
10.1541	3.92806			13.8592	2.07799			0.14	0.05
9.75576	5.23467			3.15055	3.7393			0.03	0.07
10.6864	5.34586			10.7929	2.18022			0.1	0.04
7.18644	4.45656			27.4559	2.42517			0.38	0.05
12.0556	4.91058			5.9462	10.0599			0.05	0.2
3.79508	6.15132			5.92263	2.26688			0.16	0.04
6.69858	4.69571			12.9064	6.80008			0.19	0.14
10.789	5.80396			5.46603	4.163			0.05	0.07
5.49661	3.95954			13.1355	3.39143			0.24	0.09
3.53485	4.38698			19.7312	8.80242			0.56	0.2
15.6377	3.27913			32.9171	2.75474			0.21	0.08
9.57294	3.03545			3.65206	2.46625			0.04	0.08
6.95508	3.04018			22.7481	1.68864			0.33	0.06
6.3576	4.04365			3.90168	2.34634			0.06	0.06
6.13578	4.38701			4.55173	7.99042			0.07	0.18
4.91509	3.97677			33.3223	3.35361			0.68	0.08
8.57718	5.73478			28.0005	9.82432			0.33	0.17
7.71942	3.1464			18.2954	2.6591			0.24	0.08
13.1195	3.66689			10.3819	4.33352			0.08	0.12
9.34056	5.9645			39.6109	1.06903			0.42	0.02
12.883	5.35936			37.245	27.2808			0.29	0.51
9.60744	3.30638			9.24966	0.799074			0.1	0.02
10.3529	6.02442			31.8709	5.7904			0.31	0.1
7.3089	3.67912			29.2294	4.68777			0.4	0.13
13.2913	3.29989			22.5018	3.18154			0.17	0.1
10.6385	5.64412			53.5217	8.19512			0.5	0.15
8.1804	4.35982			1.3431	7.89648			0.02	0.18
7.58946	4.73336			40.9288	4.55089			0.54	0.1
6.7839	2.64452			4.28177	4.69346			0.06	0.18
4.77674	2.41381			2.13838	6.64733			0.04	0.28
11.1529	5.32567			7.70289	10.8675			0.07	0.2
4.86801	3.86099			10.8067	4.88407			0.22	0.13
8.32974	2.92041			47.1381	4.38603			0.57	0.15
4.28603	2.57719			8.46453	6.37866			0.2	0.25
4.71494	4.92565			0.284519	6.6236			0.01	0.13
10.9243	5.17304			1.2698	7.22612			0.01	0.14
9.57444	3.76741			1.21593	4.72454			0.01	0.13
10.3142	4.06698			31.4203	3.02584			0.3	0.07
13.0709	3.87124			27.8554	2.67671			0.21	0.07
6.24588	5.39002			4.31815	3.28279			0.07	0.06
7.1754	1.98686			16.6137	4.59878			0.23	0.23
10.1102	3.96187			9.30786	6.51424			0.09	0.16
9.2418	7.8645			20.6225	11.2288			0.22	0.14
5.631	4.83692			16.1173	3.52173			0.29	0.07
7.69314	5.06767			8.84591	6.075			0.11	0.12
5.92627	3.92402			5.73378	2.86792			0.1	0.07
8.12094	4.42282			23.6925	2.01608			0.29	0.05
5.99652	4.27635			16.0854	2.5423			0.27	0.06
13.5239	6.21624			51.2654	1.22228			0.38	0.02
9.00546	3.07311			9.95871	6.48945			0.11	0.21
7.49856	6.05736			44.6634	9.7654			0.6	0.16
9.53994	4.22117			7.0524	6.56413			0.07	0.16
13.2157	7.48884			19.7834	5.31545			0.15	0.07
6.41982	6.18918			24.1896	17.2662			0.38	0.28
13.7814	1.85991			75.029	3.4905			0.54	0.19
4.07618	3.18304			11.6071	8.29747			0.28	0.26
6.0699	4.60848			3.30153	10.0381			0.05	0.22
9.1566	3.82283			26.9956	4.64984			0.29	0.12
4.59311	5.17998			4.816	2.7144			0.1	0.05
11.9584	7.39542			27.0576	15.66			0.23	0.21
6.56532	5.6741			25.0464	6.88295			0.38	0.12
10.1488	5.87416			41.3476	5.11713			0.41	0.09
13.3934	6.66336			32.3954	3.18438			0.24	0.05
5.17391	6.22872			5.25985	11.4089			0.1	0.18
17.8552	3.16957			28.4878	2.83099			0.16	0.09
9.35982	8.02746			11.0939	7.20921			0.12	0.09
2.36999	5.17382			3.29529	5.8985			0.14	0.11
3.52466	5.30295			7.09501	4.54879			0.2	0.09
9.93786	5.91656			15.7957	11.8612			0.16	0.2
5.4394	4.66051			7.87985	3.01257			0.14	0.06
4.77982	3.64405			4.05942	5.25209			0.08	0.14
6.46176	3.32455			6.15144	6.61841			0.1	0.2
4.08904	4.00853			19.6988	3.64809			0.48	0.09
13.3563	6.636			21.2906	12.9277			0.16	0.19
7.82502	2.30254			23.2058	5.40189			0.3	0.23
6.60288	4.04319			12.2437	19.4507			0.19	0.48
3.50162	0.947502			2.82412	0.209107			0.08	0.02
9.23196	6.92358			8.10598	1.72095			0.09	0.02
5.68085	7.58454			33.2258	3.31406			0.58	0.04
8.24406	5.31043			22.8671	11.6192			0.28	0.22
12.3103	3.90328			30.1056	13.1327			0.24	0.34
8.1135	5.24185			25.3398	4.07091			0.31	0.08
11.8102	4.67699			53.7763	8.28654			0.46	0.18
12.6188	2.1851			34.37	2.81311			0.27	0.13
5.79658	9.04254			14.1705	2.88974			0.24	0.03
7.29942	3.27833			9.53246	0.38748			0.13	0.01
11.8936	2.05763			61.6069	15.0851			0.52	0.73
6.11292	7.99158			1.52994	7.55437			0.03	0.09
11.4567	5.48497			48.2534	7.90858			0.42	0.14
6.51756	5.15483			9.28318	8.68631			0.14	0.17
10.2658	6.06174			61.1164	2.71646			0.6	0.04
7.94826	4.7638			2.04647	5.52054			0.03	0.12
12.1639	8.20806			43.7863	7.13713			0.36	0.09
5.50025	4.05643			0.888854	6.17683			0.02	0.15
9.96798	3.2577			3.43151	20.6061			0.03	0.63
5.40588	6.71088			0.48594	7.32907			0.01	0.11
9.31236	3.16958			9.90591	0.499471			0.11	0.02
3.21337	3.65072			6.21243	7.12543			0.19	0.2
9.1542	9.4308			22.6633	4.18535			0.25	0.04
8.65848	5.28608			64.7649	20.5667			0.75	0.39
3.81665	1.48336			17.1885	13.8713			0.45	0.94
8.83824	4.04948			4.37854	6.00534			0.05	0.15
5.95321	8.51964			24.5584	51.5532			0.41	0.61
7.02438	8.0382			7.27876	10.4134			0.1	0.13
21.7528	5.06618			59.7433	19.7056			0.27	0.39
5.32636	7.95798			5.97265	6.57002			0.11	0.08
8.85438	3.88894			14.0676	5.59014			0.16	0.14
11.7784	5.26861			12.0045	9.88988			0.1	0.19
13.1246	4.25293			37.9385	14.2546			0.29	0.34
7.1037	4.04179			6.83028	8.06198			0.1	0.2
4.81619	3.70528			5.56449	29.8244			0.12	0.8
2.98214	7.1568			3.68123	10.0315			0.12	0.14
11.9304	7.92606			19.3003	8.81363			0.16	0.11
9.2637	10.3713			13.9978	74.8087			0.15	0.72
7.599	3.01054			9.02625	3.0412			0.12	0.1
7.41282	4.62904			10.1248	11.1663			0.14	0.24
4.44994	6.42684			6.96183	7.67236			0.16	0.12
16.0281	4.54489			65.8097	5.373			0.41	0.12
10.2022	4.80211			12.7768	1.45055			0.13	0.03
13.4677	4.45328			29.5573	4.07157			0.22	0.09
8.79402	3.97784			39.2323	1.34402			0.45	0.03
14.5123	6.47004			10.4312	29.3908			0.07	0.45
9.5844	3.8131			2.12064	3.44693			0.02	0.09
6.44874	2.49563			10.8712	24.0139			0.17	0.96
7.5765	5.44615			3.4994	15.5668			0.05	0.29
14.6907	3.05864			31.9244	6.92149			0.22	0.23
17.7509	6.43992			19.9959	9.75494			0.11	0.15
7.93206	5.12429			7.61345	8.31108			0.1	0.16
10.514	3.24167			37.3222	12.4763			0.35	0.38
18.6877	6.9963			18.716	8.93396			0.1	0.13
3.46096	3.26843			5.11872	1.52121			0.15	0.05
13.6762	4.94492			35.6529	8.71436			0.26	0.18
9.08826	5.81461			5.62241	3.05796			0.06	0.05
19.3938	5.21446			69.1094	3.96303			0.36	0.08
8.31774	6.06186			3.79108	17.8937			0.05	0.3
8.8326	4.19604			6.03715	6.1881			0.07	0.15
7.33398	1.88891			12.0412	4.74872			0.16	0.25
13.6103	4.3034			7.08116	5.34499			0.05	0.12
12.3838	4.56747			40.6457	28.2105			0.33	0.62
6.38526	7.05498			36.2934	3.2743			0.57	0.05
9.49572	11.5563			14.0471	6.73997			0.15	0.06
4.83293	4.96769			12.9285	5.24671			0.27	0.11
8.67858	2.36402			15.3827	2.81277			0.18	0.12
8.56668	6.73464			8.73423	14.3834			0.1	0.21
16.8704	7.41858			44.4941	24.7472			0.26	0.33
5.01991	7.95708			31.3574	5.39137			0.62	0.07
8.44518	3.70876			11.9123	12.6918			0.14	0.34
16.8165	3.826			97.2785	20.4158			0.58	0.53
7.88496	2.65195			8.68169	5.63913			0.11	0.21
5.6635	4.12553			3.54321	2.57539			0.06	0.06
7.56618	1.94359			18.3706	5.26556			0.24	0.27
5.88938	5.04325			28.4577	12.8797			0.48	0.26
7.46052	5.20641			2.4923	2.58211			0.03	0.05
9.4845	4.45078			5.00412	19.057			0.05	0.43
20.223	7.01844			31.2262	11.331			0.15	0.16
9.47436	2.67997			35.7263	11.1821			0.38	0.42
5.47325	20.603			2.2418	4.41627			0.04	0.02
5.31798	5.58152			8.78843	24.436			0.17	0.44
4.26655	5.56126			5.38593	21.0567			0.13	0.38
5.63785	3.74101			1.15907	8.55204			0.02	0.23
11.054	2.85709			21.5268	17.0794			0.19	0.6
9.92958	4.71244			26.7394	8.48483			0.27	0.18
11.2517	8.79618			89.1526	20.114			0.79	0.23
13.1251	5.91452			30.147	10.722			0.23	0.18
6.47856	8.96712			9.59492	20.1362			0.15	0.22
7.47486	4.95551			8.64112	8.44277			0.12	0.17
6.25842				7.24017				0.12
4.89186				10.5471				0.22
6.54852				6.85203				0.1
16.1838				24.4515				0.15
3.14687				12.9801				0.41
4.02716				18.4165				0.46
11.837				19.0494				0.16
11.9947				62.9541				0.52
5.67098				16.0257				0.28
11.9918				5.99947				0.05
8.0577				14.1642				0.18
10.5168				37.0076				0.35
15.2933				45.6957				0.3
12.409				6.56822				0.05
12.8416				37.7414				0.29
20.5871				8.21717				0.04
17.309				88.7611				0.51
14.4573				41.9872				0.29
6.73788				3.59632				0.05
5.69329				26.32				0.46
17.9152				36.5902				0.2
12.3777				39.5654				0.32
4.66138				15.0937				0.32
6.97944				10.0942				0.14
8.886				14.7074				0.17
13.2191				56.4435				0.43
6.8112				5.65933				0.08
7.46982				17.1163				0.23
8.84772				8.3421				0.09
16.2563				117.444				0.72
9.62178				19.8042				0.21
4.19836				15.7604				0.38
9.03816				18.4145				0.2
8.64972				52.9953				0.61
11.4683				32.502				0.28
13.8859				57.8959				0.42
8.80008				34.4723				0.39
16.0107				80.5812				0.5
6.41238				10.7571				0.17
7.55382				5.09528				0.07
11.6952				11.7295				0.1
5.66558				36.5926				0.65
10.0801				50.4334				0.5
16.6313				28.0591				0.17
11.2611				1.16233				0.01
6.9426				1.70619				0.02
6.33138				6.93564				0.11
8.78286				29.0908				0.33
16.8366				41.6202				0.25
12.3887				36.7653				0.3
17.2073				86.8209				0.5
5.55761				15.7555				0.28
6.68832				37.8053				0.57
9.2175				48.7233				0.53
9.41568				10.264				0.11
5.59678				19.0396				0.34
8.78892				3.8001				0.04
12.9937				33.4447				0.26
2.8448				7.81995				0.27
5.30967				14.8387				0.28
7.70376				13.6472				0.18
9.27618				22.5758				0.24
8.9787				11.8311				0.13
6.9069				20.9111				0.3
8.22012				9.6077				0.12
5.03379				14.3971				0.29
7.0281				13.4619				0.19
2.4369				2.49549				0.1
10.2325				17.5471				0.17
2.91086				7.42101				0.25
4.10009				6.33045				0.15
17.5596				108.398				0.62
10.4477				49.5425				0.47
6.23094				22.6125				0.36
7.05726				16.5187				0.23
9.67266				79.0871				0.82
11.4858				23.4812				0.2
6.47202				15.3722				0.24
9.32172				4.25868				0.05
9.75018				15.7269				0.16
8.0154				16.4385				0.21
11.6822				7.73653				0.07
6.28962				46.2411				0.74
12.9725				16.6592				0.13
5.47297				12.8115				0.23
5.98974				5.98576				0.1
16.1629				16.7346				0.1
8.72484				13.2172				0.15
11.245				21.485				0.19
7.18944				11.4037				0.16
3.27521				12.8285				0.39
9.93864				34.4212				0.35
7.58892				23.6807				0.31
7.30914				7.959				0.11
5.41787				9.08533				0.17
11.0858				95.6594				0.86
13.2303				57.2696				0.43
21.0368				95.9228				0.46
7.09212				11.5928				0.16
5.3803				12.495				0.23
15.553				71.7035				0.46
7.81986				21.9557				0.28
5.30444				40.3635				0.76
15.3209				67.1797				0.44
9.90552				7.59044				0.08
17.0869				91.2305				0.53
7.22646				25.3898				0.35
11.2339				29.6377				0.26
4.14215				16.4363				0.4
8.18868				26.2237				0.32
9.08688				14.7959				0.16
11.3381				19.7634				0.17
2.00926				6.90144				0.34
10.097				23.6858				0.23
12.5805				7.98398				0.06
6.27258				27.0695				0.43
4.14645				26.613				0.64
8.70072				30.6141				0.35
12.9408				67.2858				0.52
7.06236				5.55867				0.08
17.2554				38.9646				0.23
5.45678				7.24257				0.13
15.2137				36.4792				0.24
8.58012				31.3811				0.37
12.6651				11.0064				0.09
5.80825				4.33002				0.07
14.3899				22.4566				0.16
9.7098				6.32408				0.07
6.51102				21.2089				0.33
5.62685				26.4933				0.47
6.64272				6.41882				0.1
9.51				34.1563				0.36
15.9677				39.1743				0.25
8.33214				6.25611				0.08
5.6186				8.27608				0.15
7.11186				11.0672				0.16
14.3234				72.2147				0.5
4.95136				27.1534				0.55
11.7863				6.24449				0.05
4.99391				8.16486				0.16
22.7815				56.6656				0.25
12.996				92.8259				0.71
10.5913				14.7476				0.14
4.60417				15.9434				0.35
17.8816				18.9932				0.11
20.721				42.7545				0.21
13.2076				42.8745				0.32
6.05364				10.5786				0.17
11.5134				9.05514				0.08
6.82248				14.2389				0.21
7.01262				25.0866				0.36
5.79793				15.108				0.26
6.82026				15.2285				0.22
4.79718				12.3446				0.26
14.1789				44.6819				0.32
14.7679				52.7835				0.36
11.0078				54.0014				0.49
6.12516				14.0754				0.23
6.4725				14.3236				0.22
6.16416				13.4404				0.22
15.1684				23.6658				0.16
9.1884				29.5165				0.32
10.262				48.3983				0.47
9.8487				6.83402				0.07
9.53826				29.2902				0.31
9.56346				10.0631				0.11
6.89574				12.7736				0.19
8.31954				20.5796				0.25
9.0297				36.0989				0.4
17.5681				65.1271				0.37
3.24698				16.6374				0.51
8.9298				18.4897				0.21
7.40082				23.0546				0.31
11.4812				20.2618				0.18
10.0249				36.9078				0.37
11.3821				14.9146				0.13
7.6668				36.7511				0.48
4.9493				14.5198				0.29
6.43362				57.321				0.89
10.3806				66.2461				0.64
19.9128				84.8421				0.43
14.7125				93.7782				0.64
10.9384				32.7646				0.3
5.37838				37.5814				0.7
8.72286				44.2404				0.51
17.6011				34.3813				0.2
10.3577				49.7403				0.48
6.82554				36.1913				0.53
5.1275				16.8546				0.33
3.40567				7.53308				0.22
11.8146				33.2995				0.28
10.3776				2.45463				0.02
17.4651				30.4855				0.17
16.2476				87.1478				0.54
5.60371				34.0901				0.61
5.16332				10.8388				0.21
6.62412				55.7392				0.84
3.45328				21.8914				0.63
9.06672				24.5424				0.27
6.98622				36.7963				0.53
4.52702				17.0214				0.38

## Sheet: Figure 4F
Process Length																	Number of Branches
WT_pre	WT_post	WT_PSB_pre	WT_PSB_post	WT_MRS_pre	WT_MRS_post		Number of families	1									WT_pre	WT_post	WT_PSB_pre	WT_PSB_post	WT_MRS_pre	WT_MRS_post		Number of families	1
73.7358	73.8155	42.1053	65.7891	0	65.7891		Number of comparisons per family	3									5	5	2	3	0	3		Number of comparisons per family	3
86.9549	98.7642	13.539	10.5235	42.1053	10.5235		Alpha	0.05									5	9	1	1	2	1		Alpha	0.05
27.1344	36.9715	27.3208	54.7151	13.539	54.7151												2	2	2	4	1	4
112.884	372.281	0	0	27.3208	0		Tukey's multiple comparisons test	Mean Diff.	95.00% CI of diff.	Below threshold?	Summary	Adjusted P Value					4	13	0	0	2	0		Tukey's multiple comparisons test	Mean Diff.	95.00% CI of diff.	Below threshold?	Summary	Adjusted P Value
22.6272	26.3119	64.9701	16.1966	0	16.1966		WT_pre vs. WT_PSB_pre	15.22	3.571 to 26.88	Yes	**	0.0065	A-C				2	2	5	1	0	1		WT_pre vs. WT_PSB_pre	1.153	0.3849 to 1.921	Yes	**	0.0014	A-C
70.0414	56.8492	28.4987	64.3928	64.9701	64.3928		WT_pre vs. WT_MRS_pre	16.33	4.810 to 27.85	Yes	**	0.0028	A-E				5	5	2	5	5	5		WT_pre vs. WT_MRS_pre	1.219	0.4603 to 1.979	Yes	***	0.0006	A-E
15.7614	69.8708	0	73.3926	28.4987	73.3926		WT_PSB_pre vs. WT_MRS_pre	1.106	-10.05 to 12.27	No	ns	0.9703	C-E				1	2	0	5	2	5		WT_PSB_pre vs. WT_MRS_pre	0.06665	-0.6687 to 0.8020	No	ns	0.9751	C-E
14.9094	20.5053	0	8.41638	0	8.41638												1	2	0	1	0	1
32.7069	258.436	11.4674	0	0	0		Test details	Mean 1	Mean 2	Mean Diff.	SE of diff.	n1	n2	q	DF		3	11	1	0	0	0		Test details	Mean 1	Mean 2	Mean Diff.	SE of diff.	n1	n2	q	DF
21.4136	10.0026	18.0402	0	11.4674	0		WT_pre vs. WT_PSB_pre	41.08	25.86	15.22	4.94	70	79	4.358	229		1	1	1	0	1	0		WT_pre vs. WT_PSB_pre	2.786	1.633	1.153	0.3255	70	79	5.009	229
60.9777	36.5891	25.1989	0	0	0		WT_pre vs. WT_MRS_pre	41.08	24.75	16.33	4.884	70	83	4.729	229		4	2	2	0	0	0		WT_pre vs. WT_MRS_pre	2.786	1.566	1.219	0.3218	70	83	5.359	229
25.4832	16.4271	66.4019	49.9835	18.0402	49.9835		WT_PSB_pre vs. WT_MRS_pre	25.86	24.75	1.106	4.73	79	83	0.3307	229		2	1	5	3	1	3		WT_PSB_pre vs. WT_MRS_pre	1.633	1.566	0.06665	0.3117	79	83	0.3024	229
32.9019	0	0	0	25.1989	0												2	0	0	0	2	0
15.3238	0	67.6093	59.5067	66.4019	59.5067												1	0	3	4	5	4
0	155.65	0	0	0	0												0	12	0	0	0	0
0	69.9678	45.4468	0	67.6093	0												0	7	2	0	3	0
32.2865	112.337	108.951	0	0	0												3	7	6	0	0	0
19.8188	104.732	42.5318	48.9537	45.4468	48.9537												1	6	3	3	2	3
10.1387	58.971	0	97.7176	108.951	97.7176												1	5	0	7	6	7
0	92.4822	0	78.8279	42.5318	78.8279												0	5	0	5	3	5
0	0	30.0052	53.6473	0	53.6473												0	0	2	4	0	4
117.37	309.006	0	25.9686	0	25.9686												9	13	0	1	0	1
43.8839	33.7991	32.4104	19.4548	30.0052	19.4548												4	3	1	1	2	1
11.1034	102.062	61.8444	77.9465	0	77.9465												1	9	4	6	0	6
94.6259	20.1473	0	36.0093	0	36.0093												7	2	0	3	0	3
8.79516	58.2871	11.1095	50.513	32.4104	0												1	5	1	3	1	0
95.7917	32.6628	19.1973	0	61.8444	50.513												7	2	1	0	4	3
36.7105	119.413	72.5136	21.6477	0	0												4	8	5	1	0	0
53.363	70.181	16.3118	14.8323	11.1095	0												5	4	1	1	1	0
0	19.3248	29.5015	41.8956	19.1973	21.6477												0	1	1	2	1	1
165.298	0	65.8759	62.0688	72.5136	0												10	0	2	2	5	0
0	168.449	57.7281	95.2743	16.3118	41.8956												0	10	6	1	1	2
51.2681	80.9976	0	9.93759	29.5015	62.0688												2	5	0	1	1	2
15.7467	8.39556	19.635	85.9338	65.8759	95.2743												1	1	1	7	2	1
36.5363	107.818	28.744	47.4447	57.7281	9.93759												2	8	3	4	6	1
11.9528	57.5712	0	0	0	85.9338												1	4	0	0	0	7
0	17.7828	44.1007	27.5132	19.635	47.4447												0	2	3	2	1	4
20.6769	16.8597	8.27421	9.81624	28.744	0												2	1	1	1	3	0
13.175	8.12342	0	46.642	0	27.5132												1	1	0	4	0	2
0	192.269	0	36.3708	44.1007	9.81624												0	6	0	2	3	1
63.4722	37.6077	30.9516	0	8.27421	46.642												4	3	3	0	1	4
57.2402	50.0606	41.8453	36.8415	0	36.3708												5	1	3	2	0	2
20.4758	151.877	73.1757	0	84.4274	0												2	7	3	0	7	0
134.544	293.653	54.476	48.2195	0	36.8415												10	12	5	4	0	2
16.7617	73.7739	27.8062	0	73.1757	0												1	3	2	0	3	0
45.6747	174.829	0	84.1344	54.476	48.2195												4	10	0	3	5	4
76.7868	91.5835	0	60.8649	27.8062	0												4	6	0	6	2	0
86.9683	137.995	0	15.4537	0	84.1344												5	7	0	1	0	3
102.597	152.499	77.1767	0	0	60.8649												6	9	6	0	0	6
35.1304	12.7459	43.9697	114.722	0	15.4537												3	1	5	9	0	1
20.5347	24.1778	67.5834	50.4419	77.1767	0												2	2	4	4	6	0
34.5592	0	0	71.9988	0	114.722												1	0	0	5	0	9
18.6114	99.0733	24.0687	12.3672	43.9697	50.4419												1	6	1	1	5	4
10.4524	29.5554	0	29.5051	67.5834	71.9988												1	3	0	1	4	5
18.0402	79.4936	0	0	0	12.3672												1	6	0	0	0	1
52.543	108.952	0	0	24.0687	29.5051												3	6	0	0	1	1
103.826	35.1157	72.276	74.6284	0	0												7	4	2	4	0	0
77.4662	0	16.2554	0	0	0												5	0	1	0	0	0
21.1268	63.9185	0	19.3984	0	74.6284												1	5	0	1	0	4
47.3701	76.5111	18.7683	0	0	0												4	3	1	0	0	0
17.3893	107.171	0	0	72.276	19.3984												1	8	0	0	2	1
8.15896	33.6803	27.3294	9.63852	16.2554	0												1	3	2	1	1	0
36.1611	10.2453	0	50.9629	0	0												2	1	0	1	0	0
26.5216	57.4204	33.1862	0	18.7683	9.63852												2	3	2	0	1	1
42.438	33.7783	17.3329	48.7699	0	50.9629												3	3	1	3	0	1
78.9198	0	0	0	27.3294	0												5	0	0	0	2	0
98.8954	82.7112	53.558	0	0	48.7699												6	6	4	0	0	3
55.6479	20.5408	10.6449	18.4606	33.1862	0												4	2	1	1	2	0
16.0544	144.183	20.4048	28.7856	17.3329	0												1	9	2	2	1	0
0	206.959	0	0	0	18.4606												0	7	0	0	0	1
	47.9118	37.8615	0	53.558	28.7856													4	2	0	4	2
	11.0028	66.8787	26.6871	10.6449	0													1	3	2	1	0
	53.3006	0	79.0681	20.4048	0													2	0	3	2	0
	73.0752	15.2527	0	0	26.6871													3	1	0	0	2
	56.7745	0	22.6272	37.8615	79.0681													1	0	2	2	3
	69.0272	36.1723	0	66.8787	0													5	2	0	3	0
		56.0536	39.1375	0	22.6272														2	3	0	2
		25.5482	93.351	15.2527	0														2	3	1	0
		34.8521	10.6449	0	39.1375														2	1	0	3
			34.0738	36.1723	93.351															2	2	3
			9.14449	56.0536	10.6449															1	2	1
			13.7315	25.5482	34.0738															1	2	2
				34.8521	9.14449																2	1
					13.7315																	1
