# Supplementary material for: TREM2 regulates purinergic receptor-mediated calcium signaling and motility in human iPSC-derived microglia
Source: eLife. 2022 Feb 22;11:e73021. doi: 10.7554/eLife.73021 (PMC8906810; doi:10.7554/eLife.73021)
Supplement: Figure 5—source data 1. — In this dataset, the results of motility experiments and process extension in wild type (WT) and TREM2 KO cells, as well as baseline motility and directional persistence, are included. [file elife-73021-fig5-data1.xlsx]

## Sheet: Fig 5A
WT							KO
Frame	X	Y	Z	relative X	relative Y		Frame	X	Y	Z	relative X	relative Y
1	0	0	0	0	0		1	0	0	0	0	0
2	-0.0639038	0.234375	0	-0.0639038	0.234375		2	0.209778	0.173401	0	0.209778	0.173401
3	-1.12665	0.721069	0	-1.12665	0.721069		3	1.14825	0.659851	0	1.14825	0.659851
4	-0.495911	0.483032	0	-0.495911	0.483032		4	1.68561	0.200073	0	1.68561	0.200073
5	-0.292053	1.66425	0	-0.292053	1.66425		5	1.18396	0.0252075	0	1.18396	0.0252075
6	-1.77856	0.721069	0	-1.77856	0.721069		6	1.37128	0.0178223	0	1.37128	0.0178223
7	-0.0177002	0.74176	0	-0.0177002	0.74176		7	1.61761	-0.201172	0	1.61761	-0.201172
8	-0.837402	0.369019	0	-0.837402	0.369019		8	1.45233	-0.723755	0	1.45233	-0.723755
9	-0.100281	0.979736	0	-0.100281	0.979736		9	1.5116	-0.0747681	0	1.5116	-0.0747681
11	-1.927	0.690125	0	-1.927	0.690125		10	1.35834	-0.340454	0	1.35834	-0.340454
20	-0.658081	1.85992	0	-0.658081	1.85992		11	0.791199	-0.26886	0	0.791199	-0.26886
21	-1.00323	1.48407	0	-1.00323	1.48407		12	-0.20813	-0.124451	0	-0.20813	-0.124451
22	-0.749451	1.46283	0	-0.749451	1.46283		13	0.235901	-0.142578	0	0.235901	-0.142578
24	0.261475	2.76111	0	0.261475	2.76111		14	1.93976	-0.495544	0	1.93976	-0.495544
25	0.575134	2.45325	0	0.575134	2.45325		15	1.00012	-0.242615	0	1.00012	-0.242615
26	1.18988	3.4848	0	1.18988	3.4848		16	0.16687	-0.120605	0	0.16687	-0.120605
27	1.42999	3.41656	0	1.42999	3.41656		17	-0.454163	-0.186279	0	-0.454163	-0.186279
29	2.6366	3.71027	0	2.6366	3.71027		18	-0.874817	-0.361206	0	-0.874817	-0.361206
30	3.04303	3.22064	0	3.04303	3.22064		19	-0.897156	0.172363	0	-0.897156	0.172363
31	3.21472	2.69983	0	3.21472	2.69983		20	-0.132324	0.0377808	0	-0.132324	0.0377808
32	3.36469	2.73553	0	3.36469	2.73553		21	-1.19464	0.0465698	0	-1.19464	0.0465698
33	3.65472	2.6264	0	3.65472	2.6264		22	-1.31989	0.282654	0	-1.31989	0.282654
34	5.0614	2.91669	0	5.0614	2.91669		23	-1.82001	0.256714	0	-1.82001	0.256714
35	6.24078	2.81763	0	6.24078	2.81763		24	-1.49994	0.36969	0	-1.49994	0.36969
36	6.43787	3.34418	0	6.43787	3.34418		25	-1.01617	0.255676	0	-1.01617	0.255676
37	7.04724	3.1601	0	7.04724	3.1601		26	-1.8222	0.315125	0	-1.8222	0.315125
38	7.80096	3.65033	0	7.80096	3.65033		27	-1.90582	0.739136	0	-1.90582	0.739136
39	8.10748	3.47864	0	8.10748	3.47864		28	-1.52417	0.861328	0	-1.52417	0.861328
40	9.19226	4.03564	0	9.19226	4.03564		29	-1.57129	0.224792	0	-1.57129	0.224792
41	9.56012	4.00287	0	9.56012	4.00287		30	-1.66949	0.401794	0	-1.66949	0.401794
42	10.788	5.03717	0	10.788	5.03717		31	-1.21875	1.12268	0	-1.21875	1.12268
43	12.4518	5.05676	0	12.4518	5.05676		32	-1.23663	1.01501	0	-1.23663	1.01501
44	13.6181	4.69055	0	13.6181	4.69055		33	-0.830566	0.866943	0	-0.830566	0.866943
45	14.0624	5.04877	0	14.0624	5.04877		34	-0.486023	0.523865	0	-0.486023	0.523865
46	14.5792	5.13312	0	14.5792	5.13312		35	-0.299255	0.114075	0	-0.299255	0.114075
47	15.7471	5.7312	0	15.7471	5.7312		36	0.278992	0.0379639	0	0.278992	0.0379639
48	16.3856	6.56866	0	16.3856	6.56866		37	0.555725	0.071106	0	0.555725	0.071106
49	17.0504	7.27576	0	17.0504	7.27576		38	0.509888	-0.00140381	0	0.509888	-0.00140381
50	18.303	7.28546	0	18.303	7.28546		39	0.864807	-0.346741	0	0.864807	-0.346741
51	19.5519	6.94641	0	19.5519	6.94641		40	1.4729	-0.683289	0	1.4729	-0.683289
52	22.1431	6.82001	0	22.1431	6.82001		41	1.57794	-0.40094	0	1.57794	-0.40094
53	23.5307	5.66077	0	23.5307	5.66077		42	2.12665	-0.557739	0	2.12665	-0.557739
54	24.1349	5.93707	0	24.1349	5.93707		43	2.38678	-0.662537	0	2.38678	-0.662537
55	24.479	4.1947	0	24.479	4.1947		44	2.9751	-0.195496	0	2.9751	-0.195496
56	26.1335	2.38928	0	26.1335	2.38928		45	3.4718	0.742126	0	3.4718	0.742126
57	22.8298	2.6026	0	22.8298	2.6026		46	3.67572	-0.529907	0	3.67572	-0.529907
58	22.7108	3.79248	0	22.7108	3.79248		47	4.38696	-0.302124	0	4.38696	-0.302124
59	24.3236	4.43066	0	24.3236	4.43066		48	3.79413	-0.886658	0	3.79413	-0.886658
60	25.4928	4.58691	0	25.4928	4.58691		49	4.3468	-0.806702	0	4.3468	-0.806702
61	28.7397	5.33923	0	28.7397	5.33923		50	4.5177	-1.35162	0	4.5177	-1.35162
62	30.8893	7.05615	0	30.8893	7.05615		51	4.90485	-1.23706	0	4.90485	-1.23706
63	33.3137	9.22894	0	33.3137	9.22894		52	4.46472	-1.96814	0	4.46472	-1.96814
64	35.1888	8.46814	0	35.1888	8.46814		53	5.36249	-1.91516	0	5.36249	-1.91516
65	38.4692	11.1471	0	38.4692	11.1471		54	5.44098	-1.72559	0	5.44098	-1.72559
66	40.8964	10.9557	0	40.8964	10.9557		55	5.96588	-1.6106	0	5.96588	-1.6106
67	43.7171	11.1504	0	43.7171	11.1504		56	6.16028	-1.50171	0	6.16028	-1.50171
68	46.3418	10.8665	0	46.3418	10.8665		57	6.36462	-1.87073	0	6.36462	-1.87073
69	48.3918	9.65582	0	48.3918	9.65582		58	6.27765	-2.04309	0	6.27765	-2.04309
70	50.9825	8.06445	0	50.9825	8.06445		59	7.39008	-2.22821	0	7.39008	-2.22821
71	52.3844	6.74756	0	52.3844	6.74756		60	7.42072	-2.29822	0	7.42072	-2.29822
72	54.2324	3.78186	0	54.2324	3.78186		61	7.41345	-1.61877	0	7.41345	-1.61877
73	55.84	1.21265	0	55.84	1.21265		62	8.39813	-2.38678	0	8.39813	-2.38678
74	57.353	1.44067	0	57.353	1.44067		63	8.95367	-2.67218	0	8.95367	-2.67218
75	57.2396	1.59717	0	57.2396	1.59717		64	9.36194	-2.41882	0	9.36194	-2.41882
76	56.8571	2.98352	0	56.8571	2.98352		65	10.0358	-2.65973	0	10.0358	-2.65973
77	56.4126	2.979	0	56.4126	2.979		66	10.4125	-2.74554	0	10.4125	-2.74554
78	57.067	3.1853	0	57.067	3.1853		67	10.7154	-2.65961	0	10.7154	-2.65961
79	56.6644	2.0036	0	56.6644	2.0036		68	11.311	-3.10229	0	11.311	-3.10229
80	54.6944	0.622925	0	54.6944	0.622925		69	11.2691	-3.26965	0	11.2691	-3.26965
81	55.0566	-0.908447	0	55.0566	-0.908447		70	11.9509	-3.59943	0	11.9509	-3.59943
82	57.3831	-2.3822	0	57.3831	-2.3822		71	12.4414	-3.70526	0	12.4414	-3.70526
83	56.0958	-1.90295	0	56.0958	-1.90295		72	12.732	-3.53174	0	12.732	-3.53174
84	55.9601	-6.80615	0	55.9601	-6.80615		73	12.9922	-4.0401	0	12.9922	-4.0401
85	56.62	-10.2458	0	56.62	-10.2458		74	13.1506	-3.73285	0	13.1506	-3.73285
86	58.5051	-9.38129	0	58.5051	-9.38129		75	13.2739	-4.11371	0	13.2739	-4.11371
87	57.7069	-9.32361	0	57.7069	-9.32361		76	13.5004	-4.2348	0	13.5004	-4.2348
88	57.5759	-8.64337	0	57.5759	-8.64337		77	13.5861	-4.43213	0	13.5861	-4.43213
89	56.3215	-7.94641	0	56.3215	-7.94641		78	13.7841	-4.44196	0	13.7841	-4.44196
90	54.5305	-6.81616	0	54.5305	-6.81616		79	13.8098	-5.1441	0	13.8098	-5.1441
91	54.6616	-5.00073	0	54.6616	-5.00073		80	14.131	-5.53888	0	14.131	-5.53888
92	54.9161	-2.62384	0	54.9161	-2.62384		81	14.4534	-5.90942	0	14.4534	-5.90942
93	55.0609	0.574097	0	55.0609	0.574097		82	14.795	-5.71259	0	14.795	-5.71259
94	55.08	2.22137	0	55.08	2.22137		83	15.1553	-6.17938	0	15.1553	-6.17938
95	55.4901	0.946533	0	55.4901	0.946533		84	15.5751	-2.24408	0	15.5751	-2.24408
96	58.0358	0.264465	0	58.0358	0.264465		85	15.8318	-2.78949	0	15.8318	-2.78949
97	59.951	0.474976	0	59.951	0.474976		86	15.4359	-3.10107	0	15.4359	-3.10107
98	61.8735	0.453796	0	61.8735	0.453796		87	16.2972	-7.49188	0	16.2972	-7.49188
99	63.6394	1.01428	0	63.6394	1.01428		88	16.0576	-7.29834	0	16.0576	-7.29834
100	65.8137	0.286011	0	65.8137	0.286011		89	16.1993	-8.19232	0	16.1993	-8.19232
101	66.7202	0.623962	0	66.7202	0.623962		90	16.5998	-8.29626	0	16.5998	-8.29626
102	66.4807	-2.18658	0	66.4807	-2.18658		91	16.7178	-8.97571	0	16.7178	-8.97571
103	66.8253	-2.22437	0	66.8253	-2.22437		92	16.5548	-8.99646	0	16.5548	-8.99646
104	66.9933	-1.19843	0	66.9933	-1.19843		93	16.7798	-9.84564	0	16.7798	-9.84564
105	66.3604	-2.12	0	66.3604	-2.12		94	17.7881	-10.5693	0	17.7881	-10.5693
106	66.1799	-0.836365	0	66.1799	-0.836365		95	17.4175	-11.1234	0	17.4175	-11.1234
107	65.6609	-1.84302	0	65.6609	-1.84302		96	17.7442	-10.9471	0	17.7442	-10.9471
108	67.96	-6.92975	0	67.96	-6.92975		97	16.9604	-6.7951	0	16.9604	-6.7951
109	63.6464	-4.14966	0	63.6464	-4.14966		98	17.7592	-12.1325	0	17.7592	-12.1325
110	61.1721	-3.91632	0	61.1721	-3.91632		99	17.058	-12.22	0	17.058	-12.22
111	60.7946	-3.7934	0	60.7946	-3.7934		100	16.7254	-12.6473	0	16.7254	-12.6473
112	60.165	-1.71515	0	60.165	-1.71515		101	17.2161	-13.7549	0	17.2161	-13.7549
113	60.4023	0.376099	0	60.4023	0.376099		102	17.4309	-14.1764	0	17.4309	-14.1764
114	60.4151	1.49646	0	60.4151	1.49646		103	17.694	-14.1694	0	17.694	-14.1694
115	60.3529	2.21814	0	60.3529	2.21814		104	17.4822	-13.9687	0	17.4822	-13.9687
116	60.0045	2.39246	0	60.0045	2.39246		105	17.882	-14.4743	0	17.882	-14.4743
117	61.3504	3.98688	0	61.3504	3.98688		106	18.1879	-14.6829	0	18.1879	-14.6829
118	61.8598	5.81659	0	61.8598	5.81659		107	18.1804	-15.1289	0	18.1804	-15.1289
119	62.93	6.17145	0	62.93	6.17145		108	18.1304	-15.0457	0	18.1304	-15.0457
120	62.8612	6.84875	0	62.8612	6.84875		109	18.7269	-16.1916	0	18.7269	-16.1916
121	62.9833	7.78278	0	62.9833	7.78278		110	18.6561	-17.0539	0	18.6561	-17.0539
122	62.6444	8.27008	0	62.6444	8.27008		111	18.954	-18.4805	0	18.954	-18.4805
123	62.9922	8.35559	0	62.9922	8.35559		112	19.3807	-19.2282	0	19.3807	-19.2282
124	63.0029	8.77478	0	63.0029	8.77478		113	19.5123	-19.9187	0	19.5123	-19.9187
125	63.0522	7.9314	0	63.0522	7.9314		114	19.8476	-20.0131	0	19.8476	-20.0131
126	62.9119	8.02063	0	62.9119	8.02063		115	20.8535	-20.4168	0	20.8535	-20.4168
127	63.0858	8.09393	0	63.0858	8.09393		116	22.1276	-20.5464	0	22.1276	-20.5464
128	63.2677	7.72412	0	63.2677	7.72412		117	22.8968	-20.9789	0	22.8968	-20.9789
129	63.3828	8.42993	0	63.3828	8.42993		118	23.7995	-21.6667	0	23.7995	-21.6667
130	63.7069	9.29132	0	63.7069	9.29132		119	23.8843	-23.0419	0	23.8843	-23.0419
131	61.4349	4.91608	0	61.4349	4.91608		120	24.3046	-23.9877	0	24.3046	-23.9877
132	61.2825	3.95496	0	61.2825	3.95496		121	25.3646	-25.348	0	25.3646	-25.348
133	61.2333	3.79688	0	61.2333	3.79688		122	25.7702	-22.9861	0	25.7702	-22.9861
134	63.104	6.17047	0	63.104	6.17047		123	25.8649	-24.2001	0	25.8649	-24.2001
135	63.7386	5.84338	0	63.7386	5.84338		124	13.932	-26.5106	0	13.932	-26.5106
136	63.1922	4.4071	0	63.1922	4.4071		134	9.13458	-30.1414	0	9.13458	-30.1414
1	0	0	0	0	0		135	8.66437	-30.6254	0	8.66437	-30.6254
2	-0.0119629	-0.146301	0	-0.0119629	-0.146301		136	8.18115	-28.9591	0	8.18115	-28.9591
3	0.216675	0.335815	0	0.216675	0.335815		139	7.03241	-27.9736	0	7.03241	-27.9736
4	0.248596	0.210632	0	0.248596	0.210632		140	7.38635	-28.3456	0	7.38635	-28.3456
5	0.648987	0.29425	0	0.648987	0.29425		142	5.84424	-28.408	0	5.84424	-28.408
6	1.08124	-0.589294	0	1.08124	-0.589294		143	5.60492	-28.4052	0	5.60492	-28.4052
7	0.460999	-0.482056	0	0.460999	-0.482056		144	5.42523	-26.7965	0	5.42523	-26.7965
8	0.777832	-0.591553	0	0.777832	-0.591553		145	5.20325	-25.0541	0	5.20325	-25.0541
9	1.55457	-0.368225	0	1.55457	-0.368225		1	0	0	0	0	0
10	0.956177	-0.732788	0	0.956177	-0.732788		2	-0.76416	1.26337	0	-0.76416	1.26337
11	0.0635376	-0.516113	0	0.0635376	-0.516113		3	-0.462158	0.212219	0	-0.462158	0.212219
12	0.36554	-0.695557	0	0.36554	-0.695557		4	-0.886414	0.58075	0	-0.886414	0.58075
13	0.617859	-0.656677	0	0.617859	-0.656677		5	-1.36249	-0.916565	0	-1.36249	-0.916565
14	0.663147	-1.52509	0	0.663147	-1.52509		6	-0.611328	1.76257	0	-0.611328	1.76257
15	0.782837	-1.33917	0	0.782837	-1.33917		7	1.1402	1.52704	0	1.1402	1.52704
16	-0.865356	-1.49969	0	-0.865356	-1.49969		8	1.29071	3.10394	0	1.29071	3.10394
17	-1.05316	-0.718506	0	-1.05316	-0.718506		9	1.03888	2.34174	0	1.03888	2.34174
18	-1.38037	-1.55469	0	-1.38037	-1.55469		10	-0.507629	1.3269	0	-0.507629	1.3269
19	-1.72046	-1.63129	0	-1.72046	-1.63129		11	-3.08673	0.358276	0	-3.08673	0.358276
20	-1.63898	-1.86224	0	-1.63898	-1.86224		12	-1.99304	1.18048	0	-1.99304	1.18048
21	-1.75171	-2.18671	0	-1.75171	-2.18671		13	-1.43085	0.784668	0	-1.43085	0.784668
22	-2.66052	-1.76276	0	-2.66052	-1.76276		14	-1.72821	-0.179504	0	-1.72821	-0.179504
23	3.17682	-11.6829	0	3.17682	-11.6829		15	-2.36993	0.279541	0	-2.36993	0.279541
23	-4.2113	0.813416	0	0	0		16	-2.58215	-0.115234	0	-2.58215	-0.115234
24	-12.7745	2.60272	0	-8.5632	1.7893		17	-2.21014	-0.113037	0	-2.21014	-0.113037
24	1.68292	-3.92383	0	0	0		18	-3.2005	-0.363464	0	-3.2005	-0.363464
25	-1.80652	-2.52344	0	-3.48944	1.40039		19	-2.83551	1.69189	0	-2.83551	1.69189
26	-2.66705	-2.41522	0	-4.34997	1.50861		20	-3.01245	1.82568	0	-3.01245	1.82568
27	-2.58173	-2.25916	0	-4.26465	1.66467		21	-2.41888	2.82111	0	-2.41888	2.82111
28	-2.49054	-2.54352	0	-4.17346	1.38031		22	-1.70117	2.75879	0	-1.70117	2.75879
29	-2.43927	-2.98169	0	-4.12219	0.94214		23	-2.38232	2.73029	0	-2.38232	2.73029
30	-13.3308	2.44568	0	-15.0137	6.36951		24	-2.37006	3.86774	0	-2.37006	3.86774
30	0.97522	-4.47919	0	0	0		25	-2.26508	4.47668	0	-2.26508	4.47668
31	-3.17212	-2.61053	0	-4.14734	1.86866		26	-2.31647	4.35339	0	-2.31647	4.35339
32	-3.17365	-2.46124	0	-4.14887	2.01795		27	-1.25842	4.29181	0	-1.25842	4.29181
33	-3.31036	-2.34125	0	-4.28558	2.13794		28	-1.46417	3.81506	0	-1.46417	3.81506
34	-2.9671	-2.72058	0	-3.94232	1.75861		29	-1.5675	3.68658	0	-1.5675	3.68658
35	-3.28302	-2.85657	0	-4.25824	1.62262		30	-0.483398	3.44104	0	-0.483398	3.44104
36	-3.34723	-2.80499	0	-4.32245	1.6742		31	0.28064	4.11389	0	0.28064	4.11389
37	-3.44165	-2.89569	0	-4.41687	1.5835		32	-0.389771	3.1936	0	-0.389771	3.1936
38	-4.04254	-2.41296	0	-5.01776	2.06623		33	0.210632	3.38318	0	0.210632	3.38318
39	-3.7627	-1.81519	0	-4.73792	2.664		34	0.954224	3.72913	0	0.954224	3.72913
40	-3.87964	-1.68207	0	-4.85486	2.79712		35	0.811829	2.9646	0	0.811829	2.9646
41	-3.80066	-1.80402	0	-4.77588	2.67517		36	0.799011	2.68518	0	0.799011	2.68518
42	-4.24384	-1.74042	0	-5.21906	2.73877		37	0.867798	1.83362	0	0.867798	1.83362
43	-4.23248	-1.51624	0	-5.2077	2.96295		38	1.00989	1.45331	0	1.00989	1.45331
44	-4.74066	-1.02979	0	-5.71588	3.4494		39	1.56439	1.60486	0	1.56439	1.60486
45	-5.02069	-1.57617	0	-5.99591	2.90302		40	2.46997	1.24274	0	2.46997	1.24274
46	-5.95618	-1.15448	0	-6.9314	3.32471		41	1.53674	1.50897	0	1.53674	1.50897
47	-6.00153	-1.38745	0	-6.97675	3.09174		42	1.14124	1.00049	0	1.14124	1.00049
48	-6.15802	-1.69672	0	-7.13324	2.78247		43	1.05481	0.516968	0	1.05481	0.516968
49	-6.79388	-1.2558	0	-7.7691	3.22339		44	0.834229	0.702637	0	0.834229	0.702637
50	-6.43207	-1.12415	0	-7.40729	3.35504		45	1.0022	0.624207	0	1.0022	0.624207
51	-6.95081	-0.360718	0	-7.92603	4.11847		46	0.94043	0.397705	0	0.94043	0.397705
52	-7.08014	-0.393982	0	-8.05536	4.08521		47	0.515259	0.658386	0	0.515259	0.658386
53	-6.6012	-1.01984	0	-7.57642	3.45935		48	0.954407	0.865112	0	0.954407	0.865112
54	-6.54456	-1.20331	0	-7.51978	3.27588		49	0.5896	0.339661	0	0.5896	0.339661
55	-6.44183	-1.48096	0	-7.41705	2.99823		50	-0.0888062	0.354553	0	-0.0888062	0.354553
56	-2.70306	-0.786804	0	-3.67828	3.69239		51	0.842163	0.696106	0	0.842163	0.696106
57	-3.80042	-1.25275	0	-4.77564	3.22644		52	0.578979	0.26532	0	0.578979	0.26532
58	-7.04047	-1.82855	0	-8.01569	2.65064		53	0.632202	0.2547	0	0.632202	0.2547
59	-7.15186	-2.04688	0	-8.12708	2.43231		54	0.94574	0.00610352	0	0.94574	0.00610352
60	-6.69312	-2.14465	0	-7.66834	2.33454		55	0.713501	0.289246	0	0.713501	0.289246
61	-7.315	-2.29736	0	-8.29022	2.18183		56	0.429382	0.751892	0	0.429382	0.751892
62	-7.30499	-2.4118	0	-8.28021	2.06739		57	0.397522	0.657837	0	0.397522	0.657837
63	-7.24536	-2.42072	0	-8.22058	2.05847		58	0.854492	0.787415	0	0.854492	0.787415
64	-6.4563	-2.61786	0	-7.43152	1.86133		59	0.563354	0.847168	0	0.563354	0.847168
65	-6.87219	-2.28998	0	-7.84741	2.18921		60	0.450439	0.516968	0	0.450439	0.516968
66	-6.74445	-2.96655	0	-7.71967	1.51264		61	0.319092	1.56488	0	0.319092	1.56488
67	-6.07355	-3.41315	0	-7.04877	1.06604		62	0.926758	1.84662	0	0.926758	1.84662
68	-7.01007	-3.46936	0	-7.98529	1.00983		63	0.997803	0.722229	0	0.997803	0.722229
69	-6.47998	-3.96936	0	-7.4552	0.50983		64	1.12299	0.87616	0	1.12299	0.87616
70	-6.53015	-3.9776	0	-7.50537	0.50159		65	0.918945	0.732788	0	0.918945	0.732788
71	-7.81024	-4.55188	0	-8.78546	-0.07269		66	0.633301	0.811096	0	0.633301	0.811096
72	-7.86639	-4.79944	0	-8.84161	-0.32025		67	0.808472	0.837708	0	0.808472	0.837708
73	-7.78925	-5.09033	0	-8.76447	-0.61114		68	1.021	0.709717	0	1.021	0.709717
74	-7.99304	-5.47314	0	-8.96826	-0.99395		69	0.688049	0.343506	0	0.688049	0.343506
75	-8.10638	-5.99799	0	-9.0816	-1.5188		70	0.775452	0.331726	0	0.775452	0.331726
76	-8.22412	-6.05212	0	-9.19934	-1.57293		71	0.109009	0.614502	0	0.109009	0.614502
77	-7.54456	-6.26575	0	-8.51978	-1.78656		72	1.05334	0.149353	0	1.05334	0.149353
78	-7.58704	-6.51642	0	-8.56226	-2.03723		73	0.335449	0.650696	0	0.335449	0.650696
79	-8.00311	-6.64594	0	-8.97833	-2.16675		74	1.39142	0.749695	0	1.39142	0.749695
80	-7.80115	-7.37061	0	-8.77637	-2.89142		75	1.17755	0.734436	0	1.17755	0.734436
81	-8.01355	-7.37994	0	-8.98877	-2.90075		76	0.962463	1.5307	0	0.962463	1.5307
82	-7.77887	-6.86096	0	-8.75409	-2.38177		77	0.974976	0.847656	0	0.974976	0.847656
83	-7.81262	-6.98676	0	-8.78784	-2.50757		78	1.19934	0.516357	0	1.19934	0.516357
84	-7.98218	-6.65631	0	-8.9574	-2.17712		79	1.12787	0.496399	0	1.12787	0.496399
85	-8.43958	-6.84375	0	-9.4148	-2.36456		80	1.42053	0.0771484	0	1.42053	0.0771484
86	-8.68884	-6.73413	0	-9.66406	-2.25494		81	1.46228	0.559326	0	1.46228	0.559326
87	-8.59882	-6.91345	0	-9.57404	-2.43426		82	1.59973	1.23297	0	1.59973	1.23297
88	-7.4939	-6.50555	0	-8.46912	-2.02636		83	2.13672	1.42664	0	2.13672	1.42664
89	-9.11407	-7.31732	0	-10.0893	-2.83813		84	1.93616	1.15106	0	1.93616	1.15106
90	-9.35236	-6.95184	0	-10.3276	-2.47265		85	2.03387	1.72369	0	2.03387	1.72369
91	-8.70178	-7.51599	0	-9.677	-3.0368		86	1.65894	0.593689	0	1.65894	0.593689
92	-8.95898	-7.56763	0	-9.9342	-3.08844		87	2.37567	0.20459	0	2.37567	0.20459
93	-8.86224	-7.61749	0	-9.83746	-3.1383		88	2.24231	0.314392	0	2.24231	0.314392
94	-8.35504	-8.11163	0	-9.33026	-3.63244		89	1.84454	0.433716	0	1.84454	0.433716
95	-8.20886	-8.18054	0	-9.18408	-3.70135		90	1.16833	-2.2738	0	1.16833	-2.2738
96	-8.22076	-8.18677	0	-9.19598	-3.70758		91	1.66644	0.419678	0	1.66644	0.419678
97	-8.19281	-8.47308	0	-9.16803	-3.99389		92	1.11621	1.54596	0	1.11621	1.54596
98	-7.88763	-8.35773	0	-8.86285	-3.87854		93	1.19775	1.42987	0	1.19775	1.42987
99	-8.08295	-8.65314	0	-9.05817	-4.17395		94	2.38947	0.972595	0	2.38947	0.972595
100	-7.99811	-8.74353	0	-8.97333	-4.26434		95	2.73993	1.78949	0	2.73993	1.78949
101	-7.92737	-9.0517	0	-8.90259	-4.57251		96	2.20129	0.974915	0	2.20129	0.974915
102	-8.09674	-8.75067	0	-9.07196	-4.27148		97	1.15594	0.826477	0	1.15594	0.826477
103	-8.19836	-8.974	0	-9.17358	-4.49481		98	1.27148	0.75647	0	1.27148	0.75647
104	-8.00995	-8.5932	0	-8.98517	-4.11401		99	2.08307	1.11786	0	2.08307	1.11786
105	-8.22351	-8.73218	0	-9.19873	-4.25299		100	1.08313	0.633484	0	1.08313	0.633484
106	-8.48309	-9.00177	0	-9.45831	-4.52258		101	2.65948	1.15051	0	2.65948	1.15051
107	-8.80328	-9.68042	0	-9.7785	-5.20123		102	3.01257	2.37201	0	3.01257	2.37201
108	-7.67487	-10.0071	0	-8.65009	-5.52791		103	2.73669	1.8139	0	2.73669	1.8139
109	-7.17938	-10.4483	0	-8.1546	-5.96911		104	3.16052	1.82703	0	3.16052	1.82703
110	-7.18311	-11.0588	0	-8.15833	-6.57961		105	3.2923	1.75452	0	3.2923	1.75452
111	-6.7453	-10.9113	0	-7.72052	-6.43211		106	1.83307	1.69617	0	1.83307	1.69617
112	-6.68262	-10.4468	0	-7.65784	-5.96761		107	2.59308	1.72272	0	2.59308	1.72272
113	-5.92932	-10.5877	0	-6.90454	-6.10851		108	2.69678	1.29791	0	2.69678	1.29791
114	-5.54559	-10.1171	0	-6.52081	-5.63791		109	1.7738	1.14807	0	1.7738	1.14807
115	-5.97272	-10.2078	0	-6.94794	-5.72861		110	0.669739	0.701233	0	0.669739	0.701233
116	-5.2666	-10.2632	0	-6.24182	-5.78401		111	2.16907	0.998047	0	2.16907	0.998047
117	-4.42426	-10.0763	0	-5.39948	-5.59711		112	1.94891	1.4856	0	1.94891	1.4856
118	-4.75793	-10.3698	0	-5.73315	-5.89061		113	2.17517	1.35425	0	2.17517	1.35425
119	-4.38837	-10.0012	0	-5.36359	-5.52201		114	1.61841	0.125244	0	1.61841	0.125244
120	-4.06421	-10.5259	0	-5.03943	-6.04671		115	1.77655	0.053833	0	1.77655	0.053833
121	-4.05243	-10.3958	0	-5.02765	-5.91661		116	0.910217	0.55603	0	0.910217	0.55603
122	-4.23969	-11.0305	0	-5.21491	-6.55131		117	1.19257	-0.450745	0	1.19257	-0.450745
123	-4.45557	-10.8875	0	-5.43079	-6.40831		118	1.54443	0.119324	0	1.54443	0.119324
124	-3.71979	-10.9194	0	-4.69501	-6.44021		119	1.46533	-0.383911	0	1.46533	-0.383911
125	-3.34302	-10.4369	0	-4.31824	-5.95771		120	1.64575	-0.712036	0	1.64575	-0.712036
126	-3.27704	-10.586	0	-4.25226	-6.10681		121	2.13812	-0.28125	0	2.13812	-0.28125
127	-2.27509	-10.4378	0	-3.25031	-5.95861		122	2.54456	-0.0150146	0	2.54456	-0.0150146
128	-1.81921	-10.6525	0	-2.79443	-6.17331		123	3.11914	0.336792	0	3.11914	0.336792
129	-2.59363	-11.9365	0	-3.56885	-7.45731		124	5.45624	-1.21674	0	5.45624	-1.21674
130	-1.78265	-11.5892	0	-2.75787	-7.11001		125	5.51666	-1.09894	0	5.51666	-1.09894
131	-2.198	-11.1064	0	-3.17322	-6.62721		126	5.66284	0.237305	0	5.66284	0.237305
132	-2.15826	-11.4811	0	-3.13348	-7.00191		127	5.9458	1.2843	0	5.9458	1.2843
133	-2.60095	-10.8759	0	-3.57617	-6.39671		128	6.43134	2.36401	0	6.43134	2.36401
134	-1.89825	-10.3791	0	-2.87347	-5.89991		129	5.46802	1.96979	0	5.46802	1.96979
135	-2.25336	-11.7284	0	-3.22858	-7.24921		130	6.0816	1.38226	0	6.0816	1.38226
136	-1.22339	-12.554	0	-2.19861	-8.07481		131	4.78644	0.756226	0	4.78644	0.756226
1	0	0	0	0	0		132	5.23816	0.756042	0	5.23816	0.756042
2	0.283936	-0.427979	0	0.283936	-0.427979		133	7.44141	1.61218	0	7.44141	1.61218
3	0.13446	0.496948	0	0.13446	0.496948		134	7.00421	0.557068	0	7.00421	0.557068
4	-0.120911	0.248169	0	-0.120911	0.248169		135	6.20551	1.19159	0	6.20551	1.19159
5	-0.604553	-0.656067	0	-0.604553	-0.656067		136	5.22949	1.52802	0	5.22949	1.52802
6	-0.299438	-0.115173	0	-0.299438	-0.115173		137	4.86279	1.54132	0	4.86279	1.54132
7	0.0949707	-0.531799	0	0.0949707	-0.531799		138	5.03857	1.76477	0	5.03857	1.76477
8	-1.02832	0.540222	0	-1.02832	0.540222		139	5.18231	1.23706	0	5.18231	1.23706
9	-0.0866089	0.663574	0	-0.0866089	0.663574		140	4.66931	0.716675	0	4.66931	0.716675
10	-0.908997	0.733032	0	-0.908997	0.733032		141	4.53571	0.549072	0	4.53571	0.549072
11	-1.33417	1.16888	0	-1.33417	1.16888		142	4.1264	-0.271606	0	4.1264	-0.271606
12	-3.15613	0.199524	0	-3.15613	0.199524		143	3.91364	0.1427	0	3.91364	0.1427
13	-3.13422	0.816467	0	-3.13422	0.816467		144	2.9458	0.242249	0	2.9458	0.242249
16	-4.2334	-0.419617	0	-4.2334	-0.419617		145	2.57471	-0.242493	0	2.57471	-0.242493
17	-4.12946	-0.575073	0	-4.12946	-0.575073		1	0	0	0	0	0
18	-4.09283	0.0316772	0	-4.09283	0.0316772		2	-0.476379	0.358826	0	-0.476379	0.358826
19	-4.05487	-0.704651	0	-4.05487	-0.704651		3	-0.407288	0.598022	0	-0.407288	0.598022
20	-4.07483	-0.8526	0	-4.07483	-0.8526		4	-1.0719	0.589539	0	-1.0719	0.589539
21	-4.26099	-0.433594	0	-4.26099	-0.433594		5	-1.12665	0.498779	0	-1.12665	0.498779
22	-4.11688	-0.483215	0	-4.11688	-0.483215		6	-0.989624	0.306702	0	-0.989624	0.306702
23	-4.81134	-0.849121	0	-4.81134	-0.849121		7	-1.12311	0.17511	0	-1.12311	0.17511
24	-4.56042	-0.726379	0	-4.56042	-0.726379		8	-1.69342	-0.0367432	0	-1.69342	-0.0367432
25	-4.44879	-0.865234	0	-4.44879	-0.865234		9	-1.25317	0.0183716	0	-1.25317	0.0183716
26	-5.07007	-0.968689	0	-5.07007	-0.968689		10	-1.23102	-0.165405	0	-1.23102	-0.165405
27	-4.36871	-0.201538	0	-4.36871	-0.201538		11	-1.79535	0.547485	0	-1.79535	0.547485
28	-4.86798	-0.691772	0	-4.86798	-0.691772		12	-3.32001	0.0117188	0	-3.32001	0.0117188
29	-5.06396	-0.634888	0	-5.06396	-0.634888		13	-3.7439	-1.2804	0	-3.7439	-1.2804
30	-4.95642	-1.3623	0	-4.95642	-1.3623		14	-4.3139	-4.74823	0	-4.3139	-4.74823
31	-4.68329	-1.21442	0	-4.68329	-1.21442		15	-4.60004	-3.88422	0	-4.60004	-3.88422
32	-5.43311	-1.54907	0	-5.43311	-1.54907		16	-4.87256	-3.76794	0	-4.87256	-3.76794
33	-5.22174	-1.09564	0	-5.22174	-1.09564		17	-5.50739	-2.97968	0	-5.50739	-2.97968
34	-5.43091	-0.953735	0	-5.43091	-0.953735		18	-5.80896	-2.75775	0	-5.80896	-2.75775
35	-5.36829	-0.855347	0	-5.36829	-0.855347		19	-6.36487	-2.56244	0	-6.36487	-2.56244
36	-5.67957	-1.2182	0	-5.67957	-1.2182		20	-6.10944	-2.12781	0	-6.10944	-2.12781
37	-6.29303	-1.68115	0	-6.29303	-1.68115		21	-6.9032	-1.60773	0	-6.9032	-1.60773
38	-6.18744	-1.31158	0	-6.18744	-1.31158		22	-6.35376	-1.3526	0	-6.35376	-1.3526
39	-5.9856	-1.4613	0	-5.9856	-1.4613		23	-6.09705	-1.63849	0	-6.09705	-1.63849
40	-6.66644	-2.00903	0	-6.66644	-2.00903		24	-5.87573	-1.19379	0	-5.87573	-1.19379
41	-6.43365	-1.72449	0	-6.43365	-1.72449		25	-5.97589	-0.0751343	0	-5.97589	-0.0751343
42	-6.86542	-1.78394	0	-6.86542	-1.78394		26	-5.39081	0.359924	0	-5.39081	0.359924
43	-6.92059	-1.45593	0	-6.92059	-1.45593		27	-5.83862	0.534729	0	-5.83862	0.534729
44	-7.42377	-0.904907	0	-7.42377	-0.904907		28	-6.21155	0.640869	0	-6.21155	0.640869
45	-7.37585	-1.99744	0	-7.37585	-1.99744		29	-5.78845	0.240723	0	-5.78845	0.240723
46	-7.96942	-1.47223	0	-7.96942	-1.47223		30	-5.76776	0.35321	0	-5.76776	0.35321
47	-8.10034	-1.63513	0	-8.10034	-1.63513		31	-6.66449	1.01324	0	-6.66449	1.01324
48	-8.62738	-1.28461	0	-8.62738	-1.28461		32	-6.60736	1.02814	0	-6.60736	1.02814
49	-9.07294	-1.58875	0	-9.07294	-1.58875		33	-7.51721	1.17493	0	-7.51721	1.17493
50	-8.9837	-0.671692	0	-8.9837	-0.671692		34	-6.94666	0.218689	0	-6.94666	0.218689
51	-9.10004	-0.629272	0	-9.10004	-0.629272		35	-9.75177	5.19574	0	-9.75177	5.19574
52	-9.09619	-1.70874	0	-9.09619	-1.70874		36	-7.65674	0.310608	0	-7.65674	0.310608
53	-9.42804	-1.32892	0	-9.42804	-1.32892		37	-9.99872	4.23566	0	-9.99872	4.23566
54	-9.99866	-2.44305	0	-9.99866	-2.44305		38	-10.6093	4.70679	0	-10.6093	4.70679
55	-10.2567	-2.19739	0	-10.2567	-2.19739		39	-11.0457	4.75702	0	-11.0457	4.75702
56	-9.8999	-3.96112	0	-9.8999	-3.96112		40	-12.1281	4.69812	0	-12.1281	4.69812
57	-10.0411	-4.57867	0	-10.0411	-4.57867		41	-12.6407	5.14648	0	-12.6407	5.14648
58	-10.8085	-5.26611	0	-10.8085	-5.26611		42	-13.1275	4.76031	0	-13.1275	4.76031
59	-10.3057	-5.01465	0	-10.3057	-5.01465		43	-14.1972	4.63611	0	-14.1972	4.63611
60	-9.71826	-5.33063	0	-9.71826	-5.33063		44	-14.243	4.88318	0	-14.243	4.88318
61	-9.5614	-6.4848	0	-9.5614	-6.4848		45	-14.0881	4.56451	0	-14.0881	4.56451
62	-8.64178	-7.13019	0	-8.64178	-7.13019		46	-14.911	4.60577	0	-14.911	4.60577
63	-8.26129	-8.44446	0	-8.26129	-8.44446		47	-15.7841	4.61316	0	-15.7841	4.61316
64	-8.75201	-9.19977	0	-8.75201	-9.19977		48	-16.1846	4.14838	0	-16.1846	4.14838
65	-8.3775	-9.48969	0	-8.3775	-9.48969		49	-16.8138	4.38721	0	-16.8138	4.38721
66	-9.07367	-10.2792	0	-9.07367	-10.2792		50	-17.6848	3.38159	0	-17.6848	3.38159
67	-9.87451	-10.7392	0	-9.87451	-10.7392		51	-17.9154	3.42883	0	-17.9154	3.42883
68	-9.30219	-11.5888	0	-9.30219	-11.5888		52	-18.1987	3.42609	0	-18.1987	3.42609
69	-9.2348	-12.4645	0	-9.2348	-12.4645		53	-18.7663	3.6106	0	-18.7663	3.6106
70	-9.2793	-13.4263	0	-9.2793	-13.4263		54	-19.0574	3.89124	0	-19.0574	3.89124
71	-9.86279	-14.4332	0	-9.86279	-14.4332		55	-20.009	3.6532	0	-20.009	3.6532
72	-9.77393	-15.6266	0	-9.77393	-15.6266		56	-20.8906	3.64203	0	-20.8906	3.64203
73	-10.6654	-17.7399	0	-10.6654	-17.7399		57	-21.4852	4.33136	0	-21.4852	4.33136
74	-11.1704	-18.7692	0	-11.1704	-18.7692		58	-21.6575	4.23578	0	-21.6575	4.23578
75	-11.235	-18.4337	0	-11.235	-18.4337		59	-22.5267	4.12366	0	-22.5267	4.12366
76	-12.023	-19.9176	0	-12.023	-19.9176		60	-23.6878	4.49481	0	-23.6878	4.49481
77	-12.313	-19.6843	0	-12.313	-19.6843		61	-24.8112	3.53632	0	-24.8112	3.53632
78	-12.9326	-21.0344	0	-12.9326	-21.0344		62	-25.7321	3.29333	0	-25.7321	3.29333
79	-14.1977	-23.249	0	-14.1977	-23.249		63	-27.3705	3.12842	0	-27.3705	3.12842
80	-14.3097	-24.1057	0	-14.3097	-24.1057		64	-28.5562	2.62054	0	-28.5562	2.62054
81	-15.8847	-25.2212	0	-15.8847	-25.2212		65	-29.9355	2.6604	0	-29.9355	2.6604
82	-17.4465	-26.1958	0	-17.4465	-26.1958		66	-30.2998	1.88495	0	-30.2998	1.88495
83	-19.1093	-26.6946	0	-19.1093	-26.6946		67	-27.0623	5.77515	0	-27.0623	5.77515
84	-20.4194	-29.4469	0	-20.4194	-29.4469		68	-30.5739	0.563599	0	-30.5739	0.563599
85	-22.2273	-31.2909	0	-22.2273	-31.2909		69	-31.4425	-0.385071	0	-31.4425	-0.385071
86	-23.5455	-32.9643	0	-23.5455	-32.9643		70	-31.7416	-0.577759	0	-31.7416	-0.577759
87	-23.8585	-34.895	0	-23.8585	-34.895		71	-32.3891	-0.110107	0	-32.3891	-0.110107
88	-24.2365	-36.9156	0	-24.2365	-36.9156		72	-33.3531	-1.10858	0	-33.3531	-1.10858
89	-25.4465	-39.2163	0	-25.4465	-39.2163		73	-32.7954	-1.40161	0	-32.7954	-1.40161
90	-26.3618	-42.4276	0	-26.3618	-42.4276		74	-32.777	-1.97266	0	-32.777	-1.97266
91	-28.3802	-43.3661	0	-28.3802	-43.3661		75	-33.2701	-2.41797	0	-33.2701	-2.41797
92	-29.9281	-44.9701	0	-29.9281	-44.9701		76	-34.7045	-1.49982	0	-34.7045	-1.49982
93	-31.2502	-45.2271	0	-31.2502	-45.2271		78	-34.491	1.8454	0	-34.491	1.8454
94	-31.796	-45.9606	0	-31.796	-45.9606		79	-34.7012	-4.89868	0	-34.7012	-4.89868
95	-31.6742	-46.9917	0	-31.6742	-46.9917		82	-37.3141	-2.53333	0	-37.3141	-2.53333
96	-33.2262	-47.0042	0	-33.2262	-47.0042		85	-38.1991	-3.19031	0	-38.1991	-3.19031
97	-32.3906	-47.2716	0	-32.3906	-47.2716		86	-38.6953	-3.32263	0	-38.6953	-3.32263
98	-32.7347	-47.5895	0	-32.7347	-47.5895		88	-38.8023	-3.9939	0	-38.8023	-3.9939
99	-32.8215	-47.6617	0	-32.8215	-47.6617		89	-38.676	-3.89215	0	-38.676	-3.89215
100	-33.2256	-48.9681	0	-33.2256	-48.9681		90	-38.8229	-3.72302	0	-38.8229	-3.72302
101	-34.3986	-49.123	0	-34.3986	-49.123		91	-39.5316	-3.875	0	-39.5316	-3.875
102	-33.3068	-50.0894	0	-33.3068	-50.0894		92	-40.1725	-3.81323	0	-40.1725	-3.81323
103	-34.219	-50.0701	0	-34.219	-50.0701		93	-40.2065	-4.01398	0	-40.2065	-4.01398
104	-32.7826	-51.3481	0	-32.7826	-51.3481		94	-40.2441	-4.01575	0	-40.2441	-4.01575
105	-33.7218	-50.8686	0	-33.7218	-50.8686		95	-40.9127	-3.54352	0	-40.9127	-3.54352
106	-34.4695	-50.4153	0	-34.4695	-50.4153		96	-41.2502	-3.12677	0	-41.2502	-3.12677
107	-34.6506	-50.4357	0	-34.6506	-50.4357		97	-41.7267	-3.29333	0	-41.7267	-3.29333
108	-33.5156	-49.4189	0	-33.5156	-49.4189		98	-42.0317	-3.76196	0	-42.0317	-3.76196
109	-33.0933	-49.5863	0	-33.0933	-49.5863		99	-41.787	-5.56958	0	-41.787	-5.56958
110	-32.5936	-49.7425	0	-32.5936	-49.7425		100	-42.5804	-5.125	0	-42.5804	-5.125
111	-33.5167	-50.2652	0	-33.5167	-50.2652		101	-42.4282	-6.45355	0	-42.4282	-6.45355
112	-33.6956	-50.1047	0	-33.6956	-50.1047		102	-42.3828	-6.8988	0	-42.3828	-6.8988
113	-34.0144	-50.6725	0	-34.0144	-50.6725		103	-42.0932	-8.16193	0	-42.0932	-8.16193
114	-33.4805	-50.2349	0	-33.4805	-50.2349		104	-42.4775	-7.52258	0	-42.4775	-7.52258
115	-33.3969	-51.3333	0	-33.3969	-51.3333		105	-41.9744	-9.01178	0	-41.9744	-9.01178
116	-33.1223	-50.7376	0	-33.1223	-50.7376		106	-42.3637	-8.9375	0	-42.3637	-8.9375
117	-33.1459	-52.3059	0	-33.1459	-52.3059		107	-43.3575	-11.0831	0	-43.3575	-11.0831
118	-32.5744	-51.7666	0	-32.5744	-51.7666		108	-44.2751	-13.1473	0	-44.2751	-13.1473
119	-31.7789	-51.8916	0	-31.7789	-51.8916		109	-43.3737	-14.2467	0	-43.3737	-14.2467
120	-31.7029	-51.9282	0	-31.7029	-51.9282		110	-43.2185	-14.7972	0	-43.2185	-14.7972
121	-30.4436	-52.014	0	-30.4436	-52.014		111	-43.4443	-14.0592	0	-43.4443	-14.0592
122	-30.5247	-51.7371	0	-30.5247	-51.7371		112	-41.5352	-15.3592	0	-41.5352	-15.3592
123	-30.7492	-51.9194	0	-30.7492	-51.9194		113	-40.0187	-16.0906	0	-40.0187	-16.0906
124	-30.1223	-51.3896	0	-30.1223	-51.3896		114	-40.6409	-15.6009	0	-40.6409	-15.6009
125	-28.7584	-51.4791	0	-28.7584	-51.4791		115	-40.0746	-16.9576	0	-40.0746	-16.9576
126	-27.757	-51.9713	0	-27.757	-51.9713		116	-38.4246	-18.4697	0	-38.4246	-18.4697
127	-28.0861	-52.9886	0	-28.0861	-52.9886		117	-37.9064	-18.7874	0	-37.9064	-18.7874
128	-26.0553	-52.941	0	-26.0553	-52.941		118	-35.365	-20.6304	0	-35.365	-20.6304
129	-25.8608	-53.8181	0	-25.8608	-53.8181		119	-34.7061	-20.9611	0	-34.7061	-20.9611
130	-23.7895	-53.4292	0	-23.7895	-53.4292		120	-32.6975	-23.2947	0	-32.6975	-23.2947
131	-22.8401	-53.8239	0	-22.8401	-53.8239		121	-31.9434	-25.8784	0	-31.9434	-25.8784
132	-24.1068	-52.6803	0	-24.1068	-52.6803		122	-34.0255	-24.4968	0	-34.0255	-24.4968
133	-22.4929	-52.4723	0	-22.4929	-52.4723		123	-34.1013	-23.9538	0	-34.1013	-23.9538
134	-21.4048	-51.327	0	-21.4048	-51.327		124	-35.3391	-21.7061	0	-35.3391	-21.7061
135	-19.786	-51.3528	0	-19.786	-51.3528		125	-33.8659	-24.5517	0	-33.8659	-24.5517
136	-16.3843	-53.6629	0	-16.3843	-53.6629		126	-32.8589	-25.0235	0	-32.8589	-25.0235
1	0	0	0	0	0		127	-32.6112	-23.6547	0	-32.6112	-23.6547
2	-0.369385	0.17157	0	-0.369385	0.17157		128	-32.2986	-22.304	0	-32.2986	-22.304
3	-0.150696	-0.154694	0	-0.150696	-0.154694		129	-29.6081	-27.0869	0	-29.6081	-27.0869
4	-0.135498	-0.0842285	0	-0.135498	-0.0842285		130	-29.2449	-24.9602	0	-29.2449	-24.9602
5	-0.329041	0.0706482	0	-0.329041	0.0706482		131	-30.285	-22.8941	0	-30.285	-22.8941
6	-0.401184	-0.239227	0	-0.401184	-0.239227		132	-29.927	-21.7402	0	-29.927	-21.7402
7	-10.6647	-0.228363	0	-10.6647	-0.228363		133	-30.453	-20.2759	0	-30.453	-20.2759
8	-0.344849	-0.25354	0	-0.344849	-0.25354		134	-31.8696	-18.0901	0	-31.8696	-18.0901
9	-0.124084	-0.558655	0	-0.124084	-0.558655		135	-32.2317	-15.9796	0	-32.2317	-15.9796
10	-0.686279	-0.22467	0	-0.686279	-0.22467		136	-31.6074	-15.0081	0	-31.6074	-15.0081
11	-1.33337	-0.0585327	0	-1.33337	-0.0585327		137	-32.8868	-13.066	0	-32.8868	-13.066
12	-1.75226	-0.945129	0	-1.75226	-0.945129		138	-33.643	-11.6664	0	-33.643	-11.6664
13	-1.58795	-0.577698	0	-1.58795	-0.577698		139	-34.5547	-10.6118	0	-34.5547	-10.6118
14	-1.61981	-0.615356	0	-1.61981	-0.615356		140	-36.2837	-9.64752	0	-36.2837	-9.64752
15	-1.74963	-0.584656	0	-1.74963	-0.584656		141	-36.9167	-8.66907	0	-36.9167	-8.66907
16	-1.87482	-0.812042	0	-1.87482	-0.812042		142	-37.9263	-8.82281	0	-37.9263	-8.82281
17	-1.7561	-1.11478	0	-1.7561	-1.11478		143	-37.6865	-9.51105	0	-37.6865	-9.51105
18	-1.51501	-1.02853	0	-1.51501	-1.02853		144	-45.7051	-9.34875	0	-45.7051	-9.34875
19	-1.69104	-0.860046	0	-1.69104	-0.860046		145	-38.6353	-7.65045	0	-38.6353	-7.65045
20	-13.5786	0.0270081	0	-13.5786	0.0270081		1	0	0	0	0	0
21	-2.07202	-0.890289	0	-2.07202	-0.890289		2	-0.105957	0.290894	0	-0.105957	0.290894
22	-2.56757	-1.13214	0	-2.56757	-1.13214		3	0.136658	-0.19397	0	0.136658	-0.19397
23	-2.30328	-1.43372	0	-2.30328	-1.43372		4	-0.0181885	0.170898	0	-0.0181885	0.170898
24	-2.5318	-1.29993	0	-2.5318	-1.29993		5	-0.166077	-0.0534058	0	-0.166077	-0.0534058
25	-12.8002	2.88828	0	-12.8002	2.88828		6	0.403442	0.0217896	0	0.403442	0.0217896
26	-2.81049	-0.0513916	0	-2.81049	-0.0513916		7	-0.421082	-0.865662	0	-0.421082	-0.865662
27	-1.87299	-0.0072937	0	-1.87299	-0.0072937		8	-0.65271	0.457214	0	-0.65271	0.457214
28	-1.27283	0.016449	0	-1.27283	0.016449		9	-1.10748	0.471741	0	-1.10748	0.471741
29	-1.64789	0.571716	0	-1.64789	0.571716		10	-0.737915	-0.0681152	0	-0.737915	-0.0681152
30	-2.23395	0.0615845	0	-2.23395	0.0615845		11	-1.6792	-0.00567627	0	-1.6792	-0.00567627
31	-2.44897	0.40329	0	-2.44897	0.40329		12	-3.91425	-0.547607	0	-3.91425	-0.547607
32	-1.94611	0.915039	0	-1.94611	0.915039		13	-3.46979	-0.945007	0	-3.46979	-0.945007
33	-1.86133	1.3313	0	-1.86133	1.3313		14	-2.92291	-1.47723	0	-2.92291	-1.47723
34	-2.24139	1.56818	0	-2.24139	1.56818		15	-2.79919	-1.52344	0	-2.79919	-1.52344
35	-2.7865	1.58203	0	-2.7865	1.58203		16	-2.94733	-1.72089	0	-2.94733	-1.72089
36	-2.56226	1.21042	0	-2.56226	1.21042		17	-2.99078	-2.25592	0	-2.99078	-2.25592
37	-2.65771	1.39633	0	-2.65771	1.39633		18	-2.75055	-2.22009	0	-2.75055	-2.22009
38	-2.75665	1.38751	0	-2.75665	1.38751		19	-2.55206	-2.37213	0	-2.55206	-2.37213
39	-2.76581	1.49713	0	-2.76581	1.49713		20	-2.67236	-2.79102	0	-2.67236	-2.79102
40	-2.69067	2.14462	0	-2.69067	2.14462		21	-2.79095	-2.75586	0	-2.79095	-2.75586
41	-2.77637	1.93994	0	-2.77637	1.93994		22	-2.80884	-2.50159	0	-2.80884	-2.50159
42	-2.88617	2.34366	0	-2.88617	2.34366		23	-2.55078	-2.39948	0	-2.55078	-2.39948
43	-2.79279	2.64828	0	-2.79279	2.64828		24	-2.9043	-2.33466	0	-2.9043	-2.33466
44	-3.17096	2.66992	0	-3.17096	2.66992		25	-2.94	-1.93378	0	-2.94	-1.93378
45	-3.26398	1.7829	0	-3.26398	1.7829		26	-3.39429	-0.21344	0	-3.39429	-0.21344
46	-3.79547	1.51691	0	-3.79547	1.51691		27	-4.17987	-1.69537	0	-4.17987	-1.69537
47	-3.16571	1.28561	0	-3.16571	1.28561		28	-4.89441	-1.81256	0	-4.89441	-1.81256
48	-3.14349	1.38373	0	-3.14349	1.38373		29	-5.68817	-1.56055	0	-5.68817	-1.56055
49	-3.15924	0.888641	0	-3.15924	0.888641		30	-6.22754	-1.74573	0	-6.22754	-1.74573
50	-3.10065	0.589294	0	-3.10065	0.589294		31	-6.68854	-0.950256	0	-6.68854	-0.950256
51	-2.99005	0.120728	0	-2.99005	0.120728		32	-6.8028	-0.42627	0	-6.8028	-0.42627
52	-3.11554	0.799438	0	-3.11554	0.799438		33	-7.30267	-0.649231	0	-7.30267	-0.649231
53	-2.32666	1.59448	0	-2.32666	1.59448		34	-7.7572	-0.355469	0	-7.7572	-0.355469
54	-2.34998	1.66409	0	-2.34998	1.66409		35	-8.61639	-0.390503	0	-8.61639	-0.390503
55	-2.54755	2.00983	0	-2.54755	2.00983		36	-9.26587	-0.628784	0	-9.26587	-0.628784
56	-2.66449	1.86185	0	-2.66449	1.86185		37	-9.80023	0.0369263	0	-9.80023	0.0369263
57	-2.591	1.75494	0	-2.591	1.75494		38	-10.9554	0.666382	0	-10.9554	0.666382
58	-2.53082	1.99551	0	-2.53082	1.99551		39	-10.3386	-2.99408	0	-10.3386	-2.99408
59	-2.56311	2.01331	0	-2.56311	2.01331		40	-10.192	-3.00018	0	-10.192	-3.00018
60	-2.74927	0.979736	0	-2.74927	0.979736		41	-10.832	-3.83032	0	-10.832	-3.83032
61	-2.8996	0.428833	0	-2.8996	0.428833		42	-11.8346	-0.457031	0	-11.8346	-0.457031
62	-1.97156	1.85596	0	-1.97156	1.85596		43	-12.0229	-0.147217	0	-12.0229	-0.147217
63	-2.19153	1.57422	0	-2.19153	1.57422		44	-12.0895	-5.01343	0	-12.0895	-5.01343
64	-1.65356	1.1778	0	-1.65356	1.1778		45	-12.5914	-5.75269	0	-12.5914	-5.75269
65	-1.90039	1.25055	0	-1.90039	1.25055		46	-12.7862	-5.4519	0	-12.7862	-5.4519
66	-1.49469	1.75079	0	-1.49469	1.75079		47	-12.686	-6.53278	0	-12.686	-6.53278
67	-1.87903	1.52719	0	-1.87903	1.52719		48	-13.4395	-0.767517	0	-13.4395	-0.767517
68	-1.55182	2.047	0	-1.55182	2.047		49	-13.413	-1.46307	0	-13.413	-1.46307
69	-1.63873	1.58426	0	-1.63873	1.58426		50	-13.2292	-7.52826	0	-13.2292	-7.52826
70	-1.35388	1.8309	0	-1.35388	1.8309		51	-12.9999	-1.35486	0	-12.9999	-1.35486
71	-2.01062	2.13037	0	-2.01062	2.13037		52	-13.2567	-7.76367	0	-13.2567	-7.76367
72	-1.80853	2.04611	0	-1.80853	2.04611		53	-13.354	-2.50232	0	-13.354	-2.50232
73	-1.56787	1.81772	0	-1.56787	1.81772		54	-13.541	-1.66992	0	-13.541	-1.66992
74	-2.06293	2.40121	0	-2.06293	2.40121		55	-13.5096	-2.42004	0	-13.5096	-2.42004
75	-1.62976	2.25632	0	-1.62976	2.25632		56	-13.3379	-8.1908	0	-13.3379	-8.1908
76	-1.72382	2.27646	0	-1.72382	2.27646		57	-13.4661	-8.24567	0	-13.4661	-8.24567
77	-1.66211	2.2294	0	-1.66211	2.2294		58	-12.7883	-7.77942	0	-12.7883	-7.77942
78	-1.495	2.27618	0	-1.495	2.27618		59	-12.8972	-8.09222	0	-12.8972	-8.09222
79	-1.30591	2.26346	0	-1.30591	2.26346		60	-13.357	-8.76935	0	-13.357	-8.76935
80	-1.37323	1.98923	0	-1.37323	1.98923		61	-12.6077	-7.84967	0	-12.6077	-7.84967
81	-1.10876	1.99356	0	-1.10876	1.99356		62	-12.8588	-7.70459	0	-12.8588	-7.70459
82	-1.33514	1.62451	0	-1.33514	1.62451		63	-13.1155	-8.62915	0	-13.1155	-8.62915
83	-0.954651	1.56506	0	-0.954651	1.56506		64	-13.5817	-9.13708	0	-13.5817	-9.13708
84	-1.04675	1.51245	0	-1.04675	1.51245		65	-13.3442	-9.02521	0	-13.3442	-9.02521
85	-1.24756	1.39166	0	-1.24756	1.39166		66	-12.9942	-8.84149	0	-12.9942	-8.84149
86	-0.556702	1.75125	0	-0.556702	1.75125		67	-12.7021	-8.87817	0	-12.7021	-8.87817
87	-0.937927	1.91199	0	-0.937927	1.91199		68	-12.809	-8.14484	0	-12.809	-8.14484
88	-0.377502	1.92056	0	-0.377502	1.92056		69	-13.1774	-8.76764	0	-13.1774	-8.76764
89	-0.34491	1.72971	0	-0.34491	1.72971		70	-13.0131	-8.7533	0	-13.0131	-8.7533
90	-0.22052	1.98965	0	-0.22052	1.98965		71	-12.9739	-9.5191	0	-12.9739	-9.5191
91	-0.542297	2.27765	0	-0.542297	2.27765		72	-13.3992	-9.73297	0	-13.3992	-9.73297
92	-0.337952	2.27826	0	-0.337952	2.27826		73	-13.3983	-9.88013	0	-13.3983	-9.88013
93	-0.171326	2.34076	0	-0.171326	2.34076		74	-13.8717	-10.39	0	-13.8717	-10.39
94	-0.276001	2.18082	0	-0.276001	2.18082		75	-13.6631	-10.7	0	-13.6631	-10.7
95	-0.234375	2.17355	0	-0.234375	2.17355		76	-13.1328	-10.7024	0	-13.1328	-10.7024
96	-0.504822	1.91019	0	-0.504822	1.91019		77	-13.2333	-10.1113	0	-13.2333	-10.1113
97	-0.136353	2.22272	0	-0.136353	2.22272		78	-12.2477	-11.6176	0	-12.2477	-11.6176
98	-0.384094	2.11618	0	-0.384094	2.11618		79	-12.1257	-10.5851	0	-12.1257	-10.5851
99	-0.206909	2.35278	0	-0.206909	2.35278		80	-12.3103	-10.5308	0	-12.3103	-10.5308
100	0.187683	2.00336	0	0.187683	2.00336		81	-11.9819	-9.33521	0	-11.9819	-9.33521
101	0.290039	1.92294	0	0.290039	1.92294		82	-11.2549	-10.7326	0	-11.2549	-10.7326
102	0.208069	2.45447	0	0.208069	2.45447		83	-11.5339	-10.1616	0	-11.5339	-10.1616
103	0.737671	1.8208	0	0.737671	1.8208		84	-7.25677	-14.025	0	-7.25677	-14.025
104	0.304443	2.46378	0	0.304443	2.46378		85	-10.37	-11.7978	0	-10.37	-11.7978
105	0.40094	2.05322	0	0.40094	2.05322		86	-11.4058	-11.5081	0	-11.4058	-11.5081
106	0.406982	2.49326	0	0.406982	2.49326		87	-11.1077	-10.9484	0	-11.1077	-10.9484
107	0.892456	2.33047	0	0.892456	2.33047		88	-11.4407	-10.6208	0	-11.4407	-10.6208
108	0.633972	1.65775	0	0.633972	1.65775		89	-10.7773	-9.62201	0	-10.7773	-9.62201
109	0.990295	1.78094	0	0.990295	1.78094		90	-5.15826	-14.0655	0	-5.15826	-14.0655
110	0.68042	2.34109	0	0.68042	2.34109		91	-4.61517	-14.284	0	-4.61517	-14.284
111	0.935547	2.33047	0	0.935547	2.33047		92	-3.36786	-14.8639	0	-3.36786	-14.8639
112	0.890503	1.93198	0	0.890503	1.93198		93	-9.70087	-10.5518	0	-9.70087	-10.5518
113	0.513916	2.3569	0	0.513916	2.3569		94	-2.48987	-15.8463	0	-2.48987	-15.8463
114	0.79187	2.71127	0	0.79187	2.71127		95	-9.96826	-11.8951	0	-9.96826	-11.8951
115	0.638672	2.49973	0	0.638672	2.49973		96	-2.53809	-16.1145	0	-2.53809	-16.1145
116	0.50769	2.84421	0	0.50769	2.84421		97	-1.52576	-15.9612	0	-1.52576	-15.9612
117	0.645813	2.39188	0	0.645813	2.39188		98	-0.931274	-16.6948	0	-0.931274	-16.6948
118	1.04333	2.29456	0	1.04333	2.29456		99	-9.10608	-11.2691	0	-9.10608	-11.2691
119	0.84314	2.21533	0	0.84314	2.21533		100	-8.69098	-11.8868	0	-8.69098	-11.8868
120	0.881165	2.4213	0	0.881165	2.4213		101	-8.96979	-11.9657	0	-8.96979	-11.9657
121	0.759399	2.12329	0	0.759399	2.12329		102	-5.08453	-17.7838	0	-5.08453	-17.7838
122	0.550537	1.91556	0	0.550537	1.91556		103	-8.24982	-12.8759	0	-8.24982	-12.8759
123	0.421448	2.19312	0	0.421448	2.19312		104	-5.22766	-17.3829	0	-5.22766	-17.3829
124	0.825134	2.41898	0	0.825134	2.41898		105	-5.0705	-17.7974	0	-5.0705	-17.7974
125	1.20837	2.36584	0	1.20837	2.36584		106	-5.17456	-18.173	0	-5.17456	-18.173
126	0.960938	1.96222	0	0.960938	1.96222		107	-5.63385	-18.7377	0	-5.63385	-18.7377
127	1.24487	1.86331	0	1.24487	1.86331		108	-6.07404	-16.8983	0	-6.07404	-16.8983
128	1.29266	2.0863	0	1.29266	2.0863		109	-6.61792	-17.2144	0	-6.61792	-17.2144
129	1.4549	1.97266	0	1.4549	1.97266		110	-6.76025	-18.0052	0	-6.76025	-18.0052
130	1.19501	1.84695	0	1.19501	1.84695		111	-6.24762	-18.135	0	-6.24762	-18.135
131	1.07245	1.99472	0	1.07245	1.99472		112	-6.70831	-19.1542	0	-6.70831	-19.1542
132	0.681763	1.70096	0	0.681763	1.70096		113	-9.58191	-15.2822	0	-9.58191	-15.2822
133	1.00562	1.71658	0	1.00562	1.71658		114	-7.50543	-19.4091	0	-7.50543	-19.4091
134	0.513916	1.37595	0	0.513916	1.37595		115	-9.87439	-15.765	0	-9.87439	-15.765
135	0.63269	1.70947	0	0.63269	1.70947		116	-9.98041	-16.1415	0	-9.98041	-16.1415
136	0.52948	1.81876	0	0.52948	1.81876		117	-10.2326	-17.0339	0	-10.2326	-17.0339
1	0	0	0	0	0		118	-14.2682	-15.7331	0	-14.2682	-15.7331
2	0.00518799	-0.185242	0	0.00518799	-0.185242		119	-11.7689	-17.8581	0	-11.7689	-17.8581
3	2.20493	-3.22711	0	2.20493	-3.22711		120	-14.1686	-16.4094	0	-14.1686	-16.4094
4	1.92627	-3.00983	0	1.92627	-3.00983		121	-11.2551	-19.4416	0	-11.2551	-19.4416
5	0.753204	-2.29211	0	0.753204	-2.29211		122	-11.9369	-20.1036	0	-11.9369	-20.1036
6	4.6785	-3.46997	0	4.6785	-3.46997		123	-10.8259	-21.3619	0	-10.8259	-21.3619
7	4.77353	-3.19232	0	4.77353	-3.19232		124	-10.2733	-22.016	0	-10.2733	-22.016
8	4.08618	-3.58447	0	4.08618	-3.58447		125	-11.0446	-21.3353	0	-11.0446	-21.3353
9	4.18658	-4.23145	0	4.18658	-4.23145		126	-10.4509	-20.5061	0	-10.4509	-20.5061
10	4.10556	-4.51941	0	4.10556	-4.51941		127	-10.6512	-20.3521	0	-10.6512	-20.3521
11	0.557068	-2.27216	0	0.557068	-2.27216		128	-10.5749	-20.9635	0	-10.5749	-20.9635
12	3.01349	-4.73492	0	3.01349	-4.73492		129	-11.0702	-21.3952	0	-11.0702	-21.3952
13	3.27151	-4.01489	0	3.27151	-4.01489		130	-11.2496	-22.6709	0	-11.2496	-22.6709
14	4.2569	-4.71692	0	4.2569	-4.71692		131	-11.3673	-22.1907	0	-11.3673	-22.1907
15	2.93188	-3.67523	0	2.93188	-3.67523		132	-11.4946	-21.8365	0	-11.4946	-21.8365
16	5.30814	-4.72394	0	5.30814	-4.72394		133	-11.6368	-22.4154	0	-11.6368	-22.4154
17	2.37411	-3.09357	0	2.37411	-3.09357		134	-12.348	-21.6251	0	-12.348	-21.6251
18	4.78033	-4.60724	0	4.78033	-4.60724		135	-11.1155	-23.1796	0	-11.1155	-23.1796
19	4.37766	-4.34888	0	4.37766	-4.34888		136	-11.0925	-24.7869	0	-11.0925	-24.7869
20	4.98456	-3.76111	0	4.98456	-3.76111		137	-12.2034	-23.2307	0	-12.2034	-23.2307
21	5.41031	-2.82623	0	5.41031	-2.82623		138	-11.8846	-24.5026	0	-11.8846	-24.5026
22	6.62741	-2.14612	0	6.62741	-2.14612		139	-12.3042	-27.2717	0	-12.3042	-27.2717
23	7.14243	-1.31116	0	7.14243	-1.31116		140	-18.6956	-29.8769	0	-18.6956	-29.8769
24	7.84711	-0.937988	0	7.84711	-0.937988		141	-13.0405	-27.1215	0	-13.0405	-27.1215
25	8.00906	-0.175232	0	8.00906	-0.175232		142	-12.5819	-25.3697	0	-12.5819	-25.3697
26	8.2486	0.0970459	0	8.2486	0.0970459		143	-12.7711	-24.0605	0	-12.7711	-24.0605
27	8.35083	0.114014	0	8.35083	0.114014		144	-12.1694	-21.9167	0	-12.1694	-21.9167
28	9.37503	0.868469	0	9.37503	0.868469		145	-11.7778	-20.4767	0	-11.7778	-20.4767
29	9.26666	1.40466	0	9.26666	1.40466		1	0	0	0	0	0
30	9.82327	1.73431	0	9.82327	1.73431		2	9.96686	-0.000915527	0	9.96686	-0.000915527
31	10.8962	1.94379	0	10.8962	1.94379		3	9.36444	0.502594	0	9.36444	0.502594
32	11.1768	2.38507	0	11.1768	2.38507		8	11.4849	2.01083	0	11.4849	2.01083
33	10.1124	2.11884	0	10.1124	2.11884		9	-0.375	0.663208	0	-0.375	0.663208
34	11.6204	2.60706	0	11.6204	2.60706		10	-0.0203247	0.824707	0	-0.0203247	0.824707
35	12.5016	2.85193	0	12.5016	2.85193		11	10.2484	0.774872	0	10.2484	0.774872
36	13.2441	2.84052	0	13.2441	2.84052		12	8.14087	2.47275	0	8.14087	2.47275
37	14.2747	3.68317	0	14.2747	3.68317		13	-1.55981	1.17184	0	-1.55981	1.17184
38	14.6787	4.04572	0	14.6787	4.04572		14	8.97418	3.32776	0	8.97418	3.32776
39	14.8345	3.89087	0	14.8345	3.89087		15	9.09863	2.24542	0	9.09863	2.24542
40	14.9285	3.23584	0	14.9285	3.23584		16	-1.45703	0.57254	0	-1.45703	0.57254
41	15.3989	3.41614	0	15.3989	3.41614		17	8.29724	-0.731262	0	8.29724	-0.731262
42	16.1757	3.64465	0	16.1757	3.64465		18	8.62897	-0.71994	0	8.62897	-0.71994
43	16.2051	4.03473	0	16.2051	4.03473		19	8.48383	-0.930328	0	8.48383	-0.930328
44	15.9517	3.64789	0	15.9517	3.64789		20	8.2998	-0.101532	0	8.2998	-0.101532
45	16.245	3.53107	0	16.245	3.53107		21	8.35468	-0.0498352	0	8.35468	-0.0498352
46	16.6745	3.9574	0	16.6745	3.9574		22	8.7345	-0.297607	0	8.7345	-0.297607
47	16.4265	4.12317	0	16.4265	4.12317		23	8.82758	-0.117737	0	8.82758	-0.117737
48	16.8723	6.50537	0	16.8723	6.50537		24	8.67426	-0.126068	0	8.67426	-0.126068
49	16.3802	4.95599	0	16.3802	4.95599		25	8.34015	-0.282013	0	8.34015	-0.282013
50	17.1357	5.33728	0	17.1357	5.33728		26	8.79828	-0.530701	0	8.79828	-0.530701
51	18.3583	5.28534	0	18.3583	5.28534		27	8.83441	-0.644775	0	8.83441	-0.644775
52	18.2521	6.10864	0	18.2521	6.10864		28	8.72437	-0.811127	0	8.72437	-0.811127
53	18.8353	6.17047	0	18.8353	6.17047		29	8.53882	-0.0943909	0	8.53882	-0.0943909
54	18.964	7.01868	0	18.964	7.01868		30	8.60468	-0.138306	0	8.60468	-0.138306
55	19.4589	10.828	0	19.4589	10.828		31	8.2724	-0.307373	0	8.2724	-0.307373
56	20.1981	10.8138	0	20.1981	10.8138		32	8.40863	-0.0549011	0	8.40863	-0.0549011
57	19.3176	7.60547	0	19.3176	7.60547		33	8.10187	0.13858	0	8.10187	0.13858
58	19.6745	7.4104	0	19.6745	7.4104		34	8.52783	-0.338806	0	8.52783	-0.338806
59	20.0022	7.93182	0	20.0022	7.93182		35	8.71082	-0.488129	0	8.71082	-0.488129
60	19.5647	7.36829	0	19.5647	7.36829		36	8.83179	-1.47668	0	8.83179	-1.47668
61	18.2306	6.11517	0	18.2306	6.11517		37	8.66321	-1.09674	0	8.66321	-1.09674
62	18.2944	6.01746	0	18.2944	6.01746		38	7.93665	-1.53342	0	7.93665	-1.53342
63	17.025	6.75238	0	17.025	6.75238		39	8.21381	-1.2934	0	8.21381	-1.2934
64	16.1923	8.40253	0	16.1923	8.40253		40	7.45221	-1.71652	0	7.45221	-1.71652
65	16.2488	10.6602	0	16.2488	10.6602		41	7.88257	-1.93127	0	7.88257	-1.93127
66	15.4241	11.2122	0	15.4241	11.2122		42	7.7677	-3.41602	0	7.7677	-3.41602
68	9.33456	12.0067	0	9.33456	12.0067		43	7.51575	-2.89014	0	7.51575	-2.89014
69	5.41547	15.2273	0	5.41547	15.2273		44	7.35236	-4.30087	0	7.35236	-4.30087
70	4.85541	10.3942	0	4.85541	10.3942		45	7.60181	-4.03622	0	7.60181	-4.03622
71	2.49249	9.01581	0	2.49249	9.01581		46	7.30945	-4.44046	0	7.30945	-4.44046
72	1.94559	10.8022	0	1.94559	10.8022		47	7.55145	-5.5466	0	7.55145	-5.5466
73	-1.27521	7.90143	0	-1.27521	7.90143		48	6.99219	-6.98666	0	6.99219	-6.98666
74	0.055481	7.68097	0	0.055481	7.68097		49	7.15021	-8.28052	0	7.15021	-8.28052
75	6.28952	1.64185	0	6.28952	1.64185		50	6.54651	-8.91577	0	6.54651	-8.91577
76	7.26993	-0.645264	0	7.26993	-0.645264		51	6.55109	-9.9064	0	6.55109	-9.9064
77	10.047	-1.72235	0	10.047	-1.72235		52	6.06946	-10.6263	0	6.06946	-10.6263
78	13.7048	-4.72778	0	13.7048	-4.72778		53	5.89038	-11.6366	0	5.89038	-11.6366
79	14.0485	0.0737915	0	14.0485	0.0737915		54	5.97125	-12.3848	0	5.97125	-12.3848
80	14.0085	3.23883	0	14.0085	3.23883		55	5.41821	-13.8221	0	5.41821	-13.8221
81	15.5826	5.11957	0	15.5826	5.11957		56	5.36707	-14.3121	0	5.36707	-14.3121
82	14.6901	5.63666	0	14.6901	5.63666		57	5.26788	-15.7113	0	5.26788	-15.7113
83	13.8967	1.15063	0	13.8967	1.15063		58	4.81293	-16.5225	0	4.81293	-16.5225
84	18.2493	-2.28717	0	18.2493	-2.28717		59	4.06396	-17.9833	0	4.06396	-17.9833
85	20.5769	-1.79706	0	20.5769	-1.79706		60	3.76562	-18.9029	0	3.76562	-18.9029
86	20.4831	1.36224	0	20.4831	1.36224		61	2.94769	-20.3639	0	2.94769	-20.3639
87	20.6256	0.846497	0	20.6256	0.846497		62	2.33246	-22.4667	0	2.33246	-22.4667
88	24.4344	0.161377	0	24.4344	0.161377		63	1.54266	-23.2159	0	1.54266	-23.2159
89	26.5822	1.49188	0	26.5822	1.49188		64	1.16699	-23.8686	0	1.16699	-23.8686
90	25.278	1.18384	0	25.278	1.18384		65	1.04822	-24.389	0	1.04822	-24.389
91	28.7292	5.23883	0	28.7292	5.23883		66	0.315735	-25.3006	0	0.315735	-25.3006
92	27.0704	6.13831	0	27.0704	6.13831		67	-0.295715	-25.6703	0	-0.295715	-25.6703
93	18.5316	0.191895	0	18.5316	0.191895		68	-0.258728	-26.4565	0	-0.258728	-26.4565
94	17.0178	-1.5014	0	17.0178	-1.5014		69	-1.47498	-27.0346	0	-1.47498	-27.0346
95	14.3761	-2.56183	0	14.3761	-2.56183		70	-1.13934	-27.8784	0	-1.13934	-27.8784
96	8.85883	-3.21576	0	8.85883	-3.21576		71	0.635986	-28.7043	0	0.635986	-28.7043
97	6.05786	-4.36707	0	6.05786	-4.36707		72	-0.742981	-29.1274	0	-0.742981	-29.1274
98	5.88776	-3.22809	0	5.88776	-3.22809		73	0.0476685	-29.4697	0	0.0476685	-29.4697
99	1.86411	-1.24969	0	1.86411	-1.24969		74	-0.0443726	-31.2169	0	-0.0443726	-31.2169
100	0.575928	0.606567	0	0.575928	0.606567		75	-0.846558	-31.902	0	-0.846558	-31.902
101	-0.978912	1.58276	0	-0.978912	1.58276		76	0.252075	-33.3225	0	0.252075	-33.3225
102	2.54684	-0.625305	0	2.54684	-0.625305		77	-0.768616	-33.2137	0	-0.768616	-33.2137
103	6.68878	-3.78107	0	6.68878	-3.78107		78	-0.509338	-34.4079	0	-0.509338	-34.4079
104	6.85669	-4.92609	0	6.85669	-4.92609		79	-0.189697	-35.1869	0	-0.189697	-35.1869
105	6.85196	-5.20526	0	6.85196	-5.20526		80	0.296204	-36.0154	0	0.296204	-36.0154
106	1.19232	-2.62012	0	1.19232	-2.62012		81	0.951599	-36.492	0	0.951599	-36.492
107	-1.01968	-5.45721	0	-1.01968	-5.45721		82	0.0269775	-36.6675	0	0.0269775	-36.6675
108	-3.43558	-7.75769	0	-3.43558	-7.75769		83	-0.682007	-37.2281	0	-0.682007	-37.2281
109	-2.72543	-10.4785	0	-2.72543	-10.4785		84	-0.277161	-37.3965	0	-0.277161	-37.3965
1	0	0	0	0	0		85	0.0644531	-38.511	0	0.0644531	-38.511
2	0.0814819	0.496765	0	0.0814819	0.496765		86	1.05292	-39.0548	0	1.05292	-39.0548
3	0.114136	0.295898	0	0.114136	0.295898		87	1.04755	-39.2499	0	1.04755	-39.2499
4	0.439026	0.336395	0	0.439026	0.336395		88	1.74103	-40.2162	0	1.74103	-40.2162
5	-0.0908813	0.106659	0	-0.0908813	0.106659		89	3.38916	-40.9914	0	3.38916	-40.9914
6	0.410522	-0.207642	0	0.410522	-0.207642		90	2.62775	-40.8655	0	2.62775	-40.8655
7	-0.16687	0.16333	0	-0.16687	0.16333		91	3.0484	-41.6983	0	3.0484	-41.6983
8	0.0787964	-0.147522	0	0.0787964	-0.147522		92	5.33374	-43.583	0	5.33374	-43.583
9	0.0441895	-0.740265	0	0.0441895	-0.740265		93	5.35052	-43.3948	0	5.35052	-43.3948
10	-0.304932	-1.15585	0	-0.304932	-1.15585		94	6.31659	-43.762	0	6.31659	-43.762
11	-1.01837	-1.12244	0	-1.01837	-1.12244		95	6.54913	-44.0803	0	6.54913	-44.0803
12	-2.87085	-1.60202	0	-2.87085	-1.60202		96	7.24164	-44.3581	0	7.24164	-44.3581
13	-2.9895	-1.95874	0	-2.9895	-1.95874		97	7.79858	-44.1925	0	7.79858	-44.1925
14	-3.12122	-1.39087	0	-3.12122	-1.39087		98	9.05292	-44.9736	0	9.05292	-44.9736
15	-2.91675	-1.2804	0	-2.91675	-1.2804		99	9.5127	-45.1302	0	9.5127	-45.1302
16	-2.84668	-2.12311	0	-2.84668	-2.12311		100	10.7336	-44.6936	0	10.7336	-44.6936
17	-2.50354	-2.54251	0	-2.50354	-2.54251		101	11.3859	-44.5337	0	11.3859	-44.5337
18	-3.21326	-3.55856	0	-3.21326	-3.55856		102	11.8976	-44.1752	0	11.8976	-44.1752
19	-2.83435	-3.50201	0	-2.83435	-3.50201		103	11.9768	-43.8104	0	11.9768	-43.8104
20	-2.51562	-3.24338	0	-2.51562	-3.24338		104	12.4711	-43.4856	0	12.4711	-43.4856
21	-2.49597	-3.62399	0	-2.49597	-3.62399		105	13.2664	-43.1531	0	13.2664	-43.1531
22	-2.8476	-4.43192	0	-2.8476	-4.43192		106	14.3327	-43.0388	0	14.3327	-43.0388
23	-3.84125	-4.72964	0	-3.84125	-4.72964		107	15.117	-42.2863	0	15.117	-42.2863
24	-3.93182	-5.46732	0	-3.93182	-5.46732		108	15.1658	-41.8352	0	15.1658	-41.8352
25	-3.91858	-5.62018	0	-3.91858	-5.62018		109	15.1577	-41.9554	0	15.1577	-41.9554
26	-3.3042	-6.43152	0	-3.3042	-6.43152		110	14.833	-37.7398	0	14.833	-37.7398
27	-3.30328	-6.04608	0	-3.30328	-6.04608		119	17.4601	-34.5177	0	17.4601	-34.5177
28	-2.98914	-6.18805	0	-2.98914	-6.18805		124	18.7079	-35.5405	0	18.7079	-35.5405
29	-2.57281	-6.57877	0	-2.57281	-6.57877		125	16.4445	-35.2939	0	16.4445	-35.2939
30	-3.01465	-7.25809	0	-3.01465	-7.25809		126	15.3695	-34.9973	0	15.3695	-34.9973
31	-3.10693	-7.44537	0	-3.10693	-7.44537		127	16.2937	-34.1339	0	16.2937	-34.1339
32	-2.89258	-7.83826	0	-2.89258	-7.83826		129	16.9966	-34.5829	0	16.9966	-34.5829
33	-3.23682	-8.05771	0	-3.23682	-8.05771		130	13.8666	-31.8777	0	13.8666	-31.8777
34	-2.51062	-7.8241	0	-2.51062	-7.8241		131	17.5759	-35.3635	0	17.5759	-35.3635
35	-2.4856	-7.96988	0	-2.4856	-7.96988		132	17.1397	-34.1128	0	17.1397	-34.1128
36	-2.60583	-8.02652	0	-2.60583	-8.02652		133	17.3204	-33.8969	0	17.3204	-33.8969
37	-3.20544	-7.90112	0	-3.20544	-7.90112		134	17.499	-34.3589	0	17.499	-34.3589
38	-3.05096	-8.04858	0	-3.05096	-8.04858		135	13.509	-31.6815	0	13.509	-31.6815
39	-2.73468	-7.55664	0	-2.73468	-7.55664		136	18.0838	-33.7863	0	18.0838	-33.7863
40	-2.45673	-8.23898	0	-2.45673	-8.23898		139	18.3633	-33.1975	0	18.3633	-33.1975
41	-2.78223	-8.36676	0	-2.78223	-8.36676		140	12.667	-29.9312	0	12.667	-29.9312
42	-2.99158	-8.47516	0	-2.99158	-8.47516		144	1.27679	-22.9337	0	1.27679	-22.9337
43	-3.302	-8.32907	0	-3.302	-8.32907		145	0.835571	-23.6723	0	0.835571	-23.6723
44	-2.56372	-8.69067	0	-2.56372	-8.69067		1	0	0	0	0	0
45	-2.12683	-8.72079	0	-2.12683	-8.72079		2	-2.15594	3.02673	0	-2.15594	3.02673
46	-1.46393	-8.45004	0	-1.46393	-8.45004		3	-1.96255	3.44061	0	-1.96255	3.44061
47	-1.56152	-8.84866	0	-1.56152	-8.84866		4	-2.58176	3.55035	0	-2.58176	3.55035
48	-1.09534	-8.69122	0	-1.09534	-8.69122		5	-1.83472	2.88422	0	-1.83472	2.88422
49	-0.880737	-8.44492	0	-0.880737	-8.44492		6	-2.84903	4.16394	0	-2.84903	4.16394
50	-0.52301	-8.31134	0	-0.52301	-8.31134		7	-2.69894	3.47577	0	-2.69894	3.47577
51	-0.530334	-8.4733	0	-0.530334	-8.4733		8	-2.67862	3.34125	0	-2.67862	3.34125
52	-0.21344	-9.40631	0	-0.21344	-9.40631		9	-4.09314	4.39673	0	-4.09314	4.39673
53	0.281433	-10.1111	0	0.281433	-10.1111		10	-3.86139	3.96155	0	-3.86139	3.96155
54	-0.0886841	-10.1405	0	-0.0886841	-10.1405		11	-3.89313	4.31335	0	-3.89313	4.31335
55	0.22876	-10.0956	0	0.22876	-10.0956		12	-5.05988	4.2301	0	-5.05988	4.2301
56	0.518372	-10.2333	0	0.518372	-10.2333		13	-5.08987	4.16064	0	-5.08987	4.16064
57	1.47473	-9.91913	0	1.47473	-9.91913		14	-5.02664	4.43036	0	-5.02664	4.43036
58	1.23279	-9.59042	0	1.23279	-9.59042		15	-5.07922	4.48889	0	-5.07922	4.48889
59	1.6474	-9.25522	0	1.6474	-9.25522		16	-4.68378	4.29535	0	-4.68378	4.29535
60	0.833008	-9.05463	0	0.833008	-9.05463		17	-4.27295	4.18719	0	-4.27295	4.18719
61	1.3269	-8.80963	0	1.3269	-8.80963		18	-4.29199	4.23224	0	-4.29199	4.23224
62	1.33276	-8.26303	0	1.33276	-8.26303		19	-4.2402	4.39282	0	-4.2402	4.39282
63	2.46399	-9.10614	0	2.46399	-9.10614		20	-3.80789	4.28369	0	-3.80789	4.28369
64	2.80811	-8.42432	0	2.80811	-8.42432		21	-3.22684	4.43225	0	-3.22684	4.43225
65	1.81488	-8.60672	0	1.81488	-8.60672		22	-3.26352	4.06458	0	-3.26352	4.06458
66	1.48456	-8.30777	0	1.48456	-8.30777		23	-3.07904	3.40808	0	-3.07904	3.40808
67	1.95294	-7.61755	0	1.95294	-7.61755		24	-2.34515	3.72809	0	-2.34515	3.72809
68	3.10211	-7.10657	0	3.10211	-7.10657		25	-1.44879	4.36511	0	-1.44879	4.36511
69	3.18298	-6.93134	0	3.18298	-6.93134		26	-1.31735	4.04095	0	-1.31735	4.04095
70	4.51532	-5.82648	0	4.51532	-5.82648		27	-1.24139	4.46356	0	-1.24139	4.46356
71	4.56915	-5.30417	0	4.56915	-5.30417		28	-0.940857	3.50549	0	-0.940857	3.50549
72	5.0824	-4.94672	0	5.0824	-4.94672		29	-0.720154	3.08575	0	-0.720154	3.08575
73	5.04999	-4.65674	0	5.04999	-4.65674		30	-0.721375	1.52533	0	-0.721375	1.52533
74	4.65149	-4.65143	0	4.65149	-4.65143		31	0.193237	2.70624	0	0.193237	2.70624
75	4.54236	-4.4035	0	4.54236	-4.4035		32	0.964294	1.24841	0	0.964294	1.24841
76	4.7937	-4.07727	0	4.7937	-4.07727		33	1.38232	2.32208	0	1.38232	2.32208
77	5.92352	-3.63455	0	5.92352	-3.63455		34	2.72366	2.21582	0	2.72366	2.21582
78	5.95319	-3.40421	0	5.95319	-3.40421		35	2.44778	2.23401	0	2.44778	2.23401
79	5.55438	-3.57007	0	5.55438	-3.57007		36	3.57452	2.72919	0	3.57452	2.72919
80	1.8692	-4.00137	0	1.8692	-4.00137		37	4.76257	3.04694	0	4.76257	3.04694
81	-1.25677	-5.37799	0	-1.25677	-5.37799		38	3.94992	3.02765	0	3.94992	3.02765
82	-2.66327	-5.69852	0	-2.66327	-5.69852		39	4.3927	3.31512	0	4.3927	3.31512
83	-2.49512	-6.27927	0	-2.49512	-6.27927		40	4.43365	4.12787	0	4.43365	4.12787
84	-0.76416	-6.71201	0	-0.76416	-6.71201		41	4.92822	4.41626	0	4.92822	4.41626
85	1.05884	-7.31964	0	1.05884	-7.31964		42	5.15045	5.13184	0	5.15045	5.13184
86	1.8053	-8.04971	0	1.8053	-8.04971		43	5.02155	5.41705	0	5.02155	5.41705
87	3.28839	-6.58005	0	3.28839	-6.58005		44	4.69205	4.14423	0	4.69205	4.14423
88	4.97186	-5.10074	0	4.97186	-5.10074		45	5.40457	5.22736	0	5.40457	5.22736
89	5.6344	-4.20068	0	5.6344	-4.20068		46	5.83475	5.05627	0	5.83475	5.05627
90	6.16553	-4.11163	0	6.16553	-4.11163		47	6.26752	5.61176	0	6.26752	5.61176
91	6.31403	-3.46649	0	6.31403	-3.46649		48	5.82718	4.00531	0	5.82718	4.00531
92	6.95782	-1.04398	0	6.95782	-1.04398		49	7.24976	6.96002	0	7.24976	6.96002
93	6.66388	0.35495	0	6.66388	0.35495		50	7.22095	6.52142	0	7.22095	6.52142
94	7.22028	1.79541	0	7.22028	1.79541		51	6.67905	6.78571	0	6.67905	6.78571
95	6.01776	2.15964	0	6.01776	2.15964		52	6.01126	6.79846	0	6.01126	6.79846
96	3.98511	2.10687	0	3.98511	2.10687		53	5.88773	6.74438	0	5.88773	6.74438
97	4.76184	2.62839	0	4.76184	2.62839		54	6.26602	6.50507	0	6.26602	6.50507
98	5.96588	1.65375	0	5.96588	1.65375		55	5.4917	8.01587	0	5.4917	8.01587
99	6.51868	1.94272	0	6.51868	1.94272		56	5.22952	9.07214	0	5.22952	9.07214
100	5.63794	4.47375	0	5.63794	4.47375		57	4.40872	9.29474	0	4.40872	9.29474
101	6.01672	4.70419	0	6.01672	4.70419		58	4.55341	9.14459	0	4.55341	9.14459
102	6.80487	4.66565	0	6.80487	4.66565		59	3.74405	9.70874	0	3.74405	9.70874
103	7.5683	4.98709	0	7.5683	4.98709		60	2.06168	11.4798	0	2.06168	11.4798
104	7.02643	4.7131	0	7.02643	4.7131		61	0.48996	12.4928	0	0.48996	12.4928
105	5.39789	5.90991	0	5.39789	5.90991		62	-0.222626	12.5429	0	-0.222626	12.5429
106	3.79156	6.29236	0	3.79156	6.29236		63	-1.68146	13.6071	0	-1.68146	13.6071
107	1.8847	8.02951	0	1.8847	8.02951		64	-2.70782	14.3965	0	-2.70782	14.3965
108	0.929321	8.91821	0	0.929321	8.91821		65	-3.9115	15.7682	0	-3.9115	15.7682
109	-1.66644	9.54779	0	-1.66644	9.54779		66	-4.1124	17.2617	0	-4.1124	17.2617
110	-4.8847	9.27655	0	-4.8847	9.27655		67	-4.69656	18.0277	0	-4.69656	18.0277
111	-6.76404	8.08987	0	-6.76404	8.08987		68	-5.51974	18.5367	0	-5.51974	18.5367
112	-4.71783	6.71469	0	-4.71783	6.71469		69	-6.42621	19.0367	0	-6.42621	19.0367
113	-4.50446	7.10538	0	-4.50446	7.10538		70	-7.1362	19.6611	0	-7.1362	19.6611
114	-5.03949	7.89795	0	-5.03949	7.89795		71	-7.18243	20.0148	0	-7.18243	20.0148
115	-5.24097	8.05261	0	-5.24097	8.05261		72	-8.18616	20.5161	0	-8.18616	20.5161
116	-5.5639	4.29572	0	-5.5639	4.29572		73	-8.43076	21.394	0	-8.43076	21.394
117	-5.82782	2.28174	0	-5.82782	2.28174		74	-8.43311	22.1478	0	-8.43311	22.1478
118	-7.49545	0.445679	0	-7.49545	0.445679		75	-9.03098	23.0329	0	-9.03098	23.0329
119	-10.0611	-1.05307	0	-10.0611	-1.05307		76	-9.93372	23.7096	0	-9.93372	23.7096
120	-9.46918	-3.89191	0	-9.46918	-3.89191		77	-10.9716	24.1427	0	-10.9716	24.1427
121	-8.69772	-1.71402	0	-8.69772	-1.71402		78	-11.4919	25.0366	0	-11.4919	25.0366
122	-7.96872	-2.40054	0	-7.96872	-2.40054		79	-12.0657	24.912	0	-12.0657	24.912
123	-9.35513	-5.27673	0	-9.35513	-5.27673		80	-13.2155	25.3051	0	-13.2155	25.3051
124	-11.4696	-4.15973	0	-11.4696	-4.15973		81	-13.6138	26.4649	0	-13.6138	26.4649
125	-12.7097	-1.93744	0	-12.7097	-1.93744		82	-14.3408	26.7291	0	-14.3408	26.7291
126	-13.7808	-1.80753	0	-13.7808	-1.80753		83	-14.9206	26.645	0	-14.9206	26.645
127	-13.2083	-3.22107	0	-13.2083	-3.22107		84	-14.8527	27.9976	0	-14.8527	27.9976
128	-11.0293	-5.49304	0	-11.0293	-5.49304		85	-15.1656	28.5378	0	-15.1656	28.5378
129	-9.17731	-8.00195	0	-9.17731	-8.00195		86	-16.2442	29.5798	0	-16.2442	29.5798
130	-8.61093	-7.53	0	-8.61093	-7.53		87	-16.4306	30.8566	0	-16.4306	30.8566
131	-8.10104	-8.06274	0	-8.10104	-8.06274		88	-17.3633	32.0053	0	-17.3633	32.0053
132	-7.54327	-7.88855	0	-7.54327	-7.88855		89	-18.2038	32.8403	0	-18.2038	32.8403
133	-7.97397	-8.32791	0	-7.97397	-8.32791		90	-19.1661	33.4626	0	-19.1661	33.4626
134	-7.27713	-8.38367	0	-7.27713	-8.38367		91	-19.2735	34.9235	0	-19.2735	34.9235
135	-5.99609	-7.98593	0	-5.99609	-7.98593		92	-19.7358	35.1884	0	-19.7358	35.1884
136	-7.14011	-7.55167	0	-7.14011	-7.55167		93	-20.8092	36.4047	0	-20.8092	36.4047
1	0	0	0	0	0		94	-21.475	39.218	0	-21.475	39.218
2	-0.110352	-0.881683	0	-0.110352	-0.881683		95	-23.2152	39.6877	0	-23.2152	39.6877
3	-0.209351	-1.2403	0	-0.209351	-1.2403		96	-23.865	39.8065	0	-23.865	39.8065
4	-0.313293	-1.19696	0	-0.313293	-1.19696		97	-23.6347	37.7546	0	-23.6347	37.7546
5	-0.539734	-0.722107	0	-0.539734	-0.722107		98	-24.5035	37.8452	0	-24.5035	37.8452
6	-0.543518	-0.125824	0	-0.543518	-0.125824		99	-25.9815	38.6614	0	-25.9815	38.6614
7	0.268921	-0.427216	0	0.268921	-0.427216		100	-24.3711	39.3441	0	-24.3711	39.3441
8	0.386841	-0.22052	0	0.386841	-0.22052		101	-24.8932	39.0375	0	-24.8932	39.0375
9	0.422852	-0.130249	0	0.422852	-0.130249		102	-30.0157	41.4647	0	-30.0157	41.4647
10	-2.07758	-1.30304	0	-2.07758	-1.30304		103	-31.1039	40.8105	0	-31.1039	40.8105
11	-0.404175	0.18045	0	-0.404175	0.18045		104	-31.5815	46.0187	0	-31.5815	46.0187
12	-0.39093	0.234039	0	-0.39093	0.234039		112	-32.845	44.0549	0	-32.845	44.0549
13	-0.3797	0.0717468	0	-0.3797	0.0717468		113	-35.5125	42.5872	0	-35.5125	42.5872
14	0.0289307	-0.140442	0	0.0289307	-0.140442		118	-42.3804	30.046	0	-42.3804	30.046
15	-1.75165	-1.12326	0	-1.75165	-1.12326		126	-40.4225	22.6982	0	-40.4225	22.6982
16	-0.267578	-0.343323	0	-0.267578	-0.343323		127	-39.9293	22.0206	0	-39.9293	22.0206
17	-0.604065	-0.097229	0	-0.604065	-0.097229		128	-40.576	20.8034	0	-40.576	20.8034
18	-0.395142	0.205475	0	-0.395142	0.205475		129	-40.1931	19.8118	0	-40.1931	19.8118
19	-6.7688	0.474487	0	-6.7688	0.474487		130	-39.9974	19.5413	0	-39.9974	19.5413
20	-6.5744	1.32874	0	-6.5744	1.32874		131	-39.7633	18.192	0	-39.7633	18.192
21	1.86279	0.647858	0	1.86279	0.647858		132	-38.9826	16.5501	0	-38.9826	16.5501
22	0.203857	2.92044	0	0.203857	2.92044		133	-38.6006	15.598	0	-38.6006	15.598
23	-0.229126	3.38266	0	-0.229126	3.38266		134	-38.231	16.2303	0	-38.231	16.2303
24	-7.47968	2.74472	0	-7.47968	2.74472		135	-38.4498	14.5861	0	-38.4498	14.5861
25	-7.87073	3.45255	0	-7.87073	3.45255		136	-38.66	13.6604	0	-38.66	13.6604
26	-1.22015	4.49542	0	-1.22015	4.49542		137	-38.3173	13.5056	0	-38.3173	13.5056
27	-1.52368	-1.02267	0	-1.52368	-1.02267		138	-38.3515	12.8115	0	-38.3515	12.8115
28	-1.34497	-0.627411	0	-1.34497	-0.627411		139	-38.0306	12.2516	0	-38.0306	12.2516
29	-0.648682	-0.618256	0	-0.648682	-0.618256		140	-37.6692	13.014	0	-37.6692	13.014
30	-8.74902	5.14612	0	-8.74902	5.14612		141	-37.8504	12.2958	0	-37.8504	12.2958
31	-0.963806	0.787842	0	-0.963806	0.787842		142	-37.44	11.7889	0	-37.44	11.7889
32	-1.07294	0.0417175	0	-1.07294	0.0417175		143	-36.7849	10.8542	0	-36.7849	10.8542
33	1.31079	0.565979	0	1.31079	0.565979		144	-36.1497	10.0662	0	-36.1497	10.0662
34	-1.12891	1.00485	0	-1.12891	1.00485		145	-35.5378	8.88623	0	-35.5378	8.88623
35	2.45416	1.08548	0	2.45416	1.08548		1	0	0	0	0	0
36	-8.38843	7.75116	0	-8.38843	7.75116		2	0.304871	-0.139862	0	0.304871	-0.139862
37	-0.848694	3.17038	0	-0.848694	3.17038		3	1.0191	-0.141113	0	1.0191	-0.141113
38	-0.512756	4.1506	0	-0.512756	4.1506		4	0.806641	-0.149261	0	0.806641	-0.149261
40	1.30646	5.41129	0	1.30646	5.41129		5	1.09875	-0.186554	0	1.09875	-0.186554
41	7.70752	10.3346	0	7.70752	10.3346		6	1.00555	-0.0622559	0	1.00555	-0.0622559
42	7.92438	10.9245	0	7.92438	10.9245		7	0.937683	-0.104889	0	0.937683	-0.104889
43	3.95551	8.74805	0	3.95551	8.74805		8	1.35541	0.0562134	0	1.35541	0.0562134
44	8.2171	11.5456	0	8.2171	11.5456		9	1.33765	0.436584	0	1.33765	0.436584
45	8.40979	11.7135	0	8.40979	11.7135		10	1.51794	0.850739	0	1.51794	0.850739
46	7.71509	11.3928	0	7.71509	11.3928		11	1.79755	0.929993	0	1.79755	0.929993
47	6.98993	11.3333	0	6.98993	11.3333		12	1.46899	0.730499	0	1.46899	0.730499
48	7.76941	13.1451	0	7.76941	13.1451		13	1.59735	0.46524	0	1.59735	0.46524
49	6.69562	13.5991	0	6.69562	13.5991		14	1.9068	0.829956	0	1.9068	0.829956
50	5.63129	13.1063	0	5.63129	13.1063		15	2.36218	0.994019	0	2.36218	0.994019
51	5.89606	13.5307	0	5.89606	13.5307		16	2.58496	0.662872	0	2.58496	0.662872
52	1.14392	12.1123	0	1.14392	12.1123		17	2.84186	0.448151	0	2.84186	0.448151
54	1.47937	13.5995	0	1.47937	13.5995		18	2.99567	-0.251007	0	2.99567	-0.251007
55	-0.170227	14.1749	0	-0.170227	14.1749		19	3.10358	-0.960205	0	3.10358	-0.960205
58	-1.89276	12.6267	0	-1.89276	12.6267		20	3.27618	-0.227997	0	3.27618	-0.227997
59	-13.6488	14.4177	0	-13.6488	14.4177		21	3.63055	-0.73172	0	3.63055	-0.73172
60	-11.0707	12.9198	0	-11.0707	12.9198		22	3.59265	-0.79483	0	3.59265	-0.79483
61	-5.02362	12.7002	0	-5.02362	12.7002		23	3.36664	-0.943176	0	3.36664	-0.943176
62	-6.16486	12.4645	0	-6.16486	12.4645		24	3.78973	-1.61597	0	3.78973	-1.61597
63	-7.49518	17.791	0	-7.49518	17.791		25	3.97638	-2.5939	0	3.97638	-2.5939
65	-1.28455	17.9555	0	-1.28455	17.9555		26	3.95453	-3.10532	0	3.95453	-3.10532
66	-7.5509	18.1524	0	-7.5509	18.1524		27	3.96521	-3.9278	0	3.96521	-3.9278
67	-9.53802	17.7005	0	-9.53802	17.7005		28	4.28717	-4.22522	0	4.28717	-4.22522
68	-21.1153	16.5941	0	-21.1153	16.5941		29	4.30548	-4.64667	0	4.30548	-4.64667
69	-28.198	18.5031	0	-28.198	18.5031		30	4.67902	-5.40085	0	4.67902	-5.40085
71	-35.3211	20.7408	0	-35.3211	20.7408		31	4.49249	-6.37836	0	4.49249	-6.37836
72	-30.4144	20.6882	0	-30.4144	20.6882		32	4.06439	-6.48453	0	4.06439	-6.48453
76	-32.6089	19.3333	0	-32.6089	19.3333		33	4.31537	-6.58014	0	4.31537	-6.58014
77	-33.1957	18.8819	0	-33.1957	18.8819		34	4.53278	-7.27463	0	4.53278	-7.27463
78	-33.8802	17.7549	0	-33.8802	17.7549		35	4.47626	-7.8779	0	4.47626	-7.8779
79	-27.7081	19.6039	0	-27.7081	19.6039		36	4.19995	-7.64432	0	4.19995	-7.64432
80	-27.4892	20.3463	0	-27.4892	20.3463		37	4.08496	-7.62018	0	4.08496	-7.62018
81	-25.6347	20.4828	0	-25.6347	20.4828		38	3.84888	-7.80798	0	3.84888	-7.80798
82	-25.309	19.4916	0	-25.309	19.4916		39	2.88031	-7.86938	0	2.88031	-7.86938
84	-25.2499	18.2159	0	-25.2499	18.2159		40	2.24225	-8.5144	0	2.24225	-8.5144
85	-25.2823	17.0968	0	-25.2823	17.0968		41	2.15363	-8.37357	0	2.15363	-8.37357
86	-30.4546	13.7044	0	-30.4546	13.7044		42	2.16919	-8.50726	0	2.16919	-8.50726
87	-31.1564	13.7684	0	-31.1564	13.7684		43	2.6123	-8.95255	0	2.6123	-8.95255
88	-31.4882	13.7642	0	-31.4882	13.7642		44	2.4585	-9.6048	0	2.4585	-9.6048
89	-31.2524	13.1344	0	-31.2524	13.1344		45	2.39197	-10.0825	0	2.39197	-10.0825
90	-32.3925	12.7224	0	-32.3925	12.7224		46	2.50854	-10.5644	0	2.50854	-10.5644
91	-31.5591	13.167	0	-31.5591	13.167		47	2.13422	-11.3235	0	2.13422	-11.3235
92	-27.6448	14.8249	0	-27.6448	14.8249		48	2.03052	-11.5982	0	2.03052	-11.5982
1	0	0	0	0	0		49	1.10358	-12.3842	0	1.10358	-12.3842
2	0.0369873	-0.224579	0	0.0369873	-0.224579		50	0.455017	-12.7115	0	0.455017	-12.7115
3	-0.384338	-0.628235	0	-0.384338	-0.628235		51	0.109497	-12.9377	0	0.109497	-12.9377
4	-0.279419	-0.226013	0	-0.279419	-0.226013		52	-0.435303	-13.7152	0	-0.435303	-13.7152
5	-0.533264	-0.665131	0	-0.533264	-0.665131		53	-0.821594	-13.9211	0	-0.821594	-13.9211
6	-0.38208	-0.200378	0	-0.38208	-0.200378		54	-1.26862	-14.7281	0	-1.26862	-14.7281
7	-0.812317	-0.541504	0	-0.812317	-0.541504		55	-1.51691	-15.3565	0	-1.51691	-15.3565
8	-0.835693	-0.627136	0	-0.835693	-0.627136		56	-2.1402	-15.5473	0	-2.1402	-15.5473
9	-1.20532	-0.749512	0	-1.20532	-0.749512		57	-2.18579	-15.4054	0	-2.18579	-15.4054
10	-0.928589	-0.980194	0	-0.928589	-0.980194		58	-2.77502	-15.4568	0	-2.77502	-15.4568
11	-0.884521	-0.122009	0	-0.884521	-0.122009		59	-3.06793	-16.0005	0	-3.06793	-16.0005
12	-1.00696	-0.0565491	0	-1.00696	-0.0565491		60	-3.12775	-16.263	0	-3.12775	-16.263
13	-0.67572	0.336365	0	-0.67572	0.336365		61	-3.69	-16.4774	0	-3.69	-16.4774
14	-0.49292	-0.0441895	0	-0.49292	-0.0441895		62	-3.6283	-17.1392	0	-3.6283	-17.1392
15	0.152771	-0.490417	0	0.152771	-0.490417		63	-3.73529	-17.3087	0	-3.73529	-17.3087
16	0.237183	-0.416107	0	0.237183	-0.416107		64	-4.45306	-17.1512	0	-4.45306	-17.1512
17	0.318115	-0.823425	0	0.318115	-0.823425		65	-4.8136	-17.2655	0	-4.8136	-17.2655
18	0.784546	-1.43713	0	0.784546	-1.43713		66	-5.72296	-17.1135	0	-5.72296	-17.1135
19	0.116638	-1.2149	0	0.116638	-1.2149		67	-5.85474	-17.4577	0	-5.85474	-17.4577
20	0.297424	-1.94067	0	0.297424	-1.94067		68	-5.68243	-17.8418	0	-5.68243	-17.8418
21	0.33075	-1.38449	0	0.33075	-1.38449		69	-5.86401	-18.2197	0	-5.86401	-18.2197
22	0.75708	-0.904175	0	0.75708	-0.904175		70	-6.83386	-18.1517	0	-6.83386	-18.1517
23	0.513794	-0.821259	0	0.513794	-0.821259		71	-6.67346	-18.581	0	-6.67346	-18.581
24	0.823059	-1.09967	0	0.823059	-1.09967		72	-7.47498	-18.6849	0	-7.47498	-18.6849
25	0.762939	-0.919769	0	0.762939	-0.919769		73	-8.13348	-18.881	0	-8.13348	-18.881
26	1.11298	-0.685303	0	1.11298	-0.685303		74	-8.27063	-19.0625	0	-8.27063	-19.0625
27	1.38837	-0.608521	0	1.38837	-0.608521		75	-8.91608	-19.1369	0	-8.91608	-19.1369
28	1.0863	-0.638885	0	1.0863	-0.638885		76	-9.10614	-19.6394	0	-9.10614	-19.6394
29	0.805115	-0.682343	0	0.805115	-0.682343		77	-10.0457	-19.6565	0	-10.0457	-19.6565
30	0.47406	-1.11331	0	0.47406	-1.11331		78	-11.211	-19.9799	0	-11.211	-19.9799
31	-0.431641	-0.275513	0	-0.431641	-0.275513		79	-11.7735	-20.3755	0	-11.7735	-20.3755
32	-0.820312	-0.804504	0	-0.820312	-0.804504		80	-13.1786	-20.8383	0	-13.1786	-20.8383
33	-0.571045	-0.682312	0	-0.571045	-0.682312		81	-13.4982	-21.8755	0	-13.4982	-21.8755
34	-0.890564	-0.559875	0	-0.890564	-0.559875		82	-13.6414	-23.1284	0	-13.6414	-23.1284
35	-1.21637	-1.155	0	-1.21637	-1.155		83	-14.3481	-23.635	0	-14.3481	-23.635
36	-1.43707	-1.41351	0	-1.43707	-1.41351		84	-15.1252	-23.2843	0	-15.1252	-23.2843
37	-1.91785	-1.79507	0	-1.91785	-1.79507		85	-15.9066	-24.9618	0	-15.9066	-24.9618
38	-2.02948	-2.03305	0	-2.02948	-2.03305		86	-16.2006	-25.4383	0	-16.2006	-25.4383
39	-2.23816	-1.68567	0	-2.23816	-1.68567		87	-16.6086	-25.8587	0	-16.6086	-25.8587
40	-2.49542	-2.88086	0	-2.49542	-2.88086		88	-16.9066	-25.9449	0	-16.9066	-25.9449
41	-3.38843	-2.84015	0	-3.38843	-2.84015		89	-17.0757	-26.9037	0	-17.0757	-26.9037
42	-4.0708	-3.06052	0	-4.0708	-3.06052		90	-17.2606	-27.0401	0	-17.2606	-27.0401
43	-4.12982	-3.69952	0	-4.12982	-3.69952		91	-17.6263	-28.1024	0	-17.6263	-28.1024
44	-5.05029	-3.91235	0	-5.05029	-3.91235		92	-17.8724	-28.3818	0	-17.8724	-28.3818
45	-4.70984	-2.71552	0	-4.70984	-2.71552		93	-18.0358	-28.9655	0	-18.0358	-28.9655
46	-5.37396	-2.88306	0	-5.37396	-2.88306		94	-18.1155	-29.4372	0	-18.1155	-29.4372
47	-4.40277	-2.45905	0	-4.40277	-2.45905		95	-18.4064	-29.7887	0	-18.4064	-29.7887
48	-5.79376	-2.95126	0	-5.79376	-2.95126		96	-18.2072	-30.7907	0	-18.2072	-30.7907
49	-3.48187	-2.06949	0	-3.48187	-2.06949		97	-18.3973	-30.4637	0	-18.3973	-30.4637
50	-3.21545	-2.09781	0	-3.21545	-2.09781		98	-20.6295	-27.7666	0	-20.6295	-27.7666
51	-3.31451	-1.88675	0	-3.31451	-1.88675		99	-18.7603	-31.204	0	-18.7603	-31.204
52	-2.89825	-2.09882	0	-2.89825	-2.09882		100	-17.8769	-32.623	0	-17.8769	-32.623
53	-3.05243	-1.90961	0	-3.05243	-1.90961		101	-17.7636	-32.3307	0	-17.7636	-32.3307
54	-3.77515	-1.80499	0	-3.77515	-1.80499		102	-17.0259	-32.4469	0	-17.0259	-32.4469
55	-1.37653	-2.1796	0	-1.37653	-2.1796		103	-16.1395	-32.5843	0	-16.1395	-32.5843
56	-1.72461	-3.1441	0	-1.72461	-3.1441		104	-15.6178	-32.8085	0	-15.6178	-32.8085
57	-1.82257	-3.8649	0	-1.82257	-3.8649		105	-15.513	-32.6718	0	-15.513	-32.6718
58	-1.18347	-4.01889	0	-1.18347	-4.01889		106	-15.0709	-32.8956	0	-15.0709	-32.8956
59	-1.5199	-4.29803	0	-1.5199	-4.29803		107	-14.7593	-33.0433	0	-14.7593	-33.0433
60	-2.79144	-4.91284	0	-2.79144	-4.91284		108	-14.9254	-32.9396	0	-14.9254	-32.9396
61	-2.12665	-4.43463	0	-2.12665	-4.43463		109	-14.9958	-33.4877	0	-14.9958	-33.4877
62	-2.52997	-3.75381	0	-2.52997	-3.75381		110	-15.4667	-34.6145	0	-15.4667	-34.6145
63	-1.7569	-4.20697	0	-1.7569	-4.20697		111	-16.1826	-36.2668	0	-16.1826	-36.2668
64	-2.49518	-4.44778	0	-2.49518	-4.44778		112	-16.3727	-37.9649	0	-16.3727	-37.9649
65	-2.38196	-4.74075	0	-2.38196	-4.74075		113	-15.9223	-39.3812	0	-15.9223	-39.3812
66	-2.20776	-5.12936	0	-2.20776	-5.12936		114	-16.0002	-40.5463	0	-16.0002	-40.5463
67	-5.0152	-6.26361	0	-5.0152	-6.26361		115	-14.9673	-41.9468	0	-14.9673	-41.9468
68	-4.38739	-6.45905	0	-4.38739	-6.45905		116	-15.2977	-43.6245	0	-15.2977	-43.6245
69	-1.40552	-4.9155	0	-1.40552	-4.9155		117	-16.1345	-44.4094	0	-16.1345	-44.4094
70	-4.42877	-6.84586	0	-4.42877	-6.84586		118	-15.9749	-44.6833	0	-15.9749	-44.6833
71	-2.86914	-6.56714	0	-2.86914	-6.56714		119	-15.584	-45.5959	0	-15.584	-45.5959
72	-4.11224	-6.01208	0	-4.11224	-6.01208		120	-15.7296	-45.4006	0	-15.7296	-45.4006
73	-3.91522	-6.26135	0	-3.91522	-6.26135		121	-15.8364	-45.7828	0	-15.8364	-45.7828
74	-1.92017	-6.74246	0	-1.92017	-6.74246		122	-16.2329	-45.787	0	-16.2329	-45.787
75	-3.02936	-7.3074	0	-3.02936	-7.3074		123	-16.8009	-45.8907	0	-16.8009	-45.8907
76	-2.59045	-7.09134	0	-2.59045	-7.09134		124	-17.2474	-45.8506	0	-17.2474	-45.8506
77	-4.56805	-4.34866	0	-4.56805	-4.34866		125	-17.7477	-45.184	0	-17.7477	-45.184
78	-4.74957	-4.30798	0	-4.74957	-4.30798		126	-18.7269	-45.6819	0	-18.7269	-45.6819
79	-2.19305	-1.90662	0	-2.19305	-1.90662		127	-19.957	-44.6549	0	-19.957	-44.6549
80	-2.46368	-1.78833	0	-2.46368	-1.78833		128	-20.4976	-45.5892	0	-20.4976	-45.5892
81	-1.56177	-3.71149	0	-1.56177	-3.71149		129	-21.2192	-44.9325	0	-21.2192	-44.9325
82	2.80658	-0.264618	0	2.80658	-0.264618		130	-22.2828	-45.722	0	-22.2828	-45.722
83	-4.30579	-4.17038	0	-4.30579	-4.17038		131	-23.5977	-48.4462	0	-23.5977	-48.4462
84	-1.73425	-0.578186	0	-1.73425	-0.578186		132	-22.8727	-49.7569	0	-22.8727	-49.7569
85	-1.34271	-0.84079	0	-1.34271	-0.84079		133	-24.1866	-51.373	0	-24.1866	-51.373
86	-0.817078	-0.866425	0	-0.817078	-0.866425		134	-24.8738	-52.1734	0	-24.8738	-52.1734
87	-1.11646	0.0240173	0	-1.11646	0.0240173		135	-24.3243	-52.8163	0	-24.3243	-52.8163
88	-5.05823	-3.61041	0	-5.05823	-3.61041		136	-25.9236	-54.6633	0	-25.9236	-54.6633
89	-4.32782	-3.57236	0	-4.32782	-3.57236		137	-27.455	-56.0251	0	-27.455	-56.0251
90	-3.63782	-4.27756	0	-3.63782	-4.27756		138	-28.6182	-56.5452	0	-28.6182	-56.5452
91	-3.33344	-3.2739	0	-3.33344	-3.2739		139	-27.608	-58.4244	0	-27.608	-58.4244
92	1.349	-0.215912	0	1.349	-0.215912		140	-26.766	-58.3195	0	-26.766	-58.3195
93	1.34192	0.824768	0	1.34192	0.824768		141	-23.9058	-59.0594	0	-23.9058	-59.0594
94	0.615845	1.80255	0	0.615845	1.80255		142	-19.3148	-59.7143	0	-19.3148	-59.7143
95	0.813477	3.03769	0	0.813477	3.03769		143	-16.7919	-57.9718	0	-16.7919	-57.9718
96	1.28442	3.57562	0	1.28442	3.57562		144	-17.0327	-60.0638	0	-17.0327	-60.0638
97	1.65491	4.35251	0	1.65491	4.35251		145	-14.7665	-54.663	0	-14.7665	-54.663
98	2.69507	5.10559	0	2.69507	5.10559		1	0	0	0	0	0
99	2.07526	5.82874	0	2.07526	5.82874		2	0.266296	0.443542	0	0.266296	0.443542
100	1.29175	6.85056	0	1.29175	6.85056		3	0.284576	0.180847	0	0.284576	0.180847
101	1.17255	8.43723	0	1.17255	8.43723		4	0.906036	-0.375244	0	0.906036	-0.375244
102	-2.45508	9.93497	0	-2.45508	9.93497		5	1.46875	-0.533936	0	1.46875	-0.533936
103	0.848694	10.4255	0	0.848694	10.4255		6	1.5545	-0.636597	0	1.5545	-0.636597
104	-2.08099	9.53168	0	-2.08099	9.53168		7	1.51923	-0.109314	0	1.51923	-0.109314
105	2.27643	9.41989	0	2.27643	9.41989		8	1.65485	0.0651855	0	1.65485	0.0651855
106	3.29156	8.50281	0	3.29156	8.50281		9	1.9549	-0.067688	0	1.9549	-0.067688
107	2.42328	8.93613	0	2.42328	8.93613		10	2.6156	0.121582	0	2.6156	0.121582
108	2.82404	10.0084	0	2.82404	10.0084		11	2.32074	1.21936	0	2.32074	1.21936
109	2.14288	10.0927	0	2.14288	10.0927		12	0.681396	1.31726	0	0.681396	1.31726
110	4.62128	12.5634	0	4.62128	12.5634		13	0.82077	1.21936	0	0.82077	1.21936
111	4.35059	13.4511	0	4.35059	13.4511		14	0.946686	0.170898	0	0.946686	0.170898
112	-0.0858765	12.1176	0	-0.0858765	12.1176		15	1.12766	0.693115	0	1.12766	0.693115
113	5.85779	14.8235	0	5.85779	14.8235		16	1.65668	0.316956	0	1.65668	0.316956
114	5.90295	14.9225	0	5.90295	14.9225		17	1.87915	0.794128	0	1.87915	0.794128
115	5.44385	14.7257	0	5.44385	14.7257		18	1.98926	-0.0484619	0	1.98926	-0.0484619
116	5.60211	14.8441	0	5.60211	14.8441		19	1.39053	0.179504	0	1.39053	0.179504
117	4.92651	14.5787	0	4.92651	14.5787		20	0.626556	-0.534424	0	0.626556	-0.534424
118	5.15521	15.394	0	5.15521	15.394		21	0.376373	-0.00585938	0	0.376373	-0.00585938
119	5.03809	15.0871	0	5.03809	15.0871		22	1.47165	-0.391235	0	1.47165	-0.391235
120	3.48926	15.5765	0	3.48926	15.5765		23	1.36832	-2.13824	0	1.36832	-2.13824
121	3.92084	15.5666	0	3.92084	15.5666		24	2.2254	-5.23187	0	2.2254	-5.23187
122	-1.41443	12.8029	0	-1.41443	12.8029		25	3.22189	-7.50464	0	3.22189	-7.50464
123	2.97015	15.3719	0	2.97015	15.3719		26	7.04968	-7.88141	0	7.04968	-7.88141
124	2.21692	14.5441	0	2.21692	14.5441		27	9.79492	-7.68524	0	9.79492	-7.68524
125	2.35284	14.5566	0	2.35284	14.5566		28	11.3015	-9.03845	0	11.3015	-9.03845
126	1.20319	12.0243	0	1.20319	12.0243		29	12.2244	-8.81152	0	12.2244	-8.81152
127	1.28949	11.6183	0	1.28949	11.6183		30	13.0918	-9.50391	0	13.0918	-9.50391
128	1.58551	14.9933	0	1.58551	14.9933		31	14.3803	-8.7171	0	14.3803	-8.7171
129	1.2309	14.8138	0	1.2309	14.8138		32	16.9255	-8.22968	0	16.9255	-8.22968
130	0.317993	11.4345	0	0.317993	11.4345		33	17.5095	-8.25311	0	17.5095	-8.25311
131	0.5271	16.8264	0	0.5271	16.8264		34	18.1718	-9.07849	0	18.1718	-9.07849
132	2.78918	17.315	0	2.78918	17.315		35	19.3734	-9.77704	0	19.3734	-9.77704
133	1.74432	17.1436	0	1.74432	17.1436		36	20.3372	-9.35858	0	20.3372	-9.35858
134	0.805481	17.3585	0	0.805481	17.3585		37	20.8345	-9.76971	0	20.8345	-9.76971
135	-2.76306	15.3517	0	-2.76306	15.3517		38	21.7254	-8.7243	0	21.7254	-8.7243
136	-2.9585	15.094	0	-2.9585	15.094		39	23.1913	-9.71741	0	23.1913	-9.71741
1	0	0	0	0	0		40	24.8067	-9.19446	0	24.8067	-9.19446
2	-0.340393	-0.962494	0	-0.340393	-0.962494		41	27.124	-9.48248	0	27.124	-9.48248
3	-0.106232	-1.27637	0	-0.106232	-1.27637		42	28.5484	-9.17847	0	28.5484	-9.17847
4	-0.242493	-1.43234	0	-0.242493	-1.43234		43	29.9971	-9.07764	0	29.9971	-9.07764
5	-0.26767	0.170593	0	-0.26767	0.170593		44	30.8799	-9.62592	0	30.8799	-9.62592
6	-0.164215	-0.417847	0	-0.164215	-0.417847		45	31.9252	-10.4981	0	31.9252	-10.4981
7	-0.653839	-0.843079	0	-0.653839	-0.843079		46	33.3914	-10.6719	0	33.3914	-10.6719
8	-1.0311	-0.772125	0	-1.0311	-0.772125		47	33.7664	-10.5644	0	33.7664	-10.5644
9	-0.914307	-0.566315	0	-0.914307	-0.566315		48	32.8336	-10.5465	0	32.8336	-10.5465
10	-0.981567	0.377563	0	-0.981567	0.377563		49	33.5626	-10.3526	0	33.5626	-10.3526
11	-1.55777	-0.463837	0	-1.55777	-0.463837		50	32.6836	-9.8584	0	32.6836	-9.8584
12	-2.16327	-1.14996	0	-2.16327	-1.14996		51	33.1074	-10.1411	0	33.1074	-10.1411
13	0.535034	9.82617	0	0.535034	9.82617		52	32.3231	-10.2092	0	32.3231	-10.2092
14	-2.61325	-0.913849	0	-2.61325	-0.913849		53	32.4379	-10.7696	0	32.4379	-10.7696
15	-2.86627	-0.889252	0	-2.86627	-0.889252		54	32.838	-10.6929	0	32.838	-10.6929
16	-2.57062	-0.766571	0	-2.57062	-0.766571		55	33.1681	-11.0348	0	33.1681	-11.0348
17	-2.51971	-1.40915	0	-2.51971	-1.40915		56	32.4853	-11.4603	0	32.4853	-11.4603
18	-2.20346	-1.07129	0	-2.20346	-1.07129		57	32.8251	-12.0685	0	32.8251	-12.0685
19	-2.31723	-1.33936	0	-2.31723	-1.33936		58	32.6222	-13.5314	0	32.6222	-13.5314
20	-2.47623	-1.8598	0	-2.47623	-1.8598		59	32.9541	-13.2065	0	32.9541	-13.2065
21	-2.2323	-2.15323	0	-2.2323	-2.15323		60	33.1033	-13.4153	0	33.1033	-13.4153
22	-2.43436	-1.75259	0	-2.43436	-1.75259		61	33.3409	-13.5525	0	33.3409	-13.5525
23	-2.28534	-1.91623	0	-2.28534	-1.91623		62	32.7369	-13.4054	0	32.7369	-13.4054
24	-1.99655	-1.73132	0	-1.99655	-1.73132		63	33.5539	-13.4233	0	33.5539	-13.4233
25	-1.91101	-1.15906	0	-1.91101	-1.15906		64	33.8709	-13.7123	0	33.8709	-13.7123
26	-1.74673	-1.80176	0	-1.74673	-1.80176		65	33.9776	-13.3179	0	33.9776	-13.3179
27	-1.51584	-0.664154	0	-1.51584	-0.664154		66	34.0524	-13.0241	0	34.0524	-13.0241
28	-2.09387	-1.05402	0	-2.09387	-1.05402		67	33.7454	-12.7448	0	33.7454	-12.7448
29	-2.15921	-1.76828	0	-2.15921	-1.76828		68	34.3898	-11.2964	0	34.3898	-11.2964
30	-2.40009	-1.10355	0	-2.40009	-1.10355		69	34.1638	-10.8762	0	34.1638	-10.8762
31	-2.23688	-1.2966	0	-2.23688	-1.2966		70	34.6534	-11.1237	0	34.6534	-11.1237
32	-1.81442	-0.810699	0	-1.81442	-0.810699		71	37.6472	-8.41547	0	37.6472	-8.41547
33	-2.00125	-0.880432	0	-2.00125	-0.880432		72	40.0216	-9.73761	0	40.0216	-9.73761
34	-1.97272	0.130249	0	-1.97272	0.130249		73	40.0567	-8.48181	0	40.0567	-8.48181
35	-2.40588	-1.01852	0	-2.40588	-1.01852		74	39.8192	-8.87402	0	39.8192	-8.87402
36	-2.43289	-0.507538	0	-2.43289	-0.507538		75	42.2241	-6.42413	0	42.2241	-6.42413
37	-2.65903	-0.988007	0	-2.65903	-0.988007		76	42.8194	-4.85199	0	42.8194	-4.85199
38	-2.90329	-0.689941	0	-2.90329	-0.689941		77	41.7883	-5.32404	0	41.7883	-5.32404
39	-2.35385	-0.529694	0	-2.35385	-0.529694		78	42.2837	-4.47693	0	42.2837	-4.47693
40	-3.04724	-1.23721	0	-3.04724	-1.23721		79	44.0372	-4.99542	0	44.0372	-4.99542
41	-2.87482	-1.53583	0	-2.87482	-1.53583		80	44.5885	-3.8584	0	44.5885	-3.8584
42	-3.37698	-1.95828	0	-3.37698	-1.95828		81	45.4542	-3.71173	0	45.4542	-3.71173
43	-3.4823	-1.49597	0	-3.4823	-1.49597		82	45.2249	-4.58356	0	45.2249	-4.58356
44	-3.96271	-1.74048	0	-3.96271	-1.74048		83	44.9305	-3.46619	0	44.9305	-3.46619
45	-4.15018	-1.75534	0	-4.15018	-1.75534		84	44.506	-3.39325	0	44.506	-3.39325
46	-4.26398	-1.21088	0	-4.26398	-1.21088		85	45.0639	-4.12048	0	45.0639	-4.12048
47	-4.04541	-1.89633	0	-4.04541	-1.89633		86	44.0376	-3.14648	0	44.0376	-3.14648
48	-3.70419	-0.817017	0	-3.70419	-0.817017		87	43.6492	-3.41956	0	43.6492	-3.41956
49	-3.80206	-1.18954	0	-3.80206	-1.18954		88	45.1684	-2.95831	0	45.1684	-2.95831
50	-3.67096	-0.50882	0	-3.67096	-0.50882		89	44.772	-3.20557	0	44.772	-3.20557
51	-2.97751	-0.883759	0	-2.97751	-0.883759		90	43.9675	-2.9137	0	43.9675	-2.9137
52	-2.5719	-0.585297	0	-2.5719	-0.585297		91	44.0062	-3.87598	0	44.0062	-3.87598
53	-2.55511	-0.83316	0	-2.55511	-0.83316		92	43.3837	-2.9787	0	43.3837	-2.9787
54	-2.36172	-0.848053	0	-2.36172	-0.848053		93	43.9524	-1.62811	0	43.9524	-1.62811
55	-2.86539	-1.47641	0	-2.86539	-1.47641		94	45.1324	-1.07434	0	45.1324	-1.07434
56	-2.51419	-0.780609	0	-2.51419	-0.780609		95	46.1465	-0.72644	0	46.1465	-0.72644
57	-3.62918	-0.711548	0	-3.62918	-0.711548		96	47.2128	-1.10785	0	47.2128	-1.10785
58	-4.05789	-0.890839	0	-4.05789	-0.890839		97	47.5514	-0.573242	0	47.5514	-0.573242
59	-3.78873	-0.607513	0	-3.78873	-0.607513		98	46.7502	-0.144104	0	46.7502	-0.144104
60	-3.5946	-0.486237	0	-3.5946	-0.486237		99	45.7383	-0.514404	0	45.7383	-0.514404
61	-3.8725	-0.692383	0	-3.8725	-0.692383		100	45.1965	-0.259399	0	45.1965	-0.259399
62	-4.29956	-0.87088	0	-4.29956	-0.87088		101	44.3831	2.76648	0	44.3831	2.76648
63	-3.84186	-1.69678	0	-3.84186	-1.69678		102	43.7375	5.29498	0	43.7375	5.29498
64	-3.34973	-1.66144	0	-3.34973	-1.66144		103	43.3671	7.4278	0	43.3671	7.4278
65	-3.65479	-2.18228	0	-3.65479	-2.18228		104	42.4885	9.10712	0	42.4885	9.10712
66	-3.6532	-2.24649	0	-3.6532	-2.24649		105	41.6516	8.41388	0	41.6516	8.41388
67	-3.24731	-2.3663	0	-3.24731	-2.3663		106	43.2488	11.262	0	43.2488	11.262
68	-3.08905	-2.67511	0	-3.08905	-2.67511		107	44.2577	14.2122	0	44.2577	14.2122
69	-2.99069	-2.93283	0	-2.99069	-2.93283		108	44.2691	14.5702	0	44.2691	14.5702
70	-2.17667	-2.68625	0	-2.17667	-2.68625		109	45.2473	15.5261	0	45.2473	15.5261
71	-2.7179	-4.49527	0	-2.7179	-4.49527		110	45.0312	15.819	0	45.0312	15.819
72	-2.83093	-4.37119	0	-2.83093	-4.37119		111	46.0247	15.8089	0	46.0247	15.8089
73	-2.66669	-4.69473	0	-2.66669	-4.69473		112	47.4942	14.1638	0	47.4942	14.1638
74	-2.4566	-4.78333	0	-2.4566	-4.78333		113	47.3595	12.5624	0	47.3595	12.5624
75	-2.53098	-5.71909	0	-2.53098	-5.71909		114	48.2972	11.5194	0	48.2972	11.5194
76	-2.53882	-5.55981	0	-2.53882	-5.55981		115	48.2152	9.13043	0	48.2152	9.13043
77	-2.89703	-5.30573	0	-2.89703	-5.30573		116	51.0323	11.1631	0	51.0323	11.1631
78	0.974396	4.44604	0	0.974396	4.44604		117	50.7491	11.5962	0	50.7491	11.5962
79	-3.83801	-6.02945	0	-3.83801	-6.02945		118	51.5888	13.4418	0	51.5888	13.4418
80	-3.02539	-4.73254	0	-3.02539	-4.73254		119	52.1846	12.8204	0	52.1846	12.8204
81	-3.04074	-5.05157	0	-3.04074	-5.05157		120	51.6291	12.3976	0	51.6291	12.3976
82	0.8078	2.84241	0	0.8078	2.84241		121	52.5097	13.0009	0	52.5097	13.0009
83	0.460907	2.38794	0	0.460907	2.38794		122	53.3272	12.1088	0	53.3272	12.1088
84	0.677582	2.04993	0	0.677582	2.04993		123	53.357	13.6864	0	53.357	13.6864
85	-0.407562	0.794434	0	-0.407562	0.794434		124	52.4276	15.7141	0	52.4276	15.7141
86	-0.209839	1.07336	0	-0.209839	1.07336		125	52.0065	17.9601	0	52.0065	17.9601
87	-4.05646	-6.33435	0	-4.05646	-6.33435		126	52.0622	18.1736	0	52.0622	18.1736
88	-1.34503	0.573303	0	-1.34503	0.573303		127	52.8353	19.2591	0	52.8353	19.2591
89	-4.98834	-7.86267	0	-4.98834	-7.86267		128	52.7842	18.8461	0	52.7842	18.8461
90	-2.08261	-1.61456	0	-2.08261	-1.61456		129	54.1215	17.0308	0	54.1215	17.0308
91	-4.30966	-3.70651	0	-4.30966	-3.70651		130	55.0493	17.9125	0	55.0493	17.9125
92	-3.25623	-1.03812	0	-3.25623	-1.03812		131	54.0186	19.0591	0	54.0186	19.0591
93	-2.48972	-0.89682	0	-2.48972	-0.89682		132	55.1978	18.8707	0	55.1978	18.8707
94	-6.68213	-10.138	0	-6.68213	-10.138		133	52.6379	18.2874	0	52.6379	18.2874
95	-6.65323	-9.60028	0	-6.65323	-9.60028		134	54.6185	17.4591	0	54.6185	17.4591
96	-6.1897	-9.25214	0	-6.1897	-9.25214		135	55.858	16.0802	0	55.858	16.0802
97	-7.24506	-9.78503	0	-7.24506	-9.78503		136	55.3242	16.1272	0	55.3242	16.1272
98	-2.53177	-2.84302	0	-2.53177	-2.84302		137	54.4652	17.2206	0	54.4652	17.2206
99	-6.57123	-10.1937	0	-6.57123	-10.1937		138	54.6526	18.326	0	54.6526	18.326
100	-3.08936	-4.97882	0	-3.08936	-4.97882		139	54.6325	18.8433	0	54.6325	18.8433
101	-3.44888	-5.41724	0	-3.44888	-5.41724		140	53.0648	18.8267	0	53.0648	18.8267
102	-3.59967	-2.53772	0	-3.59967	-2.53772		141	53.4693	18.6957	0	53.4693	18.6957
103	-2.9884	-2.23535	0	-2.9884	-2.23535		142	52.3669	18.5982	0	52.3669	18.5982
104	-3.79147	-4.25211	0	-3.79147	-4.25211		143	55.7441	18.1428	0	55.7441	18.1428
105	-4.97922	-12.9747	0	-4.97922	-12.9747		144	57.2845	18.0657	0	57.2845	18.0657
106	-4.0889	-3.28604	0	-4.0889	-3.28604		145	56.1734	17.7832	0	56.1734	17.7832
107	-3.93875	-4.38016	0	-3.93875	-4.38016		1	0	0	0	0	0
108	-2.58865	-6.44052	0	-2.58865	-6.44052		2	-0.058136	0.548645	0	-0.058136	0.548645
109	-4.42407	-3.91702	0	-4.42407	-3.91702		3	0.318848	1.17273	0	0.318848	1.17273
110	-10.0129	-13.6073	0	-10.0129	-13.6073		4	0.733246	1.09479	0	0.733246	1.09479
111	-5.74799	-5.27969	0	-5.74799	-5.27969		5	0.66507	1.13147	0	0.66507	1.13147
112	-5.73865	-6.10599	0	-5.73865	-6.10599		6	0.557404	1.39783	0	0.557404	1.39783
113	-5.22595	-16.375	0	-5.22595	-16.375		7	0.989502	1.06177	0	0.989502	1.06177
114	-4.99423	-6.89404	0	-4.99423	-6.89404		8	0.889191	1.47003	0	0.889191	1.47003
115	-4.31638	-6.70737	0	-4.31638	-6.70737		9	0.81897	1.35791	0	0.81897	1.35791
116	-5.03644	-6.77704	0	-5.03644	-6.77704		10	0.850922	1.02948	0	0.850922	1.02948
117	-4.10083	-6.51306	0	-4.10083	-6.51306		11	0.228882	1.1524	0	0.228882	1.1524
118	0.756042	-9.76904	0	0.756042	-9.76904		12	-1.40552	0.301941	0	-1.40552	0.301941
119	-2.31509	-5.62918	0	-2.31509	-5.62918		13	-2.09024	0.817993	0	-2.09024	0.817993
120	0.310211	-10.8337	0	0.310211	-10.8337		14	-3.67633	0.59552	0	-3.67633	0.59552
121	0.473694	-11.7642	0	0.473694	-11.7642		15	-3.04309	1.33722	0	-3.04309	1.33722
122	1.71564	-9.03885	0	1.71564	-9.03885		16	-3.60617	1.64648	0	-3.60617	1.64648
123	1.0061	-15.5329	0	1.0061	-15.5329		17	-4.04688	1.92517	0	-4.04688	1.92517
124	1.19006	-15.4051	0	1.19006	-15.4051		18	-4.44699	1.2489	0	-4.44699	1.2489
125	1.45828	-15.037	0	1.45828	-15.037		19	-4.75275	1.45935	0	-4.75275	1.45935
127	2.66629	-16.8965	0	2.66629	-16.8965		20	-4.78687	1.04926	0	-4.78687	1.04926
128	2.34372	-16.4057	0	2.34372	-16.4057		21	-4.91266	1.31549	0	-4.91266	1.31549
129	1.8114	-16.6151	0	1.8114	-16.6151		22	-4.67841	1.68152	0	-4.67841	1.68152
130	1.51535	-18.1189	0	1.51535	-18.1189		23	-5.11871	1.71429	0	-5.11871	1.71429
131	1.55103	-18.5842	0	1.55103	-18.5842		24	-5.9581	1.78351	0	-5.9581	1.78351
132	1.45123	-17.8512	0	1.45123	-17.8512		25	-6.27966	1.8266	0	-6.27966	1.8266
133	1.2338	-17.5237	0	1.2338	-17.5237		26	-6.31723	2.19434	0	-6.31723	2.19434
134	0.82373	-16.8043	0	0.82373	-16.8043		27	-6.60071	2.48712	0	-6.60071	2.48712
135	-0.155029	-17.0108	0	-0.155029	-17.0108		28	-5.90472	2.53583	0	-5.90472	2.53583
136	-1.19144	-15.9241	0	-1.19144	-15.9241		29	-6.78976	2.0224	0	-6.78976	2.0224
1	0	0	0	0	0		30	-6.57568	2.11005	0	-6.57568	2.11005
2	0.677826	0.187378	0	0.677826	0.187378		31	-6.64999	2.35071	0	-6.64999	2.35071
3	0.834686	0.495148	0	0.834686	0.495148		32	-6.45901	3.16736	0	-6.45901	3.16736
4	1.0723	0.249634	0	1.0723	0.249634		33	-6.59323	2.24213	0	-6.59323	2.24213
5	2.9632	2.05835	0	2.9632	2.05835		34	-6.83798	1.73663	0	-6.83798	1.73663
6	2.46225	0.607178	0	2.46225	0.607178		35	-6.97986	2.0636	0	-6.97986	2.0636
7	2.64105	1.13522	0	2.64105	1.13522		36	-7.20459	1.83398	0	-7.20459	1.83398
8	2.98044	0.642761	0	2.98044	0.642761		37	-6.98691	1.77673	0	-6.98691	1.77673
9	2.65286	0.510834	0	2.65286	0.510834		38	-6.39856	0.983582	0	-6.39856	0.983582
10	2.84836	0.983215	0	2.84836	0.983215		39	-6.32013	1.22589	0	-6.32013	1.22589
11	2.6376	2.2843	0	2.6376	2.2843		40	-6.45407	0.991333	0	-6.45407	0.991333
12	1.64359	0.934143	0	1.64359	0.934143		41	-6.50842	0.511597	0	-6.50842	0.511597
13	2.62183	0.911133	0	2.62183	0.911133		42	-6.56546	1.09595	0	-6.56546	1.09595
14	3.28503	1.59396	0	3.28503	1.59396		43	-6.612	0.915588	0	-6.612	0.915588
15	3.00354	1.63037	0	3.00354	1.63037		44	-6.92078	1.11047	0	-6.92078	1.11047
16	3.51208	2.59915	0	3.51208	2.59915		45	-6.90604	1.13556	0	-6.90604	1.13556
17	4.12546	2.64789	0	4.12546	2.64789		46	-6.80551	1.60297	0	-6.80551	1.60297
18	4.94791	2.89401	0	4.94791	2.89401		47	-7.16422	1.52563	0	-7.16422	1.52563
19	4.51477	2.6442	0	4.51477	2.6442		48	-7.25421	2.31842	0	-7.25421	2.31842
20	5.70294	3.49527	0	5.70294	3.49527		49	-7.62134	3.2818	0	-7.62134	3.2818
21	4.69644	3.30939	0	4.69644	3.30939		50	-7.64139	3.43213	0	-7.64139	3.43213
23	4.92725	2.75677	0	4.92725	2.75677		51	-7.9436	3.85364	0	-7.9436	3.85364
24	4.66211	2.70087	0	4.66211	2.70087		52	-7.8132	4.29333	0	-7.8132	4.29333
26	5.42108	3.69794	0	5.42108	3.69794		53	-7.70053	4.47058	0	-7.70053	4.47058
27	4.74899	1.95285	0	4.74899	1.95285		54	-7.30579	4.87067	0	-7.30579	4.87067
29	4.31067	1.63644	0	4.31067	1.63644		55	-7.42429	5.34808	0	-7.42429	5.34808
30	3.52017	2.38464	0	3.52017	2.38464		56	-7.56775	5.64136	0	-7.56775	5.64136
32	5.10193	4.22293	0	5.10193	4.22293		57	-7.17474	6.13275	0	-7.17474	6.13275
33	4.37119	4.74484	0	4.37119	4.74484		58	-6.42557	5.58948	0	-6.42557	5.58948
34	5.46036	5.19977	0	5.46036	5.19977		59	-7.13806	6.49622	0	-7.13806	6.49622
35	6.87094	5.85764	0	6.87094	5.85764		60	-6.79242	6.53223	0	-6.79242	6.53223
36	8.26038	7.02646	0	8.26038	7.02646		61	-6.60236	7.12964	0	-6.60236	7.12964
37	8.23569	6.86224	0	8.23569	6.86224		62	-7.13367	9.46228	0	-7.13367	9.46228
38	8.12732	7.05237	0	8.12732	7.05237		63	-7.45215	8.73358	0	-7.45215	8.73358
39	7.12659	9.19614	0	7.12659	9.19614		64	-7.39175	8.71851	0	-7.39175	8.71851
40	7.49298	8.48032	0	7.49298	8.48032		65	-7.00635	8.92505	0	-7.00635	8.92505
41	8.27536	8.8049	0	8.27536	8.8049		66	-6.03333	8.82013	0	-6.03333	8.82013
42	8.68747	6.82724	0	8.68747	6.82724		67	-7.11612	9.22339	0	-7.11612	9.22339
43	8.25244	9.74155	0	8.25244	9.74155		68	-7.32642	9.68634	0	-7.32642	9.68634
44	8.04752	10.5124	0	8.04752	10.5124		69	-7.13336	9.76819	0	-7.13336	9.76819
45	7.07935	9.64679	0	7.07935	9.64679		70	-7.18143	10.4004	0	-7.18143	10.4004
46	6.14331	10.8733	0	6.14331	10.8733		71	-7.09265	9.74902	0	-7.09265	9.74902
47	7.94333	10.1229	0	7.94333	10.1229		72	-8.20041	10.3333	0	-8.20041	10.3333
48	6.42337	11.7671	0	6.42337	11.7671		73	-9.82559	11.7927	0	-9.82559	11.7927
49	6.4938	12.1151	0	6.4938	12.1151		74	-10.5336	12.8696	0	-10.5336	12.8696
50	7.12622	12.2899	0	7.12622	12.2899		75	-10.7155	13.0405	0	-10.7155	13.0405
51	9.29785	12.4281	0	9.29785	12.4281		76	-9.55899	12.5385	0	-9.55899	12.5385
52	9.22696	14.0436	0	9.22696	14.0436		77	-9.56985	13.1726	0	-9.56985	13.1726
53	9.60831	14.2433	0	9.60831	14.2433		78	-8.82675	12.7303	0	-8.82675	12.7303
54	10.7856	13.9068	0	10.7856	13.9068		79	-9.00888	13.3643	0	-9.00888	13.3643
55	8.41354	11.8692	0	8.41354	11.8692		80	-9.30804	12.1954	0	-9.30804	12.1954
56	10.3963	13.0109	0	10.3963	13.0109		81	-9.74991	11.9828	0	-9.74991	11.9828
57	11.129	12.9117	0	11.129	12.9117		82	-9.94208	12.3108	0	-9.94208	12.3108
58	12.0763	15.0414	0	12.0763	15.0414		83	-9.21243	12.1671	0	-9.21243	12.1671
59	12.379	16.4164	0	12.379	16.4164		84	-8.49506	13.5033	0	-8.49506	13.5033
61	15.5099	15.5825	0	15.5099	15.5825		85	-7.8963	13.8909	0	-7.8963	13.8909
62	15.8862	20.4322	0	15.8862	20.4322		86	-7.49289	14.4751	0	-7.49289	14.4751
63	15.1653	19.0609	0	15.1653	19.0609		87	-7.93134	14.7003	0	-7.93134	14.7003
64	14.6791	20.6977	0	14.6791	20.6977		88	-7.30984	15.202	0	-7.30984	15.202
65	15.154	19.5131	0	15.154	19.5131		89	-8.69254	17.2076	0	-8.69254	17.2076
66	17.266	21.2218	0	17.266	21.2218		90	-7.14197	15.9301	0	-7.14197	15.9301
68	15.0207	22.1084	0	15.0207	22.1084		91	-8.62704	16.4079	0	-8.62704	16.4079
69	15.79	23.317	0	15.79	23.317		92	-7.29221	15.5077	0	-7.29221	15.5077
70	16.9248	23.967	0	16.9248	23.967		93	-8.62631	15.4949	0	-8.62631	15.4949
71	14.7133	15.6558	0	14.7133	15.6558		94	-6.2034	14.7258	0	-6.2034	14.7258
72	17.4223	25.6045	0	17.4223	25.6045		95	-5.45154	14.7786	0	-5.45154	14.7786
73	18.7802	21.0409	0	18.7802	21.0409		96	-7.00751	15.4874	0	-7.00751	15.4874
75	19.8845	21.6228	0	19.8845	21.6228		97	-8.82599	14.6182	0	-8.82599	14.6182
76	20.6063	19.9842	0	20.6063	19.9842		98	-10.7705	13.0164	0	-10.7705	13.0164
77	21.1934	20.0083	0	21.1934	20.0083		99	-11.8671	12.1786	0	-11.8671	12.1786
78	21.9104	20.7167	0	21.9104	20.7167		100	-12.7585	11.3885	0	-12.7585	11.3885
79	22.0576	20.6791	0	22.0576	20.6791		101	-12.7979	10.8261	0	-12.7979	10.8261
81	23.7281	22.3597	0	23.7281	22.3597		102	-17.7032	3.59045	0	-17.7032	3.59045
82	24.0331	21.4515	0	24.0331	21.4515		103	-17.3189	1.76337	0	-17.3189	1.76337
83	24.1609	22.4216	0	24.1609	22.4216		104	-17.2466	1.21594	0	-17.2466	1.21594
85	23.7251	21.8515	0	23.7251	21.8515		105	-17.6052	0.510193	0	-17.6052	0.510193
86	24.327	20.978	0	24.327	20.978		106	-16.1304	1.62689	0	-16.1304	1.62689
88	24.802	19.9597	0	24.802	19.9597		107	-17.0119	0.542908	0	-17.0119	0.542908
89	25.6553	19.927	0	25.6553	19.927		108	-12.393	5.60284	0	-12.393	5.60284
90	25.4283	20.4641	0	25.4283	20.4641		109	-9.87018	6.70087	0	-9.87018	6.70087
91	24.1113	21.5063	0	24.1113	21.5063		110	-8.17163	7.47217	0	-8.17163	7.47217
92	25.7819	19.4277	0	25.7819	19.4277		111	-7.50742	7.87115	0	-7.50742	7.87115
94	23.5779	22.1693	0	23.5779	22.1693		112	-5.89536	8.09222	0	-5.89536	8.09222
95	24.1249	21.1523	0	24.1249	21.1523		113	-5.83539	8.40814	0	-5.83539	8.40814
96	24.0572	22.4378	0	24.0572	22.4378		114	-4.28287	7.98541	0	-4.28287	7.98541
98	25.2902	18.0316	0	25.2902	18.0316		115	-2.92725	7.10797	0	-2.92725	7.10797
99	24.1195	22.4288	0	24.1195	22.4288		116	-3.02094	6.80927	0	-3.02094	6.80927
100	25.2018	17.7523	0	25.2018	17.7523		117	-3.64267	7.28888	0	-3.64267	7.28888
101	25.7394	21.1452	0	25.7394	21.1452		118	-3.61542	7.94415	0	-3.61542	7.94415
102	25.6334	18.2682	0	25.6334	18.2682		119	-2.48306	7.61139	0	-2.48306	7.61139
103	29.4755	18.814	0	29.4755	18.814		120	-2.71689	7.68439	0	-2.71689	7.68439
104	30.373	19.1923	0	30.373	19.1923		121	-2.38379	7.4577	0	-2.38379	7.4577
105	29.152	17.7487	0	29.152	17.7487		122	-1.96344	6.92377	0	-1.96344	6.92377
106	30.195	16.8769	0	30.195	16.8769		123	-1.99265	7.44031	0	-1.99265	7.44031
107	30.9589	17.5505	0	30.9589	17.5505		124	-1.91779	7.79535	0	-1.91779	7.79535
108	28.7926	18.5739	0	28.7926	18.5739		125	-2.00525	7.51056	0	-2.00525	7.51056
109	29.1237	17.2106	0	29.1237	17.2106		126	-2.30826	7.56281	0	-2.30826	7.56281
110	29.4775	14.7841	0	29.4775	14.7841		127	-2.18015	7.98602	0	-2.18015	7.98602
111	31.5755	16.8661	0	31.5755	16.8661		128	-1.46936	7.04224	0	-1.46936	7.04224
112	30.2748	13.6187	0	30.2748	13.6187		129	-1.14297	6.82111	0	-1.14297	6.82111
113	30.6799	13.2772	0	30.6799	13.2772		130	-1.18283	6.80292	0	-1.18283	6.80292
114	30.4785	17.0018	0	30.4785	17.0018		131	-0.287018	7.05786	0	-0.287018	7.05786
115	30.0259	14.1896	0	30.0259	14.1896		132	-0.483398	7.0899	0	-0.483398	7.0899
116	30.1432	13.4737	0	30.1432	13.4737		133	-0.630585	6.35822	0	-0.630585	6.35822
117	30.1784	13.965	0	30.1784	13.965		134	-0.056366	6.86487	0	-0.056366	6.86487
118	32.4187	18.5295	0	32.4187	18.5295		135	-0.0811157	6.72998	0	-0.0811157	6.72998
119	27.9128	9.15546	0	27.9128	9.15546		136	-0.399109	6.68872	0	-0.399109	6.68872
120	26.8863	9.20642	0	26.8863	9.20642		137	-0.0662537	7.05066	0	-0.0662537	7.05066
121	25.8684	8.62411	0	25.8684	8.62411		138	-0.824677	6.76227	0	-0.824677	6.76227
122	25.5708	8.87335	0	25.5708	8.87335		139	-1.5556	6.03229	0	-1.5556	6.03229
123	25.7538	7.01117	0	25.7538	7.01117		140	-0.842346	6.12396	0	-0.842346	6.12396
124	26.7536	9.57367	0	26.7536	9.57367		141	-1.3075	6.49951	0	-1.3075	6.49951
125	26.8604	8.74368	0	26.8604	8.74368		142	-1.24454	6.18408	0	-1.24454	6.18408
126	27.3511	10.2076	0	27.3511	10.2076		143	-0.951385	5.78918	0	-0.951385	5.78918
127	27.5795	10.855	0	27.5795	10.855		144	-1.00787	6.22021	0	-1.00787	6.22021
128	28.6271	10.2216	0	28.6271	10.2216		145	-0.838928	6.18915	0	-0.838928	6.18915
129	29.4246	9.23856	0	29.4246	9.23856		1	0	0	0	0	0
130	29.6307	6.99136	0	29.6307	6.99136		2	-0.406555	0.665314	0	-0.406555	0.665314
131	33.4607	10.4188	0	33.4607	10.4188		3	0.453491	0.865021	0	0.453491	0.865021
132	33.5295	10.1308	0	33.5295	10.1308		4	-0.223755	1.49081	0	-0.223755	1.49081
133	33.1769	9.60004	0	33.1769	9.60004		5	-0.362549	0.114777	0	-0.362549	0.114777
134	35.0743	14.3549	0	35.0743	14.3549		6	0.399414	-0.67215	0	0.399414	-0.67215
135	31.9601	6.38742	0	31.9601	6.38742		7	0.470276	-0.558472	0	0.470276	-0.558472
1	0	0	0	0	0		8	-1.07062	-0.535065	0	-1.07062	-0.535065
2	0.307861	-0.181274	0	0.307861	-0.181274		9	-1.78848	-0.465271	0	-1.78848	-0.465271
3	0.464111	0.0325317	0	0.464111	0.0325317		10	-5.15906	-0.0293274	0	-5.15906	-0.0293274
4	0.342285	-0.167725	0	0.342285	-0.167725		11	-11.729	-8.38892	0	-11.729	-8.38892
5	-0.133728	-0.699341	0	-0.133728	-0.699341		12	-11.4218	-8.96106	0	-11.4218	-8.96106
6	-0.20047	-0.350037	0	-0.20047	-0.350037		13	-11.209	-8.67941	0	-11.209	-8.67941
7	-0.074585	-0.236938	0	-0.074585	-0.236938		14	-11.0466	-8.47702	0	-11.0466	-8.47702
8	-0.244904	-0.426453	0	-0.244904	-0.426453		15	-11.4628	-7.96118	0	-11.4628	-7.96118
9	-0.186646	-0.533325	0	-0.186646	-0.533325		16	-11.659	-7.42227	0	-11.659	-7.42227
10	-0.302704	-0.0194702	0	-0.302704	-0.0194702		17	-12.7776	-7.22113	0	-12.7776	-7.22113
11	-1.01205	0.000793457	0	-1.01205	0.000793457		18	-12.3909	-7.22787	0	-12.3909	-7.22787
12	-2.5549	0.298401	0	-2.5549	0.298401		19	-12.3165	-6.97928	0	-12.3165	-6.97928
13	-1.65656	-0.172607	0	-1.65656	-0.172607		20	-12.5077	-6.28751	0	-12.5077	-6.28751
14	-1.16812	-0.306946	0	-1.16812	-0.306946		21	-12.4151	-5.73541	0	-12.4151	-5.73541
15	-2.81036	-0.0450439	0	-2.81036	-0.0450439		22	-12.7454	-6.73001	0	-12.7454	-6.73001
16	-2.42566	0.354492	0	-2.42566	0.354492		23	-13.3469	-5.79819	0	-13.3469	-5.79819
17	-3.35876	-0.124878	0	-3.35876	-0.124878		24	-13.3068	-5.9057	0	-13.3068	-5.9057
18	-3.26965	-0.00744629	0	-3.26965	-0.00744629		25	-13.5198	-5.71283	0	-13.5198	-5.71283
19	-2.60205	0.317139	0	-2.60205	0.317139		26	-13.3386	-5.14597	0	-13.3386	-5.14597
20	-2.44669	0.521545	0	-2.44669	0.521545		27	-13.6292	-5.14526	0	-13.6292	-5.14526
21	-1.69196	0.0794067	0	-1.69196	0.0794067		28	-13.6637	-4.78949	0	-13.6637	-4.78949
22	-1.12152	0.0881348	0	-1.12152	0.0881348		29	-12.7924	-4.87115	0	-12.7924	-4.87115
23	-1.50879	0.0186157	0	-1.50879	0.0186157		30	-13.2214	-4.5358	0	-13.2214	-4.5358
24	-1.00812	-1.21356	0	-1.00812	-1.21356		31	-13.7693	-4.98242	0	-13.7693	-4.98242
25	-0.765594	-1.32251	0	-0.765594	-1.32251		32	-13.5773	-4.62488	0	-13.5773	-4.62488
26	-0.932739	-1.74927	0	-0.932739	-1.74927		33	-13.1135	-4.66467	0	-13.1135	-4.66467
27	-0.321075	-1.72784	0	-0.321075	-1.72784		34	-13.54	-4.21573	0	-13.54	-4.21573
28	-0.623108	-2.29144	0	-0.623108	-2.29144		35	-13.3761	-4.84329	0	-13.3761	-4.84329
29	0.0849609	-1.70624	0	0.0849609	-1.70624		36	-13.4886	-4.59506	0	-13.4886	-4.59506
30	-0.0938721	-1.45691	0	-0.0938721	-1.45691		37	-13.7738	-4.5614	0	-13.7738	-4.5614
31	-0.757751	-1.70416	0	-0.757751	-1.70416		38	-13.4589	-4.13974	0	-13.4589	-4.13974
32	0.125305	-2.27606	0	0.125305	-2.27606		39	-13.3658	-4.31784	0	-13.3658	-4.31784
33	0.628448	-3.08252	0	0.628448	-3.08252		40	-13.5826	-3.8862	0	-13.5826	-3.8862
34	0.539703	-2.99591	0	0.539703	-2.99591		41	-13.5817	-4.19415	0	-13.5817	-4.19415
35	0.67572	-2.8587	0	0.67572	-2.8587		42	-13.3357	-4.2475	0	-13.3357	-4.2475
36	0.808868	-3.18066	0	0.808868	-3.18066		43	-13.6509	-4.76178	0	-13.6509	-4.76178
37	0.728149	-3.15643	0	0.728149	-3.15643		44	-13.7834	-4.11349	0	-13.7834	-4.11349
38	-0.00631714	-2.77826	0	-0.00631714	-2.77826		45	-13.8508	-3.90906	0	-13.8508	-3.90906
39	-0.0638428	-2.86169	0	-0.0638428	-2.86169		46	-14.1597	-3.29382	0	-14.1597	-3.29382
40	0.914215	-3.28906	0	0.914215	-3.28906		47	-14.4137	-3.64218	0	-14.4137	-3.64218
41	1.08737	-3.26862	0	1.08737	-3.26862		48	-14.5989	-3.06708	0	-14.5989	-3.06708
42	-0.13681	-3.85785	0	-0.13681	-3.85785		49	-14.2769	-3.13504	0	-14.2769	-3.13504
43	0.495178	-3.74988	0	0.495178	-3.74988		50	-14.6437	-2.99802	0	-14.6437	-2.99802
44	-1.0528	-3.79517	0	-1.0528	-3.79517		51	-14.8608	-3.44247	0	-14.8608	-3.44247
45	-1.98209	-2.89215	0	-1.98209	-2.89215		52	-15.4607	-3.35599	0	-15.4607	-3.35599
46	-1.59082	-2.50647	0	-1.59082	-2.50647		53	-15.4997	-2.82269	0	-15.4997	-2.82269
47	-1.728	-2.23291	0	-1.728	-2.23291		54	-15.7023	-3.11502	0	-15.7023	-3.11502
48	-1.49472	-0.259155	0	-1.49472	-0.259155		55	-16.5765	-2.96805	0	-16.5765	-2.96805
49	-0.631378	0.408325	0	-0.631378	0.408325		56	-16.5977	-2.64651	0	-16.5977	-2.64651
50	-0.328186	2.66052	0	-0.328186	2.66052		57	-17.6044	-3.21457	0	-17.6044	-3.21457
51	0.626556	3.03943	0	0.626556	3.03943		58	-16.4478	-2.96417	0	-16.4478	-2.96417
52	-0.0180664	2.05908	0	-0.0180664	2.05908		59	-17.2019	-3.18451	0	-17.2019	-3.18451
53	-0.917297	1.40063	0	-0.917297	1.40063		60	-16.6245	-2.21509	0	-16.6245	-2.21509
54	-0.791107	1.23907	0	-0.791107	1.23907		61	-17.9594	-2.58206	0	-17.9594	-2.58206
55	0.204987	1.43341	0	0.204987	1.43341		62	-17.9617	-2.52322	0	-17.9617	-2.52322
56	1.32809	-0.365845	0	1.32809	-0.365845		63	-18.2068	-1.18814	0	-18.2068	-1.18814
57	1.36658	-0.101318	0	1.36658	-0.101318		64	-18.0097	-0.417145	0	-18.0097	-0.417145
58	1.33493	0.127258	0	1.33493	0.127258		65	-18.2878	0.612488	0	-18.2878	0.612488
59	1.89273	2.16681	0	1.89273	2.16681		66	-18.543	1.64578	0	-18.543	1.64578
60	1.78265	2.5896	0	1.78265	2.5896		67	-18.6866	1.69937	0	-18.6866	1.69937
61	2.27792	3.771	0	2.27792	3.771		68	-18.2447	2.60519	0	-18.2447	2.60519
62	2.86249	4.67163	0	2.86249	4.67163		69	-18.1284	4.3038	0	-18.1284	4.3038
63	3.72684	4.13904	0	3.72684	4.13904		70	-18.2905	4.76315	0	-18.2905	4.76315
64	3.39151	4.33832	0	3.39151	4.33832		71	-18.2076	5.98212	0	-18.2076	5.98212
65	3.53317	5.20917	0	3.53317	5.20917		72	-18.2853	6.94016	0	-18.2853	6.94016
66	3.77197	4.02301	0	3.77197	4.02301		73	-18.1603	7.20657	0	-18.1603	7.20657
67	3.51086	1.64984	0	3.51086	1.64984		74	-18.0653	7.8324	0	-18.0653	7.8324
68	4.202	1.00262	0	4.202	1.00262		75	-18.4263	8.42725	0	-18.4263	8.42725
69	3.91687	-0.740479	0	3.91687	-0.740479		76	-18.205	8.52252	0	-18.205	8.52252
70	2.66025	-0.083252	0	2.66025	-0.083252		77	-17.967	9.39557	0	-17.967	9.39557
71	0.199097	-0.411438	0	0.199097	-0.411438		78	-18.7404	10.1068	0	-18.7404	10.1068
72	-0.441284	-1.25739	0	-0.441284	-1.25739		79	-17.8929	10.7644	0	-17.8929	10.7644
73	-0.112854	-1.61273	0	-0.112854	-1.61273		80	-17.8721	11.2297	0	-17.8721	11.2297
74	-1.55792	-2.29321	0	-1.55792	-2.29321		81	-18.3942	12.1107	0	-18.3942	12.1107
75	-1.50397	-1.99597	0	-1.50397	-1.99597		82	-17.7631	12.6956	0	-17.7631	12.6956
76	-0.688538	-1.59967	0	-0.688538	-1.59967		83	-17.9367	13.7129	0	-17.9367	13.7129
77	-1.00342	-1.08649	0	-1.00342	-1.08649		84	-17.3041	14.5815	0	-17.3041	14.5815
78	-1.76282	-1.08167	0	-1.76282	-1.08167		85	-16.5736	15.3336	0	-16.5736	15.3336
79	-1.50177	-1.65656	0	-1.50177	-1.65656		86	-16.9758	15.2249	0	-16.9758	15.2249
80	-2.54904	-1.80109	0	-2.54904	-1.80109		87	-16.8083	15.8066	0	-16.8083	15.8066
81	-2.29379	-2.59619	0	-2.29379	-2.59619		88	-16.7285	15.5244	0	-16.7285	15.5244
82	-1.853	-2.70038	0	-1.853	-2.70038		89	-16.8597	15.6304	0	-16.8597	15.6304
83	-1.85519	-3.22638	0	-1.85519	-3.22638		90	-16.6042	15.9835	0	-16.6042	15.9835
84	-2.44995	-5.48401	0	-2.44995	-5.48401		91	-15.8977	16.4461	0	-15.8977	16.4461
85	-1.49725	-7.12671	0	-1.49725	-7.12671		92	-15.5418	16.154	0	-15.5418	16.154
86	-3.06473	-8.93176	0	-3.06473	-8.93176		93	-14.5826	15.5558	0	-14.5826	15.5558
87	-3.64313	-9.92126	0	-3.64313	-9.92126		94	-13.3266	16.0727	0	-13.3266	16.0727
88	-5.37213	-10.3799	0	-5.37213	-10.3799		95	-11.9593	15.9418	0	-11.9593	15.9418
89	-4.65475	-10.7202	0	-4.65475	-10.7202		96	-10.8184	16.4093	0	-10.8184	16.4093
90	-4.77521	-10.8575	0	-4.77521	-10.8575		97	-9.82437	16.2303	0	-9.82437	16.2303
91	-5.58307	-11.4612	0	-5.58307	-11.4612		98	-8.73141	16.5735	0	-8.73141	16.5735
92	-5.44849	-11.1591	0	-5.44849	-11.1591		99	-7.34763	16.5984	0	-7.34763	16.5984
93	-5.54654	-11.0193	0	-5.54654	-11.0193		100	-6.77185	16.6559	0	-6.77185	16.6559
94	-6.25281	-11.5931	0	-6.25281	-11.5931		101	-5.60806	16.9483	0	-5.60806	16.9483
95	-6.69986	-12.2384	0	-6.69986	-12.2384		102	-4.44162	17.634	0	-4.44162	17.634
96	-7.10803	-12.8924	0	-7.10803	-12.8924		103	-3.73166	18.3882	0	-3.73166	18.3882
97	-8.15439	-13.2701	0	-8.15439	-13.2701		104	-5.24332	19.5504	0	-5.24332	19.5504
98	-8.75311	-14.2966	0	-8.75311	-14.2966		105	-2.81366	18.1566	0	-2.81366	18.1566
99	-8.55276	-14.6915	0	-8.55276	-14.6915		106	-3.39539	20.096	0	-3.39539	20.096
100	-7.9335	-14.1273	0	-7.9335	-14.1273		107	-2.48737	21.0305	0	-2.48737	21.0305
101	-7.80423	-13.5544	0	-7.80423	-13.5544		108	-1.90195	21.3411	0	-1.90195	21.3411
102	-7.65808	-13.3926	0	-7.65808	-13.3926		109	-1.03903	22.0812	0	-1.03903	22.0812
103	-7.81161	-13.6299	0	-7.81161	-13.6299		110	-0.128845	23.6616	0	-0.128845	23.6616
104	-7.76913	-13.6345	0	-7.76913	-13.6345		111	0.489868	24.9193	0	0.489868	24.9193
105	-6.74088	-12.3003	0	-6.74088	-12.3003		112	0.722046	25.2939	0	0.722046	25.2939
106	-6.59494	-11.6125	0	-6.59494	-11.6125		113	1.47076	25.972	0	1.47076	25.972
107	-4.91229	-10.5271	0	-4.91229	-10.5271		114	1.93793	25.9649	0	1.93793	25.9649
108	-4.1575	-7.16803	0	-4.1575	-7.16803		115	2.0332	26.2415	0	2.0332	26.2415
109	-2.46402	-5.68518	0	-2.46402	-5.68518		116	2.5697	25.9492	0	2.5697	25.9492
110	-0.716583	-2.54572	0	-0.716583	-2.54572		117	2.05188	27.1821	0	2.05188	27.1821
111	2.68103	4.40143	0	2.68103	4.40143		118	1.96033	27.5822	0	1.96033	27.5822
112	1.24365	4.22809	0	1.24365	4.22809		119	3.99835	26.1022	0	3.99835	26.1022
113	0.826996	2.59589	0	0.826996	2.59589		120	1.21405	28.275	0	1.21405	28.275
114	0.27655	1.55115	0	0.27655	1.55115		121	0.411804	28.291	0	0.411804	28.291
115	0.188324	2.99243	0	0.188324	2.99243		122	-0.638489	28.8206	0	-0.638489	28.8206
116	0.0646973	2.73981	0	0.0646973	2.73981		123	-0.780151	28.1812	0	-0.780151	28.1812
117	-0.485748	3.38202	0	-0.485748	3.38202		124	-2.07001	28.2161	0	-2.07001	28.2161
118	-0.122437	5.16522	0	-0.122437	5.16522		125	-2.15961	28.7989	0	-2.15961	28.7989
119	-0.228729	3.5636	0	-0.228729	3.5636		126	-1.83243	29.1819	0	-1.83243	29.1819
120	-1.85074	3.50348	0	-1.85074	3.50348		127	-1.97226	30.5336	0	-1.97226	30.5336
121	-2.99869	4.06567	0	-2.99869	4.06567		128	-2.46829	31.7259	0	-2.46829	31.7259
122	-3.21808	4.05695	0	-3.21808	4.05695		129	-3.20352	32.3269	0	-3.20352	32.3269
123	-5.67407	3.81708	0	-5.67407	3.81708		130	-3.16391	33.1589	0	-3.16391	33.1589
124	-6.35968	4.25024	0	-6.35968	4.25024		131	-2.5441	33.7339	0	-2.5441	33.7339
125	-4.87854	3.33203	0	-4.87854	3.33203		132	-0.959961	35.1107	0	-0.959961	35.1107
126	-4.99905	3.6499	0	-4.99905	3.6499		133	-1.15356	36.3505	0	-1.15356	36.3505
127	-3.79382	2.74512	0	-3.79382	2.74512		134	-2.7034	37.934	0	-2.7034	37.934
128	-3.47974	2.97754	0	-3.47974	2.97754		135	-4.13181	37.9989	0	-4.13181	37.9989
129	-3.16635	3.78406	0	-3.16635	3.78406		136	-4.51016	38.8538	0	-4.51016	38.8538
130	-3.66537	4.35883	0	-3.66537	4.35883		137	-4.36029	40.092	0	-4.36029	40.092
131	-6.27338	10.8458	0	-6.27338	10.8458		143	-3.91983	37.1915	0	-3.91983	37.1915
132	-4.76077	9.4292	0	-4.76077	9.4292		144	-7.87216	39.0098	0	-7.87216	39.0098
133	-3.05743	9.13904	0	-3.05743	9.13904		1	0	0	0	0	0
134	-7.78683	9.0155	0	-7.78683	9.0155		2	0.299133	0.215271	0	0.299133	0.215271
135	-7.00763	8.56226	0	-7.00763	8.56226		3	-0.0362244	-0.322571	0	-0.0362244	-0.322571
136	-6.84012	9.35138	0	-6.84012	9.35138		4	0.350586	-0.776428	0	0.350586	-0.776428
1	0	0	0	0	0		5	0.311066	-0.464905	0	0.311066	-0.464905
2	-0.0956421	0.162445	0	-0.0956421	0.162445		6	0.295044	-0.250549	0	0.295044	-0.250549
3	0.0255737	0.358337	0	0.0255737	0.358337		7	0.582611	-0.149963	0	0.582611	-0.149963
4	-0.0102539	0.389435	0	-0.0102539	0.389435		8	0.670654	-0.796875	0	0.670654	-0.796875
5	0.544495	-0.348755	0	0.544495	-0.348755		9	-0.0259094	-1.33344	0	-0.0259094	-1.33344
6	0.356201	0.165009	0	0.356201	0.165009		10	0.0345459	-1.32935	0	0.0345459	-1.32935
7	0.203613	0.0288086	0	0.203613	0.0288086		11	0.350128	-0.390137	0	0.350128	-0.390137
8	0.398987	0.163757	0	0.398987	0.163757		12	0.0693665	-1.26886	0	0.0693665	-1.26886
9	0.165161	0.156372	0	0.165161	0.156372		13	1.11826	-0.868042	0	1.11826	-0.868042
10	0.0418701	0.242645	0	0.0418701	0.242645		14	1.6041	-1.07587	0	1.6041	-1.07587
11	-0.608948	0.654877	0	-0.608948	0.654877		15	1.56265	-1.43164	0	1.56265	-1.43164
12	-0.864319	0.300537	0	-0.864319	0.300537		16	1.45145	-1.7074	0	1.45145	-1.7074
13	-0.426392	0.814087	0	-0.426392	0.814087		17	1.84625	-1.96259	0	1.84625	-1.96259
14	-0.160889	0.849884	0	-0.160889	0.849884		18	1.87708	-2.21643	0	1.87708	-2.21643
15	-0.876587	0.332794	0	-0.876587	0.332794		19	1.73315	-2.16412	0	1.73315	-2.16412
16	-1.03198	0.959595	0	-1.03198	0.959595		20	1.74417	-1.97363	0	1.74417	-1.97363
17	-0.611145	1.80637	0	-0.611145	1.80637		21	2.1976	-2.26843	0	2.1976	-2.26843
18	-0.759583	1.76257	0	-0.759583	1.76257		22	1.93112	-1.98743	0	1.93112	-1.98743
19	-0.825928	2.53687	0	-0.825928	2.53687		23	2.07227	-2.87952	0	2.07227	-2.87952
20	-0.619812	2.88269	0	-0.619812	2.88269		24	2.34134	-3.37598	0	2.34134	-3.37598
21	-0.731506	2.84991	0	-0.731506	2.84991		25	2.49609	-3.02081	0	2.49609	-3.02081
22	-0.79364	2.70303	0	-0.79364	2.70303		26	2.83606	-3.05664	0	2.83606	-3.05664
23	-0.159546	3.49103	0	-0.159546	3.49103		27	3.05762	-3.14288	0	3.05762	-3.14288
24	0.0932617	2.71207	0	0.0932617	2.71207		28	3.26102	-2.50952	0	3.26102	-2.50952
25	-0.423645	3.10498	0	-0.423645	3.10498		29	3.78751	-2.32977	0	3.78751	-2.32977
26	-0.667542	3.29324	0	-0.667542	3.29324		30	4.52954	-1.55652	0	4.52954	-1.55652
27	-0.64917	3.23148	0	-0.64917	3.23148		31	4.47675	-1.58307	0	4.47675	-1.58307
28	-0.388855	2.89713	0	-0.388855	2.89713		32	4.86615	-1.44708	0	4.86615	-1.44708
29	-0.416748	3.18677	0	-0.416748	3.18677		33	4.71414	-1.36694	0	4.71414	-1.36694
30	-0.367126	3.09286	0	-0.367126	3.09286		34	4.42899	-0.541382	0	4.42899	-0.541382
31	0.0827637	3.99951	0	0.0827637	3.99951		35	3.97833	-0.759644	0	3.97833	-0.759644
32	-0.423706	3.17099	0	-0.423706	3.17099		36	3.66907	-0.993042	0	3.66907	-0.993042
33	-0.190674	4.22009	0	-0.190674	4.22009		37	4.07806	-0.253052	0	4.07806	-0.253052
34	0.0614624	3.94327	0	0.0614624	3.94327		38	4.608	0.439392	0	4.608	0.439392
35	-0.0198364	3.92737	0	-0.0198364	3.92737		39	4.34711	1.57666	0	4.34711	1.57666
36	0.211426	3.58133	0	0.211426	3.58133		40	4.7937	1.13544	0	4.7937	1.13544
37	0.209595	4.34641	0	0.209595	4.34641		41	4.03247	1.66284	0	4.03247	1.66284
38	0.452698	2.99088	0	0.452698	2.99088		42	4.59433	0.844116	0	4.59433	0.844116
39	-0.0125122	3.24625	0	-0.0125122	3.24625		43	4.57861	2.4613	0	4.57861	2.4613
40	0.204163	3.12305	0	0.204163	3.12305		44	5.13196	1.48657	0	5.13196	1.48657
41	0.0496826	3.43839	0	0.0496826	3.43839		45	4.21463	3.44879	0	4.21463	3.44879
42	0.026062	3.11249	0	0.026062	3.11249		46	4.03427	3.99622	0	4.03427	3.99622
43	0.109375	2.59674	0	0.109375	2.59674		47	1.18771	8.33539	0	1.18771	8.33539
44	-0.382812	2.92526	0	-0.382812	2.92526		48	1.66748	8.32733	0	1.66748	8.32733
45	-0.286133	3.61417	0	-0.286133	3.61417		49	1.9646	8.10645	0	1.9646	8.10645
46	-0.0194702	4.64682	0	-0.0194702	4.64682		50	1.74533	8.01495	0	1.74533	8.01495
47	0.486084	3.73111	0	0.486084	3.73111		51	2.72571	6.82086	0	2.72571	6.82086
48	0.108032	3.8287	0	0.108032	3.8287		52	2.91306	7.30353	0	2.91306	7.30353
49	-0.0666504	3.48587	0	-0.0666504	3.48587		53	2.84668	6.80206	0	2.84668	6.80206
50	0.0205078	4.12387	0	0.0205078	4.12387		54	3.0611	7.34485	0	3.0611	7.34485
51	-0.393555	2.97263	0	-0.393555	2.97263		55	3.89536	7.77026	0	3.89536	7.77026
52	-0.000793457	3.21091	0	-0.000793457	3.21091		56	3.70721	7.28009	0	3.70721	7.28009
53	-0.145508	3.2619	0	-0.145508	3.2619		57	3.82251	7.0556	0	3.82251	7.0556
54	-0.138855	3.92426	0	-0.138855	3.92426		58	3.89972	5.94513	0	3.89972	5.94513
55	0.118347	3.64337	0	0.118347	3.64337		59	4.22638	7.3913	0	4.22638	7.3913
56	0.359314	3.29892	0	0.359314	3.29892		60	5.36725	1.11102	0	5.36725	1.11102
57	0.227905	2.70483	0	0.227905	2.70483		61	5.33438	2.46851	0	5.33438	2.46851
58	0.265564	2.3335	0	0.265564	2.3335		62	4.43729	5.62994	0	4.43729	5.62994
59	0.422913	2.50763	0	0.422913	2.50763		63	5.24789	6.58881	0	5.24789	6.58881
60	0.737976	3.07547	0	0.737976	3.07547		64	5.52893	6.17865	0	5.52893	6.17865
61	0.208679	2.31143	0	0.208679	2.31143		65	5.83505	7.62366	0	5.83505	7.62366
62	0.188782	2.3501	0	0.188782	2.3501		66	4.36737	6.23291	0	4.36737	6.23291
63	0.520874	2.45074	0	0.520874	2.45074		67	3.86606	6.28851	0	3.86606	6.28851
64	0.757385	2.41415	0	0.757385	2.41415		68	4.81186	7.42694	0	4.81186	7.42694
65	0.411804	2.4223	0	0.411804	2.4223		69	5.31149	9.12109	0	5.31149	9.12109
66	0.371704	2.56781	0	0.371704	2.56781		70	4.97418	6.43817	0	4.97418	6.43817
67	0.505798	2.31845	0	0.505798	2.31845		71	5.01495	6.58093	0	5.01495	6.58093
68	0.221741	1.39841	0	0.221741	1.39841		72	4.85205	6.93109	0	4.85205	6.93109
69	0.515503	1.70676	0	0.515503	1.70676		73	5.37753	7.03015	0	5.37753	7.03015
70	-0.0196533	1.77512	0	-0.0196533	1.77512		74	6.54248	9.7771	0	6.54248	9.7771
71	-0.0269165	2.17383	0	-0.0269165	2.17383		75	6.40674	11.8666	0	6.40674	11.8666
72	-0.074585	1.30753	0	-0.074585	1.30753		76	4.50516	7.70197	0	4.50516	7.70197
73	-0.00335693	0.870514	0	-0.00335693	0.870514		77	6.0062	6.07245	0	6.0062	6.07245
74	-0.0882568	1.17502	0	-0.0882568	1.17502		78	5.75232	6.18317	0	5.75232	6.18317
75	-0.113159	0.97934	0	-0.113159	0.97934		79	5.53293	7.76501	0	5.53293	7.76501
76	0.130859	0.496002	0	0.130859	0.496002		80	3.8989	8.7735	0	3.8989	8.7735
77	-0.29187	0.297668	0	-0.29187	0.297668		81	5.23853	14.3536	0	5.23853	14.3536
78	-0.0324707	0.654907	0	-0.0324707	0.654907		82	5.2814	14.6634	0	5.2814	14.6634
79	0.204956	0.717438	0	0.204956	0.717438		83	5.34268	14.8572	0	5.34268	14.8572
80	-0.0812988	0.712708	0	-0.0812988	0.712708		84	3.70053	10.0488	0	3.70053	10.0488
81	0.142883	1.35272	0	0.142883	1.35272		85	4.77838	13.8512	0	4.77838	13.8512
82	-0.519653	0.97464	0	-0.519653	0.97464		86	3.34094	9.68213	0	3.34094	9.68213
83	-0.310364	1.07425	0	-0.310364	1.07425		87	3.40558	9.77032	0	3.40558	9.77032
84	-0.301575	0.621826	0	-0.301575	0.621826		88	3.1741	9.39227	0	3.1741	9.39227
85	-0.15094	1.07806	0	-0.15094	1.07806		89	5.4845	13.9286	0	5.4845	13.9286
86	-0.141357	1.1329	0	-0.141357	1.1329		90	4.84018	13.3506	0	4.84018	13.3506
87	-0.645325	1.65536	0	-0.645325	1.65536		91	4.85648	13.5292	0	4.85648	13.5292
88	-0.495789	2.04715	0	-0.495789	2.04715		92	4.83466	13.1394	0	4.83466	13.1394
89	-0.20813	1.62595	0	-0.20813	1.62595		93	4.21979	14.5022	0	4.21979	14.5022
90	-0.291687	1.79602	0	-0.291687	1.79602		94	5.92871	13.7825	0	5.92871	13.7825
91	0.312378	2.95456	0	0.312378	2.95456		95	6.91342	15.8438	0	6.91342	15.8438
92	0.027771	3.07852	0	0.027771	3.07852		96	7.65338	15.1065	0	7.65338	15.1065
93	0.0690918	2.38644	0	0.0690918	2.38644		97	6.36517	11.9743	0	6.36517	11.9743
94	-0.418335	1.30948	0	-0.418335	1.30948		98	6.12445	12.7844	0	6.12445	12.7844
95	-0.545166	2.92715	0	-0.545166	2.92715		99	6.07297	13.8993	0	6.07297	13.8993
96	-0.170349	2.2377	0	-0.170349	2.2377		100	6.45349	13.8445	0	6.45349	13.8445
97	-0.170349	2.17307	0	-0.170349	2.17307		101	6.44492	13.8997	0	6.44492	13.8997
98	-0.580017	3.71292	0	-0.580017	3.71292		102	6.97861	13.8901	0	6.97861	13.8901
99	-1.02173	3.49622	0	-1.02173	3.49622		103	7.78784	14.9962	0	7.78784	14.9962
100	-0.421326	1.90491	0	-0.421326	1.90491		104	7.23053	19.7776	0	7.23053	19.7776
101	-0.638489	4.20462	0	-0.638489	4.20462		105	7.1608	19.5366	0	7.1608	19.5366
102	-0.338745	2.83151	0	-0.338745	2.83151		106	6.90762	15.2314	0	6.90762	15.2314
103	-0.142029	2.90433	0	-0.142029	2.90433		107	7.43927	15.6207	0	7.43927	15.6207
104	-0.17804	2.89719	0	-0.17804	2.89719		108	7.00449	15.0485	0	7.00449	15.0485
105	-0.498108	1.63107	0	-0.498108	1.63107		109	6.28217	20.151	0	6.28217	20.151
106	-0.366882	3.01355	0	-0.366882	3.01355		110	5.98624	20.6629	0	5.98624	20.6629
107	-0.370056	2.04605	0	-0.370056	2.04605		111	5.85776	14.7408	0	5.85776	14.7408
108	-0.176697	1.80441	0	-0.176697	1.80441		112	4.0191	18.2869	0	4.0191	18.2869
109	-0.274292	2.41574	0	-0.274292	2.41574		113	4.10266	15.6774	0	4.10266	15.6774
110	-0.492737	2.60815	0	-0.492737	2.60815		114	1.86755	19.0865	0	1.86755	19.0865
111	-0.492676	2.1698	0	-0.492676	2.1698		115	1.89346	15.1174	0	1.89346	15.1174
112	-0.499146	2.29419	0	-0.499146	2.29419		116	-0.590576	18.7063	0	-0.590576	18.7063
113	-0.429199	1.4715	0	-0.429199	1.4715		117	0.198975	16.3032	0	0.198975	16.3032
114	-0.396729	1.59308	0	-0.396729	1.59308		118	0.352722	16.9926	0	0.352722	16.9926
115	-0.662598	3.52045	0	-0.662598	3.52045		119	-1.50739	20.532	0	-1.50739	20.532
116	0.385803	2.16568	0	0.385803	2.16568		120	-0.818451	19.2258	0	-0.818451	19.2258
117	-0.255676	2.80106	0	-0.255676	2.80106		121	-0.468506	18.56	0	-0.468506	18.56
118	-0.354736	2.61179	0	-0.354736	2.61179		122	-2.38272	18.9243	0	-2.38272	18.9243
119	-0.381287	2.41721	0	-0.381287	2.41721		123	-4.46448	17.3555	0	-4.46448	17.3555
120	-0.192749	1.4433	0	-0.192749	1.4433		124	-3.3598	16.5864	0	-3.3598	16.5864
121	-0.291077	1.59229	0	-0.291077	1.59229		125	-1.18265	14.301	0	-1.18265	14.301
122	-0.4729	1.28616	0	-0.4729	1.28616		126	1.88553	13.7079	0	1.88553	13.7079
123	-0.379761	1.42102	0	-0.379761	1.42102		127	6.85199	11.213	0	6.85199	11.213
124	-0.293945	1.54324	0	-0.293945	1.54324		128	9.04779	10.0173	0	9.04779	10.0173
125	-0.373596	1.82339	0	-0.373596	1.82339		129	9.8689	6.81799	0	9.8689	6.81799
126	-0.408447	0.963409	0	-0.408447	0.963409		130	12.2557	2.31073	0	12.2557	2.31073
127	-0.371582	1.57101	0	-0.371582	1.57101		131	12.3662	-0.692383	0	12.3662	-0.692383
128	-0.441711	1.25287	0	-0.441711	1.25287		132	12.9099	-2.95837	0	12.9099	-2.95837
129	-0.83075	1.3028	0	-0.83075	1.3028		133	11.9313	-4.37445	0	11.9313	-4.37445
130	-0.606323	0.817383	0	-0.606323	0.817383		134	11.077	-5.97412	0	11.077	-5.97412
131	-0.532654	1.33279	0	-0.532654	1.33279		135	10.7328	-6.66528	0	10.7328	-6.66528
132	-0.747986	0.763275	0	-0.747986	0.763275		136	11.157	-6.28094	0	11.157	-6.28094
133	-0.345215	1.0412	0	-0.345215	1.0412		137	13.2763	-5.06378	0	13.2763	-5.06378
134	-0.45929	0.693848	0	-0.45929	0.693848		138	16.8542	-3.25201	0	16.8542	-3.25201
135	-0.615051	0.644684	0	-0.615051	0.644684		139	17.0555	-2.22479	0	17.0555	-2.22479
136	-0.536133	1.22049	0	-0.536133	1.22049		140	18.3557	-1.39722	0	18.3557	-1.39722
1	0	0	0	0	0		141	17.1571	-1.15948	0	17.1571	-1.15948
2	0.265991	-0.415863	0	0.265991	-0.415863		142	15.6195	-2.04358	0	15.6195	-2.04358
3	0.636719	0.15799	0	0.636719	0.15799		143	14.7186	-0.351013	0	14.7186	-0.351013
4	0.586578	0.0144348	0	0.586578	0.0144348		144	11.7756	1.35303	0	11.7756	1.35303
5	0.849091	-0.247192	0	0.849091	-0.247192		145	9.99081	1.24628	0	9.99081	1.24628
6	1.70621	-0.0422974	0	1.70621	-0.0422974		1	0	0	0	0	0
7	-0.163452	-0.112366	0	-0.163452	-0.112366		2	-0.323608	0.209625	0	-0.323608	0.209625
8	1.33124	-0.303284	0	1.33124	-0.303284		3	0.306671	-0.64151	0	0.306671	-0.64151
9	0.320648	0.730255	0	0.320648	0.730255		4	-0.412506	-0.105896	0	-0.412506	-0.105896
10	0.909576	-0.0865784	0	0.909576	-0.0865784		5	-0.358337	-0.676941	0	-0.358337	-0.676941
11	-0.325897	-0.40509	0	-0.325897	-0.40509		6	-0.29541	-0.361023	0	-0.29541	-0.361023
19	0.391632	1.40561	0	0.391632	1.40561		7	-0.370453	-0.0191345	0	-0.370453	-0.0191345
20	-0.129608	1.40369	0	-0.129608	1.40369		8	-0.278778	-0.273865	0	-0.278778	-0.273865
22	-0.187103	2.24945	0	-0.187103	2.24945		9	-0.162415	-0.812744	0	-0.162415	-0.812744
23	-0.0456238	2.10654	0	-0.0456238	2.10654		10	-0.940155	0.284821	0	-0.940155	0.284821
24	-0.281647	2.45389	0	-0.281647	2.45389		11	-1.08972	-0.1539	0	-1.08972	-0.1539
26	0.162994	1.95584	0	0.162994	1.95584		12	-1.77606	-1.25201	0	-1.77606	-1.25201
28	0.104004	1.96112	0	0.104004	1.96112		13	-3.30481	0.87381	0	-3.30481	0.87381
29	0.115997	2.1832	0	0.115997	2.1832		14	-3.63657	1.35339	0	-3.63657	1.35339
30	0.919647	1.90802	0	0.919647	1.90802		15	-3.25391	1.29861	0	-3.25391	1.29861
31	0.620544	2.36307	0	0.620544	2.36307		16	-3.22852	1.33557	0	-3.22852	1.33557
32	3.3244	-0.490906	0	3.3244	-0.490906		17	-3.33176	1.10266	0	-3.33176	1.10266
33	3.61237	-0.0669861	0	3.61237	-0.0669861		18	-3.90967	2.17062	0	-3.90967	2.17062
34	4.11447	0.923157	0	4.11447	0.923157		19	-4.45398	3.05716	0	-4.45398	3.05716
35	4.24481	-0.293823	0	4.24481	-0.293823		20	-4.91339	3.57217	0	-4.91339	3.57217
36	4.86179	-0.80484	0	4.86179	-0.80484		21	-4.85785	3.24921	0	-4.85785	3.24921
37	4.8277	-0.503998	0	4.8277	-0.503998		22	-4.45398	2.62955	0	-4.45398	2.62955
38	5.17386	-0.926331	0	5.17386	-0.926331		23	-4.62781	2.42114	0	-4.62781	2.42114
39	4.60284	0.435608	0	4.60284	0.435608		24	-5.21344	3.31226	0	-5.21344	3.31226
40	0.45462	3.84488	0	0.45462	3.84488		25	-5.65607	4.1619	0	-5.65607	4.1619
41	0.371277	3.66049	0	0.371277	3.66049		26	-5.26215	3.98196	0	-5.26215	3.98196
42	-0.0147095	3.78366	0	-0.0147095	3.78366		27	-4.79407	3.57288	0	-4.79407	3.57288
43	-0.193329	4.37076	0	-0.193329	4.37076		28	-5.02322	3.30688	0	-5.02322	3.30688
44	-0.094574	4.43225	0	-0.094574	4.43225		29	-5.5452	4.79617	0	-5.5452	4.79617
45	0.0924377	4.05573	0	0.0924377	4.05573		30	-4.83533	4.30438	0	-4.83533	4.30438
46	-0.908691	4.34827	0	-0.908691	4.34827		31	-5.23969	4.98953	0	-5.23969	4.98953
47	-0.807037	4.76764	0	-0.807037	4.76764		32	-5.33722	5.00891	0	-5.33722	5.00891
48	-0.228729	3.98621	0	-0.228729	3.98621		33	-4.81097	5.12085	0	-4.81097	5.12085
49	-1.46082	4.94162	0	-1.46082	4.94162		34	-3.92105	5.48004	0	-3.92105	5.48004
50	3.82919	2.90173	0	3.82919	2.90173		35	-3.74182	4.77335	0	-3.74182	4.77335
51	-1.57938	5.28925	0	-1.57938	5.28925		36	-3.52487	4.7327	0	-3.52487	4.7327
52	4.13275	3.00833	0	4.13275	3.00833		37	-3.99374	4.13998	0	-3.99374	4.13998
53	-1.2598	5.64331	0	-1.2598	5.64331		38	-4.3476	3.44553	0	-4.3476	3.44553
54	-2.49213	5.84595	0	-2.49213	5.84595		39	-3.31039	3.93143	0	-3.31039	3.93143
55	-1.19394	6.05078	0	-1.19394	6.05078		40	-2.93802	3.64139	0	-2.93802	3.64139
56	-1.40808	6.21457	0	-1.40808	6.21457		41	-1.93869	4.00583	0	-1.93869	4.00583
57	-1.72702	6.29633	0	-1.72702	6.29633		42	-1.90741	3.38687	0	-1.90741	3.38687
58	-2.05835	6.64264	0	-2.05835	6.64264		43	-1.77191	2.58047	0	-1.77191	2.58047
59	-2.46713	6.68835	0	-2.46713	6.68835		44	-1.42612	2.75955	0	-1.42612	2.75955
60	-1.14795	6.68442	0	-1.14795	6.68442		45	-1.40356	2.79681	0	-1.40356	2.79681
61	-1.98145	7.24094	0	-1.98145	7.24094		46	-2.42587	2.27228	0	-2.42587	2.27228
62	-2.2131	7.56909	0	-2.2131	7.56909		47	-1.98898	2.11069	0	-1.98898	2.11069
63	-2.04114	7.45096	0	-2.04114	7.45096		48	-1.70862	2.03302	0	-1.70862	2.03302
64	-2.2933	7.78448	0	-2.2933	7.78448		49	-1.74759	1.70306	0	-1.74759	1.70306
65	-2.14661	7.72141	0	-2.14661	7.72141		50	-0.841949	2.53107	0	-0.841949	2.53107
66	-2.63495	7.94385	0	-2.63495	7.94385		51	-0.373688	2.08444	0	-0.373688	2.08444
67	-2.56284	8.06982	0	-2.56284	8.06982		52	0.330902	2.24527	0	0.330902	2.24527
68	-3.03708	8.39142	0	-3.03708	8.39142		53	1.01343	3.01807	0	1.01343	3.01807
69	-3.90393	8.62228	0	-3.90393	8.62228		54	0.657837	3.50333	0	0.657837	3.50333
70	-2.71146	8.46753	0	-2.71146	8.46753		55	0.0779114	3.23227	0	0.0779114	3.23227
71	-3.3385	8.01187	0	-3.3385	8.01187		56	-0.0154114	2.46594	0	-0.0154114	2.46594
72	-3.94897	8.56531	0	-3.94897	8.56531		57	-2.07538	1.09064	0	-2.07538	1.09064
73	-3.00159	8.34424	0	-3.00159	8.34424		58	-0.909454	2.60297	0	-0.909454	2.60297
74	-4.31076	8.61917	0	-4.31076	8.61917		59	-0.800049	2.27188	0	-0.800049	2.27188
75	-3.34152	8.35599	0	-3.34152	8.35599		60	-0.745789	2.3732	0	-0.745789	2.3732
76	-3.58734	8.336	0	-3.58734	8.336		61	-1.07669	1.82089	0	-1.07669	1.82089
77	-3.79401	8.1553	0	-3.79401	8.1553		62	-1.6376	2.32153	0	-1.6376	2.32153
78	-4.65976	8.55817	0	-4.65976	8.55817		63	-1.75195	2.95627	0	-1.75195	2.95627
79	-4.83768	8.49307	0	-4.83768	8.49307		64	-1.63858	2.40747	0	-1.63858	2.40747
80	-4.72238	8.42313	0	-4.72238	8.42313		65	-1.03708	2.3186	0	-1.03708	2.3186
81	-3.95981	7.69412	0	-3.95981	7.69412		66	-0.767944	2.8501	0	-0.767944	2.8501
82	-4.81821	7.80701	0	-4.81821	7.80701		67	-1.34204	2.59836	0	-1.34204	2.59836
83	-4.38055	7.6557	0	-4.38055	7.6557		68	-0.143707	3.19705	0	-0.143707	3.19705
84	-4.27298	7.73303	0	-4.27298	7.73303		69	0.0865479	2.72015	0	0.0865479	2.72015
85	-4.73999	8.00845	0	-4.73999	8.00845		70	0.198242	3.11124	0	0.198242	3.11124
86	-3.48718	7.77335	0	-3.48718	7.77335		71	0.281372	3.50391	0	0.281372	3.50391
87	-4.11032	8.04004	0	-4.11032	8.04004		72	-0.155212	3.42996	0	-0.155212	3.42996
88	-5.0531	8.10895	0	-5.0531	8.10895		73	-0.0629578	3.96481	0	-0.0629578	3.96481
89	-5.23309	8.21875	0	-5.23309	8.21875		74	0.276489	2.93219	0	0.276489	2.93219
90	-4.0528	8.20728	0	-4.0528	8.20728		75	0.716125	2.5687	0	0.716125	2.5687
91	-4.82208	7.98392	0	-4.82208	7.98392		76	0.649384	3.01825	0	0.649384	3.01825
92	-4.43082	8.28174	0	-4.43082	8.28174		77	0.273438	3.60574	0	0.273438	3.60574
93	-3.77106	8.30783	0	-3.77106	8.30783		78	-0.0520935	3.6748	0	-0.0520935	3.6748
94	-3.28299	8.03799	0	-3.28299	8.03799		79	-0.180328	2.71335	0	-0.180328	2.71335
95	-3.65491	8.52914	0	-3.65491	8.52914		80	0.0870056	2.50974	0	0.0870056	2.50974
96	-3.58459	9.10983	0	-3.58459	9.10983		81	0.234009	1.78732	0	0.234009	1.78732
97	-4.25555	9.33597	0	-4.25555	9.33597		82	-0.0758362	1.60876	0	-0.0758362	1.60876
98	-4.10471	9.60712	0	-4.10471	9.60712		83	-1.00439	1.69049	0	-1.00439	1.69049
99	-4.36798	10.2901	0	-4.36798	10.2901		84	-1.06885	1.31171	0	-1.06885	1.31171
100	-4.27539	10.1992	0	-4.27539	10.1992		85	-0.787994	1.25101	0	-0.787994	1.25101
101	-4.37708	10.2378	0	-4.37708	10.2378		86	-0.604523	0.804138	0	-0.604523	0.804138
102	-4.65454	10.5764	0	-4.65454	10.5764		87	-0.998352	0.822357	0	-0.998352	0.822357
103	-4.3143	9.57358	0	-4.3143	9.57358		88	-0.881378	1.06598	0	-0.881378	1.06598
104	-4.24542	9.63876	0	-4.24542	9.63876		89	-1.07629	0.837891	0	-1.07629	0.837891
105	-4.88855	9.75089	0	-4.88855	9.75089		90	-1.16089	1.1785	0	-1.16089	1.1785
106	-3.77036	9.29471	0	-3.77036	9.29471		91	-1.42667	1.50717	0	-1.42667	1.50717
107	-3.59317	9.50537	0	-3.59317	9.50537		92	-0.157318	1.78732	0	-0.157318	1.78732
108	-4.70343	10.2886	0	-4.70343	10.2886		93	-0.327087	1.31464	0	-0.327087	1.31464
109	-2.18967	9.55423	0	-2.18967	9.55423		94	-0.0882568	0.567383	0	-0.0882568	0.567383
110	-2.52737	9.51086	0	-2.52737	9.51086		95	0.952148	0.472687	0	0.952148	0.472687
111	-3.11276	9.75946	0	-3.11276	9.75946		96	-0.153778	0.27655	0	-0.153778	0.27655
112	-3.55649	9.64789	0	-3.55649	9.64789		97	-1.08481	0.156464	0	-1.08481	0.156464
113	-3.97726	9.88403	0	-3.97726	9.88403		98	-0.780457	0.518433	0	-0.780457	0.518433
114	-2.38278	9.21069	0	-2.38278	9.21069		99	-0.55188	-0.316254	0	-0.55188	-0.316254
115	-3.00339	9.5386	0	-3.00339	9.5386		100	-1.86722	0.527924	0	-1.86722	0.527924
116	-2.44186	9.65039	0	-2.44186	9.65039		101	-0.993286	0.567383	0	-0.993286	0.567383
117	-2.28256	9.33487	0	-2.28256	9.33487		102	-0.941589	-0.918121	0	-0.941589	-0.918121
118	-2.88596	9.97452	0	-2.88596	9.97452		103	-0.81073	-2.01544	0	-0.81073	-2.01544
119	-3.35596	9.81259	0	-3.35596	9.81259		104	-0.397888	-0.954224	0	-0.397888	-0.954224
120	-2.50607	9.46832	0	-2.50607	9.46832		105	-4.59152	-2.78833	0	-4.59152	-2.78833
121	-2.64877	10.05	0	-2.64877	10.05		106	-7.66748	-4.02979	0	-7.66748	-4.02979
122	-2.58578	10.2326	0	-2.58578	10.2326		107	-12.2729	-1.74203	0	-12.2729	-1.74203
123	-3.29297	10.5906	0	-3.29297	10.5906		108	-9.93225	-5.14938	0	-9.93225	-5.14938
124	-3.80557	11.0601	0	-3.80557	11.0601		109	-11.7602	-5.54831	0	-11.7602	-5.54831
125	-3.40909	11.4448	0	-3.40909	11.4448		112	-14.5962	1.33307	0	-14.5962	1.33307
126	-4.67648	12.1865	0	-4.67648	12.1865		113	-15.1835	1.29553	0	-15.1835	1.29553
127	-3.19339	12.7684	0	-3.19339	12.7684		114	-10.8551	-1.3826	0	-10.8551	-1.3826
128	-4.32654	12.8131	0	-4.32654	12.8131		115	-11.4201	-1.15363	0	-11.4201	-1.15363
129	-4.52359	13.9695	0	-4.52359	13.9695		116	-11.7828	-0.941101	0	-11.7828	-0.941101
130	-5.63986	14.0485	0	-5.63986	14.0485		117	-12.5285	-2.46588	0	-12.5285	-2.46588
131	-4.28976	14.3607	0	-4.28976	14.3607		118	-12.514	-1.82724	0	-12.514	-1.82724
132	-4.54367	14.6547	0	-4.54367	14.6547		119	-13.7396	-2.47021	0	-13.7396	-2.47021
133	-4.82428	14.4474	0	-4.82428	14.4474		120	-14.6128	-1.92032	0	-14.6128	-1.92032
134	-4.40005	15.1661	0	-4.40005	15.1661		121	-13.9533	-5.41516	0	-13.9533	-5.41516
135	-1.68964	16.2738	0	-1.68964	16.2738		122	-14.3957	-6.87338	0	-14.3957	-6.87338
136	-3.90384	15.1132	0	-3.90384	15.1132		123	-15.6133	-4.27335	0	-15.6133	-4.27335
1	0	0	0	0	0		124	-14.7009	-4.70117	0	-14.7009	-4.70117
2	-0.0784912	-0.129868	0	-0.0784912	-0.129868		125	-15.4835	-6.27237	0	-15.4835	-6.27237
3	-0.0548706	-0.834167	0	-0.0548706	-0.834167		126	-15.5527	-8.91721	0	-15.5527	-8.91721
4	-0.0519409	-0.832397	0	-0.0519409	-0.832397		127	-16.2687	-9.4397	0	-16.2687	-9.4397
5	0.356079	-0.850967	0	0.356079	-0.850967		128	-17.2847	-9.23178	0	-17.2847	-9.23178
6	0.553955	-1.00795	0	0.553955	-1.00795		129	-18.2883	-8.34851	0	-18.2883	-8.34851
7	0.778076	-0.740372	0	0.778076	-0.740372		130	-19.0242	-5.56558	0	-19.0242	-5.56558
8	0.929932	-0.753052	0	0.929932	-0.753052		131	-19.7359	-1.68665	0	-19.7359	-1.68665
9	1.19757	-1.26929	0	1.19757	-1.26929		132	-19.8206	-0.83551	0	-19.8206	-0.83551
10	0.672913	-0.618393	0	0.672913	-0.618393		133	-19.1025	-0.382416	0	-19.1025	-0.382416
11	0.191528	-0.451538	0	0.191528	-0.451538		134	-20.7059	-0.78418	0	-20.7059	-0.78418
12	-0.622559	0.179596	0	-0.622559	0.179596		135	-20.0588	-0.189636	0	-20.0588	-0.189636
13	-0.810303	0.992966	0	-0.810303	0.992966		136	-21.6773	-0.58075	0	-21.6773	-0.58075
14	-0.773621	0.884445	0	-0.773621	0.884445		139	-19.5538	3.06778	0	-19.5538	3.06778
15	-1.37921	0.765427	0	-1.37921	0.765427		140	-20	3.30444	0	-20	3.30444
16	-1.45081	0.23732	0	-1.45081	0.23732		141	-23.3334	5.23328	0	-23.3334	5.23328
17	-1.48615	-0.011795	0	-1.48615	-0.011795		142	-23.7279	6.48944	0	-23.7279	6.48944
18	-1.35223	-0.602371	0	-1.35223	-0.602371		143	-24.3265	4.94101	0	-24.3265	4.94101
19	-1.32306	-0.959641	0	-1.32306	-0.959641		144	-24.7474	3.48065	0	-24.7474	3.48065
20	-1.24792	-0.210526	0	-1.24792	-0.210526		145	-24.1	3.91589	0	-24.1	3.91589
21	-1.15283	-0.808228	0	-1.15283	-0.808228		1	0	0	0	0	0
22	-1.39191	-0.597473	0	-1.39191	-0.597473		2	-0.204041	-0.313477	0	-0.204041	-0.313477
23	-1.30646	-0.332733	0	-1.30646	-0.332733		3	-0.58139	0.113647	0	-0.58139	0.113647
24	-1.36426	-0.616287	0	-1.36426	-0.616287		4	-1.10266	-0.347473	0	-1.10266	-0.347473
25	-1.80896	-0.638	0	-1.80896	-0.638		5	-0.30072	-0.628174	0	-0.30072	-0.628174
26	-1.79578	0.0657806	0	-1.79578	0.0657806		6	-0.1091	-0.586243	0	-0.1091	-0.586243
27	-1.58734	-0.538086	0	-1.58734	-0.538086		7	-0.0797424	0.575378	0	-0.0797424	0.575378
28	-1.23138	0.00906372	0	-1.23138	0.00906372		8	0.149658	0.000244141	0	0.149658	0.000244141
29	-1.37732	0.526688	0	-1.37732	0.526688		9	-0.213837	0.387573	0	-0.213837	0.387573
30	-1.21259	0.739716	0	-1.21259	0.739716		10	-0.0584412	0.629395	0	-0.0584412	0.629395
31	-1.60419	0.743332	0	-1.60419	0.743332		11	-1.52075	1.01086	0	-1.52075	1.01086
32	-1.60199	1.04669	0	-1.60199	1.04669		12	-1.84033	1.12231	0	-1.84033	1.12231
33	-1.79755	0.918808	0	-1.79755	0.918808		13	-1.53339	1.54675	0	-1.53339	1.54675
34	-2.05988	1.65422	0	-2.05988	1.65422		14	-1.49625	2.25842	0	-1.49625	2.25842
35	-2.15869	1.20436	0	-2.15869	1.20436		15	-1.8045	2.57745	0	-1.8045	2.57745
36	-2.08167	1.90622	0	-2.08167	1.90622		16	-1.78116	3.30115	0	-1.78116	3.30115
37	-2.31488	1.97726	0	-2.31488	1.97726		17	-2.3501	3.71228	0	-2.3501	3.71228
38	-2.54675	1.91232	0	-2.54675	1.91232		18	-3.07593	4.02899	0	-3.07593	4.02899
39	-2.27679	1.76045	0	-2.27679	1.76045		19	-2.82529	4.15741	0	-2.82529	4.15741
40	-2.31244	1.12994	0	-2.31244	1.12994		20	-2.66275	3.8891	0	-2.66275	3.8891
41	-1.91516	0.885223	0	-1.91516	0.885223		21	-2.10843	4.07867	0	-2.10843	4.07867
42	-1.74695	1.10454	0	-1.74695	1.10454		22	-2.24002	3.95111	0	-2.24002	3.95111
43	-1.70105	1.17621	0	-1.70105	1.17621		23	-2.49915	4.02673	0	-2.49915	4.02673
44	-1.54645	1.39302	0	-1.54645	1.39302		24	-2.25955	4.48932	0	-2.25955	4.48932
45	-1.22357	2.10202	0	-1.22357	2.10202		25	-2.71896	3.94824	0	-2.71896	3.94824
46	-0.974487	1.82478	0	-0.974487	1.82478		26	-2.48016	3.96851	0	-2.48016	3.96851
47	-1.36871	1.97726	0	-1.36871	1.97726		27	-2.5643	3.39673	0	-2.5643	3.39673
48	-1.14667	2.04359	0	-1.14667	2.04359		28	-3.10107	3.11145	0	-3.10107	3.11145
49	-1.25659	2.45404	0	-1.25659	2.45404		29	-3.32834	5.97235	0	-3.32834	5.97235
50	-1.23901	3.07964	0	-1.23901	3.07964		30	-3.78296	2.07043	0	-3.78296	2.07043
51	-1.71783	3.23462	0	-1.71783	3.23462		31	-3.72723	1.1618	0	-3.72723	1.1618
52	-1.30859	2.75029	0	-1.30859	2.75029		32	-4.13361	1.19928	0	-4.13361	1.19928
53	-1.41534	2.47427	0	-1.41534	2.47427		33	-3.20963	0.195618	0	-3.20963	0.195618
54	-1.78333	1.38651	0	-1.78333	1.38651		34	-4.58618	1.12842	0	-4.58618	1.12842
55	-2.20569	-1.02153	0	-2.20569	-1.02153		35	-4.29517	0.795837	0	-4.29517	0.795837
56	-1.4873	-0.850098	0	-1.4873	-0.850098		36	-3.82742	1.30286	0	-3.82742	1.30286
57	-1.16431	0.678024	0	-1.16431	0.678024		37	-5.84146	1.31165	0	-5.84146	1.31165
58	-1.32074	1.05127	0	-1.32074	1.05127		38	-6.35101	0.67688	0	-6.35101	0.67688
59	-0.986328	2.02612	0	-0.986328	2.02612		39	-4.4957	2.02484	0	-4.4957	2.02484
60	-0.997253	2.14784	0	-0.997253	2.14784		40	-5.05524	0.883057	0	-5.05524	0.883057
61	-1.73407	1.20763	0	-1.73407	1.20763		41	-3.84036	5.51556	0	-3.84036	5.51556
62	-1.55426	1.63406	0	-1.55426	1.63406		42	-4.59247	1.71088	0	-4.59247	1.71088
63	-0.904358	2.4801	0	-0.904358	2.4801		43	-4.94067	1.9259	0	-4.94067	1.9259
64	-0.718262	3.40916	0	-0.718262	3.40916		44	-5.22675	2.06311	0	-5.22675	2.06311
65	-0.302551	3.7002	0	-0.302551	3.7002		45	-7.92191	1.09973	0	-7.92191	1.09973
66	-0.138733	3.84059	0	-0.138733	3.84059		46	-6.00977	5.48895	0	-6.00977	5.48895
67	-0.0310059	3.57271	0	-0.0310059	3.57271		47	-9.16946	4.61365	0	-9.16946	4.61365
68	-0.870911	3.2238	0	-0.870911	3.2238		48	-6.17041	5.7099	0	-6.17041	5.7099
69	-0.903625	3.11478	0	-0.903625	3.11478		49	-6.70035	5.59937	0	-6.70035	5.59937
70	-0.971619	3.43587	0	-0.971619	3.43587		50	-6.79926	5.65393	0	-6.79926	5.65393
71	-1.90674	3.29276	0	-1.90674	3.29276		51	-10.0061	4.08734	0	-10.0061	4.08734
72	-1.46606	3.17722	0	-1.46606	3.17722		52	-6.81625	0.31073	0	-6.81625	0.31073
73	-1.69586	3.91675	0	-1.69586	3.91675		53	-10.2568	4.00977	0	-10.2568	4.00977
74	-1.5932	3.79666	0	-1.5932	3.79666		54	-8.77579	-0.568909	0	-8.77579	-0.568909
75	-1.4809	3.57271	0	-1.4809	3.57271		55	-10.4593	3.61646	0	-10.4593	3.61646
76	-1.46606	3.48232	0	-1.46606	3.48232		56	-9.69028	0.247192	0	-9.69028	0.247192
77	-1.41675	3.58466	0	-1.41675	3.58466		57	-9.71307	-0.30127	0	-9.71307	-0.30127
78	-1.68524	3.30196	0	-1.68524	3.30196		58	-10.0213	0.155396	0	-10.0213	0.155396
79	-1.42456	3.41197	0	-1.42456	3.41197		59	-10.169	-0.374329	0	-10.169	-0.374329
80	-1.46729	3.4346	0	-1.46729	3.4346		60	-9.00119	-1.44977	0	-9.00119	-1.44977
81	-1.67969	3.26196	0	-1.67969	3.26196		61	-10.0506	-1.22296	0	-10.0506	-1.22296
82	-1.59601	3.49503	0	-1.59601	3.49503		62	-10.0822	-2.00757	0	-10.0822	-2.00757
83	-1.49634	3.42027	0	-1.49634	3.42027		63	-10.5612	-1.86761	0	-10.5612	-1.86761
84	-1.08929	3.52791	0	-1.08929	3.52791		64	-10.9466	-1.65594	0	-10.9466	-1.65594
85	-0.817871	2.9769	0	-0.817871	2.9769		65	-10.7715	-2.65118	0	-10.7715	-2.65118
86	-1.85986	3.9362	0	-1.85986	3.9362		66	-11.8733	-2.48865	0	-11.8733	-2.48865
87	-1.74408	3.45654	0	-1.74408	3.45654		67	-9.46338	-3.88599	0	-9.46338	-3.88599
88	-1.76471	3.27676	0	-1.76471	3.27676		68	-11.8584	-2.88605	0	-11.8584	-2.88605
89	-1.95551	3.7433	0	-1.95551	3.7433		69	-12.14	-2.57947	0	-12.14	-2.57947
90	-2.17548	3.37114	0	-2.17548	3.37114		70	-12.4414	-2.72577	0	-12.4414	-2.72577
91	-2.81171	3.00574	0	-2.81171	3.00574		71	-9.93637	-4.15454	0	-9.93637	-4.15454
92	-2.2937	3.43199	0	-2.2937	3.43199		72	-10.5967	-4.50787	0	-10.5967	-4.50787
93	-2.7655	3.33542	0	-2.7655	3.33542		73	-14.0831	-3.76605	0	-14.0831	-3.76605
94	-2.81262	3.84657	0	-2.81262	3.84657		74	-14.2262	-4.69366	0	-14.2262	-4.69366
95	-2.44574	3.7267	0	-2.44574	3.7267		75	-14.829	-4.61627	0	-14.829	-4.61627
96	-2.60162	3.36717	0	-2.60162	3.36717		76	-14.6893	-5.66199	0	-14.6893	-5.66199
97	-2.51141	3.55031	0	-2.51141	3.55031		77	-14.8616	-6.47278	0	-14.8616	-6.47278
98	-3.06171	3.34172	0	-3.06171	3.34172		78	-14.4032	-6.23407	0	-14.4032	-6.23407
99	-2.56421	3.19263	0	-2.56421	3.19263		79	-15.0286	-6.11743	0	-15.0286	-6.11743
100	-2.63538	3.55127	0	-2.63538	3.55127		80	-15.1302	-7.48865	0	-15.1302	-7.48865
101	-2.43341	4.04671	0	-2.43341	4.04671		81	-15.0079	-7.49066	0	-15.0079	-7.49066
102	-2.64026	3.76628	0	-2.64026	3.76628		82	-15.3582	-7.33746	0	-15.3582	-7.33746
103	-2.22858	4.02771	0	-2.22858	4.02771		83	-14.5461	-8.81696	0	-14.5461	-8.81696
104	-2.34229	3.4346	0	-2.34229	3.4346		84	-13.6913	-7.39563	0	-13.6913	-7.39563
105	-2.45325	3.74414	0	-2.45325	3.74414		85	-15.2725	-7.74146	0	-15.2725	-7.74146
106	-1.69775	3.48471	0	-1.69775	3.48471		86	-14.3873	-8.89478	0	-14.3873	-8.89478
107	-2.36786	3.34216	0	-2.36786	3.34216		87	-15.3289	-8.96973	0	-15.3289	-8.96973
108	-1.61493	3.42139	0	-1.61493	3.42139		88	-15.7651	-9.74365	0	-15.7651	-9.74365
109	-2.20636	3.45062	0	-2.20636	3.45062		89	-15.2557	-9.56891	0	-15.2557	-9.56891
110	-2.28406	3.70589	0	-2.28406	3.70589		90	-15.8029	-9.97754	0	-15.8029	-9.97754
111	-2.29584	3.24846	0	-2.29584	3.24846		91	-15.4169	-8.99805	0	-15.4169	-8.99805
112	-2.35376	3.16928	0	-2.35376	3.16928		92	-16.298	-10.6287	0	-16.298	-10.6287
113	-2.55981	2.91962	0	-2.55981	2.91962		93	-16.0339	-10.5532	0	-16.0339	-10.5532
114	-2.31757	2.85641	0	-2.31757	2.85641		94	-16.4832	-10.6642	0	-16.4832	-10.6642
115	-1.77185	1.87688	0	-1.77185	1.87688		95	-16.4218	-9.96881	0	-16.4218	-9.96881
116	-2.29144	1.90556	0	-2.29144	1.90556		96	-16.4814	-9.67828	0	-16.4814	-9.67828
117	-2.36523	2.51312	0	-2.36523	2.51312		97	-16.9761	-10.8142	0	-16.9761	-10.8142
118	-1.7052	2.91203	0	-1.7052	2.91203		98	-16.858	-10.9538	0	-16.858	-10.9538
119	-2.27759	2.89108	0	-2.27759	2.89108		99	-16.7758	-10.2781	0	-16.7758	-10.2781
120	-1.79376	2.48383	0	-1.79376	2.48383		100	-17.3881	-11.2847	0	-17.3881	-11.2847
121	-1.77081	1.68884	0	-1.77081	1.68884		101	-17.5388	-12.0488	0	-17.5388	-12.0488
122	-1.96454	1.81906	0	-1.96454	1.81906		102	-17.8416	-11.5843	0	-17.8416	-11.5843
123	-2.12793	2.56148	0	-2.12793	2.56148		103	-18.108	-12.802	0	-18.108	-12.802
124	-2.09875	2.8148	0	-2.09875	2.8148		104	-18.7953	-13.4246	0	-18.7953	-13.4246
125	-3.48785	2.02814	0	-3.48785	2.02814		105	-19.084	-12.8265	0	-19.084	-12.8265
126	-5.11633	1.00165	0	-5.11633	1.00165		106	-19.6329	-13.6971	0	-19.6329	-13.6971
127	-5.13843	1.84914	0	-5.13843	1.84914		107	-20.427	-14.8689	0	-20.427	-14.8689
128	-4.85242	1.36772	0	-4.85242	1.36772		108	-20.9335	-15.7065	0	-20.9335	-15.7065
129	-4.32825	1.97987	0	-4.32825	1.97987		109	-20.8602	-15.4656	0	-20.8602	-15.4656
130	-3.54889	2.14828	0	-3.54889	2.14828		110	-21.7746	-16.386	0	-21.7746	-16.386
131	-3.21613	2.41513	0	-3.21613	2.41513		111	-21.9792	-15.4459	0	-21.9792	-15.4459
132	-4.07043	2.1548	0	-4.07043	2.1548		112	-22.6969	-16.8903	0	-22.6969	-16.8903
133	-4.65125	2.897	0	-4.65125	2.897		113	-22.8144	-17.5485	0	-22.8144	-17.5485
134	-4.91058	3.52092	0	-4.91058	3.52092		114	-23.2871	-15.2632	0	-23.2871	-15.2632
135	-4.23511	3.0125	0	-4.23511	3.0125		115	-23.8889	-16.5306	0	-23.8889	-16.5306
136	-4.31274	3.45729	0	-4.31274	3.45729		116	-24.2897	-15.9114	0	-24.2897	-15.9114
1	0	0	0	0	0		117	-24.5063	-16.6041	0	-24.5063	-16.6041
2	0.131348	0.45874	0	0.131348	0.45874		118	-25.3661	-16.9943	0	-25.3661	-16.9943
3	-0.179565	0.0326996	0	-0.179565	0.0326996		119	-25.5589	-13.5584	0	-25.5589	-13.5584
4	-0.31073	0.635284	0	-0.31073	0.635284		120	-25.9842	-16.7396	0	-25.9842	-16.7396
5	0.060791	1.09973	0	0.060791	1.09973		121	-25.9483	-17.6254	0	-25.9483	-17.6254
6	0.707397	1.0368	0	0.707397	1.0368		122	-26.6718	-18.4231	0	-26.6718	-18.4231
7	0.475647	1.02098	0	0.475647	1.02098		123	-26.9443	-18.3749	0	-26.9443	-18.3749
8	0.902954	1.01585	0	0.902954	1.01585		124	-27.2473	-19.548	0	-27.2473	-19.548
9	0.935791	1.10939	0	0.935791	1.10939		125	-27.9209	-19.366	0	-27.9209	-19.366
10	0.573181	0.835541	0	0.573181	0.835541		126	-28.9225	-20.0708	0	-28.9225	-20.0708
11	-0.248596	0.697433	0	-0.248596	0.697433		127	-28.2609	-18.054	0	-28.2609	-18.054
12	-1.03796	0.884232	0	-1.03796	0.884232		128	-30.3612	-18.7914	0	-30.3612	-18.7914
13	-0.840271	1.1472	0	-0.840271	1.1472		129	-31.5768	-19.3373	0	-31.5768	-19.3373
14	-0.42041	1.4359	0	-0.42041	1.4359		130	-32.4055	-20.5359	0	-32.4055	-20.5359
15	-0.722473	1.73842	0	-0.722473	1.73842		131	-32.642	-20.0801	0	-32.642	-20.0801
16	-0.372864	1.86272	0	-0.372864	1.86272		132	-31.4131	-18.208	0	-31.4131	-18.208
17	-0.766479	2.15886	0	-0.766479	2.15886		133	-33.0782	-16.4125	0	-33.0782	-16.4125
18	0.0560913	2.50731	0	0.0560913	2.50731		134	-32.4862	-18.9916	0	-32.4862	-18.9916
19	0.404358	2.73373	0	0.404358	2.73373		135	-32.7418	-18.6263	0	-32.7418	-18.6263
20	0.899231	3.18021	0	0.899231	3.18021		136	-32.9788	-19.3564	0	-32.9788	-19.3564
21	1.43518	2.99568	0	1.43518	2.99568		137	-33.2031	-18.5612	0	-33.2031	-18.5612
22	1.02808	2.26489	0	1.02808	2.26489		138	-34.3525	-18.7197	0	-34.3525	-18.7197
23	0.753357	1.95656	0	0.753357	1.95656		139	-35.2095	-18.1621	0	-35.2095	-18.1621
24	0.743286	2.2193	0	0.743286	2.2193		140	-34.5589	-21.3644	0	-34.5589	-21.3644
25	0.887451	2.29837	0	0.887451	2.29837		141	-33.6754	-23.5987	0	-33.6754	-23.5987
26	1.12244	2.89522	0	1.12244	2.89522		142	-33.6796	-23.6045	0	-33.6796	-23.6045
27	0.544739	3.40454	0	0.544739	3.40454		143	-34.1812	-25.92	0	-34.1812	-25.92
28	1.19244	3.23775	0	1.19244	3.23775		144	-33.5221	-27.2099	0	-33.5221	-27.2099
29	1.20276	2.33522	0	1.20276	2.33522		145	-32.7871	-27.2197	0	-32.7871	-27.2197
30	1.3205	1.29803	0	1.3205	1.29803		1	0	0	0	0	0
31	1.39655	0.910858	0	1.39655	0.910858		2	-0.088562	0.0114136	0	-0.088562	0.0114136
32	1.60168	0.346375	0	1.60168	0.346375		3	-0.183411	0.0114136	0	-0.183411	0.0114136
33	0.889221	0.324554	0	0.889221	0.324554		4	-0.211182	0.576477	0	-0.211182	0.576477
34	-0.437378	0.766769	0	-0.437378	0.766769		5	-0.486694	0.792664	0	-0.486694	0.792664
35	-0.662659	-0.26207	0	-0.662659	-0.26207		6	-0.76709	1.1077	0	-0.76709	1.1077
36	-0.135681	-0.119354	0	-0.135681	-0.119354		7	-0.751282	1.25174	0	-0.751282	1.25174
37	-0.841797	-0.206528	0	-0.841797	-0.206528		8	-0.345581	1.41501	0	-0.345581	1.41501
38	-1.06445	-0.046051	0	-1.06445	-0.046051		9	-0.57959	1.35577	0	-0.57959	1.35577
39	-0.509094	-0.105698	0	-0.509094	-0.105698		10	-0.896179	1.29065	0	-0.896179	1.29065
40	-0.16156	-0.309357	0	-0.16156	-0.309357		11	-1.27063	1.26282	0	-1.27063	1.26282
41	-0.672791	0.0273285	0	-0.672791	0.0273285		12	-2.68439	0.699524	0	-2.68439	0.699524
42	-10.0626	2.21149	0	-10.0626	2.21149		13	-1.57886	-0.22113	0	-1.57886	-0.22113
43	-1.04694	-0.636871	0	-1.04694	-0.636871		14	-0.6745	0.277161	0	-0.6745	0.277161
44	-1.51678	-0.918411	0	-1.51678	-0.918411		15	-0.174072	-0.201111	0	-0.174072	-0.201111
45	-2.04596	-0.952667	0	-2.04596	-0.952667		16	-0.0652466	-0.175476	0	-0.0652466	-0.175476
46	-2.83447	-1.09854	0	-2.83447	-1.09854		17	0.193604	-0.339874	0	0.193604	-0.339874
47	-2.79114	-1.44849	0	-2.79114	-1.44849		18	0.606079	0.26416	0	0.606079	0.26416
48	-2.46674	-1.83894	0	-2.46674	-1.83894		19	1.20691	-0.390656	0	1.20691	-0.390656
49	-2.46057	-2.4698	0	-2.46057	-2.4698		20	2.02081	-0.676056	0	2.02081	-0.676056
50	-2.57031	-1.51205	0	-2.57031	-1.51205		21	2.43915	-1.39551	0	2.43915	-1.39551
51	-1.90021	-1.46455	0	-1.90021	-1.46455		22	2.97913	-2.50107	0	2.97913	-2.50107
52	-2.24878	-1.66879	0	-2.24878	-1.66879		23	2.86346	-1.99957	0	2.86346	-1.99957
53	-2.92096	-1.17903	0	-2.92096	-1.17903		24	3.90308	-4.21735	0	3.90308	-4.21735
54	-3.1861	-1.57303	0	-3.1861	-1.57303		25	4.16302	-5.07629	0	4.16302	-5.07629
55	-5.36304	-3.9015	0	-5.36304	-3.9015		26	4.05713	-5.22351	0	4.05713	-5.22351
56	-5.42261	-2.9543	0	-5.42261	-2.9543		27	4.57831	-5.31189	0	4.57831	-5.31189
57	-5.44177	-2.81192	0	-5.44177	-2.81192		28	5.38379	-5.28714	0	5.38379	-5.28714
58	-5.49524	-3.07487	0	-5.49524	-3.07487		29	5.91339	-5.36395	0	5.91339	-5.36395
59	-4.81561	-3.86456	0	-4.81561	-3.86456		30	6.27399	-5.26669	0	6.27399	-5.26669
60	-4.81592	-3.98116	0	-4.81592	-3.98116		31	6.22009	-5.76245	0	6.22009	-5.76245
61	-4.87671	-3.5451	0	-4.87671	-3.5451		32	6.01849	-6.04077	0	6.01849	-6.04077
62	-3.59528	-3.10289	0	-3.59528	-3.10289		33	6.62476	-6.18933	0	6.62476	-6.18933
63	-3.21472	-2.90338	0	-3.21472	-2.90338		34	6.7337	-6.72766	0	6.7337	-6.72766
64	-2.21228	-2.86356	0	-2.21228	-2.86356		35	6.32684	-6.53732	0	6.32684	-6.53732
65	-1.73804	-2.4158	0	-1.73804	-2.4158		36	5.99811	-7.02335	0	5.99811	-7.02335
66	-1.36938	-2.35425	0	-1.36938	-2.35425		37	6.08044	-7.16119	0	6.08044	-7.16119
67	-1.29529	-1.91547	0	-1.29529	-1.91547		38	5.47345	-8.45953	0	5.47345	-8.45953
68	-1.12097	-1.71745	0	-1.12097	-1.71745		39	5.00531	-8.11588	0	5.00531	-8.11588
69	-1.2619	-1.2578	0	-1.2619	-1.2578		40	5.47986	-8.09653	0	5.47986	-8.09653
70	-1.04834	-1.73949	0	-1.04834	-1.73949		41	5.62341	-8.72058	0	5.62341	-8.72058
71	-1.35736	-1.47684	0	-1.35736	-1.47684		42	5.66064	-9.08768	0	5.66064	-9.08768
72	-1.39606	-2.0988	0	-1.39606	-2.0988		43	5.03833	-10.0617	0	5.03833	-10.0617
73	-1.82892	-2.29454	0	-1.82892	-2.29454		44	5.8219	-9.75708	0	5.8219	-9.75708
74	-1.91223	-1.79921	0	-1.91223	-1.79921		45	5.80353	-10.1959	0	5.80353	-10.1959
75	-2.34277	-1.5493	0	-2.34277	-1.5493		46	6.18408	-10.9004	0	6.18408	-10.9004
76	-2.60181	-1.96303	0	-2.60181	-1.96303		47	7.20978	-11.7489	0	7.20978	-11.7489
77	-2.7605	-1.92776	0	-2.7605	-1.92776		48	8.03729	-13.2113	0	8.03729	-13.2113
78	-2.65485	-1.82875	0	-2.65485	-1.82875		49	7.41327	-14.0856	0	7.41327	-14.0856
79	-2.90656	-1.73804	0	-2.90656	-1.73804		50	8.72437	-14.9523	0	8.72437	-14.9523
80	-2.98309	-1.6553	0	-2.98309	-1.6553		51	9.54065	-15.4986	0	9.54065	-15.4986
81	-2.94336	-2.06325	0	-2.94336	-2.06325		52	9.9223	-15.5495	0	9.9223	-15.5495
82	-2.04132	-1.22437	0	-2.04132	-1.22437		53	9.84711	-16.0819	0	9.84711	-16.0819
83	-2.59528	-0.990677	0	-2.59528	-0.990677		54	10.5718	-17.1606	0	10.5718	-17.1606
84	-13.136	3.66025	0	-13.136	3.66025		55	10.6168	-17.348	0	10.6168	-17.348
85	-5.31982	2.37157	0	-5.31982	2.37157		56	10.7103	-17.6832	0	10.7103	-17.6832
86	-4.43512	1.88014	0	-4.43512	1.88014		57	10.4878	-17.9119	0	10.4878	-17.9119
87	-11.6725	3.75404	0	-11.6725	3.75404		58	11.2278	-19.2338	0	11.2278	-19.2338
88	-3.28296	1.01871	0	-3.28296	1.01871		59	12.3723	-18.9323	0	12.3723	-18.9323
89	-3.53027	1.83771	0	-3.53027	1.83771		60	13.1025	-19.8537	0	13.1025	-19.8537
90	-3.67786	2.94315	0	-3.67786	2.94315		61	13.1418	-19.5596	0	13.1418	-19.5596
91	-3.15723	3.13145	0	-3.15723	3.13145		62	13.3229	-19.9529	0	13.3229	-19.9529
92	-2.12598	3.92368	0	-2.12598	3.92368		63	13.6922	-20.5716	0	13.6922	-20.5716
93	-1.58319	5.2195	0	-1.58319	5.2195		64	13.7377	-21.0726	0	13.7377	-21.0726
94	-1.60901	4.37315	0	-1.60901	4.37315		65	13.5905	-20.2994	0	13.5905	-20.2994
95	-1.55212	3.29384	0	-1.55212	3.29384		66	13.3301	-20.7115	0	13.3301	-20.7115
96	-1.39081	3.5246	0	-1.39081	3.5246		67	13.7783	-20.2197	0	13.7783	-20.2197
97	-1.6748	2.5215	0	-1.6748	2.5215		68	12.9858	-20.1428	0	12.9858	-20.1428
98	-1.7074	1.96002	0	-1.7074	1.96002		69	13.8151	-19.8882	0	13.8151	-19.8882
99	-1.55109	1.45016	0	-1.55109	1.45016		70	13.5328	-19.2779	0	13.5328	-19.2779
100	-1.547	1.23157	0	-1.547	1.23157		71	13.2009	-18.9924	0	13.2009	-18.9924
101	-1.76141	0.94603	0	-1.76141	0.94603		72	11.6524	-18.3806	0	11.6524	-18.3806
102	-1.73358	0.189835	0	-1.73358	0.189835		73	11.2189	-18.1414	0	11.2189	-18.1414
103	-2.14325	-0.355713	0	-2.14325	-0.355713		74	10.8143	-17.3671	0	10.8143	-17.3671
104	-1.72491	-0.296921	0	-1.72491	-0.296921		75	11.1064	-16.4609	0	11.1064	-16.4609
105	-1.40198	-0.836151	0	-1.40198	-0.836151		76	11.5616	-16.7172	0	11.5616	-16.7172
106	-1.31464	-0.746307	0	-1.31464	-0.746307		77	11.8715	-16.5461	0	11.8715	-16.5461
107	-1.89893	0.448853	0	-1.89893	0.448853		78	12.4795	-16.7416	0	12.4795	-16.7416
108	-2.09113	0.954987	0	-2.09113	0.954987		79	12.2841	-16.4294	0	12.2841	-16.4294
109	-2.0318	1.51794	0	-2.0318	1.51794		80	12.0612	-16.9184	0	12.0612	-16.9184
110	-1.95465	2.76608	0	-1.95465	2.76608		81	12.0024	-16.7228	0	12.0024	-16.7228
111	-2.0509	1.69698	0	-2.0509	1.69698		82	11.683	-17.2743	0	11.683	-17.2743
112	-2.3681	0.328903	0	-2.3681	0.328903		83	12.6906	-17.5668	0	12.6906	-17.5668
113	-2.22113	0.45224	0	-2.22113	0.45224		84	13.6198	-18.2764	0	13.6198	-18.2764
114	-2.32758	-0.859436	0	-2.32758	-0.859436		85	14.7822	-18.3725	0	14.7822	-18.3725
115	-2.03259	-0.324341	0	-2.03259	-0.324341		86	14.3148	-19.1935	0	14.3148	-19.1935
116	-2.04187	-0.2789	0	-2.04187	-0.2789		87	14.2535	-19.3582	0	14.2535	-19.3582
117	-1.35571	-0.40741	0	-1.35571	-0.40741		88	14.3901	-20.7532	0	14.3901	-20.7532
118	-1.18262	-0.443146	0	-1.18262	-0.443146		89	14.2613	-19.9555	0	14.2613	-19.9555
119	-1.41071	-0.633362	0	-1.41071	-0.633362		90	14.4801	-20.6453	0	14.4801	-20.6453
120	-1.34528	-1.25017	0	-1.34528	-1.25017		91	14.862	-22.3343	0	14.862	-22.3343
121	-1.31555	-1.56836	0	-1.31555	-1.56836		92	14.5782	-24.6129	0	14.5782	-24.6129
122	-1.80768	-1.95421	0	-1.80768	-1.95421		93	14.9499	-24.8402	0	14.9499	-24.8402
123	-3.11292	-3.22339	0	-3.11292	-3.22339		94	16.2421	-25.581	0	16.2421	-25.581
124	-5.21478	-5.25464	0	-5.21478	-5.25464		95	15.5414	-27.1626	0	15.5414	-27.1626
125	-7.48438	-6.4052	0	-7.48438	-6.4052		96	15.9623	-27.5872	0	15.9623	-27.5872
126	-8.40601	-6.75804	0	-8.40601	-6.75804		97	15.2744	-28.5109	0	15.2744	-28.5109
127	-9.89954	-7.6647	0	-9.89954	-7.6647		98	14.6971	-28.6964	0	14.6971	-28.6964
128	-11.2483	-8.31877	0	-11.2483	-8.31877		99	14.9523	-29.6941	0	14.9523	-29.6941
129	-11.6665	-8.72559	0	-11.6665	-8.72559		100	15.1583	-29.5149	0	15.1583	-29.5149
130	-11.9232	-9.4684	0	-11.9232	-9.4684		101	14.7654	-30.6417	0	14.7654	-30.6417
131	-11.9042	-9.06335	0	-11.9042	-9.06335		102	15.2888	-31.4256	0	15.2888	-31.4256
132	-6.68286	-4.61816	0	-6.68286	-4.61816		103	16.1908	-32.0455	0	16.1908	-32.0455
133	-9.49219	-6.97867	0	-9.49219	-6.97867		104	15.4159	-34.0075	0	15.4159	-34.0075
134	-9.56097	-7.22479	0	-9.56097	-7.22479		105	16.402	-35.0237	0	16.402	-35.0237
135	-9.23773	-6.83681	0	-9.23773	-6.83681		106	17.4804	-35.9232	0	17.4804	-35.9232
136	-9.33801	-6.84683	0	-9.33801	-6.84683		107	17.385	-36.4832	0	17.385	-36.4832
1	0	0	0	0	0		108	18.1984	-37.6405	0	18.1984	-37.6405
2	0.138092	0.0131531	0	0.138092	0.0131531		109	17.7231	-38.9569	0	17.7231	-38.9569
3	0.14328	0.31192	0	0.14328	0.31192		110	17.9265	-39.7249	0	17.9265	-39.7249
4	0.183563	0.13443	0	0.183563	0.13443		111	17.8729	-40.6847	0	17.8729	-40.6847
5	0.371643	0.348877	0	0.371643	0.348877		112	17.8389	-41.8015	0	17.8389	-41.8015
6	0.464264	0.539124	0	0.464264	0.539124		113	17.7904	-42.2777	0	17.7904	-42.2777
7	0.781921	1.03479	0	0.781921	1.03479		114	18.9805	-43.6322	0	18.9805	-43.6322
8	0.973419	0.943451	0	0.973419	0.943451		115	19.3471	-43.2086	0	19.3471	-43.2086
9	1.10822	0.749664	0	1.10822	0.749664		116	20.7598	-42.6023	0	20.7598	-42.6023
10	0.928284	0.622681	0	0.928284	0.622681		117	19.8768	-42.4884	0	19.8768	-42.4884
11	0.440125	0.382263	0	0.440125	0.382263		118	20.0391	-42.4391	0	20.0391	-42.4391
12	-0.0134888	1.34705	0	-0.0134888	1.34705		119	20.4293	-43.7434	0	20.4293	-43.7434
13	-0.0281982	1.03479	0	-0.0281982	1.03479		120	20.5075	-44.4461	0	20.5075	-44.4461
14	0.0672302	0.879425	0	0.0672302	0.879425		121	20.5143	-45.6797	0	20.5143	-45.6797
15	0.0622864	1.13486	0	0.0622864	1.13486		122	18.8914	-46.8011	0	18.8914	-46.8011
16	-0.227997	1.19016	0	-0.227997	1.19016		123	18.7184	-47.2869	0	18.7184	-47.2869
17	-0.513702	1.27127	0	-0.513702	1.27127		124	19.9321	-48.3305	0	19.9321	-48.3305
18	-0.778717	1.33279	0	-0.778717	1.33279		125	20.0198	-49.1472	0	20.0198	-49.1472
19	-0.619812	1.2561	0	-0.619812	1.2561		126	21.3028	-50.1813	0	21.3028	-50.1813
20	-0.283905	0.960236	0	-0.283905	0.960236		127	20.4137	-50.4589	0	20.4137	-50.4589
21	-0.800629	1.40768	0	-0.800629	1.40768		128	20.5182	-50.679	0	20.5182	-50.679
22	-0.647491	1.25232	0	-0.647491	1.25232		129	20.7523	-50.9488	0	20.7523	-50.9488
23	-0.828888	1.63367	0	-0.828888	1.63367		130	20.9485	-50.717	0	20.9485	-50.717
24	-0.845032	1.51126	0	-0.845032	1.51126		131	21.2291	-51.4403	0	21.2291	-51.4403
25	-0.619812	1.55927	0	-0.619812	1.55927		132	21.0986	-51.6189	0	21.0986	-51.6189
26	-0.779266	1.54578	0	-0.779266	1.54578		133	20.55	-51.3817	0	20.55	-51.3817
27	-0.802856	1.76505	0	-0.802856	1.76505		134	19.916	-50.4482	0	19.916	-50.4482
28	-0.704468	1.92557	0	-0.704468	1.92557		135	19.5421	-50.8599	0	19.5421	-50.8599
29	-0.756256	1.40768	0	-0.756256	1.40768		136	19.9233	-51.524	0	19.9233	-51.524
30	-0.529602	1.75864	0	-0.529602	1.75864		137	19.1183	-50.5677	0	19.1183	-50.5677
31	-0.825287	1.43839	0	-0.825287	1.43839		138	20.9937	-51.834	0	20.9937	-51.834
32	-0.756256	1.40768	0	-0.756256	1.40768		139	17.9888	-54.5554	0	17.9888	-54.5554
33	-0.825287	1.28491	0	-0.825287	1.28491		140	19.9108	-51.0932	0	19.9108	-51.0932
34	-0.931519	1.83795	0	-0.931519	1.83795		141	18.7596	-53.9811	0	18.7596	-53.9811
35	-0.756256	1.6199	0	-0.756256	1.6199		142	18.2126	-53.5744	0	18.2126	-53.5744
36	-0.341919	1.69452	0	-0.341919	1.69452		143	17.9174	-53.8521	0	17.9174	-53.8521
37	-0.351562	1.66785	0	-0.351562	1.66785		144	22.1069	-55.9089	0	22.1069	-55.9089
38	-0.699738	1.45612	0	-0.699738	1.45612		145	21.7637	-55.7808	0	21.7637	-55.7808
39	-0.661194	1.56854	0	-0.661194	1.56854		1	0	0	0	0	0
40	-0.625397	1.78384	0	-0.625397	1.78384		2	-0.0325623	-0.153748	0	-0.0325623	-0.153748
41	-0.661194	1.64166	0	-0.661194	1.64166		3	0.369934	-0.229919	0	0.369934	-0.229919
42	-0.549072	1.61484	0	-0.549072	1.61484		4	0.249969	0.673706	0	0.249969	0.673706
43	-0.441467	1.85965	0	-0.441467	1.85965		5	0.421661	0.74707	0	0.421661	0.74707
44	-0.538727	1.37662	0	-0.538727	1.37662		6	0.270264	1.16937	0	0.270264	1.16937
45	-0.618134	1.6839	0	-0.618134	1.6839		7	0.577148	1.36731	0	0.577148	1.36731
46	-0.605072	2.02914	0	-0.605072	2.02914		8	0.635803	1.44904	0	0.635803	1.44904
47	-0.69043	1.37845	0	-0.69043	1.37845		9	0.57663	1.40497	0	0.57663	1.40497
48	-0.119019	1.51782	0	-0.119019	1.51782		10	0.812225	2.03052	0	0.812225	2.03052
49	-0.4216	1.61484	0	-0.4216	1.61484		11	0.511505	2.23364	0	0.511505	2.23364
50	-0.149933	1.72601	0	-0.149933	1.72601		12	-1.17371	1.70093	0	-1.17371	1.70093
51	-0.295624	1.71478	0	-0.295624	1.71478		13	-0.324799	3.11761	0	-0.324799	3.11761
52	-0.239594	1.5275	0	-0.239594	1.5275		14	0.0322571	3.5733	0	0.0322571	3.5733
53	-0.0701904	2.06952	0	-0.0701904	2.06952		15	0.0941467	4.74207	0	0.0941467	4.74207
54	-0.441467	1.85965	0	-0.441467	1.85965		16	0.576233	5.26422	0	0.576233	5.26422
55	-0.178131	1.72565	0	-0.178131	1.72565		17	1.07745	5.57098	0	1.07745	5.57098
56	-0.359406	1.64728	0	-0.359406	1.64728		18	0.67627	6.08173	0	0.67627	6.08173
57	-0.180786	1.7146	0	-0.180786	1.7146		19	0.831726	5.65094	0	0.831726	5.65094
58	-0.69043	1.43692	0	-0.69043	1.43692		20	0.500275	6.06525	0	0.500275	6.06525
59	-0.538727	1.37662	0	-0.538727	1.37662		21	0.226929	6.75189	0	0.226929	6.75189
60	-0.574341	1.6199	0	-0.574341	1.6199		22	0.12796	7.12494	0	0.12796	7.12494
61	-0.482788	1.82199	0	-0.482788	1.82199		23	-0.230377	6.39453	0	-0.230377	6.39453
62	-0.0177917	1.4808	0	-0.0177917	1.4808		24	-0.59021	6.40912	0	-0.59021	6.40912
63	-0.437531	1.82199	0	-0.437531	1.82199		25	-1.1944	6.02423	0	-1.1944	6.02423
64	-0.274597	1.71841	0	-0.274597	1.71841		26	0.14386	6.18134	0	0.14386	6.18134
65	-0.149567	1.86639	0	-0.149567	1.86639		27	0.329468	5.51971	0	0.329468	5.51971
66	-0.1203	1.82681	0	-0.1203	1.82681		28	0.76181	6.19196	0	0.76181	6.19196
67	-0.0598755	2.05164	0	-0.0598755	2.05164		29	2.01422	6.58081	0	2.01422	6.58081
68	-0.286346	2.01401	0	-0.286346	2.01401		30	1.91446	6.82306	0	1.91446	6.82306
69	0.0150146	1.78207	0	0.0150146	1.78207		31	2.12619	7.15375	0	2.12619	7.15375
70	0.139679	1.69824	0	0.139679	1.69824		32	0.432983	7.94843	0	0.432983	7.94843
71	-1.12314	1.73715	0	-1.12314	1.73715		33	0.467957	7.64996	0	0.467957	7.64996
72	-1.00012	1.80103	0	-1.00012	1.80103		34	0.588867	7.80383	0	0.588867	7.80383
73	-0.880554	1.64075	0	-0.880554	1.64075		35	2.7514	8.01257	0	2.7514	8.01257
74	-0.851868	1.90167	0	-0.851868	1.90167		36	2.34628	8.20514	0	2.34628	8.20514
[truncated: 11,928 more rows]

## Sheet: Fig 5B
Time(min)	WT		KO
	Mean	SEM	Mean	SEM
0.25	5.77381	0.419207	4.97815	0.369358
0.5	13.3244	1.04918	12.2315	1.03172
0.75	22.3414	1.8516	21.9077	1.94102
1	32.2523	2.7824	33.2355	3.01754
1.25	42.9523	3.86187	45.9625	4.25192
1.5	54.8798	5.17654	60.9138	5.68956
1.75	66.4426	6.58813	76.3229	7.24957
2	80.4822	8.20195	92.3034	8.86137
2.25	93.4997	9.81214	108.968	10.5589
2.5	106.601	11.4786	127.256	12.4233
2.75	119.659	13.2235	145.251	14.2385
3	131.312	15.0609	164.85	16.2471
3.25	146.357	17.1759	185.512	18.28
3.5	159.311	19.2662	205.427	20.2662
3.75	172.549	21.1775	225.883	22.2985
4	187.337	23.2801	249.441	24.617
4.25	200.658	25.2184	271.552	26.9103
4.5	213.897	27.1306	294.282	29.2947
4.75	229.114	29.2266	318.627	32.0957
5	243.881	31.3661	342.137	34.6474
5.25	257.397	33.8793	366.084	37.277
5.5	270.908	36.3743	390.516	40.0104
5.75	282.629	38.6118	419.219	43.156
6	294.673	40.4201	444.631	46.0686
6.25	308.943	42.6043	470.434	49.1137
6.5	320.784	44.3893	496.505	52.2539
6.75	332.575	46.674	522.877	55.5195
7	339.809	48.7682	549.447	58.8947
7.25	350.886	50.5942	576.587	62.4242
7.5	361.896	52.405	604.142	66.0347
7.75	372.881	54.1586	632.009	69.7361
8	377.145	56.1377	660.225	73.5249
8.25	393.669	59.0239	688.764	77.3958
8.5	403.994	60.6898	724.926	81.9846
8.75	417.02	62.9884	754.029	85.9924
9	428.986	65.3053	792.17	90.8171
9.25	443.825	68.3572	822.41	95.1131
9.5	456.341	70.5995	852.995	99.52
9.75	466.035	71.8806	883.854	104.014
10	476.044	73.9991	927.073	110.923
10.25	484.879	75.1591	926.876	112.57
10.5	493.289	76.2297	939.772	117.451
10.75	465.444	67.5545	975.812	123.857
11	474.662	69.4467	1006.6	128.87
11.25	484.005	71.3858	1037.51	133.989
11.5	506.347	75.9244	1068.56	139.161
11.75	515.835	77.9893	1066.24	142.283
12	525.193	80.0383	1103.58	149.383
12.25	534.72	82.1011	1134.67	154.75
12.5	544.175	84.1873	1168.27	162.364
12.75	539.986	87.5946	1214.77	169.614
13	549.32	89.7885	1246.87	175.337
13.25	563.911	93.1247	1279.28	183.634
13.5	573.008	95.3923	1219.51	167.987
13.75	600.794	101.348	1229.22	174.316
14	610.115	103.782	1257.91	179.263
14.25	619.289	106.199	1299.83	186.516
14.5	633.613	110.087	1329.56	191.585
14.75	642.266	112.494	1344.22	199.051
15	650.743	114.881	1373.69	204.207
15.25	659.143	117.329	1403.32	209.389
15.5	667.412	119.767	1433.51	214.642
15.75	675.615	122.189	1463.7	219.917
16	690.727	126.244	1503.63	228.485
16.25	698.843	128.591	1534.33	233.937
16.5	716.324	132.558	1565.22	239.409
16.75	724.233	134.833	1596.19	244.949
17	732.353	139.137	1626.99	250.44
17.25	739.087	141.264	1672.51	259.526
17.5	745.485	143.303	1703.54	265.191
17.75	751.664	145.267	1734.58	270.883
18	757.75	147.177	1765.02	276.562
18.25	733.089	148.135	1802.05	286.624
18.5	745.225	152.02	1809.84	296.237
18.75	759.853	155.816	1861.91	306.33
19	771.016	159.999	1892.03	312.399
19.25	775.219	161.675	1922.25	318.582
19.5	786.509	165.798	1952.8	324.954
19.75	790.261	167.312	1865.02	314.731
20	799.05	171.734	1893.1	320.917
20.25	802.686	173.304	1921.19	327.213
20.5	806.158	174.924	1899.04	342.614
20.75	809.54	176.592	1928.64	349.496
21	809.038	181.277	1958.37	356.49
21.25	812.46	183.106	1988.54	363.575
21.5	816.051	184.893	2018.7	370.744
21.75	807.076	192.408	2048.77	377.989
22	667.009	122.291	2078.99	385.303
22.25	686.081	128.94	2109.57	392.712
22.5	686.022	128.524	2162.2	406.463
22.75	685.823	128.043	2194	414.253
23	685.727	127.546	2279.03	442.327
23.25	667.874	136.098	2108.6	409.781
23.5	671.025	141.771	1653.64	269.387
23.75	687.972	150.641	1725.65	282.634
24	682.295	163.844	1725.1	308.542
24.25	695.891	168.035	1764.43	332.058
24.5	740.774	200.666	1635.44	345.497
24.75	632.408	157.145	1497.01	313.103

## Sheet: Fig 5C
3_WT_1Ca_ADP	4_KO_1Ca_ADP
3	5.4
7.8	3.6
6	3
3.6	3.6
6.6	5.4
4.2	2.4
3.6	7.2
8.4	6
4.2	4.8
10.8	5.4
5.4	4.2
9	6.6
13.8	3.6
4.2	9
2.4	4.8
3.6	3.6
2.4	3.6
4.8	1.2
1.2	3.6
3	3
4.8	7.8
6	6.6
4.2	4.2
7.2	5.4
6.6	4.2
4.2	3.6
14.4	3.6
3.6	4.2
7.8	4.2
6	6
2.4	4.8
11.4	4.2
6	3.6
2.4	7.8
6	4.2
3.6	3.6
4.8	1.8
3.6	6.6
5.4	2.4
5.4	3.6
7.8	3
7.2	2.4
4.2	9
4.8	4.8
3.6	1.8
4.2	3
3	4.8
1.8	3.6
3	4.2
4.2	3.6
3.6	4.2
2.4	4.2
4.8	7.2
18	3
6	6.6
10.2	4.8
7.2	5.4
6	11.4
2.4	3.6
8.4	3.6
2.4	4.2
2.4	6.6
6	6
1.8	5.4
3	2.4
4.8	4.2
11.4	4.2
2.4	4.2
7.2	4.8
3.6	4.2
7.8	4.8
6	6
0.6	3
2.4	1.8
4.8	5.4
7.2	5.4
3.6	3
6.6	7.2
5.4	2.4
6.6	4.2
7.2	3
7.2	7.2
9	5.4
7.8	2.4
3	5.4
1.8	3
0.6	3
6.6	4.8
1.8	3.6
1.8	6.6
11.4	7.2
1.2	4.2
2.4	4.8
3.6	3.6
7.2	3.6
5.4	3
7.8	7.8
5.4	7.2
7.8	3.6
9.6	6
7.8	1.8
3	0.6
9	3
7.8	7.8
0.6	4.8
10.2	5.4
4.2	6
4.8	4.2
5.4	6
3	4.2
4.8	6.6
6	1.2
9	9.6
6.6	3
5.4	6
7.8	5.4
1.8	6
5.4	4.8
6	3
4.2	4.2
7.2	2.4
4.8	7.2
11.4	6
4.8	3
4.8	1.2
13.8	6.6
13.8	9
5.4	4.2
15	8.4
3.6	3.6
8.4	6
	6
	3
	4.8
	4.2
	2.4
	6.6
	4.8
	4.8
	4.8
	5.4
	5.4
	5.4
	4.8
	6.6
	5.4
	7.8
	6
	6
	8.4
	3.6
	4.2
	7.2
	3
	3
	3
	6
	4.2
	3.6
	3.6
	2.4
	3.6
	3.6
	5.4
	3
	1.8
	3
	3.6
	3
	6
	9.6
	3.6
	9
	1.8
	10.2
	6
	5.4
	4.2
	5.4
	6.6
	4.8
	6.6
	10.8
	7.8
	6.6
	8.4
	2.4
	3
	3.6
	10.2
	8.4
	3.6
	15
	2.4
	8.4
	4.8
	2.4
	4.2
	3.6
	7.8
	7.2
	1.8
	3
	7.2
	4.8
	8.4
	3.6
	3.6
	3.6
	3
	5.4
	12.6
	11.4
	1.8
	8.4
	2.4
	4.2
	4.8
	9
	7.8
	11.4
	3.6
	2.4
	7.2
	8.4
	3
	5.4
	7.2
	10.8
	6
	7.2
	4.2
	6.6
	5.4
	14.4
	0
	1.2
	5.4
	3.6
	10.2
	13.8
	3.6
	10.2
	5.4
	5.4
	7.8
	8.4
	16.2
	7.2
	7.8
	6.6
	1.8
	4.8
	6
	4.8
	4.8
	6
	5.4
	6
	9
	10.2
	5.4
	9.6
	4.8
	6.6
	12
	3
	22.8
	5.4
	11.4
	5.4
	9.6
	4.8
	10.2
	3.6
	6
	4.8
	4.8
	13.2
	1.8
	11.4
	6.6
	7.2
	2.4
	4.2
	5.4
	10.2
	13.2
	9
	11.4
	2.4
	3.6
	5.4
	3.6
	10.2
	6
	5.4
	5.4
	6
	7.2
	7.2
	3.6
	3.6
	7.2
	4.8
	4.2
	3
	10.2
	7.8
	4.2
	6.6
	4.2
	1.2
	7.8
	10.8
	9
	12.6
	10.8
	10.2
	0.6
	9.6
	3.6
	4.8
	7.8
	10.8
	17.4
	3
	6

## Sheet: Fig 5D
3_WT_1Ca_ADP	4_KO_1Ca_ADP
21.3115	7.10797
18.7691	0.718361
18.6942	9.7103
3.92167	10.9404
16.6247	21.0558
0.561262	6.56175
4.01007	6.57975
3.07932	1.19549
13.7886	22.8821
4.55739	10.1756
3.49146	20.4617
14.6159	15.7284
3.43289	19.9929
0.394978	16.3669
4.62498	1.73493
1.63776	11.1318
3.43087	2.75651
0.529701	6.2286
4.39117	0.557565
3.34714	14.0791
20.9366	2.79672
3.45147	6.78222
15.6401	11.8371
10.9726	27.2085
6.27416	14.5146
0.840927	16.6323
21.4717	6.74842
4.8605	9.49192
1.78549	21.4319
10.9227	6.70548
66.0678	14.1406
10.0731	8.17992
6.36384	20.7805
4.30128	5.96442
8.47696	12.4785
19.6605	7.89928
16.2604	8.47117
18.8416	0.03016
5.05295	6.52103
17.7476	20.3664
11.1211	3.5175
6.68595	11.6721
3.34838	6.37306
11.8488	2.06511
13.0827	6.27872
3.68219	8.83986
2.50818	3.26228
0.28367	7.781
1.1731	7.87325
2.78918	16.6371
0.566374	8.93394
5.60009	11.0803
2.45825	4.55583
1.89562	23.5423
6.66299	0.834761
10.7445	11.1903
5.68874	4.47468
0.550281	7.52567
20.0868	8.87647
1.67743	2.31487
1.32383	17.1664
3.09609	19.4097
4.54257	7.24426
4.54814	5.03342
6.93358	15.0307
6.5361	10.2677
7.92099	8.65878
7.99768	18.2657
13.7136	8.9103
12.4182	2.22967
8.92105	12.5793
1.40686	3.05068
1.00841	1.49379
4.04531	13.591
16.5623	8.46008
4.96406	17.2569
6.18403	16.5471
7.52634	1.64565
47.1889	23.0583
17.0223	2.37838
17.0229	29.9713
17.8	8.3505
19.3812	3.48758
1.58783	7.56689
3.30723	9.48467
0.142359	9.07955
4.89705	20.0215
2.48608	7.56112
3.85775	11.6924
31.3675	11.8098
5.07899	4.34278
10.5568	9.75136
25.3316	6.78242
5.31437	13.8439
29.7281	7.70067
15.8939	14.4919
10.6599	8.64575
8.00757	6.15631
23.4053	8.35369
24.8357	0.569801
4.40658	5.3392
12.3303	4.34439
8.43332	14.3368
2.43289	12.5198
8.51176	9.68459
2.50792	16.537
1.59596	5.96483
13.2075	13.6135
31.1507	19.4675
4.19194	13.7015
8.32779	1.54169
3.8	7.6088
40.3962	19.2383
4.26766	4.36342
5.5001	12.6072
3.03874	8.61292
13.1783	14.4452
25.4225	24.0434
17.6037	0.835556
27.821	7.6532
3.52807	4.78112
30.9469	8.32455
13.3393	15.1845
9.47275	4.01964
26.2989	18.9784
14.7757	15.471
19.3098	9.00517
22.5648	27.8186
7.598	27.3975
28.4755	14.5271
	22.0984
	16.9244
	15.3147
	11.2288
	8.21083
	12.5777
	28.8027
	22.9732
	10.475
	27.0923
	21.2731
	9.52806
	14.3421
	16.4216
	14.6306
	16.9215
	11.4526
	2.28295
	12.8117
	12.0189
	8.48492
	5.77925
	7.71244
	18.1366
	17.5846
	6.35664
	16.1846
	7.50627
	8.71589
	14.9405
	5.26881
	7.73843
	9.2627
	11.1222
	5.46512
	15.8654
	21.2054
	9.19496
	6.47931
	11.3367
	11.8036
	14.7244
	9.16528
	3.63888
	13.3246
	16.2267
	10.2614
	6.30937
	4.99084
	22.7243
	9.48681
	6.30577
	23.3843
	3.80315
	2.20075
	5.28586
	5.4078
	10.0772
	21.3527
	10.1688
	9.08623
	26.9852
	11.7875
	24.7636
	17.0201
	8.64921
	17.6387
	13.6609
	12.2372
	24.6534
	4.85277
	5.1109
	19.2778
	10.6299
	4.07428
	28.2337
	3.76615
	3.63442
	4.05498
	7.62028
	19.6912
	8.57673
	6.05037
	30.1198
	7.71602
	22.2233
	32.1792
	9.00467
	29.0729
	21.3798
	11.4993
	8.79776
	22.4516
	38.99
	16.3497
	25.0842
	8.17881
	48.1052
	4.26852
	8.33449
	27.3459
	10.5526
	17.6869
	2.584
	0.731739
	11.4138
	26.38
	5.37748
	13.5075
	7.9298
	11.302
	40.8426
	4.73582
	9.13908
	31.8837
	5.57054
	18.7011
	22.1545
	25.0734
	23.1979
	17.3478
	9.26939
	18.2498
	34.3513
	23.4201
	6.35586
	9.50062
	10.4658
	28.7837
	15.365
	28.0825
	39.7893
	10.2101
	6.82663
	83.7562
	9.50753
	24.396
	21.2588
	60.2792
	22.0769
	16.7498
	29.5559
	14.522
	14.6765
	33.4732
	16.9963
	26.3908
	45.23
	4.20208
	21.0674
	11.8303
	21.5445
	7.56828
	7.24034
	8.81195
	29.5887
	47.2334
	25.827
	20.3619
	10.0391
	7.12141
	12.1535
	18.0538
	23.2791
	22.731
	34.8551
	20.0464
	39.1688
	32.4675
	10.0036
	20.6726
	22.6052
	31.2331
	20.9111
	5.7476
	17.8487
	9.64395
	9.88335
	15.5604
	35.3189
	22.7826
	0.347622
	11.8216
	3.66613
	7.89966
	49.633
	3.72362
	14.49
	1.47777
	36.7147
	36.1099
	38.0878
	31.6813
	72.9922
	83.038
	14.847
	22.2221

## Sheet: Fig 5E
3_WT_1Ca_ADP	4_KO_1Ca_ADP
0.134596	0.104083
0.273656	0.2115
0.327593	0.022114
0.543831	0.281298
0.062011	0.203676
0.409694	0.81223
0.01594	0.090629
0.047432	0.108474
0.072316	0.025008
0.126609	0.4206
0.081331	0.230033
0.038974	0.324298
0.103895	0.440158
0.078168	0.22469
0.01746	0.327143
0.125479	0.049399
0.075093	0.290584
0.076152	0.257124
0.037364	0.184937
0.159154	0.018955
0.071045	0.181922
0.35376	0.043482
0.08039	0.156996
0.216868	0.224463
0.159492	0.613805
0.152108	0.426637
0.005837	0.455094
0.609104	0.161984
0.064504	0.218091
0.029286	0.367993
0.412683	0.143542
0.585518	0.318198
0.166154	0.24514
0.291883	0.273827
0.069618	0.147336
0.22603	0.333132
0.388543	0.383473
0.428454	0.131134
0.364064	0.001252
0.097898	0.173476
0.228951	0.623433
0.152187	0.142686
0.150798	0.131019
0.07082	0.140093
0.312194	0.104646
0.299439	0.204349
0.125142	0.177617
0.12435	0.090888
0.010016	0.191776
0.029644	0.205089
0.073693	0.390573
0.026925	0.200393
0.116361	0.155482
0.013777	0.159599
0.031924	0.352276
0.066887	0.017456
0.143421	0.202787
0.092371	0.038702
0.025273	0.223936
0.243707	0.267305
0.067791	0.058362
0.056274	0.272028
0.049464	0.311118
0.297634	0.133973
0.141253	0.217455
0.150498	0.378752
0.057282	0.250269
0.314504	0.201651
0.111456	0.399879
0.361236	0.212335
0.156084	0.049531
0.152048	0.204878
0.329918	0.111214
0.038535	0.077046
0.087416	0.256441
0.230235	0.15997
0.14842	0.527285
0.090021	0.223642
0.132605	0.072903
0.693981	0.526775
0.230927	0.084524
0.239797	0.417257
0.201643	0.154168
0.241461	0.131277
0.053854	0.143407
0.20969	0.311793
0.04094	0.323182
0.075132	0.412202
0.136131	0.216116
0.218682	0.170421
0.268262	0.170462
0.425554	0.103158
0.466019	0.196902
0.754155	0.183847
0.07287	0.37613
0.560428	0.266995
0.21143	0.193151
0.195107	0.117768
0.106401	0.166478
0.245333	0.141175
0.324863	0.037797
0.13985	0.87573
0.134145	0.160274
0.106384	0.183078
0.409698	0.247489
0.082048	0.180411
0.056182	0.284207
0.034478	0.152899
0.24253	0.221285
0.987181	0.437474
0.088874	0.202124
0.133567	0.111674
0.040967	0.080124
0.624565	0.639796
0.081632	0.06957
0.071743	0.242519
0.198455	0.145315
0.236689	0.304295
0.422884	0.735751
0.419867	0.020508
0.396038	0.300509
0.075327	0.065159
0.273071	0.142488
0.270064	0.467135
0.195325	0.280239
0.192463	0.287392
0.105168	0.170273
0.37395	0.203704
0.150428	0.328626
0.221389	0.756555
0.328141	0.25111
	0.386084
	0.542463
	0.31658
	0.253305
	0.317519
	0.184208
	0.595898
	0.508599
	0.208104
	0.499425
	0.378349
	0.169793
	0.294824
	0.256158
	0.278961
	0.218975
	0.196971
	0.036751
	0.152056
	0.334495
	0.193347
	0.078349
	0.256901
	0.552095
	0.560321
	0.103461
	0.362975
	0.211595
	0.233715
	0.570801
	0.156155
	0.213637
	0.164847
	0.37094
	0.332348
	0.497114
	0.568655
	0.278861
	0.10843
	0.121174
	0.307282
	0.161636
	0.446118
	0.036209
	0.215257
	0.296694
	0.251127
	0.111226
	0.074528
	0.469947
	0.13863
	0.057822
	0.291889
	0.05879
	0.026482
	0.205458
	0.178135
	0.281909
	0.213683
	0.125193
	0.256535
	0.179358
	0.49626
	0.298805
	0.35629
	0.355023
	0.43222
	0.386021
	0.155956
	0.345852
	0.286026
	0.170068
	0.27201
	0.221801
	0.048613
	0.845573
	0.112914
	0.107597
	0.124055
	0.137264
	0.156912
	0.073547
	0.296144
	0.354999
	0.3586
	0.506251
	0.638281
	0.099333
	0.366721
	0.182852
	0.298426
	0.35491
	0.314536
	0.472678
	0.499875
	0.479072
	0.111543
	0.434803
	0.072558
	0.111234
	0.627214
	0.15422
	0.344681
	0.018282
	0.390198
	0.863956
	0.489855
	0.138473
	0.131612
	0.058085
	0.309451
	0.402204
	0.085586
	0.178453
	0.411163
	0.065582
	0.113671
	0.298947
	0.320733
	0.336579
	0.978218
	0.18867
	0.308495
	0.710028
	0.469106
	0.104154
	0.185876
	0.180494
	0.311737
	0.146944
	0.50809
	0.407689
	0.211222
	0.101911
	0.707168
	0.304386
	0.107975
	0.400723
	0.530846
	0.418574
	0.171946
	0.616107
	0.141857
	0.379578
	0.560057
	0.345142
	0.549963
	0.339487
	0.277363
	0.185922
	0.185595
	0.298354
	0.317817
	0.16254
	0.160834
	0.283437
	0.357735
	0.283819
	0.174851
	0.421093
	0.212069
	0.225268
	0.47156
	0.225726
	0.392994
	0.671339
	0.374839
	0.639153
	0.447864
	0.134639
	0.617747
	0.671455
	0.435342
	0.444317
	0.141717
	0.543716
	0.095297
	0.123764
	0.371382
	0.523289
	0.544969
	0.037768
	0.148025
	0.034461
	0.08732
	0.390427
	0.035423
	0.13953
	0.350796
	0.379181
	0.968356
	0.775558
	0.405967
	0.663432
	0.476288
	0.502152
	0.377695

## Sheet: Fig 5F
WT							KO
Frame	X	Y	Z	relative X	relative Y		Frame	X	Y	Z	relative X	relative Y
1	0	0	0	0	0		1	0	0	0	0	0
2	3.02441	-1.5535	0	3.02441	-1.5535		2	-1.68561	0.115051	0	-1.68561	0.115051
3	-0.610413	-1.18121	0	-0.610413	-1.18121		3	-0.765747	0.00674438	0	-0.765747	0.00674438
4	0.316467	-0.11026	0	0.316467	-0.11026		4	-0.424622	0.533905	0	-0.424622	0.533905
5	-0.571777	-0.0844727	0	-0.571777	-0.0844727		5	-0.727905	0.486908	0	-0.727905	0.486908
6	-2.36243	0.213684	0	-2.36243	0.213684		6	-1.65906	0.546722	0	-1.65906	0.546722
7	-1.7063	1.47971	0	-1.7063	1.47971		7	-0.621155	-0.13562	0	-0.621155	-0.13562
8	-3.23273	1.50726	0	-3.23273	1.50726		8	-1.38263	0.281281	0	-1.38263	0.281281
9	-1.2597	-1.50711	0	-1.2597	-1.50711		9	0.160522	-0.397247	0	0.160522	-0.397247
10	-1.92737	-0.885864	0	-1.92737	-0.885864		10	-0.772949	-0.287964	0	-0.772949	-0.287964
11	-2.68652	-1.5564	0	-2.68652	-1.5564		11	-2.92493	-0.161987	0	-2.92493	-0.161987
12	-3.87817	-1.35452	0	-3.87817	-1.35452		12	-1.51288	-0.879059	0	-1.51288	-0.879059
13	-6.36554	-0.0747681	0	-6.36554	-0.0747681		13	-1.01373	-0.704529	0	-1.01373	-0.704529
14	-7.93018	0.571777	0	-7.93018	0.571777		14	-1.55994	-1.20691	0	-1.55994	-1.20691
15	-7.56085	0.66629	0	-7.56085	0.66629		15	-4.41315	-0.488647	0	-4.41315	-0.488647
16	-6.76575	-0.374268	0	-6.76575	-0.374268		16	-2.16913	-0.960052	0	-2.16913	-0.960052
17	-9.74524	0.0263367	0	-9.74524	0.0263367		17	-2.24213	-0.610748	0	-2.24213	-0.610748
18	-10.1825	-0.387054	0	-10.1825	-0.387054		18	-1.28888	-0.841217	0	-1.28888	-0.841217
19	-9.96332	-0.151398	0	-9.96332	-0.151398		19	-2.47949	-0.834106	0	-2.47949	-0.834106
20	-10.7169	0.960968	0	-10.7169	0.960968		20	-1.63702	-1.01599	0	-1.63702	-1.01599
21	-10.8492	0.729004	0	-10.8492	0.729004		21	-2.3089	-0.753357	0	-2.3089	-0.753357
22	-10.3464	1.26114	0	-10.3464	1.26114		22	-1.50427	-0.890533	0	-1.50427	-0.890533
23	-10.2724	1.20636	0	-10.2724	1.20636		23	-2.06787	-1.27106	0	-2.06787	-1.27106
24	-10.9327	1.73718	0	-10.9327	1.73718		24	-2.29944	-1.4816	0	-2.29944	-1.4816
25	-11.5566	2.2244	0	-11.5566	2.2244		25	-1.78674	-1.52121	0	-1.78674	-1.52121
26	-11.6696	2.23532	0	-11.6696	2.23532		26	-1.33539	-1.55338	0	-1.33539	-1.55338
27	-11.9423	3.20346	0	-11.9423	3.20346		27	-0.283508	-1.51294	0	-0.283508	-1.51294
28	-10.7953	2.76367	0	-10.7953	2.76367		28	-0.492126	-1.52051	0	-0.492126	-1.52051
29	-11.8513	3.29443	0	-11.8513	3.29443		29	-1.38074	-1.68506	0	-1.38074	-1.68506
30	-11.8326	4.71194	0	-11.8326	4.71194		30	-1.2453	-1.94434	0	-1.2453	-1.94434
31	-10.9368	5.00562	0	-10.9368	5.00562		31	-1.14105	-1.76913	0	-1.14105	-1.76913
32	-11.2477	4.89023	0	-11.2477	4.89023		32	-1.33081	-1.98102	0	-1.33081	-1.98102
33	-10.5132	4.647	0	-10.5132	4.647		33	-1.29285	-2.24817	0	-1.29285	-2.24817
34	-10.4395	4.97525	0	-10.4395	4.97525		34	-0.8078	-2.15768	0	-0.8078	-2.15768
35	-10.4393	5.26019	0	-10.4393	5.26019		35	-0.518127	-2.05762	0	-0.518127	-2.05762
36	-10.3832	12.5687	0	-10.3832	12.5687		36	-0.140747	-2.56329	0	-0.140747	-2.56329
37	-10.0068	12.3408	0	-10.0068	12.3408		37	-1.06171	-2.5	0	-1.06171	-2.5
38	-10.1384	12.0115	0	-10.1384	12.0115		38	-0.396423	-2.2558	0	-0.396423	-2.2558
39	-10.1832	11.7329	0	-10.1832	11.7329		39	-0.393494	-2.1434	0	-0.393494	-2.1434
40	-10.4472	11.9939	0	-10.4472	11.9939		40	-0.179199	-2.19577	0	-0.179199	-2.19577
41	-10.1318	11.9779	0	-10.1318	11.9779		41	-1.4574	-2.03076	0	-1.4574	-2.03076
42	-9.85858	11.8377	0	-9.85858	11.8377		42	-1.0531	-1.4335	0	-1.0531	-1.4335
43	-10.0444	12.2048	0	-10.0444	12.2048		43	0.0949097	-1.79401	0	0.0949097	-1.79401
44	-10.2666	11.841	0	-10.2666	11.841		44	-0.0900269	-1.97479	0	-0.0900269	-1.97479
45	-10.1168	12.5656	0	-10.1168	12.5656		45	-1.3327	-1.61572	0	-1.3327	-1.61572
46	-9.67645	11.6038	0	-9.67645	11.6038		46	-0.908264	-2.07904	0	-0.908264	-2.07904
47	-9.87	12.1224	0	-9.87	12.1224		47	-0.788574	-1.49774	0	-0.788574	-1.49774
48	-9.50598	11.7403	0	-9.50598	11.7403		48	0.571472	-1.88327	0	0.571472	-1.88327
49	-9.49701	11.7206	0	-9.49701	11.7206		49	0.512268	-1.97131	0	0.512268	-1.97131
50	-7.17035	9.88889	0	-7.17035	9.88889		50	-0.00915527	-1.21609	0	-0.00915527	-1.21609
51	-7.69293	10.1196	0	-7.69293	10.1196		51	-0.155212	-0.845581	0	-0.155212	-0.845581
52	-7.69061	9.82959	0	-7.69061	9.82959		52	0.522766	-1.02533	0	0.522766	-1.02533
53	-10.5958	6.00006	0	-10.5958	6.00006		53	-0.471436	-0.756744	0	-0.471436	-0.756744
54	-6.73865	9.04422	0	-6.73865	9.04422		54	-0.692566	-0.527466	0	-0.692566	-0.527466
55	-7.20868	9.31433	0	-7.20868	9.31433		55	-1.35175	-0.304962	0	-1.35175	-0.304962
56	-6.50854	9.14804	0	-6.50854	9.14804		56	-1.77887	-0.288513	0	-1.77887	-0.288513
57	-6.51587	8.81213	0	-6.51587	8.81213		57	-0.98645	-0.0586853	0	-0.98645	-0.0586853
58	-6.93604	9.27054	0	-6.93604	9.27054		58	-0.97406	-0.348816	0	-0.97406	-0.348816
59	-6.41852	9.28033	0	-6.41852	9.28033		59	-0.84314	-0.33252	0	-0.84314	-0.33252
60	-4.40143	8.07367	0	-4.40143	8.07367		60	-1.68976	-0.428436	0	-1.68976	-0.428436
61	-4.37524	8.2117	0	-4.37524	8.2117		61	-1.9071	-0.478577	0	-1.9071	-0.478577
62	-4.87482	7.92209	0	-4.87482	7.92209		62	-2.73688	-0.0686035	0	-2.73688	-0.0686035
63	-4.56641	8.25757	0	-4.56641	8.25757		63	-2.20081	-0.595825	0	-2.20081	-0.595825
64	-9.52277	11.7787	0	-9.52277	11.7787		64	-2.26453	-0.585571	0	-2.26453	-0.585571
65	-4.94025	8.51373	0	-4.94025	8.51373		65	-2.59601	-0.521545	0	-2.59601	-0.521545
66	-4.78717	7.7742	0	-4.78717	7.7742		66	-2.38367	-0.0260315	0	-2.38367	-0.0260315
67	-4.54956	7.92615	0	-4.54956	7.92615		67	-3.17511	0.21524	0	-3.17511	0.21524
68	-4.44409	8.41257	0	-4.44409	8.41257		68	-3.08313	0.565125	0	-3.08313	0.565125
69	-3.58997	8.30737	0	-3.58997	8.30737		69	-4.06586	0.989532	0	-4.06586	0.989532
70	-3.27698	8.34503	0	-3.27698	8.34503		70	-3.7973	1.01358	0	-3.7973	1.01358
71	-4.17633	8.49219	0	-4.17633	8.49219		71	-4.00397	0.925171	0	-4.00397	0.925171
72	-3.71985	8.37161	0	-3.71985	8.37161		72	-5.25409	1.0925	0	-5.25409	1.0925
73	-6.77808	10.3201	0	-6.77808	10.3201		73	-3.84546	0.87384	0	-3.84546	0.87384
74	-9.22211	12.3911	0	-9.22211	12.3911		74	-5.19849	0.216949	0	-5.19849	0.216949
75	-9.01923	13.2349	0	-9.01923	13.2349		75	-5.54004	0.32962	0	-5.54004	0.32962
76	-9.52496	13.8906	0	-9.52496	13.8906		76	-5.25702	-0.57486	0	-5.25702	-0.57486
78	-6.24591	12.1003	0	-6.24591	12.1003		77	-5.40082	-0.951019	0	-5.40082	-0.951019
81	-9.09357	8.02597	0	-9.09357	8.02597		78	-5.71759	-1.67355	0	-5.71759	-1.67355
82	-3.07001	8.06088	0	-3.07001	8.06088		79	-6.19812	-1.63901	0	-6.19812	-1.63901
1	0	0	0	0	0		80	-6.47144	-1.7012	0	-6.47144	-1.7012
2	4.5011	2.40646	0	4.5011	2.40646		81	-7.36005	-2.35608	0	-7.36005	-2.35608
3	0.443237	0.204407	0	0.443237	0.204407		82	-6.99689	-2.45847	0	-6.99689	-2.45847
4	0.0975952	-0.277771	0	0.0975952	-0.277771		83	-8.38251	-2.73636	0	-8.38251	-2.73636
5	-0.0633545	-0.326019	0	-0.0633545	-0.326019		84	-8.00092	-2.1698	0	-8.00092	-2.1698
6	-0.0579224	0.37973	0	-0.0579224	0.37973		85	-8.11658	-2.11197	0	-8.11658	-2.11197
7	-0.399963	-0.467163	0	-0.399963	-0.467163		86	-9.71008	-2.03421	0	-9.71008	-2.03421
8	-0.349854	0.00753784	0	-0.349854	0.00753784		87	-10.2946	-1.75024	0	-10.2946	-1.75024
9	-0.235657	-0.562408	0	-0.235657	-0.562408		88	-9.9834	-1.73358	0	-9.9834	-1.73358
10	-0.0876465	-7.5025	0	-0.0876465	-7.5025		89	-11.0732	-1.08527	0	-11.0732	-1.08527
11	-0.832275	-0.437164	0	-0.832275	-0.437164		90	-10.725	-0.160309	0	-10.725	-0.160309
12	-0.990173	-0.046875	0	-0.990173	-0.046875		91	-11.4844	0.052002	0	-11.4844	0.052002
13	-1.52917	-0.227386	0	-1.52917	-0.227386		92	-12.6221	0.120453	0	-12.6221	0.120453
14	-1.79352	-0.412537	0	-1.79352	-0.412537		93	-12.9955	0.299988	0	-12.9955	0.299988
15	-1.09845	-0.319885	0	-1.09845	-0.319885		94	-13.4664	-0.195831	0	-13.4664	-0.195831
16	-1.58795	-0.265442	0	-1.58795	-0.265442		95	-14.3993	0.263824	0	-14.3993	0.263824
17	-1.38806	-0.137207	0	-1.38806	-0.137207		96	-14.3774	0.513275	0	-14.3774	0.513275
18	-1.50165	-0.098175	0	-1.50165	-0.098175		97	-14.8718	0.360382	0	-14.8718	0.360382
19	-1.37646	-0.729858	0	-1.37646	-0.729858		98	-16.1982	-0.876648	0	-16.1982	-0.876648
20	-1.2558	-0.559174	0	-1.2558	-0.559174		99	-16.5001	-0.199493	0	-16.5001	-0.199493
21	-1.47668	-0.974792	0	-1.47668	-0.974792		100	-16.5435	0.1716	0	-16.5435	0.1716
22	-1.30426	-1.26938	0	-1.30426	-1.26938		101	-17.4874	-0.122162	0	-17.4874	-0.122162
23	-1.12952	-0.940063	0	-1.12952	-0.940063		102	-16.8026	-1.1279	0	-16.8026	-1.1279
24	-0.503601	-0.668884	0	-0.503601	-0.668884		103	-17.0583	-0.302887	0	-17.0583	-0.302887
26	-1.35809	-0.168091	0	-1.35809	-0.168091		104	-17.1615	-0.303101	0	-17.1615	-0.303101
27	-0.818726	-0.241364	0	-0.818726	-0.241364		105	-17.0024	-1.76846	0	-17.0024	-1.76846
28	-1.08557	0.766479	0	-1.08557	0.766479		106	-17.006	-1.56689	0	-17.006	-1.56689
30	-0.784058	1.62039	0	-0.784058	1.62039		107	-16.4294	-1.57947	0	-16.4294	-1.57947
31	-1.43408	1.28726	0	-1.43408	1.28726		108	-16.1649	-2.47067	0	-16.1649	-2.47067
34	-0.975281	1.77094	0	-0.975281	1.77094		109	-15.8461	-2.50513	0	-15.8461	-2.50513
35	0.14978	1.75031	0	0.14978	1.75031		110	-16.577	-2.03345	0	-16.577	-2.03345
37	0.66217	2.7699	0	0.66217	2.7699		111	-16.869	-1.80875	0	-16.869	-1.80875
38	-0.71344	2.14804	0	-0.71344	2.14804		112	-16.7711	-1.60852	0	-16.7711	-1.60852
39	-0.279663	2.297	0	-0.279663	2.297		113	-16.9732	-2.00275	0	-16.9732	-2.00275
41	-1.9433	1.43854	0	-1.9433	1.43854		114	-16.8544	-2.45956	0	-16.8544	-2.45956
42	-1.51349	1.6539	0	-1.51349	1.6539		115	-16.0723	-2.60037	0	-16.0723	-2.60037
43	-1.98743	2.03226	0	-1.98743	2.03226		116	-16.1196	-2.11505	0	-16.1196	-2.11505
44	-0.337341	2.03296	0	-0.337341	2.03296		117	-15.837	-1.65054	0	-15.837	-1.65054
46	-1.52362	1.93137	0	-1.52362	1.93137		118	-16.4025	-0.944183	0	-16.4025	-0.944183
47	-1.77551	2.37952	0	-1.77551	2.37952		119	-15.3727	-1.13641	0	-15.3727	-1.13641
50	0.20575	2.50818	0	0.20575	2.50818		120	-16.0738	-0.634674	0	-16.0738	-0.634674
54	1.04962	4.05988	0	1.04962	4.05988		121	-16.7631	-1.1619	0	-16.7631	-1.1619
55	-2.35773	2.40332	0	-2.35773	2.40332		122	-15.0582	-0.65741	0	-15.0582	-0.65741
56	-1.49908	2.53592	0	-1.49908	2.53592		123	-15.95	-0.799316	0	-15.95	-0.799316
59	-0.435486	3.26501	0	-0.435486	3.26501		124	-18.4141	-0.688507	0	-18.4141	-0.688507
60	-2.00104	3.05402	0	-2.00104	3.05402		125	-18.5374	-2.0163	0	-18.5374	-2.0163
61	-0.143188	3.159	0	-0.143188	3.159		126	-18.323	-2.405	0	-18.323	-2.405
62	0.591858	3.80414	0	0.591858	3.80414		127	-18.6907	-3.51187	0	-18.6907	-3.51187
64	-1.51831	2.44547	0	-1.51831	2.44547		128	-18.7252	-4.37387	0	-18.7252	-4.37387
65	-1.79871	2.64667	0	-1.79871	2.64667		129	-20.7652	-8.72705	0	-20.7652	-8.72705
67	-0.684631	3.08429	0	-0.684631	3.08429		130	-18.8237	-5.43173	0	-18.8237	-5.43173
68	-1.87604	3.01157	0	-1.87604	3.01157		131	-18.3179	-5.30722	0	-18.3179	-5.30722
69	-1.21771	3.15472	0	-1.21771	3.15472		132	-18.3929	-5.75052	0	-18.3929	-5.75052
70	1.78876	4.89005	0	1.78876	4.89005		133	-18.9387	-4.71219	0	-18.9387	-4.71219
71	-1.60699	3.64584	0	-1.60699	3.64584		134	-19.7582	-4.61429	0	-19.7582	-4.61429
73	-0.785095	3.3988	0	-0.785095	3.3988		135	-20.6545	-3.9465	0	-20.6545	-3.9465
74	-0.811279	3.4288	0	-0.811279	3.4288		136	-20.8644	-4.35739	0	-20.8644	-4.35739
75	-1.00201	3.18243	0	-1.00201	3.18243		137	-21.6804	-3.57059	0	-21.6804	-3.57059
76	-1.20447	3.53027	0	-1.20447	3.53027		138	-22.0375	-3.14706	0	-22.0375	-3.14706
78	-1.29272	3.14883	0	-1.29272	3.14883		1	0	0	0	0	0
80	-1.23315	3.30432	0	-1.23315	3.30432		2	-0.200653	-0.0622559	0	-0.200653	-0.0622559
81	-0.551453	-3.20279	0	-0.551453	-3.20279		3	-0.146912	-0.0303345	0	-0.146912	-0.0303345
82	-0.838684	-2.40021	0	-0.838684	-2.40021		4	-0.003479	-0.195374	0	-0.003479	-0.195374
87	-0.50708	-4.7608	0	-0.50708	-4.7608		5	0.143372	-0.315247	0	0.143372	-0.315247
88	-4.03217	-14.308	0	-4.03217	-14.308		6	0.0369263	-0.281555	0	0.0369263	-0.281555
89	-1.17401	-4.82843	0	-1.17401	-4.82843		7	0.013031	-0.38031	0	0.013031	-0.38031
90	-1.20789	-4.77536	0	-1.20789	-4.77536		8	0.28595	-0.192566	0	0.28595	-0.192566
91	-0.673279	-4.05646	0	-0.673279	-4.05646		9	0.39447	-0.398438	0	0.39447	-0.398438
92	-1.13403	-3.3519	0	-1.13403	-3.3519		10	0.383911	-0.516846	0	0.383911	-0.516846
93	-1.53448	-3.93488	0	-1.53448	-3.93488		11	0.739594	-0.708496	0	0.739594	-0.708496
94	-1.5744	-3.74704	0	-1.5744	-3.74704		12	0.158997	-0.920593	0	0.158997	-0.920593
95	-1.52905	-4.39902	0	-1.52905	-4.39902		13	-0.0541077	-0.540161	0	-0.0541077	-0.540161
97	-2.19476	-4.70969	0	-2.19476	-4.70969		14	-0.248627	-0.532837	0	-0.248627	-0.532837
98	-4.14355	-14.3297	0	-4.14355	-14.3297		15	-0.330566	-0.240662	0	-0.330566	-0.240662
99	-2.26147	-4.45505	0	-2.26147	-4.45505		16	-0.458527	-0.492554	0	-0.458527	-0.492554
101	-7.69385	-14.4278	0	-7.69385	-14.4278		17	-6.21698	3.60504	0	-6.21698	3.60504
102	-5.9032	-16.0402	0	-5.9032	-16.0402		18	-0.987091	0.0582886	0	-0.987091	0.0582886
103	-5.15112	-16.1581	0	-5.15112	-16.1581		19	-0.811401	-0.499207	0	-0.811401	-0.499207
104	-4.48773	-16.2449	0	-4.48773	-16.2449		20	-7.84509	3.80463	0	-7.84509	3.80463
105	-4.01172	-15.9952	0	-4.01172	-15.9952		21	-8.10468	4.38525	0	-8.10468	4.38525
106	-1.60669	-4.04761	0	-1.60669	-4.04761		22	-1.83978	-0.979675	0	-1.83978	-0.979675
107	-4.2254	-16.3384	0	-4.2254	-16.3384		23	-1.77368	-1.48669	0	-1.77368	-1.48669
108	-1.03503	-4.06967	0	-1.03503	-4.06967		24	-9.96014	3.26471	0	-9.96014	3.26471
109	-1.4765	-16.708	0	-1.4765	-16.708		25	-9.17392	2.81702	0	-9.17392	2.81702
110	-0.414307	-4.61816	0	-0.414307	-4.61816		26	-8.37381	3.75677	0	-8.37381	3.75677
111	1.31598	-3.0304	0	1.31598	-3.0304		27	-8.80188	4.01807	0	-8.80188	4.01807
1	0	0	0	0	0		28	-3.95621	1.7937	0	-3.95621	1.7937
2	-1.2135	0.688477	0	-1.2135	0.688477		29	-4.08707	2.05975	0	-4.08707	2.05975
3	0.25238	-0.282471	0	0.25238	-0.282471		30	-8.70312	3.61682	0	-8.70312	3.61682
4	0.0984497	-0.472839	0	0.0984497	-0.472839		31	-7.75705	3.43372	0	-7.75705	3.43372
5	0.710449	-1.0412	0	0.710449	-1.0412		32	-1.97876	-0.691162	0	-1.97876	-0.691162
6	-1.23785	0.545349	0	-1.23785	0.545349		33	-5.73444	0.47876	0	-5.73444	0.47876
7	-0.545471	-1.07233	0	-0.545471	-1.07233		34	-9.04968	4.78265	0	-9.04968	4.78265
8	-0.997253	-1.18097	0	-0.997253	-1.18097		35	-3.22122	-0.729614	0	-3.22122	-0.729614
9	-1.04993	-0.600403	0	-1.04993	-0.600403		36	-4.71112	2.55426	0	-4.71112	2.55426
10	-0.0494995	-1.38928	0	-0.0494995	-1.38928		37	-3.64972	-0.191284	0	-3.64972	-0.191284
11	-2.35703	-0.822021	0	-2.35703	-0.822021		38	-3.58133	-0.28479	0	-3.58133	-0.28479
12	-2.37149	-1.76892	0	-2.37149	-1.76892		39	-4.04443	-0.691162	0	-4.04443	-0.691162
13	-1.98618	-1.69806	0	-1.98618	-1.69806		40	-4.52817	-0.178528	0	-4.52817	-0.178528
14	-2.44434	-2.18433	0	-2.44434	-2.18433		41	-4.52396	-0.598389	0	-4.52396	-0.598389
15	-1.83044	-3.27271	0	-1.83044	-3.27271		42	-4.04327	-0.963257	0	-4.04327	-0.963257
16	-2.05298	-3.78876	0	-2.05298	-3.78876		43	-3.99384	-1.56989	0	-3.99384	-1.56989
17	-2.79269	-4.53265	0	-2.79269	-4.53265		44	-4.89349	2.10376	0	-4.89349	2.10376
18	-2.90793	-4.4704	0	-2.90793	-4.4704		45	-3.9158	-1.01331	0	-3.9158	-1.01331
19	-3.26767	-4.28845	0	-3.26767	-4.28845		46	-4.0657	-1.16321	0	-4.0657	-1.16321
20	-2.99973	-4.34851	0	-2.99973	-4.34851		47	-5.25784	1.73499	0	-5.25784	1.73499
21	-3.37018	-4.37793	0	-3.37018	-4.37793		48	1.71017	-5.43225	0	1.71017	-5.43225
22	-3.36197	-4.22919	0	-3.36197	-4.22919		49	-3.93738	-1.12274	0	-3.93738	-1.12274
23	-3.12332	-3.76721	0	-3.12332	-3.76721		50	-1.39194	-3.008	0	-1.39194	-3.008
24	-3.96573	-3.33575	0	-3.96573	-3.33575		51	2.23944	-5.78326	0	2.23944	-5.78326
25	-3.82516	-3.77252	0	-3.82516	-3.77252		52	2.23767	-5.61554	0	2.23767	-5.61554
26	-4.32822	-4.07178	0	-4.32822	-4.07178		53	4.78	-8.62524	0	4.78	-8.62524
27	-4.09491	-4.56372	0	-4.09491	-4.56372		54	-0.414124	-3.45856	0	-0.414124	-3.45856
28	-4.13474	-4.11053	0	-4.13474	-4.11053		55	0.965149	-4.57751	0	0.965149	-4.57751
29	-4.90012	-4.75031	0	-4.90012	-4.75031		56	0.593536	-3.93768	0	0.593536	-3.93768
30	-5.23297	-5.2746	0	-5.23297	-5.2746		57	0.496582	-3.73547	0	0.496582	-3.73547
31	-5.31812	-4.6861	0	-5.31812	-4.6861		58	2.07114	-5.86108	0	2.07114	-5.86108
32	-5.62973	-5.48254	0	-5.62973	-5.48254		59	1.63531	-5.54895	0	1.63531	-5.54895
33	-5.8183	-6.0625	0	-5.8183	-6.0625		60	1.29474	-4.64075	0	1.29474	-4.64075
34	-5.76068	-5.78198	0	-5.76068	-5.78198		61	1.11707	-5.04907	0	1.11707	-5.04907
35	-6.13879	-5.92957	0	-6.13879	-5.92957		62	1.60037	-4.87897	0	1.60037	-4.87897
36	-6.009	-6.68597	0	-6.009	-6.68597		63	8.22604	-3.71283	0	8.22604	-3.71283
37	-5.74988	-6.7121	0	-5.74988	-6.7121		64	2.39337	-5.70392	0	2.39337	-5.70392
38	-5.90875	-6.70624	0	-5.90875	-6.70624		65	1.79752	-5.15564	0	1.79752	-5.15564
39	-5.52359	-6.38593	0	-5.52359	-6.38593		66	2.55914	-5.33875	0	2.55914	-5.33875
40	-6.80411	-6.73779	0	-6.80411	-6.73779		67	-3.19678	-1.26135	0	-3.19678	-1.26135
41	-6.32938	-6.70258	0	-6.32938	-6.70258		68	0.539764	-4.47266	0	0.539764	-4.47266
42	-6.5575	-6.79218	0	-6.5575	-6.79218		69	0.295868	-4.67383	0	0.295868	-4.67383
43	-6.70081	-6.73431	0	-6.70081	-6.73431		70	0.9711	-5.68127	0	0.9711	-5.68127
44	-6.43604	-6.61896	0	-6.43604	-6.61896		71	1.33911	-5.46771	0	1.33911	-5.46771
45	-6.8952	-7.5589	0	-6.8952	-7.5589		72	-3.19559	-2.37714	0	-3.19559	-2.37714
46	-6.40546	-7.78839	0	-6.40546	-7.78839		73	2.39252	-7.21924	0	2.39252	-7.21924
47	-5.93539	-7.27753	0	-5.93539	-7.27753		74	-3.84192	-2.57727	0	-3.84192	-2.57727
48	-6.29694	-7.19922	0	-6.29694	-7.19922		75	1.82355	-7.07428	0	1.82355	-7.07428
49	-6.04141	-7.9621	0	-6.04141	-7.9621		76	1.54391	-6.64417	0	1.54391	-6.64417
50	-5.47363	-7.34717	0	-5.47363	-7.34717		77	-0.443054	-5.0697	0	-0.443054	-5.0697
51	-5.28485	-8.07916	0	-5.28485	-8.07916		78	-0.823761	-5.40521	0	-0.823761	-5.40521
52	-5.09738	-8.3941	0	-5.09738	-8.3941		79	1.81381	-7.47443	0	1.81381	-7.47443
53	-5.17682	-7.72614	0	-5.17682	-7.72614		80	2.03955	-7.28589	0	2.03955	-7.28589
54	-5.52429	-8.07739	0	-5.52429	-8.07739		81	1.80475	-7.54041	0	1.80475	-7.54041
55	-5.47559	-8.84625	0	-5.47559	-8.84625		82	1.75058	-7.26941	0	1.75058	-7.26941
56	-5.0553	-9.26758	0	-5.0553	-9.26758		83	1.69797	-7.58698	0	1.69797	-7.58698
57	-5.21216	-8.90399	0	-5.21216	-8.90399		84	1.09128	-6.27051	0	1.09128	-6.27051
58	-5.18616	-9.07947	0	-5.18616	-9.07947		85	2.13522	-7.01312	0	2.13522	-7.01312
59	-5.19507	-9.40045	0	-5.19507	-9.40045		86	1.98169	-6.80273	0	1.98169	-6.80273
60	-5.22028	-10.1184	0	-5.22028	-10.1184		87	1.42212	-7.03314	0	1.42212	-7.03314
61	-4.81268	-10.1605	0	-4.81268	-10.1605		88	2.36276	-8.53766	0	2.36276	-8.53766
62	-5.185	-10.89	0	-5.185	-10.89		89	2.14029	-8.21277	0	2.14029	-8.21277
63	-4.93991	-10.1707	0	-4.93991	-10.1707		90	1.76813	-8.21558	0	1.76813	-8.21558
64	-4.92316	-10.9128	0	-4.92316	-10.9128		91	1.4472	-7.93433	0	1.4472	-7.93433
65	-4.96512	-11.0421	0	-4.96512	-11.0421		92	1.68146	-8.16296	0	1.68146	-8.16296
66	-5.09235	-10.5023	0	-5.09235	-10.5023		93	1.12363	-7.85272	0	1.12363	-7.85272
67	-5.48706	-10.973	0	-5.48706	-10.973		94	1.64102	-8.36627	0	1.64102	-8.36627
68	-5.63239	-10.4224	0	-5.63239	-10.4224		95	2.05371	-8.93964	0	2.05371	-8.93964
69	-5.4762	-10.7125	0	-5.4762	-10.7125		96	2.54919	-9.44891	0	2.54919	-9.44891
70	-5.68597	-11.2114	0	-5.68597	-11.2114		97	1.90927	-9.64691	0	1.90927	-9.64691
71	-5.73349	-11.172	0	-5.73349	-11.172		98	0.966522	-8.9339	0	0.966522	-8.9339
72	-4.80396	-10.9973	0	-4.80396	-10.9973		99	0.184784	-7.49719	0	0.184784	-7.49719
73	-5.46457	-11.3362	0	-5.46457	-11.3362		100	0.934875	-7.69073	0	0.934875	-7.69073
74	-5.2713	-11.9862	0	-5.2713	-11.9862		101	1.42276	-8.48065	0	1.42276	-8.48065
75	-4.94171	-11.5934	0	-4.94171	-11.5934		102	1.93866	-8.80774	0	1.93866	-8.80774
76	-5.17664	-12.4808	0	-5.17664	-12.4808		103	2.00089	-8.98749	0	2.00089	-8.98749
77	-4.35016	-12.2504	0	-4.35016	-12.2504		104	2.07877	-8.28137	0	2.07877	-8.28137
78	-4.11569	-12.8638	0	-4.11569	-12.8638		105	3.09235	-9.4942	0	3.09235	-9.4942
79	-4.00107	-13.078	0	-4.00107	-13.078		111	11.8535	-8.32159	0	11.8535	-8.32159
80	-4.13248	-13.1156	0	-4.13248	-13.1156		112	3.02121	-6.80591	0	3.02121	-6.80591
81	-4.71829	-14.7272	0	-4.71829	-14.7272		113	5.19485	-4.62946	0	5.19485	-4.62946
82	-4.41895	-14.3792	0	-4.41895	-14.3792		114	0.29248	-7.06342	0	0.29248	-7.06342
83	-4.78897	-15.7014	0	-4.78897	-15.7014		115	-2.60464	-5.11407	0	-2.60464	-5.11407
84	-3.92041	-14.6605	0	-3.92041	-14.6605		116	1.3317	-8.31348	0	1.3317	-8.31348
85	-3.58221	-14.7872	0	-3.58221	-14.7872		117	2.08463	-8.7666	0	2.08463	-8.7666
86	-3.60477	-15.4529	0	-3.60477	-15.4529		118	-5.4635	-6.38025	0	-5.4635	-6.38025
87	-3.61224	-15.3198	0	-3.61224	-15.3198		119	-4.69693	-5.87866	0	-4.69693	-5.87866
88	-3.47284	-14.9477	0	-3.47284	-14.9477		120	-1.25531	-5.41266	0	-1.25531	-5.41266
89	-3.47186	-13.634	0	-3.47186	-13.634		121	-2.13297	-4.42456	0	-2.13297	-4.42456
90	-3.10229	-14.1002	0	-3.10229	-14.1002		122	-3.85272	-2.84912	0	-3.85272	-2.84912
91	-3.61725	-14.4782	0	-3.61725	-14.4782		123	-4.74692	-1.93268	0	-4.74692	-1.93268
92	-3.73941	-15.3945	0	-3.73941	-15.3945		124	-3.63577	-1.97101	0	-3.63577	-1.97101
93	-3.71829	-15.6894	0	-3.71829	-15.6894		125	-2.03656	0.979858	0	-2.03656	0.979858
94	-4.06067	-14.6975	0	-4.06067	-14.6975		126	-2.16501	-0.902771	0	-2.16501	-0.902771
95	-3.90311	-16.075	0	-3.90311	-16.075		127	-2.08994	-3.93958	0	-2.08994	-3.93958
96	-4.3367	-15.5245	0	-4.3367	-15.5245		128	2.59772	-7.02606	0	2.59772	-7.02606
97	-4.22879	-16.6133	0	-4.22879	-16.6133		129	-1.30371	-4.25537	0	-1.30371	-4.25537
98	-3.26105	-16.7384	0	-3.26105	-16.7384		130	-0.32782	-1.57343	0	-0.32782	-1.57343
99	-2.81183	-15.6024	0	-2.81183	-15.6024		131	1.70651	-4.0177	0	1.70651	-4.0177
100	-1.87491	-16.1761	0	-1.87491	-16.1761		132	-2.99554	-4.76141	0	-2.99554	-4.76141
101	-2.31631	-15.4315	0	-2.31631	-15.4315		133	7.41748	-10.9807	0	7.41748	-10.9807
102	-2.17206	-15.1833	0	-2.17206	-15.1833		134	2.76596	-10.771	0	2.76596	-10.771
103	-1.89856	-16.0317	0	-1.89856	-16.0317		135	3.24844	-11.6161	0	3.24844	-11.6161
104	-1.84106	-16.3676	0	-1.84106	-16.3676		136	4.26135	-10.5888	0	4.26135	-10.5888
105	-1.36322	-15.0393	0	-1.36322	-15.0393		137	2.18524	-7.19	0	2.18524	-7.19
106	-1.02884	-16.3303	0	-1.02884	-16.3303		138	3.1683	-11.5198	0	3.1683	-11.5198
107	0.522858	-16.8163	0	0.522858	-16.8163		1	0	0	0	0	0
108	-0.080658	-15.6343	0	-0.080658	-15.6343		2	-0.202393	-0.423126	0	-0.202393	-0.423126
109	0.596405	-16.4835	0	0.596405	-16.4835		3	-0.320129	0.0376587	0	-0.320129	0.0376587
110	-0.113525	-16.1819	0	-0.113525	-16.1819		4	-0.384216	0.824036	0	-0.384216	0.824036
111	0.440948	-16.1307	0	0.440948	-16.1307		5	-0.477234	0.603638	0	-0.477234	0.603638
112	1.43164	-16.8351	0	1.43164	-16.8351		6	-0.573914	1.02661	0	-0.573914	1.02661
113	1.36438	-17.722	0	1.36438	-17.722		7	-0.671021	1.13443	0	-0.671021	1.13443
114	1.72507	-17.3284	0	1.72507	-17.3284		8	-1.77869	1.6163	0	-1.77869	1.6163
115	2.22144	-17.7728	0	2.22144	-17.7728		9	-1.84326	1.58405	0	-1.84326	1.58405
116	2.84241	-17.1117	0	2.84241	-17.1117		10	-2.23389	1.74622	0	-2.23389	1.74622
117	2.89096	-17.5214	0	2.89096	-17.5214		11	-2.15479	1.40576	0	-2.15479	1.40576
118	2.96515	-16.6432	0	2.96515	-16.6432		12	-2.45905	0.844025	0	-2.45905	0.844025
119	2.94388	-17.1006	0	2.94388	-17.1006		13	-1.90857	1.60922	0	-1.90857	1.60922
120	3.21613	-17.8491	0	3.21613	-17.8491		14	-1.9729	1.18677	0	-1.9729	1.18677
121	2.97626	-18.9943	0	2.97626	-18.9943		15	-1.45911	2.04395	0	-1.45911	2.04395
122	4.29114	-17.7935	0	4.29114	-17.7935		16	-1.82068	1.117	0	-1.82068	1.117
123	3.60208	-17.9308	0	3.60208	-17.9308		17	-1.43713	1.74918	0	-1.43713	1.74918
124	3.54453	-16.4064	0	3.54453	-16.4064		18	-1.34454	1.86575	0	-1.34454	1.86575
125	3.76956	-17.3347	0	3.76956	-17.3347		19	-1.86218	2.06833	0	-1.86218	2.06833
126	4.1181	-17.7838	0	4.1181	-17.7838		20	-2.11688	1.44336	0	-2.11688	1.44336
127	4.39993	-16.8273	0	4.39993	-16.8273		21	-1.6308	1.10135	0	-1.6308	1.10135
128	4.87448	-17.9472	0	4.87448	-17.9472		22	-1.87689	1.63736	0	-1.87689	1.63736
129	5.21512	-17.4678	0	5.21512	-17.4678		23	-1.7475	1.04556	0	-1.7475	1.04556
130	5.57196	-17.8784	0	5.57196	-17.8784		24	-1.69012	1.74951	0	-1.69012	1.74951
131	4.75519	-17.6763	0	4.75519	-17.6763		25	-1.87036	1.49472	0	-1.87036	1.49472
132	4.27591	-17.6168	0	4.27591	-17.6168		26	-2.18561	1.32376	0	-2.18561	1.32376
133	4.69272	-18.6418	0	4.69272	-18.6418		27	-2.27832	1.923	0	-2.27832	1.923
134	3.90353	-18.6759	0	3.90353	-18.6759		28	-1.85223	1.6178	0	-1.85223	1.6178
135	4.13751	-18.5751	0	4.13751	-18.5751		29	-1.91785	2.24313	0	-1.91785	2.24313
136	4.40323	-18.8901	0	4.40323	-18.8901		30	-1.84668	1.74088	0	-1.84668	1.74088
1	0	0	0	0	0		31	-1.2821	1.68402	0	-1.2821	1.68402
2	0.506592	-0.351318	0	0.506592	-0.351318		32	-1.1665	0.748566	0	-1.1665	0.748566
3	0.343628	0.176941	0	0.343628	0.176941		33	-1.09448	1.07077	0	-1.09448	1.07077
4	1.13553	-0.227295	0	1.13553	-0.227295		34	-1.07782	0.895599	0	-1.07782	0.895599
5	0.926422	-0.226501	0	0.926422	-0.226501		35	-1.56024	1.35809	0	-1.56024	1.35809
6	1.67047	-0.80719	0	1.67047	-0.80719		36	-1.7616	1.44824	0	-1.7616	1.44824
7	1.88055	-1.24768	0	1.88055	-1.24768		37	-1.6109	1.84607	0	-1.6109	1.84607
8	2.2128	-1.8443	0	2.2128	-1.8443		38	-1.20819	1.2168	0	-1.20819	1.2168
9	3.24811	-2.18347	0	3.24811	-2.18347		39	-1.38647	2.27203	0	-1.38647	2.27203
10	2.35477	-1.2757	0	2.35477	-1.2757		40	-1.10284	1.61301	0	-1.10284	1.61301
11	1.97321	-1.43732	0	1.97321	-1.43732		41	-0.714172	1.48166	0	-0.714172	1.48166
12	-2.96329	1.948	0	-2.96329	1.948		42	-0.420715	2.479	0	-0.420715	2.479
13	-1.72382	1.15057	0	-1.72382	1.15057		43	0.230347	1.3551	0	0.230347	1.3551
14	-1.34396	1.03345	0	-1.34396	1.03345		44	0.150452	1.73257	0	0.150452	1.73257
15	-0.90863	-0.0619507	0	-0.90863	-0.0619507		45	-0.774841	2.00485	0	-0.774841	2.00485
16	2.1886	-3.12213	0	2.1886	-3.12213		46	-0.137878	1.68655	0	-0.137878	1.68655
17	1.86459	-2.95099	0	1.86459	-2.95099		47	0.198608	1.08011	0	0.198608	1.08011
18	1.89621	-3.38654	0	1.89621	-3.38654		48	0.490173	1.28348	0	0.490173	1.28348
19	2.66751	-4.07935	0	2.66751	-4.07935		49	-0.233765	1.05707	0	-0.233765	1.05707
20	2.62723	-4.14148	0	2.62723	-4.14148		50	1.64746	1.78076	0	1.64746	1.78076
21	2.62302	-4.42053	0	2.62302	-4.42053		51	0.535156	2.09549	0	0.535156	2.09549
22	2.10568	-4.78491	0	2.10568	-4.78491		52	1.07111	2.25049	0	1.07111	2.25049
23	2.57812	-5.30609	0	2.57812	-5.30609		53	0.897278	1.93552	0	0.897278	1.93552
24	3.3233	-5.39929	0	3.3233	-5.39929		54	1.68567	2.37463	0	1.68567	2.37463
25	2.90103	-5.71545	0	2.90103	-5.71545		55	1.75079	2.10953	0	1.75079	2.10953
26	3.3717	-5.49609	0	3.3717	-5.49609		56	1.65759	1.27866	0	1.65759	1.27866
27	3.17435	-5.37201	0	3.17435	-5.37201		57	0.532227	0.371246	0	0.532227	0.371246
28	2.96844	-5.79871	0	2.96844	-5.79871		58	0.658447	0.97348	0	0.658447	0.97348
29	2.84113	-5.98981	0	2.84113	-5.98981		59	2.30994	1.21686	0	2.30994	1.21686
30	2.42062	-6.08954	0	2.42062	-6.08954		60	1.48395	0.986206	0	1.48395	0.986206
31	2.75742	-6.68988	0	2.75742	-6.68988		61	1.78729	1.07092	0	1.78729	1.07092
32	2.13684	-6.33777	0	2.13684	-6.33777		62	1.61188	1.77219	0	1.61188	1.77219
33	2.52328	-6.33984	0	2.52328	-6.33984		63	2.00922	1.06055	0	2.00922	1.06055
34	2.68448	-6.63745	0	2.68448	-6.63745		64	3.40686	1.76367	0	3.40686	1.76367
35	2.79156	-6.96515	0	2.79156	-6.96515		65	2.54791	2.00778	0	2.54791	2.00778
36	3.03586	-6.70575	0	3.03586	-6.70575		66	1.95862	1.30887	0	1.95862	1.30887
37	3.16156	-6.62714	0	3.16156	-6.62714		68	4.5545	1.50208	0	4.5545	1.50208
38	3.13104	-6.84796	0	3.13104	-6.84796		69	4.68396	1.31195	0	4.68396	1.31195
39	2.9444	-7.51471	0	2.9444	-7.51471		70	6.0083	1.04401	0	6.0083	1.04401
40	2.1965	-7.29779	0	2.1965	-7.29779		71	4.53052	0.655365	0	4.53052	0.655365
41	2.37637	-7.46881	0	2.37637	-7.46881		74	6.07819	0.516785	0	6.07819	0.516785
42	2.19232	-7.60931	0	2.19232	-7.60931		79	8.43073	-0.878601	0	8.43073	-0.878601
43	2.21634	-7.78613	0	2.21634	-7.78613		81	7.58362	-1.53061	0	7.58362	-1.53061
44	2.13309	-8.12415	0	2.13309	-8.12415		87	6.64874	0.231537	0	6.64874	0.231537
45	1.5834	-8.51599	0	1.5834	-8.51599		91	7.73767	-0.26712	0	7.73767	-0.26712
46	2.17981	-8.70319	0	2.17981	-8.70319		99	8.63306	-3.23926	0	8.63306	-3.23926
47	2.31955	-8.85358	0	2.31955	-8.85358		101	9.7215	-3.04025	0	9.7215	-3.04025
48	2.0759	-8.78839	0	2.0759	-8.78839		102	11.3342	-3.48959	0	11.3342	-3.48959
49	1.47476	-8.52185	0	1.47476	-8.52185		103	11.6191	-2.72064	0	11.6191	-2.72064
50	1.81689	-8.71899	0	1.81689	-8.71899		104	12.4982	-1.62234	0	12.4982	-1.62234
51	2.07858	-9.10535	0	2.07858	-9.10535		105	12.7539	-1.36652	0	12.7539	-1.36652
52	2.21423	-9.15125	0	2.21423	-9.15125		106	13.8992	-1.5477	0	13.8992	-1.5477
53	2.26727	-8.9776	0	2.26727	-8.9776		107	13.6293	-1.97714	0	13.6293	-1.97714
54	2.21933	-8.99347	0	2.21933	-8.99347		108	15.8313	-1.8927	0	15.8313	-1.8927
55	2.23236	-9.12274	0	2.23236	-9.12274		109	15.3903	-1.58197	0	15.3903	-1.58197
56	1.89355	-9.26288	0	1.89355	-9.26288		110	17.2585	-0.713715	0	17.2585	-0.713715
57	2.19186	-9.26093	0	2.19186	-9.26093		111	17.8848	0.265442	0	17.8848	0.265442
58	2.43933	-9.48407	0	2.43933	-9.48407		112	18.2913	0.0780334	0	18.2913	0.0780334
59	2.13663	-9.17859	0	2.13663	-9.17859		113	19.0774	0.287079	0	19.0774	0.287079
60	2.63614	-10.0137	0	2.63614	-10.0137		114	17.3717	0.0557251	0	17.3717	0.0557251
61	3.22226	-10.4503	0	3.22226	-10.4503		115	18.7102	-0.368866	0	18.7102	-0.368866
62	2.57812	-10.3505	0	2.57812	-10.3505		116	18.1774	-0.856903	0	18.1774	-0.856903
63	2.60922	-10.8401	0	2.60922	-10.8401		124	21.1946	-0.493103	0	21.1946	-0.493103
64	2.82306	-10.8699	0	2.82306	-10.8699		125	23.6171	-1.98767	0	23.6171	-1.98767
65	2.97324	-11.2725	0	2.97324	-11.2725		126	25.8833	-3.36609	0	25.8833	-3.36609
66	3.36047	-11.5593	0	3.36047	-11.5593		127	26.3822	-4.38922	0	26.3822	-4.38922
67	3.29755	-11.9652	0	3.29755	-11.9652		128	25.8472	-4.25302	0	25.8472	-4.25302
68	3.17584	-12.0822	0	3.17584	-12.0822		129	27.478	-5.23154	0	27.478	-5.23154
69	4.10333	-12.2101	0	4.10333	-12.2101		130	26.8491	-6.20578	0	26.8491	-6.20578
70	3.76562	-12.6334	0	3.76562	-12.6334		131	26.986	-7.50317	0	26.986	-7.50317
71	4.43744	-13.201	0	4.43744	-13.201		132	26.9434	-7.72256	0	26.9434	-7.72256
72	4.82318	-13.7344	0	4.82318	-13.7344		133	26.5259	-7.4259	0	26.5259	-7.4259
73	4.70239	-13.4157	0	4.70239	-13.4157		135	26.0807	-8.27911	0	26.0807	-8.27911
74	4.67081	-14.8327	0	4.67081	-14.8327		136	26.1339	-8.34177	0	26.1339	-8.34177
75	5.26764	-14.4922	0	5.26764	-14.4922		1	0	0	0	0	0
76	5.78436	-16.2567	0	5.78436	-16.2567		3	0.261841	-0.24176	0	0.261841	-0.24176
77	6.2341	-16.0253	0	6.2341	-16.0253		4	0.0274963	-0.119507	0	0.0274963	-0.119507
78	6.83746	-16.8443	0	6.83746	-16.8443		5	-0.0932312	0.124329	0	-0.0932312	0.124329
79	7.11743	-16.0062	0	7.11743	-16.0062		6	-0.0483398	0.402527	0	-0.0483398	0.402527
80	6.98724	-16.3738	0	6.98724	-16.3738		7	-0.186432	0.326111	0	-0.186432	0.326111
81	7.37323	-11.8535	0	7.37323	-11.8535		8	-0.324554	0.343323	0	-0.324554	0.343323
82	7.42184	-12.0479	0	7.42184	-12.0479		9	-0.333252	0.219543	0	-0.333252	0.219543
83	8.63058	-15.7823	0	8.63058	-15.7823		10	-0.7453	0.353638	0	-0.7453	0.353638
84	8.54245	-15.8427	0	8.54245	-15.8427		11	-1.79388	0.628357	0	-1.79388	0.628357
85	9.45126	-15.8161	0	9.45126	-15.8161		12	-2.37775	0.345276	0	-2.37775	0.345276
86	9.26721	-15.3272	0	9.26721	-15.3272		13	-1.7778	0.137512	0	-1.7778	0.137512
87	9.36246	-15.4327	0	9.36246	-15.4327		14	-1.58478	0.421631	0	-1.58478	0.421631
88	8.63492	-15.2269	0	8.63492	-15.2269		15	-0.963287	0.971741	0	-0.963287	0.971741
89	9.28601	-15.1126	0	9.28601	-15.1126		16	-1.08252	0.0935059	0	-1.08252	0.0935059
90	8.93674	-15.0482	0	8.93674	-15.0482		17	-0.574249	0.548584	0	-0.574249	0.548584
91	9.03293	-14.975	0	9.03293	-14.975		18	-0.590668	0.251648	0	-0.590668	0.251648
92	9.11383	-15.0584	0	9.11383	-15.0584		19	-0.999146	0.0223389	0	-0.999146	0.0223389
93	8.45526	-15.1198	0	8.45526	-15.1198		20	-2.04175	0.357666	0	-2.04175	0.357666
94	8.60107	-15.861	0	8.60107	-15.861		22	-1.72534	-0.218994	0	-1.72534	-0.218994
95	8.59286	-15.6584	0	8.59286	-15.6584		23	-2.19351	0.0842285	0	-2.19351	0.0842285
96	8.99576	-15.6175	0	8.99576	-15.6175		24	-2.36163	0.00537109	0	-2.36163	0.00537109
97	9.05212	-14.7516	0	9.05212	-14.7516		25	-2.80267	-0.215149	0	-2.80267	-0.215149
98	8.95697	-14.8468	0	8.95697	-14.8468		26	-2.55304	-0.495483	0	-2.55304	-0.495483
99	9.3768	-15.6008	0	9.3768	-15.6008		27	-2.65247	0.170715	0	-2.65247	0.170715
100	9.36649	-16.2484	0	9.36649	-16.2484		28	-2.31723	0.155884	0	-2.31723	0.155884
101	9.6619	-17.3551	0	9.6619	-17.3551		29	-2.94217	0.151306	0	-2.94217	0.151306
102	10.1004	-17.7055	0	10.1004	-17.7055		30	-3.15628	-0.522156	0	-3.15628	-0.522156
103	10.2658	-17.6057	0	10.2658	-17.6057		31	-3.98175	-0.484192	0	-3.98175	-0.484192
104	9.71494	-17.8961	0	9.71494	-17.8961		32	-4.79684	-0.764282	0	-4.79684	-0.764282
105	10.1521	-17.5725	0	10.1521	-17.5725		33	-4.87704	-0.773254	0	-4.87704	-0.773254
106	10.7901	-19.8063	0	10.7901	-19.8063		34	-5.27127	-1.67261	0	-5.27127	-1.67261
107	8.96951	-16.0822	0	8.96951	-16.0822		35	-5.22641	-2.20947	0	-5.22641	-2.20947
108	9.96246	-17.655	0	9.96246	-17.655		36	-5.11325	-2.4823	0	-5.11325	-2.4823
109	10.385	-18.6179	0	10.385	-18.6179		37	-5.88181	-2.43146	0	-5.88181	-2.43146
110	11.1903	-15.0806	0	11.1903	-15.0806		38	-6.384	-1.57788	0	-6.384	-1.57788
111	10.7396	-14.895	0	10.7396	-14.895		39	-6.57883	-1.33472	0	-6.57883	-1.33472
112	10.2208	-14.7997	0	10.2208	-14.7997		40	-6.89465	-1.61328	0	-6.89465	-1.61328
113	10.3929	-15.2587	0	10.3929	-15.2587		41	-6.91144	-1.1236	0	-6.91144	-1.1236
114	10.7054	-14.647	0	10.7054	-14.647		42	-6.77054	-0.951111	0	-6.77054	-0.951111
115	10.0867	-14.4916	0	10.0867	-14.4916		43	-6.97342	-1.17584	0	-6.97342	-1.17584
116	10.1646	-13.027	0	10.1646	-13.027		44	-7.08536	-0.744751	0	-7.08536	-0.744751
117	10.8397	-13.4479	0	10.8397	-13.4479		46	-6.99167	-1.18079	0	-6.99167	-1.18079
118	10.7697	-20.3053	0	10.7697	-20.3053		47	-7.01776	-1.35065	0	-7.01776	-1.35065
119	11.0959	-21.5106	0	11.0959	-21.5106		48	-6.93253	-1.40802	0	-6.93253	-1.40802
120	10.9921	-21.1584	0	10.9921	-21.1584		49	-6.35153	-2.12628	0	-6.35153	-2.12628
121	10.8501	-22.8198	0	10.8501	-22.8198		50	-6.92712	-1.80389	0	-6.92712	-1.80389
122	10.7496	-23.2367	0	10.7496	-23.2367		51	-7.23306	-1.58398	0	-7.23306	-1.58398
123	11.2549	-15.3604	0	11.2549	-15.3604		52	-6.95477	-1.24231	0	-6.95477	-1.24231
124	12.0219	-24.0948	0	12.0219	-24.0948		53	-7.28638	-1.30322	0	-7.28638	-1.30322
125	12.5173	-25.0591	0	12.5173	-25.0591		54	-8.03622	-1.06763	0	-8.03622	-1.06763
126	12.2249	-25.3864	0	12.2249	-25.3864		55	-8.53204	-0.802002	0	-8.53204	-0.802002
127	11.91	-24.3898	0	11.91	-24.3898		56	-8.86789	-0.792969	0	-8.86789	-0.792969
128	12.0894	-24.7277	0	12.0894	-24.7277		57	-9.14496	-0.685913	0	-9.14496	-0.685913
129	12.3859	-24.8304	0	12.3859	-24.8304		58	-8.78436	-0.708069	0	-8.78436	-0.708069
130	16.2508	-24.2928	0	16.2508	-24.2928		59	-9.75723	-0.761719	0	-9.75723	-0.761719
131	15.4401	-23.5673	0	15.4401	-23.5673		60	-9.6951	-1.12897	0	-9.6951	-1.12897
132	16.5017	-25.3408	0	16.5017	-25.3408		61	-9.39185	-0.913635	0	-9.39185	-0.913635
133	12.3627	-17.3731	0	12.3627	-17.3731		62	-9.99094	-0.823669	0	-9.99094	-0.823669
1	0	0	0	0	0		63	-10.4709	-0.746399	0	-10.4709	-0.746399
2	-0.453339	-0.301331	0	-0.453339	-0.301331		64	-11.0878	-0.252014	0	-11.0878	-0.252014
3	-1.5929	-0.791443	0	-1.5929	-0.791443		66	-11.8442	-0.165039	0	-11.8442	-0.165039
4	-1.47046	-1.01794	0	-1.47046	-1.01794		68	-12.4734	-0.31311	0	-12.4734	-0.31311
5	-1.85538	-1.00653	0	-1.85538	-1.00653		69	-13.0338	-0.31311	0	-13.0338	-0.31311
6	-2.58795	-1.13428	0	-2.58795	-1.13428		70	-13.4687	-0.681702	0	-13.4687	-0.681702
7	-2.1734	-1.00433	0	-2.1734	-1.00433		72	-13.1443	-0.745728	0	-13.1443	-0.745728
8	-2.38968	-0.638184	0	-2.38968	-0.638184		74	-14.1387	-0.372864	0	-14.1387	-0.372864
9	-1.93155	-0.236877	0	-1.93155	-0.236877		77	-14.0366	-1.25476	0	-14.0366	-1.25476
10	-2.52954	-1.24976	0	-2.52954	-1.24976		78	-13.9756	-1.91229	0	-13.9756	-1.91229
11	-3.45807	-1.10254	0	-3.45807	-1.10254		79	-13.4353	-2.21655	0	-13.4353	-2.21655
12	-3.19943	-0.95752	0	-3.19943	-0.95752		80	-14.5379	-2.56873	0	-14.5379	-2.56873
13	-2.73837	-0.608826	0	-2.73837	-0.608826		81	-14.564	-1.78217	0	-14.564	-1.78217
14	-3.97525	-0.905579	0	-3.97525	-0.905579		82	-14.9962	-1.73395	0	-14.9962	-1.73395
15	-4.91779	-1.29034	0	-4.91779	-1.29034		83	-14.5208	-1.77136	0	-14.5208	-1.77136
16	-5.54071	-1.20392	0	-5.54071	-1.20392		84	-14.6935	-1.38574	0	-14.6935	-1.38574
17	-6.46747	-1.36328	0	-6.46747	-1.36328		85	-14.3598	-1.18005	0	-14.3598	-1.18005
18	-6.96124	-1.87781	0	-6.96124	-1.87781		86	-14.8588	-0.509766	0	-14.8588	-0.509766
19	-7.42734	-1.7724	0	-7.42734	-1.7724		87	-14.1381	-0.227417	0	-14.1381	-0.227417
20	-7.88159	-2.10657	0	-7.88159	-2.10657		88	-14.7456	-0.525269	0	-14.7456	-0.525269
21	-7.71021	-2.02533	0	-7.71021	-2.02533		89	-14.5459	-0.553833	0	-14.5459	-0.553833
22	-7.97012	-2.0213	0	-7.97012	-2.0213		90	-14.0987	-0.287048	0	-14.0987	-0.287048
23	-8.00629	-2.27271	0	-8.00629	-2.27271		91	-13.567	-0.113708	0	-13.567	-0.113708
24	-8.13022	-2.57257	0	-8.13022	-2.57257		92	-12.3343	0.397766	0	-12.3343	0.397766
25	-8.19165	-2.86493	0	-8.19165	-2.86493		93	-11.5924	0.962708	0	-11.5924	0.962708
26	-8.39951	-2.43939	0	-8.39951	-2.43939		94	-9.04599	2.64478	0	-9.04599	2.64478
27	-8.90118	-3.03717	0	-8.90118	-3.03717		95	-8.05139	2.75171	0	-8.05139	2.75171
28	-9.64462	-3.14874	0	-9.64462	-3.14874		96	-7.11151	2.96405	0	-7.11151	2.96405
29	-9.52383	-3.03735	0	-9.52383	-3.03735		97	-6.68146	2.87079	0	-6.68146	2.87079
30	-10.0722	-2.54218	0	-10.0722	-2.54218		98	-5.62177	2.71136	0	-5.62177	2.71136
31	-9.96954	-2.47766	0	-9.96954	-2.47766		99	-4.64209	2.88605	0	-4.64209	2.88605
32	-9.9368	-2.15643	0	-9.9368	-2.15643		100	-4.41699	4.05939	0	-4.41699	4.05939
33	-9.49585	-1.99109	0	-9.49585	-1.99109		101	-1.93689	4.65588	0	-1.93689	4.65588
34	-9.2771	-2.28119	0	-9.2771	-2.28119		102	-1.31445	5.50757	0	-1.31445	5.50757
35	-9.36099	-1.88373	0	-9.36099	-1.88373		104	-0.120636	6.88507	0	-0.120636	6.88507
36	-9.97473	-2.20996	0	-9.97473	-2.20996		105	1.35785	7.59717	0	1.35785	7.59717
37	-9.74814	-2.05408	0	-9.74814	-2.05408		106	1.74625	8.08691	0	1.74625	8.08691
38	-9.41779	-2.65131	0	-9.41779	-2.65131		107	3.00333	8.75415	0	3.00333	8.75415
39	-9.59241	-2.1781	0	-9.59241	-2.1781		108	2.51974	9.07098	0	2.51974	9.07098
40	-10.7106	-1.82336	0	-10.7106	-1.82336		109	3.12015	9.65527	0	3.12015	9.65527
41	-11.5963	-1.86792	0	-11.5963	-1.86792		110	3.78766	10.5956	0	3.78766	10.5956
42	-11.3709	-1.73114	0	-11.3709	-1.73114		111	3.07013	10.6149	0	3.07013	10.6149
43	-11.487	-2.34106	0	-11.487	-2.34106		112	3.44864	11.0749	0	3.44864	11.0749
44	-11.0594	-2.33997	0	-11.0594	-2.33997		113	3.56781	11.8047	0	3.56781	11.8047
45	-10.7685	-2.24933	0	-10.7685	-2.24933		114	3.85742	11.114	0	3.85742	11.114
46	-11.2086	-2.37103	0	-11.2086	-2.37103		115	4.14279	11.9993	0	4.14279	11.9993
47	-10.7097	-2.61627	0	-10.7097	-2.61627		116	5.41974	12.6425	0	5.41974	12.6425
48	-10.7064	-2.80798	0	-10.7064	-2.80798		117	4.86646	12.7125	0	4.86646	12.7125
49	-10.714	-3.133	0	-10.714	-3.133		118	4.86765	12.6959	0	4.86765	12.6959
50	-10.7411	-3.03491	0	-10.7411	-3.03491		119	4.38049	11.5502	0	4.38049	11.5502
51	-10.1194	-3.56317	0	-10.1194	-3.56317		120	4.10263	10.4508	0	4.10263	10.4508
52	-9.99774	-3.61401	0	-9.99774	-3.61401		121	5.108	11.6513	0	5.108	11.6513
53	-10.9355	-3.80817	0	-10.9355	-3.80817		122	4.4957	10.8804	0	4.4957	10.8804
54	-11.096	-3.75336	0	-11.096	-3.75336		123	6.09891	11.3303	0	6.09891	11.3303
55	-10.9233	-3.65662	0	-10.9233	-3.65662		124	5.70554	11.078	0	5.70554	11.078
56	-11.4448	-4.3349	0	-11.4448	-4.3349		125	6.53873	10.8215	0	6.53873	10.8215
57	-11.5123	-4.63348	0	-11.5123	-4.63348		126	7.5502	9.98199	0	7.5502	9.98199
58	-10.22	-5.10571	0	-10.22	-5.10571		127	6.85443	8.55383	0	6.85443	8.55383
59	-10.8458	-5.35907	0	-10.8458	-5.35907		128	7.53546	7.7323	0	7.53546	7.7323
60	-10.814	-5.40118	0	-10.814	-5.40118		129	6.70865	7.23718	0	6.70865	7.23718
61	-11.1807	-5.58447	0	-11.1807	-5.58447		130	7.27133	6.73572	0	7.27133	6.73572
62	-11.3702	-5.69598	0	-11.3702	-5.69598		131	7.01782	6.82214	0	7.01782	6.82214
63	-11.3136	-6.13739	0	-11.3136	-6.13739		132	7.64084	6.40576	0	7.64084	6.40576
64	-11.4752	-6.61798	0	-11.4752	-6.61798		133	7.85422	6.79626	0	7.85422	6.79626
65	-10.9677	-6.06848	0	-10.9677	-6.06848		134	7.12567	6.72046	0	7.12567	6.72046
66	-10.8895	-5.93579	0	-10.8895	-5.93579		136	9.69183	6.04529	0	9.69183	6.04529
67	-10.9279	-6.05695	0	-10.9279	-6.05695		137	10.3194	5.45825	0	10.3194	5.45825
68	-11.0822	-6.58374	0	-11.0822	-6.58374		138	12.0387	4.91681	0	12.0387	4.91681
69	-11.3905	-6.67328	0	-11.3905	-6.67328		1	0	0	0	0	0
70	-11.0035	-6.46039	0	-11.0035	-6.46039		2	2.76379	0.484924	0	2.76379	0.484924
71	-11.0499	-6.9024	0	-11.0499	-6.9024		3	2.44971	0.268158	0	2.44971	0.268158
72	-10.6725	-6.85431	0	-10.6725	-6.85431		4	1.78229	-0.358978	0	1.78229	-0.358978
73	-10.933	-6.9104	0	-10.933	-6.9104		5	-3.83667	-0.765869	0	-3.83667	-0.765869
74	-10.7438	-7.09576	0	-10.7438	-7.09576		6	-3.63257	-0.695953	0	-3.63257	-0.695953
75	-10.7668	-7.06958	0	-10.7668	-7.06958		7	-2.45099	-0.531647	0	-2.45099	-0.531647
76	-10.9634	-6.89209	0	-10.9634	-6.89209		8	-3.36493	-0.96463	0	-3.36493	-0.96463
77	-10.5771	-6.5553	0	-10.5771	-6.5553		9	-2.5545	-0.995728	0	-2.5545	-0.995728
78	-11.1264	-7.35516	0	-11.1264	-7.35516		10	-2.09576	-1.58298	0	-2.09576	-1.58298
79	-10.8515	-7.56378	0	-10.8515	-7.56378		11	-2.11902	-1.36133	0	-2.11902	-1.36133
80	-10.7311	-7.85461	0	-10.7311	-7.85461		12	-1.06079	-1.6774	0	-1.06079	-1.6774
81	-10.6384	-7.94934	0	-10.6384	-7.94934		13	-2.55573	-2.47403	0	-2.55573	-2.47403
82	-9.76077	-8.49469	0	-9.76077	-8.49469		14	-2.10895	-3.34406	0	-2.10895	-3.34406
83	-10.5703	-8.28601	0	-10.5703	-8.28601		15	-1.23145	-3.10028	0	-1.23145	-3.10028
84	-10.5937	-8.78186	0	-10.5937	-8.78186		16	1.53217	-2.39444	0	1.53217	-2.39444
85	-10.7745	-9.64008	0	-10.7745	-9.64008		17	1.47266	-2.22421	0	1.47266	-2.22421
86	-10.3873	-9.06201	0	-10.3873	-9.06201		18	1.3288	-2.34512	0	1.3288	-2.34512
87	-10.5569	-8.96497	0	-10.5569	-8.96497		19	1.89569	-2.03207	0	1.89569	-2.03207
88	-10.8551	-8.85797	0	-10.8551	-8.85797		20	1.84064	-1.53699	0	1.84064	-1.53699
89	-10.2397	-8.06836	0	-10.2397	-8.06836		21	1.5152	-1.6741	0	1.5152	-1.6741
90	-9.70847	-7.90009	0	-9.70847	-7.90009		22	1.90558	-1.96997	0	1.90558	-1.96997
91	-9.24222	-8.36664	0	-9.24222	-8.36664		23	2.38422	-1.9079	0	2.38422	-1.9079
92	-8.39749	-8.20447	0	-8.39749	-8.20447		24	2.53564	-1.63147	0	2.53564	-1.63147
93	-9.15057	-8.28131	0	-9.15057	-8.28131		25	-0.693665	-3.95441	0	-0.693665	-3.95441
94	-9.21555	-8.4975	0	-9.21555	-8.4975		26	-0.722107	-7.05591	0	-0.722107	-7.05591
95	-9.10587	-8.86603	0	-9.10587	-8.86603		28	2.92542	-2.73468	0	2.92542	-2.73468
96	-9.49619	-9.18762	0	-9.49619	-9.18762		29	2.84918	-2.48907	0	2.84918	-2.48907
97	-10.2149	-8.9715	0	-10.2149	-8.9715		30	-2.41803	-8.02417	0	-2.41803	-8.02417
98	-10.7172	-9.77441	0	-10.7172	-9.77441		31	-1.39935	-7.55371	0	-1.39935	-7.55371
99	-10.9817	-10.2554	0	-10.9817	-10.2554		32	2.72491	-3.26859	0	2.72491	-3.26859
100	-11.777	-10.9795	0	-11.777	-10.9795		33	5.58734	0.883881	0	5.58734	0.883881
101	-11.1842	-10.5406	0	-11.1842	-10.5406		34	3.81116	0.0999146	0	3.81116	0.0999146
102	-10.9499	-9.83502	0	-10.9499	-9.83502		35	3.672	0.0045166	0	3.672	0.0045166
103	-10.4305	-10.0109	0	-10.4305	-10.0109		36	2.86499	0.45929	0	2.86499	0.45929
104	-10.3803	-9.61829	0	-10.3803	-9.61829		37	3.85132	0.826019	0	3.85132	0.826019
105	-11.5033	-10.7005	0	-11.5033	-10.7005		38	3.57953	0.122345	0	3.57953	0.122345
106	-10.2018	-9.88361	0	-10.2018	-9.88361		39	2.32196	-3.45529	0	2.32196	-3.45529
107	-10.2896	-9.09869	0	-10.2896	-9.09869		40	5.46643	1.39551	0	5.46643	1.39551
108	-12.1177	-10.0204	0	-12.1177	-10.0204		41	4.76648	1.30887	0	4.76648	1.30887
109	-12.8292	-10.676	0	-12.8292	-10.676		42	4.83765	1.14062	0	4.83765	1.14062
110	-11.936	-10.2592	0	-11.936	-10.2592		43	5.62115	0.894653	0	5.62115	0.894653
111	-12.5102	-10.4681	0	-12.5102	-10.4681		44	5.23743	1.13901	0	5.23743	1.13901
112	-12.294	-10.7228	0	-12.294	-10.7228		45	4.86017	0.82782	0	4.86017	0.82782
113	-12.2599	-10.2466	0	-12.2599	-10.2466		46	4.84521	1.01328	0	4.84521	1.01328
114	-12.695	-9.98761	0	-12.695	-9.98761		47	3.90131	0.67099	0	3.90131	0.67099
115	-11.683	-9.40332	0	-11.683	-9.40332		48	3.72491	0.385284	0	3.72491	0.385284
116	-12.0091	-9.84265	0	-12.0091	-9.84265		49	3.74396	1.38937	0	3.74396	1.38937
117	-11.1024	-9.50006	0	-11.1024	-9.50006		50	4.63739	0.919403	0	4.63739	0.919403
118	-11.1453	-9.4007	0	-11.1453	-9.4007		51	4.99432	0.902924	0	4.99432	0.902924
119	-10.215	-7.51434	0	-10.215	-7.51434		52	4.461	1.24063	0	4.461	1.24063
120	-9.75296	-7.42505	0	-9.75296	-7.42505		53	5.10443	0.98938	0	5.10443	0.98938
121	-9.46005	-7.25555	0	-9.46005	-7.25555		54	4.02527	0.452698	0	4.02527	0.452698
122	-8.82428	-6.45215	0	-8.82428	-6.45215		55	3.75269	0.438232	0	3.75269	0.438232
123	-9.20279	-4.99677	0	-9.20279	-4.99677		56	3.84174	0.677429	0	3.84174	0.677429
124	-9.20862	-4.54199	0	-9.20862	-4.54199		57	4.08313	1.51752	0	4.08313	1.51752
125	-9.76459	-5.07556	0	-9.76459	-5.07556		58	3.79633	0.832794	0	3.79633	0.832794
126	-10.1367	-4.41412	0	-10.1367	-4.41412		59	3.18689	0.248749	0	3.18689	0.248749
127	-10.2833	-4.45563	0	-10.2833	-4.45563		60	3.68652	-0.262573	0	3.68652	-0.262573
128	-10.3754	-4.62708	0	-10.3754	-4.62708		61	3.66876	0.173431	0	3.66876	0.173431
129	-10.7963	-5.01855	0	-10.7963	-5.01855		62	3.99048	0.771423	0	3.99048	0.771423
130	-11.0137	-4.84161	0	-11.0137	-4.84161		63	1.41022	-4.69772	0	1.41022	-4.69772
131	-10.8372	-5.22626	0	-10.8372	-5.22626		64	0.384705	-4.8147	0	0.384705	-4.8147
132	-11.0938	-5.7113	0	-11.0938	-5.7113		65	3.69849	1.30948	0	3.69849	1.30948
133	-11.1399	-6.41882	0	-11.1399	-6.41882		66	2.78656	1.89633	0	2.78656	1.89633
134	-10.5064	-6.11432	0	-10.5064	-6.11432		67	2.58234	1.90479	0	2.58234	1.90479
135	-10.9427	-6.04846	0	-10.9427	-6.04846		68	2.44391	2.11179	0	2.44391	2.11179
136	-10.9776	-6.20624	0	-10.9776	-6.20624		69	3.63367	1.6358	0	3.63367	1.6358
1	0	0	0	0	0		70	2.95203	2.80713	0	2.95203	2.80713
2	-0.342651	-1.27515	0	-0.342651	-1.27515		71	4.05695	2.46255	0	4.05695	2.46255
3	-0.49884	-2.83606	0	-0.49884	-2.83606		72	4.35223	2.37411	0	4.35223	2.37411
4	0.0161133	-0.529236	0	0.0161133	-0.529236		73	3.38196	-3.90585	0	3.38196	-3.90585
5	0.00396729	0.260803	0	0.00396729	0.260803		74	0.903503	-0.893585	0	0.903503	-0.893585
6	-0.277222	-2.28235	0	-0.277222	-2.28235		75	0.737061	-0.28479	0	0.737061	-0.28479
7	-0.117371	-0.913025	0	-0.117371	-0.913025		76	1.01764	0.138184	0	1.01764	0.138184
8	0.131653	-0.0488892	0	0.131653	-0.0488892		77	0.852234	0.00375366	0	0.852234	0.00375366
9	0.257141	0.242371	0	0.257141	0.242371		78	2.1286	-0.372559	0	2.1286	-0.372559
10	0.332581	0.729553	0	0.332581	0.729553		79	1.69489	-0.305511	0	1.69489	-0.305511
11	-0.322876	0.367981	0	-0.322876	0.367981		80	1.65106	0.0158691	0	1.65106	0.0158691
12	-0.596375	-0.344604	0	-0.596375	-0.344604		81	1.70312	-0.0720215	0	1.70312	-0.0720215
13	-0.355652	-0.437866	0	-0.355652	-0.437866		82	-0.39209	-0.706146	0	-0.39209	-0.706146
14	-0.205566	0.259399	0	-0.205566	0.259399		83	-1.29883	-0.431458	0	-1.29883	-0.431458
15	0.00585938	-0.316528	0	0.00585938	-0.316528		84	1.10168	-0.40274	0	1.10168	-0.40274
16	-0.356995	-0.0925293	0	-0.356995	-0.0925293		85	1.10248	0.432037	0	1.10248	0.432037
17	-0.299011	0.230957	0	-0.299011	0.230957		86	-1.45471	-1.93903	0	-1.45471	-1.93903
18	-0.345398	0.313965	0	-0.345398	0.313965		87	0.208618	-0.660797	0	0.208618	-0.660797
19	-0.394348	0.140564	0	-0.394348	0.140564		88	0.492188	-0.305542	0	0.492188	-0.305542
20	-0.372498	-0.11322	0	-0.372498	-0.11322		89	0.428955	1.18521	0	0.428955	1.18521
21	-0.337769	0.281982	0	-0.337769	0.281982		90	-0.700195	-1.95767	0	-0.700195	-1.95767
22	-0.334961	0.38269	0	-0.334961	0.38269		91	-0.873291	-2.21268	0	-0.873291	-2.21268
23	-0.152344	-0.287354	0	-0.152344	-0.287354		92	-0.770203	-1.95636	0	-0.770203	-1.95636
24	-0.135376	0.164917	0	-0.135376	0.164917		93	-1.15094	-2.27237	0	-1.15094	-2.27237
25	-0.154785	0.357727	0	-0.154785	0.357727		94	1.23865	0.876404	0	1.23865	0.876404
26	-0.235413	0.509399	0	-0.235413	0.509399		95	-0.215942	-2.9158	0	-0.215942	-2.9158
27	-0.36554	0.438721	0	-0.36554	0.438721		96	-1.52301	-3.69855	0	-1.52301	-3.69855
28	-0.471252	0.176453	0	-0.471252	0.176453		97	-2.36493	-4.39212	0	-2.36493	-4.39212
29	-0.718506	0.055603	0	-0.718506	0.055603		98	-3.00769	-4.16168	0	-3.00769	-4.16168
30	-0.587769	0.552307	0	-0.587769	0.552307		99	-3.2204	-4.61057	0	-3.2204	-4.61057
31	-0.905579	0.742493	0	-0.905579	0.742493		100	-2.4588	-1.35074	0	-2.4588	-1.35074
32	-0.857117	0.662048	0	-0.857117	0.662048		101	-3.16943	-4.79883	0	-3.16943	-4.79883
33	-0.746033	0.898193	0	-0.746033	0.898193		102	-3.00269	-5.73584	0	-3.00269	-5.73584
34	-0.494873	1.09119	0	-0.494873	1.09119		103	-4.60248	-5.82449	0	-4.60248	-5.82449
35	-0.467224	1.21332	0	-0.467224	1.21332		104	-3.13342	-2.88766	0	-3.13342	-2.88766
36	-0.556702	1.68427	0	-0.556702	1.68427		105	-2.04877	-3.03076	0	-2.04877	-3.03076
37	-0.716248	1.03571	0	-0.716248	1.03571		106	-4.87329	-6.80637	0	-4.87329	-6.80637
38	-0.742493	0.886047	0	-0.742493	0.886047		107	-4.39264	-7.9563	0	-4.39264	-7.9563
39	-0.262756	1.0636	0	-0.262756	1.0636		108	-2.70477	-4.92685	0	-2.70477	-4.92685
40	-1.07587	1.15277	0	-1.07587	1.15277		109	-3.58661	-4.63214	0	-3.58661	-4.63214
41	-1.39661	0.862732	0	-1.39661	0.862732		110	-4.70068	-4.51779	0	-4.70068	-4.51779
42	-0.991211	2.1673	0	-0.991211	2.1673		111	-4.2038	-4.44247	0	-4.2038	-4.44247
43	-1.23315	1.06311	0	-1.23315	1.06311		112	-6.07977	-9.35648	0	-6.07977	-9.35648
44	-1.61823	1.01843	0	-1.61823	1.01843		113	-5.12018	-5.43262	0	-5.12018	-5.43262
45	-1.62494	1.3479	0	-1.62494	1.3479		114	-6.56024	-10.8673	0	-6.56024	-10.8673
46	-1.46698	1.62708	0	-1.46698	1.62708		115	-6.7121	-10.3174	0	-6.7121	-10.3174
47	-1.73206	1.81061	0	-1.73206	1.81061		116	-6.44141	-5.72742	0	-6.44141	-5.72742
48	-1.38727	1.9314	0	-1.38727	1.9314		117	-6.42462	-6.23248	0	-6.42462	-6.23248
49	-1.68652	2.26135	0	-1.68652	2.26135		118	-7.01239	-6.31686	0	-7.01239	-6.31686
50	-1.44592	2.17261	0	-1.44592	2.17261		119	-6.41058	-7.07623	0	-6.41058	-7.07623
51	-1.62537	1.91235	0	-1.62537	1.91235		120	-4.92468	-7.35147	0	-4.92468	-7.35147
52	-1.4447	2.73108	0	-1.4447	2.73108		121	-4.18689	-7.35147	0	-4.18689	-7.35147
53	-1.59216	2.88153	0	-1.59216	2.88153		122	-5.69153	-7.7934	0	-5.69153	-7.7934
54	-1.39917	2.64923	0	-1.39917	2.64923		123	-5.59418	-8.58749	0	-5.59418	-8.58749
55	-2.02557	2.4057	0	-2.02557	2.4057		124	-5.58661	-8.23645	0	-5.58661	-8.23645
56	-1.62341	2.11993	0	-1.62341	2.11993		125	-7.04736	-8.41525	0	-7.04736	-8.41525
57	-1.33044	2.70056	0	-1.33044	2.70056		126	-7.33881	-12.2855	0	-7.33881	-12.2855
58	-1.48315	2.33435	0	-1.48315	2.33435		127	-7.67468	-12.0811	0	-7.67468	-12.0811
59	-1.3418	2.42371	0	-1.3418	2.42371		128	-8.31165	-11.7409	0	-8.31165	-11.7409
60	-1.63373	2.26434	0	-1.63373	2.26434		129	-8.54352	-12.0054	0	-8.54352	-12.0054
61	-1.3031	3.27625	0	-1.3031	3.27625		130	-6.41608	-10.0139	0	-6.41608	-10.0139
62	-1.61572	2.44403	0	-1.61572	2.44403		131	-8.57965	-12.7923	0	-8.57965	-12.7923
63	-1.12122	2.70532	0	-1.12122	2.70532		132	-5.04675	-8.66684	0	-5.04675	-8.66684
64	-1.41943	1.84076	0	-1.41943	1.84076		133	-4.83606	-8.61224	0	-4.83606	-8.61224
65	-1.604	2.53632	0	-1.604	2.53632		134	-4.66821	-8.66556	0	-4.66821	-8.66556
66	-1.37677	2.33893	0	-1.37677	2.33893		135	-5.71381	-8.12039	0	-5.71381	-8.12039
67	-1.59546	1.71252	0	-1.59546	1.71252		136	-8.25751	-11.2844	0	-8.25751	-11.2844
68	-1.388	1.68787	0	-1.388	1.68787		137	-7.54639	-11.227	0	-7.54639	-11.227
69	-1.21338	1.61572	0	-1.21338	1.61572		138	-6.73224	-10.8715	0	-6.73224	-10.8715
70	-1.03564	2.28925	0	-1.03564	2.28925		1	0	0	0	0	0
71	-1.14355	2.05713	0	-1.14355	2.05713		2	0.542175	-3.56802	0	0.542175	-3.56802
72	-1.05804	2.3313	0	-1.05804	2.3313		3	0.511902	-3.25894	0	0.511902	-3.25894
73	-0.989746	2.25977	0	-0.989746	2.25977		4	0.548401	-3.42157	0	0.548401	-3.42157
74	-0.985413	2.58746	0	-0.985413	2.58746		5	0.452759	-1.81039	0	0.452759	-1.81039
75	-1.2218	2.58636	0	-1.2218	2.58636		6	0.330566	-2.55798	0	0.330566	-2.55798
76	-1.05786	2.30518	0	-1.05786	2.30518		7	0.330017	-3.34955	0	0.330017	-3.34955
77	-1.01282	2.20593	0	-1.01282	2.20593		8	0.958984	-2.3559	0	0.958984	-2.3559
78	-0.852051	2.67139	0	-0.852051	2.67139		9	0.591797	-3.85709	0	0.591797	-3.85709
79	-0.864441	2.78607	0	-0.864441	2.78607		10	0.772827	-2.70633	0	0.772827	-2.70633
80	-0.65863	3.20892	0	-0.65863	3.20892		11	0.573608	-4.19858	0	0.573608	-4.19858
81	-0.665222	3.35278	0	-0.665222	3.35278		12	-0.0493164	-5.099	0	-0.0493164	-5.099
82	-0.768066	3.12048	0	-0.768066	3.12048		13	-0.156189	-1.80579	0	-0.156189	-1.80579
83	-0.540588	3.30042	0	-0.540588	3.30042		14	0.362122	-2.92169	0	0.362122	-2.92169
84	-0.951355	2.82117	0	-0.951355	2.82117		15	0.117554	-3.11526	0	0.117554	-3.11526
85	-0.856567	2.74744	0	-0.856567	2.74744		16	0.28418	-6.40952	0	0.28418	-6.40952
86	-0.974731	2.30884	0	-0.974731	2.30884		17	0.367493	-6.98114	0	0.367493	-6.98114
87	-0.438354	3.10773	0	-0.438354	3.10773		18	0.353577	-6.54019	0	0.353577	-6.54019
88	-0.757935	3.11444	0	-0.757935	3.11444		19	0.31189	-6.996	0	0.31189	-6.996
89	-0.961487	3.15216	0	-0.961487	3.15216		20	-0.874817	-8.46964	0	-0.874817	-8.46964
90	-0.923096	2.39722	0	-0.923096	2.39722		21	-0.879578	-8.17682	0	-0.879578	-8.17682
91	-0.796387	2.51208	0	-0.796387	2.51208		22	-0.489136	-8.67218	0	-0.489136	-8.67218
92	-0.822815	2.87988	0	-0.822815	2.87988		23	-0.223755	-9.32397	0	-0.223755	-9.32397
93	-1.44263	2.77081	0	-1.44263	2.77081		24	-0.436462	-9.32693	0	-0.436462	-9.32693
94	-1.04541	3.23077	0	-1.04541	3.23077		25	-0.299683	-10.7356	0	-0.299683	-10.7356
95	-1.68677	2.88538	0	-1.68677	2.88538		26	-0.911499	-10.9026	0	-0.911499	-10.9026
96	-1.49677	2.99744	0	-1.49677	2.99744		27	-7.44891	-7.14255	0	-7.44891	-7.14255
97	-1.58258	3.04114	0	-1.58258	3.04114		28	0.0163574	-11.0622	0	0.0163574	-11.0622
98	-1.42084	4.06219	0	-1.42084	4.06219		29	-0.313049	-10.6112	0	-0.313049	-10.6112
99	-1.86823	3.49072	0	-1.86823	3.49072		30	-2.06311	-8.36044	0	-2.06311	-8.36044
100	-1.4494	2.91071	0	-1.4494	2.91071		31	-1.08313	-6.71225	0	-1.08313	-6.71225
101	-1.52136	3.98932	0	-1.52136	3.98932		32	-1.06921	-11.2054	0	-1.06921	-11.2054
102	-1.26007	4.2146	0	-1.26007	4.2146		33	-1.08759	-11.4178	0	-1.08759	-11.4178
103	-1.3587	3.77521	0	-1.3587	3.77521		34	-0.831543	-11.7114	0	-0.831543	-11.7114
104	-1.763	3.99072	0	-1.763	3.99072		35	-1.79675	-11.0424	0	-1.79675	-11.0424
105	-1.38489	3.84259	0	-1.38489	3.84259		36	-2.61536	-9.73853	0	-2.61536	-9.73853
106	-1.13892	4.08667	0	-1.13892	4.08667		37	-2.83337	-10.586	0	-2.83337	-10.586
107	-1.67487	4.05103	0	-1.67487	4.05103		38	-2.28351	-11.4409	0	-2.28351	-11.4409
108	-2.04279	3.53876	0	-2.04279	3.53876		39	-1.9613	-11.4438	0	-1.9613	-11.4438
109	-1.4743	3.00397	0	-1.4743	3.00397		40	-2.13446	-11.7043	0	-2.13446	-11.7043
110	-2.16577	3.18811	0	-2.16577	3.18811		41	-1.62689	-11.1145	0	-1.62689	-11.1145
111	-1.7533	3.75098	0	-1.7533	3.75098		42	-0.942688	-11.1288	0	-0.942688	-11.1288
112	-1.8725	3.94324	0	-1.8725	3.94324		43	-0.848328	-11.2374	0	-0.848328	-11.2374
113	-1.1347	2.8277	0	-1.1347	2.8277		44	-1.72565	-11.0545	0	-1.72565	-11.0545
114	-1.6322	2.65186	0	-1.6322	2.65186		45	-2.17505	-10.947	0	-2.17505	-10.947
115	-1.71625	2.91418	0	-1.71625	2.91418		46	-2.56128	-10.5329	0	-2.56128	-10.5329
116	-1.51947	3.06329	0	-1.51947	3.06329		47	-2.53387	-10.693	0	-2.53387	-10.693
117	-1.83765	2.93896	0	-1.83765	2.93896		48	-1.86053	-11.5149	0	-1.86053	-11.5149
118	-1.6944	2.92883	0	-1.6944	2.92883		49	-1.25006	-11.2013	0	-1.25006	-11.2013
119	-1.93671	2.87665	0	-1.93671	2.87665		50	-0.815613	-10.6952	0	-0.815613	-10.6952
120	-2.44305	2.88007	0	-2.44305	2.88007		51	-1.12445	-11.9236	0	-1.12445	-11.9236
121	-1.61572	3.0528	0	-1.61572	3.0528		52	-0.453186	-11.3385	0	-0.453186	-11.3385
122	-2.01862	3.03107	0	-2.01862	3.03107		53	-1.14191	-11.406	0	-1.14191	-11.406
123	-1.58759	2.82556	0	-1.58759	2.82556		54	-0.866882	-11.5347	0	-0.866882	-11.5347
124	-1.22858	2.51013	0	-1.22858	2.51013		55	-1.17938	-11.7183	0	-1.17938	-11.7183
125	-1.76825	2.67908	0	-1.76825	2.67908		56	-1.33331	-11.748	0	-1.33331	-11.748
126	-1.31738	3.05438	0	-1.31738	3.05438		57	-0.674133	-11.3291	0	-0.674133	-11.3291
127	-1.1618	2.90045	0	-1.1618	2.90045		58	-0.25647	-11.2942	0	-0.25647	-11.2942
128	-1.2627	3.5592	0	-1.2627	3.5592		59	0.494141	-11.7996	0	0.494141	-11.7996
129	-1.46594	2.32153	0	-1.46594	2.32153		60	0.314636	-11.4739	0	0.314636	-11.4739
130	-1.19702	2.26062	0	-1.19702	2.26062		61	0.251709	-11.8517	0	0.251709	-11.8517
131	-0.471985	3.81525	0	-0.471985	3.81525		62	-0.41925	-11.6931	0	-0.41925	-11.6931
132	-0.530029	2.77374	0	-0.530029	2.77374		63	-1.63025	-11.7849	0	-1.63025	-11.7849
133	-0.680847	3.81042	0	-0.680847	3.81042		64	-1.02002	-11.9155	0	-1.02002	-11.9155
134	-0.97467	2.48297	0	-0.97467	2.48297		65	-0.672607	-11.8681	0	-0.672607	-11.8681
135	-1.14398	3.21606	0	-1.14398	3.21606		66	-0.40033	-11.5935	0	-0.40033	-11.5935
136	-0.459595	4.33319	0	-0.459595	4.33319		67	0.332336	-11.9549	0	0.332336	-11.9549
1	0	0	0	0	0		68	-0.271851	-12.1876	0	-0.271851	-12.1876
2	0.836365	-0.122314	0	0.836365	-0.122314		69	-0.905151	-11.7004	0	-0.905151	-11.7004
3	1.0733	-0.182495	0	1.0733	-0.182495		70	-1.15057	-11.9062	0	-1.15057	-11.9062
4	-0.748901	-0.237854	0	-0.748901	-0.237854		71	-1.64734	-11.8087	0	-1.64734	-11.8087
5	0.532104	-0.201111	0	0.532104	-0.201111		72	-1.18896	-11.5242	0	-1.18896	-11.5242
6	0.839844	-0.440552	0	0.839844	-0.440552		73	-1.37891	-12.3282	0	-1.37891	-12.3282
7	0.628479	-0.458923	0	0.628479	-0.458923		74	-1.46667	-11.7002	0	-1.46667	-11.7002
8	1.79456	0.30603	0	1.79456	0.30603		75	-1.80438	-10.9075	0	-1.80438	-10.9075
9	1.61884	-0.375488	0	1.61884	-0.375488		76	-1.3205	-10.7181	0	-1.3205	-10.7181
10	-3.00787	1.12854	0	-3.00787	1.12854		77	-0.864075	-11.1982	0	-0.864075	-11.1982
11	-5.59052	-0.151123	0	-5.59052	-0.151123		78	-0.946228	-11.452	0	-0.946228	-11.452
12	0.03125	-0.493347	0	0.03125	-0.493347		79	-1.56525	-11.2053	0	-1.56525	-11.2053
13	0.692139	-0.185913	0	0.692139	-0.185913		80	-1.37006	-13.3044	0	-1.37006	-13.3044
14	0.856628	-0.577942	0	0.856628	-0.577942		81	-1.3205	-13.0891	0	-1.3205	-13.0891
15	1.21246	-0.197205	0	1.21246	-0.197205		82	-1.03003	-13.2766	0	-1.03003	-13.2766
16	0.709167	-0.00732422	0	0.709167	-0.00732422		83	-1.46674	-12.4093	0	-1.46674	-12.4093
17	1.15149	-0.0393677	0	1.15149	-0.0393677		84	-1.98407	-12.8017	0	-1.98407	-12.8017
18	2.56079	0.728638	0	2.56079	0.728638		85	-2.36774	-12.4386	0	-2.36774	-12.4386
19	0.74408	0.560669	0	0.74408	0.560669		86	-2.09149	-12.1755	0	-2.09149	-12.1755
20	0.658142	0.111328	0	0.658142	0.111328		87	-1.06598	-11.9807	0	-1.06598	-11.9807
21	0.770691	0.356873	0	0.770691	0.356873		88	-1.08807	-11.874	0	-1.08807	-11.874
22	0.184082	0.900574	0	0.184082	0.900574		89	-1.57513	-11.9243	0	-1.57513	-11.9243
23	0.608398	-0.33551	0	0.608398	-0.33551		90	-1.91309	-11.5695	0	-1.91309	-11.5695
24	0.331299	0.634705	0	0.331299	0.634705		91	-1.77563	-12.024	0	-1.77563	-12.024
25	0.941528	0.429932	0	0.941528	0.429932		92	-1.81122	-11.8283	0	-1.81122	-11.8283
26	1.67859	0.439636	0	1.67859	0.439636		93	-1.48816	-12.2669	0	-1.48816	-12.2669
28	0.452332	-0.0935059	0	0.452332	-0.0935059		94	-1.31299	-12.5441	0	-1.31299	-12.5441
29	0.415527	-0.108521	0	0.415527	-0.108521		95	-1.04773	-12.126	0	-1.04773	-12.126
30	-4.86334	2.12982	0	-4.86334	2.12982		96	-1.33356	-12.2355	0	-1.33356	-12.2355
31	-4.69403	1.60846	0	-4.69403	1.60846		97	-1.63336	-11.3575	0	-1.63336	-11.3575
32	-0.184082	0.0847778	0	-0.184082	0.0847778		98	-1.35706	-11.654	0	-1.35706	-11.654
33	-0.145264	-0.03125	0	-0.145264	-0.03125		99	-1.33813	-10.924	0	-1.33813	-10.924
34	-4.32007	1.53564	0	-4.32007	1.53564		100	-1.66846	-10.767	0	-1.66846	-10.767
35	-6.29028	1.64807	0	-6.29028	1.64807		101	-1.52704	-10.6777	0	-1.52704	-10.6777
36	-0.870667	0.319092	0	-0.870667	0.319092		102	-1.19946	-10.7591	0	-1.19946	-10.7591
37	-0.639465	0.405701	0	-0.639465	0.405701		103	-1.23083	-10.9815	0	-1.23083	-10.9815
38	-5.75165	2.42963	0	-5.75165	2.42963		104	-0.857422	-11.0191	0	-0.857422	-11.0191
39	-1.33923	0.465088	0	-1.33923	0.465088		105	-0.773499	-10.6058	0	-0.773499	-10.6058
40	-7.08521	2.05829	0	-7.08521	2.05829		106	-0.525452	-10.7139	0	-0.525452	-10.7139
41	-1.3266	-0.298889	0	-1.3266	-0.298889		107	-0.910156	-10.4277	0	-0.910156	-10.4277
42	-1.32013	-0.472717	0	-1.32013	-0.472717		108	-1.7674	-11.0071	0	-1.7674	-11.0071
43	-1.40106	-0.485596	0	-1.40106	-0.485596		109	-2.06854	-10.9475	0	-2.06854	-10.9475
44	-5.17633	1.52655	0	-5.17633	1.52655		110	-2.0304	-11.4835	0	-2.0304	-11.4835
45	-5.24292	1.66718	0	-5.24292	1.66718		111	-1.74207	-10.4178	0	-1.74207	-10.4178
46	-1.76617	0.0818481	0	-1.76617	0.0818481		112	-2.04675	-10.3169	0	-2.04675	-10.3169
47	-2.43988	0.592834	0	-2.43988	0.592834		113	-1.93097	-10.8318	0	-1.93097	-10.8318
48	-2.50842	0.588806	0	-2.50842	0.588806		114	-1.72241	-10.4998	0	-1.72241	-10.4998
49	-2.00085	0.860229	0	-2.00085	0.860229		115	-1.84747	-11.1733	0	-1.84747	-11.1733
51	-2.87689	0.817749	0	-2.87689	0.817749		116	-1.74799	-10.7774	0	-1.74799	-10.7774
52	-1.95337	1.22693	0	-1.95337	1.22693		117	-2.03894	-10.8873	0	-2.03894	-10.8873
53	-2.43231	1.30908	0	-2.43231	1.30908		118	-1.40485	-11.4836	0	-1.40485	-11.4836
58	-2.48077	0.891479	0	-2.48077	0.891479		119	-0.862976	-10.86	0	-0.862976	-10.86
61	-5.79535	3.13342	0	-5.79535	3.13342		120	-0.937805	-11.2229	0	-0.937805	-11.2229
62	-6.37445	2.72778	0	-6.37445	2.72778		121	-1.62622	-10.9016	0	-1.62622	-10.9016
63	-1.61737	1.28741	0	-1.61737	1.28741		122	-1.59357	-10.7548	0	-1.59357	-10.7548
64	-1.53778	0.562256	0	-1.53778	0.562256		123	-1.38739	-10.3753	0	-1.38739	-10.3753
71	-1.95697	0.533997	0	-1.95697	0.533997		124	-1.75604	-10.2683	0	-1.75604	-10.2683
75	-1.74835	0.934509	0	-1.74835	0.934509		125	-0.859192	-10.8901	0	-0.859192	-10.8901
77	-1.04297	1.15076	0	-1.04297	1.15076		126	-0.647156	-11.4109	0	-0.647156	-11.4109
80	-1.01849	1.02618	0	-1.01849	1.02618		127	-0.81366	-10.9089	0	-0.81366	-10.9089
84	-1.64087	1.7868	0	-1.64087	1.7868		128	-0.731628	-10.9002	0	-0.731628	-10.9002
85	-1.54822	1.94336	0	-1.54822	1.94336		129	-0.351257	-10.478	0	-0.351257	-10.478
89	-0.94397	1.73767	0	-0.94397	1.73767		130	-0.478394	-10.6081	0	-0.478394	-10.6081
90	-1.2157	1.65295	0	-1.2157	1.65295		131	-0.713562	-10.2463	0	-0.713562	-10.2463
91	-1.87958	1.71552	0	-1.87958	1.71552		132	-1.42133	-11.1449	0	-1.42133	-11.1449
92	-1.53925	1.59045	0	-1.53925	1.59045		133	-1.44025	-10.657	0	-1.44025	-10.657
93	-2.86963	1.93445	0	-2.86963	1.93445		134	-2.21747	-10.5503	0	-2.21747	-10.5503
94	-3.06177	2.22351	0	-3.06177	2.22351		135	-2.05365	-11.5228	0	-2.05365	-11.5228
103	-6.1842	3.258	0	-6.1842	3.258		136	-1.82184	-10.9901	0	-1.82184	-10.9901
104	-4.76178	2.42371	0	-4.76178	2.42371		137	-1.67548	-10.8826	0	-1.67548	-10.8826
105	-3.26685	1.93054	0	-3.26685	1.93054		138	-1.45758	-10.5481	0	-1.45758	-10.5481
106	-3.49561	1.90277	0	-3.49561	1.90277		1	0	0	0	0	0
107	-6.00842	2.85785	0	-6.00842	2.85785		2	-0.533813	-0.0286255	0	-0.533813	-0.0286255
108	-5.15558	2.26013	0	-5.15558	2.26013		3	0.0847778	-0.143982	0	0.0847778	-0.143982
109	-5.87396	2.48511	0	-5.87396	2.48511		4	0.290344	-0.173401	0	0.290344	-0.173401
110	-5.03821	1.90863	0	-5.03821	1.90863		5	0.0182495	-0.392456	0	0.0182495	-0.392456
111	-5.06531	1.81958	0	-5.06531	1.81958		6	0.0515137	-0.437927	0	0.0515137	-0.437927
112	-4.75073	1.99524	0	-4.75073	1.99524		7	-0.354004	-0.219604	0	-0.354004	-0.219604
113	-6.10693	2.75665	0	-6.10693	2.75665		8	-0.197388	-0.497009	0	-0.197388	-0.497009
114	-6.48206	3.56989	0	-6.48206	3.56989		9	-0.619324	-0.433472	0	-0.619324	-0.433472
115	-5.77612	3.72144	0	-5.77612	3.72144		10	-1.11951	-0.651794	0	-1.11951	-0.651794
116	-5.18427	4.0686	0	-5.18427	4.0686		11	0.323425	-0.75592	0	0.323425	-0.75592
117	-5.81445	4.28455	0	-5.81445	4.28455		12	0.744019	-1.27985	0	0.744019	-1.27985
118	-4.85602	4.22302	0	-4.85602	4.22302		13	-0.708679	-1.38312	0	-0.708679	-1.38312
119	-4.62982	3.87054	0	-4.62982	3.87054		14	-0.48175	-1.34076	0	-0.48175	-1.34076
120	-4.513	3.39459	0	-4.513	3.39459		15	-0.641846	-1.39105	0	-0.641846	-1.39105
121	-4.87634	3.41791	0	-4.87634	3.41791		16	-0.059021	-1.74585	0	-0.059021	-1.74585
122	-5.07019	3.60748	0	-5.07019	3.60748		17	0.221863	-1.93634	0	0.221863	-1.93634
123	-4.36987	3.56061	0	-4.36987	3.56061		18	0.297913	-2.03497	0	0.297913	-2.03497
1	0	0	0	0	0		19	0.420288	-2.30609	0	0.420288	-2.30609
2	-1.04633	0.492493	0	-1.04633	0.492493		20	0.424561	-2.23199	0	0.424561	-2.23199
3	-1.75232	0.487732	0	-1.75232	0.487732		21	0.713745	-2.49774	0	0.713745	-2.49774
4	-1.80914	1.0509	0	-1.80914	1.0509		22	0.875977	-2.50397	0	0.875977	-2.50397
5	-1.96063	0.947205	0	-1.96063	0.947205		23	1.04944	-2.81586	0	1.04944	-2.81586
6	-2.44208	1.30585	0	-2.44208	1.30585		24	1.74329	-3.37024	0	1.74329	-3.37024
7	-3.09625	1.56586	0	-3.09625	1.56586		25	2.24988	-3.17114	0	2.24988	-3.17114
8	-3.97723	1.20233	0	-3.97723	1.20233		26	1.87616	-2.70215	0	1.87616	-2.70215
9	-4.1499	1.36203	0	-4.1499	1.36203		27	2.04266	-3.00916	0	2.04266	-3.00916
10	-4.81189	1.9621	0	-4.81189	1.9621		28	1.9845	-3.27936	0	1.9845	-3.27936
11	-5.87891	2.09109	0	-5.87891	2.09109		29	2.34418	-3.34119	0	2.34418	-3.34119
12	-5.44952	2.03915	0	-5.44952	2.03915		30	3.66101	-3.38818	0	3.66101	-3.38818
13	-5.75745	2.3154	0	-5.75745	2.3154		31	2.77484	-3.98425	0	2.77484	-3.98425
14	-6.02014	2.98853	0	-6.02014	2.98853		32	2.88287	-4.5246	0	2.88287	-4.5246
15	-7.48706	2.79306	0	-7.48706	2.79306		33	3.37964	-4.4375	0	3.37964	-4.4375
16	-7.55054	3.12036	0	-7.55054	3.12036		34	3.82666	-4.55188	0	3.82666	-4.55188
17	-7.51233	3.81653	0	-7.51233	3.81653		35	3.74695	-5.77692	0	3.74695	-5.77692
18	-8.19717	3.76743	0	-8.19717	3.76743		36	4.4317	-6.16449	0	4.4317	-6.16449
19	-8.44815	3.72888	0	-8.44815	3.72888		37	3.92877	-5.72662	0	3.92877	-5.72662
20	-9.24777	4.05276	0	-9.24777	4.05276		38	3.93781	-6.29987	0	3.93781	-6.29987
21	-9.78116	4.01758	0	-9.78116	4.01758		39	3.92981	-6.79388	0	3.92981	-6.79388
22	-9.76401	3.92712	0	-9.76401	3.92712		40	4.8006	-6.7522	0	4.8006	-6.7522
23	-9.42477	4.35309	0	-9.42477	4.35309		41	4.23315	-6.50537	0	4.23315	-6.50537
24	-10.0134	4.83029	0	-10.0134	4.83029		42	3.99957	-6.64764	0	3.99957	-6.64764
25	-9.8829	5.71524	0	-9.8829	5.71524		43	3.66791	-6.48071	0	3.66791	-6.48071
26	-8.85437	6.28876	0	-8.85437	6.28876		44	4.36938	-6.47595	0	4.36938	-6.47595
27	-8.67645	6.46039	0	-8.67645	6.46039		45	4.03351	-7.10449	0	4.03351	-7.10449
28	-8.73752	6.75797	0	-8.73752	6.75797		46	4.88287	-6.86853	0	4.88287	-6.86853
29	-8.48965	7.24725	0	-8.48965	7.24725		47	3.43127	-6.74481	0	3.43127	-6.74481
30	-7.89709	7.15002	0	-7.89709	7.15002		48	4.18036	-7.95435	0	4.18036	-7.95435
31	-7.95605	7.93283	0	-7.95605	7.93283		49	3.99927	-8.28564	0	3.99927	-8.28564
32	-7.58142	6.90372	0	-7.58142	6.90372		50	4.04822	-9.01837	0	4.04822	-9.01837
33	-7.76636	7.22882	0	-7.76636	7.22882		51	4.26282	-8.72345	0	4.26282	-8.72345
34	-7.7695	7.46548	0	-7.7695	7.46548		52	3.80682	-8.71173	0	3.80682	-8.71173
35	-7.87198	7.78595	0	-7.87198	7.78595		53	4.01562	-9.36603	0	4.01562	-9.36603
36	-8.18613	8.50137	0	-8.18613	8.50137		54	4.07202	-9.15259	0	4.07202	-9.15259
37	-8.13123	8.9527	0	-8.13123	8.9527		55	3.63123	-10.2505	0	3.63123	-10.2505
38	-8.45084	8.83261	0	-8.45084	8.83261		56	3.36267	-10.0738	0	3.36267	-10.0738
39	-8.47485	9.37387	0	-8.47485	9.37387		57	3.56879	-10.2721	0	3.56879	-10.2721
40	-8.86108	9.07556	0	-8.86108	9.07556		58	2.89423	-10.2629	0	2.89423	-10.2629
41	-9.01602	9.60922	0	-9.01602	9.60922		59	3.81439	-10.4922	0	3.81439	-10.4922
42	-8.33722	9.17438	0	-8.33722	9.17438		60	2.88776	-10.2228	0	2.88776	-10.2228
43	-8.67725	9.64026	0	-8.67725	9.64026		61	2.51105	-10.7656	0	2.51105	-10.7656
44	-8.94308	9.58276	0	-8.94308	9.58276		62	3.2605	-11.1699	0	3.2605	-11.1699
45	-8.79175	9.35822	0	-8.79175	9.35822		63	2.97308	-11.0978	0	2.97308	-11.0978
46	-8.69559	9.30927	0	-8.69559	9.30927		64	3.24805	-11.0998	0	3.24805	-11.0998
47	-9.71524	8.91797	0	-9.71524	8.91797		65	2.60541	-11.5151	0	2.60541	-11.5151
48	-10.1817	8.91736	0	-10.1817	8.91736		66	2.25787	-12.1812	0	2.25787	-12.1812
49	-10.2297	9.01276	0	-10.2297	9.01276		67	1.81085	-12.1447	0	1.81085	-12.1447
50	-10.5195	8.39935	0	-10.5195	8.39935		68	1.71155	-12.1254	0	1.71155	-12.1254
51	-10.1837	8.35614	0	-10.1837	8.35614		69	1.81079	-12.5648	0	1.81079	-12.5648
52	-10.4142	8.18796	0	-10.4142	8.18796		70	1.55334	-12.1924	0	1.55334	-12.1924
53	-9.58746	7.76056	0	-9.58746	7.76056		71	2.24585	-12.5369	0	2.24585	-12.5369
54	-8.34409	6.22836	0	-8.34409	6.22836		72	1.05951	-13.1998	0	1.05951	-13.1998
55	-6.77472	5.92075	0	-6.77472	5.92075		73	4.92932	-11.9739	0	4.92932	-11.9739
56	-4.55627	7.09448	0	-4.55627	7.09448		74	1.0274	-12.5317	0	1.0274	-12.5317
57	-4.51819	5.8382	0	-4.51819	5.8382		75	1.0224	-13.0137	0	1.0224	-13.0137
58	-3.617	5.37851	0	-3.617	5.37851		76	1.53271	-12.4857	0	1.53271	-12.4857
59	-3.47137	4.56158	0	-3.47137	4.56158		77	1.73413	-12.5594	0	1.73413	-12.5594
60	-3.08716	4.18787	0	-3.08716	4.18787		78	0.668579	-12.9731	0	0.668579	-12.9731
61	-2.7254	3.86758	0	-2.7254	3.86758		79	1.16199	-12.4812	0	1.16199	-12.4812
62	-2.73553	2.13828	0	-2.73553	2.13828		80	0.833069	-12.7781	0	0.833069	-12.7781
63	-3.69684	1.61826	0	-3.69684	1.61826		81	0.548096	-13.053	0	0.548096	-13.053
64	-2.91663	0.949219	0	-2.91663	0.949219		82	0.152466	-12.7057	0	0.152466	-12.7057
65	-3.31226	0.69989	0	-3.31226	0.69989		83	-1.22357	-13.1395	0	-1.22357	-13.1395
66	-2.36707	0.752716	0	-2.36707	0.752716		84	-0.857483	-13.3953	0	-0.857483	-13.3953
67	-2.76318	0.118835	0	-2.76318	0.118835		85	-1.23315	-13.3698	0	-1.23315	-13.3698
68	-2.11511	-0.816895	0	-2.11511	-0.816895		86	-1.24799	-13.6087	0	-1.24799	-13.6087
69	-1.97314	-0.891388	0	-1.97314	-0.891388		87	-0.809448	-13.2738	0	-0.809448	-13.2738
70	-2.81689	-2.08548	0	-2.81689	-2.08548		88	-1.34949	-13.5563	0	-1.34949	-13.5563
71	-3.01001	-1.91577	0	-3.01001	-1.91577		89	-2.91101	-13.8098	0	-2.91101	-13.8098
72	-3.6225	-1.80157	0	-3.6225	-1.80157		90	-2.12994	-13.5765	0	-2.12994	-13.5765
73	-3.72906	-3.81815	0	-3.72906	-3.81815		91	-1.9137	-13.7084	0	-1.9137	-13.7084
74	-2.83875	-2.93033	0	-2.83875	-2.93033		92	-2.68872	-13.71	0	-2.68872	-13.71
75	-3.34741	-3.91232	0	-3.34741	-3.91232		93	2.7915	-13.0972	0	2.7915	-13.0972
76	-4.06732	-3.52737	0	-4.06732	-3.52737		94	2.45166	-12.8999	0	2.45166	-12.8999
77	-3.85187	-1.07675	0	-3.85187	-1.07675		95	-2.46741	-13.6027	0	-2.46741	-13.6027
78	-4.51398	-4.547	0	-4.51398	-4.547		96	-2.3689	-13.6655	0	-2.3689	-13.6655
79	-5.76526	-5.74353	0	-5.76526	-5.74353		97	-2.28253	-13.2794	0	-2.28253	-13.2794
80	-6.02649	-3.96317	0	-6.02649	-3.96317		98	2.3609	-13.1451	0	2.3609	-13.1451
81	-6.14801	-3.85822	0	-6.14801	-3.85822		99	2.4071	-13.4304	0	2.4071	-13.4304
82	-6.1499	-4.43698	0	-6.1499	-4.43698		100	2.87061	-13.1533	0	2.87061	-13.1533
83	-6.24017	-3.88986	0	-6.24017	-3.88986		101	-3.14594	-13.9343	0	-3.14594	-13.9343
84	-6.34003	-3.57587	0	-6.34003	-3.57587		102	-3.55579	-14.5734	0	-3.55579	-14.5734
85	-6.90533	-3.44788	0	-6.90533	-3.44788		103	-3.47015	-14.1829	0	-3.47015	-14.1829
86	-6.95398	-3.51205	0	-6.95398	-3.51205		104	-3.92542	-14.7098	0	-3.92542	-14.7098
87	-6.68817	-2.53088	0	-6.68817	-2.53088		105	-3.14636	-13.9954	0	-3.14636	-13.9954
88	-6.4762	-2.20441	0	-6.4762	-2.20441		106	-3.67053	-15.0361	0	-3.67053	-15.0361
89	-6.31561	-1.9603	0	-6.31561	-1.9603		107	-3.05011	-15.2697	0	-3.05011	-15.2697
90	-6.75836	-3.53729	0	-6.75836	-3.53729		108	-4.45453	-15.4169	0	-4.45453	-15.4169
91	-7.06763	-3.50031	0	-7.06763	-3.50031		109	-4.5354	-15.6187	0	-4.5354	-15.6187
92	-7.36371	-2.90176	0	-7.36371	-2.90176		110	-3.29614	-15.5068	0	-3.29614	-15.5068
93	-8.41647	-1.69278	0	-8.41647	-1.69278		111	-3.20825	-16.1354	0	-3.20825	-16.1354
94	-7.85803	-1.10724	0	-7.85803	-1.10724		112	-2.98401	-16.663	0	-2.98401	-16.663
95	-8.42578	-0.174103	0	-8.42578	-0.174103		113	-2.97412	-16.9377	0	-2.97412	-16.9377
96	-8.44385	0.875122	0	-8.44385	0.875122		114	-4.12878	-16.1483	0	-4.12878	-16.1483
97	-8.69278	0.819641	0	-8.69278	0.819641		115	-3.96173	-15.2946	0	-3.96173	-15.2946
98	-8.34497	1.16666	0	-8.34497	1.16666		116	-3.75153	-15.5294	0	-3.75153	-15.5294
99	-8.17871	1.76044	0	-8.17871	1.76044		117	-3.95654	-15.6531	0	-3.95654	-15.6531
100	-7.67169	1.63141	0	-7.67169	1.63141		118	-3.78522	-15.6565	0	-3.78522	-15.6565
101	-7.70657	1.55148	0	-7.70657	1.55148		119	-4.40271	-15.6174	0	-4.40271	-15.6174
102	-7.52527	2.08246	0	-7.52527	2.08246		120	-3.77698	-15.85	0	-3.77698	-15.85
103	-8.17029	1.45529	0	-8.17029	1.45529		121	-3.60248	-16.5611	0	-3.60248	-16.5611
104	-7.90747	2.37869	0	-7.90747	2.37869		122	-3.95654	-16.4029	0	-3.95654	-16.4029
105	-8.0658	2.96725	0	-8.0658	2.96725		123	-4.60858	-15.4651	0	-4.60858	-15.4651
106	-7.43707	3.24994	0	-7.43707	3.24994		124	-4.05902	-15.3039	0	-4.05902	-15.3039
107	-8.12274	4.39145	0	-8.12274	4.39145		125	-4.67957	-15.2007	0	-4.67957	-15.2007
108	-9.18689	4.68628	0	-9.18689	4.68628		126	-4.20428	-15.0605	0	-4.20428	-15.0605
109	-8.46326	4.24359	0	-8.46326	4.24359		127	-3.31201	-15.4423	0	-3.31201	-15.4423
110	-9.22943	4.54156	0	-9.22943	4.54156		128	-3.4967	-15.1194	0	-3.4967	-15.1194
111	-9.25333	4.62363	0	-9.25333	4.62363		129	-3.72046	-14.9333	0	-3.72046	-14.9333
112	-9.22195	4.569	0	-9.22195	4.569		130	-4.16119	-15.154	0	-4.16119	-15.154
113	-8.27017	3.97565	0	-8.27017	3.97565		131	-3.75708	-15.1425	0	-3.75708	-15.1425
114	-8.43991	3.71881	0	-8.43991	3.71881		132	-3.28613	-15.9305	0	-3.28613	-15.9305
115	-8.94421	3.73016	0	-8.94421	3.73016		133	-3.46497	-15.4451	0	-3.46497	-15.4451
116	-8.64157	3.90964	0	-8.64157	3.90964		134	-3.54309	-15.5266	0	-3.54309	-15.5266
117	-9.06744	3.98441	0	-9.06744	3.98441		135	-2.94324	-15.9351	0	-2.94324	-15.9351
118	-8.72876	4.27438	0	-8.72876	4.27438		136	-3.45117	-15.3568	0	-3.45117	-15.3568
119	-8.51239	4.57458	0	-8.51239	4.57458		137	1.54584	-17.6466	0	1.54584	-17.6466
120	-8.93912	2.89813	0	-8.93912	2.89813		138	-3.4104	-16.225	0	-3.4104	-16.225
121	-9.43515	3.30005	0	-9.43515	3.30005		1	0	0	0	0	0
122	-9.6521	3.98337	0	-9.6521	3.98337		2	-0.106812	-0.212341	0	-0.106812	-0.212341
123	-9.72513	5.05276	0	-9.72513	5.05276		3	-1.1369	0.635376	0	-1.1369	0.635376
124	-10.2486	4.14706	0	-10.2486	4.14706		4	-0.963745	0.045105	0	-0.963745	0.045105
125	-10.5832	4.86841	0	-10.5832	4.86841		5	-1.64716	0.266724	0	-1.64716	0.266724
126	-10.4867	4.78665	0	-10.4867	4.78665		6	-1.99792	0.639893	0	-1.99792	0.639893
127	-9.2738	4.24585	0	-9.2738	4.24585		7	-1.4621	0.0298462	0	-1.4621	0.0298462
128	-9.00775	3.58353	0	-9.00775	3.58353		8	-1.4129	0.280212	0	-1.4129	0.280212
129	-8.23096	3.38257	0	-8.23096	3.38257		9	-1.03583	0.0971069	0	-1.03583	0.0971069
130	-10.6107	3.82178	0	-10.6107	3.82178		10	-0.739197	0.174011	0	-0.739197	0.174011
131	-11.3932	3.90161	0	-11.3932	3.90161		11	-2.30566	-0.204773	0	-2.30566	-0.204773
132	-11.7764	4.99744	0	-11.7764	4.99744		12	-2.409	-0.737305	0	-2.409	-0.737305
133	-12.5386	6.13303	0	-12.5386	6.13303		13	-2.99561	0.487671	0	-2.99561	0.487671
134	-12.0629	4.75644	0	-12.0629	4.75644		14	-3.49658	0.827881	0	-3.49658	0.827881
135	-10.9014	6.89099	0	-10.9014	6.89099		15	-4.13287	0.737366	0	-4.13287	0.737366
136	-11.457	7.2399	0	-11.457	7.2399		16	-4.26215	1.25519	0	-4.26215	1.25519
1	0	0	0	0	0		17	-4.31873	1.1947	0	-4.31873	1.1947
2	-0.257233	-0.168457	0	-0.257233	-0.168457		18	-4.61963	1.29297	0	-4.61963	1.29297
3	0.0158386	0.965973	0	0.0158386	0.965973		19	-4.94983	1.12122	0	-4.94983	1.12122
4	0.0158386	0.332336	0	0.0158386	0.332336		20	-5.7428	0.925537	0	-5.7428	0.925537
5	-0.43103	-0.509949	0	-0.43103	-0.509949		21	-6.08551	1.07623	0	-6.08551	1.07623
6	-0.245697	0.609009	0	-0.245697	0.609009		22	-5.55273	0.920471	0	-5.55273	0.920471
7	0.143005	0.182556	0	0.143005	0.182556		23	-6.21667	0.878906	0	-6.21667	0.878906
8	0.972473	0.879852	0	0.972473	0.879852		24	-5.8241	0.731445	0	-5.8241	0.731445
9	1.21146	1.69519	0	1.21146	1.69519		25	-6.06812	1.05579	0	-6.06812	1.05579
13	1.30283	1.41068	0	1.30283	1.41068		26	-6.29767	1.10437	0	-6.29767	1.10437
16	1.10443	0.974121	0	1.10443	0.974121		27	-6.34784	0.863586	0	-6.34784	0.863586
17	1.59769	0.726715	0	1.59769	0.726715		28	-6.90985	1.11969	0	-6.90985	1.11969
18	2.01813	1.02908	0	2.01813	1.02908		29	-6.28088	0.884949	0	-6.28088	0.884949
19	1.68369	0.429657	0	1.68369	0.429657		30	-6.4436	1.22717	0	-6.4436	1.22717
22	2.36047	0.437805	0	2.36047	0.437805		31	-6.50562	1.3653	0	-6.50562	1.3653
26	2.6463	0.511475	0	2.6463	0.511475		32	-7.0871	2.0528	0	-7.0871	2.0528
31	2.30228	-0.364746	0	2.30228	-0.364746		33	-7.27997	2.00647	0	-7.27997	2.00647
32	2.97498	0.57608	0	2.97498	0.57608		34	-7.26056	1.76971	0	-7.26056	1.76971
41	2.14999	0.00747681	0	2.14999	0.00747681		35	-4.4859	-0.711975	0	-4.4859	-0.711975
47	2.59586	-0.995544	0	2.59586	-0.995544		36	-7.48352	1.52942	0	-7.48352	1.52942
49	2.60889	-1.0553	0	2.60889	-1.0553		37	-7.77426	1.33392	0	-7.77426	1.33392
54	3.16351	-0.814697	0	3.16351	-0.814697		38	-7.45587	1.73358	0	-7.45587	1.73358
55	4.26691	-0.514435	0	4.26691	-0.514435		39	-8.18604	2.08124	0	-8.18604	2.08124
56	3.4581	-0.38678	0	3.4581	-0.38678		40	-8.48209	2.15668	0	-8.48209	2.15668
62	2.6705	-1.31918	0	2.6705	-1.31918		41	-8.83652	2.14368	0	-8.83652	2.14368
63	2.43851	-1.03485	0	2.43851	-1.03485		42	-8.4848	1.78192	0	-8.4848	1.78192
64	2.74564	-0.82843	0	2.74564	-0.82843		43	-4.89728	-0.143005	0	-4.89728	-0.143005
65	3.29321	-1.36121	0	3.29321	-1.36121		44	-8.64526	2.07983	0	-8.64526	2.07983
67	3.08408	-2.13766	0	3.08408	-2.13766		45	-8.98679	2.73169	0	-8.98679	2.73169
68	3.871	-1.34912	0	3.871	-1.34912		46	-8.81	2.82953	0	-8.81	2.82953
72	3.39569	-1.56378	0	3.39569	-1.56378		47	-9.23215	3.24701	0	-9.23215	3.24701
73	3.45529	-2.43796	0	3.45529	-2.43796		48	-8.79004	3.37042	0	-8.79004	3.37042
77	3.80798	-1.9418	0	3.80798	-1.9418		49	-9.18637	2.55157	0	-9.18637	2.55157
78	4.24097	-1.91473	0	4.24097	-1.91473		50	-9.21484	3.01868	0	-9.21484	3.01868
79	4.13086	-2.23053	0	4.13086	-2.23053		51	-9.95062	4.58624	0	-9.95062	4.58624
84	4.66074	-1.31296	0	4.66074	-1.31296		52	-8.6405	3.42474	0	-8.6405	3.42474
86	4.50235	-2.60187	0	4.50235	-2.60187		53	-8.74173	3.55084	0	-8.74173	3.55084
87	4.23215	-2.22092	0	4.23215	-2.22092		54	-9.08606	2.93274	0	-9.08606	2.93274
88	4.95721	-2.13785	0	4.95721	-2.13785		55	-9.40448	3.10583	0	-9.40448	3.10583
1	0	0	0	0	0		56	-10.1558	4.16235	0	-10.1558	4.16235
2	1.00381	0.282257	0	1.00381	0.282257		57	-9.10849	2.57922	0	-9.10849	2.57922
3	0.950439	-0.587494	0	0.950439	-0.587494		58	-9.75388	2.98267	0	-9.75388	2.98267
4	0.80191	-0.929199	0	0.80191	-0.929199		59	-9.43982	2.73346	0	-9.43982	2.73346
5	1.10608	-0.0881653	0	1.10608	-0.0881653		60	-9.15491	2.40277	0	-9.15491	2.40277
6	1.37927	0.331299	0	1.37927	0.331299		61	-9.56024	3.03369	0	-9.56024	3.03369
7	2.30234	0.501343	0	2.30234	0.501343		62	-5.71234	-0.925476	0	-5.71234	-0.925476
8	3.27246	0.574066	0	3.27246	0.574066		63	-5.41577	-0.346069	0	-5.41577	-0.346069
9	5.263	0.071228	0	5.263	0.071228		64	-5.59332	-0.33667	0	-5.59332	-0.33667
10	5.39111	-0.0602722	0	5.39111	-0.0602722		65	-5.30182	-0.450745	0	-5.30182	-0.450745
11	0.961609	-1.01144	0	0.961609	-1.01144		66	-5.31201	-0.0466309	0	-5.31201	-0.0466309
12	5.66235	-0.275452	0	5.66235	-0.275452		67	-10.2855	3.6402	0	-10.2855	3.6402
13	5.66516	-0.654663	0	5.66516	-0.654663		68	-10.8265	3.8299	0	-10.8265	3.8299
14	4.14185	-2.0394	0	4.14185	-2.0394		69	-10.7553	4.29761	0	-10.7553	4.29761
15	3.80261	-1.94092	0	3.80261	-1.94092		70	-11.7535	4.8913	0	-11.7535	4.8913
16	6.58405	0.0293884	0	6.58405	0.0293884		71	-11.7337	5.26416	0	-11.7337	5.26416
17	7.23465	-0.0175171	0	7.23465	-0.0175171		72	-11.8677	5.7478	0	-11.8677	5.7478
18	7.3111	-0.132843	0	7.3111	-0.132843		73	-11.672	5.51605	0	-11.672	5.51605
19	7.84186	-0.861908	0	7.84186	-0.861908		74	-10.8961	5.06342	0	-10.8961	5.06342
20	8.11932	-0.899902	0	8.11932	-0.899902		75	-6.98816	1.9599	0	-6.98816	1.9599
21	8.78766	-1.06863	0	8.78766	-1.06863		76	-11.599	5.03162	0	-11.599	5.03162
22	8.42755	-0.999725	0	8.42755	-0.999725		77	-11.7172	5.40582	0	-11.7172	5.40582
23	8.5874	-1.43823	0	8.5874	-1.43823		78	-11.4822	5.54987	0	-11.4822	5.54987
24	8.00867	-1.84436	0	8.00867	-1.84436		79	-11.6223	5.40161	0	-11.6223	5.40161
25	8.09363	-2.14578	0	8.09363	-2.14578		80	-11.6747	5.22675	0	-11.6747	5.22675
26	8.28937	-2.17053	0	8.28937	-2.17053		81	-7.16962	0.825623	0	-7.16962	0.825623
27	8.54645	-1.83948	0	8.54645	-1.83948		82	-12.4887	5.31189	0	-12.4887	5.31189
28	8.82184	-2.1611	0	8.82184	-2.1611		83	-12.4082	5.01562	0	-12.4082	5.01562
29	8.93207	-1.81955	0	8.93207	-1.81955		84	-9.59842	1.93341	0	-9.59842	1.93341
30	9.96417	-2.26743	0	9.96417	-2.26743		85	-9.80457	2.06531	0	-9.80457	2.06531
31	10.3943	-2.10336	0	10.3943	-2.10336		86	-12.6032	4.71509	0	-12.6032	4.71509
32	10.0265	-2.60681	0	10.0265	-2.60681		87	-13.5558	5.17224	0	-13.5558	5.17224
33	10.648	-2.3244	0	10.648	-2.3244		88	-13.2323	4.35791	0	-13.2323	4.35791
34	10.6781	-2.43387	0	10.6781	-2.43387		89	-13.7061	4.64069	0	-13.7061	4.64069
35	10.0164	-3.18091	0	10.0164	-3.18091		90	-13.708	4.73749	0	-13.708	4.73749
36	9.99994	-2.97388	0	9.99994	-2.97388		91	-14.4464	4.57361	0	-14.4464	4.57361
37	10.2422	-2.82996	0	10.2422	-2.82996		92	-14.884	3.29596	0	-14.884	3.29596
38	10.0915	-3.1564	0	10.0915	-3.1564		93	-14.5826	3.67877	0	-14.5826	3.67877
39	10.9303	-3.13821	0	10.9303	-3.13821		94	-14.1905	3.69775	0	-14.1905	3.69775
40	10.0206	-3.20279	0	10.0206	-3.20279		95	-14.6228	4.22284	0	-14.6228	4.22284
41	10.1276	-2.84842	0	10.1276	-2.84842		96	-14.8282	4.20923	0	-14.8282	4.20923
42	10.3659	-3.15726	0	10.3659	-3.15726		97	-16.2063	4.66895	0	-16.2063	4.66895
43	10.5314	-3.65756	0	10.5314	-3.65756		98	-16.0471	5.1972	0	-16.0471	5.1972
44	10.2722	-4.07468	0	10.2722	-4.07468		99	-15.9136	4.82739	0	-15.9136	4.82739
45	10.217	-3.78836	0	10.217	-3.78836		100	-15.7034	5.1427	0	-15.7034	5.1427
46	9.97928	-4.4014	0	9.97928	-4.4014		101	-15.337	4.97418	0	-15.337	4.97418
47	10.3099	-4.59698	0	10.3099	-4.59698		102	-12.9445	4.95172	0	-12.9445	4.95172
48	9.93268	-3.91977	0	9.93268	-3.91977		103	-15.2588	5.01349	0	-15.2588	5.01349
49	10.8272	-3.98059	0	10.8272	-3.98059		104	-10.005	1.9375	0	-10.005	1.9375
50	9.62128	-3.57141	0	9.62128	-3.57141		105	-10.0809	2.0047	0	-10.0809	2.0047
51	9.56067	-2.91907	0	9.56067	-2.91907		106	-15.7463	6.77637	0	-15.7463	6.77637
52	9.26071	-2.75793	0	9.26071	-2.75793		107	-9.55966	2.41595	0	-9.55966	2.41595
53	8.27472	-2.81607	0	8.27472	-2.81607		108	-9.25467	2.3418	0	-9.25467	2.3418
54	8.28186	-4.00781	0	8.28186	-4.00781		109	-9.00809	1.86212	0	-9.00809	1.86212
55	8.91443	-5.05591	0	8.91443	-5.05591		110	-8.82596	1.98505	0	-8.82596	1.98505
56	9.32825	-5.71326	0	9.32825	-5.71326		111	-9.9216	3.32709	0	-9.9216	3.32709
57	8.97342	-4.42371	0	8.97342	-4.42371		112	-7.17133	1.32196	0	-7.17133	1.32196
58	8.81155	-4.63925	0	8.81155	-4.63925		113	-6.81854	1.35107	0	-6.81854	1.35107
59	9.12296	-6.95871	0	9.12296	-6.95871		114	-7.76501	1.69928	0	-7.76501	1.69928
60	7.92975	-7.22598	0	7.92975	-7.22598		115	-8.57373	3.4809	0	-8.57373	3.4809
61	8.38489	-7.05743	0	8.38489	-7.05743		116	-7.84344	2.10889	0	-7.84344	2.10889
62	8.71509	-7.0061	0	8.71509	-7.0061		117	-8.6857	2.36346	0	-8.6857	2.36346
63	8.73267	-6.57132	0	8.73267	-6.57132		118	-8.48325	1.55823	0	-8.48325	1.55823
64	8.38464	-5.48288	0	8.38464	-5.48288		119	-8.28027	1.61951	0	-8.28027	1.61951
65	8.37152	-6.67007	0	8.37152	-6.67007		120	-7.68375	0.204163	0	-7.68375	0.204163
66	8.16895	-6.15533	0	8.16895	-6.15533		121	-12.6582	6.09515	0	-12.6582	6.09515
67	7.57806	-6.35733	0	7.57806	-6.35733		122	-12.7076	5.96436	0	-12.7076	5.96436
68	6.83878	-6.34256	0	6.83878	-6.34256		123	-7.64859	0.25531	0	-7.64859	0.25531
69	7.24759	-6.6705	0	7.24759	-6.6705		124	-13.7432	6.12061	0	-13.7432	6.12061
70	6.7514	-5.94672	0	6.7514	-5.94672		125	-13.4595	6.82709	0	-13.4595	6.82709
71	6.6777	-5.74841	0	6.6777	-5.74841		126	-13.3688	6.27753	0	-13.3688	6.27753
72	7.74533	-5.79126	0	7.74533	-5.79126		127	-8.26117	0.922119	0	-8.26117	0.922119
73	6.6167	-5.50305	0	6.6167	-5.50305		128	-7.94843	0.745972	0	-7.94843	0.745972
74	5.10834	-5.30167	0	5.10834	-5.30167		129	-13.8191	6.87109	0	-13.8191	6.87109
75	5.12015	-4.4877	0	5.12015	-4.4877		130	-13.3446	6.29529	0	-13.3446	6.29529
76	5.12485	-4.47134	0	5.12485	-4.47134		131	-12.3317	6.15399	0	-12.3317	6.15399
77	5.47644	-4.68188	0	5.47644	-4.68188		132	-12.7023	6.19336	0	-12.7023	6.19336
78	4.82156	-3.87579	0	4.82156	-3.87579		133	-12.4637	6.13385	0	-12.4637	6.13385
79	5.88898	-4.12122	0	5.88898	-4.12122		134	-12.4065	6.03857	0	-12.4065	6.03857
80	5.98773	-4.19815	0	5.98773	-4.19815		135	-12.2764	6.62354	0	-12.2764	6.62354
81	5.60272	-4.00739	0	5.60272	-4.00739		136	-13.9569	7.95111	0	-13.9569	7.95111
82	5.83951	-4.05258	0	5.83951	-4.05258		137	-11.537	4.67126	0	-11.537	4.67126
83	5.49942	-3.19095	0	5.49942	-3.19095		138	-11.6792	5.62518	0	-11.6792	5.62518
84	6.94516	-3.45175	0	6.94516	-3.45175		1	0	0	0	0	0
85	6.50635	-4.07681	0	6.50635	-4.07681		2	-0.196777	-0.261292	0	-0.196777	-0.261292
86	6.13986	-3.72571	0	6.13986	-3.72571		3	-0.19397	-0.297119	0	-0.19397	-0.297119
87	5.91812	-3.55234	0	5.91812	-3.55234		4	-0.121643	-0.745544	0	-0.121643	-0.745544
88	5.63159	-3.26407	0	5.63159	-3.26407		5	0.228333	-1.45129	0	0.228333	-1.45129
89	5.00522	-2.59091	0	5.00522	-2.59091		6	-0.902039	-0.108459	0	-0.902039	-0.108459
90	5.24368	-3.12686	0	5.24368	-3.12686		7	-0.0302124	-1.80579	0	-0.0302124	-1.80579
91	6.01251	-3.23627	0	6.01251	-3.23627		8	0.0839233	-2.71899	0	0.0839233	-2.71899
92	5.15732	-3.10107	0	5.15732	-3.10107		9	-0.0389404	-1.12408	0	-0.0389404	-1.12408
93	5.41977	-3.85428	0	5.41977	-3.85428		10	-0.37738	-1.25629	0	-0.37738	-1.25629
94	5.79034	-3.91205	0	5.79034	-3.91205		11	0.223389	-2.41461	0	0.223389	-2.41461
95	5.26089	-4.36734	0	5.26089	-4.36734		12	-0.688782	-3.9541	0	-0.688782	-3.9541
96	5.69327	-3.93082	0	5.69327	-3.93082		13	-0.667908	-4.04901	0	-0.667908	-4.04901
97	5.92139	-4.22659	0	5.92139	-4.22659		14	-0.966675	-4.07727	0	-0.966675	-4.07727
98	6.1713	-4.04364	0	6.1713	-4.04364		15	-0.600586	-4.62067	0	-0.600586	-4.62067
99	5.84369	-3.98141	0	5.84369	-3.98141		16	-0.117249	-4.18335	0	-0.117249	-4.18335
100	5.3472	-3.57178	0	5.3472	-3.57178		17	0.0567627	-4.67029	0	0.0567627	-4.67029
101	5.18753	-3.58133	0	5.18753	-3.58133		18	-0.312988	-3.82745	0	-0.312988	-3.82745
102	5.70721	-3.45984	0	5.70721	-3.45984		19	0.597961	-4.56006	0	0.597961	-4.56006
103	6.75983	-3.07629	0	6.75983	-3.07629		20	0.230774	-4.17755	0	0.230774	-4.17755
104	6.50522	-3.45807	0	6.50522	-3.45807		21	0.112061	-4.08881	0	0.112061	-4.08881
105	5.6637	-3.71564	0	5.6637	-3.71564		22	0.335266	-4.3587	0	0.335266	-4.3587
106	5.28522	-4.2562	0	5.28522	-4.2562		23	-0.17804	-3.68439	0	-0.17804	-3.68439
107	5.25815	-3.95932	0	5.25815	-3.95932		24	-0.432312	-3.45715	0	-0.432312	-3.45715
108	5.59372	-3.5741	0	5.59372	-3.5741		25	-0.716125	-3.03595	0	-0.716125	-3.03595
109	5.95972	-3.35938	0	5.95972	-3.35938		26	-0.849365	-3.16479	0	-0.849365	-3.16479
110	5.66351	-2.62955	0	5.66351	-2.62955		27	-1.03223	-2.78992	0	-1.03223	-2.78992
111	5.49112	-2.55746	0	5.49112	-2.55746		28	-0.872803	-2.82654	0	-0.872803	-2.82654
112	5.94562	-3.15085	0	5.94562	-3.15085		29	-1.57361	-2.35925	0	-1.57361	-2.35925
113	5.75858	-3.78091	0	5.75858	-3.78091		30	-1.34296	-2.67126	0	-1.34296	-2.67126
114	6.08429	-3.10699	0	6.08429	-3.10699		31	-1.19702	-2.45361	0	-1.19702	-2.45361
115	6.94141	-2.71613	0	6.94141	-2.71613		32	-1.36456	-2.46985	0	-1.36456	-2.46985
116	6.83417	-2.86105	0	6.83417	-2.86105		33	-2.06226	-1.78375	0	-2.06226	-1.78375
117	6.69498	-2.49039	0	6.69498	-2.49039		34	-1.96991	-2.18231	0	-1.96991	-2.18231
118	6.58862	-3.03207	0	6.58862	-3.03207		35	-2.19958	-1.88202	0	-2.19958	-1.88202
119	6.38715	-4.52921	0	6.38715	-4.52921		36	-2.19958	-1.71405	0	-2.19958	-1.71405
120	6.32846	-4.11545	0	6.32846	-4.11545		37	-2.15564	-2.0235	0	-2.15564	-2.0235
121	6.67166	-3.93387	0	6.67166	-3.93387		38	-2.00946	-2.16968	0	-2.00946	-2.16968
122	6.90829	-3.60434	0	6.90829	-3.60434		39	-2.14801	-1.79651	0	-2.14801	-1.79651
123	6.89746	-3.01968	0	6.89746	-3.01968		40	-2.21515	-1.47827	0	-2.21515	-1.47827
124	6.86591	-3.04776	0	6.86591	-3.04776		41	-2.31561	-1.07294	0	-2.31561	-1.07294
125	6.71805	-3.34576	0	6.71805	-3.34576		42	-1.86719	-1.38361	0	-1.86719	-1.38361
126	7.14853	-3.02332	0	7.14853	-3.02332		43	-2.5069	-0.901611	0	-2.5069	-0.901611
127	7.45108	-3.11893	0	7.45108	-3.11893		44	-1.60321	-1.8457	0	-1.60321	-1.8457
128	7.18918	-2.85745	0	7.18918	-2.85745		45	-2.47198	-0.718018	0	-2.47198	-0.718018
129	7.08829	-3.2131	0	7.08829	-3.2131		46	-2.54242	-0.438477	0	-2.54242	-0.438477
130	6.87619	-2.96866	0	6.87619	-2.96866		47	-2.86072	-0.0525513	0	-2.86072	-0.0525513
131	6.55887	-2.99893	0	6.55887	-2.99893		48	-2.22211	-0.423462	0	-2.22211	-0.423462
132	6.50531	-3.05161	0	6.50531	-3.05161		49	-1.73889	-0.789612	0	-1.73889	-0.789612
133	7.56036	-4.23758	0	7.56036	-4.23758		50	-2.09668	-0.554504	0	-2.09668	-0.554504
134	8.49521	-3.58264	0	8.49521	-3.58264		51	-2.25244	-0.357788	0	-2.25244	-0.357788
135	9.66547	-3.60818	0	9.66547	-3.60818		52	-2.56635	0.202148	0	-2.56635	0.202148
136	10.7791	-4.70691	0	10.7791	-4.70691		53	-2.33881	-0.134216	0	-2.33881	-0.134216
1	0	0	0	0	0		54	-2.34894	0.315002	0	-2.34894	0.315002
2	0.00372314	-0.185211	0	0.00372314	-0.185211		55	-2.68701	0.718445	0	-2.68701	0.718445
3	-0.502075	-0.58667	0	-0.502075	-0.58667		56	-3.67535	1.47864	0	-3.67535	1.47864
4	-1.01385	-0.251221	0	-1.01385	-0.251221		57	-3.43201	1.58301	0	-3.43201	1.58301
5	-1.10492	0.473846	0	-1.10492	0.473846		58	-3.20215	1.67535	0	-3.20215	1.67535
6	-0.709961	1.04651	0	-0.709961	1.04651		59	-3.90948	2.63013	0	-3.90948	2.63013
7	-0.586243	1.13794	0	-0.586243	1.13794		60	-3.51556	1.88318	0	-3.51556	1.88318
8	-0.902527	0.573822	0	-0.902527	0.573822		61	-3.68237	2.46167	0	-3.68237	2.46167
9	-0.444275	0.863373	0	-0.444275	0.863373		62	-3.56671	2.55188	0	-3.56671	2.55188
10	-0.644409	0.744263	0	-0.644409	0.744263		63	-3.55811	2.99652	0	-3.55811	2.99652
11	-0.693909	1.26221	0	-0.693909	1.26221		64	-3.74921	3.24829	0	-3.74921	3.24829
12	-0.522095	1.20432	0	-0.522095	1.20432		65	-3.73779	3.01233	0	-3.73779	3.01233
13	0.190186	2.04248	0	0.190186	2.04248		66	-2.99078	3.03265	0	-2.99078	3.03265
14	0.402893	2.60266	0	0.402893	2.60266		67	-2.92053	3.34229	0	-2.92053	3.34229
15	-1.60345	1.55591	0	-1.60345	1.55591		68	-3.40234	4.26477	0	-3.40234	4.26477
16	-1.47272	2.44632	0	-1.47272	2.44632		69	-3.89465	4.71326	0	-3.89465	4.71326
17	-1.26086	2.92245	0	-1.26086	2.92245		70	-3.13782	4.57788	0	-3.13782	4.57788
18	-1.78113	3.1228	0	-1.78113	3.1228		71	-4.04254	5.87781	0	-4.04254	5.87781
19	-2.18353	2.93271	0	-2.18353	2.93271		72	-4.45526	5.8938	0	-4.45526	5.8938
20	-2.13098	2.23953	0	-2.13098	2.23953		73	-4.38568	5.5672	0	-4.38568	5.5672
21	-2.48962	2.35254	0	-2.48962	2.35254		74	-4.45038	5.80585	0	-4.45038	5.80585
22	-3.15106	1.26483	0	-3.15106	1.26483		75	-4.75323	5.94885	0	-4.75323	5.94885
23	-4.30042	0.65976	0	-4.30042	0.65976		76	-5.09949	6.76752	0	-5.09949	6.76752
24	-5.43964	-0.18161	0	-5.43964	-0.18161		77	-4.5152	7.10095	0	-4.5152	7.10095
25	-5.56818	0.250793	0	-5.56818	0.250793		78	-4.37628	7.34229	0	-4.37628	7.34229
26	-6.53064	-0.462982	0	-6.53064	-0.462982		79	-4.90826	7.72272	0	-4.90826	7.72272
27	-6.54205	-1.86053	0	-6.54205	-1.86053		80	-3.93463	7.90131	0	-3.93463	7.90131
28	-6.63416	-2.42599	0	-6.63416	-2.42599		81	-4.30249	7.8468	0	-4.30249	7.8468
29	-7.03278	-3.56531	0	-7.03278	-3.56531		82	-4.43964	8.11273	0	-4.43964	8.11273
30	-7.4552	-4.8403	0	-7.4552	-4.8403		83	-4.20068	8.29004	0	-4.20068	8.29004
31	-7.16602	-4.85571	0	-7.16602	-4.85571		84	-4.40576	8.07367	0	-4.40576	8.07367
32	-7.86945	-5.35352	0	-7.86945	-5.35352		85	-4.07904	8.742	0	-4.07904	8.742
33	-6.88879	-4.77747	0	-6.88879	-4.77747		86	-4.177	8.70587	0	-4.177	8.70587
34	-6.79382	-5.46249	0	-6.79382	-5.46249		87	-4.56537	9.96045	0	-4.56537	9.96045
35	-6.52051	-5.58456	0	-6.52051	-5.58456		88	-4.88538	9.91876	0	-4.88538	9.91876
36	-6.44116	-5.2587	0	-6.44116	-5.2587		89	-4.90802	10.0995	0	-4.90802	10.0995
37	-6.22864	-5.35025	0	-6.22864	-5.35025		90	-5.28949	10.2922	0	-5.28949	10.2922
38	-6.07422	-5.70963	0	-6.07422	-5.70963		91	-5.66187	10.2922	0	-5.66187	10.2922
39	-6.78784	-5.47461	0	-6.78784	-5.47461		92	-5.75732	10.8446	0	-5.75732	10.8446
40	-7.48969	-6.75143	0	-7.48969	-6.75143		93	-6.24866	11.3092	0	-6.24866	11.3092
41	-7.53174	-7.3732	0	-7.53174	-7.3732		94	-6.09863	11.7053	0	-6.09863	11.7053
42	-8.73297	-7.10843	0	-8.73297	-7.10843		95	-6.3562	11.1212	0	-6.3562	11.1212
43	-8.81042	-7.09656	0	-8.81042	-7.09656		96	-6.64819	12.2209	0	-6.64819	12.2209
44	-8.78717	-6.91693	0	-8.78717	-6.91693		97	-5.97009	12.1898	0	-5.97009	12.1898
45	-9.3985	-7.41983	0	-9.3985	-7.41983		98	-3.22095	10.1232	0	-3.22095	10.1232
46	-9.99481	-7.6937	0	-9.99481	-7.6937		99	-6.797	12.2646	0	-6.797	12.2646
47	-9.58453	-7.49237	0	-9.58453	-7.49237		100	-2.87372	11.5721	0	-2.87372	11.5721
48	-8.57379	-9.62848	0	-8.57379	-9.62848		101	-3.12634	11.6116	0	-3.12634	11.6116
49	-9.19128	-8.22284	0	-9.19128	-8.22284		102	-3.39923	10.8297	0	-3.39923	10.8297
50	-8.81372	-8.96109	0	-8.81372	-8.96109		103	-3.83289	10.4974	0	-3.83289	10.4974
51	-8.22626	-9.33276	0	-8.22626	-9.33276		104	-4.33588	10.5172	0	-4.33588	10.5172
52	-8.83502	-9.07852	0	-8.83502	-9.07852		105	-2.89441	10.4429	0	-2.89441	10.4429
53	-8.70483	-10.2313	0	-8.70483	-10.2313		106	-2.10815	10.0276	0	-2.10815	10.0276
54	-8.98279	-9.246	0	-8.98279	-9.246		107	-7.75427	13.0911	0	-7.75427	13.0911
55	-8.3642	-9.41315	0	-8.3642	-9.41315		108	-2.71625	10.0162	0	-2.71625	10.0162
56	-9.17999	-9.35577	0	-9.17999	-9.35577		118	-11.8359	13.272	0	-11.8359	13.272
57	-8.06549	-9.49438	0	-8.06549	-9.49438		119	-11.6701	13.4178	0	-11.6701	13.4178
58	-8.4408	-10.0155	0	-8.4408	-10.0155		120	-11.6537	13.0673	0	-11.6537	13.0673
59	-7.84314	-9.78915	0	-7.84314	-9.78915		121	-12.6357	13.2441	0	-12.6357	13.2441
60	-9.11304	-9.47748	0	-9.11304	-9.47748		122	-14.219	13.9679	0	-14.219	13.9679
61	-7.96844	-9.2254	0	-7.96844	-9.2254		123	-21.4888	17.5082	0	-21.4888	17.5082
62	-7.8255	-9.27295	0	-7.8255	-9.27295		124	-22.5778	17.8437	0	-22.5778	17.8437
63	-8.37421	-9.70938	0	-8.37421	-9.70938		125	-23.4548	17.5161	0	-23.4548	17.5161
64	-9.29102	-10.3795	0	-9.29102	-10.3795		126	-23.893	17.7852	0	-23.893	17.7852
65	-9.6571	-11.0368	0	-9.6571	-11.0368		127	-22.0933	15.1017	0	-22.0933	15.1017
66	-9.98883	-11.9288	0	-9.98883	-11.9288		128	-25.0596	18.7733	0	-25.0596	18.7733
67	-9.65704	-12.3931	0	-9.65704	-12.3931		129	-24.8627	18.8353	0	-24.8627	18.8353
68	-9.00537	-11.6307	0	-9.00537	-11.6307		130	-25.4201	19.1057	0	-25.4201	19.1057
69	-9.59003	-12.161	0	-9.59003	-12.161		131	-25.7939	19.262	0	-25.7939	19.262
70	-3.79657	-8.69766	0	-3.79657	-8.69766		132	-25.9802	19.8636	0	-25.9802	19.8636
71	-9.80249	-12.0903	0	-9.80249	-12.0903		133	-26.238	20.2131	0	-26.238	20.2131
72	-3.15753	-9.38004	0	-3.15753	-9.38004		134	-27.372	21.6748	0	-27.372	21.6748
73	-3.70563	-9.19827	0	-3.70563	-9.19827		135	-26.8115	21.3668	0	-26.8115	21.3668
74	-4.04565	-8.9357	0	-4.04565	-8.9357		136	-27.4955	21.8687	0	-27.4955	21.8687
78	-7.96649	-7.32199	0	-7.96649	-7.32199		137	-27.7147	21.4195	0	-27.7147	21.4195
79	-8.68378	-7.66098	0	-8.68378	-7.66098		138	-28.1522	21.5084	0	-28.1522	21.5084
80	-13.7813	-10.9969	0	-13.7813	-10.9969		1	0	0	0	0	0
81	-10.1042	-7.2338	0	-10.1042	-7.2338		2	-0.161377	-0.0783386	0	-0.161377	-0.0783386
82	-10.7495	-6.48212	0	-10.7495	-6.48212		3	-0.588409	-0.0800476	0	-0.588409	-0.0800476
83	-11.4549	-6.64017	0	-11.4549	-6.64017		4	-0.0371094	0.0508728	0	-0.0371094	0.0508728
84	-16.7099	-10.5661	0	-16.7099	-10.5661		5	0.151245	-0.438782	0	0.151245	-0.438782
85	-16.973	-10.4023	0	-16.973	-10.4023		6	-0.285675	-0.699829	0	-0.285675	-0.699829
86	-17.4952	-10.6883	0	-17.4952	-10.6883		7	-0.223541	-0.552307	0	-0.223541	-0.552307
87	-17.8766	-10.8904	0	-17.8766	-10.8904		8	-0.148407	-1.10382	0	-0.148407	-1.10382
88	-17.8578	-10.6507	0	-17.8578	-10.6507		9	-0.545593	-1.23917	0	-0.545593	-1.23917
89	-18.0782	-10.2661	0	-18.0782	-10.2661		10	-1.14822	-1.47458	0	-1.14822	-1.47458
90	-18.8181	-11.2135	0	-18.8181	-11.2135		11	-1.44388	-1.44522	0	-1.44388	-1.44522
91	-19.33	-12.0329	0	-19.33	-12.0329		12	-1.95624	-1.215	0	-1.95624	-1.215
92	-18.5691	-12.4974	0	-18.5691	-12.4974		13	-0.905487	-1.13583	0	-0.905487	-1.13583
93	-19.1288	-13.4405	0	-19.1288	-13.4405		14	-2.48047	-1.20395	0	-2.48047	-1.20395
94	-18.8734	-13.3733	0	-18.8734	-13.3733		15	-3.24445	-1.13702	0	-3.24445	-1.13702
95	-19.4081	-13.7104	0	-19.4081	-13.7104		16	-3.45099	-1.25504	0	-3.45099	-1.25504
96	-19.5147	-15.1237	0	-19.5147	-15.1237		17	-3.71347	-1.42337	0	-3.71347	-1.42337
97	-19.0864	-14.659	0	-19.0864	-14.659		18	-3.82477	-1.0231	0	-3.82477	-1.0231
98	-18.8229	-13.9773	0	-18.8229	-13.9773		19	-4.67432	-0.632904	0	-4.67432	-0.632904
99	-18.6855	-14.6915	0	-18.6855	-14.6915		20	-6.08838	-0.634766	0	-6.08838	-0.634766
100	-18.9667	-14.7806	0	-18.9667	-14.7806		21	-6.83948	-1.22223	0	-6.83948	-1.22223
101	-18.9622	-11.5818	0	-18.9622	-11.5818		22	-7.12744	-0.993073	0	-7.12744	-0.993073
102	-17.5816	-8.96893	0	-17.5816	-8.96893		23	-7.32394	-1.27588	0	-7.32394	-1.27588
103	-19.0196	-13.0628	0	-19.0196	-13.0628		24	-7.8017	-1.11581	0	-7.8017	-1.11581
104	-19.1873	-12.7833	0	-19.1873	-12.7833		25	-8.25446	-1.33228	0	-8.25446	-1.33228
105	-18.6658	-14.1841	0	-18.6658	-14.1841		26	-8.76761	-2.08139	0	-8.76761	-2.08139
106	-19.1393	-16.1131	0	-19.1393	-16.1131		27	-9.34579	-1.88519	0	-9.34579	-1.88519
107	-16.9871	-15.2159	0	-16.9871	-15.2159		28	-9.33447	-2.29602	0	-9.33447	-2.29602
108	-18.0625	-17.5708	0	-18.0625	-17.5708		29	-9.16644	-2.12918	0	-9.16644	-2.12918
109	-17.0883	-16.6286	0	-17.0883	-16.6286		30	-9.09915	-2.16547	0	-9.09915	-2.16547
110	-16.6243	-17.1588	0	-16.6243	-17.1588		31	-10.1137	-1.91217	0	-10.1137	-1.91217
111	-17.4937	-18.3955	0	-17.4937	-18.3955		32	-10.0614	-2.8237	0	-10.0614	-2.8237
112	-15.7142	-16.8012	0	-15.7142	-16.8012		33	-10.348	-2.45389	0	-10.348	-2.45389
113	-14.7612	-17.2474	0	-14.7612	-17.2474		34	-10.3718	-2.42914	0	-10.3718	-2.42914
114	-15.2601	-18.8908	0	-15.2601	-18.8908		35	-10.578	-2.5975	0	-10.578	-2.5975
115	-14.847	-17.3242	0	-14.847	-17.3242		36	-10.8094	-2.60483	0	-10.8094	-2.60483
116	-16.6624	-17.977	0	-16.6624	-17.977		37	-10.7422	-2.76892	0	-10.7422	-2.76892
117	-17.8514	-18.9976	0	-17.8514	-18.9976		38	-10.8488	-2.54193	0	-10.8488	-2.54193
118	-18.8063	-20.0493	0	-18.8063	-20.0493		39	-11.0598	-3.21445	0	-11.0598	-3.21445
119	-18.1624	-19.265	0	-18.1624	-19.265		40	-11.012	-2.77051	0	-11.012	-2.77051
120	-19.5468	-19.5075	0	-19.5468	-19.5075		41	-11.1706	-3.17508	0	-11.1706	-3.17508
121	-21.9057	-10.1751	0	-21.9057	-10.1751		42	-11.2426	-2.65475	0	-11.2426	-2.65475
122	-21.6602	-11.6819	0	-21.6602	-11.6819		43	-11.1865	-2.50018	0	-11.1865	-2.50018
123	-20.3314	-12.1689	0	-20.3314	-12.1689		44	-10.7319	-2.5303	0	-10.7319	-2.5303
124	-21.1357	-13.3331	0	-21.1357	-13.3331		45	-11.3689	-2.52817	0	-11.3689	-2.52817
125	-20.5757	-11.6144	0	-20.5757	-11.6144		46	-11.0668	-2.6987	0	-11.0668	-2.6987
126	-20.7969	-9.96936	0	-20.7969	-9.96936		47	-11.1202	-2.1088	0	-11.1202	-2.1088
127	-21.1199	-9.92142	0	-21.1199	-9.92142		48	-11.317	-2.4194	0	-11.317	-2.4194
128	-18.129	-11.6404	0	-18.129	-11.6404		49	-11.1389	-3.16684	0	-11.1389	-3.16684
129	-17.521	-13.2042	0	-17.521	-13.2042		50	-11.2358	-2.26575	0	-11.2358	-2.26575
130	-17.1531	-14.1375	0	-17.1531	-14.1375		51	-11.829	-2.92508	0	-11.829	-2.92508
1	0	0	0	0	0		52	-11.5392	-2.43335	0	-11.5392	-2.43335
2	1.24768	-0.780304	0	1.24768	-0.780304		53	-11.4979	-2.09052	0	-11.4979	-2.09052
3	0.621674	-2.18594	0	0.621674	-2.18594		54	-11.6062	-2.85928	0	-11.6062	-2.85928
4	1.24127	-3.25977	0	1.24127	-3.25977		55	-11.5463	-3.12607	0	-11.5463	-3.12607
5	2.34665	-3.42358	0	2.34665	-3.42358		56	-11.2042	-3.6214	0	-11.2042	-3.6214
6	2.33109	-3.79834	0	2.33109	-3.79834		57	-11.6973	-4.01221	0	-11.6973	-4.01221
7	3.1076	-4.39389	0	3.1076	-4.39389		58	-11.5408	-3.28174	0	-11.5408	-3.28174
8	2.90918	-4.48187	0	2.90918	-4.48187		59	-11.6012	-3.90125	0	-11.6012	-3.90125
9	2.18762	-5.13913	0	2.18762	-5.13913		60	-11.7367	-3.47952	0	-11.7367	-3.47952
10	3.53369	-4.07446	0	3.53369	-4.07446		61	-12.0677	-3.7569	0	-12.0677	-3.7569
11	3.63373	-6.06027	0	3.63373	-6.06027		62	-12.4482	-3.65778	0	-12.4482	-3.65778
12	5.39182	-6.05667	0	5.39182	-6.05667		63	-12.2155	-3.94629	0	-12.2155	-3.94629
13	5.31088	-6.79929	0	5.31088	-6.79929		64	-12.591	-3.75037	0	-12.591	-3.75037
14	4.63995	-6.86874	0	4.63995	-6.86874		65	-12.6397	-3.80634	0	-12.6397	-3.80634
15	6.60916	-8.12631	0	6.60916	-8.12631		66	-12.7842	-3.85098	0	-12.7842	-3.85098
16	6.52066	-8.26425	0	6.52066	-8.26425		67	-12.4735	-4.05405	0	-12.4735	-4.05405
17	7.0513	-7.83926	0	7.0513	-7.83926		68	-12.8592	-3.46906	0	-12.8592	-3.46906
18	7.89209	-8.42612	0	7.89209	-8.42612		69	-12.9464	-3.43216	0	-12.9464	-3.43216
19	8.52057	-8.96371	0	8.52057	-8.96371		70	-12.6542	-3.72241	0	-12.6542	-3.72241
20	8.67468	-9.57703	0	8.67468	-9.57703		71	-12.8456	-3.64035	0	-12.8456	-3.64035
21	8.88763	-10.5896	0	8.88763	-10.5896		72	-12.9818	-3.38876	0	-12.9818	-3.38876
22	8.88101	-10.2784	0	8.88101	-10.2784		73	-13.0305	-3.7348	0	-13.0305	-3.7348
23	8.79272	-10.7314	0	8.79272	-10.7314		74	-13.3148	-3.75998	0	-13.3148	-3.75998
24	8.39893	-10.6783	0	8.39893	-10.6783		75	-13.3433	-3.49796	0	-13.3433	-3.49796
25	8.01736	-10.5349	0	8.01736	-10.5349		76	-13.5168	-4.0722	0	-13.5168	-4.0722
26	7.21878	-11.7208	0	7.21878	-11.7208		77	-13.4823	-3.82776	0	-13.4823	-3.82776
27	7.79861	-10.9818	0	7.79861	-10.9818		78	-13.5138	-3.98685	0	-13.5138	-3.98685
28	6.99908	-11.6681	0	6.99908	-11.6681		79	-13.6871	-4.1752	0	-13.6871	-4.1752
29	6.91284	-11.5028	0	6.91284	-11.5028		80	-13.386	-3.58218	0	-13.386	-3.58218
30	7.07159	-12.1409	0	7.07159	-12.1409		81	-13.3931	-3.90985	0	-13.3931	-3.90985
31	7.9375	-11.5994	0	7.9375	-11.5994		82	-14.1918	-3.8136	0	-14.1918	-3.8136
32	7.82907	-12.3355	0	7.82907	-12.3355		83	-14.4413	-3.6171	0	-14.4413	-3.6171
33	7.0257	-12.3122	0	7.0257	-12.3122		84	-15.1063	-3.91647	0	-15.1063	-3.91647
34	7.06009	-11.2376	0	7.06009	-11.2376		85	-15.4528	-3.74399	0	-15.4528	-3.74399
35	7.48227	-11.67	0	7.48227	-11.67		86	-15.5481	-3.67416	0	-15.5481	-3.67416
36	7.17624	-12.1013	0	7.17624	-12.1013		87	-16.0201	-3.38708	0	-16.0201	-3.38708
37	7.32922	-11.9104	0	7.32922	-11.9104		88	-16.7653	-3.50583	0	-16.7653	-3.50583
38	7.34238	-11.2733	0	7.34238	-11.2733		89	-16.7234	-3.60437	0	-16.7234	-3.60437
39	7.09024	-10.2614	0	7.09024	-10.2614		90	-17.6423	-3.97253	0	-17.6423	-3.97253
40	6.11853	-9.70541	0	6.11853	-9.70541		91	-17.5021	-4.07819	0	-17.5021	-4.07819
41	6.2554	-9.23181	0	6.2554	-9.23181		92	-17.7854	-3.41565	0	-17.7854	-3.41565
42	6.40103	-9.0408	0	6.40103	-9.0408		93	-18.36	-3.50073	0	-18.36	-3.50073
43	6.25812	-7.92578	0	6.25812	-7.92578		94	-18.2721	-3.05075	0	-18.2721	-3.05075
44	5.59744	-7.74316	0	5.59744	-7.74316		95	-17.7705	-3.45673	0	-17.7705	-3.45673
45	5.29272	-7.47562	0	5.29272	-7.47562		96	-17.7286	-3.41309	0	-17.7286	-3.41309
46	2.0336	-7.31247	0	2.0336	-7.31247		97	-17.2479	-2.96942	0	-17.2479	-2.96942
47	2.31116	-6.95197	0	2.31116	-6.95197		98	-17.4536	-3.1507	0	-17.4536	-3.1507
48	7.15942	-7.39438	0	7.15942	-7.39438		99	-17.4161	-3.53006	0	-17.4161	-3.53006
49	2.15753	-7.25754	0	2.15753	-7.25754		100	-17.3405	-3.32513	0	-17.3405	-3.32513
50	8.31021	-8.35324	0	8.31021	-8.35324		101	-17.2644	-3.4093	0	-17.2644	-3.4093
51	5.43375	-8.62244	0	5.43375	-8.62244		102	-17.222	-3.73874	0	-17.222	-3.73874
52	6.05856	-9.00162	0	6.05856	-9.00162		103	-16.8743	-3.43143	0	-16.8743	-3.43143
53	0.875366	-6.5419	0	0.875366	-6.5419		104	-17.237	-3.509	0	-17.237	-3.509
54	1.2991	-6.98569	0	1.2991	-6.98569		105	-17.19	-3.52359	0	-17.19	-3.52359
55	5.55927	-7.31445	0	5.55927	-7.31445		106	-17.8323	-2.8985	0	-17.8323	-2.8985
56	5.61591	-7.32574	0	5.61591	-7.32574		107	-17.2104	-2.94879	0	-17.2104	-2.94879
57	6.53766	-7.87268	0	6.53766	-7.87268		108	-17.3567	-2.58752	0	-17.3567	-2.58752
58	5.39362	-5.59744	0	5.39362	-5.59744		109	-16.7218	-2.07297	0	-16.7218	-2.07297
59	5.26993	-6.64719	0	5.26993	-6.64719		110	-17.0603	-1.78677	0	-17.0603	-1.78677
60	5.14099	-6.53702	0	5.14099	-6.53702		111	-17.5112	-1.75168	0	-17.5112	-1.75168
61	5.64359	-7.45575	0	5.64359	-7.45575		112	-17.0695	-0.875671	0	-17.0695	-0.875671
62	1.21545	-7.68668	0	1.21545	-7.68668		113	-17.21	-0.32901	0	-17.21	-0.32901
63	2.34332	-8.32526	0	2.34332	-8.32526		114	-17.5758	-0.799469	0	-17.5758	-0.799469
64	8.08936	-8.2395	0	8.08936	-8.2395		115	-19.2347	-0.386932	0	-19.2347	-0.386932
65	5.92361	-7.74265	0	5.92361	-7.74265		116	-18.4083	-0.441681	0	-18.4083	-0.441681
66	5.64783	-6.06107	0	5.64783	-6.06107		117	-19.123	0.102753	0	-19.123	0.102753
67	6.1524	-8.16983	0	6.1524	-8.16983		118	-19.0256	0.620331	0	-19.0256	0.620331
68	6.15598	-6.8945	0	6.15598	-6.8945		119	-18.7749	0.74823	0	-18.7749	0.74823
69	7.09332	-6.21265	0	7.09332	-6.21265		120	-18.6669	0.780487	0	-18.6669	0.780487
70	6.98642	-7.84564	0	6.98642	-7.84564		121	-18.4848	0.850891	0	-18.4848	0.850891
71	6.88278	-6.57242	0	6.88278	-6.57242		122	-18.5184	1.04688	0	-18.5184	1.04688
72	6.93399	-6.47922	0	6.93399	-6.47922		123	-18.7477	1.63239	0	-18.7477	1.63239
73	9.05081	-7.66153	0	9.05081	-7.66153		124	-18.5741	1.52191	0	-18.5741	1.52191
74	12.2779	-7.91574	0	12.2779	-7.91574		125	-18.4885	1.30133	0	-18.4885	1.30133
75	9.44836	-5.68265	0	9.44836	-5.68265		126	-18.6895	1.02438	0	-18.6895	1.02438
76	12.7145	-6.6586	0	12.7145	-6.6586		127	-18.3275	0.685699	0	-18.3275	0.685699
77	12.6798	-6.42715	0	12.6798	-6.42715		128	-18.4951	0.479797	0	-18.4951	0.479797
78	8.34891	-4.8299	0	8.34891	-4.8299		129	-18.2723	0.567902	0	-18.2723	0.567902
79	8.00702	-5.78412	0	8.00702	-5.78412		130	-17.712	-0.109558	0	-17.712	-0.109558
80	7.98059	-7.16852	0	7.98059	-7.16852		131	-17.8883	-0.414001	0	-17.8883	-0.414001
81	7.63205	-2.91043	0	7.63205	-2.91043		132	-17.4386	-1.7688	0	-17.4386	-1.7688
82	9.53116	-4.90384	0	9.53116	-4.90384		133	-16.9622	-1.99207	0	-16.9622	-1.99207
83	8.80936	-4.00214	0	8.80936	-4.00214		134	-17.281	-2.00986	0	-17.281	-2.00986
84	8.99783	-5.11359	0	8.99783	-5.11359		135	-17.035	-3.19641	0	-17.035	-3.19641
85	10.2015	-4.83151	0	10.2015	-4.83151		136	-17.19	-3.38593	0	-17.19	-3.38593
86	9.98364	-4.18295	0	9.98364	-4.18295		137	-16.4811	-4.0885	0	-16.4811	-4.0885
87	10.2663	-4.37003	0	10.2663	-4.37003		138	-15.968	-4.39072	0	-15.968	-4.39072
88	10.3565	-4.53836	0	10.3565	-4.53836		1	0	0	0	0	0
89	10.1331	-3.91312	0	10.1331	-3.91312		2	0.233429	-0.167175	0	0.233429	-0.167175
90	8.41486	-6.2316	0	8.41486	-6.2316		3	0.273224	-0.298584	0	0.273224	-0.298584
91	9.76828	-5.87766	0	9.76828	-5.87766		4	-0.236725	-0.00262451	0	-0.236725	-0.00262451
92	9.74866	-6.84644	0	9.74866	-6.84644		5	0.109802	0.114929	0	0.109802	0.114929
93	8.45135	-6.1048	0	8.45135	-6.1048		6	-0.0176697	-0.457275	0	-0.0176697	-0.457275
94	9.85074	-6.70831	0	9.85074	-6.70831		7	0.220032	-0.371765	0	0.220032	-0.371765
95	9.0882	-6.65677	0	9.0882	-6.65677		8	0.417816	-0.769165	0	0.417816	-0.769165
96	9.1246	-6.66388	0	9.1246	-6.66388		9	0.773834	-0.790222	0	0.773834	-0.790222
97	8.07047	-6.6058	0	8.07047	-6.6058		10	1.24619	-0.641052	0	1.24619	-0.641052
98	9.40887	-5.40768	0	9.40887	-5.40768		11	0.420197	-0.714661	0	0.420197	-0.714661
99	8.20389	-8.18359	0	8.20389	-8.18359		12	0.220856	-0.614258	0	0.220856	-0.614258
100	8.90988	-6.32382	0	8.90988	-6.32382		13	1.24469	-0.174683	0	1.24469	-0.174683
101	8.33624	-6.49255	0	8.33624	-6.49255		14	1.83856	0.220581	0	1.83856	0.220581
102	8.05792	-5.98538	0	8.05792	-5.98538		15	1.13675	-0.348816	0	1.13675	-0.348816
103	8.35727	-6.07849	0	8.35727	-6.07849		16	0.303253	0.0065918	0	0.303253	0.0065918
104	8.18393	-6.40744	0	8.18393	-6.40744		17	1.54208	1.48578	0	1.54208	1.48578
105	7.77124	-7.44595	0	7.77124	-7.44595		18	0.358612	-0.595825	0	0.358612	-0.595825
106	9.49994	-7.85074	0	9.49994	-7.85074		19	0.293427	-0.261658	0	0.293427	-0.261658
107	1.9805	-8.81796	0	1.9805	-8.81796		20	-1.33826	-0.74115	0	-1.33826	-0.74115
108	8.23441	-8.34216	0	8.23441	-8.34216		21	0.876038	1.73438	0	0.876038	1.73438
109	7.38092	-8.38028	0	7.38092	-8.38028		22	-0.959045	-0.195679	0	-0.959045	-0.195679
110	8.19324	-6.98853	0	8.19324	-6.98853		23	-0.194092	0.505554	0	-0.194092	0.505554
111	5.63239	-6.02661	0	5.63239	-6.02661		25	-0.510742	-0.316772	0	-0.510742	-0.316772
112	5.84387	-1.73956	0	5.84387	-1.73956		27	-0.197449	-0.28949	0	-0.197449	-0.28949
113	2.44543	-6.3363	0	2.44543	-6.3363		28	-0.850128	-0.610229	0	-0.850128	-0.610229
114	-0.259491	-5.70105	0	-0.259491	-5.70105		29	-0.76535	-0.355042	0	-0.76535	-0.355042
115	2.92908	-5.10382	0	2.92908	-5.10382		30	-1.40442	-0.251709	0	-1.40442	-0.251709
116	2.3255	-4.76764	0	2.3255	-4.76764		31	-0.299225	0.602417	0	-0.299225	0.602417
117	6.55615	-9.47372	0	6.55615	-9.47372		32	-1.2338	0.00683594	0	-1.2338	0.00683594
118	4.75943	-1.11563	0	4.75943	-1.11563		33	-0.031311	1.31726	0	-0.031311	1.31726
119	5.2305	-3.25723	0	5.2305	-3.25723		34	-2.04294	0.394714	0	-2.04294	0.394714
120	6.15356	-8.07251	0	6.15356	-8.07251		35	-1.69174	-0.215881	0	-1.69174	-0.215881
121	-0.113159	-6.4935	0	-0.113159	-6.4935		36	-2.65848	0.666992	0	-2.65848	0.666992
122	1.13235	-8.91406	0	1.13235	-8.91406		37	-2.28769	0.461609	0	-2.28769	0.461609
123	-0.549988	-9.45456	0	-0.549988	-9.45456		38	-1.61865	0.161194	0	-1.61865	0.161194
124	1.34131	-5.5629	0	1.34131	-5.5629		39	-1.51465	1.19446	0	-1.51465	1.19446
125	4.07056	-0.811951	0	4.07056	-0.811951		40	-1.40268	1.76105	0	-1.40268	1.76105
126	4.28937	1.43671	0	4.28937	1.43671		41	-2.17761	1.4624	0	-2.17761	1.4624
127	0.197937	-1.91907	0	0.197937	-1.91907		42	-1.82553	1.00891	0	-1.82553	1.00891
128	-0.608093	-2.80948	0	-0.608093	-2.80948		43	-2.15356	2.24658	0	-2.15356	2.24658
129	-1.03851	-4.41879	0	-1.03851	-4.41879		44	-2.24698	1.37164	0	-2.24698	1.37164
130	-0.169067	-3.73611	0	-0.169067	-3.73611		45	-1.11255	1.46667	0	-1.11255	1.46667
131	-0.278259	-2.75299	0	-0.278259	-2.75299		46	-2.26849	1.77917	0	-2.26849	1.77917
132	-0.787231	-3.4068	0	-0.787231	-3.4068		47	-2.78708	2.74677	0	-2.78708	2.74677
133	-0.629456	-4.90381	0	-0.629456	-4.90381		48	-1.69366	1.26031	0	-1.69366	1.26031
134	0.36441	-4.93185	0	0.36441	-4.93185		49	-2.42346	1.71326	0	-2.42346	1.71326
135	0.936615	-1.10281	0	0.936615	-1.10281		50	-3.44473	1.54248	0	-3.44473	1.54248
136	-0.444214	-5.36014	0	-0.444214	-5.36014		51	-3.09933	2.89984	0	-3.09933	2.89984
1	0	0	0	0	0		52	-3.49768	1.22565	0	-3.49768	1.22565
2	0.231995	0.264404	0	0.231995	0.264404		53	-2.7616	2.73669	0	-2.7616	2.73669
3	0.350281	-0.244812	0	0.350281	-0.244812		54	-2.29715	1.85468	0	-2.29715	1.85468
4	0.463928	-0.339813	0	0.463928	-0.339813		55	-2.34882	2.11646	0	-2.34882	2.11646
5	0.124146	0.217926	0	0.124146	0.217926		56	-2.9426	2.64557	0	-2.9426	2.64557
6	0.552307	0.377777	0	0.552307	0.377777		57	-2.88196	4.29138	0	-2.88196	4.29138
7	1.20917	0.102264	0	1.20917	0.102264		58	-3.22195	3.93823	0	-3.22195	3.93823
8	1.15961	-0.444336	0	1.15961	-0.444336		59	-3.28583	4.89673	0	-3.28583	4.89673
9	1.5965	-0.538971	0	1.5965	-0.538971		60	-3.58514	5.18866	0	-3.58514	5.18866
10	2.19116	-1.19467	0	2.19116	-1.19467		61	-2.4248	5.23438	0	-2.4248	5.23438
11	1.6889	-1.24356	0	1.6889	-1.24356		62	-2.65851	5.92633	0	-2.65851	5.92633
12	1.54315	-0.842499	0	1.54315	-0.842499		63	-3.55374	6.98633	0	-3.55374	6.98633
13	0.937195	0.00827026	0	0.937195	0.00827026		64	-3.2868	7.94489	0	-3.2868	7.94489
14	1.79932	-0.403046	0	1.79932	-0.403046		65	-3.67758	7.78168	0	-3.67758	7.78168
15	2.45306	-0.635742	0	2.45306	-0.635742		66	-3.703	7.7652	0	-3.703	7.7652
16	2.8642	-0.392853	0	2.8642	-0.392853		67	-3.57367	9.28668	0	-3.57367	9.28668
17	2.53882	-1.27722	0	2.53882	-1.27722		68	-3.48715	9.70312	0	-3.48715	9.70312
18	2.70056	-1.58325	0	2.70056	-1.58325		69	-3.32068	9.65997	0	-3.32068	9.65997
19	2.88782	-2.01749	0	2.88782	-2.01749		70	-3.80896	10.4913	0	-3.80896	10.4913
20	2.96405	-2.33667	0	2.96405	-2.33667		71	-3.11481	10.7046	0	-3.11481	10.7046
21	3.8429	-2.59027	0	3.8429	-2.59027		72	-3.34747	11.0747	0	-3.34747	11.0747
22	3.59528	-3.11987	0	3.59528	-3.11987		73	-4.16623	12.352	0	-4.16623	12.352
23	4.0639	-3.82037	0	4.0639	-3.82037		74	-3.33572	11.3058	0	-3.33572	11.3058
24	3.68427	-3.436	0	3.68427	-3.436		75	-4.3002	12.0319	0	-4.3002	12.0319
25	3.4798	-3.43161	0	3.4798	-3.43161		76	-4.37601	12.7124	0	-4.37601	12.7124
26	3.29468	-3.9686	0	3.29468	-3.9686		77	-4.39648	12.4326	0	-4.39648	12.4326
27	2.81757	-4.10492	0	2.81757	-4.10492		78	-4.74097	12.6523	0	-4.74097	12.6523
28	3.13318	-3.9996	0	3.13318	-3.9996		79	-4.77655	13.1707	0	-4.77655	13.1707
29	2.87231	-4.27859	0	2.87231	-4.27859		80	-5.48904	13.303	0	-5.48904	13.303
30	2.94672	-4.6207	0	2.94672	-4.6207		81	-4.99686	14.2308	0	-4.99686	14.2308
31	3.08203	-4.00385	0	3.08203	-4.00385		82	-4.61978	15.0848	0	-4.61978	15.0848
32	3.38123	-4.44354	0	3.38123	-4.44354		83	-4.48688	15.7698	0	-4.48688	15.7698
33	3.65491	-4.58444	0	3.65491	-4.58444		84	-4.95563	17.0347	0	-4.95563	17.0347
34	3.74011	-4.79367	0	3.74011	-4.79367		85	-4.70236	16.4202	0	-4.70236	16.4202
35	3.5639	-4.99237	0	3.5639	-4.99237		86	-4.8508	17.954	0	-4.8508	17.954
36	3.38666	-5.12894	0	3.38666	-5.12894		87	-4.84848	18.4484	0	-4.84848	18.4484
37	2.33203	-4.53403	0	2.33203	-4.53403		88	-4.65469	17.9071	0	-4.65469	17.9071
38	3.00079	-5.16931	0	3.00079	-5.16931		89	-3.45425	18.9957	0	-3.45425	18.9957
39	2.12695	-5.35583	0	2.12695	-5.35583		90	-3.23947	18.7189	0	-3.23947	18.7189
40	0.945374	-5.05518	0	0.945374	-5.05518		91	-3.30307	20.1102	0	-3.30307	20.1102
41	1.32037	-5.60983	0	1.32037	-5.60983		92	-3.71246	19.277	0	-3.71246	19.277
42	1.4162	-5.53198	0	1.4162	-5.53198		93	-3.89627	20.1266	0	-3.89627	20.1266
43	1.50781	-5.46515	0	1.50781	-5.46515		94	-4.00647	19.4374	0	-4.00647	19.4374
44	1.45892	-5.87952	0	1.45892	-5.87952		95	-2.983	18.4053	0	-2.983	18.4053
45	1.37628	-5.84189	0	1.37628	-5.84189		96	-2.85977	20.3029	0	-2.85977	20.3029
46	1.32635	-6.20911	0	1.32635	-6.20911		97	-2.40619	19.0697	0	-2.40619	19.0697
47	0.932861	-6.21588	0	0.932861	-6.21588		98	-2.60388	20.3882	0	-2.60388	20.3882
48	1.34515	-6.28079	0	1.34515	-6.28079		99	-2.3605	17.7341	0	-2.3605	17.7341
49	0.428345	-6.13953	0	0.428345	-6.13953		100	-3.08762	18.2636	0	-3.08762	18.2636
50	0.160583	-6.27396	0	0.160583	-6.27396		101	-3.21933	18.3751	0	-3.21933	18.3751
51	0.608215	-7.08005	0	0.608215	-7.08005		102	-2.86942	19.5472	0	-2.86942	19.5472
52	0.383301	-7.96771	0	0.383301	-7.96771		103	-2.84811	18.898	0	-2.84811	18.898
53	0.745056	-7.23749	0	0.745056	-7.23749		104	-3.5296	18.7784	0	-3.5296	18.7784
54	1.24707	-7.69016	0	1.24707	-7.69016		105	-4.2258	19.2988	0	-4.2258	19.2988
55	1.58276	-7.36697	0	1.58276	-7.36697		106	-4.61377	18.8749	0	-4.61377	18.8749
56	1.08539	-8.17456	0	1.08539	-8.17456		107	-4.54926	19.2248	0	-4.54926	19.2248
57	0.711548	-7.64822	0	0.711548	-7.64822		108	-5.00235	19.0794	0	-5.00235	19.0794
58	0.293884	-7.78253	0	0.293884	-7.78253		109	-4.55701	18.8141	0	-4.55701	18.8141
59	0.117493	-8.5174	0	0.117493	-8.5174		110	-4.73816	18.945	0	-4.73816	18.945
60	0.484314	-8.5921	0	0.484314	-8.5921		111	-4.28751	18.6374	0	-4.28751	18.6374
61	0.334473	-8.18628	0	0.334473	-8.18628		112	-4.18558	17.5737	0	-4.18558	17.5737
62	0.592102	-8.043	0	0.592102	-8.043		113	-4.98203	18.5529	0	-4.98203	18.5529
63	0.475647	-8.52173	0	0.475647	-8.52173		114	-5.64307	17.9574	0	-5.64307	17.9574
64	-0.606323	-9.13235	0	-0.606323	-9.13235		115	-7.02432	17.6385	0	-7.02432	17.6385
65	-0.393372	-10.0407	0	-0.393372	-10.0407		116	-7.09335	17.2689	0	-7.09335	17.2689
66	-0.880554	-9.37689	0	-0.880554	-9.37689		117	-6.8551	16.5029	0	-6.8551	16.5029
67	-0.0894165	-11.1464	0	-0.0894165	-11.1464		118	-7.03229	16.4099	0	-7.03229	16.4099
68	-0.244934	-10.7004	0	-0.244934	-10.7004		119	-7.51086	14.5292	0	-7.51086	14.5292
69	-0.526672	-11.7195	0	-0.526672	-11.7195		120	-7.76672	15.4346	0	-7.76672	15.4346
70	-1.13025	-10.8587	0	-1.13025	-10.8587		121	-8.82956	15.0383	0	-8.82956	15.0383
71	-0.340942	-10.0967	0	-0.340942	-10.0967		123	-8.02588	14.8359	0	-8.02588	14.8359
72	-0.987793	-11.7556	0	-0.987793	-11.7556		124	-7.41315	15.2411	0	-7.41315	15.2411
73	0.0976562	-11.5871	0	0.0976562	-11.5871		125	-7.20074	14.4689	0	-7.20074	14.4689
74	-0.0404053	-11.7669	0	-0.0404053	-11.7669		127	-5.94348	14.4283	0	-5.94348	14.4283
75	0.00878906	-10.4337	0	0.00878906	-10.4337		128	-5.80603	14.4264	0	-5.80603	14.4264
76	-0.000305176	-11.2973	0	-0.000305176	-11.2973		129	-5.84	13.9445	0	-5.84	13.9445
77	-0.293579	-10.5894	0	-0.293579	-10.5894		130	-5.39417	13.8935	0	-5.39417	13.8935
78	0.561279	-11.4233	0	0.561279	-11.4233		131	-6.21967	14.2804	0	-6.21967	14.2804
79	0.190369	-11.7334	0	0.190369	-11.7334		132	-6.07217	13.2425	0	-6.07217	13.2425
80	0.835327	-12.397	0	0.835327	-12.397		134	-6.6019	12.3206	0	-6.6019	12.3206
81	0.8974	-10.7737	0	0.8974	-10.7737		135	-5.94421	12.221	0	-5.94421	12.221
82	1.06384	-11.0242	0	1.06384	-11.0242		136	-5.58282	10.8242	0	-5.58282	10.8242
83	1.0155	-10.3474	0	1.0155	-10.3474		138	-4.86871	10.6598	0	-4.86871	10.6598
84	1.05463	-9.98929	0	1.05463	-9.98929		1	0	0	0	0	0
85	1.07788	-10.0858	0	1.07788	-10.0858		2	-0.741486	0.262939	0	-0.741486	0.262939
86	1.08624	-10.4024	0	1.08624	-10.4024		3	0.340607	-0.936493	0	0.340607	-0.936493
87	0.753601	-9.85068	0	0.753601	-9.85068		4	0.197205	-1.75729	0	0.197205	-1.75729
88	1.23901	-9.26935	0	1.23901	-9.26935		5	0.337646	-1.62216	0	0.337646	-1.62216
89	0.888611	-8.51328	0	0.888611	-8.51328		6	-0.391907	-3.42065	0	-0.391907	-3.42065
90	1.59186	-9.91824	0	1.59186	-9.91824		9	-0.188171	-7.59753	0	-0.188171	-7.59753
91	1.3642	-8.76031	0	1.3642	-8.76031		17	6.34698	-15.4421	0	6.34698	-15.4421
92	1.71954	-9.66022	0	1.71954	-9.66022		20	5.74271	-15.3303	0	5.74271	-15.3303
93	1.09863	-8.9053	0	1.09863	-8.9053		24	5.83942	-15.0358	0	5.83942	-15.0358
94	1.06824	-8.47739	0	1.06824	-8.47739		25	5.93506	-13.7077	0	5.93506	-13.7077
95	1.16962	-8.76273	0	1.16962	-8.76273		27	6.36084	-13.427	0	6.36084	-13.427
96	1.13611	-8.04865	0	1.13611	-8.04865		28	4.86157	-14.274	0	4.86157	-14.274
97	1.06195	-7.9566	0	1.06195	-7.9566		31	6.61115	-14.8325	0	6.61115	-14.8325
98	1.29553	-9.28345	0	1.29553	-9.28345		32	6.7059	-14.5413	0	6.7059	-14.5413
99	0.850586	-7.97446	0	0.850586	-7.97446		33	5.94589	-14.2709	0	5.94589	-14.2709
100	1.2876	-8.21149	0	1.2876	-8.21149		34	4.84262	-15.2717	0	4.84262	-15.2717
101	1.33337	-8.64731	0	1.33337	-8.64731		38	6.48474	-14.6741	0	6.48474	-14.6741
102	1.15619	-8.22659	0	1.15619	-8.22659		40	6.28079	-14.8235	0	6.28079	-14.8235
103	0.83197	-7.11841	0	0.83197	-7.11841		41	5.50482	-14.4483	0	5.50482	-14.4483
104	0.914185	-8.01709	0	0.914185	-8.01709		43	5.52853	-13.4843	0	5.52853	-13.4843
105	0.613037	-6.83691	0	0.613037	-6.83691		44	5.27969	-13.0619	0	5.27969	-13.0619
106	1.46301	-7.78259	0	1.46301	-7.78259		45	6.15952	-12.9176	0	6.15952	-12.9176
107	1.81506	-7.65967	0	1.81506	-7.65967		46	5.96481	-13.0985	0	5.96481	-13.0985
108	1.73419	-7.69614	0	1.73419	-7.69614		47	5.97369	-13.2665	0	5.97369	-13.2665
109	2.25122	-8.19391	0	2.25122	-8.19391		48	4.89429	-13.8488	0	4.89429	-13.8488
110	2.31512	-7.93857	0	2.31512	-7.93857		49	5.05917	-13.3354	0	5.05917	-13.3354
111	1.61633	-6.80042	0	1.61633	-6.80042		50	5.06961	-12.7043	0	5.06961	-12.7043
112	2.54016	-8.21573	0	2.54016	-8.21573		51	5.55545	-13.1162	0	5.55545	-13.1162
113	2.08698	-7.7363	0	2.08698	-7.7363		52	4.74783	-12.1373	0	4.74783	-12.1373
114	2.54163	-8.03644	0	2.54163	-8.03644		53	5.31372	-12.2896	0	5.31372	-12.2896
115	2.2417	-7.50092	0	2.2417	-7.50092		54	5.44138	-12.7733	0	5.44138	-12.7733
116	1.83453	-7.42053	0	1.83453	-7.42053		55	6.37375	-11.3464	0	6.37375	-11.3464
117	2.24823	-8.5517	0	2.24823	-8.5517		56	6.09958	-11.943	0	6.09958	-11.943
118	2.37195	-7.83298	0	2.37195	-7.83298		57	6.28342	-11.0389	0	6.28342	-11.0389
119	2.44794	-8.04123	0	2.44794	-8.04123		58	6.27817	-10.964	0	6.27817	-10.964
120	2.5755	-7.99405	0	2.5755	-7.99405		59	6.86273	-10.648	0	6.86273	-10.648
121	2.65387	-8.52203	0	2.65387	-8.52203		60	6.85733	-9.85233	0	6.85733	-9.85233
122	2.73639	-8.52512	0	2.73639	-8.52512		61	6.01425	-10.4447	0	6.01425	-10.4447
123	2.0191	-7.66843	0	2.0191	-7.66843		62	6.20044	-9.6626	0	6.20044	-9.6626
124	2.88556	-7.79221	0	2.88556	-7.79221		63	6.50708	-10.3196	0	6.50708	-10.3196
125	3.16833	-8.62653	0	3.16833	-8.62653		64	6.19086	-10.2322	0	6.19086	-10.2322
126	2.85535	-8.34726	0	2.85535	-8.34726		65	5.79831	-10.3022	0	5.79831	-10.3022
127	2.86371	-7.91415	0	2.86371	-7.91415		66	4.84546	-11.1954	0	4.84546	-11.1954
128	3.78296	-8.64319	0	3.78296	-8.64319		67	3.25439	-12.3903	0	3.25439	-12.3903
129	2.62231	-7.6142	0	2.62231	-7.6142		68	1.90851	-14.4638	0	1.90851	-14.4638
130	3.08893	-8.7164	0	3.08893	-8.7164		69	1.87848	-14.4879	0	1.87848	-14.4879
131	3.48145	-8.75003	0	3.48145	-8.75003		70	1.85846	-14.6108	0	1.85846	-14.6108
132	3.3739	-8.78491	0	3.3739	-8.78491		71	4.39313	-12.7331	0	4.39313	-12.7331
133	3.69897	-10.0226	0	3.69897	-10.0226		72	1.56143	-15.4571	0	1.56143	-15.4571
134	3.45447	-8.81171	0	3.45447	-8.81171		73	3.7103	-13.3147	0	3.7103	-13.3147
135	3.64697	-9.22775	0	3.64697	-9.22775		74	0.742462	-15.255	0	0.742462	-15.255
136	3.47699	-8.6701	0	3.47699	-8.6701		75	4.05276	-13.0272	0	4.05276	-13.0272
1	0	0	0	0	0		76	2.12115	-14.7799	0	2.12115	-14.7799
2	0.0407104	-0.403961	0	0.0407104	-0.403961		77	1.94864	-14.9767	0	1.94864	-14.9767
5	-0.532227	-0.456284	0	-0.532227	-0.456284		78	3.90265	-13.3672	0	3.90265	-13.3672
6	-0.0713501	-1.3857	0	-0.0713501	-1.3857		79	4.07327	-12.9231	0	4.07327	-12.9231
7	-0.479614	-2.27014	0	-0.479614	-2.27014		80	4.89462	-12.6298	0	4.89462	-12.6298
8	-0.402649	-1.5311	0	-0.402649	-1.5311		81	4.20496	-12.9893	0	4.20496	-12.9893
9	6.28656	-10.1505	0	6.28656	-10.1505		82	5.08887	-13.9535	0	5.08887	-13.9535
10	6.48267	-12.3204	0	6.48267	-12.3204		83	5.45227	-13.7489	0	5.45227	-13.7489
11	-0.507812	-2.09216	0	-0.507812	-2.09216		84	4.72189	-13.5669	0	4.72189	-13.5669
12	6.66602	-13.4939	0	6.66602	-13.4939		85	4.76572	-13.616	0	4.76572	-13.616
13	6.00928	-13.0366	0	6.00928	-13.0366		86	4.43985	-13.622	0	4.43985	-13.622
14	6.32019	-13.7184	0	6.32019	-13.7184		87	4.57886	-13.9177	0	4.57886	-13.9177
15	6.01227	-12.5883	0	6.01227	-12.5883		88	0.00265503	-17.8769	0	0.00265503	-17.8769
16	4.69812	-8.67163	0	4.69812	-8.67163		89	0.939941	-17.2427	0	0.939941	-17.2427
17	5.77863	-12.2992	0	5.77863	-12.2992		90	1.91864	-16.7528	0	1.91864	-16.7528
18	3.74933	-2.13734	0	3.74933	-2.13734		91	2.53128	-16.4337	0	2.53128	-16.4337
19	5.13586	-5.84523	0	5.13586	-5.84523		92	2.11441	-17.4771	0	2.11441	-17.4771
20	5.20868	-9.53493	0	5.20868	-9.53493		93	2.0556	-17.091	0	2.0556	-17.091
21	5.79529	-12.1624	0	5.79529	-12.1624		94	3.18033	-16.1792	0	3.18033	-16.1792
22	5.75629	-12.1314	0	5.75629	-12.1314		95	2.13211	-15.4142	0	2.13211	-15.4142
23	5.88892	-12.2832	0	5.88892	-12.2832		96	1.79089	-16.5624	0	1.79089	-16.5624
24	5.67572	-7.38979	0	5.67572	-7.38979		97	3.35034	-16.8214	0	3.35034	-16.8214
25	5.82526	-7.32822	0	5.82526	-7.32822		98	3.58173	-16.3318	0	3.58173	-16.3318
26	6.33997	-7.45174	0	6.33997	-7.45174		99	2.77951	-16.5358	0	2.77951	-16.5358
27	6.51941	-13.8417	0	6.51941	-13.8417		100	3.03891	-18.9761	0	3.03891	-18.9761
29	3.95038	-4.44806	0	3.95038	-4.44806		101	1.84546	-17.3941	0	1.84546	-17.3941
30	7.19916	-6.31639	0	7.19916	-6.31639		102	3.82053	-18.5941	0	3.82053	-18.5941
31	7.5896	-8.21446	0	7.5896	-8.21446		103	3.4332	-16.6162	0	3.4332	-16.6162
32	4.67755	-3.83589	0	4.67755	-3.83589		104	2.3945	-16.2345	0	2.3945	-16.2345
35	5.65979	-2.89722	0	5.65979	-2.89722		105	2.95883	-12.4935	0	2.95883	-12.4935
40	8.17151	-9.5923	0	8.17151	-9.5923		106	0.783508	-10.384	0	0.783508	-10.384
47	8.77496	-13.6522	0	8.77496	-13.6522		107	-0.613647	-9.94183	0	-0.613647	-9.94183
48	8.96082	-13.3559	0	8.96082	-13.3559		108	2.96048	-11.5651	0	2.96048	-11.5651
49	9.08057	-13.6276	0	9.08057	-13.6276		109	6.50885	-13.4799	0	6.50885	-13.4799
51	9.09222	-25.532	0	9.09222	-25.532		110	6.32629	-11.8908	0	6.32629	-11.8908
52	9.52386	-25.6671	0	9.52386	-25.6671		111	7.87158	-10.4824	0	7.87158	-10.4824
53	9.34937	-26.4733	0	9.34937	-26.4733		112	9.49478	-10.2903	0	9.49478	-10.2903
55	9.45563	-18.4084	0	9.45563	-18.4084		113	8.24237	-9.73157	0	8.24237	-9.73157
56	9.76416	-19.5383	0	9.76416	-19.5383		114	6.75558	-10.4014	0	6.75558	-10.4014
57	11.5314	-31.1269	0	11.5314	-31.1269		115	7.37875	-10.2674	0	7.37875	-10.2674
60	10.3142	-23.6436	0	10.3142	-23.6436		117	7.69232	-9.94183	0	7.69232	-9.94183
61	10.3782	-24.8183	0	10.3782	-24.8183		118	7.34933	-9.61838	0	7.34933	-9.61838
62	10.8072	-26.2864	0	10.8072	-26.2864		120	8.86761	-7.68811	0	8.86761	-7.68811
63	10.0368	-26.3328	0	10.0368	-26.3328		124	3.05881	-3.56613	0	3.05881	-3.56613
64	10.8777	-34.923	0	10.8777	-34.923		132	0.643707	-4.62119	0	0.643707	-4.62119
65	10.5475	-35.0031	0	10.5475	-35.0031		133	0.380463	-4.53165	0	0.380463	-4.53165
66	9.59454	-27.0279	0	9.59454	-27.0279		135	-1.77081	-2.80518	0	-1.77081	-2.80518
67	12.1141	-36.4357	0	12.1141	-36.4357		137	-2.03088	-2.17032	0	-2.03088	-2.17032
68	12.3663	-37.4301	0	12.3663	-37.4301		1	0	0	0	0	0
69	12.0571	-35.7242	0	12.0571	-35.7242		2	-0.120911	0.606323	0	-0.120911	0.606323
70	11.6569	-31.1033	0	11.6569	-31.1033		3	0.341614	0.0439453	0	0.341614	0.0439453
71	13.5074	-37.7891	0	13.5074	-37.7891		4	-0.160706	0.290405	0	-0.160706	0.290405
72	12.2087	-31.5037	0	12.2087	-31.5037		5	0.482056	-0.161743	0	0.482056	-0.161743
73	12.6163	-32.7922	0	12.6163	-32.7922		6	0.678894	-0.159698	0	0.678894	-0.159698
74	12.6597	-34.24	0	12.6597	-34.24		7	0.517578	-0.103058	0	0.517578	-0.103058
75	13.2092	-33.4765	0	13.2092	-33.4765		8	1.10101	-0.265533	0	1.10101	-0.265533
76	13.2902	-35.6577	0	13.2902	-35.6577		9	1.54382	0.123688	0	1.54382	0.123688
77	13.3314	-35.4234	0	13.3314	-35.4234		10	1.40247	-0.250977	0	1.40247	-0.250977
78	13.3764	-35.1461	0	13.3764	-35.1461		11	1.35089	0.628479	0	1.35089	0.628479
79	13.257	-37.8687	0	13.257	-37.8687		14	-3.53998	0.146667	0	-3.53998	0.146667
80	13.6793	-38.3057	0	13.6793	-38.3057		16	-7.69098	-0.750183	0	-7.69098	-0.750183
81	14.3846	-39.6571	0	14.3846	-39.6571		17	5.12476	-5.34451	0	5.12476	-5.34451
82	13.8211	-39.4998	0	13.8211	-39.4998		18	2.06384	-5.76331	0	2.06384	-5.76331
83	14.2628	-40.1394	0	14.2628	-40.1394		19	-2.026	0.957794	0	-2.026	0.957794
84	13.8908	-39.9441	0	13.8908	-39.9441		20	-8.05383	-2.35214	0	-8.05383	-2.35214
85	14.1469	-38.6693	0	14.1469	-38.6693		21	-7.01874	-1.51035	0	-7.01874	-1.51035
86	14.476	-39.716	0	14.476	-39.716		22	-8.37915	-1.98831	0	-8.37915	-1.98831
87	14.696	-39.1912	0	14.696	-39.1912		23	-8.52338	-1.92722	0	-8.52338	-1.92722
88	13.8514	-38.8158	0	13.8514	-38.8158		24	-9.70728	-1.60455	0	-9.70728	-1.60455
89	13.8743	-36.9443	0	13.8743	-36.9443		25	-9.47253	-0.729462	0	-9.47253	-0.729462
90	12.923	-38.349	0	12.923	-38.349		26	-9.79309	-0.493958	0	-9.79309	-0.493958
91	13.594	-37.3281	0	13.594	-37.3281		27	-8.89435	0.17981	0	-8.89435	0.17981
92	14.1167	-38.55	0	14.1167	-38.55		28	-8.48126	-0.102692	0	-8.48126	-0.102692
93	14.0132	-36.4748	0	14.0132	-36.4748		29	-8.88983	-0.399872	0	-8.88983	-0.399872
94	12.2456	-35.6546	0	12.2456	-35.6546		30	-9.13861	-0.629761	0	-9.13861	-0.629761
95	14.5661	-38.4901	0	14.5661	-38.4901		31	-9.60229	-1.13513	0	-9.60229	-1.13513
96	14.8813	-37.8406	0	14.8813	-37.8406		32	-9.13977	-1.28818	0	-9.13977	-1.28818
97	15.5508	-35.9573	0	15.5508	-35.9573		33	-9.46863	-1.12204	0	-9.46863	-1.12204
98	15.2478	-36.0384	0	15.2478	-36.0384		34	-9.32654	-0.792694	0	-9.32654	-0.792694
99	14.7662	-35.9534	0	14.7662	-35.9534		35	-9.00403	-1.81549	0	-9.00403	-1.81549
100	15.2028	-38.5989	0	15.2028	-38.5989		36	-8.27405	-0.884674	0	-8.27405	-0.884674
101	13.8065	-38.9671	0	13.8065	-38.9671		37	-8.1792	-1.2305	0	-8.1792	-1.2305
102	13.3779	-38.2507	0	13.3779	-38.2507		39	-3.7995	-1.61002	0	-3.7995	-1.61002
103	13.8965	-36.8611	0	13.8965	-36.8611		40	-9.38501	-0.156952	0	-9.38501	-0.156952
104	13.4065	-36.6685	0	13.4065	-36.6685		41	-9.76056	-0.345276	0	-9.76056	-0.345276
105	14.6589	-37.908	0	14.6589	-37.908		42	-8.88055	-0.200409	0	-8.88055	-0.200409
106	14.0302	-37.0583	0	14.0302	-37.0583		43	-8.6861	-0.294067	0	-8.6861	-0.294067
107	15.0128	-35.7167	0	15.0128	-35.7167		44	-8.46588	0.194092	0	-8.46588	0.194092
108	15.9991	-36.7522	0	15.9991	-36.7522		45	-8.31689	0.385925	0	-8.31689	0.385925
109	15.4697	-33.1068	0	15.4697	-33.1068		46	-9.10718	2.6651	0	-9.10718	2.6651
110	16.7631	-34.4806	0	16.7631	-34.4806		47	-8.72913	0.836243	0	-8.72913	0.836243
111	12.5205	-34.8291	0	12.5205	-34.8291		48	-8.45941	0.565674	0	-8.45941	0.565674
112	11.8714	-31.3841	0	11.8714	-31.3841		49	-8.38684	-0.285004	0	-8.38684	-0.285004
113	11.7156	-31.445	0	11.7156	-31.445		52	-8.14612	1.62466	0	-8.14612	1.62466
114	11.8044	-33.5122	0	11.8044	-33.5122		53	-7.90704	1.96219	0	-7.90704	1.96219
115	12.1723	-33.3788	0	12.1723	-33.3788		54	-9.41278	3.08548	0	-9.41278	3.08548
116	12.6829	-36.2853	0	12.6829	-36.2853		55	-8.81232	2.39175	0	-8.81232	2.39175
117	14.9783	-29.5411	0	14.9783	-29.5411		56	-8.80298	3.38593	0	-8.80298	3.38593
118	15.6096	-33.28	0	15.6096	-33.28		57	3.08588	1.5589	0	3.08588	1.5589
119	15.5169	-32.3766	0	15.5169	-32.3766		58	-9.12384	3.56567	0	-9.12384	3.56567
120	14.278	-29.9661	0	14.278	-29.9661		60	-8.06732	4.38742	0	-8.06732	4.38742
121	14.0245	-29.6447	0	14.0245	-29.6447		61	-10.7056	5.17743	0	-10.7056	5.17743
122	13.6566	-28.8217	0	13.6566	-28.8217		62	-10.9477	5.45612	0	-10.9477	5.45612
123	15.0907	-32.812	0	15.0907	-32.812		63	-10.1797	4.45334	0	-10.1797	4.45334
124	15.0892	-32.5987	0	15.0892	-32.5987		64	-10.2058	5.1333	0	-10.2058	5.1333
125	14.7025	-30.8647	0	14.7025	-30.8647		65	-9.3797	5.08701	0	-9.3797	5.08701
126	14.205	-29.9597	0	14.205	-29.9597		66	-8.92963	4.64651	0	-8.92963	4.64651
127	14.7364	-33.6941	0	14.7364	-33.6941		67	-9.58459	4.63412	0	-9.58459	4.63412
128	15.3114	-32.3101	0	15.3114	-32.3101		68	-10.6763	5.59003	0	-10.6763	5.59003
129	15.6865	-33.5731	0	15.6865	-33.5731		69	-10.6993	6.01974	0	-10.6993	6.01974
130	16.1511	-33.6839	0	16.1511	-33.6839		70	-10.4359	6.59625	0	-10.4359	6.59625
131	16.1219	-35.1625	0	16.1219	-35.1625		72	-12.2321	6.83255	0	-12.2321	6.83255
132	16.7922	-35.8202	0	16.7922	-35.8202		73	-11.7993	6.28384	0	-11.7993	6.28384
133	16.0632	-35.3157	0	16.0632	-35.3157		74	-13.2724	6.17731	0	-13.2724	6.17731
134	15.7482	-34.129	0	15.7482	-34.129		75	-11.1215	6.80206	0	-11.1215	6.80206
135	14.8171	-31.165	0	14.8171	-31.165		76	-10.1722	7.7002	0	-10.1722	7.7002
136	15.3091	-32.5435	0	15.3091	-32.5435		77	-11.0778	8.20886	0	-11.0778	8.20886
1	0	0	0	0	0		78	-10.7629	7.49371	0	-10.7629	7.49371
2	1.21835	-1.50629	0	1.21835	-1.50629		79	-9.24988	6.90439	0	-9.24988	6.90439
3	0.383484	-0.433075	0	0.383484	-0.433075		81	-12.44	9.4516	0	-12.44	9.4516
4	0.466705	0.411591	0	0.466705	0.411591		84	-11.6664	9.53287	0	-11.6664	9.53287
5	0.745697	0.194977	0	0.745697	0.194977		85	-10.566	8.2963	0	-10.566	8.2963
6	0.392303	0.908325	0	0.392303	0.908325		86	-11.9141	9.33722	0	-11.9141	9.33722
7	0.614777	0.26413	0	0.614777	0.26413		87	-11.4139	7.70984	0	-11.4139	7.70984
8	0.630188	0.57901	0	0.630188	0.57901		88	-12.3895	7.32962	0	-12.3895	7.32962
9	-0.183838	2.10355	0	-0.183838	2.10355		89	-12.5714	6.40115	0	-12.5714	6.40115
10	0.684326	1.46509	0	0.684326	1.46509		90	-11.3665	7.00241	0	-11.3665	7.00241
11	0.530457	0.466278	0	0.530457	0.466278		91	-11.5337	8.62595	0	-11.5337	8.62595
12	0.468994	1.51437	0	0.468994	1.51437		92	-11.0357	9.93298	0	-11.0357	9.93298
13	0.424622	1.79691	0	0.424622	1.79691		93	-11.8559	9.31543	0	-11.8559	9.31543
14	0.981384	1.80948	0	0.981384	1.80948		94	-11.5828	10.0252	0	-11.5828	10.0252
15	0.941101	0.900421	0	0.941101	0.900421		95	-11.1436	10.2265	0	-11.1436	10.2265
16	0.388428	1.67709	0	0.388428	1.67709		96	-10.1649	9.81329	0	-10.1649	9.81329
17	0.843964	1.24188	0	0.843964	1.24188		97	-10.201	10.254	0	-10.201	10.254
18	1.09366	1.23526	0	1.09366	1.23526		99	-9.07593	14.6833	0	-9.07593	14.6833
19	0.552246	1.79672	0	0.552246	1.79672		100	-10.9246	10.7378	0	-10.9246	10.7378
20	0.356964	1.66837	0	0.356964	1.66837		101	-12.4372	10.9689	0	-12.4372	10.9689
21	1.07516	0.629059	0	1.07516	0.629059		102	-12.9595	11.9143	0	-12.9595	11.9143
22	1.15628	-0.42981	0	1.15628	-0.42981		103	-12.5212	10.9774	0	-12.5212	10.9774
23	0.286499	0.800079	0	0.286499	0.800079		104	-11.8845	10.1257	0	-11.8845	10.1257
24	0.819672	-0.0324097	0	0.819672	-0.0324097		105	-13.0671	10.6986	0	-13.0671	10.6986
25	0.626007	-0.287018	0	0.626007	-0.287018		106	-9.45703	11.9591	0	-9.45703	11.9591
26	0.883575	-0.927216	0	0.883575	-0.927216		107	-13.5244	10.4194	0	-13.5244	10.4194
27	1.75302	-1.92191	0	1.75302	-1.92191		109	-16.527	12.1841	0	-16.527	12.1841
28	1.62723	-1.26614	0	1.62723	-1.26614		110	-5.05457	7.08383	0	-5.05457	7.08383
29	2.20465	-0.880066	0	2.20465	-0.880066		111	-13.5981	9.26144	0	-13.5981	9.26144
30	1.95972	0.0952759	0	1.95972	0.0952759		113	-14.1849	8.35425	0	-14.1849	8.35425
31	2.12674	-0.64209	0	2.12674	-0.64209		114	-16.5975	8.89685	0	-16.5975	8.89685
32	1.98462	-1.49567	0	1.98462	-1.49567		124	-21.4982	3.61057	0	-21.4982	3.61057
33	2.46759	-1.93686	0	2.46759	-1.93686		125	-22.5419	3.8912	0	-22.5419	3.8912
34	2.31931	-1.42844	0	2.31931	-1.42844		126	-23.2042	4.09805	0	-23.2042	4.09805
35	1.50238	-0.972992	0	1.50238	-0.972992		128	-23.0052	5.87366	0	-23.0052	5.87366
36	2.19919	-1.28342	0	2.19919	-1.28342		130	-23.0854	8.44934	0	-23.0854	8.44934
37	2.14716	-1.46661	0	2.14716	-1.46661		136	-27.006	9.7114	0	-27.006	9.7114
38	2.06372	-1.4343	0	2.06372	-1.4343		137	-26.1918	7.99496	0	-26.1918	7.99496
39	1.75015	-1.40991	0	1.75015	-1.40991		1	0	0	0	0	0
40	0.785828	-0.755615	0	0.785828	-0.755615		4	-0.493958	-0.0189819	0	-0.493958	-0.0189819
41	0.892303	-0.865967	0	0.892303	-0.865967		6	-0.127777	0.470337	0	-0.127777	0.470337
42	0.872955	-0.996552	0	0.872955	-0.996552		7	-0.41568	0.454773	0	-0.41568	0.454773
43	1.72745	-1.40277	0	1.72745	-1.40277		8	-1.19122	-0.11969	0	-1.19122	-0.11969
44	1.17172	-1.31293	0	1.17172	-1.31293		9	-1.26749	-0.16803	0	-1.26749	-0.16803
45	1.46228	-1.6546	0	1.46228	-1.6546		10	-1.43765	-0.308777	0	-1.43765	-0.308777
46	1.72168	-3.0741	0	1.72168	-3.0741		11	-1.67639	-0.417725	0	-1.67639	-0.417725
47	1.61124	-3.61819	0	1.61124	-3.61819		12	-2.9942	-0.372681	0	-2.9942	-0.372681
48	2.14523	-3.94446	0	2.14523	-3.94446		13	-3.63104	-0.250854	0	-3.63104	-0.250854
49	0.912415	-3.75168	0	0.912415	-3.75168		14	-4.20245	0.255493	0	-4.20245	0.255493
50	1.50238	-4.28085	0	1.50238	-4.28085		15	-4.48532	-0.134949	0	-4.48532	-0.134949
51	1.48032	-4.89172	0	1.48032	-4.89172		16	-2.72534	-1.98004	0	-2.72534	-1.98004
52	1.00778	-4.36475	0	1.00778	-4.36475		17	-6.96634	-1.09064	0	-6.96634	-1.09064
53	1.59625	-5.02621	0	1.59625	-5.02621		18	-8.19299	-2.02911	0	-8.19299	-2.02911
54	0.325806	-4.52493	0	0.325806	-4.52493		19	-8.69284	-1.70782	0	-8.69284	-1.70782
55	0.98819	-5.46304	0	0.98819	-5.46304		20	-9.89264	-1.97473	0	-9.89264	-1.97473
56	0.821594	-6.49405	0	0.821594	-6.49405		21	-9.60281	-2.19794	0	-9.60281	-2.19794
57	0.205658	-6.63443	0	0.205658	-6.63443		22	-9.96548	-3.32483	0	-9.96548	-3.32483
58	-0.0757446	-7.0072	0	-0.0757446	-7.0072		23	-11.357	-2.87714	0	-11.357	-2.87714
59	0.56546	-6.57809	0	0.56546	-6.57809		24	-10.6915	-2.51904	0	-10.6915	-2.51904
60	1.51495	-6.44681	0	1.51495	-6.44681		25	-11.033	-3.06287	0	-11.033	-3.06287
61	0.829681	-6.03455	0	0.829681	-6.03455		26	-10.5517	0.382996	0	-10.5517	0.382996
62	1.21173	-6.5047	0	1.21173	-6.5047		27	-10.5383	0.50708	0	-10.5383	0.50708
63	0.484772	-6.04883	0	0.484772	-6.04883		28	-10.4938	0.632019	0	-10.4938	0.632019
64	0.0420532	-6.86417	0	0.0420532	-6.86417		29	-10.4861	-0.649597	0	-10.4861	-0.649597
65	0.357056	-6.74692	0	0.357056	-6.74692		30	-10.3276	0.426331	0	-10.3276	0.426331
66	0.0574341	-6.49918	0	0.0574341	-6.49918		31	-11.2256	-0.245178	0	-11.2256	-0.245178
67	-0.107605	-6.48285	0	-0.107605	-6.48285		32	-10.5307	-0.322449	0	-10.5307	-0.322449
68	1.34375	-6.99142	0	1.34375	-6.99142		33	-11.2995	0.911682	0	-11.2995	0.911682
69	1.46368	-7.36417	0	1.46368	-7.36417		34	-11.8772	0.808411	0	-11.8772	0.808411
70	0.800507	-7.79742	0	0.800507	-7.79742		35	-12.4314	0.346497	0	-12.4314	0.346497
71	1.48181	-7.55862	0	1.48181	-7.55862		36	-10.9604	-0.331177	0	-10.9604	-0.331177
72	4.23782	-7.93188	0	4.23782	-7.93188		37	-12.3673	0.24353	0	-12.3673	0.24353
73	1.47556	-7.81033	0	1.47556	-7.81033		38	-12.1425	-0.0592041	0	-12.1425	-0.0592041
74	2.3786	-7.58203	0	2.3786	-7.58203		39	-12.4014	-0.358032	0	-12.4014	-0.358032
75	3.90726	-7.6525	0	3.90726	-7.6525		40	-7.16592	-1.52374	0	-7.16592	-1.52374
76	3.12762	-7.42645	0	3.12762	-7.42645		41	-13.0518	-0.0412598	0	-13.0518	-0.0412598
77	2.54861	-7.15408	0	2.54861	-7.15408		42	-13.4899	0.059082	0	-13.4899	0.059082
78	3.1954	-7.61612	0	3.1954	-7.61612		43	-13.0188	-0.248596	0	-13.0188	-0.248596
79	3.60724	-7.86823	0	3.60724	-7.86823		44	-13.9297	-0.696594	0	-13.9297	-0.696594
80	4.25244	-8.05283	0	4.25244	-8.05283		45	-13.5507	-0.302795	0	-13.5507	-0.302795
81	5.02469	-8.26382	0	5.02469	-8.26382		46	-14.2509	-0.573547	0	-14.2509	-0.573547
82	3.89444	-8.14203	0	3.89444	-8.14203		47	-14.1708	-1.93518	0	-14.1708	-1.93518
83	5.32523	-9.01962	0	5.32523	-9.01962		48	-14.1849	-0.369812	0	-14.1849	-0.369812
84	5.03833	-8.94254	0	5.03833	-8.94254		49	-14.5033	-2.2373	0	-14.5033	-2.2373
85	8.75385	-9.68332	0	8.75385	-9.68332		50	-14.6293	-2.41937	0	-14.6293	-2.41937
86	5.13766	-8.6521	0	5.13766	-8.6521		51	-14.4695	-1.245	0	-14.4695	-1.245
87	4.59113	-8.85056	0	4.59113	-8.85056		52	-15.1225	-3.22211	0	-15.1225	-3.22211
88	10.0584	-10.096	0	10.0584	-10.096		53	-15.6306	-0.967651	0	-15.6306	-0.967651
89	4.86395	-8.58173	0	4.86395	-8.58173		54	-16.9018	-1.42017	0	-16.9018	-1.42017
90	9.67706	-10.1808	0	9.67706	-10.1808		55	-17.4532	-2.47119	0	-17.4532	-2.47119
91	5.03369	-8.51288	0	5.03369	-8.51288		56	-16.35	-2.51886	0	-16.35	-2.51886
92	10.2517	-9.97037	0	10.2517	-9.97037		57	-15.5849	-2.53674	0	-15.5849	-2.53674
93	9.26889	-9.89618	0	9.26889	-9.89618		58	-17.0391	-3.24731	0	-17.0391	-3.24731
94	11.922	-10.9001	0	11.922	-10.9001		59	-16.032	-2.77686	0	-16.032	-2.77686
95	10.2654	-10.3169	0	10.2654	-10.3169		60	-16.6039	-3.88336	0	-16.6039	-3.88336
96	7.64294	-8.67758	0	7.64294	-8.67758		61	-16.2968	-5.84204	0	-16.2968	-5.84204
97	7.87711	-8.87836	0	7.87711	-8.87836		62	-18.1329	-12.9214	0	-18.1329	-12.9214
98	8.065	-8.97418	0	8.065	-8.97418		63	-17.2242	-5.66779	0	-17.2242	-5.66779
99	7.80643	-8.46292	0	7.80643	-8.46292		64	-17.7093	-6.64148	0	-17.7093	-6.64148
100	7.11075	-8.40283	0	7.11075	-8.40283		65	-18.46	-13.3777	0	-18.46	-13.3777
101	11.087	-10.1107	0	11.087	-10.1107		66	-17.7417	-5.37744	0	-17.7417	-5.37744
102	8.55341	-8.92691	0	8.55341	-8.92691		67	-18.8504	-13.9505	0	-18.8504	-13.9505
103	9.85507	-9.11801	0	9.85507	-9.11801		68	-18.9558	-12.5273	0	-18.9558	-12.5273
104	7.73813	-8.66919	0	7.73813	-8.66919		69	-19.0582	-13.793	0	-19.0582	-13.793
105	8.66446	-9.91965	0	8.66446	-9.91965		70	-18.87	-13.8298	0	-18.87	-13.8298
106	9.7178	-10.6156	0	9.7178	-10.6156		71	-18.2312	-13.3049	0	-18.2312	-13.3049
107	9.10413	-10.3351	0	9.10413	-10.3351		72	-19.0976	-13.7727	0	-19.0976	-13.7727
108	10.4119	-11.1823	0	10.4119	-11.1823		73	-19.3834	-14.5618	0	-19.3834	-14.5618
109	6.81363	-10.5516	0	6.81363	-10.5516		74	-20.3949	-11.9141	0	-20.3949	-11.9141
110	4.06146	-10.5064	0	4.06146	-10.5064		75	-18.7126	-17.7217	0	-18.7126	-17.7217
111	3.85651	-11.7381	0	3.85651	-11.7381		76	-20.2377	-14.0489	0	-20.2377	-14.0489
112	6.01749	-12.7755	0	6.01749	-12.7755		77	-18.219	-16.5158	0	-18.219	-16.5158
113	7.96124	-12.8919	0	7.96124	-12.8919		78	-19.3597	-17.0243	0	-19.3597	-17.0243
114	8.5748	-11.6564	0	8.5748	-11.6564		79	-19.1523	-16.9116	0	-19.1523	-16.9116
115	9.49448	-11.6292	0	9.49448	-11.6292		80	-20.2809	-13.7964	0	-20.2809	-13.7964
116	10.6306	-11.6396	0	10.6306	-11.6396		81	-18.4072	-11.6688	0	-18.4072	-11.6688
117	2.20105	-7.42282	0	2.20105	-7.42282		82	-17.7252	-10.5018	0	-17.7252	-10.5018
118	2.06967	-6.61255	0	2.06967	-6.61255		83	-18.6118	-10.3989	0	-18.6118	-10.3989
119	0.990814	-6.43146	0	0.990814	-6.43146		84	-17.5148	-8.30072	0	-17.5148	-8.30072
120	0.302063	-6.70731	0	0.302063	-6.70731		85	-17.0132	-7.76825	0	-17.0132	-7.76825
121	0.103363	-7.26617	0	0.103363	-7.26617		86	-16.9604	-7.7005	0	-16.9604	-7.7005
122	-0.284882	-6.71146	0	-0.284882	-6.71146		87	-17.3493	-8.16656	0	-17.3493	-8.16656
123	-0.305603	-6.91446	0	-0.305603	-6.91446		88	-16.4874	-7.92773	0	-16.4874	-7.92773
124	-0.435822	-6.60522	0	-0.435822	-6.60522		89	-16.5483	-8.35046	0	-16.5483	-8.35046
125	-0.236053	-6.41284	0	-0.236053	-6.41284		90	-15.5342	-9.57098	0	-15.5342	-9.57098
126	-0.560425	-5.87042	0	-0.560425	-5.87042		91	-15.8451	-9.69348	0	-15.8451	-9.69348
127	-0.62207	-7.34378	0	-0.62207	-7.34378		92	-15.5382	-9.44318	0	-15.5382	-9.44318
128	-0.164154	-7.25125	0	-0.164154	-7.25125		93	-15.0015	-8.88348	0	-15.0015	-8.88348
129	-1.35922	-5.41818	0	-1.35922	-5.41818		94	-18.8297	-13.701	0	-18.8297	-13.701
130	-1.86093	-4.95685	0	-1.86093	-4.95685		95	-17.1966	-12.692	0	-17.1966	-12.692
131	-3.19196	-1.85956	0	-3.19196	-1.85956		96	-16.6497	-12.1183	0	-16.6497	-12.1183
132	-4.56708	-0.663666	0	-4.56708	-0.663666		97	-16.6682	-12.1537	0	-16.6682	-12.1537
133	-5.4187	0.717743	0	-5.4187	0.717743		98	-15.7294	-11.1002	0	-15.7294	-11.1002
134	-4.65799	1.37515	0	-4.65799	1.37515		99	-16.4849	-11.8642	0	-16.4849	-11.8642
135	-3.6875	1.30899	0	-3.6875	1.30899		100	-15.9759	-11.1672	0	-15.9759	-11.1672
136	-3.53055	0.942383	0	-3.53055	0.942383		101	-15.8222	-10.7723	0	-15.8222	-10.7723
1	0	0	0	0	0		102	-17.4371	-11.8807	0	-17.4371	-11.8807
2	-0.787262	-1.56213	0	-0.787262	-1.56213		103	-16.6029	-11.3575	0	-16.6029	-11.3575
3	-0.205719	0.718506	0	-0.205719	0.718506		104	-15.6118	-10.1792	0	-15.6118	-10.1792
4	-0.302368	-0.0571289	0	-0.302368	-0.0571289		105	-15.6239	-10.6329	0	-15.6239	-10.6329
5	0.273834	0.167175	0	0.273834	0.167175		106	-16.6008	-11.3164	0	-16.6008	-11.3164
6	-0.367188	-0.565918	0	-0.367188	-0.565918		107	-15.8367	-10.8181	0	-15.8367	-10.8181
7	-0.585312	-2.12189	0	-0.585312	-2.12189		108	-14.6305	-9.69458	0	-14.6305	-9.69458
8	-0.254776	-1.23944	0	-0.254776	-1.23944		109	-14.6828	-9.94885	0	-14.6828	-9.94885
9	-0.688232	-2.13898	0	-0.688232	-2.13898		110	-14.3722	-9.50189	0	-14.3722	-9.50189
10	0.183517	-1.51978	0	0.183517	-1.51978		111	-14.6522	-10.4122	0	-14.6522	-10.4122
11	-1.81274	-2.38153	0	-1.81274	-2.38153		112	-14.2122	-10.4617	0	-14.2122	-10.4617
12	-2.41052	-2.85828	0	-2.41052	-2.85828		113	-16.0625	-13.55	0	-16.0625	-13.55
13	-1.11917	-3.98456	0	-1.11917	-3.98456		114	-15.8152	-12.7168	0	-15.8152	-12.7168
14	-0.652496	-3.59003	0	-0.652496	-3.59003		115	-17.89	-12.5868	0	-17.89	-12.5868
15	-1.37393	-5.22137	0	-1.37393	-5.22137		116	-20.028	-13.968	0	-20.028	-13.968
16	0.315109	-5.34381	0	0.315109	-5.34381		117	-19.9806	-14.5414	0	-19.9806	-14.5414
17	0.33519	-6.38599	0	0.33519	-6.38599		118	-22.0693	-18.1302	0	-22.0693	-18.1302
18	0.263092	-7.0343	0	0.263092	-7.0343		119	-19.9865	-15.0256	0	-19.9865	-15.0256
19	0.379776	-6.46002	0	0.379776	-6.46002		120	-24.7582	-21.1398	0	-24.7582	-21.1398
20	0.670456	-7.6048	0	0.670456	-7.6048		121	-20.942	-18.0728	0	-20.942	-18.0728
21	0.763214	-5.72906	0	0.763214	-5.72906		122	-25.9268	-22.9784	0	-25.9268	-22.9784
22	-0.310928	-5.48932	0	-0.310928	-5.48932		123	-25.335	-22.7842	0	-25.335	-22.7842
23	0.196014	-7.23175	0	0.196014	-7.23175		124	-24.9929	-21.2938	0	-24.9929	-21.2938
24	0.294571	-6.00018	0	0.294571	-6.00018		125	-25.9629	-22.2481	0	-25.9629	-22.2481
25	0.10376	-7.06616	0	0.10376	-7.06616		126	-21.1549	-17.2738	0	-21.1549	-17.2738
26	0.16745	-5.99982	0	0.16745	-5.99982		127	-17.6122	-10.6165	0	-17.6122	-10.6165
27	0.883621	-5.82104	0	0.883621	-5.82104		128	-18.2871	-9.27844	0	-18.2871	-9.27844
28	1.31	-7.69885	0	1.31	-7.69885		129	-19.0287	-14.5402	0	-19.0287	-14.5402
29	0.774307	-6.07623	0	0.774307	-6.07623		130	-18.5326	-9.02411	0	-18.5326	-9.02411
30	2.07147	-8.29858	0	2.07147	-8.29858		131	-18.8345	-13.9043	0	-18.8345	-13.9043
31	1.90759	-9.28638	0	1.90759	-9.28638		132	-23.8554	-12.6927	0	-23.8554	-12.6927
32	2.85324	-9.06671	0	2.85324	-9.06671		133	-18.8259	-7.85724	0	-18.8259	-7.85724
33	2.71404	-9.76459	0	2.71404	-9.76459		134	-18.3087	-8.16016	0	-18.3087	-8.16016
34	2.38098	-9.31061	0	2.38098	-9.31061		135	-17.0565	-7.91608	0	-17.0565	-7.91608
35	2.59206	-9.7262	0	2.59206	-9.7262		136	-17.4601	-7.85449	0	-17.4601	-7.85449
36	4.32103	-9.74799	0	4.32103	-9.74799		137	-17.8257	-7.27618	0	-17.8257	-7.27618
37	2.92786	-9.80994	0	2.92786	-9.80994		138	-17.1362	-7.64612	0	-17.1362	-7.64612
38	3.20197	-10.1275	0	3.20197	-10.1275		1	0	0	0	0	0
39	2.33327	-10.3913	0	2.33327	-10.3913		2	0.0545349	0.0144653	0	0.0545349	0.0144653
40	1.99591	-10.2116	0	1.99591	-10.2116		3	0.275513	-0.649353	0	0.275513	-0.649353
41	3.09763	-10.0908	0	3.09763	-10.0908		4	0.774109	-1.17535	0	0.774109	-1.17535
42	3.43942	-10.6335	0	3.43942	-10.6335		5	0.349762	-0.488342	0	0.349762	-0.488342
43	4.68076	-10.934	0	4.68076	-10.934		6	0.502411	-0.901184	0	0.502411	-0.901184
44	2.97162	-11.7477	0	2.97162	-11.7477		7	0.45755	-0.904114	0	0.45755	-0.904114
45	3.81822	-10.8356	0	3.81822	-10.8356		8	0.460663	-1.81049	0	0.460663	-1.81049
46	3.69048	-10.7905	0	3.69048	-10.7905		9	0.725433	-1.28256	0	0.725433	-1.28256
47	4.00288	-11.1159	0	4.00288	-11.1159		10	0.620087	-1.8761	0	0.620087	-1.8761
48	2.88054	-10.4843	0	2.88054	-10.4843		11	0.311279	-1.82581	0	0.311279	-1.82581
49	4.58389	-11.4536	0	4.58389	-11.4536		12	0.561829	-2.80807	0	0.561829	-2.80807
50	4.41687	-11.4784	0	4.41687	-11.4784		13	0.92215	-3.28119	0	0.92215	-3.28119
51	5.742	-11.6305	0	5.742	-11.6305		14	0.937744	-3.27087	0	0.937744	-3.27087
52	4.916	-10.9976	0	4.916	-10.9976		15	1.18555	-3.6434	0	1.18555	-3.6434
53	5.36826	-9.73395	0	5.36826	-9.73395		16	0.78064	-4.72522	0	0.78064	-4.72522
54	6.58276	-9.63788	0	6.58276	-9.63788		17	1.29034	-5.16745	0	1.29034	-5.16745
55	5.7841	-9.90472	0	5.7841	-9.90472		18	1.36255	-5.80417	0	1.36255	-5.80417
56	6.84787	-10.2099	0	6.84787	-10.2099		19	1.04187	-5.96207	0	1.04187	-5.96207
57	7.44858	-9.3725	0	7.44858	-9.3725		20	-0.109009	-5.92618	0	-0.109009	-5.92618
58	7.59258	-10.1602	0	7.59258	-10.1602		21	0.22049	-6.32144	0	0.22049	-6.32144
59	7.11061	-9.24884	0	7.11061	-9.24884		22	0.256927	-6.68466	0	0.256927	-6.68466
60	8.20496	-10.114	0	8.20496	-10.114		23	0.413177	-7.32883	0	0.413177	-7.32883
61	8.51434	-9.18427	0	8.51434	-9.18427		24	0.620605	-7.12421	0	0.620605	-7.12421
62	7.10956	-9.29944	0	7.10956	-9.29944		25	0.805969	-8.09079	0	0.805969	-8.09079
63	7.66795	-8.8252	0	7.66795	-8.8252		26	0.837128	-8.65253	0	0.837128	-8.65253
64	7.66835	-8.7951	0	7.66835	-8.7951		27	0.749756	-8.81177	0	0.749756	-8.81177
65	7.54047	-8.35687	0	7.54047	-8.35687		28	0.984894	-9.23837	0	0.984894	-9.23837
66	7.69679	-8.85638	0	7.69679	-8.85638		29	1.25009	-10.0904	0	1.25009	-10.0904
67	7.89038	-8.42163	0	7.89038	-8.42163		30	1.41367	-9.76361	0	1.41367	-9.76361
68	8.32187	-8.12964	0	8.32187	-8.12964		31	1.5386	-10.1635	0	1.5386	-10.1635
69	8.3584	-7.12811	0	8.3584	-7.12811		32	0.875519	-10.7574	0	0.875519	-10.7574
70	8.27283	-7.49341	0	8.27283	-7.49341		33	0.738861	-10.6115	0	0.738861	-10.6115
71	8.8665	-8.63422	0	8.8665	-8.63422		34	1.17465	-11.4382	0	1.17465	-11.4382
72	8.92471	-7.4425	0	8.92471	-7.4425		35	1.16324	-10.9166	0	1.16324	-10.9166
73	8.24171	-7.03516	0	8.24171	-7.03516		36	1.53479	-11.1295	0	1.53479	-11.1295
74	7.95644	-6.12695	0	7.95644	-6.12695		37	1.63757	-11.4107	0	1.63757	-11.4107
75	7.85664	-4.83679	0	7.85664	-4.83679		38	1.99768	-11.9567	0	1.99768	-11.9567
76	7.70682	-4.70721	0	7.70682	-4.70721		39	1.71301	-11.5741	0	1.71301	-11.5741
77	7.78461	-5.64929	0	7.78461	-5.64929		40	2.06821	-12.011	0	2.06821	-12.011
78	6.39655	-4.81903	0	6.39655	-4.81903		41	2.14432	-12.3815	0	2.14432	-12.3815
79	6.82628	-4.08899	0	6.82628	-4.08899		42	2.99686	-12.5728	0	2.99686	-12.5728
80	6.37775	-3.83374	0	6.37775	-3.83374		43	3.35803	-13.8889	0	3.35803	-13.8889
81	6.05807	-3.87616	0	6.05807	-3.87616		44	4.09549	-14.8811	0	4.09549	-14.8811
82	5.68922	-3.74683	0	5.68922	-3.74683		45	4.89191	-15.8812	0	4.89191	-15.8812
83	5.98105	-2.95947	0	5.98105	-2.95947		46	4.93796	-16.7508	0	4.93796	-16.7508
84	5.57883	-3.20795	0	5.57883	-3.20795		47	5.07367	-16.9716	0	5.07367	-16.9716
85	5.54356	-2.21539	0	5.54356	-2.21539		48	5.16913	-17.2175	0	5.16913	-17.2175
86	5.92157	-1.30066	0	5.92157	-1.30066		49	5.08847	-17.4353	0	5.08847	-17.4353
87	5.81133	-2.0282	0	5.81133	-2.0282		50	5.39865	-17.6221	0	5.39865	-17.6221
88	6.90686	-2.39709	0	6.90686	-2.39709		51	5.74423	-17.8696	0	5.74423	-17.8696
89	5.90524	-1.87567	0	5.90524	-1.87567		52	5.82462	-18.223	0	5.82462	-18.223
90	7.40691	-2.54724	0	7.40691	-2.54724		53	5.52155	-18.5222	0	5.52155	-18.5222
91	7.03197	-1.87231	0	7.03197	-1.87231		54	5.99063	-18.8305	0	5.99063	-18.8305
92	6.24014	-2.14716	0	6.24014	-2.14716		55	6.60007	-19.5479	0	6.60007	-19.5479
93	6.27518	-2.32794	0	6.27518	-2.32794		56	6.71548	-19.5434	0	6.71548	-19.5434
94	5.98903	-3.16412	0	5.98903	-3.16412		57	7.12	-19.4995	0	7.12	-19.4995
95	6.04446	-2.97943	0	6.04446	-2.97943		58	7.52112	-19.9898	0	7.52112	-19.9898
96	6.03889	-4.09198	0	6.03889	-4.09198		59	8.02551	-20.5012	0	8.02551	-20.5012
97	6.00882	-4.38983	0	6.00882	-4.38983		60	8.09393	-20.7336	0	8.09393	-20.7336
98	6.27623	-3.78625	0	6.27623	-3.78625		61	8.78717	-21.1517	0	8.78717	-21.1517
99	6.86774	-3.44012	0	6.86774	-3.44012		62	9.7424	-22.1108	0	9.7424	-22.1108
100	5.9489	-4.67798	0	5.9489	-4.67798		63	9.58902	-22.8858	0	9.58902	-22.8858
101	5.79498	-4.34399	0	5.79498	-4.34399		64	9.65182	-23.4272	0	9.65182	-23.4272
102	6.46707	-4.41632	0	6.46707	-4.41632		65	10.1075	-23.938	0	10.1075	-23.938
103	6.66418	-3.69208	0	6.66418	-3.69208		66	10.7404	-24.6023	0	10.7404	-24.6023
104	7.01469	-4.91876	0	7.01469	-4.91876		67	11.0721	-25.0434	0	11.0721	-25.0434
105	6.78915	-4.22998	0	6.78915	-4.22998		68	11.5587	-25.6425	0	11.5587	-25.6425
106	7.2935	-4.63892	0	7.2935	-4.63892		69	11.2662	-25.329	0	11.2662	-25.329
107	7.7955	-4.78308	0	7.7955	-4.78308		70	12.1463	-26.3539	0	12.1463	-26.3539
108	8.1265	-4.89343	0	8.1265	-4.89343		71	12.312	-26.236	0	12.312	-26.236
109	8.47537	-4.54663	0	8.47537	-4.54663		72	12.1015	-25.2853	0	12.1015	-25.2853
110	8.25786	-4.69781	0	8.25786	-4.69781		73	12.5719	-27.1028	0	12.5719	-27.1028
111	8.36717	-4.47858	0	8.36717	-4.47858		74	12.9538	-27.3836	0	12.9538	-27.3836
112	9.45499	-3.58105	0	9.45499	-3.58105		75	12.6462	-27.251	0	12.6462	-27.251
113	8.60921	-3.95319	0	8.60921	-3.95319		76	13.0978	-27.5092	0	13.0978	-27.5092
114	9.60716	-3.8501	0	9.60716	-3.8501		77	13.0053	-27.4566	0	13.0053	-27.4566
115	9.02203	-3.7832	0	9.02203	-3.7832		78	12.928	-27.8685	0	12.928	-27.8685
116	9.84839	-3.16724	0	9.84839	-3.16724		79	12.7979	-27.7967	0	12.7979	-27.7967
117	9.9225	-2.50714	0	9.9225	-2.50714		80	13.3351	-27.9349	0	13.3351	-27.9349
118	10.0063	-2.87207	0	10.0063	-2.87207		81	13.8594	-28.779	0	13.8594	-28.779
119	9.63805	-2.45532	0	9.63805	-2.45532		82	14.3069	-29.6391	0	14.3069	-29.6391
120	9.9662	-2.28796	0	9.9662	-2.28796		83	14.7911	-30.2152	0	14.7911	-30.2152
121	9.54961	-2.88495	0	9.54961	-2.88495		84	14.8529	-30.2368	0	14.8529	-30.2368
122	10.3664	-2.75653	0	10.3664	-2.75653		85	14.9586	-31.397	0	14.9586	-31.397
123	10.0705	-3.30432	0	10.0705	-3.30432		86	15.1099	-31.8774	0	15.1099	-31.8774
124	10.1096	-3.31122	0	10.1096	-3.31122		87	15.0269	-31.6718	0	15.0269	-31.6718
125	9.99463	-2.52667	0	9.99463	-2.52667		88	15.4687	-32.7299	0	15.4687	-32.7299
126	11.337	-2.77631	0	11.337	-2.77631		89	15.2245	-33.211	0	15.2245	-33.211
127	12.3522	-3.32599	0	12.3522	-3.32599		90	15.5337	-34.5482	0	15.5337	-34.5482
128	12.5047	-3.40125	0	12.5047	-3.40125		91	16.0773	-34.988	0	16.0773	-34.988
129	12.7328	-2.60376	0	12.7328	-2.60376		92	16.2816	-35.718	0	16.2816	-35.718
130	12.2377	-2.92548	0	12.2377	-2.92548		93	16.481	-36.44	0	16.481	-36.44
131	12.9134	-2.86414	0	12.9134	-2.86414		94	17.4495	-37.0909	0	17.4495	-37.0909
132	13.6041	-3.1806	0	13.6041	-3.1806		95	16.9425	-37.2221	0	16.9425	-37.2221
133	13.6244	-3.54138	0	13.6244	-3.54138		96	16.9844	-38.5517	0	16.9844	-38.5517
134	13.8955	-2.74664	0	13.8955	-2.74664		97	17.1151	-38.64	0	17.1151	-38.64
135	13.5957	-3.36084	0	13.5957	-3.36084		98	17.3526	-38.7376	0	17.3526	-38.7376
136	13.8026	-3.89819	0	13.8026	-3.89819		99	17.4009	-39.2903	0	17.4009	-39.2903
1	0	0	0	0	0		100	17.547	-39.5535	0	17.547	-39.5535
2	0.0205688	-1.0975	0	0.0205688	-1.0975		101	18.2519	-38.7931	0	18.2519	-38.7931
3	-0.476715	-0.57901	0	-0.476715	-0.57901		102	17.7915	-40.7499	0	17.7915	-40.7499
4	-0.124573	-0.260162	0	-0.124573	-0.260162		103	18.0016	-40.7873	0	18.0016	-40.7873
5	-0.690552	0.0694275	0	-0.690552	0.0694275		104	17.9192	-41.6409	0	17.9192	-41.6409
6	-0.214996	-0.279785	0	-0.214996	-0.279785		105	18.1644	-42.0322	0	18.1644	-42.0322
7	-0.711639	-0.478302	0	-0.711639	-0.478302		106	18.2944	-41.7083	0	18.2944	-41.7083
8	-0.478607	0.146851	0	-0.478607	0.146851		107	17.6662	-41.2978	0	17.6662	-41.2978
9	-0.246521	-0.250763	0	-0.246521	-0.250763		108	17.3803	-41.1356	0	17.3803	-41.1356
10	-0.46936	-0.0911255	0	-0.46936	-0.0911255		109	17.3412	-40.4326	0	17.3412	-40.4326
11	-0.776733	-0.292969	0	-0.776733	-0.292969		110	17.7374	-39.951	0	17.7374	-39.951
12	-0.100922	-1.02441	0	-0.100922	-1.02441		111	17.6956	-39.7506	0	17.6956	-39.7506
13	-0.608612	-0.57312	0	-0.608612	-0.57312		112	17.6542	-39.1328	0	17.6542	-39.1328
14	-1.08618	-0.43689	0	-1.08618	-0.43689		113	18.8087	-39.2257	0	18.8087	-39.2257
15	-0.485748	-1.17865	0	-0.485748	-1.17865		114	20.3915	-39.568	0	20.3915	-39.568
16	-0.786041	-0.792938	0	-0.786041	-0.792938		115	21.7721	-40.4417	0	21.7721	-40.4417
17	-1.31284	-0.789185	0	-1.31284	-0.789185		116	21.2615	-40.6947	0	21.2615	-40.6947
18	-0.784271	-0.680664	0	-0.784271	-0.680664		117	20.5641	-40.0438	0	20.5641	-40.0438
19	-0.79538	-1.69513	0	-0.79538	-1.69513		118	20.2397	-39.4272	0	20.2397	-39.4272
20	-1.16516	-1.76041	0	-1.16516	-1.76041		119	21.5698	-39.0737	0	21.5698	-39.0737
21	-0.92807	-1.43817	0	-0.92807	-1.43817		120	23.0966	-39.3449	0	23.0966	-39.3449
22	-0.836395	-1.57571	0	-0.836395	-1.57571		121	23.2076	-39.5415	0	23.2076	-39.5415
23	-0.32608	-1.80826	0	-0.32608	-1.80826		122	23.1111	-39.2451	0	23.1111	-39.2451
24	-0.97168	-2.31824	0	-0.97168	-2.31824		123	21.3152	-38.8558	0	21.3152	-38.8558
25	-0.902649	-2.3725	0	-0.902649	-2.3725		124	21.0472	-38.4189	0	21.0472	-38.4189
26	-1.5733	-2.43756	0	-1.5733	-2.43756		125	20.6882	-39.4288	0	20.6882	-39.4288
27	-1.436	-2.81049	0	-1.436	-2.81049		126	20.292	-40.2649	0	20.292	-40.2649
28	-1.39252	-2.94119	0	-1.39252	-2.94119		127	19.6489	-40.9276	0	19.6489	-40.9276
29	-1.48495	-2.63306	0	-1.48495	-2.63306		128	19.7191	-39.9136	0	19.7191	-39.9136
30	-1.45706	-2.26102	0	-1.45706	-2.26102		129	19.1234	-40.2642	0	19.1234	-40.2642
31	-1.3862	-2.75537	0	-1.3862	-2.75537		130	19.5511	-39.3293	0	19.5511	-39.3293
32	-1.31458	-2.54056	0	-1.31458	-2.54056		131	20.0015	-38.7896	0	20.0015	-38.7896
33	-1.67435	-2.91656	0	-1.67435	-2.91656		132	19.894	-37.4205	0	19.894	-37.4205
34	-1.76505	-3.09247	0	-1.76505	-3.09247		133	18.003	-39.1766	0	18.003	-39.1766
35	-2.04871	-2.64893	0	-2.04871	-2.64893		134	17.4405	-40.362	0	17.4405	-40.362
36	-2.01434	-2.93454	0	-2.01434	-2.93454		135	16.968	-41.0695	0	16.968	-41.0695
37	-1.74423	-2.78607	0	-1.74423	-2.78607		136	17.9154	-41.4839	0	17.9154	-41.4839
38	-1.68918	-3.1571	0	-1.68918	-3.1571		137	19.9435	-42.3127	0	19.9435	-42.3127
39	-1.72372	-3.07053	0	-1.72372	-3.07053		138	21.7578	-40.7736	0	21.7578	-40.7736
40	-2.58893	-2.6857	0	-2.58893	-2.6857		1	0	0	0	0	0
41	-3.21365	-2.50375	0	-3.21365	-2.50375		2	-0.0103149	-0.0567017	0	-0.0103149	-0.0567017
42	-2.95184	-2.58521	0	-2.95184	-2.58521		3	-0.234161	0.262695	0	-0.234161	0.262695
43	-3.0267	-2.49536	0	-3.0267	-2.49536		4	-0.119751	0.0368652	0	-0.119751	0.0368652
44	-2.81879	-3.24405	0	-2.81879	-3.24405		5	-0.385529	0.397461	0	-0.385529	0.397461
45	-2.9325	-2.8848	0	-2.9325	-2.8848		6	-0.0173645	0.143555	0	-0.0173645	0.143555
46	-2.44128	-3.49759	0	-2.44128	-3.49759		7	-0.240875	0.345276	0	-0.240875	0.345276
47	-2.40811	-2.79932	0	-2.40811	-2.79932		8	0.305786	0.229492	0	0.305786	0.229492
48	-2.5004	-3.23032	0	-2.5004	-3.23032		9	0.407959	0.312927	0	0.407959	0.312927
49	-2.46213	-3.27798	0	-2.46213	-3.27798		10	0.359985	-0.0109253	0	0.359985	-0.0109253
50	-2.4938	-3.22241	0	-2.4938	-3.22241		11	0.708099	1.10272	0	0.708099	1.10272
51	-1.86472	-3.64664	0	-1.86472	-3.64664		12	-0.223938	0.833069	0	-0.223938	0.833069
52	-1.71542	-3.63806	0	-1.71542	-3.63806		13	0.1091	1.85822	0	0.1091	1.85822
53	-1.87451	-3.16284	0	-1.87451	-3.16284		14	0.211456	2.39825	0	0.211456	2.39825
54	-1.49832	-3.27701	0	-1.49832	-3.27701		15	-0.290619	2.63153	0	-0.290619	2.63153
55	-2.22064	-0.952026	0	-2.22064	-0.952026		16	-0.474121	2.61798	0	-0.474121	2.61798
56	-2.00034	-3.36786	0	-2.00034	-3.36786		17	-0.636047	2.54022	0	-0.636047	2.54022
57	-1.79892	-3.21075	0	-1.79892	-3.21075		18	-0.6297	2.37714	0	-0.6297	2.37714
58	-2.44778	-3.14746	0	-2.44778	-3.14746		19	-0.81546	2.48517	0	-0.81546	2.48517
59	-1.9335	-3.23792	0	-1.9335	-3.23792		20	-2.47842	2.00842	0	-2.47842	2.00842
60	-1.60754	-3.84183	0	-1.60754	-3.84183		21	-1.95483	3.65607	0	-1.95483	3.65607
61	-1.73096	-3.47403	0	-1.73096	-3.47403		22	-1.86154	3.68115	0	-1.86154	3.68115
62	-1.45602	-3.64389	0	-1.45602	-3.64389		23	-1.52664	3.74951	0	-1.52664	3.74951
63	-1.42764	-3.19034	0	-1.42764	-3.19034		24	-2.01624	2.2132	0	-2.01624	2.2132
64	-1.4447	-3.2193	0	-1.4447	-3.2193		25	-2.31683	2.2655	0	-2.31683	2.2655
65	-1.3591	-2.99173	0	-1.3591	-2.99173		26	-1.31775	2.17438	0	-1.31775	2.17438
66	-1.3497	-2.2478	0	-1.3497	-2.2478		27	-1.41586	3.32776	0	-1.41586	3.32776
67	-1.26511	-2.49634	0	-1.26511	-2.49634		28	-1.754	4.12506	0	-1.754	4.12506
68	-1.22324	-3.2178	0	-1.22324	-3.2178		29	-1.59967	3.28174	0	-1.59967	3.28174
69	-0.87677	-2.47446	0	-0.87677	-2.47446		30	-0.933624	3.87091	0	-0.933624	3.87091
70	-1.00244	-3.33102	0	-1.00244	-3.33102		31	-0.0245667	3.89984	0	-0.0245667	3.89984
71	-0.711426	-3.44241	0	-0.711426	-3.44241		32	0.685425	3.88983	0	0.685425	3.88983
72	-0.724182	-3.67697	0	-0.724182	-3.67697		33	1.06219	3.83685	0	1.06219	3.83685
73	-0.599182	-3.5748	0	-0.599182	-3.5748		34	0.767029	1.80438	0	0.767029	1.80438
74	-1.1843	-3.8013	0	-1.1843	-3.8013		35	1.04388	2.37506	0	1.04388	2.37506
75	-0.598297	-4.00311	0	-0.598297	-4.00311		36	1.4805	3.63885	0	1.4805	3.63885
76	-0.722778	-4.34412	0	-0.722778	-4.34412		37	3.09384	3.88666	0	3.09384	3.88666
77	-0.757019	-4.35764	0	-0.757019	-4.35764		38	3.13104	3.09052	0	3.13104	3.09052
78	-0.583313	-4.10959	0	-0.583313	-4.10959		39	1.79596	3.14038	0	1.79596	3.14038
79	-0.651154	-4.40182	0	-0.651154	-4.40182		40	2.16711	3.96765	0	2.16711	3.96765
80	-0.700287	-4.58243	0	-0.700287	-4.58243		41	3.17886	3.77881	0	3.17886	3.77881
81	-0.448303	-4.78067	0	-0.448303	-4.78067		42	3.05222	3.99176	0	3.05222	3.99176
82	-0.64563	-4.60193	0	-0.64563	-4.60193		43	2.71036	3.61499	0	2.71036	3.61499
83	-0.423065	-4.32397	0	-0.423065	-4.32397		44	3.09027	3.14722	0	3.09027	3.14722
84	0.143066	-5.33942	0	0.143066	-5.33942		45	3.5148	2.29004	0	3.5148	2.29004
85	-0.119598	-5.11224	0	-0.119598	-5.11224		46	1.07709	1.974	0	1.07709	1.974
86	-0.370148	-5.15717	0	-0.370148	-5.15717		47	1.36102	1.45966	0	1.36102	1.45966
87	0.0133057	-5.07114	0	0.0133057	-5.07114		48	0.17804	4.13599	0	0.17804	4.13599
88	-0.537201	-5.18262	0	-0.537201	-5.18262		49	0.434998	3.89197	0	0.434998	3.89197
89	-0.417969	-5.02557	0	-0.417969	-5.02557		50	0.785492	4.17902	0	0.785492	4.17902
90	-0.43219	-4.93826	0	-0.43219	-4.93826		51	1.00012	4.3208	0	1.00012	4.3208
91	-1.15024	-4.76675	0	-1.15024	-4.76675		52	1.28561	5.21936	0	1.28561	5.21936
92	-0.533295	-4.65787	0	-0.533295	-4.65787		53	-0.615936	2.30768	0	-0.615936	2.30768
93	-1.49384	-4.44394	0	-1.49384	-4.44394		54	-0.921875	1.99139	0	-0.921875	1.99139
94	-1.74194	-4.36136	0	-1.74194	-4.36136		55	-0.960449	1.85919	0	-0.960449	1.85919
95	-1.67511	-4.85587	0	-1.67511	-4.85587		56	-0.404083	1.81989	0	-0.404083	1.81989
96	-1.81183	-3.98584	0	-1.81183	-3.98584		57	-0.174072	1.78589	0	-0.174072	1.78589
97	-2.29855	-1.94992	0	-2.29855	-1.94992		58	-0.568573	1.7019	0	-0.568573	1.7019
98	-1.99655	-4.35873	0	-1.99655	-4.35873		59	-0.0214233	1.39807	0	-0.0214233	1.39807
99	-2.23956	-4.72174	0	-2.23956	-4.72174		60	-0.665314	1.71295	0	-0.665314	1.71295
100	-3.02426	-3.88742	0	-3.02426	-3.88742		61	-0.334778	4.70337	0	-0.334778	4.70337
101	-2.62161	-3.89062	0	-2.62161	-3.89062		62	0.434082	3.80756	0	0.434082	3.80756
102	-2.36545	-3.93637	0	-2.36545	-3.93637		63	-0.881226	2.90057	0	-0.881226	2.90057
103	-2.91434	-3.95084	0	-2.91434	-3.95084		64	-1.11307	4.22418	0	-1.11307	4.22418
104	-2.71216	-4.11615	0	-2.71216	-4.11615		65	1.63336	6.33521	0	1.63336	6.33521
[truncated: 11,309 more rows]

## Sheet: Fig 5G
Time(min)	WT		KO
	Mean	SEM	Mean	SEM
0.25	2.36893	0.128407	2.4204	0.143417
0.5	4.04556	0.216664	4.69127	0.285252
0.75	6.04506	0.326776	7.68349	0.49174
1	8.30223	0.460468	11.144	0.734105
1.25	10.6727	0.613403	14.899	1.01023
1.5	13.2541	0.789046	19.0854	1.32393
1.75	15.9137	0.956194	23.1134	1.61414
2	18.7061	1.13674	27.7166	1.96011
2.25	21.484	1.32338	32.5975	2.33062
2.5	24.6577	1.52634	37.6407	2.73552
2.75	27.6583	1.72632	42.6319	3.15984
3	30.4132	1.88308	47.8867	3.59039
3.25	33.484	2.08043	53.2079	4.03278
3.5	36.5678	2.28444	58.6237	4.48361
3.75	39.7356	2.49534	64.0746	4.94479
4	43.0396	2.72751	68.2053	5.28034
4.25	46.2888	2.95912	73.6125	5.75444
4.5	49.5129	3.19415	79.1544	6.29074
4.75	53.0099	3.45559	83.3535	6.7519
5	55.8727	3.6996	88.7208	7.25389
5.25	59.7787	3.99263	94.0872	7.7612
5.5	62.9232	4.27674	99.4647	8.27775
5.75	66.4206	4.55467	104.763	8.80433
6	70.2072	4.86451	110.772	9.38674
6.25	73.7148	5.15368	116.12	9.95291
6.5	76.8602	5.46424	121.474	10.533
6.75	80.4607	5.76938	126.775	11.1233
7	84.5241	6.09991	132.695	11.7767
7.25	88.1623	6.41901	138.031	12.3876
7.5	90.835	6.71706	144.208	13.0662
7.75	91.6246	6.66434	149.599	13.7082
8	94.9281	6.94987	155.216	14.6243
8.25	98.2413	7.23744	160.652	15.3174
8.5	101.508	7.52756	165.957	16.0261
8.75	104.996	7.90558	172.386	16.8356
9	108.261	8.2067	177.668	17.5784
9.25	111.576	8.51221	182.924	18.3378
9.5	113.757	8.80391	188.209	19.1107
9.75	116.684	9.1601	193.401	19.9047
10	119.371	9.52395	199.414	20.8348
10.25	122.751	9.92502	204.613	21.6652
10.5	123.581	10.2133	209.859	22.5046
10.75	126.37	10.5016	217.317	23.6132
11	129.179	10.7937	223.558	24.6347
11.25	131.86	11.0733	228.827	25.5101
11.5	134.965	11.4152	234.048	26.4059
11.75	137.643	11.6945	239.263	27.3216
12	140.249	11.9683	244.49	28.2671
12.25	143.295	12.3831	249.736	29.2207
12.5	145.831	12.659	254.911	30.1516
12.75	148.36	12.9283	259.964	31.0559
13	150.841	13.1943	264.98	31.9501
13.25	153.295	13.4592	269.919	32.8504
13.5	155.736	13.7245	274.8	33.7506
13.75	158.133	13.9901	279.706	34.6829
14	160.523	14.2526	284.505	35.6162
14.25	162.896	14.5168	289.252	36.5366
14.5	165.502	14.8745	290.565	37.5698
14.75	167.281	15.2317	295.095	38.53
15	170.402	15.6802	299.61	39.5018
15.25	172.642	15.9403	304.04	40.4825
15.5	174.878	16.1974	308.426	41.4563
15.75	170.072	14.9885	314.078	42.7041
16	172.036	15.1888	318.321	43.722
16.25	173.918	15.3889	322.556	44.7772
16.5	176.393	15.6881	326.838	45.8603
16.75	178.175	15.891	331.107	46.9386
17	179.864	16.0837	335.218	47.994
17.25	181.464	16.2761	339.254	49.0928
17.5	183.05	16.4811	343.205	50.2041
17.75	184.536	16.6874	348.521	51.6861
18	186.503	17.0031	354.396	53.2049
18.25	187.916	17.209	358.193	54.4001
18.5	189.299	17.5371	361.93	55.5914
18.75	190.647	17.7348	367.461	57.1782
19	192.907	18.0314	369.179	58.8052
19.25	194.105	18.2087	371.464	61.2792
19.5	195.366	18.3914	375.302	62.6301
19.75	196.561	18.5646	379.146	63.9759
20	197.809	18.7537	382.97	65.3301
20.25	199.098	18.9443	389.449	67.6319
20.5	201.521	19.2359	394.005	69.5238
20.75	203.858	19.5473	342.873	44.9451
21	200.23	19.71	347.717	46.0266
21.25	201.517	19.9293	350.729	46.8327
21.5	202.828	20.1523	351.486	48.524
21.75	204.179	20.3722	354.701	49.4126
22	201.383	20.6942	358.054	50.3656
22.25	202.762	20.9412	362.787	51.708
22.5	204.115	21.1872	358.981	52.597
22.75	205.868	21.9243	364.596	53.9478
23	207.281	22.183	369.777	55.3439
23.25	199.629	20.7111	373.387	56.3237
23.5	190.455	19.66	378.137	58.1981
23.75	192.131	20.1679	366.655	57.3148
24	185.683	20.0628	373.343	59.2243
24.25	185.418	20.9564	356.627	60.0319
24.5	187.978	21.7371	361.45	64.934
24.75	189.606	23.528	375.548	74.493

## Sheet: Fig 5H
1_WT_0Ca_ADP	1_KO_0Ca_ADP
5.4	3.6
7.8	10.2
3	3
4.2	3
2.4	4.8
1.8	6.6
2.4	3.6
4.2	3.6
3	6
1.2	4.2
3	3
4.2	6
5.4	3.6
7.8	1.8
3	12
4.2	6.6
4.2	3.6
9.6	4.2
5.4	6.6
3.6	7.8
3	3
3	4.8
7.2	4.2
7.2	6.6
1.8	7.8
4.2	5.4
3	1.8
3	4.2
4.2	4.2
3	2.4
4.2	6
4.8	6
4.2	3
2.4	7.2
3	6
3.6	2.4
7.2	4.8
3	4.2
1.8	3.6
1.8	2.4
9	6
3.6	7.2
6	5.4
4.2	6
1.8	4.8
3	3
1.8	5.4
9.6	6
2.4	1.8
4.8	6
4.8	1.8
8.4	5.4
2.4	3.6
1.8	3.6
1.8	5.4
2.4	7.2
5.4	3
9	4.8
5.4	5.4
9	2.4
6	7.2
4.2	2.4
2.4	3.6
1.2	5.4
2.4	7.8
6	3
4.8	3
2.4	11.4
1.8	3.6
3.6	5.4
19.2	9.6
3.6	1.8
5.4	6
6	4.2
3	4.2
3	4.2
3.6	3
4.8	3.6
6.6	6.6
15.6	3
2.4	10.2
6.6	3
1.2	4.8
3	3.6
5.4	5.4
4.2	7.8
2.4	3
0.6	2.4
5.4	4.2
11.4	3
1.8	3
6.6	8.4
3	5.4
9	3
6	4.8
1.8	3
6	9.6
5.4	5.4
3	5.4
3	8.4
1.8	5.4
3.6	9.6
4.8	3.6
0.6	4.8
5.4	3.6
3.6	7.2
10.2	4.8
15	4.2
3.6	3.6
6.6	7.2
12	3
7.8	3
9	7.2
0.6	4.2
0.6	12
1.8	6
1.2	2.4
1.8	3.6
6.6	6
1.2	4.8
4.8	3
1.8	3
11.4	3
6	1.8
4.2	7.2
	8.4
	5.4
	4.8
	2.4
	6.6
	3
	3
	7.8
	8.4
	6
	6.6
	4.8
	3
	5.4
	3.6
	6
	8.4
	7.2
	3
	4.2
	7.2
	3
	6.6
	3
	1.8
	10.2
	4.8
	1.2
	2.4
	7.2
	7.8
	7.2
	4.2
	3
	16.2
	4.2
	4.8
	3
	6
	7.2
	3.6
	3
	6
	1.8
	9
	4.2
	4.2
	5.4
	11.4
	13.8
	5.4
	3
	9.6
	10.2
	7.2
	10.8
	5.4
	1.8
	9.6
	2.4
	3
	8.4
	7.8
	5.4
	6.6
	2.4
	3.6
	3
	4.8
	2.4
	3.6
	9.6
	8.4
	9.6
	3.6
	7.2
	3
	5.4
	1.8
	13.8
	6.6
	9.6
	8.4
	9.6
	4.2
	6.6
	6
	4.2
	5.4
	12.6
	7.2
	6.6
	5.4
	3
	8.4
	5.4
	1.8
	2.4
	4.8
	5.4
	2.4
	4.8
	4.8
	4.2
	2.4
	4.2
	3.6
	6
	7.2
	5.4
	3.6
	6.6
	4.2
	5.4
	3
	11.4
	5.4
	5.4
	4.8
	7.2
	4.8
	3.6
	4.2
	2.4
	4.8
	10.8
	7.2
	4.2
	6.6
	15.6
	3
	4.8
	4.2
	4.2
	2.4
	7.8
	1.8
	3.6
	4.2
	9.6
	3
	11.4
	0
	1.2
	6
	7.8
	5.4
	1.8
	3
	13.2
	12.6
	11.4
	16.2
	12
	1.2

## Sheet: Fig 5I
1_WT_0Ca_ADP	1_KO_0Ca_ADP
1.20138	3.48835
5.74711	8.12827
6.46145	3.79682
6.46145	8.30724
3.73644	3.73349
5.35718	3.10899
1.29111	4.84076
1.84814	3.78488
4.01564	9.24661
2.48209	7.46067
3.48501	2.48751
31.3077	10.344
6.8925	4.83524
1.59363	9.24464
2.7678	2.21271
12.06	3.42161
22.9112	0.874215
10.6562	8.05438
1.08271	5.47874
4.24963	13.4936
3.89105	16.3359
4.58619	9.77364
1.03989	5.50552
22.68	11.1305
2.59454	10.0693
3.50619	0.573486
1.48694	6.2064
0.565582	8.8367
1.08195	6.71188
7.59241	3.00418
0.49299	22.7258
0.891446	3.32309
5.14116	6.56412
3.29058	6.192
2.94604	7.17368
3.33828	5.5019
2.95103	4.54704
2.99979	2.25725
5.42695	8.35836
0.9208	3.53366
3.43209	4.54437
0.514788	6.52567
4.53458	2.47388
0.873735	8.36009
0.175536	6.02315
4.38243	3.3087
3.95644	2.9187
6.631	1.00682
2.53948	7.44134
4.64089	2.27376
4.85363	4.78867
3.82794	2.79471
3.98847	4.47753
0.598199	1.80144
2.67347	4.97083
2.3081	3.51063
6.11689	7.3659
31.2518	6.58321
4.86735	4.80461
6.51159	4.40564
10.2694	4.16709
2.59517	2.2567
4.99988	10.2284
0.696569	4.71926
0.473265	1.79448
5.52317	5.61714
0.901082	2.30752
2.74363	5.58435
4.64729	9.3363
4.99816	6.16368
16.2893	4.47845
2.12608	26.2093
1.97873	11.4333
3.6472	10.2231
3.31366	6.44013
11.8783	7.43204
2.87577	7.38663
3.75477	7.32158
4.96681	7.79851
1.6918	3.7059
5.6883	3.12009
4.92627	6.41462
1.32944	17.6128
1.30948	7.93746
5.84223	6.62178
10.0475	2.48659
4.07375	3.79755
1.70844	0.520528
5.21868	7.20756
5.50487	2.54367
4.35912	2.37621
19.4276	3.95726
1.13765	7.03653
4.979	3.55542
3.51109	4.19371
4.42774	0.892702
14.2044	1.70465
16.105	3.32126
2.46336	2.35415
6.79894	1.13747
2.56401	6.59877
3.54917	2.90658
2.89317	0.305936
3.5079	3.66657
5.60053	11.4503
6.91025	23.3673
3.01507	8.1894
4.91706	5.8148
6.59456	8.84694
11.8248	6.36067
13.2391	5.35873
1.03306	2.24531
6.59083	3.76695
2.81124	24.5464
0.100691	3.26925
8.30348	2.34403
2.27572	10.3838
1.31648	2.85281
21.622	3.35988
5.05274	3.39895
15.5158	11.0092
5.00149	4.00791
29.2682	4.91895
17.0414	2.72122
17.1162	6.02494
	6.06474
	15.1663
	10.1968
	8.05132
	9.78596
	6.47644
	11.8632
	10.5097
	7.65302
	2.4147
	7.0421
	13.7056
	4.41775
	4.78069
	10.5033
	3.6355
	7.86847
	8.09001
	4.05673
	5.59323
	6.71594
	22.8198
	23.412
	0.948263
	3.23515
	10.1681
	0.757384
	1.4312
	4.24666
	16.2775
	6.1345
	6.62305
	1.21253
	27.9133
	4.05674
	5.17158
	2.71889
	10.7327
	3.87949
	2.25318
	2.96675
	3.10162
	4.92788
	7.56932
	6.48618
	13.9806
	7.97882
	3.96249
	3.95733
	1.88332
	7.88666
	7.75244
	24.3498
	4.57924
	7.23537
	5.61212
	8.40429
	1.56599
	1.01028
	0.6536
	1.75746
	2.90289
	4.71786
	7.01865
	8.59453
	7.01893
	13.8106
	11.6088
	3.71948
	6.32247
	2.46013
	11.8053
	1.67169
	1.24506
	5.89104
	5.34321
	6.95855
	5.5542
	8.26868
	9.12079
	0.396693
	2.92296
	3.30144
	16.9603
	3.3171
	5.84222
	17.1257
	1.96014
	12.7899
	4.71522
	43.2261
	8.87164
	7.79819
	13.2314
	8.61541
	3.5579
	10.1012
	5.01836
	9.9942
	2.72743
	6.34151
	27.9481
	4.88554
	6.40351
	6.59624
	10.9937
	17.2188
	9.96547
	19.4986
	7.65456
	7.59525
	18.6832
	6.31918
	6.66467
	15.6722
	3.96632
	3.85887
	13.8532
	12.8317
	13.7023
	5.37782
	2.80205
	18.179
	12.5259
	19.6705
	6.77712
	2.87032
	22.1846
	11.1157
	4.56379
	28.1324
	9.83652
	7.63635
	15.7878
	9.33106
	4.51508
	27.7422
	11.8473
	24.1036
	9.59166
	28.7738
	1.89461
	1.25973
	5.09811
	13.962
	14.4697
	5.63674
	7.47676
	24.1298
	46.6659
	39.7271
	42.1065
	30.6853
	2.99573

## Sheet: Fig 5J
1_WT_0Ca_ADP	1_KO_0Ca_ADP
0.07524	0.19396
0.015612	0.035009
0.191667	0.284547
0.155224	0.139188
0.158835	0.180376
0.298597	0.056051
0.058494	0.091353
0.043662	0.139859
0.124298	0.063767
0.192754	0.221356
0.116883	0.259245
0.758542	0.04071
0.129181	0.285428
0.020854	0.240276
0.099673	0.076739
0.296137	0.032729
0.558751	0.095973
0.112999	0.019627
0.020903	0.12443
0.115208	0.071658
0.128275	0.459323
0.162455	0.351588
0.014265	0.248839
0.303989	0.080321
0.151367	0.148129
0.089619	0.185474
0.04539	0.030173
0.020821	0.144211
0.024572	0.220721
0.236097	0.284089
0.012266	0.052494
0.01943	0.397785
0.122278	0.106617
0.133979	0.091794
0.10014	0.105382
0.091134	0.274533
0.042389	0.118742
0.103648	0.106455
0.293831	0.059039
0.059461	0.358719
0.039401	0.057123
0.013659	0.062019
0.073823	0.122814
0.021377	0.039457
0.009703	0.176969
0.140159	0.192653
0.262016	0.061601
0.068938	0.046632
0.09556	0.049669
0.098716	0.124866
0.106049	0.117834
0.045654	0.090661
0.148967	0.084631
0.035611	0.117701
0.128682	0.035021
0.086906	0.069317
0.110407	0.110561
0.354623	0.147468
0.093301	0.125059
0.072243	0.196048
0.173642	0.063069
0.065204	0.168601
0.187758	0.058862
0.057953	0.18484
0.01834	0.061656
0.093014	0.064948
0.018998	0.187041
0.124027	0.020157
0.260404	0.143222
0.142648	0.180578
0.085843	0.065991
0.058382	0.225879
0.038124	0.437365
0.062016	0.256257
0.10278	0.241468
0.439699	0.152074
0.074697	0.268675
0.078951	0.223266
0.072746	0.11388
0.010892	0.260643
0.242598	0.036947
0.073396	0.095558
0.090325	0.128344
0.041957	0.518485
0.111778	0.153211
0.24452	0.088086
0.159031	0.085259
0.207841	0.148231
0.092266	0.012321
0.047266	0.246475
0.216767	0.086775
0.302748	0.027736
0.034982	0.070431
0.055067	0.239247
0.056335	0.07725
0.269811	0.139478
0.233989	0.009258
0.289059	0.032302
0.087015	0.063992
0.241285	0.028697
0.139301	0.02127
0.09937	0.067089
0.062149	0.077816
0.507445	0.006397
0.105336	0.109751
0.195488	0.164955
0.030368	0.473297
0.033027	0.191318
0.179756	0.173111
0.17944	0.120252
0.113132	0.21308
0.013093	0.183491
0.072536	0.031035
0.89726	0.096079
0.016166	0.201497
0.534819	0.057333
0.214597	0.09199
0.080547	0.2832
0.341938	0.046363
0.356586	0.069552
0.312406	0.119211
0.299852	0.348633
0.254797	0.145068
0.298072	0.236448
0.391225	0.038119
	0.073821
	0.118443
	0.303109
	0.397494
	0.125304
	0.327742
	0.198899
	0.148533
	0.128864
	0.129314
	0.037988
	0.141377
	0.494059
	0.07825
	0.135614
	0.181543
	0.043615
	0.111621
	0.270724
	0.10364
	0.079836
	0.229107
	0.360428
	0.819072
	0.05466
	0.032023
	0.22415
	0.057335
	0.063116
	0.059505
	0.214845
	0.083464
	0.15483
	0.038771
	0.172716
	0.096142
	0.113637
	0.090629
	0.174007
	0.05421
	0.061663
	0.105356
	0.052579
	0.271822
	0.082029
	0.160512
	0.347245
	0.149166
	0.034576
	0.028905
	0.034269
	0.26989
	0.078782
	0.239008
	0.06285
	0.06873
	0.099209
	0.405115
	0.016291
	0.047777
	0.021186
	0.021151
	0.036008
	0.090779
	0.104008
	0.327826
	0.195964
	0.448038
	0.241511
	0.147722
	0.191359
	0.026277
	0.139781
	0.017522
	0.032814
	0.084805
	0.189008
	0.135881
	0.338468
	0.060463
	0.132239
	0.00426
	0.034212
	0.034248
	0.398449
	0.051494
	0.10196
	0.422089
	0.035056
	0.099418
	0.068192
	0.676612
	0.157704
	0.261731
	0.158602
	0.156474
	0.173321
	0.466416
	0.104996
	0.192734
	0.129127
	0.133314
	0.571913
	0.109229
	0.27075
	0.150551
	0.332983
	0.285529
	0.142811
	0.366175
	0.212538
	0.117061
	0.415257
	0.113294
	0.245207
	0.140502
	0.076543
	0.073572
	0.271782
	0.184111
	0.277977
	0.158649
	0.066884
	0.684561
	0.248631
	0.178395
	0.092247
	0.066412
	0.348703
	0.071953
	0.14917
	0.608657
	0.236016
	0.192453
	0.656492
	0.117646
	0.246149
	0.742754
	0.266216
	0.248
	0.305927
	0.258505
	0.771376
	0.088557
	0.0817
	0.182532
	0.271413
	0.271404
	0.228977
	0.186264
	0.377945
	0.342891
	0.258098
	0.258467
	0.205876

[truncated: 10 more sheets: Fig 5L, Fig 5M, Figure 5 Supp 1 Panel A, Figure 5 Supp 1 Panel B, Figure 5 Supp 1 Panel C, Figure 5 Supp 1 Panel D, Figure 5 Supp 2A, Figure 5 Supp2B, Figure 5 Supp2C, Figure 5 Supp2D]
