# Supplementary material for: TREM2 regulates purinergic receptor-mediated calcium signaling and motility in human iPSC-derived microglia
Source: eLife. 2022 Feb 22;11:e73021. doi: 10.7554/eLife.73021 (PMC8906810; doi:10.7554/eLife.73021)
Supplement: Figure 6—source data 1. — In this dataset, the results showing the effect of calcium levels on motility in TREM2 wild type (WT) and KO cells are included. [file elife-73021-fig6-data1.xlsx]

## Sheet: Figure 6B
			Figure 6B
			Average trace:
		X-axis: Time (sec), Y-axis: G/R Ratio; SEM: std.error of mean
		Time (sec)	WT (2mM Ca2+ addition)			WT (0.2mM Ca2+ addition)
			Mean	SEM		Mean	SEM
		0	0.51332	0.014271		0.549696	0.014526
		3	0.528344	0.017389		0.558565	0.018467
		6	0.517004	0.009539		0.557147	0.017438
		9	0.509595	0.00906		0.526207	0.011802
		12	0.50886	0.008653		0.535805	0.015724
		15	0.50197	0.008713		0.521517	0.010751
		18	0.498165	0.00731		0.523242	0.012343
		21	0.513602	0.014413		0.527084	0.017891
		24	0.513054	0.010849		0.522814	0.01288
		27	0.506769	0.010504		0.521716	0.015692
		30	0.523347	0.013337		0.512618	0.010039
		33	0.531633	0.013276		0.529664	0.012152
		36	0.531176	0.011004		0.521605	0.015571
		39	0.535099	0.012479		0.553809	0.028618
		42	0.557629	0.015705		0.585555	0.028667
		45	0.563816	0.013206		0.618735	0.029983
		48	0.570837	0.01586		0.680013	0.035456
		51	0.62737	0.019206		0.752885	0.03882
		54	0.750491	0.034944		0.860163	0.044893
		57	0.884781	0.04368		0.959945	0.046322
		60	1.02644	0.046891		1.04819	0.046923
		63	1.11176	0.046727		1.09796	0.042662
		66	1.19015	0.04316		1.1425	0.040369
		69	1.24347	0.038609		1.16799	0.034865
		72	1.26977	0.036761		1.17126	0.032688
		75	1.2531	0.034448		1.1553	0.029746
		78	1.28233	0.031859		1.134	0.026704
		81	1.25727	0.029511		1.15586	0.026507
		84	1.2626	0.02733		1.10701	0.023985
		87	1.24851	0.026389		1.09756	0.024922
		90	1.21389	0.026048		1.0554	0.023446
		93	1.16386	0.025419		1.04503	0.023784
		96	1.12085	0.023813		1.01839	0.023423
		99	1.14789	0.025218		0.988376	0.021394
		102	1.12465	0.024196		0.962426	0.020035
		105	1.09135	0.024226		0.944059	0.020425
		108	1.094	0.023567		0.938854	0.01994
		111	1.07114	0.022188		0.922775	0.019539
		114	1.07306	0.022472		0.912211	0.019656
		117	1.02984	0.02108		0.909552	0.021567
		120	1.02111	0.023388		0.888108	0.020349
		123	0.998211	0.022122		0.85945	0.019182
		126	0.981303	0.021586		0.840246	0.018916
		129	0.955648	0.020606		0.840891	0.019264
		132	0.935227	0.021571		0.814917	0.018762
		135	0.939498	0.021027		0.79008	0.018721
		138	0.913842	0.019907		0.777566	0.017996
		141	0.887346	0.01975		0.774706	0.017787
		144	0.866094	0.020689		0.750439	0.017709
		147	0.859342	0.018952		0.746704	0.017229
		150	0.828847	0.019036		0.756627	0.01702
		153	0.839821	0.019279		0.746705	0.017331
		156	0.808161	0.019823		0.739615	0.017399
		159	0.795471	0.018938		0.742158	0.017849
		162	0.795847	0.018398		0.730929	0.017769
		165	0.781257	0.01934		0.722595	0.01732
		168	0.771952	0.017154		0.709915	0.016728
		171	0.76086	0.017849		0.681547	0.015783
		174	0.742761	0.017431		0.691308	0.015957
		177	0.732003	0.017155		0.677958	0.015556
		180	0.725718	0.017844		0.655954	0.014797
		183	0.729565	0.017538		0.666119	0.015371
		186	0.706064	0.016409		0.65505	0.016264
		189	0.692956	0.016284		0.643731	0.014539
		192	0.702726	0.015722		0.635384	0.014534
		195	0.68643	0.016064		0.617891	0.013858
		198	0.679358	0.016017		0.631275	0.01357
		201	0.66816	0.015066		0.611132	0.0128
		204	0.66523	0.014133		0.621306	0.0137
		207	0.643839	0.013342		0.618405	0.012392
		210	0.639281	0.013585		0.609459	0.012738
		213	0.63426	0.013362		0.608781	0.012364
		216	0.626528	0.01308		0.596655	0.011802
		219	0.624841	0.013267		0.581423	0.011686
		222	0.613466	0.012464		0.586046	0.011673
		225	0.611144	0.011993		0.578015	0.011556
		228	0.59999	0.011453		0.567539	0.011028
		231	0.599721	0.012332		0.568866	0.011235
		234	0.59816	0.011541		0.573518	0.0109
		237	0.600564	0.01098		0.568281	0.010283
		240	0.581831	0.011291		0.564472	0.010271
		243	0.578206	0.010394		0.557251	0.009616
		246	0.576042	0.010387		0.550036	0.009117
		249	0.574721	0.010604		0.550896	0.009717
		252	0.564547	0.009905		0.541984	0.008852
		255	0.54946	0.009667		0.541632	0.008877
		258	0.555662	0.009724		0.544764	0.00906
		261	0.554965	0.009234		0.548322	0.009085
		264	0.548052	0.009321		0.542486	0.008311
		267	0.550812	0.008496		0.54334	0.008723
		270	0.542267	0.008581		0.541058	0.008305
		273	0.538762	0.008514		0.536653	0.007752
		276	0.530426	0.008479		0.53578	0.007738
		279	0.52638	0.00823		0.525343	0.007393
		282	0.526031	0.008605		0.526121	0.007452
		285	0.519092	0.007757		0.527106	0.007271
		288	0.519495	0.007849		0.529536	0.007308
		291	0.514151	0.007639		0.521066	0.006766
		294	0.507186	0.008117		0.523814	0.00669
		297	0.503023	0.007058		0.523303	0.007086
		300	0.495732	0.007072		0.512638	0.006895
		303	0.502918	0.007554		0.512266	0.00656
		306	0.498816	0.006882		0.513767	0.006743
		309	0.497022	0.006903		0.511371	0.006869
		312	0.497678	0.007088		0.519062	0.007507
		315	0.484295	0.007204		0.510036	0.006802
		318	0.483291	0.006138		0.504857	0.007175
		321	0.478638	0.006278		0.482102	0.006374
		324	0.48252	0.007229		0.47961	0.006246
		327	0.479298	0.006704		0.493133	0.00653
		330	0.485442	0.00656		0.491697	0.006149
		333	0.534256	0.011481		1.84076	0.064964
		336	2.79106	0.128483		2.89199	0.084909
		339	4.22791	0.117148		3.12607	0.08116
		342	4.78148	0.110995		3.25249	0.080539
		345	4.90705	0.104754		3.32088	0.081648
		348	4.91413	0.105012		3.33811	0.080718
		351	4.91369	0.102332		3.40116	0.083788
		354	4.87223	0.099727		3.35077	0.082104
		357	4.82817	0.102689		3.35414	0.084733
		360	4.8349	0.103084		3.35549	0.083972
		363	4.86396	0.10554		3.35181	0.085537
		366	4.8104	0.099989		3.33268	0.083827
		369	4.829	0.10816		3.32265	0.085453
		372	4.80694	0.106926		3.35025	0.084845
		375	4.89829	0.110041		3.34517	0.086291
		378	4.88857	0.110576		3.34017	0.086428
		381	4.91175	0.117122		3.34895	0.086517
		384	4.87767	0.120363		3.31061	0.087354
		387	4.71418	0.112054		3.33788	0.086496
		390	4.77896	0.125214		3.35776	0.089132
		393	4.75232	0.121039		3.34255	0.089347
		396	4.71753	0.123605		3.32607	0.089809
		399	4.7239	0.123526		3.36143	0.091465
		402	4.72839	0.123809		3.32345	0.089829
		405	4.65578	0.123429		3.32667	0.091443
		408	4.64455	0.123275		3.31375	0.091603
		411	4.62947	0.122909		3.3496	0.09341
		414	4.64095	0.125333		3.30629	0.093295
		417	4.62065	0.128423		3.33103	0.094787
		420	4.61171	0.127123		3.34239	0.095121
		423	4.63321	0.129395		3.3051	0.092713
		426	4.45753	0.127014		3.38408	0.097433
		429	4.44884	0.124967		3.42864	0.100542
		432	4.44371	0.124184		3.35207	0.096901
		435	4.42199	0.125793		3.40585	0.099283
		438	4.48951	0.129072		3.47159	0.10206
		441	4.47153	0.126134		3.43222	0.100779
		444	4.45261	0.130553		3.3986	0.099609
		447	4.40964	0.12966		3.40634	0.100029
		450	4.43757	0.130125		3.40629	0.099468
		453	4.36786	0.127942		3.39527	0.099988
		456	4.4112	0.13184		3.42015	0.099631
		459	4.45212	0.136362		3.37601	0.096442
		462	4.41085	0.133675		3.48819	0.100154
		465	4.3295	0.129501		3.45856	0.100656
		468	4.42545	0.135393		3.42927	0.100414
		471	4.37951	0.135271		3.45489	0.100279
		474	4.31014	0.133212		3.44	0.100623
		477	4.31361	0.135062		3.42844	0.101502
		480	4.28259	0.134716		3.3861	0.101461
		483	4.3072	0.135133		3.30195	0.095664
		486	4.30595	0.138373		3.28039	0.098247
		489	4.26554	0.136328		3.3004	0.094886
		492	4.17222	0.135217		3.22885	0.097405
		495	4.21659	0.138243		3.21126	0.096841
		498	4.25342	0.142245
		501	4.20409	0.142587

## Sheet: Figure 6C
			Average trace:								Average trace:
		X-axis: Time (sec), Y-axis: G/R Ratio; SEM: std.error of mean								X-axis: Time (sec), Y-axis: G/R Ratio; SEM: std.error of mean
		Time (sec)	WT (2mM Ca2+ addition)			WT (0.2mM Ca2+ addition)				Time (sec)	TREM2 KO (2mM Ca2+ addition)			TREM2 KO (0.2mM Ca2+ addition)
			Mean	SEM		Mean	SEM				Mean	SEM		Mean	SEM
		0	0.612194	0.032632		0.570628	0.011529			0	0.51332	0.014271		0.549696	0.014526
		3	0.565921	0.026455		0.598612	0.011625			3	0.528344	0.017389		0.558565	0.018467
		6	0.585981	0.033477		0.584566	0.010885			6	0.517004	0.009539		0.557147	0.017438
		9	0.567311	0.023104		0.602151	0.012764			9	0.509595	0.00906		0.526207	0.011802
		12	0.58119	0.024687		0.595781	0.015111			12	0.50886	0.008653		0.535805	0.015724
		15	0.565763	0.022692		0.618956	0.024653			15	0.50197	0.008713		0.521517	0.010751
		18	0.546752	0.020644		0.600979	0.019217			18	0.498165	0.00731		0.523242	0.012343
		21	0.53781	0.019585		0.57639	0.011829			21	0.513602	0.014413		0.527084	0.017891
		24	0.562612	0.022678		0.58508	0.012964			24	0.513054	0.010849		0.522814	0.01288
		27	0.564056	0.025448		0.598553	0.013353			27	0.506769	0.010504		0.521716	0.015692
		30	0.579475	0.023364		0.606323	0.018956			30	0.523347	0.013337		0.512618	0.010039
		33	0.621776	0.024112		0.605911	0.026148			33	0.531633	0.013276		0.529664	0.012152
		36	0.610433	0.028731		0.595376	0.015488			36	0.531176	0.011004		0.521605	0.015571
		39	0.637547	0.028022		0.594905	0.018299			39	0.535099	0.012479		0.553809	0.028618
		42	0.670581	0.041452		0.594168	0.014554			42	0.557629	0.015705		0.585555	0.028667
		45	0.716034	0.04698		0.604471	0.01736			45	0.563816	0.013206		0.618735	0.029983
		48	0.784178	0.045921		0.621359	0.023395			48	0.570837	0.01586		0.680013	0.035456
		51	0.889381	0.059554		0.659597	0.029518			51	0.62737	0.019206		0.752885	0.03882
		54	0.946249	0.05132		0.666734	0.028999			54	0.750491	0.034944		0.860163	0.044893
		57	1.0525	0.046342		0.703747	0.033579			57	0.884781	0.04368		0.959945	0.046322
		60	1.10289	0.041586		0.778914	0.0436			60	1.02644	0.046891		1.04819	0.046923
		63	1.1775	0.038822		0.831181	0.047055			63	1.11176	0.046727		1.09796	0.042662
		66	1.22115	0.036425		0.867551	0.04535			66	1.19015	0.04316		1.1425	0.040369
		69	1.21984	0.032033		0.939504	0.048852			69	1.24347	0.038609		1.16799	0.034865
		72	1.18494	0.032478		0.987001	0.051204			72	1.26977	0.036761		1.17126	0.032688
		75	1.18826	0.033091		0.988895	0.046125			75	1.2531	0.034448		1.1553	0.029746
		78	1.16874	0.030226		1.05207	0.050811			78	1.28233	0.031859		1.134	0.026704
		81	1.15834	0.031319		1.06729	0.047411			81	1.25727	0.029511		1.15586	0.026507
		84	1.14881	0.036301		1.10291	0.04824			84	1.2626	0.02733		1.10701	0.023985
		87	1.14425	0.03294		1.08953	0.043863			87	1.24851	0.026389		1.09756	0.024922
		90	1.12943	0.033721		1.08818	0.045039			90	1.21389	0.026048		1.0554	0.023446
		93	1.07702	0.030692		1.14074	0.042989			93	1.16386	0.025419		1.04503	0.023784
		96	1.06305	0.035358		1.13627	0.038447			96	1.12085	0.023813		1.01839	0.023423
		99	1.01907	0.029773		1.16439	0.042564			99	1.14789	0.025218		0.988376	0.021394
		102	1.00142	0.029072		1.13949	0.037492			102	1.12465	0.024196		0.962426	0.020035
		105	0.998418	0.029841		1.09418	0.035267			105	1.09135	0.024226		0.944059	0.020425
		108	0.958537	0.029892		1.09676	0.035688			108	1.094	0.023567		0.938854	0.01994
		111	0.962613	0.029118		1.0887	0.03538			111	1.07114	0.022188		0.922775	0.019539
		114	0.938617	0.029052		1.07665	0.034677			114	1.07306	0.022472		0.912211	0.019656
		117	0.926606	0.029545		1.07761	0.035925			117	1.02984	0.02108		0.909552	0.021567
		120	0.904014	0.027373		1.05244	0.034226			120	1.02111	0.023388		0.888108	0.020349
		123	0.908758	0.030793		1.04351	0.031061			123	0.998211	0.022122		0.85945	0.019182
		126	0.889081	0.028054		1.03126	0.032657			126	0.981303	0.021586		0.840246	0.018916
		129	0.893695	0.030088		1.02862	0.031773			129	0.955648	0.020606		0.840891	0.019264
		132	0.895501	0.032557		1.00452	0.029423			132	0.935227	0.021571		0.814917	0.018762
		135	0.868366	0.028161		1.01278	0.030731			135	0.939498	0.021027		0.79008	0.018721
		138	0.889045	0.030955		0.985343	0.028708			138	0.913842	0.019907		0.777566	0.017996
		141	0.86002	0.027758		0.961891	0.028652			141	0.887346	0.01975		0.774706	0.017787
		144	0.86178	0.029893		0.965675	0.029175			144	0.866094	0.020689		0.750439	0.017709
		147	0.861272	0.032479		0.956785	0.028672			147	0.859342	0.018952		0.746704	0.017229
		150	0.852941	0.032131		0.946177	0.026793			150	0.828847	0.019036		0.756627	0.01702
		153	0.826862	0.026299		0.906682	0.025435			153	0.839821	0.019279		0.746705	0.017331
		156	0.806358	0.028149		0.888911	0.025463			156	0.808161	0.019823		0.739615	0.017399
		159	0.82159	0.030344		0.886508	0.025086			159	0.795471	0.018938		0.742158	0.017849
		162	0.785695	0.02951		0.898124	0.025759			162	0.795847	0.018398		0.730929	0.017769
		165	0.752393	0.024908		0.888944	0.023991			165	0.781257	0.01934		0.722595	0.01732
		168	0.760968	0.026751		0.878943	0.02318			168	0.771952	0.017154		0.709915	0.016728
		171	0.745743	0.027936		0.85668	0.023896			171	0.76086	0.017849		0.681547	0.015783
		174	0.735304	0.023323		0.847343	0.024437			174	0.742761	0.017431		0.691308	0.015957
		177	0.722316	0.028957		0.86004	0.024186			177	0.732003	0.017155		0.677958	0.015556
		180	0.705676	0.024411		0.850563	0.024649			180	0.725718	0.017844		0.655954	0.014797
		183	0.702576	0.022389		0.846651	0.023935			183	0.729565	0.017538		0.666119	0.015371
		186	0.71045	0.024364		0.820151	0.022683			186	0.706064	0.016409		0.65505	0.016264
		189	0.722786	0.028382		0.816634	0.021546			189	0.692956	0.016284		0.643731	0.014539
		192	0.716728	0.023579		0.785787	0.020687			192	0.702726	0.015722		0.635384	0.014534
		195	0.691637	0.023266		0.772771	0.020409			195	0.68643	0.016064		0.617891	0.013858
		198	0.680206	0.025967		0.763964	0.019021			198	0.679358	0.016017		0.631275	0.01357
		201	0.69379	0.023084		0.761472	0.019681			201	0.66816	0.015066		0.611132	0.0128
		204	0.660179	0.022547		0.771867	0.018693			204	0.66523	0.014133		0.621306	0.0137
		207	0.656474	0.023196		0.777278	0.020326			207	0.643839	0.013342		0.618405	0.012392
		210	0.668321	0.028278		0.760884	0.019875			210	0.639281	0.013585		0.609459	0.012738
		213	0.695961	0.029866		0.759933	0.019251			213	0.63426	0.013362		0.608781	0.012364
		216	0.6707	0.025243		0.747564	0.019934			216	0.626528	0.01308		0.596655	0.011802
		219	0.665456	0.027809		0.74326	0.018969			219	0.624841	0.013267		0.581423	0.011686
		222	0.676173	0.029752		0.741774	0.018332			222	0.613466	0.012464		0.586046	0.011673
		225	0.653952	0.023603		0.752326	0.019802			225	0.611144	0.011993		0.578015	0.011556
		228	0.672083	0.032477		0.751363	0.019907			228	0.59999	0.011453		0.567539	0.011028
		231	0.665386	0.023024		0.729485	0.018456			231	0.599721	0.012332		0.568866	0.011235
		234	0.663813	0.026091		0.724103	0.017959			234	0.59816	0.011541		0.573518	0.0109
		237	0.659776	0.027648		0.716008	0.017261			237	0.600564	0.01098		0.568281	0.010283
		240	0.650286	0.024265		0.710925	0.018233			240	0.581831	0.011291		0.564472	0.010271
		243	0.653827	0.023307		0.702543	0.0155			243	0.578206	0.010394		0.557251	0.009616
		246	0.668714	0.032622		0.687401	0.015626			246	0.576042	0.010387		0.550036	0.009117
		249	0.662723	0.027867		0.684328	0.015628			249	0.574721	0.010604		0.550896	0.009717
		252	0.646311	0.027093		0.680412	0.016058			252	0.564547	0.009905		0.541984	0.008852
		255	0.651565	0.032416		0.689203	0.018118			255	0.54946	0.009667		0.541632	0.008877
		258	0.645896	0.026413		0.681949	0.017469			258	0.555662	0.009724		0.544764	0.00906
		261	0.635244	0.024432		0.678813	0.01592			261	0.554965	0.009234		0.548322	0.009085
		264	0.637423	0.02778		0.671369	0.014095			264	0.548052	0.009321		0.542486	0.008311
		267	0.64221	0.027478		0.656085	0.013248			267	0.550812	0.008496		0.54334	0.008723
		270	0.626384	0.023828		0.6548	0.012964			270	0.542267	0.008581		0.541058	0.008305
		273	0.631332	0.026489		0.6567	0.013459			273	0.538762	0.008514		0.536653	0.007752
		276	0.632232	0.027209		0.649827	0.012958			276	0.530426	0.008479		0.53578	0.007738
		279	0.625384	0.022377		0.651996	0.013894			279	0.52638	0.00823		0.525343	0.007393
		282	0.634061	0.02793		0.653292	0.014481			282	0.526031	0.008605		0.526121	0.007452
		285	0.6288	0.024661		0.617821	0.012407			285	0.519092	0.007757		0.527106	0.007271
		288	0.63583	0.023865		0.612018	0.010715			288	0.519495	0.007849		0.529536	0.007308
		291	0.620078	0.026934		0.610699	0.012016			291	0.514151	0.007639		0.521066	0.006766
		294	0.618837	0.024979		0.613977	0.011861			294	0.507186	0.008117		0.523814	0.00669
		297	0.605924	0.022242		0.610632	0.011939			297	0.503023	0.007058		0.523303	0.007086
		300	0.602996	0.023922		0.610746	0.012502			300	0.495732	0.007072		0.512638	0.006895
		303	0.609346	0.025049		0.602565	0.010983			303	0.502918	0.007554		0.512266	0.00656
		306	0.604785	0.028273		0.635696	0.013422			306	0.498816	0.006882		0.513767	0.006743
		309	0.583385	0.023623		0.617265	0.012033			309	0.497022	0.006903		0.511371	0.006869
		312	0.587653	0.025788		0.608593	0.012804			312	0.497678	0.007088		0.519062	0.007507
		315	0.595355	0.022504		0.619065	0.013028			315	0.484295	0.007204		0.510036	0.006802
		318	0.591345	0.023533		0.606935	0.012193			318	0.483291	0.006138		0.504857	0.007175
		321	0.595642	0.024935		0.635696	0.013422			321	0.478638	0.006278		0.482102	0.006374
		324	0.577222	0.020451		0.617265	0.012033			324	0.48252	0.007229		0.47961	0.006246
		327	0.587402	0.022722		0.649827	0.012958			327	0.479298	0.006704		0.493133	0.00653
		330	0.584298	0.024467		0.651996	0.013894			330	0.485442	0.00656		0.491697	0.006149
		333	0.682448	0.039411		2.49782	0.10863			333	0.534256	0.011481		1.84076	0.064964
		336	3.384	0.215478		3.19863	0.121045			336	2.79106	0.128483		2.89199	0.084909
		339	4.47896	0.18219		3.30705	0.11688			339	4.22791	0.117148		3.12607	0.08116
		342	4.72886	0.146442		3.37828	0.11376			342	4.78148	0.110995		3.25249	0.080539
		345	4.93839	0.140717		3.55415	0.122036			345	4.90705	0.104754		3.32088	0.081648
		348	4.98169	0.141631		3.5799	0.118691			348	4.91413	0.105012		3.33811	0.080718
		351	4.97258	0.131397		3.63209	0.119538			351	4.91369	0.102332		3.40116	0.083788
		354	5.06893	0.14481		3.70854	0.120322			354	4.87223	0.099727		3.35077	0.082104
		357	5.03214	0.134482		3.66995	0.117549			357	4.82817	0.102689		3.35414	0.084733
		360	5.07338	0.143542		3.69192	0.114148			360	4.8349	0.103084		3.35549	0.083972
		363	5.01685	0.136937		3.73454	0.116901			363	4.86396	0.10554		3.35181	0.085537
		366	4.93526	0.127965		3.73156	0.117447			366	4.8104	0.099989		3.33268	0.083827
		369	4.91292	0.134039		3.73349	0.114915			369	4.829	0.10816		3.32265	0.085453
		372	4.981	0.139231		3.77872	0.122006			372	4.80694	0.106926		3.35025	0.084845
		375	4.89041	0.141029		3.76405	0.113457			375	4.89829	0.110041		3.34517	0.086291
		378	4.9582	0.139316		3.77749	0.116496			378	4.88857	0.110576		3.34017	0.086428
		381	4.8699	0.144584		3.81441	0.109816			381	4.91175	0.117122		3.34895	0.086517
		384	4.83473	0.145137		3.8857	0.117894			384	4.87767	0.120363		3.31061	0.087354
		387	4.88428	0.140556		3.96997	0.119851			387	4.71418	0.112054		3.33788	0.086496
		390	4.84996	0.14148		4.03042	0.121944			390	4.77896	0.125214		3.35776	0.089132
		393	4.94195	0.158451		4.00248	0.119417			393	4.75232	0.121039		3.34255	0.089347
		396	4.85402	0.151033		3.98503	0.12052			396	4.71753	0.123605		3.32607	0.089809
		399	4.73501	0.146973		3.98449	0.124594			399	4.7239	0.123526		3.36143	0.091465
		402	4.92864	0.164085		3.98943	0.121237			402	4.72839	0.123809		3.32345	0.089829
		405	4.89836	0.169496		4.05699	0.128971			405	4.65578	0.123429		3.32667	0.091443
		408	4.88997	0.170823		4.04147	0.128455			408	4.64455	0.123275		3.31375	0.091603
		411	4.88018	0.166228		3.97761	0.125864			411	4.62947	0.122909		3.3496	0.09341
		414	4.82059	0.167932		3.98766	0.128651			414	4.64095	0.125333		3.30629	0.093295
		417	4.8306	0.171901		3.82689	0.119377			417	4.62065	0.128423		3.33103	0.094787
		420	4.68508	0.161854		3.82229	0.119663			420	4.61171	0.127123		3.34239	0.095121
		423	4.68579	0.169563		3.84554	0.123488			423	4.63321	0.129395		3.3051	0.092713
		426	4.62942	0.172707		3.80634	0.116789			426	4.45753	0.127014		3.38408	0.097433
		429	4.54364	0.169614		3.7599	0.118024			429	4.44884	0.124967		3.42864	0.100542
		432	4.62316	0.184504		3.71446	0.117655			432	4.44371	0.124184		3.35207	0.096901
		435	4.50116	0.172835		3.7514	0.122886			435	4.42199	0.125793		3.40585	0.099283
		438	4.70563	0.193879		3.71693	0.116214			438	4.48951	0.129072		3.47159	0.10206
		441	4.52722	0.170485		3.68887	0.115375			441	4.47153	0.126134		3.43222	0.100779
		444	4.52302	0.176272		3.6798	0.123225			444	4.45261	0.130553		3.3986	0.099609
		447	4.67152	0.201469		3.65634	0.121713			447	4.40964	0.12966		3.40634	0.100029
		450	4.70867	0.199069		3.63757	0.11764			450	4.43757	0.130125		3.40629	0.099468
		453	4.64143	0.20462		3.65143	0.119995			453	4.36786	0.127942		3.39527	0.099988
		456	4.5334	0.185543		3.68297	0.127088			456	4.4112	0.13184		3.42015	0.099631
		459	4.44481	0.184704		3.63696	0.11948			459	4.45212	0.136362		3.37601	0.096442
		462	4.38341	0.187046		3.69626	0.129101			462	4.41085	0.133675		3.48819	0.100154
		465	4.37143	0.187084		3.74466	0.129667			465	4.3295	0.129501		3.45856	0.100656
		468	4.34765	0.192616		3.75084	0.132174			468	4.42545	0.135393		3.42927	0.100414
		471	4.35356	0.192796		3.70151	0.129442			471	4.37951	0.135271		3.45489	0.100279
		474	4.27012	0.189383		3.67703	0.12971			474	4.31014	0.133212		3.44	0.100623
		477	4.23991	0.191244		3.68757	0.128971			477	4.31361	0.135062		3.42844	0.101502
		480	4.0637	0.184395		3.64227	0.133405			480	4.28259	0.134716		3.3861	0.101461
		483	4.16706	0.1924		3.64757	0.129983			483	4.3072	0.135133		3.30195	0.095664
		486	4.24141	0.197365		3.61667	0.126931			486	4.30595	0.138373		3.28039	0.098247
		489	4.1761	0.189794		3.57822	0.129144			489	4.26554	0.136328		3.3004	0.094886
		492	4.10205	0.193058		3.55874	0.127753			492	4.17222	0.135217		3.22885	0.097405
		570	3.5168	0.263594		3.06122	0.105432			570	4.09719	0.152951		2.72325	0.120849
		720	2.68418	0.271985		2.20402	0.096521			720	3.72675	0.166899		1.94308	0.083282
		870	2.59824	0.297776		1.45106	0.069015			870	3.21353	0.163669		1.55701	0.064085
		1020	2.25358	0.260047		1.10979	0.047269			1020	2.89845	0.15965		1.44489	0.066318
		1170	2.04841	0.238852		0.923834	0.036705			1170	2.68409	0.158831		1.28082	0.056333
		1320	2.04899	0.226128		0.795062	0.031592			1320	2.52656	0.150218		1.13861	0.045918
		1470	1.86574	0.185359		0.695249	0.025055			1470	2.21152	0.137778		1.09918	0.044258
		1620	1.87179	0.21466		0.627805	0.016623			1620	2.16432	0.132115		1.01192	0.03956
		1770	1.88661	0.222415		0.576423	0.010148			1770	2.11514	0.131496		0.935606	0.040222
		1920	1.89889	0.211985		0.536554	0.007049			1920	1.96702	0.128426		0.868366	0.035588

## Sheet: Figure 6D
Calcium					Speed					Displacement					Straightness
4_WT_0.2Ca_TG	3_KO_0.2Ca_TG	2_WT_2Ca_TG	1_KO_2Ca_TG		4_WT_0.2Ca_TG	3_KO_0.2Ca_TG	2_WT_2Ca_TG	1_KO_2Ca_TG		4_WT_0.2Ca_TG	3_KO_0.2Ca_TG	2_WT_2Ca_TG	1_KO_2Ca_TG		4_WT_0.2Ca_TG	3_KO_0.2Ca_TG	2_WT_2Ca_TG	1_KO_2Ca_TG
										6.74758	0.265813	4.49685	9.09797
1.26318	0.406559	3.10087			2.4		6.6	1.8		3.55248	126.653	3.7876	1.49005		0.13	0.1	0.01	0.05
1.77628	2.99206	2.56705	3.30516		7.2	15.6	9.6	7.2		1.5642	4.77665	0.331174	3.41642		0.09	0.12	0.05	0.12
1.79698	1.97951	2.46947	3.10544		6	10.8	4.8	3		1.74635	1.38794	6.36721	1.9671		0.06	0.01	0.08	0.05
3.10305	3.69638	1.53641	2.4684		2.4	3.6	5.4	5.4		2.16812	1.0885	0.837704	28.4647		0.06	0.18	0.3	0.06
3.23763	2.75191	3.04813	4.71496		6	4.2	4.8	4.8		1.84893	1.07083	0.376643	43.7092		0.03	0.17	0.06	0.04
3.44761	2.56138	2.32968	2.96966		10.2	4.8	7.8	6		19.1975	1.05721	1.49119	3.7329		0.02	0.19	0.09	0.45
1.60682	2.1988	2.53301	2.95155		4.2	4.8	4.2	7.2		16.5948	20.0147	12.042	7.95928		0.05	0.41	0.36	0.59
1.49825	1.96617	2.1628	2.77139		15.6	3	1.8	9		9.56547	14.7855	1.01981	4.57568		0.12	0.3	0.09	0.04
1.87186	2.38887	1.15838	2.92211		16.8	9.6	3			27.1233	0.618497	35.4162	4.31883		0.1	0.15	0.07	0.06
1.57565	1.77186	4.10306	3.57693		4.2	7.8	21	4.2		5.21115	8.06392	8.29961	19.2907		0.24	0.12	0.01	0.1
1.59171	2.51377	2.75226	1.80438		7.2	7.2	13.8	6.6		0.957459	1.30965	4.46256	2.15354		0.39	0.17	0.07	0.07
1.68963	1.47471	1.00896	4.54965		11.4	4.8	4.2	18.6		6.19827	8.74243	1.88169	3.17099		0.05	0.11	0.37	0.1
3.41588	2.07311	1.30806	1.75508		2.4	4.8	15.6	2.4		3.89348	3.89363	0.988454	1.86132		0.04	0.28	0.04	0.09
2.91774	3.94914	2.56018	1.3624		8.4	3	4.8	1.8		2.54999	3.44602	31.2346	1.97656		0.07	0.05	0.14	0.16
2.752	3.26616	2.20703	4.54892		5.4	10.2	5.4	10.8		0.819413	16.2915	1.06903	12.1207		0.07	0.05	0.18	0.02
1.83474	3.54453	2.57179	3.2993		6	5.4	4.2	2.4		3.40251	11.9277	3.57388	13.9358		0.04	0.11	0.35	0.08
3.09516	1.75416	1.91171	5.32233		1.8	6	10.8	4.2		8.36177	1.21518	0.397813	10.2443		0.05	0.21	0.16	0.28
2.59263	2.74962	0.890754	3.99891		3.6	2.4	1.8			0.463429	33.2562	15.6389	6.80655		0.09	0.06	0.07	0.08
1.39047	1.08643	1.6229	2.05379		3	9	4.2	3		4.65869	6.00942	10.9623	25.7565		0.28	0.46	0.24	0.32
3.37405	1.73032	1.67132	2.74105		1.8	2.4	2.4	10.2		5.47735	0.817083	4.07583	13.1498		0.02	0.06	0.01	0.07
2.71616	2.64805	2.87347	3.68942		3	6.6	2.4	9.6		9.5274	0.91477	0.62617	1.69243		0.15	0.08	0.05	0.26
2.93665	1.93787	3.26499	0.940315		10.8	13.2	5.4	6		3.59584	1.34468	2.06133	12.8666		0.05	0.1	0.04	0.23
2.89541	1.71814	1.74156	1.79117		6.6	5.4	4.2	6.6		5.73375	13.3846	2.10066	6.02667		0.15	0.19	0.14	0.03
1.92928	2.48965	1.89276	3.12379		10.2	3.6	2.4	8.4		17.5811	0.951013	7.00619	6.77077		0.03	0.14	0.08	0.15
2.74231	2.41149	2.39836	2.61571		2.4	1.8	3			1.77668	1.40482	3.35303	3.15487		0.23	0.06	0.1	0.04
1.35837	0.942072	2.61309	1.44705		6	15	1.8	11.4		5.53431	0.763965	4.1386	9.784		0.3	0.14	0.05	0.06
2.62803	3.04553	2.41796	3.33739		1.2	8.4	3	5.4		0.747232	2.31304	1.04422	6.64627		0.14	0.06	0.06	0.06
1.38412	1.22529	1.83143	4.26531		5.4	3.6	4.8	5.4		0.6984	9.78249	0.442604	9.90738		0.1	0.44	0.13	0.18
3.1119	2.42395	4.43017	3.88944		2.4	4.8	9	4.2		0.563743	1.32376	47.0576	19.5892		0.03	0.05	0.03	0.16
2.52153	2.34254	2.18849	4.17806		1.8	8.4	5.4	6		8.1605	0.460864	2.51339	3.1846		0.04	0.16	0.37	0.17
3.45567	2.01662	4.22358	2.25885		1.8	7.2	19.8	3.6		8.93994	0.665705	10.0483	2.0174		0.03	0.05	0.04	0.51
1.96481	1.6722	1.50676	2.74965		3	7.8	3			3.46796	9.5859	14.8897	8.58191		0.25	0.26	0.07	0.02
1.72666	2.65183	2.85283	4.58394		5.4	9.6	3	4.2		0.49637	0.517072	7.65126	9.83365		0.16	0.27	0.05	0.05
3.72981	1.89319	4.05896	2.8712		12	18	15.6	10.2		2.92938	4.8877	2.52456	3.61366		0.03	0.25	0	0.09
2.67944	2.83276	3.05321	1.80353		1.8	6.6	4.8	9.6		4.24788	5.04486	2.73651	24.9545		0.03	0.23	0.01	0.1
1.99814	1.86621	1.88968	3.65093		6.6	4.8	4.8			2.76991	5.91487	2.82339	6.79799		0.04	0.04	0.16	0.03
1.85543	2.23469	1.57071	4.71539		3	8.4	9.6	7.8		4.13566	1.09343	1.30789	9.51325		0.15	0.2	0.1	0.33
2.59836	2.16738	1.38075	2.68807		9	12.6	1.8	10.2		2.08817	1.31743	3.38992	16.3767		0.03	0.05	0.07	0.07
2.62015	1.90559	4.00323	3.72848		1.8	15.6	9.6	3.6		2.20767	0.9798	2.75029	12.2792		0.2	0.05	0.06	0.28
3.67161	2.45029	1.4465	3.91378		1.8	9	3.6	7.2		8.66356	2.00498	49.4343	11.5491		0.11	0.07	0.04	0.24
2.23699	1.78492	3.80186	2.67069		3	15	1.8			1.06962	0.636346	0.699599	5.49345		0.07	0.18	0.03	0.07
2.7066	2.67554	3.04889	1.85015		4.8	6	2.4			14.0799	2.13252	3.1371	7.37524		0.19	0.06	0.01	0.08
2.0614	1.80791	1.23906	1.5216		3	5.4	3.6	1.8		3.77343	1.64478	9.51893	8.6593		0.03	0.38	0.34	0.35
1.75476	3.49887	1.8881	1.40697		4.2	7.2	2.4	4.2		15.1924	2.68077	3.21555	4.61085		0.33	0.11	0.07	0.16
3.67708	2.05238	2.30902	3.99282		2.4	9.6	6.6	4.8		26.5512	8.82927	8.70135	5.68937		0.15	0.03	0.05	0.19
1.62715	2.84184	3.67194	3.21984		4.2	9	1.8	4.8		18.0526	1.38112	55.648	10.5668		0.35	0.06	0.03	0.1
1.88319	1.5576	0.583471	1.31271		15.6	5.4	4.8	4.8		9.15212	2.66017	0.982749	7.2154		0.17	0.18	0.18	0.11
2.52936	1.29436	3.54332	4.55566		10.2	12	6	6.6		0.953753	7.91376	0.489886	1.15106		0.18	0.21	0.03	0.16
3.33632	1.51477	3.39249	4.29342		4.8	4.8	4.8	3		11.3715	1.20099	10.1949	13.0779		0.18	0.25	0.12	0.23
2.7119	1.22169	2.18138	4.09936		1.8	3	4.2	1.8		2.03964	14.0985	9.30395	1.04619		0.06	0.17	0.07	0.06
2.80432	1.4742	4.4504	3.76254		3.6	21	3	3.6		3.52825	0.58995	0.673036	4.33763		0.31	0.04	0.05	0.36
2.21526	1.25206	1.1319	1.84435		1.8	16.2	5.4	1.8		2.92109	1.32163	1.58335	0.614026		0.11	0.1	0.08	0.06
2.43033	2.17066	2.77094	3.93351		13.8	7.2	2.4	22.2		0.533037	0.763025	3.7416	5.512		0.03	0.12	0.18	0.02
2.59015	2.10216	2.42149	2.31506		3.6	4.8	22.2	3.6		7.51912	1.2892	0.950153	14.0523		0.08	0.15	0.04	0.02
1.70079	2.24016	2.33227	1.92346		2.4	11.4	6	4.2		1.92587	3.41973	5.56006	3.64882		0.02	0.13	0.02	0.12
2.78756	1.88088	1.4933	4.25185		9.6	4.8	3.6	7.2		1.36536	0.866034	7.04818	17.3669		0.08	0.15	0.17	0.2
2.38965	1.32658	3.00391	2.97989		2.4	6.6	3	3.6		5.36539	9.24165	1.15693	2.29512		0.08	0.13	0.05	0.1
2.53732	2.14431	2.252	2.02458		2.4	4.2	3	6.6		5.49364	4.16575	4.24463	2.3321		0.06	0.24	0.24	0.26
2.07971	2.32842	2.40314	4.06448		2.4	5.4	12.6	4.2		6.51739	1.23264	1.88504	1.88638		0.22	0.01	0.1	0.05
1.41111	1.93455	0.991217	3.40057		7.8	7.8	6.6	3.6		6.89011	1.23163	0.533663	0.812036		0.07	0.24	0.2	0.06
2.84236	1.33255	2.42325	3.26281		7.8	7.8	9	8.4		6.46647	1.67459	0.679719	4.70971		0.09	0.52	0.08	0.02
3.39059	1.479	2.01262	4.05881		23.4	6.6	10.8	2.4		3.52743	5.07763	71.2182	4.32125		0.03	0.17	0.18	0.04
1.58262	1.79107	0.868359	3.94552		5.4	3	3	8.4		1.20713	1.33471	0.547755	19.0266		0.12	0.26	0.71	0.06
2.8154	2.79799	1.55493	2.56442		9.6	6	3.6	9.6		2.16872	0.551345	1.91406	10.2809		0.04	0.03	0.03	0.04
2.10325	1.76841	1.73848	4.42918		12	6	7.2	9.6		14.0737	0.531753	277.579	1.67091		0.01	0.52	0.14	0.2
2.32111	1.08955	1.22998	3.77302		10.8	10.8	11.4			2.67102	7.60647	0.688382	1.79615		0.02	0.4	0.08	0.09
3.60196	1.89689	1.96269	2.99767		4.2	7.8	7.8	7.2		3.67746	41.8554	2.40076	10.3133		0.36	0.21	0.05	0.02
2.1309	1.75212	4.1139	4.4938		12	8.4	3			4.3163	4.76259	1.35939	4.35023		0.02	0.01	0.7	0.01
1.55631	1.56985	1.95585	4.32961		2.4	7.2	1.2	2.4		2.78816	1.11446	10.2406	13.4261		0.14	0.04	0.45	0.41
1.61786	1.85103	2.31297	4.1991		4.2	4.8	8.4			6.09471	8.99557	6.25898	6.41848		0.1	0.09	0.26	0.04
3.78693	2.01871	2.69682	0.577518		3	9	9	5.4		27.4723	0.535077	3.85019	2.17616		0.1	0.16	0.03	0.26
3.24632	1.95809	2.00078	1.8346		4.8	1.8	7.2	14.4		9.89632	0.80032	0.485332	8.3518		0.13	0.04	0.09	0.04
1.80084	1.27759	2.41907	3.77391		14.4	6.6	11.4	4.2		12.1405	1.73262		11.1622		0.19	0.16	0.03	0.06
2.37185	1.71271	2.45924	4.0801		8.4	10.8	13.8	2.4		2.50059	5.13736		8.70066		0.12	0.24	0.14	0.31
1.35669	4.03893	2.11096	1.29496		4.8	4.8		12		3.75294	0.307193		1.12598		0.24	0.21		0.09
2.78971	1.01456	1.88446	4.11719		3	12		6.6		7.32101	0.862405		5.66597		0.09	0.61		0.14
3.00091	1.71417	2.03603	2.23496		3.6	3		6.6		14.345	1.57201		2.80728		0.1	0.27		0.02
2.11171	3.02501	2.93289	4.39345		4.2	4.2		14.4		4.58806	39.0895		5.40836		0.18	0.33		0.04
1.00887	2.21026	1.80638	4.1586		10.2	7.2		1.8		2.02188	0.359082		1.27405		0.14	0.08		0.15
2.00996	2.94435	3.16726	3.24693		4.2	6.6		3		3.39228	5.931		0.414328		0.11	0.14		0.18
2.11787	2.196	2.89673	3.55431		4.8	8.4		1.8		6.69049	3.0005		17.9319		0.04	0.27		0.06
2.5146	3.23246	1.77266	4.24928		6			2.4		22.0792	1.64329		13.1882		0.06	0.04		0.02
2.11155	2.02323	4.13099	4.51679		3	3		10.2		12.3439	1.2833		3.39168		0.21	0.77		0.18
2.15949	3.075	1.40162	3.17222		10.8			5.4		1.26571	1.36914		10.9998		0.2	0.07		0.26
3.06677	2.5824	3.71403	1.35779		4.2	6				14.6211	5.71159		9.33278		0.3	0.29		0.03
2.52752	1.08607	3.07132	4.31674		5.4	10.2		5.4		12.8174	0.784983		3.48779		0.02	0.35		0.2
2.00271	1.46635	4.21534	1.58535		8.4	7.2		5.4		17.4592	0.591195		4.01226		0.18	0.37		0.18
1.40952	2.0779	1.51852	2.77842		5.4	5.4		4.2		1.31046	0.260563		11.9362		0.24	0.34		0.09
1.99547	1.88263	2.71712	2.97854		8.4	10.8		4.2		0.89357	1.42798		1.66199		0.2	0.16		0.1
1.34278	2.08961	4.17747	1.95943		1.2	4.8		10.8		5.59993	2.9535		5.88334		0.09	0.22		0.11
1.83068	2.67196	2.0764	2.93462		1.8	4.8		5.4		1.13856	0.23958		6.45889		0.05	0.16		0.03
1.88755	1.73454	2.12472	4.01263		2.4	7.8		5.4		19.91	0.639111		9.89773		0.25	0.63		0.11
3.29248	2.5976	1.74146	3.06986		10.2			7.2		70.9685	8.68229		9.82343		0.01	0.22		0.09
3.34694	0.421777	1.54187	4.32947		18.6	7.8		11.4		22.3588	0.073035		2.99539		0.11	0.17		0.08
3.28976	2.20443	1.21916	3.97074		15	9		10.2		1.57012	1.20252		10.3921		0.47	0.26		0.1
2.95113	3.8029	3.80302	2.17471		9.6	16.8		3		5.231	0.473781		13.0589		0.23	0.12		0.09
1.49841	2.59737	4.32562	4.49644		1.8	6		3		21.8308	18.203		2.91861		0.09	0.16		0.32
1.58492	2.2644	1.08578	3.51342		1.2	13.2		11.4		13.1201	0.815276		9.5451		0.47	0.34		0.11
1.80417	2.01572	1.15353	3.95179		7.2			7.2		9.22639	13.4009		8.00888		0.31	0.11		0.04
1.64357	2.02203	1.72079	1.04319		8.4	15.6		6		2.35445	62.4318		17.1519		0.15	0.2		0.16
1.57854	1.76508	3.81738	4.15266		9.6	13.8		11.4		24.7758	1.25511		1.52946		0.1	0.17		0.07
1.40769	1.39079	0.686168	3.71451		8.4	5.4		7.2		2.69663	1.84277		3.16868		0.03	0.03		0.24
1.70758	2.18183	3.91656	3.1512		17.4	9.6		3.6		15.3331	1.37893		1.62261		0.14	0.08		0.04
3.65028	2.37362	3.2194	4.30731		5.4	12		7.8		4.87049	1.81824		9.83779		0.05	0.27		0.04
2.81357	1.41628	2.04976	2.93389		14.4	7.8		3		5.51151	0.775871		3.84058		0.11	0.34		0.05
2.79244	1.93747	1.97091	4.91562		3	7.2		9		18.5722	0.574717		4.29053		0.16	0.1		0.11
1.88745	3.15624	2.92153	3.42522		14.4	9.6		9.6		1.15564	0.620653		6.2515		0.04	0.18		0.04
3.11821	4.07887	2.47933	2.82198		13.2	12.6		15.6		11.5537	2.48509		15.2009		0.14	0.56		0.03
2.65166	3.51886	2.39358	2.44341		6	8.4		15.6		8.61413	4.84945		7.73158		0.02	0.13		0.04
1.42642	2.57197	2.74387	4.03608		21.6	8.4		9.6		1.02858	2.01877		9.3839		0.05	0.12		0.16
3.39635	1.00877	1.36455	1.08492		4.8	8.4		5.4		20.7673	0.919813		16.0011		0.18	0.33		0.15
2.52398	1.48065	2.16344	4.00886		3	3.6				9.84806	2.3429		9.30653		0.04	0.26		0.05
2.9147	1.88505	1.82747	2.69381		12.6	15.6		10.2		40.1788	4.05688		2.90497		0.16	0.16		0.16
2.83446	1.7495	4.27935	1.61104		6.6	8.4		3		0.920607	0.510417		5.60599		0.15	0.19		0.32
2.73213	2.37382	1.06402	4.49307		33.6	7.8		14.4		44.9357	1.2105		3.17839		0.12	0.02		0.02
1.89852	2.34703	2.35655	3.63738		14.4	15.6		3.6		25.0236	2.92372		42.8851		0.01	0.1		0.15
1.30415	0.905248	2.02139	4.03885		9.6	14.4		6		4.73612	2.59651		10.5607		0.48	0.34		0.05
2.65355	2.84732	1.7782	4.15011		7.2	4.2		9		2.38354	8.22323		3.39852		0.35	0.15		0.47
3.82024	1.17877	2.13048	4.78487		2.4	5.4		8.4		2.82717	79.2388		62.2238		0.21	0.1		0.12
3.03162	1.65548	0.842261	2.83001		3.6	13.2		12		6.50787	4.37556		2.38829		0.07	0.01		0.03
2.52359	2.06458	1.47517	2.87779		6.6			9		22.9674	1.85808		17.7139		0.04	0.11		0.7
3.46374	1.79886	1.63209	2.59648		19.2			3.6		55.6061	1.1924		31.7462		0.03	0.09		0.07
1.87222	1.51095	1.11357	2.97921		12.6	10.2		6		10.4329	83.2734		8.14546		0.18	0.05		0.28
1.59381	2.5433	3.09333	1.79161		6.6	13.8		10.8			0.411928		4.33499		0.86	0.15		0.29
3.63035	1.82093	1.96445	4.25499		7.8	4.8		11.4			5.31165		9.18749		0.14	0.06		0.07
2.67441	2.6139	2.19642	4.47249			18		15.6			2.46284		3.02729			0.22		0.03
2.43344	1.48757	2.55501	1.70389			16.8		5.4			3.588		6.56656			0.08		0.16
1.97576	1.92232	2.44509	1.29059			21		2.4			0.701805		38.0419			0.05		0.12
1.85153	2.05982	2.47934	4.44602			12.6		4.8			2.15105		6.01662			0.2		0.14
2.47055	1.93647	1.95752	3.42856			14.4		22.8			5.79035		3.98002			0.23		0.17
2.63189	2.26548	2.87439	2.83918			7.8		5.4			3.82593		4.04719			0.1		0.12
4.01234	1.70221	1.8715	0.974797			13.2		3.6			0.709681		4.94405			0.18		0.1
2.25728	2.47171	3.00608	3.73698			2.4					2.89875		1.48669			0.15		0.02
2.53861	3.2216	1.82557	1.74238			15.6		2.4			8.44458		12.2652			0.18		0.2
2.03945	2.84575	4.29107	2.98313			4.2		20.4			2.22298		19.9588			0.18		0.01
1.63498	1.48343	3.62334	2.34179			24.6		18			2.4779		1.49183			0.05		0.07
1.69821	1.23464	4.24863	1.48513			7.2		7.8			1.71166		2.36363			0.47		0.27
1.8179	1.38518	1.40935	2.91488					7.2			4.14891		4.73018			0.32		0.02
2.63029	1.38745	2.93724	2.93126			10.8		3.6			2.082		15.8728			0.27		0.07
3.54133	0.580979	4.28168	3.23197			6		10.8			3.47024		17.9108			0.44		0.04
2.84154	2.01917	1.69332	2.6008			9		5.4			0.285399		12.379			0.18		0.3
2.76187	1.9953	1.41933	2.24302			18.6		9.6			0.751721		7.01628			0.04		0.18
2.24988	1.76049	1.30596	4.14891			13.8		11.4			0.636256		8.20538			0.36		0.11
2.50841	1.77434	3.82329	4.13775			15.6		4.8			5.416		35.1749			0.23		0.14
2.55073	1.17393	1.41138	2.43934			14.4		21.6			0.55773		6.16783			0.32		0.04
1.78389	1.93948	1.09568	2.83768			6		7.8			8.288		5.3555			0.06		0.44
2.27395	2.34315	1.15715	1.72841			6.6		4.2			0.242368		7.56612			0.25		0.15
2.51193	1.79821	1.61741	3.59635			13.2		21.6			0.849912		14.2437			0.15		0.02
2.0697	1.25262	2.0802	2.50047			9		4.8			2.99078		7.655			0.62		0.15
1.30585	1.40673	3.6001	4.97042					10.8			0.867265		9.86163			0.3		0.13
2.71996	1.78342	2.60044	3.66695			14.4					1.94088		7.35448			0.13		0.06
3.21944	2.68032	3.81549	3.96235			12		2.4			1.60128		11.5315			0.22		0.41
2.88915	1.87603	2.1009	1.99411			16.8		1.8			1.31536		10.308			0.16		0.41
2.14005	1.65303	4.34751	1.30249					10.8			1.57214		9.6864			0.32		0.11
2.40972	1.097	2.71781	1.44455			15.6		9.6			4.42559		23.542			0.28		0.11
3.53621	1.79338	2.22064	3.82603			29.4		9.6			32.1059		6.22471			0.15		0.1
2.13342	1.60314	2.3393	3.06018			19.8							15.3868			0.05		0.11
1.48546	1.25329	1.43207	1.30409			17.4		7.8					3.11576			0.1		0.08
1.74178	1.71236	2.89643	4.08484										3.72566					0.06
4.15711	1.7742	2.1191	4.12327					2.4					9.1322					0.12
3.13223	1.94434	2.19015	3.87985					2.4					10.9369					0.14
1.76272	1.19357	4.31428	1.76867					7.8					15.4138					0.12
2.51446	2.10369	0.976706	3.74102					3					14.8038					0.35
1.25656	1.58325	2.2918	4.23095					12.6					8.69881					0.12
3.07623	0.881889	1.88963	4.06681					22.8					5.86359					0.07
3.03777	2.49078	1.87868	4.01918					17.4					18.136					0.05
2.10899	3.98453	1.72097	4.22528					18.6					8.39766					0.03
0.998216	1.8529	0.786184	2.58503					19.8					19.2732					0.09
1.99787	3.04537	1.42747	1.88711					7.8					32.1746					0.11
2.07048	1.76443	1.64992	4.06697										47.7829					0.08
1.48713	2.24972	1.02933	3.5233										4.06981					0.11
2.51452	2.14885	1.89266	3.83872					16.8					16.0306					0.29
2.06613	2.87917	3.07024	3.3328					18.6					30.8587					0.02
2.1385	1.90093	1.88793	3.84766					3					3.70301					0.51
3.14798	2.98609	2.08696	3.73779										37.9971					0.15
2.41619	2.56814	2.53354	2.53292					1.2										0.25
1.95204	1.00812	1.92008	1.85534					4.8										0.77
1.35979	1.59622	2.44968	4.27296
2.0096	2.07306	2.40979	3.35301
3.62393	1.82846	1.97737	2.95853
1.61644	2.06168	2.61924	4.49029
1.38361	2.36631	1.70968	4.22635
1.75502	0.412925	2.86838	3.93497
1.53051	2.15824	1.73717	0.583048
1.59428	3.59723	4.2659	1.76102
3.13148	2.58607	1.41098	3.36842
2.47033	2.29296	3.73034	1.96953
1.39136	1.97757	3.09724	2.73453
3.42095	1.84191	4.11737	1.41503
2.90676	1.78495	1.4242	1.34428
1.37874	1.3038	2.77725	4.12355
1.7406	2.23245	4.12089	2.2008
1.94219	2.62152	1.72934	4.43386
3.31541	1.35103	1.36604	4.20122
3.50791	1.98765	1.25654	3.02829
2.80905	3.73679	3.81301	3.51928
2.84013	3.14596	1.059	4.39047
2.56437	1.61231	1.0321	4.49506
1.28148	3.22472	1.65338	3.48707
2.6376	0.996827	1.97701	1.38163
1.34785	2.71692	3.57063	4.45777
1.63955	1.52699	0.691522	2.58197
3.58764	1.85824	3.18371	1.57863
2.71835	1.71829	3.27217	2.65936
2.70349	2.19883	2.01862	2.98297
1.93347	2.22173	4.32075	2.80258
3.69618	0.879132	2.97663	1.92169
2.6102	2.76821	2.25725	4.17715
2.90431	1.12196	2.41441	3.04884
2.54073	1.7105	1.34298	4.47285
2.25071	2.03168	2.8093	1.97708
3.69478	1.80075	2.10479	4.15136
2.64382	1.55663	2.26396	4.48592
2.14943	2.51747	2.40282	4.08046
1.72677	1.75263	1.95899	0.942904
3.71216	2.54904	1.67539	4.26604
2.89155	1.80738	1.25723	3.64908
2.56577	1.6747	1.9308	4.03867
3.34657	2.03488	4.22199	2.00859
1.77398	1.94756	1.0428	2.81579
1.70939	2.02044	2.41685	4.5645
2.65394	2.30009	2.40502	3.84297
3.48536	1.60133	2.08646	3.50218
2.72415	2.37306	2.02911	2.69358
2.77972	2.59151	0.81508	2.39981
2.26835	3.44389	1.34065	3.87074
2.35954	2.75472	2.689	1.13417
1.87108	1.22188	3.07773	3.89981
1.78458	1.35377	1.92617	2.70682
2.45518	1.58631	1.81183	1.33132
2.56725	1.38856	2.09191	4.23527
1.78279	1.14629	2.63919	3.92627
2.27367	2.08225	2.35067	3.83215
2.51685	1.60422	1.82129	3.46247
2.06825	1.69127	4.27246	3.38049
1.36446	1.1973	1.95615	2.56031
2.81159	1.89123	3.14278	1.57784
2.85295	1.72347	4.10646	2.94949
1.55499	2.27261	1.41532	3.03555
1.90744	1.25352	2.71977	3.31789
2.18431	1.43041	4.43088	2.57469
2.37562	1.63708	2.96726	4.72157
3.25894	1.84341	1.69915	2.90937
2.05797	2.93931	1.41797	2.84415
1.47143	1.62874	1.23223	2.73074
1.73204	1.05489	3.92176	2.91666
4.2807	1.79626	1.37938	1.66654
2.68786	1.53069	3.6851	4.26098
1.72051	1.20692	1.08655	4.62359
2.36771	1.67916	0.961318	1.77199
1.25844	1.94104	1.67606	1.30513
2.82184	1.84047	2.08896	4.36762
3.0386	1.14452	1.86331	3.30047
2.08427	2.09777	3.79251	4.52233
0.993886	0.87545	0.665476	3.61409
2.07003	2.57367	4.03029	4.13496
2.10785	3.83906	3.21204	2.04335
1.56269	1.64789	2.06469	2.83237
2.77177	1.83991	4.46234	3.73307
2.57345	3.0814	2.79466	0.885715
2.00849	2.10071	2.30393	1.61922
2.24107	2.09369	2.34203	2.93521
3.11717	2.82066	1.2639	4.03772
2.51573	1.97851	2.73768	4.31446
1.86243	2.4666	2.0672	3.68582
1.44207	0.98505	4.10764	2.29631
2.06598	1.63657	0.985399	3.90006
3.28852	1.93963	2.30581	2.58879
3.4322	1.7388	1.77427	4.55529
3.47191	2.04345	2.19622	2.72591
1.61081	1.58197	0.810202	1.79834
1.50799	3.35979	1.34445	3.99526
1.89748	2.51273	1.55097	2.53575
1.51064	0.974995	1.09653	3.68769
1.50042	1.60276	1.89011	2.52488
2.89287	2.52514	1.77632	1.89386
1.84337	2.10377	1.96727	1.418
3.18135	0.398225	2.46873	1.27289
2.4445	3.68149	2.27395	3.17791
3.19994	2.48304	2.41167	3.81058
1.34581	2.22602	1.84664	1.38382
2.79164	2.01092	1.78499	4.38919
1.27132	1.97272	1.9691	4.18018
1.57438	1.84523	2.78699	4.043
1.83014	1.42614	1.65987	1.78275
3.22972	2.81715	2.97443	3.63609
2.99141	1.13718	3.00996	3.28267
2.8965	2.16586	1.75367	1.81257
2.31892	2.60627	4.29956	4.19046
2.74933	1.38622	3.18533	3.03606
1.21955	2.05354	4.12079	1.88505
1.36707	3.90338	1.2679	3.88072
1.69242	3.13548	2.68814	3.37437
3.71804	1.43457	4.13567	3.17896
2.77286	2.54482	1.59667	3.94816
1.64347	1.68733	1.38056	4.09945
1.87761	2.49776	1.30332	4.61193
3.62807	1.63347	3.80473	2.54
2.63439	1.89578	1.32568	3.54501
2.48272	2.37295	3.66879	4.41231
2.9067	2.30261	0.996825	2.89763
2.15359	1.00734	1.01378	4.3874
3.79934	2.40409	1.56279	4.13763
2.6509	1.72427	2.18996	1.74361
2.11712	2.36356	2.00894	4.17022
1.6434	1.67289	3.66863	1.74301
3.56689	2.02335	0.634814	2.15655
2.75757	1.60465	3.74967	1.45235
2.53509	1.17426	3.12098	4.10431
3.44223	2.00143	2.01639	2.18375
2.83891	2.00629	4.23362	4.39731
3.42481	1.60363	1.74766	3.99641
2.56605	2.14939	2.55849	2.91749
2.73953	1.80838	2.39404	3.38671
2.22047	1.75255	2.29752	4.23922
2.16405	1.70345	1.31335	4.27747
1.87761	1.97351	2.75633	2.91781
2.42628	2.50303	1.96355	1.28586
1.7805	1.84275	2.38069	3.85141
2.61686	3.42251	3.98924	1.33512
2.45961	2.78675	0.947854	2.6157
1.67758	1.41128	1.24689	2.98275
2.23141	1.20889	2.26786	1.96327
2.31641	1.38683	2.33726	3.0606
2.04857	1.26675	1.95254	4.24624
1.35194	1.17741	1.70807	3.14327
2.63475	1.47383	0.770468	4.44687
3.21385	2.0716	1.29947	4.05729
1.66439	1.70923	1.65057	4.50361
1.73945	1.18295	1.18188	3.4963
2.2363	1.87227	3.07908	4.08928
2.40116	1.67618	1.75191	0.937054
3.59367	2.20457	1.90638	4.43315
2.08382	1.1516	2.34394	3.56343
1.40155	1.39021	2.27732	3.99813
1.59875	2.67914	2.19738	2.05918
4.23187	1.48984	1.82534	2.86883
1.66232	1.01269	2.60711	4.47706
2.51817	1.95765	1.71869	3.92225
1.19204	1.22761	2.87477	3.5359
2.50595	1.54286	1.71263	2.53564
2.9126	1.68216	4.44399	2.30317
2.14463	1.88425	1.43197	0.925677
0.949423	1.856	3.70798	3.78466
1.995	0.911629	3.19752	2.6181
2.11011	2.43703	4.11376	1.46485
1.53986	3.76855	1.22798	4.1722
2.76702	1.6146	2.58364	3.74749
2.52367	1.83078	4.16467	4.47176
1.93208	3.00515	1.89675	3.67695
2.14902	2.07412	1.88073	2.82243
3.09007	2.09587	1.69568	2.82592
2.47134	1.91835	1.36784	2.94904
2.04263	2.90738	1.19756	3.31892
1.37048	2.35341	3.79693	1.70054
2.03143	1.00608	4.35939	4.222
3.16349	1.70999	1.02175	4.4364
1.30514	1.92629	0.997962	1.67928
1.57874	1.73098	1.60635	1.27524
1.84863	1.9941	3.72451	4.62681
3.361	0.392019	0.605848	3.90008
3.29779	2.61709	3.9374	5.3497
3.40625	1.80027	3.22143	2.25495
1.59414	3.45513	2.00218	0.896882
1.28555	2.2391	1.81447	3.74977
1.88109	2.13646	2.60148	1.69599
1.49438	1.93896	2.20393	2.92614
1.59972	1.8935	2.45234	2.56975
1.5606	1.84288	1.33193	2.89599
3.36936	1.35363	2.7269	3.00109
2.81557	1.24806	1.93639	1.64961
2.72428	2.11418	2.02741	3.39803
2.00908	3.71927	2.42208	2.48393
2.92898	2.93338	0.952031	4.86933
2.53082	1.56635	1.13971	2.08107
1.39343	3.30877	2.28606	4.08174
3.11094	2.42309	1.86195	2.52329
2.7758	0.811276	1.68142	4.50154
2.8289	1.48815	0.732754	2.63531
2.80699	2.33382	1.25043	1.7353
2.0541	1.58052	1.55321	3.76297
2.77025	2.24931	1.11346	2.46157
1.19498	2.24586	4.25921	4.74626
2.48305	0.882196	2.8336	3.58133
1.3752	2.71469	1.74214	3.84551
2.67524	1.06845	1.92056	2.61902
2.4347	2.19945	2.20595	3.70212
3.44798	2.7964	2.17475	3.0328
1.83738	1.62065	2.11844	1.47628
1.48209	1.91352	2.31193	4.61028
3.86843	1.61692	1.78136	4.0933
2.56395	1.46378	2.67481	4.02575
1.92344	2.42374	1.58868	3.84538
1.79808	1.77953	2.65974	1.79133
2.39465	2.50465	1.68094	4.10019
2.40803	1.83659	4.22781	4.32549
2.9309	1.94044	1.40559	3.68088
1.93148	1.68888	3.58345	4.19234
3.8049	1.73545	4.19075	3.72085
2.6129	1.6792	1.30774	3.12694
2.15046	2.42769	2.74843	3.95821
1.78221	2.29039	4.24223	3.91503
3.53921	2.56935	1.91529	3.69319
1.76128	1.1249	1.63555	1.87615
2.80669	1.34225	1.33406	2.49106
3.54714	1.45171	1.17682	1.49036
2.52257	1.02599	3.77605	1.30779
2.77623	1.03633	1.02104	3.57666
2.22473	1.3016	0.956956	2.96575
2.22752	1.98484	1.53601	4.53327
2.42325	1.79407	1.83176	4.69335
2.66631	1.62181	3.70965	4.14267
1.60486	1.19986	0.608961	0.634164
2.29326	1.78871	3.90907	3.41434
2.44692	1.37075	3.34954	1.64468
1.86844	2.15693	1.86603	2.17613
1.25647	1.15728	4.37313	4.14322
2.59285	1.33839	2.44016	1.87983
3.06922	1.5295	2.19126	4.26801
1.50848	2.47847	2.40084	2.57234
1.52978	1.72221	1.25973	1.85057
2.636	3.28135	2.63683	4.49097
2.20187	0.9538	1.96633	3.99155
2.38237	1.67093	2.19045	3.01096
3.69443	1.18349	1.77486	4.21525
2.054	1.45134	1.3287	3.75938
1.33206	1.63992	1.52848	4.34718
1.54746	1.79679	1.05437	2.93809
4.17747	1.89972	2.51431	1.3059
1.6934	1.2174	4.19935	4.30083
3.26004	1.97708	1	2.4961
2.32213	1.40839	1.1384	4.16477
1.15266	1.75103	1.87536	1.30849
2.6432	2.32912	2.25656	2.61812
3.02392	3.73852	2.19565	2.95234
2.09504	1.6037	2.26194	2.93907
0.923016	1.74673	1.67953	4.18964
1.91275	2.88093	1.67994	3.02588
1.95607	2.08036	1.89347	4.33255
2.46383	2.02466	0.703712	4.02222
1.85331	2.52911	1.76076	2.11944
2.00817	1.49151	2.50988	4.43438
3.082	1.81333	1.59765	1.45313
2.37492	2.65368	2.67987	4.11205
1.99258	2.3392	1.69894	2.32003
1.35295	1.00642	2.71002	4.13627
1.97355	1.55357	1.74524	0.861934
1.29847	1.86594	4.32541	3.57057
1.61291	1.69019	3.68256	4.27475
1.76438	1.94739	3	1.96962
3.17053	0.862449	4.0904	4.24958
3.25481	1.4524	1.3935	2.85135
3.46348	0.898211	2.56902	4.60299
3.38801	2.41805	4.18313	3.40125
1.50566	1.41122	1.97963	3.94945
1.56616	2.30119	1.69433	2.58579
1.59061	0.38561	1.20598	2.43384
1.5265	1.96354	1.12692	3.97126
1.51949	3.34727	3.7374	2.34623
1.56938	2.19508	1.44737	1.07205
3.59887	2.15379	4.12432	3.83952
2.74894	2.01863	0.970319	2.54891
2.8162	1.88152	1.00859	1.54511
1.87354	2.33315	1.46826	4.15489
2.9632	1.31317	1.86402	3.5499
2.56628	1.08679	3.61086	4.25534
3.00109	2.03332	0.764623	3.58943
1.30493	2.86072	3.66223	3.3684
2.6197	1.26776	3.35297	3.01598
2.92172	2.04121	1.82325	3.47308
2.63725	3.49946	2.48519	3.35265
2.7246	2.7909	2.13248	2.37807
2.57405	3.0917	2.36536	0.780549
1.19253	1.41299	1.22751	4.50644
1.31036	1.48065	2.55238	2.8896
2.93381	2.50599	1.86849	2.84296
2.46701	2.31339	1.89236	2.60252
3.3353	1.86558	0.932275	3.34282
1.52454	1.52478	1.15641	1.64368
1.84875	2.23677	2.19956	4.19253
3.53348	2.13965	1.75257	4.31023
2.53029	0.92724	1.55768	4.78449
1.88846	2.70522	1.65392	1.59721
1.7544	2.15696	0.743512	1.31255
2.39377	1.6102	1.20292	4.49437
2.48104	2.02932	1.60343	3.40962
2.9771	1.49134	1.13106	4.04341
3.79134	1.74364	2.35403	2.00249
2.00594	1.53912	4.16216	2.50283
2.13331	1.1831	1.81063	3.74946
2.55707	1.26284	2.20794	0.896732
1.71649	1.63274	2.17558	1.65262
3.62792	1.88661	1.95217	2.88161
1.65114	1.6704	2.10924	2.37013
2.70754	1.96228	1.83051	1.5574
3.50786	1.73824	2.52838	4.0389
2.57345	1.8434	2.69299	4.23696
2.79827	1.38523	1.72829	3.97124
2.23849	1.60753	1.75744	2.09281
2.16838	2.42037	2.78329	4.03929
2.63106	1.77208	4.15362	4.41398
2.48572	1.15557	4.22637	2.52827
1.64486	3.53951	1.38198	2.38159
2.44201	2.65231	2.60631	1.80816
2.40073	1.35934	4.33417	3.99047
1.86543	1.48766	1.7751	2.36566
1.29832	1.06154	1.63748	4.59269
2.69395	1.09829	1.23852	3.41691
3.25048	1.96222	1.18792	3.46025
1.53055	1.40877	3.87256	1.80397
2.61948	1.67006	1.36859	2.55683
2.17879	1.26026	3.64245	1.43061
2.31921	1.8031	2.92406	1.27947
3.55635	2.04508	1.02599	3.76449
2.08766	1.28641	0.932561	2.97945
1.36651	1.01257	1.43576	1.28852
1.44097	2.34531	1.70715	4.32716
4.16865	1.51076	1.86269	4.08959
1.65661	0.939234	3.63996	3.8729
2.97047	1.81224	0.74789	1.6595
2.30223	1.52647	4.02158	3.65086
1.17574	1.15063	3.4123	1.75254
2.56509	1.63224	1.90237	1.11938
3.11232	1.72782	4.31012	4.09074
2.15541	1.82699	2.44243	2.31649
0.905919	0.850469	2.17967	3.84686
1.83391	2.25433	4.46075	1.76997
1.85401	3.77637	1.11355	3.65147
1.56631	1.59471	1.25351	3.64923
2.52091	1.80188	2.44059	3.0856
1.87251	2.95217	1.95716	4.13215
2.03995	2.1529	2.1538	4.71868
2.9552	2.0035	1.79517	2.35713
2.26297	1.85384	1.48631	3.51017
1.91756	2.64729	1.02417	4.35891
1.31698	2.33276	1.84646	2.94022
2.06027	1.04999	4.16104	4.47633
1.21911	1.47582	0.890376	4.1392
1.58408	1.84651	2.09935	0.646176
1.70439	1.62461	2.18948	4.01757
2.99475	1.74118	1.92519	3.26741
3.03635	2.63523	2.16633	1.69188
3.09633	1.62951	1.55171	2.47369
3.46782	3.394	1.64587	4.47676
1.51715	2.16591	0.696444	1.32344
1.33403	2.06664	1.09453	4.10658
1.49734	1.88115	1.60253	2.16351
1.39962	1.89736	2.54655	4.36968
1.45405	2.4387	2.70398	4.02536
1.51287	1.27773	1.47161	2.75432
3.66995	1.93399	1.67277	3.50108
2.71569	3.53203	1.69701	4.33291
2.76332	2.75265	1.59957	4.24265
1.75754	0.972952	2.61994	3.01652
2.99494	1.48748	4.33456	1.25634
2.43066	3.14055	3.51163	3.67688
1.27737	2.37277	2.91152	1.34668
2.99995	1.36432	4.12623	2.51818
2.78193	2.22226	1.3749	2.9121
2.90002	0.366539	2.42375	1.88477
2.66662	1.44262	4.27251	2.89309
2.64497	2.06313	1.80163	4.32018
2.69948	2.08368	1.40318	3.086
1.09683	0.894269	1.21945	4.34387
1.24705	2.65966	1.15461	3.96337
2.38899	1.06632	3.82569	1.92544
3.4508	2.05947	1.22105	3.9182
1.68407	2.83417	4.28967	0.84155
1.49477	1.22671	0.949364	3.93203
3.49635	1.59196	0.959849	3.60742
2.37789	1.8236	1.47697	4.16758
2.31628	1.62753	1.80357	4.08153
2.38474	1.40599	3.52847	2.04143
3.04045	1.36532	0.863295	2.78173
1.87783	2.39904	3.91223	4.74488
3.89102	2.258	3.44266	3.3717
2.51474	1.77202	1.95839	3.7648
2.18432	1.5114	2.51265	2.47489
1.62538	1.48641	2.07813	2.28188
3.45519	1.8554	4.35435	1.07214
2.70041	1.65794	1.12771	3.81945
1.59178	1.79409	1.28697	2.53409
2.92738	2.1973	2.37345	1.4723
3.43964	1.61244	1.91314	4.14881
2.55123	1.89833	2.16535	3.69391
1.99134	1.69784	1.72594	3.87781
2.63712	3.36446	0.989919	3.69294
2.06538	2.3976	1.86048	2.67402
1.76331	1.08577	4.00384	2.86272
2.34199	1.45199	0.876645	2.69089
2.56558	1.3423	1.98966	3.36392
1.55064	1.17536	1.95103	1.59225
2.30812	1.23272	2.22368	4.18231
2.36769	1.83079	1.60957	4.43091
1.86289	1.37868	1.66009	4.51764
1.21029	1.06884	0.698134	1.49791
2.61146	1.72296	1.11679	1.14226
3.2071	1.70415	1.47933	4.37687
1.51977	1.16692	2.62544	3.25847
2.57564	1.98834	1.52057	5.34322
2.71337	1.12616	1.64196	0.834626
2.23612	1.3378	1.66219	3.54121
3.44493	1.48954	2.02174	1.64513
1.25285	2.40366	1.8075	2.83719
1.93798	2.29426	4.23994	2.30368
1.31911	1.52029	1.61167	2.954
1.43663	0.898741	2.47074	1.59663
4.19716	1.66633	4.2489	3.09587
1.92286	1.47132	1.29922	3.71943
3.12098	1.15561	2.49778	2.33865
2.30693	1.62606	4.18314	0.735046
1.06513	1.77829	2.50479	4.8114
2.4037	1.88829	1.49521	1.94473
3.03522	1.08971	1.19891	4.15189
2.1723	1.90248	1.12836	2.63038
0.86837	2.22189	3.79128	2.39972
1.88085	3.36805	1.2427	4.41967
1.82567	0.991717	3.45927	1.79636
1.45262	1.43943	3.24667	2.19496
2.46171	1.70251	0.872994	3.9938
1.86751	2.86586	1.45483	4.68482
1.97983	1.95784	1.74695	3.45799
2.98417	1.97172	1.79393	3.78328
2.436	2.49492	3.48635	2.00999
1.84537	1.81718	0.807785	2.3689
1.17344	2.13373	3.61321	2.9423
1.52467	0.89981	3.24453	3.54297
1.53504	1.44344	1.79391	1.31392
1.68697	1.67288	4.29962	4.31075
3.06615	1.61778	1.03497	3.93006
3.15088	1.75204	2.29057	3.8679
3.3161	3.06367	2.06457	1.69649
3.39468	2.27634	4.36677	3.64818
1.41697	1.30987	1.16099	3.81429
1.43229	2.11292	1.24063	4.26825
1.46965	0.414783	2.36001	3.68121
1.40914	2.40699	1.79068	2.30474
1.48921	1.64596	0.998464	4.10216
3.46996	3.14624	2.22721	1.88325
2.67005	2.08457	1.71345	3.72658
2.57186	2.12161	1.94157	3.05922
1.7232	1.95927	0.700008	3.95103
2.74619	1.69658	1.15853	3.82491
2.27298	2.17908	1.55588	3.48183
1.18588	1.20144	0.986642	1.81288
2.90013	1.03818	1.84094	2.33368
2.49891	2.20865	4.12873	1.27275
1.21442	2.01699	1.71555	1.21929
2.74664	1.2623	1.92764	4.35165
2.56663	1.88035	2.05834	3.53878
2.38141	3.58721	2.11854	2.91186
2.67435	2.66089	1.793	4.19625
1.08062	0.894333	1.66009	4.38434
1.24133	1.521	1.64781	1.64272
1.56292	1.52544	1.72034	4.02431
2.40284	2.60411	2.37693	1.65881
3.47986	2.21188	1.54662	3.43855
1.65113	1.44503	2.57025	1.78004
1.43732	2.06761	1.52348	0.960292
3.47127	2.03916	2.47318	4.24912
2.30362	2.25459	4.37959	3.97648
1.64289	0.868255	2.94823	2.04594
2.36164	2.56867	4.0346	4.23918
2.32777	0.621801	1.31553	3.98218
2.89851	2.14441	2.47796	2.81635
3.58106	1.66761	4.35015	4.06631
1.74899	1.87707	1.57949	3.52267
2.4691	1.45934	1.41837	4.0884
2.11059	1.76207	1.25961	2.70432
1.59248	1.44632	1.07423	4.34237
3.35888	1.34969	3.79244	1.49427
2.76312	1.72621	1.30066	2.16249
1.39345	1.50107	3.30266	1.27027
1.55373	1.47731	1.06506	2.48964
2.68536	1.37123	0.794775	2.86184
3.16615	1.86591	1.49714	2.59415
2.45981	1.69799	1.76263	1.82287
1.97423	1.65623	1.70786	4.1612
2.60453	1.29077	3.51273	2.88315
1.99178	1.58487	0.776503	4.38606
4.11538	2.11502	3.79426	4.07451
2.37033	2.52375	3.26175	1.99586
2.2691	3.44797	1.79326	4.53182
1.51503	1.19621	4.16509	1.35398
2.18742	1.41407	1.94679	3.77271
2.30934	1.44538	1.56255	0.827376
1.73249	1.07333	2.19082	3.94993
1.14276	0.501105	2.07868	4.26374
2.58997	1.24617	4.21795	3.53933
3.09216	1.17542	1.10242	4.01605
1.3957	1.84456	1.28535	1.94532
2.59572	1.38872	2.37776	4.2977
2.73084	1.61891	1.74909	2.89671
2.30177	1.31252	4.10124	3.1869
3.32172	1.71909	2.68732	3.80242
1.17383	1.35601	1.03137	2.46244
1.83647	1.92532	0.979303	2.25721
1.22352	0.972226	2.09733	3.89002
1.49929	1.51862	1.59221	0.943011
1.5925	2.15556	1.60342	3.90463
3.02476	1.39475	1.87337	2.48374
2.2216	0.890917	0.719639	1.15276
1.08646	1.64346	1.06094	4.0243
2.33191	1.30754	1.47809	3.56178
2.90093	1.15674	1.0697	4.11795
2.18789	1.78803	2.48277	3.38316
0.874327	1.677	1.54994	2.62303
1.73581	1.78237	1.53711	2.89812
1.77856	0.910173	1.63987	2.85422
2.29252	2.24968	1.92743	3.3571
1.75104	3.70589	2.06212	1.58381
1.95761	1.42858	1.55466	4.02444
2.97266	1.86256	4.24817	4.05538
2.22266	2.89998	1.58988	4.54372
1.8825	1.92376	2.48271	1.53277
1.23473	1.89428	2.44194	1.11115
1.87555	2.59302	1.71974	4.3492
3.45464	1.7112	1.24546	3.2172
1.44996	0.871536	3.37998	2.31863
1.42868	2.1901	2.86983	0.788549
1.48702	1.45939	4.18134	3.57579
1.37908	1.7569	1.15035	1.52218
1.40906	1.94132	2.55111	2.80569
2.75021	1.75074	4.24278	2.26726
2.22011	2.13338	1.71617	2.76963
1.19563	0.392261	1.65836	1.44721
3.06595	2.37349	1.47466	3.4484
2.60703	1.61824	1.14912	3.12169
1.13429	3.24391	1.11541	2.17404
1.51483	2.02455	3.73851	0.69361
1.71128	2.14914	4.32797	4.51895
3.11877	1.84242	1.05491	1.83131
3.16298	1.84364	0.810152	4.04001
2.81505	2.29954	1.42753	2.44773
2.6039	1.23829	3.44766	2.28495
2.55469	1.97978	0.795239	4.25702
2.54635	3.49202	3.84033	2.31461
1.12302	2.62824	3.02461	1.85059
2.20893	0.880225	1.73835	3.69925
1.21425	1.53239	2.2661	4.74039
1.45914	3.12393	1.96085	3.40609
3.13657	2.36655	4.1118	3.87436
2.61477	1.19182	1.15501	2.36528
2.58261	2.10292	2.36965	1.19529
1.66708	1.90122	1.12669	1.33017
1.59885	0.923448	1.73479	2.93479
3.54296	2.61214	1.77315	3.75277
2.24923	0.585178	2.00364	4.39446
2.69832	1.03338	1.51377	3.8912
2.26178	2.54703	1.07403	3.88735
3.73101	2.01148	1.4318	1.60267
1.56499	1.20735	0.915484	3.81449
2.28214	1.4451	1.75716	3.96388
1.8595	1.72838	4.04978	4.40477
1.50212	1.48368	0.872734	3.58303
3.27853	1.22974	1.49511	4.13457
2.52269	1.58003	1.59263	2.26997
2.23462	2.40841	1.98391	3.73666
3.43387	2.06314	2.0948	1.66599
1.4213	1.4653	1.5714	3.72093
2.67153	2.05669	1.89738	3.55613
3.24767	1.49285	1.52162	2.84513
2.3919	1.8249	1.61238	3.8713
2.65116	1.49915	0.686066	3.44831
1.95951	1.775	1.45738	2.32084
2.06967	1.59136	2.31366	1.72016
1.64861	1.75758	2.51627	1.2139
1.64927	1.93244	1.45117	4.06988
2.15137	1.61213	2.44154	3.21804
2.31915	1.89984	1.57845	2.80278
2.45268	1.62677	4.16029	4.45106
1.44762	2.21473	1.38958	4.16778
2.11963	3.37302	3.04076	4.04827
2.23846	1.08433	2.88756	0.501704
1.71319	2.47064	3.98879	3.3155
1.14326	1.37059	1.22419	1.59824
2.60941	1.37403	2.38483	2.07338
2.56226	0.999095	4.08827	3.73424
1.40491	1.1443	1.71713	1.65723
1.54643	1.22505	1.70729	1.02379
2.46688	1.83228	1.34614	2.1245
2.15318	1.17215	1.18162	4.15624
2.11529	1.58228	1.08283	3.84904
3.00271	1.30199	3.66905	3.00117
1.75934	1.60088	1.73001	3.34894
1.13891	1.25263	4.02192	4.02452
1.35817	1.90037	1.108	4.38283
4.1289	1.04961	0.890085	4.27271
2.94442	1.27577	1.37691	1.461
1.43269	1.44563	3.3466	2.09552
2.15755	1.38618	0.813696	1.15652
0.968157	0.87028	4.11616	2.3853
2.36232	1.52407	2.99958	2.77892
2.85579	1.33199	1.97264	1.72807
2.19372	1.12133	4.42773	2.88072
0.850619	1.73902	1.16296	4.11872
1.70988	1.64359	1.11552	2.93955
1.67563	1.64322	2.34418	4.37135
1.43248	1.17419	1.76242	3.77775
2.37073	0.84597	1.86134	2.03589
1.77198	2.28708	2.03344	4.45125
1.83575	3.52295	1.4205	1.32868
2.83558	1.40033	2.04609	3.83885
2.26227	1.79067	1.52293	0.827391
1.83084	2.90749	0.968768	4.05979
1.33898	1.92278	1.88938	4.02631
1.89393	1.87835	4.07258	3.41367
2.63886	2.03998	0.851314	4.10252
1.17109	2.63557	1.88821	1.84312
1.42305	1.72308	1.56794	2.90729
1.67731	2.17772	2.16567	4.393
2.89625	0.91497	1.91238	3.38747
3.14188	1.36239	1.58245	3.68993
2.85333	1.84086	1.62573	2.28308
1.41964	1.56108	0.718204	2.15961
1.23494	1.74368	1.083	3.60636
1.47231	1.30541	1.52862	0.960441
1.25432	2.09606	2.39325	3.78364
1.38917	0.38702	1.47037	2.41674
2.29145	2.2516	2.44439	1.19982
1.19801	1.3533	1.46713	4.09116
1.34208	3.01686	1.6396	3.33703
3.58415	2.04209	1.42653	4.23819
2.53322	1.93268	2.45323	3.43607
2.53025	1.87067	4.33412	3.58658
1.65325	1.72193	3.96589	4.54491
2.841	2.2912	1.12583	2.53706
2.2419	1.1583	2.43267	2.82028
1.16263	1.86934	4.16147	2.57749
2.84595	2.57931	1.48182	3.6055
2.80219	1.09925	1.20221	1.60341
2.62268	1.86462	1.10639	4.00777
2.51433	3.48403	3.57591	3.76117
2.48874	2.57487	1.2554	4.36282
1.04443	2.89783	3.29266	1.50807
3.23241	0.861441	3.121	1.14406
2.57228	2.37121	0.832932	4.31342
2.22141	1.44728	1.39144	3.04472
3.40661	2.20578	1.7097	5.32529
1.36137	1.38641	1.69875	2.13789
1.46094	2.28168	3.41742	2.39142
3.47012	2.21493	0.864814	0.844461
2.37074	1.98916	3.79943	3.44511
2.57586	0.859767	3.17224	1.54018
1.99319	2.59723	1.73939	2.68193
1.65044	0.514075	4.06703	2.33692
2.12962	1.00395	1.10833	2.61829
2.25571	1.76195	1.48933	1.43534
2.76642	1.44163	2.05134	3.24314
1.67835	1.76758	1.96299	3.03464
3.7162	1.44611	4.32387	2.06186
1.95961	1.48092	1.02505	0.705716
2.2548	1.54447	2.31856	3.40597
1.49454	2.40636	1.05287	1.88778
2.46026	1.65957	1.75081	3.87611
2.47767	1.39665	1.88641	4.2861
1.25024	1.20867	4.18137	2.10147
1.52873	1.52787	0.883357	2.56779
2.45012	1.75932	1.90479	3.05756
3.26498	1.57399	2.02124	1.93132
2.41759	1.79345	1.45658	4.74636
1.88136	2.08901	1.60545	2.37947
4.23855	1.54214	1.75058	3.38079
1.42286	1.57912	0.683531	3.98622
2.26834	2.03544	1.04773	2.36087
1.47532	2.37824	1.46602	1.23319
2.78385	1.10639	0.970119	1.15446
2.1253	2.85514	1.38316	2.88586
2.27589	1.30823	2.44808	3.60927
1.68611	1.48307	1.50009	1.32368
1.08112	0.492672	1.5006	4.33187
1.69969	1.21228	1.80208	3.8393
1.43622	1.72731	2.01551	4.03213
2.58112	0.998317	1.62488	1.54693
2.14721	1.81197	1.41917	3.91864
2.64544	1.56453	2.20073	4.01847
3.08259	1.22776	2.39876	4.21772
1.35127	1.62445	1.42904	0.835034
1.8267	1.31411	4.27523	4.16338
1.18482	1.78543	1.17686	2.22048
1.36054	1.08094	3.11045	3.62872
1.45057	1.47067	3.38057	1.71324
2.9285	1.22304	3.98135	3.24315
2.04677	1.8829	1.1159	2.7674
1.0077	1.36156	2.40989	3.86217
2.4076	0.834865	4.11583	3.98856
2.766	1.60374	1.64624	3.28479
2.25764	1.31259	1.60537	1.64272
0.850497	1.114	1.37249	4.30907
1.82139	1.8092	1.42394	2.6923
2.40227	1.60231	1.0461	3.38223
1.68924	1.0907	3.61552	4.13145
1.85007	0.846969	4.09231	4.15276
2.76184	2.18376	1.03793	0.602085
2.10906	3.31843	0.801231	4.11354
1.732	1.35546	1.29938	1.54815
1.17266	1.69799	3.3564	3.27409
1.81794	2.80278	0.907781	2.31878
2.73523	1.8648	3.68452	3.89949
3.03938	1.8505	3.15406	1.51631
2.65416	1.59541	1.67688	4.30667
1.47497	2.50378	2.0867	3.91218
1.27215	2.23981	2.02452	2.8208
1.37102	0.921162	4.38615	3.41737
1.15525	1.61355	1.04677	4.20855
1.29451	1.76738	2.24188	4.27054
1.58894	1.58027	1.17437	4.19879
2.72097	1.71992	1.74327	1.45935
2.25078	2.28294	0.81318	2.86425
1.11484	1.32014	1.13502	1.11246
2.77943	3.0162	1.87877	1.14702
2.36346	1.88609	1.46706	2.3597
1.09669	1.87461	1.57133	2.74218
1.39719	1.81558	0.695152	1.67358
1.60404	1.62051	1.03434	2.66607
3.0522	1.73567	1.45243	4.11907
2.35883	1.14949	0.936548	3.00417
2.47947	1.64229	4.01047	4.20047
2.37961	2.46952	2.54532	4.41396
0.999767	3.5997	2.25544	3.83735
1.0937	1.52177	1.5221	1.94904
1.33144	0.926352	1.54291	4.02664
3.31113	3.03334	1.82316	1.25528
2.40093	2.29771	1.71718	2.0332
2.45916	1.24864	1.9628	0.784286
1.3422	2.03152	1.99913	3.89829
3.31384	0.398511	1.43859	3.44687
2.14346	1.41334	1.4532	3.99476
2.71175	2.1502	2.33532	4.25559
2.11163	1.9276	1.37607	3.01034
2.68493	0.842871	1.37148	4.68415
3.63832	2.41211	2.36482	2.79229
1.52973	1.03352	4.18728	3.41925
2.25763	2.2786	1.23799	2.31374
1.85361	1.77922	3.14687	2.14887
1.54752	1.12043	4.07057	3.66207
3.27263	1.35647	1.14603	0.989942
2.46	1.74214	2.17645	3.83628
2.21156	1.26141	4.2472	2.4092
3.22349	1.42594	1.57444	4.12664
1.45458	1.49036	1.61567	1.20942
2.65071	2.26424	1.43542	3.42384
3.16617	2.09216	1.34294	3.75234
2.31659	1.39471	1.04194	3.49267
2.43376	1.6714	3.64373	3.67701
1.91544	1.43922	4.01613	2.43259
1.88642	1.26257	1.06619	2.73624
1.70974	1.58062	0.820151	2.47698
1.57293	1.77087	1.40401	3.6575
2.05713	1.34471	3.27097	3.77467
1.32766	1.73314	0.852073	1.44741
2.14181	1.99461	3.74639	3.81492
1.49725	1.59391	2.75149	4.37649
2.67477	1.75863	1.61403	1.36175
2.01771	1.53802	2.00354	1.25779
2.10574	2.03489	4.19779	4.48822
1.58524	2.7169	1.09881	3.12444
1.10973	1.07481	2.13424	5.18311
2.4858	2.47136	1.06306	2.39337
2.39262	1.40617	1.67369	0.834724
1.29737	1.30708	1.7313	3.52236
1.5201	0.478771	1.88098	1.54938
2.74817	1.02831	1.49938	2.87386
2.13791	1.14875	2.17952	2.28793
3.23667	1.6134	1.45581	1.40555
1.13253	1.08025	1.79661	2.58901
1.743	1.77745	0.913565	2.90105
1.09348	1.59214	4.0084	3.42099
1.26564	1.21513	0.942616	2.09605
4.05202	1.51283	1.7922	0.757652
2.90823	1.30805	1.65377	4.70018
2.07741	1.78083	1.74783	4.2043
0.946236	0.959643	1.89705	4.54785
2.23313	1.11806	1.34993	2.59983
2.7755	1.47415	1.56574	2.23351
2.11938	1.88737	0.652311	2.93696
0.824045	1.30414	0.967658	2.19906
1.76382	0.878142	1.51852	4.77044
1.60703	1.73144	2.28105	2.33826
1.37947	1.30882	1.34366	3.60669
2.40458	1.06222	2.1723	3.90114
2.38608	1.93641	1.43845	1.95374
1.61908	1.66046	1.47172	1.25166
1.83844	1.06711	1.37766	3.5581
2.73617	0.775158	2.23281	2.77309
2.24006	2.13781	4.30467	1.21769
1.88254	3.37973	3.86326	4.47269
1.17154	1.33502	1.01714	3.92039
1.72555	1.7537	2.43566	3.85747
1.40043	2.77886	4.12646	1.51756
2.93541	1.77314	1.40824	3.73491
2.65367	1.73683	1.42452	4.03114
1.20148	2.38289	1.11711	3.93851
1.28825	1.5796	3.28485	3.42951
1.4411	2.12623	1.23586	1.96066
1.13393	0.984327	3.07208	2.23704
1.22723	1.61323	1.06848	1.68934
1.60041	1.83658	0.764431	3.92265
2.60971	1.53679	1.23696	3.62479
2.13911	1.63817	1.58655	2.70495
1.04637	1.75052	1.66195	3.74953
2.80012	2.99955	3.38675	3.85044
2.24471	1.85	0.869796	3.38091
1.00396	1.90216	3.79869	1.52551
1.44942	1.92454	2.9881	2.29479
1.59173	1.69493	1.63847	1.08965
2.99832	1.63934	4.11168	4.37708
3.15556	1.1012	2.02658	3.3774
2.69496	2.38869	1.93949	2.81826
2.43757	3.65145	1.1013	4.43845
2.47033	0.903411	4.22413	4.35541
2.56729	1.38267	1.14434	4.16314
0.978248	2.29619	2.03654	1.9368
2.22576	2.9432	1.73473	0.468618
1.16794	1.16629	1.70286	3.0254
1.33588	1.93704	1.19331	1.6251
3.31768	0.408989	1.91467	1.54279
2.32266	1.85009	1.41004	0.918698
2.49185	0.880688	0.992427	4.24826
1.43196	2.42284	1.35961	1.90412
1.36434	0.934024	0.868594	4.21077
3.38402	1.0368	4.21626	3.75633
2.14733	2.37845	2.62958	2.68019
2.18879	1.91676	0.874664	4.21506
2.70223	1.14267	1.50977	3.37282
3.66613	1.67861	1.50312	4.3535
1.49412	1.32437	1.83509	1.24479
2.16846	1.3972	1.62142	4.16201
1.94846	1.16683	1.8546	1.26441
1.52482	1.53259	1.8949	1.06695
3.26793	2.28334	1.39765	2.70737
2.48399	1.97606	1.58742	2.48974
2.11314	1.3519	0.655578	1.64868
3.07654	2.16628	1.51829	2.60082
2.5098	2.06106	2.22678	4.16879
3.27271	1.53886	1.34408	2.89314
2.37984	1.87831	2.27153	4.43213
2.49949	1.37624	2.26651	4.48685
1.94989	1.72542	4.23449	4.01855
1.84076	1.91928	3.03486	1.86868
1.5434	1.48853	2.80918	1.2238
1.60106	1.70636	4.10839	4.02621
2.08807	1.56692	1.0948	0.738271
2.25917	2.24776	4.19012	4.06952
2.20747	2.63451	2.28448	3.62994
1.42419	1.12563	1.71932	4.02392
2.03404	1.38895	1.4461	3.96793
2.18695	1.35712	1.37939	1.94191
1.46638	0.538658	1.13112	4.4364
1.14252	0.938834	3.73856	2.90367
2.35473	1.15825	1.28588	3.16357
2.35951	1.62939	3.93371	3.57052
1.27503	1.31513	1.07746	2.34756
1.43186	1.32977	0.764464	2.19246
2.47624	1.751	1.20401	3.80797
2.78232	1.4284	1.6115	0.884129
2.20263	1.24533	3.34752	3.72021
2.97591	1.62979	0.89406	2.43219
1.19278	1.34196	4.00483	3.91185
1.7642	1.77072	2.92264	1.51285
1.10221	0.981277	1.69165	2.65645
1.16206	1.43262	1.77036	4.14602
4.12814	1.2047	1.43992	3.47536
2.88855	1.55555	1.92732	3.48467
1.41518	2.09203	1.87511	2.81559
1.99736	1.32782	1.15438	3.62272
0.885638	1.74041	4.1453	1.32326
2.34283	0.88621	1.99292	4.08592
2.83985	1.31427	1.1404	3.67619
2.17086	1.30197	1.66262	4.64862
0.813675	1.10139	1.54529	1.43167
1.64335	2.03665	4.00116	1.24794
1.50911	1.11834	2.49387	4.29441
1.28161	1.64193	0.882131	3.7841
2.2526	2.09747	1.13044	5.3452
1.65005	2.05078	1.985	0.862434
1.78462	3.34067	1.32549	3.48932
2.69726	1.30856	1.65216	1.42901
2.14291	1.66976	0.659678	2.89829
1.63541	2.71732	0.905483	2.06283
1.19537	1.76983	1.44436	1.42858
1.71972	1.95756	0.807945	2.48518
2.84815	1.78144	1.29557	3.36692
2.68735	2.5706	2.25255	2.97309
1.36895	1.56325	1.5242	2.24823
1.18416	0.896846	1.43275	0.794045
1.35932	2.26275	1.64555	4.60505
1.15754	1.57513	1.63272	2.61534
1.26834	1.59733	1.82801	2.82976
1.59631	1.65173	4.16152	3.97334
2.47361	1.7193	1.43691	2.60283
2.18079	0.800746	2.16597	2.57396
1.04044	0.414351	4.25483	4.54309
2.70243	1.74153	1.40257	2.11563
2.27471	2.98833	2.28312	2.262
1.00049	1.82131	1.13162	4.65359
1.33857	1.92829	3.08326	3.3436
1.56381	1.88655	2.96449	3.99467
2.89297	1.57582	3.96164	1.96776
2.23831	1.79764	1.02453	2.26195
2.52575	1.16645	2.41033	2.87371
2.25671	1.65518	1.50536	1.27341
0.934563	3.41719	1.67106	3.8393
2.03684	2.46292	1.43031	4.29252
1.04936	0.840186	1.34597	3.9137
1.2241	1.32834	1.05469	3.94679
3.13499	3.00788	3.79634	1.54726
2.25301	2.26104	3.86416	3.65992
2.40327	1.21707	1.09292	3.76316
1.31686	2.0929	0.828244	4.36642
1.44433	2.14749	1.19282	3.74645
3.3181	2.10647	3.26335	2.11005
2.0734	1.86852	0.879431	2.07449
2.64569	0.843513	3.73471	3.757
2.17958	2.32052	2.89256	1.76164
2.56279	0.550013	1.55538	3.62204
3.89684	1.76192	1.79956	3.90892
1.46544	1.00629	1.4283	2.71259
2.11438	1.89952	2.11795	3.95443
1.99311	1.1158	1.77791	3.17795
1.44668	1.39471	4.22161	1.35027
3.11161	1.21854	1.098	2.27431
2.27233	1.37691	1.94588	1.29773
2.07955	1.59085	1.09541	4.4694
3.23462	2.36704	1.72076	3.29443
2.58344	2.06953	1.84803	2.63581
3.02015	1.43652	4.01606	4.46755
2.25798	1.64505	0.903745	4.11637
2.38121	1.29364	1.55201	4.21065
1.80323	1.26976	1.88821	1.91164
1.7238	1.52015	1.43252	3.04571
1.45421	1.86233	1.57648	1.52539
1.60827	1.35957	0.625131	0.522326
1.9543	1.87516	0.87907	3.84326
1.3086	1.88124	1.29487	1.62477
2.19372	1.41468	0.789711	0.845388
1.37557	1.72593	1.3708	4.23532
2.65512	1.62342	2.21284	4.37443
2.01173	1.93047	1.54428	3.87006
2.14868	2.64287	1.55357	2.95031
1.45736	2.53409	1.87313	4.20406
0.974003	1.40114	1.86861	3.47774
2.47646	1.3822	4.19436	4.20368
2.27518	0.577625	2.18481	2.72137
1.21631	0.508669	1.53242	4.06686
1.4644	0.931495	4.21027	1.4207
2.56284	1.15693	1.42458	1.32471
2.02064	1.66869	2.16754	1.10429
2.8094	2.24839	1.16099	2.43664
2.79661	1.7306	2.92523	2.62643
1.1392	1.45515	3.06912	1.59333
1.76765	1.21621	4.1201	2.77963
1.0802	1.54685	1.09342	4.14343
1.23556	1.27004	2.26102	2.86314
3.91072	1.70656	1.29008	4.47015
2.76837	0.96127	1.61101	3.86166
1.38296	1.40123	1.36619	4.3955
1.92559	1.21108	1.3554	1.87343
0.853326	1.53295	1.06689	1.19974
2.11229	1.81654	3.73757	3.9615
2.55948	1.29913	1.5374	1.86316
2.22056	0.832654	4.036	0.668809
0.821375	1.71406	1.15356	3.70201
1.66243	1.2661	0.885598	4.1266
1.54641	1.32964	1.60773	4.18811
1.2769	1.10777	3.34317	4.03427
2.29515	2.00937	0.850752	1.83405
1.53022	1.03495	4.12628	2.9347
1.80926	1.95684	2.74074	4.66636
2.63908	3.33723	1.31591	3.15246
2.15061	1.28246	1.93275	3.66849
1.71033	1.68375	1.82531	2.24626
1.04542	2.72678	4.09959	2.18443
1.7178	1.85761	1.09158	3.52515
2.26515	2.10076	2.05297	0.879087
0.984359	2.35147	1.10633	3.64561
1.32476	1.54004	1.67139	2.34689
1.54713	0.821176	1.55349	4.07009
2.89355	2.10026	2.67827	1.44253
3.10175	1.51892	0.855175	2.59466
2.58607	1.76015	1.21339	3.93226
1.34269	1.65703	1.88066	3.5663
1.19887	1.61492	0.627559	3.40229
1.26495	0.834113	0.963563	4.52007
1.12266	2.16949	1.19013	2.62261
1.2231	1.20422	0.795701	2.93286
1.98045	1.88027	3.97806	2.46776
1.10475	0.430975	1.51121	3.81843
1.16759	1.5118	1.58122	1.37197
3.43822	2.22558	1.82736	3.99969
2.30229	2.97258	1.54453	3.70144
2.37989	1.80831	1.82478	4.55546
1.55353	1.87978	1.84968	1.41344
2.56926	1.71371	1.31854	1.31855
2.12176	1.57274	1.57783	4.46366
1.05545	1.75072	2.18275	3.26237
2.526	1.18646	1.40443	5.57479
2.62064	1.01981	1.3907	2.38771
2.36981	1.77638	2.26572	0.973441
2.52256	2.04013	1.37674	3.88901
2.33068	1.73621	2.28224	1.50063
0.981085	1.14948	4.0965	2.95798
1.88218	3.45624	1.13429	2.26257
1.38481	2.41157	2.93586	1.29437
3.02037	0.900584	3.19981	2.57272
2.23043	1.30642	3.9551	2.98787
2.08743	2.58231	1.10009	3.53723
3.30686	2.17042	4.10907	2.0822
1.47259	1.947	2.50918	0.827758
1.34199	1.32036	1.51754	4.0033
3.35613	2.04772	1.62274	2.2407
2.06603	2.13517	1.36484	2.54961
2.36557	1.81369	1.42871	2.43702
1.89148	0.823955	1.00377	4.55478
1.71811	2.36229	3.32576	2.08512
1.54668	0.889194	3.97692	2.38622
1.58157	1.35021	1.06861	4.58473
1.96966	1.70705	0.820217	3.33602
2.22049	1.6176	1.20166	3.8411
2.52134	1.31611	3.09226	2.03509
1.43736	1.41857	0.843723	3.52189
3.93407	1.42991	3.57524	2.85514
2.07256	1.64585	2.88217	1.23055
0.974084	1.10756	1.50923	4.25899
2.40711	1.32749	1.31358	4.26482
2.33577	1.59258	2.06216	4.06031
1.17297	1.51563	1.79394	1.45762
1.46302	1.76981	1.08109	3.88512
2.99653	1.81936	4.29391	4.31771
2.89873	1.38356	1.14959	4.04126
2.17572	1.82563	2.09239	3.66952
3.97412	1.55006	1.64794	4.14353
1.34776	2.00897	1.69748	1.70593
2.14371	2.66879	2.51387	2.02894
1.28771	2.51425	0.808711	3.89707
2.65078	1.3064	1.14626	3.99112
2.19425	1.38887	1.76932	3.60881
2.15231	0.576915	1.26592	2.62377
1.42471	1.0631	1.55091	4.06699
1.43382	0.982373	0.651746	3.22928
1.21425	2.24189	0.863451	1.43216
2.58102	1.70046	1.30955	2.26183
2.05761	1.5644	0.815136	1.27974
2.76001	1.16821	4.17528	1.35032
3.05888	1.49011	2.1931	4.37904
1.11727	1.75067	1.54388	3.41997
1.68739	1.63625	1.43514	2.69856
1.10256	1.02944	1.82836	4.07238
1.07894	1.25061	1.56117	4.50627
2.71341	1.40581	1.7931	4.24464
1.37406	1.75363	1.89611	0.555351
1.91081	1.28558	2.075	1.48574
0.903146	0.822034	1.40074	3.4131
2.17409	1.646	1.32323	2.32402
2.66383	1.20636	1.40498	4.02852
2.26771	1.28574	2.18955	1.71228
0.834874	1.04692	4.28246	0.864067
1.55456	2.01413	2.82674	1.92511
2.33128	1.11166	3.31073	4.22091
1.55229	1.59606	4.12412	3.8478
1.77459	2.00471	1.08318	2.73246
2.72149	3.17945	2.38707	3.20333
2.01423	1.30778	4.2591	4.32301
1.87659	1.73936	1.6672	4.55291
1.14695	2.70966	1.33021	4.14346
1.66638	1.78545	1.39684	1.39289
2.79883	2.17102	1.01576	1.13667
1.34522	2.28843	3.4791	2.27126
1.23321	1.56142	1.09335	2.6112
1.2639	0.885368	1.07346	1.68207
1.08595	2.1975	0.844772	2.64135
1.15096	1.53696	1.37928	4.21818
2.49559	1.70214	1.60375	2.86412
2.07386	1.49513	3.16034	4.62115
2.53095	1.65699	0.949143	4.61768
1.03666	0.835049	3.92408	1.8212
2.34107	1.35366	2.78898	4.00533
0.998939	2.78111	1.51758	1.21658
1.22995	2.32455	3.93189	3.87605
1.49664	1.11842	1.42738	0.657149
2.73396	1.93591	2.02633	3.63633
2.99381	0.391083	1.71186	4.29066
2.17648	1.75379	3.85072	4.1616
2.46188	2.84847	1.03887	4.14485
2.21474	1.82042	1.89813	1.84312
0.950567	1.88335	1.04237	4.3911
1.05226	1.79165	1.64714	2.94405
1.21686	1.53478	1.59419	3.59371
3.18556	1.72325	4.11299	3.24415
2.24262	1.20011	1.78777	2.25775
2.51895	2.37839	1.32805	2.1222
1.55054	0.934889	1.49195	3.74676
1.22989	1.72684	0.641415	0.957752
3.17316	0.987747	0.904813	3.65269
2.00071	1.77133	1.37694	2.42233
2.5208	1.76223	0.870872	3.94774
1.99577	1.09933	1.84375	1.24256
2.56504	3.51468	1.28931	3.53134
3.76397	0.873863	2.22502	4.10039
1.46367	2.27698	1.46549	3.65254
2.11597	1.41467	1.392	3.47641
1.93613	2.31382	1.80288	2.86964
1.39054	1.76183	1.50821	2.13989
2.93778	1.98726	1.84432	0.819152
2.29608	1.34185	1.77374	4.49758
2.00168	2.13686	2.03959	2.41802
3.02632	1.98351	1.37604	2.71941
1.3385	1.80754	4.07921	2.64278
2.92895	0.853739	1.49025	3.65775
2.89531	1.85962	2.10083	3.97138
2.09847	1.83689	4.33177	1.42534
2.39972	1.46924	1.12578	3.96412
1.80767	1.75205	2.96434	4.56152
1.38649	1.41966	4.08133	1.44653
1.86899	1.66211	1.10548	1.23101
1.46393	1.34982	2.33032	4.45683
1.8033	0.505527	1.16538	3.36025
1.23828	1.04686	1.66967	5.45637
2.18005	1.11339	1.25371	2.50883
1.36945	1.21207	1.3232	2.18062
2.57939	1.57125	1.04008	0.8561
2.00446	1.39824	3.27906	3.66646
2.03516	1.50813	1.45656	1.43104
1.43491	1.73504	3.82983	2.66565
0.964528	1.31275	1.00503	2.06212
2.3284	1.24401	0.853037	2.57031
2.23735	1.48019	1.50266	3.3998
1.32458	1.63405	3.09554	1.24873
1.36931	1.66736	0.885952	3.99367
2.37617	1.98928	3.75485	2.12413
2.21398	2.47931	2.59421	2.4405
2.08972	1.04317	1.95022	2.60826
2.93902	2.51602	1.79651	4.40707
1.63616	1.37948	4.37257	2.04654
1.05636	1.45227	0.982003	2.5017
1.14361	1.06705	2.0061	4.62054
4.06785	1.54424	1.05854	3.51832
2.77156	2.11344	1.78175	4.09163
1.38797	1.6929	1.78841	1.32664
1.78416	1.55239	1.41326	2.18517
0.764526	1.15562	0.588712	1.32859
2.19631	1.51692	0.831123	3.67253
2.56041	1.24531	1.30399	1.19023
2.24289	1.02614	0.768997	2.75953
0.772643	1.61836	1.79373	4.47679
1.59813	1.7765	4.02103	4.03036
1.48069	1.30283	1.43848	4.12713
1.21658	0.834819	1.86622	1.39332
2.23284	1.64705	1.77523	3.87211
1.35861	1.24905	1.41021	3.78973
1.71424	1.06747	1.71662	4.44377
2.70016	2.11987	1.26234	3.62177
2.04871	1.74848	1.4307	4.13888
1.65932	0.824968	1.49024	1.65636
1.0047	2.12542	2.03043	0.786062
1.69355	3.37794	1.35488	4.29492
2.85206	1.25879	1.4152	2.01179
3.20434	1.66172	2.12374	3.83271
1.36122	2.63833	1.42227	1.69478
1.19666	1.71175	1.49048	3.60242
1.14967	2.3999	2.06642	4.1127
1.0415	2.22702	4.19086	2.66084
1.22937	1.44433	1.13318	4.16391
1.53337	0.823628	2.73708	3.1148
2.48609	2.23312	3.09086	1.37326
1.99179	1.44734	3.89198	4.51373
2.51614	1.63194	1.11441	3.23158
1.00285	2.09257	2.08223	2.5897
2.33707	1.67118	3.93799	4.7139
0.947168	2.85772	1.60861	4.26382
1.21726	2.25269	1.39801	0.609986
1.44892	1.21546	1.2553	1.54262
2.83754	2.0089	1.02408	4.26843
2.49437	0.369064	3.32551	3.03571
2.1575	2.13409	1.11946	2.343
2.44532	1.46467	0.791443	4.26518
2.15018	2.81743	1.52609	1.94125
0.959533	1.80366	1.19422	4.33498
2.07545	1.83068	3.17844	4.01571
1.01191	1.74434	0.878206	2.851
1.155	1.58165	3.52067	4.25669
3.02285	2.22399	2.63873	3.28497
2.19048	1.1772	1.53337	4.39116
2.42777	0.91693	4.01176	4.37816
2.92344	1.69995	2.00221	1.4385
1.36549	0.989376	1.84022	2.62561
1.15248	1.66952	1.02097	1.02398
3.26951	1.7408	3.83595	2.54626
1.92315	1.12021	1.88247	2.40396
2.45415	2.3419	1.04893	1.69424
2.03223	3.58163	1.77814	2.55852
3.58383	0.798902	1.56563	4.04277
1.36346	1.33266	1.05061	2.76286
2.07399	1.40226	1.91785	4.47451
1.75405	2.18904	1.31166	3.90666
1.41212	1.99848	1.29948	4.56398
3.02577	1.17731	0.847531	1.83935
2.15776	2.10205	3.97777	1.10596
1.82424	2.05363	2.39355	0.706633
2.95673	1.82149	0.835752	3.53077
2.8696	0.843728	1.66137	4.34945
2.20864	2.2325	1.48179	3.985
2.29792	1.91988	1.79515	4.13919
1.69128	1.38083	1.15964	1.7972
1.57511	1.76772	1.45054	2.99979
1.36142	1.34584	1.4854	4.8306
1.38666	1.6372	0.615879	3.15879
1.85592	1.13625	0.986677	3.66549
1.98149	1.42418	1.9689	2.16141
2.07304	1.02195	1.4003	2.1698
1.27359	1.09611	1.33329	3.72912
1.97177	1.34875	2.07975	0.839922
2.11633	1.5809	1.46608	3.75337
1.3915	1.62925	1.36934	2.5863
1.06316	1.77649	1.77263	3.94498
2.23016	1.37319	1.38637	1.44776
2.22506	1.87646	1.98703	3.26713
1.16897	1.46361	4.24784	4.08789
1.41242	1.61819	2.78917	3.38756
2.38369	1.7389	3.87356	3.37831
2.17642	1.89007	1.04278	4.73198
1.92068	2.54248	2.1038	2.48846
2.80965	1.05175	4.06352	2.86145
1.64979	2.54163	1.57839	2.57957
0.938729	1.47951	1.20591	3.6099
1.07561	1.37597	1.36157	1.40846
3.84437	1.03882	1.02853	3.79696
1.27997	1.54942	3.24899	3.96788
2.72922	2.16537	1.13374	4.50335
1.85878	1.5091	1.20188	1.48787
0.722881	1.64655	0.85363	1.30207
1.9328	1.21948	1.14585	4.58962
2.56487	1.49858	1.53844	3.22609
2.2679	1.17398	3.06128	5.42647
0.761182	1.68881	0.858055	2.25173
1.6314	1.0931	3.43003	0.864876
1.48882	1.21066	2.53703	3.44086
1.26434	1.71381	1.3858	1.436
2.14121	1.39277	3.85448	2.59276
1.34354	0.837789	1.33543	2.14382
1.5771	1.23323	2.00512	2.6299
2.55911	1.63222	1.7863	3.58978
2.01784	1.26141	4.23784	1.2374
1.74342	1.09519	1.07319	2.98983
0.998714	2.14295	1.91294	2.24742
1.79629	0.981294	1.07511	0.729539
2.58977	0.805243	1.5756	4.06676
2.89927	2.73404	2.57463	2.16362
2.69126	1.99554	1.07462	2.50319
1.26944	1.18541	1.79882	4.70899
1.30428	1.75699	1.49403	2.62083
1.30793	2.70906	1.61223	1.82898
0.961086	1.7714	0.633931	2.40666
1.16389	2.17614	1.0581	4.63862
2.41399	2.16395	1.22986	3.31816
1.49055	1.419	0.812473	4.17009
2.49902	0.791719	3.95638	1.85118
1.93818	2.18991	2.10867	2.17532
2.3226	1.53559	1.49412	1.23562
0.986168	1.64032	1.40111	3.43693
2.26383	1.47005	1.80016	2.78589
0.983931	1.58594	1.70711	1.18222
1.26073	2.22211	1.4243	3.92514
1.45829	1.17507	1.68015	4.37342
2.81452	2.62328	1.27336	4.05822
2.56694	1.80533	4.41299	1.37727
2.10974	1.85453	2.02417	3.83235
2.50238	1.80769	1.30903	4.24251
2.17521	1.5995	1.40317	4.02377
0.88832	2.199	1.44734	3.79088
1.9695	1.13908	2.0549	4.42928
1.02949	3.38193	1.16502	2.16066
1.15891	0.859658	2.86542	3.9506
3.18499	2.4739	3.02983	1.65435
2.15881	1.31326	3.85245	2.66947
3.02639	2.25354	1.03042	3.69199
1.26285	2.8224	1.98668	3.68316
1.28699	1.17197	4.05933	4.14525
3.22178	2.01309	1.68399	3.02058
1.92879	0.426261	1.18456	1.35362
1.83322	2.18114	1.29456	1.41799
2.02283	1.65414	1.07316	4.32428
3.58235	2.0013	3.31378	3.33826
1.18255	0.828583	3.92158	2.65463
1.72874	2.24404	1.04941	4.27506
1.91197	0.986513	0.828355	4.64713
1.35475	1.70925	1.53509	0.566168
2.87956	1.68334	1.20038	1.88397
2.15046	1.53188	3.07043	1.54584
1.8261	1.09694	0.845286	4.43605
2.6461	1.73642	3.75182	3.15055
2.7406	1.3996	2.48993	3.99003
2.24013	1.15034	1.50315	1.6291
2.21495	1.34274	1.96866	1.75211
1.76134	1.36348	1.72348	4.29153
1.38895	1.91587	4.03849	4.11138
1.61484	1.94038	1.13225	2.6133
1.42041	1.34514	1.82596	3.19634
1.45613	1.3836	1.09021	4.34595
1.98306	1.53903	1.70288	4.26869
1.26834	1.76326	1.15253	2.61189
1.97401	1.78623	1.86157	4.14486
3.02061	1.33199	1.35117	1.73788
2.02084	1.76816	1.07793	1.4691
1.32189	1.40516	1.22593	2.65857
1.03255	1.70864	0.824005	1.00603
2.15058	1.62581	3.95848	2.26621
2.26026	1.89898	2.77785	2.63523
1.18469	2.4472	1.41901	1.59862
1.46839	2.51899	1.81643	2.36312
2.30192	1.03153	1.59552	4.07319
2.00999	1.41295	1.54893	2.80629
2.82455	1.42732	1.67098	4.53289
2.83421	1.03896	1.23611	4.58663
1.04938	1.33231	1.49324	4.09198
1.53701	1.0218	0.584954	1.82365
0.969634	2.16516	1.94837	1.11825
1.09746	1.63188	1.36025	4.0494
4.00964	1.41603	1.35291	0.673015
1.29285	1.19899	2.12189	3.61048
2.64026	1.49562	1.43817	3.61564
1.78229	1.10567	1.50714	4.2218
0.771607	1.07668	2.05099	4.37794
2.17657	1.66482	4.15081	4.1763
2.4842	1.15486	2.87236	2.89448
2.2809	1.46395	4.02742	2.80517
0.789017	1.50572	1.01291	4.11186
1.48403	1.7258	2.08797	3.43009
1.43606	1.24431	4.1281	2.24688
1.23616	0.836344	1.56658	2.07482
2.16923	1.20283	1.14827	3.69193
1.544	1.64644	1.28835	0.926102
1.65972	1.27003	1.04424	3.71721
2.64574	1.05604	3.20933	2.37604
1.91703	2.31389	1.15334	3.96615
1.65895	0.971179	1.04616	1.63438
1.01993	1.50409	0.922299	3.42811
1.66622	2.87522	1.51382	4.18579
3.18948	1.5866	1.16608	3.40291
1.19588	1.20671	2.83809	2.12788
1.28903	1.7337	0.924988	0.834646
1.19999	2.64252	3.82847	4.54623
0.989312	1.75279	2.42981	2.48954
1.14266	2.17203	1.48109	2.57027
1.46859	2.28065	3.96727	2.52395
2.47609	1.23389	2.02184	3.79262
1.88819	0.812947	1.67207	3.37638
2.48774	2.13345	3.79129	1.32579
0.962269	1.43072	1.14184	3.91402
2.25023	1.59261	1.83295	4.41039
0.911636	1.57989	1.05628	1.3733
1.24014	1.58504	1.61543	1.27297
1.37873	0.721187	1.48046	4.48018
2.56435	2.71225	1.84495	2.93799
2.8616	1.77146	1.34702	5.2452
2.1883	1.6886	0.590033	4.07177
2.04216	1.78576	0.879511	1.7805
2.35296	1.54423	1.16737	2.36692
0.923248	2.29986	0.828667	0.804427
1.00009	1.1201	3.80667	3.62392
1.16089	0.782095	1.76421	1.52824
2.95718	2.43118	1.35472	2.73638
2.2179	1.42157	1.79169	1.93372
2.34377	2.0907	1.65437	1.17814
1.41125	2.73859	1.44377	3.32265
1.15209	1.1412	1.72563	2.59396
3.05623	1.96229	1.20183	2.73496
1.90679	0.374291	1.47738	3.98555
2.40906	1.61211	1.44357	2.13931
1.98613	0.810737	1.85588	2.37123
2.28127	2.26646	1.30785	2.69248
3.75925	0.991238	1.38983	2.06538
1.3088	0.988617	2.00188	2.1938
1.89434	1.76497	1.36038	4.81964
1.86101	1.59018	1.48904	4.82668
1.29171	1.59177	1.90041	3.38942
2.9405	1.00879	4.32007	3.37371
2.01765	3.53779	2.67819	1.10823
1.81755	1.13364	2.89496	2.75803
3.11518	1.30168	3.95524	4.35021
2.65203	1.32151	1.08339	3.98567
2.74905	1.31509	1.8927	1.53809
2.21428	1.85921	4.12971	3.9615
2.27413	1.27687	1.59285	4.40542
1.78555	2.20733	1.14223	4.06831
1.43644	1.86405	1.32997	4.34998
1.61411	1.71666	1.11442	3.47529
1.47484	1.73017	3.17503	4.07927
1.80087	1.65955	1.13465	2.20895
1.32161	1.27412	1.07358	1.66885
2.02499	1.7484	0.869348	3.56215
1.23128	1.34098	1.48215	3.59759
1.86276	1.658	1.21538	2.57149
2.81574	1.58768	2.92176	3.91573
1.98183	1.36712	1.02527	2.89461
1.42494	2.35724	3.44455	1.37063
0.976698	2.47403	2.5021	2.13648
2.30136	1.08056	1.4074	1.32121
2.13469	1.41996	3.78711	4.52992
1.14369	1.41717	1.96435	2.47473
1.45489	0.966025	1.6865	3.01468
1.98768	1.29894	1.157	4.45679
2.64911	0.942916	3.81385	4.35226
2.75356	1.27563	1.86599	0.642998
1.08088	1.53128	1.14028	1.42987
1.51319	1.41744	1.54826	4.3938
0.961663	1.64511	1.54099	3.12461
1.0427	1.1616	1.81125	4.03557
4.11606	1.47231	1.37199	2.65123
2.79051	1.13153	1.46751	1.45191
1.88318	1.05343	1.67683	0.83335
0.724244	1.57349	0.617204	4.46037
2.01301	1.0876	0.84141	3.87085
2.47027	1.40917	1.0767	2.8165
2.2018	1.53852	1.70569	3.24367
0.740341	1.76174	0.812097	4.31194
1.5224	1.77936	3.73324	4.36872
1.43991	1.70684	1.98687	2.72757
1.21051	1.32328	1.4262	3.9435
2.26911	0.884382	1.34281	1.75659
2.10399	1.23422	1.75875	1.49469
1.60739	1.58575	1.6309	2.71813
1.62321	1.26123	1.40374	1.35217
2.6123	2.10451	1.65723	2.1247
1.87726	1.00311	1.2526	2.7039
1.57965	0.968973	1.88186	1.60081
0.963273	1.43156	1.28923	2.45463
1.23104	2.05879	1.41701	4.00923
1.64277	2.7199	1.93418	2.69571
0.921127	1.97188	4.24812	4.5231
1.1426	1.2275	2.64745	3.82523
1.38789	1.7186	3.16723	4.51412
2.59169	2.67726	3.82606	1.85232
2.85235	1.75067	1.11934	1.15454
2.5619	1.82419	1.92073	3.89782
1.17177	2.32163	3.97973	1.78923
1.13069	1.24299	1.50329	4.23099
1.23163	0.79471	1.14475	0.664742
0.946274	2.02256	1.42811	3.6384
1.1527	1.35576	1.06184	4.23955
1.10572	1.61033	3.18951	4.27857
2.7791	1.4632	1.01863	4.32119
2.01709	1.62902	1.09113	3.01825
2.30264	0.786755	0.821466	2.78031
1.36527	2.57219	1.47658	4.33208
2.22454	1.72581	1.07296	3.266
1.75223	1.68916	2.80677	2.10089
0.922504	1.69316	1.83902	2.04824
2.3371	1.51279	3.9074	3.61355
2.30598	2.08603	1.39613	0.99691
2.42984	1.09798	3.84694	0.906128
1.99528	2.05245	1.96952	3.61604
2.33679	1.26327	1.68143	2.36898
1.54637	3.42288	1.09386	1.47063
0.916315	0.768866	3.98879	4.01568
1.92023	2.5624	1.78806	3.50774
1.00074	2.27084	1.06812	4.11543
2.67519	1.0981	1.69274	3.54794
2.0422	1.80145	1.74221	3.56903
1.8159	0.365247	1.37044	2.86881
3.0074	1.58041	0.595096	2.02491
1.39181	1.83954	0.829813	0.787774
1.14457	1.71982	1.05653	4.59068
2.68567	0.801691	3.87236	2.28183
1.76533	2.24107	0.738954	2.79959
1.23851	0.920341	1.684	2.13386
1.45895	0.965659	1.32157	3.80371
1.70141	1.72334	1.37854	3.64998
1.83874	1.59469	1.69173	1.41069
2.38878	1.47794	1.69238	4.01779
3.60202	0.993644	1.43019	4.18671
1.15887	1.5994	1.69248	1.33797
1.82225	1.30466	1.30754	1.30966
1.70081	1.10387	1.44423	4.35009
1.36021	1.049	1.88648	3.09272
2.05422	1.33494	1.34569	5.23527
1.15698	1.38979	1.46662	3.36453
1.46145	1.79607	2.00556	3.86444
2.50089	1.26197	1.83104	1.83325
2.62287	2.20715	4.25166	2.29853
2.07985	1.19251	2.8121	0.774128
2.04668	0.525364	2.8308	3.54661
1.63559	1.45968	3.89995	1.61296
1.56084	2.11257	1.05076	2.70563
3.89234	1.73948	1.77639	1.91032
1.2487	1.29455	4.28959	1.20996
1.9178	1.67106	1.46554	3.51535
1.24813	1.30069	1.13446	2.55339
1.83749	1.70243	1.33936	4.40888
2.59116	2.3305	1.0201	4.20404
1.9481	2.34644	3.17602	3.49911
1.21518	1.0916	1.03448	2.62729
0.973327	1.50642	1.06419	4.28516
2.1259	1.41004	0.994864	2.16763
1.05661	0.931121	1.44617	2.42928
2.26818	1.11271	1.20703	1.95654
1.90238	0.913576	2.74234	2.43182
2.65358	1.5026	1.79458	4.82677
2.55549	1.35904	3.64101	2.8736
0.965997	1.54704	1.44378	1.55651
1.60929	1.14397	3.75212	2.05248
0.906876	1.44852	1.89099	1.13601
1.01556	1.08534	1.56323	2.6689
2.71944	1.04178	3.81285	1.14923
1.72618	1.56912	1.10051	1.16227
0.693086	1.14578	1.87344	3.58985
1.98347	1.3283	1.06249	3.86685
2.42306	1.55688	1.68055	4.36506
2.18989	1.72883	1.80006	1.52715
0.733017	1.88071	1.37724	4.08152
1.49937	1.60851	0.602392	3.79129
1.3276	1.38582	0.758869	4.22137
2.0076	0.834983	1.16301	1.45341
1.47598	1.16908	3.88749	0.917055
1.53589	1.55517	1.63457	4.27347
2.46951	1.08173	0.765521	3.90963
1.84077	2.16753	1.38881	2.07339
1.48659	1.03653	1.91952	1.64755
0.981381	0.961091	1.62035	3.56416
1.18455	1.32637	1.49152	2.48432
1.64303	2.04862	1.23749	3.91784
2.58315	2.60636	1.65233	3.9152
2.60187	1.9683	1.47584	1.31515
1.20921	1.31701	1.53282	4.4218
1.1376	1.55306	1.37527	2.43615
1.35941	2.62509	1.89962	3.26824
0.88938	1.70841	1.35196	4.45789
1.12482	1.91425	2.06085	4.29005
1.40142	2.27214	1.3279	0.624077
2.20642	1.20139	1.92165	1.44325
1.94866	2.08915	4.13322	3.12615
0.873856	0.777966	2.66943	4.18738
2.43499	1.34057	3.08278	2.03474
2.32988	1.55573	3.89549	3.90164
0.877348	1.53342	1.01169	1.67243
1.11521	1.6112	1.91626	4.49891
1.38871	0.704275	3.79737	3.86862
2.71988	1.82076	1.54945	2.66067
2.27292	0.422655	1.15011	3.17181
2.02454	2.07314	1.3945	4.44767
2.24715	1.07285	0.952445	4.42427
1.79782	2.63952	3.12921	2.68982
0.869388	1.70535	1.0474	4.10683
0.984196	1.68353	1.07198	1.81544
1.0853	1.6761	0.921226	1.48914
2.89527	1.4384	1.42515	2.57306
1.98669	1.65905	1.16468	3.44337
2.34225	1.14178	2.78896	0.984416
1.30364	1.69609	1.8678	2.17209
1.19775	1.44033	3.5303	2.60184
2.8709	0.942758	1.48286	1.49626
1.81684	2.16229	3.68151	2.50894
2.45043	1.22994	1.82167	4.06635
1.86701	0.800526	1.65672	2.72066
2.18187	3.41743	3.97561	4.55875
3.70931	2.52314	1.07937	4.58486
1.03902	2.15583	1.80441	3.78539
1.83793	1.09424	1.11406	1.71544
1.58074	1.88764	1.50236	1.09717
1.26604	1.14131	1.48669	3.61797
2.67684	2.2175	1.75272	3.58118
2.08448	1.89441	1.33636	4.14937
1.76504	1.70135	1.36611	4.27633
2.9864	0.815653	0.588044	4.13911
1.40621	2.17028	0.859127	1.80059
2.30604	0.909574	1.14759	2.76899
2.69498	0.958554	3.76596	4.65354
2.00569	1.46596	0.772365	3.20413
2.2054	1.35476	1.63903	3.8012
1.61584	1.60963	1.9704	2.1539
1.57764	1.56144	1.30745	2.00098
1.35346	1.26895	1.34621	0.881068
1.32279	1.05155	1.70671	3.61819
1.74934	1.13153	1.52994	2.26875
1.83648	1.32067	1.50445	1.42826
1.21321	1.35653	1.58393	3.97398
2.8163	1.03684	1.16256	3.31577
1.83278	1.21546	1.88522	4.27716
1.82275	1.51421	1.46925	3.36796
1.17771	0.530494	1.32419	0.724448
0.894077	1.52444	1.3142	0.616675
2.10896	2.02081	1.89843	4.53882
2.02906	1.64324	4.22455	2.4737
1.03858	1.25775	1.05422	2.62038
1.15498	1.67934	2.74013	3.58655
2.35846	1.48012	2.95547	2.35938
2.13184	1.69092	3.79819	3.47112
1.84733	1.81424	1.03672	1.27156
2.8335	2.29973	1.92889	3.88669
1.43263	2.30159	3.92787	4.10137
0.838628	1.07943	1.09457	1.42084
1.00211	1.43064	1.40764	1.21866
3.85608	1.38721	1.11864	4.34465
1.26478	0.95802	1.27985	3.06645
1.34438	0.947716	0.988395	5.32291
2.52866	1.29913	3.21557	2.28209
1.78906	2.29667	1.02227	1.84256
0.709892	1.61657	0.858432	0.748228
1.78641	1.34173	1.33329	3.44042
2.38137	1.11075	2.95957	1.48293
2.22802	1.35481	1.81658	2.74761
0.712332	1.04559	3.87603	1.99836
1.49614	1.60187	1.4362	1.11795
1.29649	1.11032	3.73173	2.42223
1.92674	1.14027	1.73848	3.27617
1.45259	1.30135	1.61	2.68747
1.6033	1.70177	1.04397	1.92361
2.45001	1.34259	4.03365	1.95982
1.79744	0.800392	1.73177	4.03452
1.67421	1.15927	1.15325	2.36187
0.949639	1.4484	1.52409	1.91268
1.51924	1.14318	1.61535	1.97387
2.6426	1.92121	1.72306	2.38421
1.19052	1.00245	1.37065	3.34835
1.16094	0.940954	0.581422	4.74015
1.23909	0.749258	0.866048	3.24019
0.874073	2.56822	1.10723	4.09458
1.15964	1.90149	3.70736	2.52592
1.3617	1.12294	0.759015	1.24441
2.36208	1.53009	1.60389	3.79967
1.69849	2.73945	1.35988	4.29246
2.3955	1.71055	1.30583	1.50308
0.855543	1.77657	1.65271	3.74108
2.36351	2.14614	1.66142	3.70273
0.910913	1.53128	1.50697	4.01552
1.15117	0.724601	1.10224	4.28945
1.25825	0.70916	1.59462	3.75449
2.55627	2.05644	1.38378	1.53062
2.72832	1.30081	1.84438	2.01633
2.25436	1.4762	1.39519	3.48916
2.0826	1.36864	1.28346	2.52081
2.25765	1.53858	1.91394	3.7848
1.4652	2.63876	1.84951	3.71001
0.881562	1.08579	4.32991	2.7328
1.76738	1.87131	0.99109	1.27582
1.04059	1.36681	2.67965	2.17917
1.06571	2.21467	2.99677	1.17533
2.84337	2.45139	3.93188	3.39008
1.99859	1.63424	1.10012	2.00795
2.34967	1.60682	1.92422	3.09055
2.84925	1.70049	4.03087	4.26423
1.15591	1.40716	1.2272	4.30802
1.13176	1.68513	1.46673	1.45886
3.11174	1.07199	1.14673	0.601762
1.72775	0.953418	1.29514	2.995
1.75528	1.48451	1.02473	4.43943
3.6355	1.64934	3.25134	2.15898
1.1072	1.49316	3.60158	1.44996
1.93419	0.956223	1.04122	4.13467
1.59679	2.13893	0.929399	0.986436
1.21036	0.827873	1.30637	4.202
2.70255	3.33363	2.87677	4.23978
2.14629	1.22483	1.83462	3.71995
1.68114	2.23215	3.74105	2.70184
1.35846	1.32159	1.3803	3.17251
2.25327	1.79499	1.32816	4.37562
2.62064	1.18483	1.88766	4.13077
1.997	2.27819	1.50471	3.77329
2.14746	1.71077	4.01248	1.66905
1.54146	1.65148	1.01236	1.30958
1.24582	0.794185	1.7429	3.40373
1.44434	2.10813	1.07542	1.18241
1.33167	0.861533	1.63207	4.31553
1.68589	1.35875	1.6558	2.36137
1.25757	1.64093	1.62928	2.04212
1.93549	1.5041	1.34636	1.57523
1.21981	1.29189	1.57906	2.44801
1.81887	1.11959	0.587425	3.98967
2.87264	1.38655	0.827445	2.73979
1.91714	1.40421	1.05437	4.40747
1.15673	1.0006	3.8599	3.54488
0.939777	0.918952	0.704599	4.53332
2.07855	1.1455	1.62946	1.71098
2.04522	1.17793	1.95247	1.03898
1.00611	1.43445	1.29045	3.92764
2.25508	1.62917	1.23186	1.66981
1.766	1.44718	1.82002	4.22375
2.73892	1.81514	1.61879	3.3578
2.55258	1.32734	1.48008	3.67119
1.00579	1.62481	1.66295	4.14446
1.41301	1.47936	1.18561	4.08434
0.85168	1.72721	1.20862	2.68736
0.933311	1.90735	1.83958	4.08397
3.97936	2.28365	1.29017	2.7337
1.31959	1.31798	1.11563	4.25932
2.53097	1.03027	1.85474	3.28517
1.79807	2.32267	4.14676	2.10917
0.746872	1.31823	0.972358	1.92763
1.80506	0.543965	2.58747	3.66619
2.40768	1.34727	3.86438	0.951926
2.16621	2.17849	1.05853	0.903538
0.755389	1.51429	1.90774	3.368
1.38261	1.32406	3.95664	2.29685
1.31026	1.34461	1.40925	1.38595
1.1723	1.13093	1.15429	3.92334
1.92616	1.05527	1.38621	3.35028
1.4193	1.51711	0.976995	4.12294
1.46244	1.12894	3.61413	3.20519
2.33974	1.07678	1.01913	0.63208
1.74134	1.42364	0.942253	3.66933
1.5141	1.65639	1.37352	2.62649
0.943587	1.26707	1.15154	3.40302
1.55161	1.16004	2.75054	1.24576
0.885523	1.55139	1.7653	3.94158
1.07797	0.903019	3.48575	4.45429
1.27181	1.12025	1.42026	1.4144
2.33673	2.08835	3.44157	1.24609
2.7336	1.049	1.87089	4.26064
2.51822	0.912657	1.55528	3.50407
1.21783	0.807599	1.04255	5.18666
1.14306	2.54405	3.85102	3.52397
1.11968	1.8248	1.78471	1.58895
0.847994	1.2465	1.14234	2.53603
1.16057	1.54908	1.66925	1.97077
1.37169	2.50157	1.62923	2.44301
2.60319	1.63313	1.54547	1.08981
2.18069	1.90847	1.29143	2.843
1.32984	2.11617	0.935401	3.59813
2.14008	1.12553	1.06935	2.04075
1.57446	0.777842	3.73575	0.670639
2.23711	2.21397	0.764972	4.82508
0.847298	1.32096	1.65101	2.55503
2.17796	1.69332	1.7247	2.86122
2.31973	1.46233	1.50013	2.38204
1.931	1.60434	1.48127	1.86438
2.34348	2.02646	1.55228	2.83634
1.47431	2.46693	1.11958	2.37404
0.853252	1.06966	1.3828	2.02782
1.62942	1.78052	1.44278	4.8136
0.986805	0.451454	0.556848	3.33371
1.6217	1.33232	1.91761	3.8238
2.86989	2.18378	1.31405	1.53431
1.13786	2.45739	1.2632	2.22135
1.11343	1.61374	1.93563	0.727139
2.88508	1.58723	1.36297	3.42822
1.63486	1.67244	1.21237	1.15148
1.27915	1.41492	1.82402	3.81171
1.65296	1.61704	1.22696	4.46941
1.86414	1.11746	4.20726	1.52584
2.1381	1.01342	2.49396	4.06633
3.44219	1.47943	3.06935	3.76586
1.04659	1.63798	3.63702	3.25573
1.77026	1.41049	1.07003	4.2762
1.67678	0.962017	1.85722	3.76546
1.17824	2.20488	3.72118	1.79366
2.55005	0.819885	1.13924	4.11453
1.9046	3.33799	1.43613	2.0825
1.98537	1.26387	0.948496	3.21429
1.05097	1.32448	3.49232	2.40668
1.37722	1.8097	0.892215	4.12653
2.14566	1.09085	0.930463	3.75598
2.41497	2.13123	1.37503	2.62978
1.99118	1.54769	1.07858	1.30615
2.09119	1.73893	1.47898	2.06772
1.5087	0.814513	2.7394	1.1868
1.22494	2.11407	1.72278	2.5665
1.44045	0.586151	3.40492	3.23677
3.7354	0.951426	1.33381	4.47449
1.22805	1.65883	0.96001	4.0838
1.82755	1.68619	3.45862	1.43013
1.18673	1.18135	1.6645	0.576384
1.81997	1.51736	0.998516	3.04617
2.69761	1.25753	3.97842	4.09892
1.76014	1.10142	1.67683	2.17824
1.14466	1.13762	1.13334	4.10139
0.894486	1.35512	1.46497	1.43125
2.08981	0.557441	1.55837	0.929611
1.29115	0.982354	1.3225	4.25369
1.1187	0.930935	1.966	1.6119
2.26247	1.2131	1.68496	3.97405
1.74341	1.65478	1.64244	2.77022
2.12582	1.28349	1.20149	3.27992
2.5765	1.64253	1.45711	4.2492
1.44778	1.34545	0.598143	3.78113
0.842587	1.47877	0.85235	4.25506
1.00371	1.71392	3.78771	2.69807
2.52493	1.64659	1.04997	1.69286
1.75826	2.29073	0.750327	1.26423
0.675169	2.15408	1.21999	2.74878
1.70349	1.03248	1.88261	1.31951
2.21433	1.36509	1.34797	4.41567
2.20305	1.23712	1.27877	2.42283
0.750982	1.21313	1.72043	1.50202
1.51713	1.46081	1.56941	2.47454
1.90397	2.23137	1.48617	3.86771
1.426	1.26987	1.53016	2.80514
1.55299	1.56306	1.86994	4.41917
2.30847	1.10617	4.37917	3.83664
1.71379	1.35244	1.86932	4.58554
1.4381	1.01882	1.32752	1.74718
0.934659	1.15051	3.04269	1.06314
1.54554	1.45898	3.62221	3.96593
1.19806	1.09802	1.09279	1.75521
2.70343	1.3054	1.84282	4.46856
2.52024	1.52604	3.92003	3.6315
1.18729	1.23964	1.40671	4.22933
1.11617	1.14614	1.15788	4.11784
[truncated: 22,006 more rows]

## Sheet: Figure 6E
WT cells			KO cells
Calcium Ratio	Speed		Calcium Ratio	Speed
1.26318	2.37684		0.406559	1.8
1.77628	2.22603		2.99206	0.6
1.79698	6.9216		1.97951	39
3.10305	2.74698		3.69638	3
3.23763	7.3929		2.75191	2.4
3.44761	35.6159		2.56138	2.4
1.60682	4.60319		2.1988	5.4
1.49825	1.0482		1.96617	1.8
1.87186	2.21633		2.38887	72
1.57565	0.998988		1.77186	34.2
1.59171	3.11452		2.51377	1.8
1.68963	1.16191		1.47471	4.2
3.41588	3.18133		2.07311	3.6
2.91774	1.907		3.94914	3.6
2.752	1.50148		3.26616	4.8
1.83474	2.47703		3.54453	4.8
3.09516	1.59172		1.75416	49.8
2.59263	0.413647		2.74962	3.6
1.39047	4.27591		1.08643	4.8
3.37405	1.95042		1.73032	10.8
2.71616	1.73513		2.64805	6
2.93665	1.43793		1.93787	1.8
2.89541	1.08709		1.71814	1.8
1.92928	5.38346		2.48965	1.2
2.74231	1.46415		2.41149	4.2
1.35837	0.47692		0.942072	3.6
2.62803	3.52697		3.04553	1.8
1.38412	2.53666		1.22529	3
3.1119	2.05915		2.42395	1.2
2.52153	3.6697		2.34254	33
3.45567	1.28264		2.01662	1.2
1.96481	1.48953		1.6722	2.4
1.72666	4.34985		2.65183	3.6
3.72981	2.41379		1.89319	25.2
2.67944	1.75926		2.83276	1.8
1.99814	5.03887		1.86621	1.8
1.85543	4.40138		2.23469	3
2.59836	0.765372		2.16738	9.6
2.62015	1.7453		1.90559	2.4
3.67161	0.432007		2.45029	1.8
2.23699	0.912468		1.78492	6.6
2.7066	0.935592		2.67554	1.8
2.0614	2.27276		1.80791	3
1.75476	1.63285		3.49887	4.2
3.67708	3.82622		2.05238	1.2
1.62715	2.58476		2.84184	3.6
1.88319	7.2981		1.5576	3.6
2.52936	8.4087		1.29436	4.8
3.33632	0.485059		1.51477	7.8
2.7119	1.15988		1.22169	3.6
2.80432	1.13969		1.4742	2.4
2.21526	2.48212		1.25206	40.2
2.43033	2.88735		2.17066	1.2
2.59015	6.23568		2.10216	2.4
1.70079	1.39985		2.24016	3
2.78756	38.6249		1.88088	1.8
2.38965	7.5234		1.32658	7.2
2.53732	1.51566		2.14431	1.8
2.07971	1.56412		2.32842	1.8
1.41111	2.3925		1.93455	9.6
2.84236	2.11027		1.33255	1.8
3.39059	26.5606		1.479	3
1.58262	1.6484		1.79107	0.6
2.8154	2.64671		2.79799	1.8
2.10325	1.44465		1.76841	3.6
2.32111	1.43069		1.08955	3.6
3.60196	0.438548		1.89689	2.4
2.1309	0.678864		1.75212	1.8
1.55631	1.13293		1.56985	33
1.61786	3.32727		1.85103	4.8
3.78693	0.771642		2.01871	1.8
3.24632	1.44592		1.95809	1.8
1.80084	1.11938		1.27759	0.6
2.37185	1.41503		1.71271	5.4
1.35669	2.23702		4.03893	4.2
2.78971	2.09422		1.01456	13.2
3.00091	0.886572		1.71417	0.6
2.11171	0.961314		3.02501	3
1.00887	2.80531		2.21026	2.4
2.00996	0.594217		2.94435	60
2.11787	4.93552		2.196	1.2
2.5146	2.40323		3.23246	3.6
2.11155	1.08957		2.02323	2.4
2.15949	0.549315		3.075	1.8
3.06677	4.82824		2.5824	5.4
2.52752	0.611358		1.08607	6
2.00271	1.07515		1.46635	34.2
1.40952	0.566581		2.0779	3.6
1.99547	2.71339		1.88263	2.4
1.34278	2.13809		2.08961	0.6
1.83068	1.33034		2.67196	3
1.88755	1.15413		1.73454	5.4
3.29248	1.45659		2.5976	0.6
3.34694	1.18324		0.421777	0.6
3.28976	12.028		2.20443	18.6
2.95113	0.493943		3.8029	0
1.49841	0.413729		2.59737	2.4
1.58492	2.92903		2.2644	1.8
1.80417	1.31632		2.01572	1.8
1.64357	0.727962		2.02203	2.4
1.57854	2.26679		1.76508	38.4
1.40769	2.42138		1.39079	21
1.70758	1.01476		2.18183	1.8
3.65028	1.54162		2.37362	4.8
2.81357	1.8135		1.41628	6
2.79244	0.30131		1.93747	2.4
1.88745	1.30088		3.15624	1.8
3.11821	0.946572		4.07887	1.8
2.65166	0.608334		3.51886	1.2
1.42642	0.616524		2.57197	3
3.39635	0.971646		1.00877	4.8
2.52398	1.59418		1.48065	2.4
2.9147	1.72324		1.88505	3
2.83446	0.640128		1.7495	1.2
2.73213	0.48011		2.37382	0.6
1.89852	33.55		2.34703	1.2
1.30415	0.907212		0.905248	1.8
2.65355	1.76749		2.84732	0.6
3.82024	1.39815		1.17877	1.8
3.03162	1.77942		1.65548	1.2
2.52359	2.73604		2.06458	18.6
3.46374	0.57697		1.79886	3
1.87222	1.87986		1.51095	1.2
1.59381	1.37425		2.5433	3
3.63035	0.222149		1.82093	14.4
2.67441	1.84772		2.6139	1.8
2.43344	3.91974		1.48757	7.8
1.97576	1.93417		1.92232	1.2
1.85153	3.55111		2.05982	9
2.47055	0.75444		1.93647	2.4
2.63189	0.279457		2.26548	1.8
4.01234	0.83874		1.70221	13.2
2.25728	0.51763		2.47171	1.2
2.53861	1.59376		3.2216	1.8
2.03945	0.682428		2.84575	1.2
1.63498	0.637518		1.48343	9
1.69821	0.72588		1.23464	7.2
1.8179	5.80868		1.38518	4.2
2.63029	5.79409		1.38745	1.8
3.54133	0.77583		0.580979	6.6
2.84154	0.552939		2.01917	1.8
2.76187	0.794076		1.9953	2.4
2.24988	0.711396		1.76049	1.2
2.50841	7.66986		1.77434	1.8
2.55073	18.993		1.17393	1.8
1.78389	1.35894		1.93948	1.2
2.27395	8.10924		2.34315	0.6
2.51193	0.711672		1.79821	9.6
2.0697	0.219021		1.25262	0.6
1.30585	1.04345		1.40673	0.6
2.71996	1.21137		1.78342	3
3.21944	52.589		2.68032	1.2
2.88915	0.700488		1.87603	2.4
2.14005	1.48016		1.65303	1.2
2.40972	0.443159		1.097	3
3.53621	0.666174		1.79338	3
2.13342	0.4056		1.60314	1.8
1.48546	0.645888		1.25329	16.2
1.74178	3.32329		1.71236	3
4.15711	0.733884		1.7742	1.2
3.13223	0.510422		1.94434	3
1.76272	1.70485		1.19357	2.4
2.51446	1.66508		2.10369	1.2
1.25656	1.88806		1.58325	2.4
3.07623	2.76658		0.881889	12.6
3.03777	2.04986		2.49078	1.8
2.10899	1.07669		3.98453	1.2
0.998216	5.31454		1.8529	1.2
1.99787	2.83576		3.04537	1.2
2.07048	3.52491		1.76443	33
1.48713	0.718206		2.24972	2.4
2.51452	1.16713		2.14885	0.6
2.06613	0.665904		2.87917	1.8
2.1385	1.268		1.90093	1.2
3.14798	2.17979		2.98609	0.6
2.41619	1.83806		2.56814	2.4
1.95204	1.12889		1.00812	6
1.35979	2.36551		1.59622	15.6
2.0096	2.03506		2.07306	1.8
3.62393	18.4226		1.82846	4.8
1.61644	2.93891		2.06168	3
1.38361	3.44834		2.36631	13.8
1.75502	1.82422		0.412925	1.2
1.53051	1.87499		2.15824	7.8
1.59428	1.18384		3.59723	1.8
3.13148	0.72252		2.58607	2.4
2.47033	0.58239		2.29296	0.6
1.39136	1.37459		1.97757	2.4
3.42095	0.78852		1.84191	0.6
2.90676	1.14027		1.78495	3.6
1.37874	0.540944		1.3038	6.6
1.7406	2.11184		2.23245	1.8
1.94219	1.96473		2.62152	3
3.31541	1.50332		1.35103	4.2
3.50791	9.88074		1.98765	4.8
2.80905	1.24927		3.73679	0.6
2.84013	0.64881		3.14596	3.6
2.56437	38.4496		1.61231	24
1.28148	1.1057		3.22472	3
2.6376	1.39169		0.996827	6
1.34785	1.1303		2.71692	0.6
1.63955	1.17706		1.52699	1.8
3.58764	1.88596		1.85824	5.4
2.71835	2.07712		1.71829	1.8
2.70349	0.734802		2.19883	1.8
1.93347	3.89654		2.22173	2.4
3.69618	2.44356		0.879132	24
2.6102	0.677598		2.76821	1.2
2.90431	0.525928		1.12196	1.8
2.54073	0.383939		1.7105	1.2
2.25071	0.919866		2.03168	0.6
3.69478	0.662562		1.80075	3.6
2.64382	0.562097		1.55663	1.8
2.14943	0.851496		2.51747	3
1.72677	2.71759		1.75263	7.8
3.71216	1.2899		2.54904	0.6
2.89155	1.70602		1.80738	1.8
2.56577	1.99763		1.6747	1.8
3.34657	0.641382		2.03488	1.2
1.77398	3.03457		1.94756	10.2
1.70939	1.03706		2.02044	4.8
2.65394	3.81292		2.30009	5.4
3.48536	0.238194		1.60133	3
2.72415	0.781872		2.37306	1.8
2.77972	0.955542		2.59151	0.6
2.26835	1.91894		3.44389	1.8
2.35954	2.63615		2.75472	6
1.87108	1.41921		1.22188	9.6
1.78458	1.75625		1.35377	2.4
2.45518	1.13022		1.58631	1.8
2.56725	1.91378		1.38856	1.2
1.78279	0.075613		1.14629	29.4
2.27367	1.95542		2.08225	1.2
2.51685	1.27474		1.60422	0.6
2.06825	0.716184		1.69127	3
1.36446	4.01031		1.1973	3
2.81159	1.18714		1.89123	1.8
2.85295	0.843846		1.72347	6
1.55499	2.03136		2.27261	1.2
1.90744	0.842076		1.25352	1.8
2.18431	3.55358		1.43041	0.6
2.37562	0.737712		1.63708	3.6
3.25894	1.58659		1.84341	1.2
2.05797	1.60654		2.93931	1.2
1.47143	1.23729		1.62874	0.6
1.73204	1.475		1.05489	3
4.2807	1.7332		1.79626	3.6
2.68786	4.06082		1.53069	0.6
1.72051	0.365953		1.20692	0.6
2.36771	0.729024		1.67916	2.4
1.25844	1.39133		1.94104	4.2
2.82184	1.3075		1.84047	2.4
3.0386	2.38235		1.14452	0.6
2.08427	1.05046		2.09777	2.4
0.993886	3.92663		0.87545	7.8
2.07003	1.92918		2.57367	1.2
2.10785	0.799014		3.83906	3.6
1.56269	1.05473		1.64789	0.6
2.77177	0.859872		1.83991	5.4
2.57345	1.39172		3.0814	0.6
2.00849	1.72591		2.10071	3
2.24107	1.26714		2.09369	1.8
3.11717	1.39848		2.82066	1.2
2.51573	0.555421		1.97851	1.2
1.86243	3.50382		2.4666	1.8
1.44207	2.86809		0.98505	4.2
2.06598	1.14606		1.63657	3
3.28852	0.493078		1.93963	1.8
3.4322	7.542		1.7388	4.2
3.47191	1.34639		2.04345	2.4
1.61081	1.4651		1.58197	2.4
1.50799	13.5635		3.35979	0.6
1.89748	1.85781		2.51273	2.4
1.51064	1.25486		0.974995	5.4
1.50042	0.978474		1.60276	6.6
2.89287	1.15559		2.52514	2.4
1.84337	2.69344		2.10377	16.8
3.18135	0.737226		0.398225	1.2
2.4445	1.73137		3.68149	2.4
3.19994	0.763638		2.48304	1.2
1.34581	2.09179		2.22602	1.2
2.79164	1.23735		2.01092	3.6
1.27132	0.546967		1.97272	1.2
1.57438	0.94179		1.84523	2.4
1.83014	2.75869		1.42614	4.2
3.22972	0.40088		2.81715	2.4
2.99141	0.834306		1.13718	1.2
2.8965	1.31474		2.16586	2.4
2.31892	40.5871		2.60627	1.8
2.74933	1.12947		1.38622	2.4
1.21955	0.579508		2.05354	1.2
1.36707	2.48533		3.90338	0.6
1.69242	2.10614		3.13548	0.6
3.71804	1.11439		1.43457	1.2
2.77286	0.95436		2.54482	1.2
1.64347	1.89157		1.68733	9
1.87761	1.21674		2.49776	3
3.62807	0.354343		1.63347	1.8
2.63439	0.999906		1.89578	6
2.48272	1.28551		2.37295	1.2
2.9067	1.35494		2.30261	1.8
2.15359	3.7656		1.00734	1.8
3.79934	0.819546		2.40409	15
2.6509	3.69215		1.72427	4.2
2.11712	0.897714		2.36356	4.2
1.6434	2.04997		1.67289	2.4
3.56689	0.388944		2.02335	1.8
2.75757	0.857196		1.60465	3
2.53509	1.84774		1.17426	3.6
3.44223	0.760458		2.00143	1.2
2.83891	3.55658		2.00629	3
3.42481	1.15558		1.60363	3
2.56605	1.16379		2.14939	3.6
2.73953	0.525969		1.80838	27.6
2.22047	2.56647		1.75255	5.4
2.16405	1.39429		1.70345	1.2
1.87761	1.52506		1.97351	1.8
2.42628	0.650004		2.50303	0.6
1.7805	0.957384		1.84275	0.6
2.61686	2.29845		3.42251	4.8
2.45961	9.85728		2.78675	6
1.67758	0.387906		1.41128	12.6
2.23141	9.48966		1.20889	5.4
2.31641	0.470293		1.38683	3.6
2.04857	1.53346		1.26675	2.4
1.35194	1.98079		1.17741	5.4
2.63475	0.858606		1.47383	4.8
3.21385	58.0909		2.0716	4.8
1.66439	1.03148		1.70923	1.2
1.73945	1.70781		1.18295	4.8
2.2363	3.89317		1.87227	1.2
2.40116	0.589252		1.67618	1.8
3.59367	3.13505		2.20457	1.2
2.08382	1.56004		1.1516	0.6
1.40155	0.369055		1.39021	1.8
1.59875	4.32252		2.67914	2.4
4.23187	0.781026		1.48984	0.6
1.66232	3.78023		1.01269	6
2.51817	1.4441		1.95765	1.2
1.19204	1.59686		1.22761	4.2
2.50595	1.88114		1.54286	0
2.9126	1.59838		1.68216	1.8
2.14463	0.250645		1.88425	3.6
0.949423	1.87006		1.856	1.8
1.995	1.3909		0.911629	8.4
2.11011	2.99737		2.43703	1.8
1.53986	1.29863		3.76855	1.2
2.76702	0.484917		1.6146	0.6
2.52367	0.864834		1.83078	5.4
1.93208	3.15584		3.00515	1.2
2.14902	0.60879		2.07412	0.6
3.09007	1.90907		2.09587	3.6
2.47134	0.80703		1.91835	0.6
2.04263	0.95133		2.90738	0.6
1.37048	2.43492		2.35341	1.8
2.03143	0.751698		1.00608	2.4
3.16349	0.443273		1.70999	5.4
1.30514	1.42341		1.92629	1.2
1.57874	0.293815		1.73098	3
1.84863	0.549544		1.9941	1.8
3.361	1.26395		0.392019	1.2
3.29779	4.30718		2.61709	0.6
3.40625	1.78122		1.80027	6.6
1.59414	0.508833		3.45513	3
1.28555	3.46995		2.2391	1.8
1.88109	4.98593		2.13646	1.2
1.49438	2.75473		1.93896	1.8
1.59972	0.832344		1.8935	1.2
1.5606	1.29608		1.84288	31.8
3.36936	1.07243		1.35363	4.2
2.81557	0.646866		1.24806	5.4
2.72428	1.9086		2.11418	3
2.00908	1.82281		3.71927	1.2
2.92898	1.25668		2.93338	6
2.53082	1.14824		1.56635	2.4
1.39343	0.29065		3.30877	4.2
3.11094	1.06715		2.42309	3
2.7758	1.10583		0.811276	2.4
2.8289	0.531209		1.48815	1.2
2.80699	1.38866		2.33382	14.4
2.0541	1.87641		1.58052	1.2
2.77025	0.055265		2.24931	0.6
1.19498	1.75018		2.24586	0.6
2.48305	0.580235		0.882196	0.6
1.3752	1.03304		2.71469	0
2.67524	0.802248		1.06845	3
2.4347	1.08821		2.19945	4.2
3.44798	0.540646		2.7964	4.8
1.83738	1.9431		1.62065	0.6
1.48209	2.30188		1.91352	1.8
3.86843	0.821874		1.61692	3.6
2.56395	0.87621		1.46378	4.2
1.92344	3.30368		2.42374	1.8
1.79808	4.94644		1.77953	33
2.39465	1.04022		2.50465	1.8
2.40803	0.373917		1.83659	5.4
2.9309	1.83368		1.94044	3.6
1.93148	5.51196		1.68888	37.8
3.8049	1.27445		1.73545	2.4
2.6129	5.23553		1.6792	2.4
2.15046	0.389569		2.42769	2.4
1.78221	0.243848		2.29039	30
3.53921	1.02974		2.56935	1.8
1.76128	3.33592		1.1249	4.8
2.80669	7.69752		1.34225	4.2
3.54714	1.18749		1.45171	1.8
2.52257	1.29143		1.02599	2.4
2.77623	1.27421		1.03633	3.6
2.22473	1.52008		1.3016	3.6
2.22752	0.383635		1.98484	2.4
2.42325	1.65448		1.79407	0.6
2.66631	2.65402		1.62181	4.2
1.60486	1.15266		1.19986	3.6
2.29326	0.506353		1.78871	1.2
2.44692	1.7526		1.37075	5.4
1.86844	1.18706		2.15693	1.2
1.25647	0.700254		1.15728	0.6
2.59285	2.24213		1.33839	1.8
3.06922	0.508042		1.5295	2.4
1.50848	1.56652		2.47847	0.6
1.52978	2.93933		1.72221	2.4
2.636	0.374917		3.28135	4.2
2.20187	5.05385		0.9538	6
2.38237	1.38249		1.67093	1.2
3.69443	1.88795		1.18349	1.8
2.054	1.71155		1.45134	1.2
1.33206	0.560003		1.63992	1.8
1.54746	3.18455		1.79679	1.8
4.17747	0.514946		1.89972	3
1.6934	1.63666		1.2174	3.6
3.26004	1.55416		1.97708	1.8
2.32213	0.474172		1.40839	3
1.15266	0.97653		1.75103	0.6
2.6432	0.891066		2.32912	2.4
3.02392	1.39354		3.73852	5.4
2.09504	0.281284		1.6037	0.6
0.923016	1.12954		1.74673	2.4
1.91275	0.271899		2.88093	0.6
1.95607	2.53318		2.08036	1.2
2.46383	0.591035		2.02466	3.6
1.85331	1.33438		2.52911	1.8
2.00817	0.100946		1.49151	3
3.082	0.977994		1.81333	1.2
2.37492	0.564389		2.65368	1.2
1.99258	1.81565		2.3392	1.2
1.35295	0.961716		1.00642	3.6
1.97355	0.290587		1.55357	7.8
1.29847	1.46062		1.86594	1.8
1.61291	1.00929		1.69019	6
1.76438	0.813372		1.94739	1.2
3.17053	0.946698		0.862449	10.8
3.25481	0.748614		1.4524	0
3.46348	0.995358		0.898211	6
3.38801	1.8007		2.41805	1.8
1.50566	1.19501		1.41122	1.2
1.56616	3.70484		2.30119	1.8
1.59061	1.89704		0.38561	0.6
1.5265	1.68951		1.96354	2.4
1.51949	0.227171		3.34727	1.2
1.56938	0.810216		2.19508	3.6
3.59887	1.36966		2.15379	0.6
2.74894	2.03184		2.01863	1.8
2.8162	1.42041		1.88152	1.2
1.87354	1.74664		2.33315	39
2.9632	0.762054		1.31317	2.4
2.56628	1.44178		1.08679	4.2
3.00109	2.94436		2.03332	2.4
1.30493	0.417145		2.86072	7.2
2.6197	0.611232		1.26776	4.8
2.92172	2.2219		2.04121	1.8
2.63725	1.9588		3.49946	1.2
2.7246	0.234514		2.7909	2.4
2.57405	39.0002		3.0917	3.6
1.19253	1.15936		1.41299	6.6
1.31036	1.8635		1.48065	36
2.93381	2.24605		2.50599	1.2
2.46701	0.669558		2.31339	1.8
3.3353	0.215034		1.86558	2.4
1.52454	1.60186		1.52478	1.2
1.84875	1.74813		2.23677	0.6
3.53348	0.922764		2.13965	0.6
2.53029	0.870696		0.92724	24
1.88846	0.429328		2.70522	2.4
1.7544	11.6002		2.15696	20.4
2.39377	0.815328		1.6102	0.6
2.48104	0.877104		2.02932	27
2.9771	1.05949		1.49134	1.8
3.79134	0.53315		1.74364	2.4
2.00594	1.40513		1.53912	11.4
2.13331	2.44533		1.1831	5.4
2.55707	1.91571		1.26284	1.2
1.71649	1.97999		1.63274	1.8
3.62792	0.719898		1.88661	1.2
1.65114	1.88657		1.6704	1.2
2.70754	6.42726		1.96228	3
3.50786	0.989994		1.73824	9.6
2.57345	0.91701		1.8434	1.8
2.79827	0.802308		1.38523	0.6
2.23849	31.1822		1.60753	0.6
2.16838	1.87224		2.42037	1.2
2.63106	4.06597		1.77208	3.6
2.48572	4.44911		1.15557	1.2
1.64486	0.930222		3.53951	2.4
2.44201	2.20234		2.65231	4.2
2.40073	0.417455		1.35934	12
1.86543	0.542359		1.48766	2.4
1.29832	3.32548		1.06154	1.2
2.69395	1.00495		1.09829	1.8
3.25048	17.4271		1.96222	2.4
1.53055	1.00078		1.40877	1.8
2.61948	0.541508		1.67006	0
2.17879	20.5564		1.26026	5.4
2.31921	1.07891		1.8031	0.6
3.55635	1.83209		2.04508	1.2
2.08766	1.84148		1.28641	9.6
1.36651	0.879828		1.01257	2.4
1.44097	2.13883		2.34531	1.2
4.16865	0.489624		1.51076	1.2
1.65661	1.68516		0.939234	4.8
2.97047	2.38736		1.81224	3
2.30223	0.767778		1.52647	0.6
1.17574	0.17146		1.15063	5.4
2.56509	2.63405		1.63224	1.8
3.11232	0.929124		1.72782	1.8
2.15541	0.888306		1.82699	2.4
0.905919	1.09525		0.850469	11.4
1.83391	0.221222		2.25433	0.6
1.85401	1.87954		3.77637	1.2
1.56631	2.38529		1.59471	1.2
2.52091	1.59646		1.80188	1.8
1.87251	2.63231		2.95217	1.2
2.03995	1.22334		2.1529	1.8
2.9552	1.84008		2.0035	1.8
2.26297	0.8985		1.85384	0
1.91756	1.07186		2.64729	1.2
1.31698	0.871734		2.33276	3
2.06027	1.27814		1.04999	3.6
1.21911	3.84772		1.47582	6
1.58408	0.477903		1.84651	1.8
1.70439	1.85803		1.62461	5.4
2.99475	1.22345		1.74118	1.8
3.03635	1.49265		2.63523	1.2
3.09633	2.66404		1.62951	18
3.46782	1.0896		3.394	0.6
1.51715	2.30123		2.16591	0.6
1.33403	3.16718		2.06664	1.2
1.49734	3.73095		1.88115	1.8
1.39962	0.518816		1.89736	0.6
1.45405	1.32826		2.4387	4.2
1.51287	1.44966		1.27773	3.6
3.66995	2.00527		1.93399	3
2.71569	1.3718		3.53203	1.2
2.76332	1.2718		2.75265	0.6
1.75754	2.60113		0.972952	8.4
2.99494	0.366233		1.48748	1.2
2.43066	0.194463		3.14055	3
1.27737	0.879546		2.37277	0
2.99995	1.47279		1.36432	5.4
2.78193	1.39904		2.22226	1.2
2.90002	1.66205		0.366539	0
2.66662	1.71245		1.44262	0.6
2.64497	1.42878		2.06313	0.6
2.69948	2.16196		2.08368	0.6
1.09683	0.651282		0.894269	1.8
1.24705	2.17109		2.65966	0
2.38899	0.618768		1.06632	3.6
3.4508	2.13479		2.05947	7.2
1.68407	3.0798		2.83417	22.8
1.49477	1.76735		1.22671	2.4
3.49635	3.41266		1.59196	0
2.37789	1.38227		1.8236	1.2
2.31628	0.924216		1.62753	6
2.38474	0.474712		1.40599	3
3.04045	0.829134		1.36532	13.2
1.87783	3.48007		2.39904	1.2
3.89102	0.931488		2.258	1.2
2.51474	4.09931		1.77202	21
2.18432	1.00059		1.5114	1.2
1.62538	2.38956		1.48641	4.8
3.45519	1.7291		1.8554	3
2.70041	1.11899		1.65794	6.6
1.59178	1.74196		1.79409	4.2
2.92738	5.61428		2.1973	7.2
3.43964	0.81477		1.61244	1.2
2.55123	1.28353		1.89833	2.4
1.99134	30.6868		1.69784	3.6
2.63712	0.216917		3.36446	3
2.06538	2.22343		2.3976	6
1.76331	11.2266		1.08577	3
2.34199	2.01305		1.45199	1.8
2.56558	1.31255		1.3423	10.8
1.55064	0.351196		1.17536	25.8
2.30812	0.646392		1.23272	3
2.36769	1.7622		1.83079	1.8
1.86289	1.61027		1.37868	4.2
1.21029	3.37201		1.06884	1.2
2.61146	0.840852		1.72296	0
3.2071	1.23494		1.70415	1.2
1.51977	0.707412		1.16692	4.2
2.57564	0.464052		1.98834	1.2
2.71337	22.8291		1.12616	1.2
2.23612	0.630528		1.3378	2.4
3.44493	0.290493		1.48954	1.2
1.25285	0.910782		2.40366	1.2
1.93798	3.63058		2.29426	1.8
1.31911	0.583189		1.52029	1.2
1.43663	2.18324		0.898741	9
4.19716	0.702696		1.66633	4.2
1.92286	1.85816		1.47132	1.2
3.12098	1.73797		1.15561	0.6
2.30693	0.430936		1.62606	1.8
1.06513	0.212287		1.77829	2.4
2.4037	2.14616		1.88829	1.8
3.03522	4.55754		1.08971	3.6
2.1723	0.735174		1.90248	3
0.86837	1.39396		2.22189	2.4
1.88085	0.469496		3.36805	1.2
1.82567	3.01657		0.991717	9.6
1.45262	1.55964		1.43943	0.6
2.46171	0.436194		1.70251	3
1.86751	0.355712		2.86586	0.6
1.97983	1.33834		1.95784	1.8
2.98417	0.447347		1.97172	3
2.436	1.04798		2.49492	0.6
1.84537	0.954642		1.81718	1.8
1.17344	0.794064		2.13373	3
1.52467	1.70715		0.89981	7.2
1.53504	2.05066		1.44344	3
1.68697	0.200879		1.67288	1.2
3.06615	1.35413		1.61778	14.4
3.15088	1.81034		1.75204	0.6
3.3161	12.5414		3.06367	2.4
3.39468	0.883926		2.27634	2.4
1.41697	0.702852		1.30987	4.2
1.43229	6.80394		2.11292	1.8
1.46965	1.08661		0.414783	1.2
1.40914	1.2199		2.40699	0.6
1.48921	0.730104		1.64596	2.4
3.46996	0.445504		3.14624	3
2.67005	0.749748		2.08457	1.2
2.57186	0.752652		2.12161	2.4
1.7232	1.09172		1.95927	4.2
2.74619	0.846318		1.69658	0.6
2.27298	0.375745		2.17908	6
1.18588	1.22091		1.20144	2.4
2.90013	2.15875		1.03818	2.4
2.49891	3.02343		2.20865	13.2
1.21442	4.66471		2.01699	7.8
2.74664	0.458193		1.2623	4.8
2.56663	0.595289		1.88035	3
2.38141	1.22829		3.58721	1.2
2.67435	0.1163		2.66089	1.2
1.08062	1.30338		0.894333	3.6
1.24133	0.411446		1.521	1.2
1.56292	0.923748		1.52544	6.6
2.40284	0.928764		2.60411	2.4
3.47986	0.65481		2.21188	1.2
1.65113	1.91954		1.44503	0.6
1.43732	4.68578		2.06761	2.4
3.47127	2.37784		2.03916	1.2
2.30362	1.33441		2.25459	17.4
1.64289	6.26712		0.868255	1.2
2.36164	0.374234		2.56867	2.4
2.32777	0		0.621801	16.8
2.89851	0.895578		2.14441	9.6
3.58106	0.225172		1.66761	1.2
1.74899	2.08916		1.87707	1.8
2.4691	2.11009		1.45934	4.2
2.11059	2.54936		1.76207	1.8
1.59248	2.49536		1.44632	11.4
3.35888	1.91061		1.34969	16.8
2.76312	1.42569		1.72621	2.4
1.39345	0.320636		1.50107	1.2
1.55373	5.72674		1.47731	3.6
2.68536	12.0947		1.37123	4.2
3.16615	0.581116		1.86591	4.2
2.45981	0.857076		1.69799	33.6
1.97423	31.675		1.65623	3.6
2.60453	0.176197		1.29077	1.2
1.99178	0.804546		1.58487	2.4
4.11538	1.98815		2.11502	0.6
2.37033	1.20143		2.52375	2.4
2.2691	1.85216		3.44797	4.2
1.51503	0.413837		1.19621	10.2
2.18742	1.63334		1.41407	3
2.30934	0.334639		1.44538	2.4
1.73249	2.02889		1.07333	0.6
1.14276	3.01527		0.501105	9
2.58997	0.931788		1.24617	4.2
3.09216	43.8355		1.17542	3
1.3957	1.27195		1.84456	2.4
2.59572	0.521743		1.38872	1.2
2.73084	23.8624		1.61891	2.4
2.30177	1.9312		1.31252	2.4
3.32172	0.69954		1.71909	1.8
1.17383	2.64339		1.35601	6
1.83647	0.87318		1.92532	0.6
1.22352	1.08516		0.972226	0.6
1.49929	0.731148		1.51862	4.2
1.5925	2.37221		2.15556	2.4
3.02476	2.67286		1.39475	1.2
2.2216	0.412179		0.890917	6
1.08646	1.33524		1.64346	4.2
2.33191	3.09791		1.30754	3
2.90093	1.4256		1.15674	3.6
2.18789	1.35238		1.78803	0.6
0.874327	4.35661		1.677	4.2
1.73581	2.0153		1.78237	1.8
1.77856	0.947736		0.910173	28.8
2.29252	0.663174		2.24968	1.8
1.75104	0.493934		3.70589	0.6
1.95761	0.905298		1.42858	1.8
2.97266	0.597751		1.86256	3.6
2.22266	0.462848		2.89998	0.6
1.8825	1.81324		1.92376	2.4
1.23473	1.12178		1.89428	4.8
1.87555	0.587867		2.59302	0.6
3.45464	19.1968		1.7112	2.4
1.44996	2.19649		0.871536	12
1.42868	15.798		2.1901	0.6
1.48702	3.26775		1.45939	6.6
1.37908	0.583957		1.7569	1.2
1.40906	0.374996		1.94132	4.2
2.75021	1.00682		1.75074	1.2
2.22011	0.65046		2.13338	3
1.19563	0.478491		0.392261	0.6
3.06595	0.689688		2.37349	12
2.60703	0.635244		1.61824	10.2
1.13429	3.28385		3.24391	2.4
1.51483	1.62748		2.02455	3
1.71128	2.93524		2.14914	0.6
3.11877	1.16804		1.84242	3.6
3.16298	3.3961		1.84364	1.2
2.81505	1.68922		2.29954	2.4
2.6039	0.995862		1.23829	3
2.55469	0.593033		1.97978	0.6
2.54635	5.62438		3.49202	1.2
1.12302	0.908202		2.62824	2.4
2.20893	1.01336		0.880225	1.2
1.21425	0.250538		1.53239	1.2
1.45914	1.48689		3.12393	6
3.13657	2.36566		2.36655	2.4
2.61477	0.999384		1.19182	1.8
2.58261	1.51936		2.10292	1.8
1.66708	1.03885		1.90122	2.4
1.59885	0.98823		0.923448	1.8
3.54296	1.14931		2.61214	1.2
2.24923	0.97146		0.585178	13.8
2.69832	0.595231		1.03338	2.4
2.26178	0.704478		2.54703	12
3.73101	0.459158		2.01148	6.6
1.56499	0.564189		1.20735	6
2.28214	1.75177		1.4451	2.4
1.8595	0.129635		1.72838	0.6
1.50212	1.69794		1.48368	3.6
3.27853	1.00226		1.22974	4.2
2.52269	1.40117		1.58003	16.2
2.23462	1.03605		2.40841	1.8
3.43387	0.94065		2.06314	3.6
1.4213	1.61228		1.4653	0.6
2.67153	10.6655		2.05669	3
3.24767	1.64783		1.49285	0.6
2.3919	0.331568		1.8249	3
2.65116	0.360878		1.49915	3.6
1.95951	0.964638		1.775	6.6
2.06967	1.11076		1.59136	7.8
1.64861	0.925488		1.75758	0.6
1.64927	0.65013		1.93244	1.2
2.15137	2.12069		1.61213	1.2
2.31915	0.741966		1.89984	3
2.45268	19.2768		1.62677	3
1.44762	0.394008		2.21473	1.8
2.11963	2.19673		3.37302	18
2.23846	0.697302		1.08433	9.6
1.71319	1.47799		2.47064	3
1.14326	2.72341		1.37059	1.8
2.60941	1.44628		1.37403	4.2
2.56226	41.031		0.999095	0.6
1.40491	1.34161		1.1443	10.2
1.54643	0.81348		1.22505	4.8
2.46688	0.68481		1.83228	2.4
2.15318	0.676416		1.17215	12
2.11529	1.19279		1.58228	0.6
3.00271	1.65827		1.30199	1.2
1.75934	1.12636		1.60088	0.6
1.13891	1.29848		1.25263	1.8
1.35817	0.664326		1.90037	1.8
4.1289	1.82807		1.04961	2.4
2.94442	1.0617		1.27577	0.6
1.43269	0.533962		1.44563	3.6
2.15755	1.3409		1.38618	1.8
0.968157	1.13635		0.87028	6
2.36232	0.296607		1.52407	1.8
2.85579	1.25599		1.33199	2.4
2.19372	0.178231		1.12133	3
0.850619	3.02891		1.73902	0.6
1.70988	2.25974		1.64359	3.6
1.67563	1.13476		1.64322	3.6
1.43248	1.38875		1.17419	3
2.37073	1.91014		0.84597	5.4
1.77198	1.26752		2.28708	5.4
1.83575	0.88833		3.52295	4.2
2.83558	0.779664		1.40033	0.6
2.26227	0.508341		1.79067	4.8
1.83084	0.823128		2.90749	1.2
1.33898	0.209581		1.92278	3
1.89393	0.870252		1.87835	1.2
2.63886	0.934008		2.03998	0.6
1.17109	3.44722		2.63557	1.2
1.42305	1.59843		1.72308	1.8
1.67731	2.01548		2.17772	1.8
2.89625	1.41601		0.91497	3.6
3.14188	1.13999		1.36239	18
2.85333	21.7907		1.84086	1.2
1.41964	1.38015		1.56108	21.6
1.23494	13.2656		1.74368	0.6
1.47231	2.04338		1.30541	6.6
1.25432	0.627324		2.09606	3
1.38917	0.62982		0.38702	0.6
2.29145	0.635148		2.2516	9.6
1.19801	0.821886		1.3533	6.6
1.34208	1.47213		3.01686	4.2
3.58415	2.01701		2.04209	1.2
2.53322	0.646854		1.93268	1.8
2.53025	0.588788		1.87067	0.6
1.65325	0.925608		1.72193	1.2
2.841	1.25367		2.2912	45.6
2.2419	1.62463		1.1583	4.2
1.16263	0.704772		1.86934	7.2
2.84595	1.07062		2.57931	7.8
2.80219	0.43922		1.09925	4.2
2.62268	0.445356		1.86462	6
2.51433	1.11873		3.48403	0.6
2.48874	2.63402		2.57487	2.4
1.04443	0.651834		2.89783	1.8
3.23241	1.46482		0.861441	1.8
2.57228	0.648942		2.37121	2.4
2.22141	0.924114		1.44728	3.6
3.40661	2.18986		2.20578	3
1.36137	0.99792		1.38641	0.6
1.46094	1.66071		2.28168	4.2
3.47012	1.65994		2.21493	1.2
2.37074	1.57138		1.98916	0.6
2.57586	0.661314		0.859767	1.2
1.99319	0.638964		2.59723	1.8
1.65044	3.0853		0.514075	6.6
2.12962	1.43138		1.00395	2.4
2.25571	1.36369		1.76195	4.8
2.76642	1.02788		1.44163	2.4
1.67835	3.55475		1.76758	2.4
3.7162	0.325163		1.44611	1.8
1.95961	1.81435		1.48092	18
2.2548	3.33025		1.54447	27.6
1.49454	0.449168		2.40636	2.4
2.46026	0.521176		1.65957	0.6
2.47767	1.48766		1.39665	1.2
1.25024	1.58079		1.20867	20.4
1.52873	0.230612		1.52787	4.2
2.45012	8.39262		1.75932	5.4
3.26498	0.860172		1.57399	37.2
2.41759	0.923862		1.79345	0
1.88136	1.01804		2.08901	6
4.23855	0.726252		1.54214	3
1.42286	2.95844		1.57912	6.6
2.26834	1.0879		2.03544	0.6
1.47532	0.72849		2.37824	1.8
2.78385	19.8271		1.10639	3
2.1253	1.19209		2.85514	19.2
2.27589	0.176194		1.30823	1.2
1.68611	1.06179		1.48307	0.6
1.08112	4.86434		0.492672	12.6
1.69969	0.675576		1.21228	2.4
1.43622	0.703806		1.72731	5.4
2.58112	1.10425		0.998317	6.6
2.14721	1.61542		1.81197	1.2
2.64544	25.7179		1.56453	0.6
3.08259	1.48415		1.22776	4.8
1.35127	2.99657		1.62445	1.2
1.8267	0.680196		1.31411	6.6
1.18482	1.07576		1.78543	1.8
1.36054	1.46503		1.08094	3
1.45057	2.39598		1.47067	0
2.9285	2.16047		1.22304	0.6
2.04677	2.05568		1.8829	1.8
1.0077	1.08544		1.36156	1.2
2.4076	0.809496		0.834865	7.2
2.766	1.5479		1.60374	0.6
2.25764	0.461888		1.31259	3.6
0.850497	0.772086		1.114	1.2
1.82139	1.55632		1.8092	1.8
2.40227	0.408349		1.60231	4.8
1.68924	2.22662		1.0907	1.2
1.85007	0.542917		0.846969	6.6
2.76184	0.615978		2.18376	2.4
2.10906	0.213389		3.31843	1.2
1.732	1.25456		1.35546	1.2
1.17266	0.615108		1.69799	1.8
1.81794	1.37131		2.80278	1.8
2.73523	0.430422		1.8648	0.6
3.03938	1.15281		1.8505	3
2.65416	0.329585		1.59541	10.2
1.47497	1.99076		2.50378	0.6
1.27215	4.24994		2.23981	3
1.37102	2.0905		0.921162	0.6
1.15525	1.6507		1.61355	21.6
1.29451	1.89352		1.76738	0.6
1.58894	1.54569		1.58027	6.6
2.72097	1.22996		1.71992	0
2.25078	0.401545		2.28294	7.2
1.11484	0.901014		1.32014	30
2.77943	1.93104		3.0162	0.6
2.36346	0.985716		1.88609	1.8
1.09669	2.85871		1.87461	1.2
1.39719	1.89004		1.81558	1.8
1.60404	5.1118		1.62051	1.2
3.0522	2.10939		1.73567	52.2
2.35883	0.811224		1.14949	1.2
2.47947	1.67462		1.64229	1.2
2.37961	1.8586		2.46952	2.4
0.999767	0.888822		3.5997	0.6
1.0937	1.90342		1.52177	4.8
1.33144	1.22052		0.926352	6
3.31113	1.89527		3.03334	4.8
2.40093	1.23174		2.29771	1.8
2.45916	1.00141		1.24864	2.4
1.3422	0.794094		2.03152	1.8
3.31384	0.518352		0.398511	0.6
2.14346	0.513318		1.41334	66.6
2.71175	1.56334		2.1502	1.8
2.11163	0.770604		1.9276	1.8
2.68493	1.4544		0.842871	1.8
3.63832	0.236891		2.41211	2.4
1.52973	2.3101		1.03352	1.2
2.25763	1.29142		2.2786	12.6
1.85361	1.56839		1.77922	2.4
1.54752	2.77755		1.12043	1.8
3.27263	0.634326		1.35647	3
2.46	0.842568		1.74214	1.2
2.21156	0.815412		1.26141	4.8
3.22349	0.736368		1.42594	0.6
1.45458	0.121032		1.49036	25.2
2.65071	8.06502		2.26424	3
3.16617	1.73821		2.09216	1.8
2.31659	0.052632		1.39471	1.2
2.43376	0.402764		1.6714	0.6
1.91544	30.3698		1.43922	1.2
1.88642	1.12485		1.26257	6.6
1.70974	1.62945		1.58062	3.6
1.57293	3.37322		1.77087	2.4
2.05713	1.32071		1.34471	33.6
1.32766	2.64208		1.73314	4.2
2.14181	0.641544		1.99461	4.2
1.49725	1.5534		1.59391	8.4
2.67477	24.6193		1.75863	2.4
2.01771	2.76454		1.53802	7.8
2.10574	0.638832		2.03489	0.6
1.58524	1.04601		2.7169	7.2
1.10973	2.14727		1.07481	7.8
2.4858	0.955668		2.47136	2.4
2.39262	0.465463		1.40617	4.8
1.29737	1.01649		1.30708	1.2
1.5201	1.50625		0.478771	7.8
2.74817	1.17301		1.02831	2.4
2.13791	2.80092		1.14875	1.8
3.23667	1.12877		1.6134	0.6
1.13253	2.78887		1.08025	28.2
1.743	1.6873		1.77745	1.8
1.09348	0.767568		1.59214	1.8
1.26564	1.91265		1.21513	4.8
4.05202	1.14164		1.51283	0.6
2.90823	2.15591		1.30805	10.2
2.07741	1.09536		1.78083	1.2
0.946236	1.13891		0.959643	3
2.23313	1.51969		1.11806	0.6
2.7755	1.09939		1.47415	1.2
2.11938	2.16068		1.88737	1.8
0.824045	2.27359		1.30414	0.6
1.76382	0.576389		0.878142	8.4
1.60703	1.71973		1.73144	0
1.37947	0.993372		1.30882	1.8
2.40458	0.963798		1.06222	1.8
2.38608	1.85042		1.93641	1.8
1.61908	0.473223		1.66046	25.8
1.83844	1.16083		1.06711	0
2.73617	2.66527		0.775158	10.8
2.24006	0.980874		2.13781	0.6
1.88254	2.96104		3.37973	0.6
1.17154	2.10455		1.33502	0
1.72555	2.18204		1.7537	2.4
1.40043	4.46893		2.77886	1.2
2.93541	0.5254		1.77314	2.4
2.65367	1.36525		1.73683	2.4
1.20148	1.40643		2.38289	1.2
1.28825	0.609402		1.5796	2.4
1.4411	2.24497		2.12623	1.2
1.13393	1.75229		0.984327	9.6
1.22723	1.04994		1.61323	7.2
1.60041	0.232072		1.83658	1.2
2.60971	1.24744		1.53679	3
2.13911	0.185228		1.63817	1.2
1.04637	0.690192		1.75052	28.2
2.80012	1.26685		2.99955	1.2
2.24471	0.968214		1.85	1.2
1.00396	2.14895		1.90216	1.2
1.44942	0.96021		1.92454	0.6
1.59173	3.21998		1.69493	1.8
2.99832	0.880386		1.63934	4.8
3.15556	3.67976		1.1012	3
2.69496	0.376373		2.38869	1.8
2.43757	1.37675		3.65145	0.6
2.47033	5.17635		0.903411	7.8
2.56729	0.230164		1.38267	1.8
0.978248	1.84898		2.29619	3
2.22576	0.411337		2.9432	1.2
1.16794	2.13311		1.16629	0.6
1.33588	1.51607		1.93704	0.6
3.31768	1.60443		0.408989	0
2.32266	1.33198		1.85009	1.2
2.49185	1.11839		0.880688	0.6
1.43196	1.79458		2.42284	1.8
1.36434	3.18379		0.934024	26.4
3.38402	0.659178		1.0368	1.2
2.14733	1.2258		2.37845	24
2.18879	0.943314		1.91676	1.2
2.70223	0.317358		1.14267	3.6
3.66613	0.650358		1.67861	6
1.49412	0.067762		1.32437	3.6
2.16846	0.211765		1.3972	1.2
1.94846	1.06778		1.16683	26.4
1.52482	0.572057		1.53259	19.2
3.26793	1.19862		2.28334	1.2
2.48399	1.11151		1.97606	2.4
2.11314	0.214913		1.3519	1.2
3.07654	0.841794		2.16628	6.6
2.5098	3.91312		2.06106	0.6
3.27271	1.00124		1.53886	3
2.37984	0.13486		1.87831	2.4
2.49949	0.200897		1.37624	1.2
1.94989	0.767472		1.72542	7.8
1.84076	2.08054		1.91928	9.6
1.5434	7.61844		1.48853	12.6
1.60106	0.111703		1.70636	3
2.08807	1.46929		1.56692	1.2
2.25917	3.97369		2.24776	7.2
2.20747	1.05317		2.63451	3.6
1.42419	0.982314		1.12563	33.6
2.03404	1.41862		1.38895	4.2
2.18695	0.60498		1.35712	2.4
1.46638	1.1174		0.538658	7.2
1.14252	1.21063		0.938834	6
2.35473	0.837168		1.15825	3.6
2.35951	1.26069		1.62939	1.8
1.27503	1.63354		1.31513	1.8
1.43186	2.90171		1.32977	4.2
2.47624	0.984396		1.751	0.6
2.78232	0.203695		1.4284	1.8
2.20263	3.38596		1.24533	5.4
2.97591	0.76671		1.62979	0.6
1.19278	2.78506		1.34196	7.8
1.7642	0.504368		1.77072	0
1.10221	1.70114		0.981277	1.8
1.16206	1.97726		1.43262	2.4
4.12814	0.179381		1.2047	0.6
2.88855	0.358165		1.55555	5.4
1.41518	1.42783		2.09203	1.8
1.99736	2.34811		1.32782	1.2
0.885638	0.280373		1.74041	1.2
2.34283	0.467735		0.88621	4.2
2.83985	2.92849		1.31427	21.6
2.17086	1.30588		1.30197	1.2
0.813675	3.87388		1.10139	3.6
1.64335	0.994014		2.03665	3.6
1.50911	2.35276		1.11834	0
1.28161	2.53573		1.64193	4.2
2.2526	1.1858		2.09747	30
1.65005	3.17312		2.05078	3
1.78462	0.672726		3.34067	1.2
2.69726	1.33796		1.30856	0.6
2.14291	0.990216		1.66976	1.8
1.63541	0.45751		2.71732	0.6
1.19537	0.243941		1.76983	3.6
1.71972	0.222686		1.95756	20.4
2.84815	1.31492		1.78144	0.6
2.68735	1.67155		2.5706	1.2
1.36895	2.13533		1.56325	1.2
1.18416	2.82299		0.896846	16.8
1.35932	2.30225		2.26275	3
1.15754	0.89352		1.57513	8.4
1.26834	1.41904		1.59733	1.2
1.59631	1.44761		1.65173	0.6
2.47361	0.896076		1.7193	0.6
2.18079	0.547135		0.800746	11.4
1.04044	0.59438		0.414351	1.2
2.70243	1.35298		1.74153	16.8
2.27471	0.832098		2.98833	0.6
1.00049	1.29499		1.82131	1.8
1.33857	0.819672		1.92829	1.2
1.56381	3.72227		1.88655	3.6
2.89297	0.722148		1.57582	1.8
2.23831	2.55433		1.79764	0.6
2.52575	0.82602		1.16645	0.6
2.25671	1.6865		1.65518	0.6
0.934563	1.67399		3.41719	1.8
2.03684	0.561288		2.46292	1.2
1.04936	1.03592		0.840186	5.4
1.2241	0.613926		1.32834	2.4
3.13499	1.64596		3.00788	3.6
2.25301	0.737916		2.26104	2.4
2.40327	1.19977		1.21707	2.4
1.31686	1.75474		2.0929	1.2
1.44433	1.25816		2.14749	4.8
3.3181	0.792138		2.10647	1.8
2.0734	2.02486		1.86852	1.2
2.64569	1.05547		0.843513	0.6
2.17958	0.975246		2.32052	1.2
2.56279	1.58177		0.550013	6
3.89684	1.5419		1.76192	3.6
1.46544	2.61671		1.00629	3
2.11438	3.4613		1.89952	4.2
1.99311	0.78468		1.1158	4.2
1.44668	1.25429		1.39471	1.2
3.11161	1.05597		1.21854	16.2
2.27233	2.0282		1.37691	0.6
2.07955	0.271532		1.59085	8.4
3.23462	0.897306		2.36704	1.8
2.58344	3.86161		2.06953	1.8
3.02015	0.176952		1.43652	0.6
2.25798	1.02111		1.64505	0.6
2.38121	0.64476		1.29364	3
1.80323	1.03826		1.26976	40.2
1.7238	3.29236		1.52015	4.2
1.45421	14.8393		1.86233	3
1.60827	3.41177		1.35957	1.8
1.9543	0.975552		1.87516	7.2
1.3086	3.3835		1.88124	9
2.19372	1.47234		1.41468	7.2
1.37557	0.510911		1.72593	1.8
2.65512	23.6712		1.62342	1.2
2.01173	0.475741		1.93047	1.8
2.14868	0.133201		2.64287	1.2
1.45736	0.537348		2.53409	7.2
0.974003	3.0593		1.40114	4.2
2.47646	1.36107		1.3822	1.8
2.27518	1.5732		0.577625	34.2
1.21631	1.2674		0.508669	3.6
1.4644	4.76003		0.931495	3.6
2.56284	0.303038		1.15693	3.6
2.02064	1.63257		1.66869	3
2.8094	2.28029		2.24839	5.4
2.79661	1.30979		1.7306	0.6
1.1392	1.14287		1.45515	1.2
1.76765	1.93569		1.21621	4.2
1.0802	0.442376		1.54685	0.6
1.23556	1.06948		1.27004	15
3.91072	1.13314		1.70656	0.6
2.76837	3.08527		0.96127	3
1.38296	0.805518		1.40123	2.4
1.92559	1.40271		1.21108	1.8
0.853326	0.511646		1.53295	3
2.11229	1.23982		1.81654	2.4
2.55948	1.69559		1.29913	3.6
2.22056	1.63967		0.832654	15
0.821375	2.86082		1.71406	1.2
1.66243	1.78084		1.2661	2.4
1.54641	1.5493		1.32964	2.4
1.2769	0.592028		1.10777	1.2
2.29515	1.85321		2.00937	1.8
1.53022	0.477143		1.03495	2.4
1.80926	0.470291		1.95684	0.6
2.63908	1.19819		3.33723	0.6
2.15061	1.09097		1.28246	1.2
1.71033	2.74196		1.68375	1.2
1.04542	1.92154		2.72678	0.6
1.7178	0.387757		1.85761	0.6
2.26515	0.646062		2.10076	15
0.984359	2.46385		2.35147	0.6
1.32476	0.425234		1.54004	7.8
1.54713	4.24072		0.821176	3
2.89355	1.43283		2.10026	3.6
3.10175	5.10783		1.51892	7.8
2.58607	3.93202		1.76015	1.2
1.34269	1.22165		1.65703	3.6
1.19887	4.29204		1.61492	3
1.26495	3.40684		0.834113	10.8
1.12266	0.370487		2.16949	3.6
1.2231	2.15627		1.20422	4.8
1.98045	0.59925		1.88027	3
1.10475	0.497155		0.430975	1.2
1.16759	0.094558		1.5118	3
3.43822	0.157857		2.22558	5.4
2.30229	0.750438		2.97258	0.6
2.37989	0.523045		1.80831	1.8
1.55353	1.28374		1.87978	0
2.56926	1.24956		1.71371	5.4
2.12176	1.10039		1.57274	0.6
1.05545	0.525606		1.75072	4.2
2.526	0.802818		1.18646	0
2.62064	0.857856		1.01981	1.8
2.36981	1.56545		1.77638	3.6
2.52256	1.18843		2.04013	6
2.33068	3.10346		1.73621	11.4
0.981085	1.34422		1.14948	1.8
1.88218	0.918126		3.45624	0.6
1.38481	0.388337		2.41157	4.8
3.02037	1.87519		0.900584	9
2.23043	0.959304		1.30642	1.2
2.08743	0.987486		2.58231	4.8
3.30686	0.946716		2.17042	3
1.47259	2.674		1.947	2.4
1.34199	1.948		1.32036	1.8
3.35613	0.513123		2.04772	1.2
2.06603	1.14848		2.13517	1.2
2.36557	2.14741		1.81369	0.6
1.89148	1.94774		0.823955	1.2
1.71811	3.16715		2.36229	1.2
1.54668	12.9101		0.889194	7.2
1.58157	2.81368		1.35021	2.4
1.96966	0.756612		1.70705	0.6
2.22049	1.93574		1.6176	3
2.52134	2.4188		1.31611	3.6
1.43736	2.10797		1.41857	2.4
3.93407	1.24027		1.42991	32.4
2.07256	1.34751		1.64585	13.8
0.974084	1.28368		1.10756	2.4
2.40711	1.943		1.32749	1.2
2.33577	0.687042		1.59258	3
1.17297	0.98379		1.51563	3
1.46302	1.75145		1.76981	2.4
2.99653	3.64068		1.81936	4.8
2.89873	0.77958		1.38356	1.8
2.17572	1.05774		1.82563	7.2
3.97412	1.91451		1.55006	9.6
1.34776	2.97629		2.00897	1.2
2.14371	2.2223		2.66879	4.2
1.28771	0.44903		2.51425	4.2
2.65078	1.73605		1.3064	3
2.19425	1.96595		1.38887	1.2
2.15231	1.52767		0.576915	21.6
1.42471	1.76815		1.0631	9
1.43382	1.20908		0.982373	1.8
1.21425	1.8838		2.24189	9
2.58102	1.52051		1.70046	1.8
2.05761	2.32926		1.5644	1.8
2.76001	26.6678		1.16821	3.6
3.05888	1.48924		1.49011	1.2
1.11727	1.09375		1.75067	0.6
1.68739	1.78801		1.63625	6.6
1.10256	1.25314		1.02944	5.4
1.07894	1.31044		1.25061	0.6
2.71341	0.98985		1.40581	2.4
1.37406	1.53332		1.75363	1.8
1.91081	1.07735		1.28558	2.4
0.903146	0.471803		0.822034	4.2
2.17409	0.862596		1.646	7.8
2.66383	2.88699		1.20636	0.6
2.26771	1.22854		1.28574	20.4
0.834874	3.8291		1.04692	3.6
1.55456	3.08755		2.01413	0.6
2.33128	1.39792		1.11166	4.8
1.55229	2.64773		1.59606	1.8
1.77459	0.750588		2.00471	1.2
2.72149	1.15915		3.17945	2.4
2.01423	0.811506		1.30778	1.2
1.87659	0.463652		1.73936	2.4
1.14695	0.388772		2.70966	0
1.66638	2.37825		1.78545	1.2
2.79883	19.3727		2.17102	3
1.34522	0.92643		2.28843	0.6
1.23321	4.04657		1.56142	11.4
1.2639	25.5935		0.885368	7.2
1.08595	1.31206		2.1975	2.4
1.15096	4.26642		1.53696	19.8
2.49559	0.60198		1.70214	1.2
2.07386	1.15449		1.49513	17.4
2.53095	3.35775		1.65699	1.8
1.03666	0.107886		0.835049	12
2.34107	1.78322		1.35366	1.2
0.998939	2.99743		2.78111	3
1.22995	1.17049		2.32455	3
1.49664	1.96568		1.11842	10.2
2.73396	0.426753		1.93591	2.4
2.99381	1.28393		0.391083	1.2
2.17648	0.13045		1.75379	1.2
2.46188	1.01696		2.84847	0.6
2.21474	2.55583		1.82042	0.6
0.950567	0.210981		1.88335	1.2
1.05226	1.60605		1.79165	3.6
1.21686	0.82956		1.53478	1.2
3.18556	0.77856		1.72325	36.6
2.24262	1.49369		1.20011	3
2.51895	1.18747		2.37839	1.2
1.55054	1.58004		0.934889	4.8
1.22989	2.22345		1.72684	23.4
3.17316	1.7287		0.987747	1.2
2.00071	1.07144		1.77133	9.6
2.5208	0.245497		1.76223	4.8
1.99577	1.37958		1.09933	1.2
2.56504	1.02198		3.51468	3
3.76397	1.87619		0.873863	13.2
1.46367	1.53686		2.27698	0.6
2.11597	1.17761		1.41467	35.4
1.93613	1.79201		2.31382	3.6
1.39054	1.2817		1.76183	4.2
2.93778	0.99252		1.98726	1.8
2.29608	0.649512		1.34185	0
2.00168	0.900852		2.13686	4.8
3.02632	0.676038		1.98351	1.8
1.3385	0.531289		1.80754	0.6
2.92895	4.28735		0.853739	1.2
2.89531	0.48086		1.85962	5.4
2.09847	1.19141		1.83689	6
2.39972	0.972318		1.46924	4.8
1.80767	1.55967		1.75205	3
1.38649	7.59288		1.41966	1.8
1.86899	0.50639		1.66211	5.4
1.46393	1.23601		1.34982	4.2
1.8033	0.20831		0.505527	3
1.23828	28.598		1.04686	3
2.18005	2.14404		1.11339	1.8
1.36945	0.283375		1.21207	1.2
2.57939	9.85992		1.57125	1.2
2.00446	0.518151		1.39824	10.2
2.03516	1.75638		1.50813	0.6
1.43491	1.92596		1.73504	4.2
0.964528	3.9857		1.31275	1.8
2.3284	1.00274		1.24401	1.8
2.23735	0.891366		1.48019	0.6
1.32458	1.20692		1.63405	1.8
1.36931	1.5831		1.66736	9.6
2.37617	0.376687		1.98928	0
2.21398	25.0154		2.47931	5.4
2.08972	0.286843		1.04317	18
2.93902	1.64603		2.51602	5.4
1.63616	2.38577		1.37948	1.8
1.05636	0.373031		1.45227	3
1.14361	1.62175		1.06705	12
4.06785	0.963396		1.54424	1.2
2.77156	1.55632		2.11344	11.4
1.38797	2.60931		1.6929	0.6
1.78416	5.34148		1.55239	2.4
0.764526	0.318366		1.15562	3
2.19631	1.84855		1.51692	0.6
2.56041	1.51862		1.24531	24.6
2.24289	2.65361		1.02614	3
0.772643	1.57412		1.61836	1.2
1.59813	2.02509		1.7765	1.8
1.48069	1.22953		1.30283	1.2
1.21658	1.7927		0.834819	4.2
2.23284	1.04365		1.64705	2.4
1.35861	1.19033		1.24905	3
1.71424	0.821016		1.06747	1.2
2.70016	1.98753		2.11987	3
2.04871	0.355678		1.74848	8.4
1.65932	1.42155		0.824968	16.2
1.0047	0.801858		2.12542	0.6
1.69355	0.103217		3.37794	16.8
2.85206	1.54379		1.25879	0.6
3.20434	5.23963		1.66172	4.8
1.36122	1.67012		2.63833	0.6
1.19666	2.21514		1.71175	1.8
1.14967	6.64116		2.3999	6
1.0415	0.403727		2.22702	1.2
1.22937	1.49441		1.44433	15
1.53337	1.49031		0.823628	9.6
2.48609	0.332938		2.23312	2.4
1.99179	0.959736		1.44734	10.8
2.51614	0.62391		1.63194	1.2
1.00285	0.499857		2.09257	3.6
2.33707	1.51726		1.67118	1.8
0.947168	1.85212		2.85772	3
1.21726	1.98332		2.25269	0.6
1.44892	2.03612		1.21546	7.8
2.83754	1.66744		2.0089	3
2.49437	0.90435		0.369064	2.4
2.1575	0.08046		2.13409	9.6
2.44532	0.739548		1.46467	30.6
2.15018	1.44406		2.81743	1.2
0.959533	1.26379		1.80366	3
2.07545	1.20246		1.83068	2.4
1.01191	0.992454		1.74434	7.2
1.155	0.321415		1.58165	1.2
3.02285	0.305588		2.22399	32.4
2.19048	1.25		1.1772	1.8
2.42777	0.521011		0.91693	4.8
2.92344	0.622158		1.69995	24
1.36549	3.87727		0.989376	0.6
1.15248	1.30934		1.66952	7.8
3.26951	0.819138		1.7408	1.8
1.92315	2.0748		1.12021	1.8
2.45415	1.0249		2.3419	0.6
2.03223	1.00001		3.58163	0.6
3.58383	0.91233		0.798902	12.6
1.36346	2.61916		1.33266	3.6
2.07399	1.08891		1.40226	24.6
1.75405	0.38105		2.18904	4.8
1.41212	1.8289		1.99848	0
3.02577	1.56869		1.17731	0.6
2.15776	0.839448		2.10205	3
1.82424	1.49726		2.05363	1.2
2.95673	5.38568		1.82149	1.2
2.8696	0.710064		0.843728	0.6
2.20864	1.17923		2.2325	1.2
2.29792	1.59039		1.91988	1.8
1.69128	3.41073		1.38083	4.2
1.57511	0.916854		1.76772	2.4
1.36142	8.5686		1.34584	2.4
1.38666	2.02301		1.6372	2.4
1.85592	0.204572		1.13625	34.8
1.98149	9.50316		1.42418	2.4
2.07304	1.23151		1.02195	1.2
1.27359	0.374039		1.09611	25.2
1.97177	1.13832		1.34875	0.6
2.11633	0.682614		1.5809	0.6
1.3915	0.313406		1.62925	3
1.06316	2.82424		1.77649	7.2
2.23016	0.912438		1.37319	0.6
2.22506	1.8956		1.87646	9.6
1.16897	0.707718		1.46361	0.6
1.41242	1.17201		1.61819	3
2.38369	1.05812		1.7389	4.2
2.17642	26.5907		1.89007	0.6
1.92068	0.191122		2.54248	4.2
2.80965	1.19689		1.05175	4.8
1.64979	5.89238		2.54163	3.6
0.938729	0.978498		1.47951	1.8
1.07561	2.23662		1.37597	1.8
3.84437	0.79818		1.03882	37.2
1.27997	0.574555		1.54942	2.4
2.72922	1.99501		2.16537	6.6
1.85878	2.48362		1.5091	0.6
0.722881	0.242587		1.64655	1.2
1.9328	1.4014		1.21948	1.2
2.56487	1.76553		1.49858	1.2
2.2679	1.32278		1.17398	3.6
0.761182	2.23333		1.68881	0.6
1.6314	0.633186		1.0931	3
1.48882	1.09513		1.21066	1.2
1.26434	0.305191		1.71381	2.4
2.14121	1.39223		1.39277	0.6
1.34354	1.39078		0.837789	4.8
1.5771	0.5205		1.23323	31.2
2.55911	1.93651		1.63222	8.4
2.01784	0.405571		1.26141	1.8
1.74342	0.707646		1.09519	3.6
0.998714	0.946974		2.14295	3.6
1.79629	1.33298		0.981294	9.6
2.58977	1.01276		0.805243	12
2.89927	0.624		2.73404	12
2.69126	3.99491		1.99554	1.8
1.26944	0.471013		1.18541	1.8
1.30428	7.22268		1.75699	6.6
1.30793	4.9356		2.70906	0
0.961086	1.42964		1.7714	1.2
1.16389	6.17844		2.17614	3.6
2.41399	0.904602		2.16395	0
1.49055	2.75821		1.419	15.6
2.49902	0.605106		0.791719	12
1.93818	0.84279		2.18991	2.4
2.3226	2.61722		1.53559	12
0.986168	0.569771		1.64032	1.2
2.26383	2.54011		1.47005	23.4
0.983931	2.76986		1.58594	1.2
1.26073	1.15499		2.22211	43.2
1.45829	1.83559		1.17507	7.8
2.81452	0.723462		2.62328	1.2
2.56694	0.784152		1.80533	3.6
2.10974	0.836916		1.85453	1.8
2.50238	0.537441		1.80769	7.2
2.17521	0.833766		1.5995	1.8
0.88832	1.1828		2.199	1.8
1.9695	0.654798		1.13908	0.6
1.02949	0.952566		3.38193	3.6
1.15891	0.377654		0.859658	9
3.18499	0.831234		2.4739	3.6
2.15881	0.3967		1.31326	3.6
3.02639	1.09606		2.25354	3.6
1.26285	1.23971		2.8224	1.2
1.28699	0.67623		1.17197	1.2
3.22178	0.987504		2.01309	2.4
1.92879	2.30453		0.426261	1.2
1.83322	1.34419		2.18114	6
2.02283	0.83694		1.65414	1.2
3.58235	1.09345		2.0013	1.8
1.18255	7.63722		0.828583	1.2
1.72874	0.56582		2.24404	2.4
1.91197	7.39206		0.986513	0.6
1.35475	1.5191		1.70925	24.6
2.87956	1.54626		1.68334	5.4
2.15046	1.92115		1.53188	4.2
1.8261	0.288013		1.09694	3
2.6461	3.90369		1.73642	1.8
2.7406	0.917796		1.3996	1.8
2.24013	0.680856		1.15034	10.8
2.21495	0.216356		1.34274	3
1.76134	5.2696		1.36348	5.4
1.38895	7.206		1.91587	15.6
1.61484	2.08474		1.94038	2.4
1.42041	0.132041		1.34514	0.6
1.45613	24.1761		1.3836	0
1.98306	0.6888		1.53903	0.6
1.26834	1.01325		1.76326	6
1.97401	1.1912		1.78623	7.2
3.02061	5.54558		1.33199	1.2
2.02084	0.919578		1.76816	7.8
1.32189	0.680544		1.40516	8.4
1.03255	1.35787		1.70864	1.2
2.15058	1.46		1.62581	4.8
2.26026	2.23906		1.89898	1.2
1.18469	1.27091		2.4472	3.6
1.46839	2.0231		2.51899	3
2.30192	0.75408		1.03153	1.8
2.00999	2.56674		1.41295	2.4
2.82455	25.4806		1.42732	1.2
2.83421	1.26195		1.03896	6.6
1.04938	0.537256		1.33231	26.4
1.53701	2.56355		1.0218	1.2
0.969634	0.471001		2.16516	3
1.09746	0.89598		1.63188	0.6
4.00964	1.81285		1.41603	0.6
1.29285	15.244		1.19899	4.2
2.64026	1.84811		1.49562	1.2
1.78229	0.74205		1.10567	3
0.771607	0.152466		1.07668	8.4
2.17657	1.95792		1.66482	0.6
2.4842	1.03526		1.15486	0.6
2.2809	0.477418		1.46395	1.2
0.789017	8.68152		1.50572	4.8
1.48403	3.72554		1.7258	3.6
1.43606	1.00925		1.24431	3
1.23616	2.28397		0.836344	4.8
2.16923	1.2974		1.20283	6
1.544	2.28635		1.64644	2.4
1.65972	1.00649		1.27003	1.2
2.64574	0.455639		1.05604	3
1.91703	0.210997		2.31389	6
1.65895	1.20375		0.971179	11.4
1.01993	1.75458		1.50409	1.8
1.66622	5.08392		2.87522	4.8
3.18948	0.724188		1.5866	2.4
1.19588	0.860022		1.20671	0.6
1.28903	2.63302		1.7337	4.8
1.19999	1.01137		2.64252	1.2
0.989312	1.32089		1.75279	1.2
1.14266	1.02573		2.17203	15.6
1.46859	0.352255		2.28065	1.2
2.47609	0.398932		1.23389	8.4
1.88819	1.46611		0.812947	7.2
2.48774	1.16698		2.13345	2.4
0.962269	0.603504		1.43072	15.6
2.25023	0.91974		1.59261	2.4
0.911636	1.96079		1.57989	4.2
1.24014	1.32466		1.58504	1.2
1.37873	2.31241		0.721187	1.8
2.56435	0.222426		2.71225	1.2
2.8616	2.35697		1.77146	3.6
2.1883	1.15903		1.6886	1.8
2.04216	33.1167		1.78576	3
2.35296	1.53145		1.54423	0.6
0.923248	1.05562		2.29986	1.2
1.00009	2.23617		1.1201	0.6
1.16089	2.05965		0.782095	6.6
2.95718	1.41045		2.43118	10.8
2.2179	0.756012		1.42157	11.4
2.34377	1.49398		2.0907	2.4
1.41125	2.28959		2.73859	1.2
1.15209	3.14201		1.1412	1.2
3.05623	38.4643		1.96229	3.6
1.90679	1.08116		0.374291	2.4
2.40906	2.11786		1.61211	28.8
1.98613	0.327378		0.810737	1.8
2.28127	0.63792		2.26646	1.2
3.75925	0.174469		0.991238	7.8
1.3088	1.76968		0.988617	0.6
1.89434	1.26431		1.76497	6.6
1.86101	1.2418		1.59018	3.6
1.29171	3.18767		1.59177	1.8
2.9405	0.189803		1.00879	1.2
2.01765	1.49721		3.53779	1.2
1.81755	1.22932		1.13364	10.2
3.11518	1.15341		1.30168	3
2.65203	1.72579		1.32151	23.4
2.74905	0.214524		1.31509	20.4
2.21428	0.097723		1.85921	3
2.27413	0.451402		1.27687	1.2
1.78555	1.07708		2.20733	7.8
1.43644	5.6815		1.86405	1.2
1.61411	1.05788		1.71666	1.2
1.47484	2.04229		1.73017	15
1.80087	0.930696		1.65955	2.4
1.32161	5.92447		1.27412	2.4
2.02499	0.317221		1.7484	5.4
1.23128	0.941154		1.34098	9.6
1.86276	0.995718		1.658	1.2
2.81574	5.31544		1.58768	4.8
1.98183	0.542303		1.36712	1.2
1.42494	0.47693		2.35724	3.6
0.976698	1.73116		2.47403	1.8
2.30136	1.13288		1.08056	3
2.13469	0.331128		1.41996	4.2
1.14369	2.24792		1.41717	6
1.45489	3.10748		0.966025	2.4
1.98768	0.825126		1.29894	29.4
2.64911	0.291435		0.942916	1.8
2.75356	1.84684		1.27563	2.4
1.08088	6.80928		1.53128	2.4
1.51319	6.89868		1.41744	1.8
0.961663	0.811764		1.64511	0.6
1.0427	1.2739		1.1616	5.4
4.11606	0.751002		1.47231	1.2
2.79051	0.77811		1.13153	1.8
1.88318	2.83303		1.05343	7.2
0.724244	0.697062		1.57349	0.6
2.01301	1.1162		1.0876	3.6
2.47027	2.77361		1.40917	0.6
2.2018	1.12605		1.53852	1.8
0.740341	5.91439		1.76174	2.4
1.5224	1.39075		1.77936	0.6
1.43991	1.2766		1.70684	3
1.21051	0.23629		1.32328	4.8
2.26911	0.383333		0.884382	5.4
2.10399	1.93295		1.23422	3.6
1.60739	1.08307		1.58575	4.2
1.62321	1.45236		1.26123	4.2
2.6123	1.02441		2.10451	5.4
1.87726	0.66666		1.00311	5.4
1.57965	0.415108		0.968973	5.4
0.963273	1.80647		1.43156	1.2
1.23104	14.6381		2.05879	4.2
1.64277	3.13649		2.7199	3
0.921127	2.09204		1.97188	0.6
1.1426	1.30255		1.2275	0
1.38789	1.96369		1.7186	2.4
2.59169	0.537436		2.67726	1.2
2.85235	1.31969		1.75067	1.8
2.5619	16.5688		1.82419	21.6
1.17177	1.08089		2.32163	0.6
1.13069	3.47372		1.24299	2.4
1.23163	22.5837		0.79471	4.8
0.946274	0.819624		2.02256	1.8
1.1527	0.725604		1.35576	1.8
1.10572	0.760524		1.61033	1.2
2.7791	1.73662		1.4632	7.8
2.01709	0.791856		1.62902	0.6
2.30264	0.955404		0.786755	1.8
1.36527	2.05901		2.57219	1.8
2.22454	0.87027		1.72581	1.8
1.75223	0.814782		1.68916	1.2
0.922504	0.467698		1.69316	5.4
2.3371	0.642978		1.51279	1.2
2.30598	1.71881		2.08603	44.4
2.42984	0.488134		1.09798	1.8
1.99528	1.65029		2.05245	12
2.33679	1.54491		1.26327	11.4
1.54637	4.54527		3.42288	0.6
0.916315	3.00339		0.768866	6.6
1.92023	0.55469		2.5624	2.4
1.00074	1.77		2.27084	1.8
2.67519	1.24964		1.0981	0.6
2.0422	0.455009		1.80145	1.2
1.8159	1.93528		0.365247	1.2
3.0074	1.08259		1.58041	29.4
1.39181	1.45004		1.83954	1.8
1.14457	3.00867		1.71982	1.8
2.68567	1.24868		0.801691	1.8
1.76533	0.369499		2.24107	1.8
1.23851	5.6254		0.920341	5.4
1.45895	0.752832		0.965659	0.6
1.70141	0.851778		1.72334	9
1.83874	1.78586		1.59469	5.4
2.38878	2.25679		1.47794	3
3.60202	0.90498		0.993644	1.8
1.15887	3.46516		1.5994	1.8
1.82225	2.88068		1.30466	1.8
1.70081	1.43434		1.10387	10.8
1.36021	1.58812		1.049	21.6
2.05422	0.657378		1.33494	3.6
1.15698	1.16664		1.38979	1.8
1.46145	3.58288		1.79607	1.2
2.50089	2.94552		1.26197	0.6
2.62287	1.23374		2.20715	3.6
2.07985	0.280992		1.19251	0.6
2.04668	0.563282		0.525364	6
1.63559	1.97902		1.45968	2.4
1.56084	0.38819		2.11257	15
3.89234	1.10763		1.73948	7.2
1.2487	5.85588		1.29455	2.4
1.9178	2.00633		1.67106	10.8
1.24813	0.602556		1.30069	3
1.83749	0.566684		1.70243	1.8
2.59116	5.4233		2.3305	3
1.9481	1.60568		2.34644	3
1.21518	0.11771		1.0916	1.2
0.973327	1.75788		1.50642	2.4
2.1259	1.10083		1.41004	4.2
1.05661	0.781326		0.931121	3.6
2.26818	0.828972		1.11271	24
1.90238	0.471263		0.913576	2.4
2.65358	23.3678		1.5026	0
2.55549	1.82773		1.35904	1.8
0.965997	1.66096		1.54704	0.6
1.60929	4.64578		1.14397	6
0.906876	0.564748		1.44852	0
1.01556	1.05188		1.08534	1.8
2.71944	0.738216		1.04178	9
1.72618	1.84622		1.56912	0.6
0.693086	0.509552		1.14578	1.8
1.98347	1.04936		1.3283	1.8
2.42306	0.997278		1.55688	1.2
2.18989	2.83039		1.72883	6.6
0.733017	3.24576		1.88071	4.2
1.49937	2.00464		1.60851	2.4
1.3276	3.71466		1.38582	3
2.0076	1.52034		0.834983	4.8
1.47598	1.4588		1.16908	3
1.53589	1.06408		1.55517	3.6
2.46951	1.33607		1.08173	0.6
1.84077	0.777936		2.16753	3.6
1.48659	1.31443		1.03653	1.8
0.981381	1.32946		0.961091	7.8
1.18455	14.6321		1.32637	0.6
1.64303	2.55068		2.04862	4.2
2.58315	0.458394		2.60636	2.4
2.60187	0.757998		1.9683	0.6
1.20921	1.50232		1.31701	1.2
1.1376	6.04074		1.55306	0.6
1.35941	3.53912		2.62509	1.8
0.88938	1.40372		1.70841	1.8
1.12482	3.18055		1.91425	0.6
1.40142	1.68419		2.27214	1.2
2.20642	0.54386		1.20139	37.8
1.94866	1.74085		2.08915	1.2
0.873856	1.14125		0.777966	9.6
2.43499	1.00783		1.34057	2.4
2.32988	0.141113		1.55573	2.4
0.877348	0.641028		1.53342	2.4
1.11521	1.3262		1.6112	0.6
1.38871	1.21051		0.704275	7.2
2.71988	0.438327		1.82076	1.8
2.27292	0.497806		0.422655	0.6
2.02454	0.893478		2.07314	40.8
2.24715	1.21457		1.07285	5.4
1.79782	6.28122		2.63952	2.4
0.869388	0.208976		1.70535	3
0.984196	0.778338		1.68353	3
1.0853	1.3513		1.6761	5.4
2.89527	1.20807		1.4384	1.2
1.98669	0.332773		1.65905	38.4
2.34225	1.66828		1.14178	3.6
1.30364	2.39966		1.69609	3.6
1.19775	2.47842		1.44033	2.4
2.8709	36.7081		0.942758	0.6
1.81684	0.19294		2.16229	3.6
2.45043	1.01345		1.22994	2.4
1.86701	0.289685		0.800526	4.8
2.18187	0.704316		3.41743	0.6
3.70931	0.815268		2.52314	2.4
1.03902	2.35501		2.15583	1.2
1.83793	2.71987		1.09424	1.2
1.58074	0.22716		1.88764	0.6
1.26604	0.70134		1.14131	0.6
2.67684	1.72382		2.2175	6.6
2.08448	1.88677		1.89441	0.6
1.76504	1.07851		1.70135	1.2
2.9864	0.779322		0.815653	1.2
1.40621	0.182255		2.17028	1.2
2.30604	3.76714		0.909574	6
2.69498	0.299551		0.958554	2.4
2.00569	0.83484		1.46596	7.8
2.2054	0.440507		1.35476	1.2
1.61584	1.89274		1.60963	2.4
1.57764	1.40428		1.56144	4.2
1.35346	0.702714		1.26895	0.6
1.32279	0.691452		1.05155	6.6
1.74934	0.887064		1.13153	16.2
1.83648	0.63681		1.32067	1.2
1.21321	0.405001		1.35653	2.4
2.8163	3.7084		1.03684	4.2
1.83278	0.539644		1.21546	2.4
1.82275	0.472849		1.51421	1.2
1.17771	1.64589		0.530494	8.4
0.894077	1.22714		1.52444	3.6
2.10896	0.680676		2.02081	24.6
2.02906	1.56529		1.64324	6.6
1.03858	1.3249		1.25775	1.8
1.15498	1.00107		1.67934	12
2.35846	1.38265		1.48012	2.4
2.13184	0.937602		1.69092	7.8
1.84733	2.79739		1.81424	0.6
2.8335	1.04446		2.29973	3
1.43263	5.82946		2.30159	4.2
0.838628	0.910578		1.07943	6
1.00211	3.03707		1.43064	1.8
3.85608	0.603096		1.38721	3.6
1.26478	3.57459		0.95802	22.2
1.34438	15.2665		0.947716	1.2
2.52866	1.82125		1.29913	0.6
1.78906	1.39302		2.29667	4.8
0.709892	0.600018		1.61657	0
1.78641	1.29017		1.34173	0.6
2.38137	3.3424		1.11075	5.4
2.22802	1.49411		1.35481	1.2
0.712332	5.26937		1.04559	1.2
1.49614	1.01047		1.60187	0.6
1.29649	0.713472		1.11032	6.6
1.92674	1.67591		1.14027	1.2
1.45259	2.36582		1.30135	2.4
1.6033	1.8467		1.70177	2.4
2.45001	0.247867		1.34259	3.6
1.79744	0.309077		0.800392	10.8
1.67421	1.79077		1.15927	2.4
0.949639	1.73729		1.4484	3
1.51924	2.10175		1.14318	1.8
2.6426	1.54232		1.92121	8.4
1.19052	1.21522		1.00245	1.8
1.16094	2.90521		0.940954	5.4
1.23909	0.914718		0.749258	9
0.874073	1.36768		2.56822	5.4
1.15964	2.19894		1.90149	0.6
1.3617	0.992646		1.12294	1.8
2.36208	0.199604		1.53009	1.8
1.69849	2.63429		2.73945	2.4
2.3955	0.124496		1.71055	1.2
0.855543	0.519886		1.77657	4.2
2.36351	2.01097		2.14614	1.2
0.910913	1.62983		1.53128	3
1.15117	0.742602		0.724601	7.2
1.25825	3.86999		0.70916	8.4
2.55627	0.924864		2.05644	1.2
2.72832	0.731022		1.30081	8.4
2.25436	0.649188		1.4762	0.6
2.0826	1.6282		1.36864	0.6
2.25765	0.860868		1.53858	2.4
1.4652	37.6093		2.63876	0.6
0.881562	2.18683		1.08579	1.2
1.76738	0.978456		1.87131	3
1.04059	0.793482		1.36681	12
1.06571	25.8235		2.21467	12.6
2.84337	2.20992		2.45139	2.4
1.99859	0.334926		1.63424	1.2
2.34967	1.04455		1.60682	1.8
2.84925	1.30909		1.70049	1.2
1.15591	2.29843		1.40716	2.4
1.13176	2.41396		1.68513	4.2
3.11174	1.12717		1.07199	4.2
1.72775	1.16186		0.953418	1.2
1.75528	1.85933		1.48451	6
3.6355	0.619326		1.64934	0.6
1.1072	1.70711		1.49316	5.4
1.93419	0.436445		0.956223	1.8
1.59679	0.668844		2.13893	5.4
1.21036	2.06515		0.827873	3.6
2.70255	1.03366		3.33363	0.6
2.14629	0.836982		1.22483	1.2
1.68114	1.47224		2.23215	0.6
1.35846	0.939504		1.32159	3
2.25327	5.14724		1.79499	2.4
2.62064	0.564827		1.18483	0.6
1.997	0.504924		2.27819	4.8
2.14746	0.750828		1.71077	3.6
1.54146	2.48291		1.65148	2.4
1.24582	2.52059		0.794185	1.2
1.44434	2.06732		2.10813	1.2
1.33167	0.398984		0.861533	27
1.68589	0.825558		1.35875	36
1.25757	1.94759		1.64093	1.2
1.93549	3.07961		1.5041	1.2
1.21981	0.467768		1.29189	1.2
1.81887	1.84961		1.11959	6
2.87264	2.68124		1.38655	3
1.91714	1.74547		1.40421	3.6
1.15673	1.2975		1.0006	24.6
0.939777	0.644886		0.918952	1.8
2.07855	0.160703		1.1455	2.4
2.04522	3.37624		1.17793	13.8
1.00611	1.20807		1.43445	3.6
2.25508	1.11583		1.62917	22.8
1.766	2.16139		1.44718	1.8
2.73892	1.5486		1.81514	1.8
2.55258	2.15279		1.32734	2.4
1.00579	4.45563		1.62481	5.4
1.41301	0.599239		1.47936	1.8
0.85168	1.14923		1.72721	4.2
0.933311	1.73915		1.90735	6.6
3.97936	2.07743		2.28365	4.2
1.31959	13.4533		1.31798	4.2
2.53097	0.416734		1.03027	6
1.79807	1.00875		2.32267	1.2
0.746872	1.63453		1.31823	1.8
1.80506	0.885444		0.543965	5.4
2.40768	1.77685		1.34727	1.8
2.16621	1.97182		2.17849	8.4
0.755389	7.03524		1.51429	0.6
1.38261	2.65962		1.32406	0.6
1.31026	3.11876		1.34461	0.6
1.1723	0.355042		1.13093	2.4
1.92616	2.02378		1.05527	6
1.4193	1.16487		1.51711	0.6
1.46244	2.77935		1.12894	7.8
2.33974	0.974664		1.07678	1.2
1.74134	1.16214		1.42364	3
1.5141	1.05101		1.65639	4.8
0.943587	1.37593		1.26707	4.2
1.55161	0.57863		1.16004	21.6
0.885523	1.97581		1.55139	19.8
1.07797	0.672246		0.903019	12
1.27181	1.5767		1.12025	0.6
2.33673	1.27603		2.08835	6
2.7336	0.62814		1.049	1.2
2.51822	2.11628		0.912657	13.8
1.21783	0.835362		0.807599	12.6
1.14306	3.41075		2.54405	1.8
1.11968	1.33076		1.8248	1.2
0.847994	1.31177		1.2465	3
1.16057	0.858648		1.54908	2.4
1.37169	1.58954		2.50157	2.4
2.60319	1.55881		1.63313	3.6
2.18069	0.143646		1.90847	3
1.32984	0.643146		2.11617	0.6
2.14008	0.87		1.12553	27.6
1.57446	0.782928		0.777842	6.6
2.23711	0.617976		2.21397	0.6
0.847298	0.512602		1.32096	34.2
2.17796	1.29575		1.69332	1.2
2.31973	1.07395		1.46233	2.4
1.931	0.789066		1.60434	0.6
2.34348	0.949836		2.02646	4.8
1.47431	1.59488		2.46693	3
0.853252	2.92546		1.06966	2.4
1.62942	0.57529		1.78052	5.4
0.986805	0.592684		0.451454	3.6
1.6217	1.74382		1.33232	17.4
2.86989	1.49216		2.18378	2.4
1.13786	3.18855		2.45739	3.6
1.11343	2.68541		1.61374	4.8
2.88508	34.5187		1.58723	4.8
1.63486	0.708186		1.67244	9
1.27915	1.0985		1.41492	4.2
1.65296	1.12144		1.61704	4.2
1.86414	0.813738		1.11746	4.8
2.1381	2.49031		1.01342	28.2
3.44219	1.1324		1.47943	6
1.04659	3.77414		1.63798	2.4
1.77026	4.2813		1.41049	4.8
1.67678	1.15508		0.962017	3.6
1.17824	1.63522		2.20488	2.4
2.55005	0.536897		0.819885	5.4
1.9046	0.518253		3.33799	3.6
1.98537	1.48429		1.26387	3.6
1.05097	0.740466		1.32448	2.4
1.37722	4.29505		1.8097	4.2
2.14566	0.76641		1.09085	3.6
2.41497	1.05927		2.13123	9
1.99118	2.17998		1.54769	6
2.09119	0.467996		1.73893	3
1.5087	1.98243		0.814513	3
1.22494	1.51679		2.11407	6
1.44045	2.59684		0.586151	4.2
3.7354	0.329397		0.951426	2.4
1.22805	5.03077		1.65883	13.8
1.82755	1.26093		1.68619	4.2
1.18673	0.025983		1.18135	3
1.81997	0.731016		1.51736	3
2.69761	3.83478		1.25753	4.2
1.76014	0.755838		1.10142	15.6
1.14466	1.02486		1.13762	22.2
0.894486	1.06334		1.35512	3.6
2.08981	1.0408		0.557441	21
1.29115	1.0526		0.982354	16.8
1.1187	1.48992		0.930935	3
2.26247	1.52903		1.2131	4.2
1.74341	1.30891		1.65478	11.4
2.12582	0.153418		1.28349	3
2.5765	1.51733		1.64253	6
1.44778	1.15157		1.34545	4.8
0.842587	1.19676		1.47877	3
1.00371	2.16407		1.71392	4.2
2.52493	2.10081		1.64659	3.6
1.75826	0.37822		2.29073	1.8
0.675169	1.63392		2.15408	4.8
1.70349	3.6673		1.03248	8.4
2.21433	0.594887		1.36509	12.6
2.20305	2.48813		1.23712	2.4
0.750982	6.36954		1.21313	7.2
1.51713	1.29825		1.46081	3
1.90397	0.838764		2.23137	3.6
1.426	1.05746		1.26987	4.8
1.55299	0.99		1.56306	3
2.30847	0.62799		1.10617	2.4
1.71379	0.699954		1.35244	3.6
1.4381	1.51987		1.01882	6.6
0.934659	0.551972		1.15051	9
1.54554	1.4043		1.45898	1.8
1.19806	8.0964		1.09802	4.8
2.70343	2.91091		1.3054	1.8
2.52024	2.84801		1.52604	16.2
1.18729	0.938118		1.23964	2.4
1.11617	4.23389		1.14614	32.4
1.16079	3.76967		0.873992	17.4
[truncated: 4,066 more rows]

## Sheet: Figure 6F
Calcium	WT			KO
0.5	2.476	0.5694	12	2.603	0.4928	77
1	3.255	0.1426	1641	5.451	0.2012	1133
1.5	2.801	0.1375	1815	4.351	0.1235	2661
2	2.18	0.133	1045	3.888	0.1622	1400
2.5	1.788	0.1347	678	3.74	0.2778	532
3	3.066	0.3097	414	2.824	0.4253	160
3.5	3.314	0.6486	164	2.441	0.3369	73
4	1.525	0.3012	67	1.896	0.2953	25
4.5	1.012	0.1451	15	2	0.2	2
Compare each cell mean with the other cell mean in that row
Number of families	1
Number of comparisons per family	9
Alpha	0.05
Šídák's multiple comparisons test	Predicted (LS) mean diff.	95.00% CI of diff.	Below threshold?	Summary	Adjusted P Value
WT - KO
Row 1	-0.127	-5.183 to 4.929	No	ns	>0.9999
Row 2	-2.196	-2.825 to -1.567	Yes	****	<0.0001
Row 3	-1.55	-2.046 to -1.054	Yes	****	<0.0001
Row 4	-1.708	-2.374 to -1.042	Yes	****	<0.0001
Row 5	-1.952	-2.895 to -1.009	Yes	****	<0.0001
Row 6	0.242	-1.274 to 1.758	No	ns	>0.9999
Row 7	0.873	-1.419 to 3.165	No	ns	0.9554
Row 8	-0.371	-4.189 to 3.447	No	ns	>0.9999
Row 9	-0.988	-13.25 to 11.27	No	ns	>0.9999
Test details	Predicted (LS) mean 1	Predicted (LS) mean 2	Predicted (LS) mean diff.	SE of diff.	N1	N2	t	DF
WT - KO
Row 1	2.476	2.603	-0.127	1.828	12	77	0.06949	11896
Row 2	3.255	5.451	-2.196	0.2275	1641	1133	9.654	11896
Row 3	2.801	4.351	-1.55	0.1793	1815	2661	8.646	11896
Row 4	2.18	3.888	-1.708	0.2408	1045	1400	7.094	11896
Row 5	1.788	3.74	-1.952	0.3411	678	532	5.723	11896
Row 6	3.066	2.824	0.242	0.5482	414	160	0.4414	11896
Row 7	3.314	2.441	0.873	0.8286	164	73	1.054	11896
Row 8	1.525	1.896	-0.371	1.38	67	25	0.2688	11896
Row 9	1.012	2	-0.988	4.433	15	2	0.2229	11896

## Sheet: Figure 6G
WT cells
Calcium Ratio	0.3-0.5	0.5-1.0	1.0-1.5	1.5-2.0	2.0-2.5	2.5-3.0	3.0-3.5	3.5-4.0	4.0-4.5
Mean Speed	16.6667	12.858	8.20937	5.35885	3.53982	10.1449	9.14634	2.98508	0
KO cells
Calcium Ratio	0.3-0.5	0.5-1.0	1.0-1.5	1.5-2.0	2.0-2.5	2.5-3.0	3.0-3.5	3.5-4.0	4.0-4.5
Mean Speed	12.987	32.8332	19.0154	16.3571	15.2256	10.625	4.10959	4	0

## Sheet: Figure 6 Supp 1 A
Time(min)	GCamp Intensity			TdTomato Intensity			Displacement Length
0.05	49.8929	9.15508	64	91.5851	15.9939	64	1.53088	2.55395	62
0.1	50.1112	9.72134	62	91.2872	14.4833	62	1.25927	2.13135	68
0.15	51.2475	10.8647	68	92.4095	15.5306	68	1.33234	1.89068	67
0.2	51.8329	13.1019	67	93.3437	16.1209	67	1.59317	1.86499	67
0.25	51.4641	9.08865	67	95.0711	15.3366	67	1.64767	1.6187	66
0.3	51.0544	9.26995	66	94.9049	16.6694	66	1.81623	1.80134	66
0.35	50.9482	9.88415	66	93.4487	17.1865	66	2.31635	2.20218	66
0.4	53.1435	17.314	66	93.0179	15.9744	66	2.42961	2.04459	67
0.45	53.0916	17.7455	67	92.5372	16.0711	67	2.44481	2.12349	67
0.5	57.3768	33.4624	67	93.7852	16.5926	67	2.6648	2.16901	66
0.55	52.8624	19.2784	66	93.2588	16.069	66	3.16217	2.34984	69
0.6	124.256	84.9238	69	95.9891	18.286	69	3.50785	2.7441	74
0.65	310.805	125.538	74	95.7458	18.1071	74	3.17783	2.29485	70
0.7	259.368	107.471	70	95.3537	18.4991	70	3.49789	2.6798	69
0.75	180.349	74.6565	69	95.0476	17.494	69	3.71017	2.93224	72
0.8	146.43	59.2932	72	95.2145	17.3222	72	3.883	2.93458	68
0.85	134.015	51.8965	68	96.4641	17.5436	68	4.07476	3.31909	72
0.9	129.175	46.2609	72	95.366	16.7151	72	4.15538	3.40179	71
0.95	136.539	50.3284	71	98.7331	17.4972	71	4.39935	3.6774	70
1	137.188	49.7422	70	99.5347	18.4215	70	4.37059	3.61976	72
1.05	143.367	53.4953	72	99.5416	17.8096	72	4.23969	3.33019	72
1.1	148.947	55.723	72	99.7638	17.8161	72	4.08654	3.07206	70
1.15	152.81	57.7225	70	99.2831	17.0802	70	4.40742	3.60918	75
1.2	156.803	63.6767	75	97.5346	17.8048	75	4.22074	3.40243	74
1.25	162.599	65.951	74	97.5307	17.2753	74	4.11934	3.25139	71
1.3	171.336	66.9685	71	99.2032	15.8303	71	4.35891	3.26308	72
1.35	178.612	71.4871	72	100.423	16.917	72	4.55634	3.55563	75
1.4	181.033	74.9025	75	99.3754	17.7765	75	4.66948	3.52541	74
1.45	185.787	75.1618	74	97.5295	16.8468	74	4.35489	3.18056	75
1.5	187.38	75.5391	75	98.6599	17.3507	75	4.45154	3.16192	74
1.55	193.694	77.0449	74	97.2528	16.2024	74	4.26824	3.14044	76
1.6	196.062	81.2122	76	96.1312	17.0529	76	4.3857	3.14501	75
1.65	200.516	78.5945	75	95.956	16.2802	75	4.45087	3.18305	77
1.7	198.665	80.5398	77	95.3122	16.6808	77	4.21462	2.88584	75
1.75	202.606	80.9092	75	96.0809	16.6854	75	4.78302	3.33338	75
1.8	207.074	82.9939	75	95.4066	16.1457	75	4.24097	3.02158	74
1.85	205.186	81.474	74	94.9147	16.5626	74	4.33967	2.9223	76
1.9	210.583	81.4712	76	95.9135	16.7317	76	4.48791	2.9484	74
1.95	214.574	82.9344	74	97.1092	17.045	74	4.44773	3.05091	74
2	215.389	81.0354	74	94.9909	15.9001	74	4.79983	3.06498	79
2.05	214.702	87.3468	79	94.9573	16.941	79	4.54582	3.25686	76
2.1	220.896	84.7408	76	95.0383	17.1455	76	4.57833	3.0222	75
2.15	219.518	84.4289	75	94.4411	16.2685	75	4.65778	3.09806	78
2.2	220.229	83.022	78	95.303	16.6216	78	4.46389	3.14157	73
2.25	226.296	77.9457	73	96.4065	15.8393	73	4.83736	3.15279	77
2.3	223.23	81.1409	77	94.8997	16.3764	77	4.99203	3.16903	78
2.35	221.538	84.0013	78	94.7175	16.3816	78	4.94317	3.05646	77
2.4	222.346	82.4463	77	93.533	15.6862	77	4.84219	3.08077	76
2.45	227.343	80.8168	76	95.306	15.4235	76	5.10052	3.16234	78
2.5	225.741	82.6436	78	93.9435	16.3307	78	5.23009	3.12046	76
2.55	227.569	84.5864	76	93.5878	15.5901	76	5.28036	3.26206	76
2.6	229.456	85.1823	76	94.6362	15.2803	76	5.25714	3.19725	78
2.65	230.307	88.0738	78	93.2686	16.2644	78	5.38966	3.19247	75
2.7	231.517	85.364	75	93.8761	15.2763	75	5.38951	3.30299	77
2.75	227.28	85.8906	77	93.5987	15.7615	77	5.73064	3.30038	74
2.8	226.873	83.7856	74	94.088	15.2094	74	5.68939	3.31034	74
2.85	233.135	84.0153	74	93.272	15.1712	74	5.78877	3.34097	78
2.9	227.722	82.0508	78	91.6234	15.7425	78	5.88588	3.55622	74
2.95	233.838	81.6448	74	92.6271	14.38	74	5.90426	3.49537	78
3	230.765	83.7903	78	91.9655	15.496	78	5.77994	3.59981	76
3.05	231.768	82.1732	76	92.3162	15.1434	76	6.0157	3.48561	75
3.1	235.55	80.8587	75	92.8032	14.8911	75	6.18715	3.60188	76
3.15	232.274	87.1208	76	91.0128	16.0717	76	6.08511	3.64551	76
3.2	239.127	86.2327	76	91.6583	15.1391	76	6.32421	3.72596	78
3.25	237.971	88.1473	78	90.8922	15.5435	78	6.38101	3.76132	77
3.3	236.444	86.5907	77	90.4473	15.2764	77	6.58565	3.88656	78
3.35	240.013	88.3257	78	91.5011	15.6187	78	6.59906	3.9072	79
3.4	240.153	84.219	79	92.118	15.5288	79	6.73385	3.96093	77
3.45	238.402	84.0057	77	92.7063	15.1805	77	6.94649	3.87582	77
3.5	239.035	85.5825	77	92.2621	15.6168	77	7.02346	4.18092	77
3.55	241.739	81.7506	77	90.9248	15.3708	77	6.96774	4.13183	74
3.6	243.413	83.696	74	91.1537	15.6125	74	7.18963	4.21673	76
3.65	244.237	84.8991	76	91.6255	15.3555	76	7.55451	4.37118	74
3.7	241.209	79.1336	74	92.04	15.1661	74	7.53912	4.22225	75
3.75	237.207	75.9727	75	91.4348	15.2053	75	7.63685	4.45014	74
3.8	238.956	79.6848	74	91.3276	15.2307	74	7.63009	4.35723	75
3.85	238.123	80.4063	75	92.1326	15.7301	75	7.77506	4.56278	75
3.9	241.964	78.2672	75	92.1678	15.8924	75	7.87651	4.75712	75
3.95	239.225	79.3733	75	91.4043	15.9819	75	7.6492	4.7751	75
4	237.477	81.6845	75	90.6676	15.8461	75	7.78003	4.89758	78
4.05	239.533	82.4555	78	91.079	16.3207	78	8.06883	4.92075	75
4.1	239.099	80.4943	75	91.4062	16.1144	75	8.13326	4.91292	74
4.15	239.115	80.3337	74	91.7415	15.6541	74	8.13932	4.93442	76
4.2	238.602	82.1027	76	91.0115	15.8879	76	8.37367	5.08551	74
4.25	237.33	80.4532	74	92.6873	15.3721	74	8.5549	5.11855	75
4.3	232.688	81.1183	75	92.1671	15.6478	75	8.8078	5.28942	74
4.35	233.647	80.5503	74	91.3487	15.3282	74	8.48348	5.04517	78
4.4	230.742	80.8676	78	89.9408	15.5234	78	8.5506	5.22791	77
4.45	232.585	80.3874	77	90.9595	16.0927	77	8.79011	5.16318	75
4.5	230.605	82.2599	75	91.4706	15.4208	75	8.92057	5.47194	73
4.55	231.076	85.177	73	91.9324	15.9805	73	9.11486	5.45045	74
4.6	228.928	78.3935	74	92.477	15.1865	74	8.96743	5.43877	74
4.65	228.353	82.0601	74	91.1921	15.0357	74	9.09235	5.27977	72
4.7	231.553	83.0264	72	91.1198	15.4555	72	8.94958	5.54463	72
4.75	235.505	80.2453	72	91.4799	15.0874	72	9.2112	5.66711	73
4.8	228.872	85.0824	73	90.8899	15.7525	73	9.72051	5.8754	74
4.85	226.442	83.0373	74	91.0733	15.2125	74	9.581	6.12376	73
4.9	226.194	86.7302	73	90.138	15.1484	73	9.32774	6.16424	75
4.95	224.908	84.8397	75	90.0287	14.94	75	9.67925	6.06997	71
5	228.424	86.5637	71	89.7363	15.1681	71

## Sheet: Figure 6 Supp 1 B
Time(min)	GCamp Intensity			TdTomato Intensity			Displacement Length
	Mean	SEM	N	Mean	SEM	N	Mean	SEM	N
0.25	43.26	12.68	52	100.01	17.97	54	0	0	52
0.5	40.77	6.45	54	99.18	17.33	56	1	1.58	54
0.75	43.23	13.81	56	98.3	18.1	55	1.27	2.11	56
1	41.77	9.44	55	98.95	18.42	55	1.48	2.16	55
1.25	41.09	7.27	55	98.88	19.34	55	1.58	2.14	55
1.5	41.27	8.2	55	97.76	17.87	54	1.52	1.72	55
1.75	41.71	8.85	54	96.62	19.42	54	1.96	2.38	54
2	42.2	9.39	54	100.02	20.17	56	1.91	2.03	54
2.25	42.41	7.96	56	98	19.89	56	2.08	2.4	56
2.5	43.37	7.15	56	97.04	19.92	57	2.34	2.64	56
2.75	42.24	7.67	57	96.74	17.65	52	2.49	2.84	57
3	150.62	81.18	52	95.4	18.45	53	3.28	3.47	52
3.25	79.34	42.45	53	94.29	18.22	54	3.17	2.96	53
3.5	67.74	42.59	54	95.55	18.4	55	3.66	3.27	54
3.75	65.31	38.01	55	94.45	17.86	56	4.53	3.55	55
4	62.08	30.51	56	95.58	17.28	54	4.14	3.41	56
4.25	61.14	32.97	54	95.35	17.3	56	4.84	3.71	54
4.5	62.56	30.45	56	91.9	16.6	60	4.99	3.86	56
4.75	62.02	30.79	60	93.08	16.23	60	5.12	3.9	60
5	59.99	25.05	60	94.69	16.88	55	5.08	3.73	60
5.25	63.99	33.61	55	94.64	17.32	57	5.22	4.02	55
5.5	61.51	25.99	57	97.3	17.56	59	5.41	4.23	57
5.75	61.33	23.8	59	96.12	16.32	60	5.9	4.46	59
6	64.91	30	60	95.22	16.22	58	5.95	4.49	60
6.25	61.62	23.31	58	94.11	16.73	60	6.15	4.75	58
6.5	62.03	26.64	60	94.71	16.26	61	6.29	4.49	60
6.75	65.61	31.53	61	93.91	16.92	60	6.38	4.7	61
7	61.85	22.5	60	93.44	16.36	63	6.62	4.76	60
7.25	65.23	27.15	63	93.41	16.15	66	6.67	4.94	63
7.5	62.73	24.87	66	96.74	16.41	60	7.09	5.48	66
7.75	65.93	22.97	60	94.7	16.4	61	6.99	5.46	60
8	64.85	29.2	61	95.86	16.18	63	7.04	5.49	61
8.25	67.2	24.39	63	96.15	16.88	62	7.16	5.56	63
8.5	66.18	26.02	62	96.16	16.36	62	7.5	5.64	62
8.75	67.64	25.77	62	94.2	16.6	62	7.81	5.69	62
9	65.87	29.41	62	95.75	16.9	61	7.87	5.67	62
9.25	66.56	28.46	61	94.05	17.58	64	7.72	5.94	61
9.5	67.73	29.52	64	94.43	17.39	62	8	5.9	64
9.75	65	26.11	62	93.83	17.16	64	8.27	6.18	62
10	65.8	27.38	64	94.06	18.01	63	8.51	6.18	64
10.25	63.61	24.34	63	92.77	18.04	65	8.71	6.3	63
10.5	61.83	26.03	65	94.66	17.4	62	8.79	6.39	65
10.75	65.56	26.51	62	94.51	18.57	62	9.27	6.51	62
11	67.82	24.47	62	91.71	17.75	62	9.46	6.66	62
11.25	64.07	23	62	90.86	16.67	62	9.6	6.73	62
11.5	61.49	18.76	62	92.56	16.64	61	9.81	6.63	62
11.75	60.37	19.74	61	93.33	17.28	64	9.81	7.02	61
12	62.31	19.81	64	94.51	17.79	61	9.9	7.28	64
12.25	64.37	20.56	61	93.95	17.65	63	10.29	7.41	61
12.5	61.67	19.97	63	94.13	17.32	60	10.13	7.58	63
12.75	62.04	21.13	60	91.22	17.08	64	10.77	7.76	60
13	59.86	19.18	64	91.99	17.48	62	10.82	7.83	64
13.25	60.3	19.62	62	92.19	17.14	61	11.35	7.94	62
13.5	63.1	20.37	61	93.97	16.48	61	11.03	8.23	61
13.75	61.06	20.15	61	94.03	16.75	62	11.24	8.32	61
14	61.18	18.44	62	93.22	17.93	61	10.99	8.67	62
14.25	61.45	17.88	61	93.2	18.39	63	11.17	8.59	61
14.5	58.14	18.34	63	91.66	18.6	63	11.75	8.7	63
14.75	60.4	19.98	63	92.88	17.97	64	12.36	9.05	63
15	62	19.78	64	91.65	18.34	66	12.2	9.54	64
15.25	60.66	20.18	66	91.11	17.64	67	12.32	9.65	66
15.5	56.56	16.1	67	92.63	17.4	61	12.37	9.67	67
15.75	59.83	16.34	61	91.78	17.24	63	12.76	9.93	61
16	58.47	16.55	63	93.03	17.74	61	12.75	10.25	63
16.25	59.64	18.05	61	92.4	17.16	62	13.11	10.51	61
16.5	59.41	19.21	62	93.39	16.12	60	13.42	10.79	62
16.75	57.1	16.95	60	91.97	17.09	65	13.67	11.2	60
17	57.59	14.63	65	91.32	16.17	63	13.47	10.92	65
17.25	56.55	15.15	63	93.45	16.76	60	14.51	11.76	63
17.5	57.08	16.42	60	92.09	16.71	62	14.02	11.74	60
17.75	60.96	19.99	62	92.18	16.64	61	14.45	12.26	62
18	58.53	18.12	61	90.93	16.78	62	14.87	12.68	61
18.25	59.8	20	62	92.79	17.12	59	13.69	12.25	62
18.5	57.26	15.57	59	91.5	16.26	59	14.2	12.43	59
18.75	56.82	13.49	59	91.23	15.77	61	14.95	12.83	59
19	59.08	15.94	61	93.3	16.95	62	14.78	12.56	61
19.25	57.36	17.8	62	91.9	16.34	62	15.24	12.92	62
19.5	56.19	15.25	62	90.64	16.42	62	15.42	13.12	62
19.75	57.04	15.73	62	89.41	17.57	62	15.11	12.54	62
20	56.37	15.29	62	90.77	17.72	61	15.42	12.97	62
20.25	55.25	16.74	61	90.87	16.89	63	15.01	12.9	61
20.5	56.78	18.12	63	90.48	16.65	60	16.05	13.2	63
20.75	56.41	17.34	60	90.29	16.41	57	16.27	13.55	60
21	57.94	16.29	57	89.61	17.03	62	16.78	13.56	57
21.25	56.39	16.52	62	89.95	16.57	64	16.6	13.43	62
21.5	54.97	17.27	64	90.77	16.34	61	16.44	13.73	64
21.75	54.31	14.61	61	89.16	16.1	61	16.8	13.62	61
22	54.84	14.33	61	87.93	16.42	61	17.32	14.18	61
22.25	52.52	13.28	61	88.15	15.82	61	17.46	14.14	61
22.5	53.55	12.68	61	89.03	16.16	62	17.5	14.36	61
22.75	54.55	14.81	62	87.82	16.13	60	17.65	14.67	62
23	53.53	13.79	60	88.96	16.4	61	16.99	14.45	60
23.25	53.06	14.56	61	87.94	15.23	61	17.61	15.28	61
23.5	52.59	13.3	61	88.22	15.84	62	17.72	15.54	61
23.75	53.4	16.11	62	89.46	15.75	61	17.39	15.57	62
24	53.85	16.05	61	88.42	15.94	62	18	15.8	61
24.25	50.86	12.71	62	88.66	16.19	61	17.96	15.43	62
24.5	53.52	14.93	61	88.95	15.85	60	18.5	15.76	61
24.75	54.02	14.93	60	88.85	15.28	63	19.04	15.95	60
25	55.27	14.75	63	88.79	16.02	62	18.26	16.06	63
25.25	52.7	12.16	62	88.73	15.86	59	18.8	16.06	62
25.5	54	14.97	59	87.03	16.35	59	19.25	16.29	59
25.75	55.14	16.11	59	88.8	16.04	62	19.32	16.65	59
26	51.74	14.48	62	88.93	14.9	62	19.07	16.66	62
26.25	54.63	16.55	62	87.49	15.47	61	19.39	16.33	62
26.5	52.95	14.91	61	85.18	15.22	61	19.28	16.6	61
26.75	52.87	12.79	61	86.06	14.57	60	20.6	17.43	61
27	53.3	13.85	60	86.79	15.43	59	19.84	17.03	60
27.25	52.12	14.67	59	86.46	15.56	60	19.42	16.72	59
27.5	50.81	12.43	60	87.07	14.73	57	19.72	17.47	60
27.75	50.09	14.54	57	87.06	15.58	58	19.34	17.23	57
28	51.75	12.35	58	86.22	14.46	59	20.31	17.99	58
28.25	51.19	12.84	59	88.08	15.41	56	20.72	18.05	59
28.5	55.39	16.26	56	88.88	14.86	58	20.21	17.97	56
28.75	53.22	15.27	58	87.18	15.35	62	20.5	17.74	58
29	52.22	16.16	62	87.96	14.7	55	20.84	18.41	62
29.25	52.72	13.52	55	87.46	15.06	56	19.85	17.45	55
29.5	51.08	12.96	56	86.81	14.58	57	21.69	18.52	56
29.75	50.73	11.01	57	86.65	14.24	56	20.36	18.76	57
30	53.86	14.78	56	87.08	15.29	56	21.05	18.93	56
30.25	52.83	13.41	56	86.85	14.42	56	20.95	19.11	56
30.5	52.67	15.82	56	87.66	15.63	55	19.69	17.94	56
30.75	51.38	12.83	55	86.45	14.87	57	21.65	20.03	55
31	51.35	14.55	57	87.24	15.24	54	21.3	19.87	57
31.25	50.53	12.22	54	88.88	14.41	52	21.92	20.26	54
31.5	51.02	10.49	52	88.86	15.09	53	22.21	20.56	52
31.75	52.48	13.79	53	89.73	14.56	52	20.97	19.53	53
32	52.02	11.33	52	89.14	15.05	54	20.51	19.46	52
32.25	51.17	16.58	54	88.59	15.21	55	21.25	20.18	54
32.5	53.93	18.44	55	88.1	14.92	55	21.1	20.22	55
32.75	50.16	12.55	55	88	14.82	55	21.14	18.98	55
33	52.34	13.24	55	87.96	15.12	53	22.24	19.65	55
33.25	51.7	14.15	53	88.63	14.34	52	21.14	19.1	53
33.5	51.66	14.6	52	87.24	14.4	56	21.68	19.26	52
33.75	48.35	9.9	56	90.12	14.21	52	21.1	19.87	56

## Sheet: Figure 6 Supp 2 Panel A
	Fig 6-fig supp 2A							Fig 6-fig supp 2A							Fig 6-fig supp 2A							Fig 6-fig supp 2A
	Calcium							Speed							Displacement							Straightness
	8_WT_0.2Ca_TG_ADP	7_KO_0.2Ca_TG_ADP	6_WT_2Ca_TG_ADP	5_KO_2Ca_TG_ADP				4_WT_0.2Ca_TG	3_KO_0.2Ca_TG	2_WT_2Ca_TG	1_KO_2Ca_TG				8_WT_0.2Ca_TG_ADP	7_KO_0.2Ca_TG_ADP	6_WT_2Ca_TG_ADP	5_KO_2Ca_TG_ADP				8_WT_0.2Ca_TG_ADP	7_KO_0.2Ca_TG_ADP	6_WT_2Ca_TG_ADP	5_KO_2Ca_TG_ADP
	0.810667	2.29286	0.813194	3.01216				2.4	2.4	6.6	1.8				25.087	12.5904	23.0965	7.8431				0.02	0.21	0.13	0.32
	3.02179	1.33476	2.10179	3.51379				7.2	15.6	9.6	7.2				32.8354	16.764	22.6007	0.782822				0.31	0.15	0.2	0.07
	1.64009	1.48807	3.77229	4.05272				6	10.8	4.8	3				10.057	12.8094	22.9483	20.4832				0.56	0.11	0.12	0.01
	1.57952	3.42425	2.40356	3.12153				2.4	3.6	5.4	5.4				27.132	18.6258	31.3209	10.0226				0.1	0.08	0.29	0.63
	2.04251	1.26849	2.79574	3.77499				6	4.2	4.8	4.8				1.46554	17.3342	17.2933	3.78279				0.22	0.17	0.16	0.14
	0.820013	0.973677	5.00599	3.74563				10.2	4.8	7.8	6				8.16426	14.356	21.246	35.95				0.04	0.22	0.13	0.06
	2.28757	2.13822	2.9694	3.79799				4.2	4.8	4.2	7.2				4.12197	5.76567	4.25908	13.5267				0.16	0.11	0.3	0.48
	1.16623	2.84423	3.3768	3.06412				15.6	3	1.8	9				16.6223	28.66	36.7934	15.6488				0.05	0.11	0.08	0.16
	0.961292	1.35947	1.47744	3.71586				16.8	9.6	3	12.6				10.3838	8.82986	25.4963	7.72467				0.32	0.29	0.19	0.24
	1.2095	2.71482	3.24386	3.38693				4.2	7.8	21	4.2				1.90427	7.61534	21.5235	14.3939				0.16	0.08	0.33	0.08
	0.717656	2.45526	2.9481	2.64581				7.2	7.2	13.8	6.6				10.5578	10.5499	9.98108	13.7485				0.18	0.09	0.24	0.17
	1.71602	1.74795	4.54969	3.15977				11.4	4.8	4.2	18.6				19.2097	10.1373	22.8767	9.25982				0.2	0.13	0.1	0.2
	0.857494	3.37681	3.75486	2.7752				2.4	4.8	15.6	2.4				9.28788	26.3141	51.6961	4.70722				0.26	0.1	0.32	0.31
	2.6333	1.58788	3.86395	3.37806				8.4	3	4.8	1.8				63.3463	3.51175	11.7036	19.4937				0.09	0.56	0.49	0.03
	2.53599	3.24865	3.68936	3.59551				5.4	10.2	5.4	10.8				18.5308	22.1612	6.66881	9.19003				0.62	0.06	0.13	0.18
	1.50141	4.24436	4.62237	1.5365				6	5.4	4.2	2.4				16.8464	2.32396	26.635	0.979176				0.14	0.11	0.07	0.25
	2.45638	3.429	3.2312	3.32572				1.8	6	10.8	4.2				0.511116	7.31677	8.0925	7.5275				0.13	0.11	0.29	0.03
	2.14115	2.43816	4.59828	1.55907				3.6	2.4	1.8	18				0.33996	16.704	17.0828	7.48154				0.02	0.09	0.07	0.08
	0.925132	1.67486	4.24663	1.7383				3	9	4.2	3				13.2464	18.8243	15.5235	11.1202				0.02	0.23	0.18	0.11
	2.27724	3.29893	4.69884	4.21728				1.8	2.4	2.4	10.2				22.2152	15.6865	34.5846	28.2778				0.18	0.2	0.13	0.15
	2.43361	1.80028	3.89373	3.25176				3	6.6	2.4	9.6				0.668498	6.10918	5.60535	24.3956				0.17	0.2	0.28	0.48
	2.39596	1.3596	3.06882	2.26233				10.8	13.2	5.4	6				0.358492	16.6534	19.2478	11.534				0.04	0.07	0.05	0.22
	1.68994	2.94378	2.93522	4.16515				6.6	5.4	4.2	6.6				2.88256	4.53986	18.3071	11.2751				0.02	0.15	0.46	0.14
	2.77968	2.87735	4.48201	2.62601				10.2	3.6	2.4	8.4				22.3915	5.84153	7.5803	13.8131				0.05	0.04	0.2	0.13
	2.14651	1.84678	3.49957	4.11496				2.4	1.8	3	15.6				22.952	52.5273	16.5072	21.1917				0.26	0.05	0.06	0.21
	2.10778	3.57214	2.95214	2.67313				6	15	1.8	11.4				17.7822	16.4811	17.1065	20.0726				0.16	0.58	0.16	0.17
	0.992482	1.6372	3.30024	3.05257				1.2	8.4	3	5.4				20.922	13.5019	7.81282	4.81702				0.24	0.32	0.46	0.21
	1.81779	2.03813	2.91181	2.91527				5.4	3.6	4.8	5.4				10.724	15.2528	27.8879	14.9846				0.32	0.16	0.04	0.04
	2.7061	3.00378	2.45003	2.19376				2.4	4.8	9	4.2				4.13363	14.479	18.8696	14.4226				0.13	0.43	0.27	0.17
	2.16444	2.94657	2.98418	2.96469				1.8	8.4	5.4	6				17.7781	11.8991	13.4079	6.01652				0.07	0.31	0.23	0.2
	2.6151	1.28436	3.06876	3.34241				1.8	7.2	19.8	3.6				22.5985	40.0889	5.28314	5.5998				0.28	0.18	0.15	0.14
	1.36195	2.29137	3.17478	2.92431				3	7.8	3	16.2				22.7029	23.8726	14.399	10.3309				0.19	0.6	0.04	0.12
	1.1305	2.32893	4.60821	2.57835				5.4	9.6	3	4.2				26.4857	27.8278	6.46087	17.4496				0.35	0.18	0.33	0.06
	1.53899	0.893363	4.05623	2.98575				12	18	15.6	10.2				16.5955	11.1443	10.9203	2.00422				0.16	0.25	0.07	0.45
	3.6936	1.98678	3.6128	3.46449				1.8	6.6	4.8	9.6				1.06848	10.4869	20.024	36.3988				0.39	0.19	0.16	0.08
	1.25057	1.48597	4.1812	3.32179				6.6	4.8	4.8	13.2				0.687116	28.2382	16.157	21.662				0.04		0.12	0.67
	1.00658	2.51366	3.52006	2.70647				3	8.4	9.6	7.8				0.197964	9.81069	7.85861	20.385				0	0.24	0.26	0.19
	0.426244	1.86752	4.3487	2.41512				9	12.6	1.8	10.2				20.3115	11.6238	37.1776	5.30412				0.01	0.19	0.09	0.45
	1.61279	2.36548	4.07482	4.08556				1.8	15.6	9.6	3.6				46.039	11.0101	4.66897	56.7902				0.24	0.13	0.55	0.07
	0.959057	1.83042	3.49703	4.29288				1.8	9	3.6	7.2				18.9758	12.4489	7.5446	0.302805				0.22	0.43	0.03	1
	3.2899	3.85202	3.58141	3.85493				3	15	1.8	18.6				1.77201	8.91756	4.05789	22.5041				0.27	0.21	0.03	0.02
	1.89793	2.97134	2.63036	4.46787				4.8	6	2.4	14.4				1.43371	6.65029	22.6559	15.0053				0.01		0.03	0.23
	2.70914	2.95782	4.16409	3.60688				3	5.4	3.6	1.8				32.575	32.8776	18.8316	19.2826				0.05	0.16	0.59	0.25
	1.9659	2.42795	3.85556	3.71083				4.2	7.2	2.4	4.2				22.5892	13.6909	12.1248	5.60645				0.28	0.57	0.32	0.21
	1.89164	1.71908	2.61269	3.72587				2.4	9.6	6.6	4.8				17.1322	12.2148	1.29382	18.079				0.29	0.16	0.17	0.12
	1.55518	2.3887	3.83519	4.05871				4.2	9	1.8	4.8				5.31787	21.2252	3.70464	10.6004				0.17	0.13	0.06	0.23
	1.84259	1.83713	1.2497	3.14917				15.6	5.4	4.8	4.8				1.01194	52.0791	18.5534	8.81532				0.05	0.32	0.04	0.15
	3.12637	2.86089	2.77607	3.56336				10.2	12	6	6.6				7.30911	3.69047	8.84836	29.495				0.02	0.45	0.23	0.08
	1.2577	1.66676	3.62125	2.29887				4.8	4.8	4.8	3				3.69727	6.86706	8.12572	14.706				0.18	0.05	0.17	0.42
	2.15503	2.36111	3.77614	4.54639				1.8	3	4.2	1.8				11.5028	18.7108	21.5762	0.924498				0.09		0.12	0.27
	1.71703	1.51532	2.14652	4.28949				3.6	21	3	3.6				32.6584	35.2359	14.5007	7.67944				0.07	0.13	0.26	0.03
	1.55758	2.85948	3.4558	4.43367				1.8	16.2	5.4	1.8				25.0883	14.2978	16.1127	10.7212				0.42	0.27	0.16	0.12
	1.81931	2.57945	2.11741	2.83228				13.8	7.2	2.4	22.2				2.82999	6.94953	14.6628	10.3796				0.33	0.09	0.43	0.1
	1.02778	1.55235	4.2495	2.68138				3.6	4.8	22.2	3.6				30.8505	5.53714	17.5996	5.94601				0.17	0.09	0.1	0.21
	1.48568	3.06093	2.89361	3.05142				2.4	11.4	6	4.2				30.544	17.1543	11.4767	1.44272				0.53	0.05	0.21	0.24
	2.63669	1.69791	3.58058	0.547329				9.6	4.8	3.6	7.2				26.5832	27.8907	27.1436	15.5274				0.35	0.19	0.32	0.02
	2.44723	2.50212	2.11068	2.843				2.4	6.6	3	3.6				5.53186	10.8957	19.868	11.3422				0.21	0.25	0.42	0.09
	1.80917	3.01596	3.08817	3.59926				2.4	4.2	3	6.6				0.349032	12.2635	26.66	25.6168				0.1	0.11	0.14	0.3
	0.679213	2.51886	3.72852	3.88122				2.4	5.4	12.6	4.2				25.4606	12.3208	21.1034	7.10742				0.02	0.11	0.46	0.36
	2.36608	2.60114	3.65634	3.13451				7.8	7.8	6.6	3.6				22.5476	15.8157	8.52739	17.9264				0.44	0.06	0.18	0.17
	1.86378	1.04128	3.4744	3.36554				7.8	7.8	9	8.4				2.79882	8.04365	5.83727	11.2645				0.21	0.31	0.06	0.25
	2.72777	2.1235	4.1242	3.21592				23.4	6.6	10.8	2.4				43.0625	18.6508	14.7188	4.73793				0.02	0.12	0.1	0.17
	2.71676	3.15194	2.88702	3.00686				5.4	3	3	8.4				4.44064	12.3249	1.52969	23.2292				0.28	0.11	0.3	0.05
	1.02782	1.6574	4.33582	1.66386				9.6	6	3.6	9.6				5.57375	4.63955	3.94442	15.3831				0.04	0.07	0.08	0.59
	2.17336	2.65554	1.94813	3.30675				12	6	7.2	9.6				15.1132	12.6371	7.57608	2.39295				0.09	0.06	0.11	0.18
	0.50886	2.64422	3.58576	4.11336				10.8	10.8	11.4	11.4				10.5113	13.7336	10.1244	0.534255				0.14	0.09	0.2	0.03
	1.67281	1.94972	3.82701	4.80454				4.2	7.8	7.8	7.2				4.77773	25.2168	15.6859	9.39707				0.3	0.11	0.23	0.01
	2.0573	2.44871	1.87319	1.88833				12	8.4	3	18				6.53039	28.3858	3.6694	3.92002				0.22	0.26	0.22	0.21
	0.768035	1.94294	3.34851	3.89625				2.4	7.2	1.2	2.4				53.0068	13.6832	12.0484	7.66151				0.11	0.44	0.2	0.06
	2.2776	2.96937	3.8268	2.76696				4.2	4.8	8.4	12.6				37.3521	5.12828	3.34435	19.0531				0.41	0.16	0.22	0.07
	1.25148	0.903025	2.64341	3.56824				3	9	9	5.4				11.7697	18.106	4.48667	7.83903				0.11	0.09	0.02	0.37
	1.67659	1.43247	2.43088	2.34779				4.8	1.8	7.2	14.4				36.651	1.33958	5.61789	18.9208				0.1	0.15	0.08	0.25
	0.804706	2.04957	3.49847	4.326				14.4	6.6	11.4	4.2				10.713	16.4311	7.10458	20.958				0.71	0.04	0.08	0.18
	3.13485	0.893556	3.62253	3.8117				8.4	10.8	13.8	2.4				10.3218	11.2362	0.861885	39.5972				0.25	0.16	0.04	0.16
	1.69228	1.74664	3.22716	2.88724				4.8	4.8		12				8.6995	14.236	7.08784	27.5863				0.42	0.12	0.01	0.38
	2.72964	2.87062	3.70022	4.17217				3	12		6.6				26.1639	23.5977	4.06179	5.99566				0.25	0.08	0.09	0.54
	1.56368	2.19723	3.37502	3.83796				3.6	3		6.6				31.131	9.61708	3.75915	9.15658				0.34	0.13	0.05	0.11
	2.41538	1.9765	1.33712	1.1713				4.2	4.2		14.4				13.1672	30.2343	30.6321	27.7987				0.04	0.22	0.1	0.08
	0.925641	1.72292	1.84658	3.86697				10.2	7.2		1.8				26.408	39.3025	8.50185	10.8164				0.12	0.49	0.43	0.66
	1.24819	2.06042	3.37475	2.3011				4.2	6.6		3				3.08962	19.5421	11.7216	9.50746				0.07	0.19	0.15	0.16
	2.28261	2.73765	2.28388	3.75148				4.8	8.4		1.8				12.5964	8.19389	28.1331	3.67306				0.14	0.13	0.18	0.12
	2.31026	2.92195	2.16211	3.7693				6	5.4		2.4				9.2558	9.825	6.71075	50.8125				0.34	0.19	0.28	0.02
	2.36704	1.48783	4.06951	2.46115				3	3		10.2				20.0853	28.6892	3.52406	5.26722				0.49	0.12	0.05	0.8
	1.67361	1.96367	3.80298	3.96401				10.8	6.6		5.4				2.39975	34.1405	18.477	22.0439				0.13	0.33	0.06	0.09
	2.60587	1.54527	2.31894	4.05372				4.2	6		11.4				39.5912	27.6314	8.05733	4.17869				0.49	0.24	0.29	0.51
	2.23593	2.36823	3.91912	3.87025				5.4	10.2		5.4				22.9207	18.0923	0.321737	9.59711				0.02	0.66	0.08	0.05
	1.11931	2.40569	4.26765	2.82753				8.4	7.2		5.4				10.0067	5.50454	20.8628	7.92667				0.14	0.29	0.02	0.15
	2.45164	1.35054	2.60619	1.95376				5.4	5.4		4.2				16.7453	9.38651	15.3964	10.7431				0.08	0.02	0.2	0.07
	1.82258	2.88715	3.02968	3.55611				8.4	10.8		4.2				9.12518	26.1397	16.3109	15.8522				0.1	0.04	0.21	0.08
	2.52354	1.73614	3.79691	3.19669				1.2	4.8		10.8				25.8485	13.2111	13.4464	17.1768				0.2	0.5	0.16	0.18
	2.16208	1.47101	2.24145	3.0161				1.8	4.8		5.4				37.479	27.3349	5.59674	5.6202				0.03	0.1	0.09	0.22
	0.919875	2.17253	3.11969	3.86144				2.4	7.8		5.4				41.9633	10.3801	2.96316	6.8607				0.37	0.71	0.03	0.06
	1.5765	1.01363	1.491	2.76156				10.2	6		7.2				21.3463	29.6344	26.0685	6.46046				0.32	0.07	0.14	0.1
	3.73931	2.93778	3.35927	3.97416				18.6	7.8		11.4				63.6932	4.69946	9.54137	3.44113				0.14	0.28	0.37	0.27
	1.50344	2.28187	0.76525	3.52234				15	9		10.2				41.178	23.5951	17.8039	8.77547				0.34	0.14	0.08	0.13
	1.11952	2.14082	1.89033	3.34249				9.6	16.8		3				12.6882	23.6294	10.8374	32.2837				0.13	0.39	0.1	0.23
	1.00087	3.91122	3.94957	2.18208				1.8	6		3				6.87458	12.3658	9.77889	20.0456				0.58	0.2	0.14	0.6
	0.421112	2.35419	2.90202	2.70736				1.2	13.2		11.4				10.8874	11.9572	4.78529	8.1234				0.3	0.29	0.12	0.52
	1.63974	2.06288	2.37385	4.35037				7.2	1.8		7.2				30.9249	17.5897	33.2453	15.0408				0.1	0.17	0.16	0.06
	1.49896	3.41798	4.61174	1.8208				8.4	15.6		6				37.5966	3.17329	19.0277	6.2431				0.32	0.2	0.43	0.12
	3.33141	2.05638	2.92268	4.00737				9.6	13.8		11.4				2.62561	37.4074	24.2708	23.3656				0.61	0.09	0.16	0.26
	1.74376	1.87848	4.30985	2.30358				8.4	5.4		7.2				4.15178	12.6731	23.5556	17.079				0.47	0.5	0.45	0.42
	2.62769	2.28916	4.26048	3.42535				17.4	9.6		3.6				38.0364	12.8518	29.2071	5.84462				0.35	0.08	0.24	0.1
	1.88789	2.09732	3.68671	3.43726				5.4	12		7.8				18.7007	20.6419	5.23088	34.1562				0.07	0.34	0.1	0.1
	1.8931	2.28702	3.86102	3.77523				14.4	7.8		3				20.4045	5.39666	31.604	20.2638				0.33	0.2	0.09	0.31
	1.43027	2.8297	2.83493	3.78117				3	7.2		9				5.44202	6.72732	9.02352	22.4491				0.1	0.03	0.33	0.24
	2.13278	1.41933	3.01077	3.34473				14.4	9.6		9.6				30.5007	19.7718	4.82901	2.40813				0.27	0.16	0.14	0.17
	2.51484	1.47919	4.55537	3.27836				13.2	12.6		15.6				12.89	13.115	15.3283	21.6336				0.59	0.26	0.05	0.02
	0.944882	2.50501	3.72919	1.97085				6	8.4		15.6				29.1818	17.9126	5.13722	19.9572				0.02	0.08	0.25	0.35
	3.08859	2.54774	3.81149	3.33468				21.6	8.4		9.6				14	4.0411	10.2197	11.5208				0.49	0.2	0.11	0.5
	1.94776	0.766319	4.50302	1.89708				4.8	8.4		5.4				1.83161	28.579	27.7743	6.78464				0.03	0.06	0.14	0.18
	1.68537	1.85234	3.8404	3.53582				3	3.6		18.6				52.5514	16.1571	23.8914	7.41238				0.32	0.45	0.51	0.1
	1.50971	1.17376	3.27875	3.59779				12.6	15.6		10.2				0.97934	13.77	21.9245	57.7221				0.39	0.22	0.44	0.12
	1.83658	1.51346	4.51484	2.97663				6.6	8.4		3				6.34567	22.7722	14.3859	43.7299				0.2	0.1	0.33	0.6
	0.95299	1.85908	2.59144	3.49213				33.6	7.8		14.4				34.1874	18.4772	31.4683	15.2799				0.15	0.24	0.17	0.45
	0.894752	3.59784	3.48323	3.96395				14.4	15.6		3.6				6.87035	12.1657	17.8684	6.55444				0.03	0.19	0.64	0.12
	1.28432	2.89331	3.06779	3.21366				9.6	14.4		6				27.834	6.64787	11.6093	3.85213				0.13	0.31	0.1	0.09
	2.34993	2.59647	2.91483	3.91212				7.2	4.2		9				14.2543	19.1792	17.2403	21.3581				0.33	0.13	0.27	0.06
	2.42151	2.77665	4.43061	3.4546				2.4	5.4		8.4				21.438	16.8663	20.2284	18.1702				0.14	0.09	0.26	0.26
	1.75099	1.7517	3.44162	3.42516				3.6	13.2		12				16.4736	8.341	3.06216	7.23759				0.46	0.14	0.15	0.29
	0.6733	3.27477	3.15279	3.01345				6.6	4.8		9				32.8419	3.50812	2.45745	12.3896				0.05	0.09	0.05	0.06
	2.33585	1.86761	3.33986	3.69445				19.2	6		3.6				13.8629	20.4044	3.98584	6.98468				0.15	0.04	0.05	0.15
	1.72885	2.13468	2.9943	2.66911				12.6	10.2		6				7.19143	20.5986	11.0837	8.5778				0.04	0.14	0.03	0.09
	1.88598	1.81504	2.6678	3.45776				6.6	13.8		10.8				7.01293	8.77026	21.8155	20.9743				0.24	0.32	0.14	0.11
	2.66429	2.53975	3.08247	3.01972				7.8	4.8		11.4				20.14	12.1653	6.47996	22.1162				0.2	0.04	0.21	0.38
	2.61603	2.60365	3.05839	2.67754					18		15.6				2.95939	9.06655	1.55688	33.5093				0.42	0.14	0.09	0.32
	1.01338	1.45937	3.86808	3.34131					16.8		5.4				24.4243	28.9051	17.4359	10.2144				0.27	0.05	0.08	0.27
	2.1112	3.12671	4.81657	3.73305					21		2.4				28.767	17.2201	37.4697	6.19987				0.18	0.19	0.32	0.29
	0.814294	0.983461	3.65454	1.35611					12.6		4.8				13.2339	2.8928	23.1525	26.0354				0.27	0.17	0.32	0.08
	3.14512	1.4067	4.19128	3.06035					14.4		22.8				42.572	36.0335	2.43996	16.133				0.33	0.03	0.38	0.27
	1.67718	1.7853	3.3439	1.5164					7.8		5.4				6.03966	4.87783	36.5961	5.60137				0.05	0.45	0.06	0.31
	1.70074	2.07881	4.1327	1.81207					13.2		3.6				24.5164	6.05664	20.891	4.4744				0.11	0.04	0.33	0.12
	1.71807	1.23563	3.96125	3.3089					2.4		19.8				29.5754	2.88982	37.9801	5.07322				0.29	0.07	0.41	0.03
	0.819622	1.4035	3.51597	3.3707					15.6		2.4				4.22229	6.05383	3.08727	29.0489				0.11	0.02	0.36	0.06
	2.30533	1.63188	2.66841	2.18349					4.2		20.4				27.2488	30.7138	26.5612	34.0182				0.17		0.03	0.42
	1.23856	2.32628	4.09506	4.45352					24.6		18				6.28494	15.6169	26.5699	9.35413				0.08	0.49	0.62	0.59
	0.899447	2.44035	4.36798	2.78088					7.2		7.8				20.72	5.30424	20.0845	13.5829				0.19	0.41	0.27	0.19
	1.25624	3.3701	2.80459	4.16628					6.6		7.2				8.94593	6.54669	5.95121	8.80825				0.16		0.16	0.12
	1.61224	1.58753	3.9215	2.47042					10.8		3.6				17.5508	18.976	8.19117	29.4778				0.2	0.03	0.08	0.1
	0.909686	1.37079	1.32207	3.22571					6		10.8				24.6783	18.6743	19.6347	2.5078				0.36	0.09	0.16	0.39
	2.46545	3.17559	2.7868	3.08646					9		5.4				18.9002	17.3558	2.16646	10.0205				0.28	0.28	0.52	0.03
	1.35584	3.17716	3.66416	2.85947					18.6		9.6				48.4628	11.2293	12.9064	7.60138				0.32	0.17	0.01	0.18
	2.65556	2.56909	3.69277	3.2527					13.8		11.4				13.7831	11.7302	4.04001	5.2869				0.23	0.16	0.4	0.06
	2.54854	1.69156	2.16997	3.03907					15.6		4.8				55.4963	23.3987	9.63209	22.2927				0.48	0.08	0.04	0.03
	2.22433	2.68089	3.62371	2.58115					14.4		21.6				19.0515	18.1403	9.59391	10.9286				0.26	0.31	0.22	0.37
	0.852801	1.69015	2.1884	2.7755					6		7.8				36.3858	30.0772	19.6525	10.4027				0.06	0.18	0.06	0.1
	2.26619	2.6136	4.33228	3.45127					6.6		4.2				6.39035	9.74018	27.3052	9.88995				0.15	0.33	0.26	0.14
	2.39493	2.54407	2.84168	3.34005					13.2		21.6				20.2416	10.0402	37.1293	17.5957				0.72		0.19	0.12
	2.38913	2.82302	3.45597	2.53085					9		4.8				59.5023	10.899	2.7582	5.6335				0.09	0.11	0.44	0.13
	1.69594	2.06065	2.09959	4.33554					4.2		10.8				11.5523	14.4823	36.1672	5.92083				0.18	0.42	0.11	0.09
	2.55444	1.19503	2.93681	3.74206					14.4		12				46.6858	20.8496	11.2371	30.7884				0.14	0.14	0.31	0.05
	2.10981	2.00998	3.63472	4.3233					12		2.4				75.2142	19.7461	33.035	49.2182				0.86	0.5	0.47	0.17
	1.60947	2.42237	3.42273	3.60907					16.8		1.8				77.7304	38.9586	12.9166	34.1442				0.3	0.31	0.4	0.86
	1.62605	2.03662	3.49935	3.78877					4.8		10.8				82.8165	27.0085	45.2774	4.393				0.85	0.59	0.24	0.23
	1.8818	3.14682	4.34676	3.82211					15.6		9.6				19.956	11.5611	19.5037	15.1734				0.3	0.46	0.37	0.03
	2.55383	2.28552	4.30758	4.14855					29.4		9.6				37.3807	21.476	58.1945	6.37997				0.84	0.18	0.15	0.19
	2.53809	3.48159	2.14244	3.12808					19.8		21.6				9.86977	25.4359	21.7906	22.8707				0.14	0.24	0.53	0.04
	1.02543	2.09044	3.62859	3.40119					17.4		7.8				14.3725	15.5038	19.3304	8.45403				0.06	0.33	0.31	0.12
	1.56338	0.923307	3.74968	2.42474							26.4				24.3824	30.4352	8.41767	29.5726				0.45	0.09	0.25	0.03
	1.43812	2.70626	1.73435	2.0793							2.4				36.5168	23.4243	25.7503	3.74504				0.1	0.35	0.05	0.46
	3.7873	1.38671	2.41848	4.53438							2.4				39.5141	3.97277	17.2216	2.13345				0.18	0.18	0.39	0.07
	1.22459	1.052	3.37921	2.91163							7.8				23.0094	24.7617	42.5874	4.53247				0.11	0.03	0.33	0.07
	1.0238	1.87844	3.7208	2.70541							3				7.7142	29.2859	24.8702	6.34294				0.42	0.19	0.31	0.03
	0.417235	2.82851	2.70388	3.05627							12.6					15.7441	15.3601	34.1378					0.25	0.24	0.03
	0.896741	1.8777	3.06263	0.588681							22.8					37.1386	3.66577	6.77723					0.21	0.18	0.29
	3.3114	1.25279	2.50419	2.89013							17.4					18.1278	11.7216	13.048					0.48	0.04	0.27
	1.90642	2.69622	3.52355	3.87634							18.6					20.4919	7.11564	11.1059					0.17	0.1	0.13
	2.67003	2.53363	3.52481	3.86353							19.8					11.0294	31.0662	18.7045					0.15	0.05	0.12
	1.80818	1.69458	3.15891	3.23399							7.8					15.6738	27.7712	6.35461					0.22	0.35	0.32
	1.9505	3.29445	3.79172	2.39461							24.6					21.4699	19.3735	15.4508					0.39	0.29	0.1
	1.45757	1.56262	3.56387	3.85125							29.4					20.8674	8.34864	14.3302					0.13	0.2	0.28
	1.89652	3.00861	1.37869	4.27203							16.8					13.8069	23.6202	6.19296					0.22	0.07	0.17
	1.16556	4.12786	1.84413	3.2629							18.6					6.58614	10.6611	7.63255					0.15	0.35	0.07
	2.98247	3.23909	3.27667	2.93207							3					24.6546	24.5764	2.70453					0.05	0.13	0.05
	2.05799	3.08632	2.22258	1.86491							21					12.4365	24.4058	17.6899					0.31	0.34	0.02
	1.62	2.55576	2.18249	3.09912							1.2					9.19069	29.8525	5.51868					0.09	0.23	0.27
	1.52287	2.98975	3.9412	4.62913							4.8					29.2977	22.5469	5.38175					0.1	0.37	0.12
	1.82819	2.76448	3.90353	3.85526												10.6452	16.9976	8.98882					0.27	0.28	0.13
	2.45463	1.75473	2.44573	1.91298												19.16	7.62425	14.4962					0.12	0.21	0.16
	2.47104	1.52673	3.90246	4.15544												15.9804	17.2521	20.4469					0.28	0.1	0.1
	1.70612	3.19147	4.31445	4.17003												19.3276	34.0411	29.2228					0.22	0.23	0.09
	0.638938	1.95286	2.55673	3.6593												25.6672	17.4411	14.5685					0.19	0.35	0.19
	2.20802	3.07973	2.821	2.80247												11.4749	27.6796	22.1314					0.18	0.37	0.09
	1.72893	3.01994	4.19476	2.27333												2.99936	6.15806	7.04815					0.12	0.23	0.22
	2.42635	1.10092	2.19209	4.62925												11.0067	12.7599	11.6107					0.04	0.24	0.09
	1.87392	2.41799	0.901052	3.55955												25.7853	16.8426	8.21484					0.2	0.07	0.12
	2.71737	2.40199	2.02934	2.89178												7.16662	28.7941	9.32928					0.23	0.29	0.08
	1.02694	2.27884	3.97773	4.14672												21.2007	15.3084	29.8864					0.12	0.38	0.1
	2.21565	1.30425	2.33426	0.767113												1.25384	22.6346	8.88381					0.32	0.17	0.21
	1.3375	1.606	2.80163	3.62786												16.4935	4.32669	5.12699					0.02	0.28	0.13
	0.80443	3.59017	4.7725	3.35994												5.6189	10.1557	20.134					0.16	0.03	0.11
	3.07734	2.28919	2.94934	4.02145												15.4348	28.8643	16.0181					0.05	0.06	0.25
	1.63044	1.73691	4.342	2.39376												26.3059	14.6726	13.9885					0.1	0.14	0.18
	1.56098	3.785	3.62583	2.27766												38.9258	12.9614	25.3995					0.33	0.1	0.3
	2.20717	3.05255	3.56607	3.99407												24.7411	8.37019	68.2845					0.24	0.27	0.18
	0.720607	2.96394	3.63098	4.23982												11.1888	5.81898	10.311					0.14	0.07	0.39
	2.33659	2.22406	1.89161	2.15396												29.6154	6.69531	35.3584						0.18	0.2
	1.2799	1.76028	2.84485	3.77284												32.309	37.3053	2.03621					0.66	0.27	0.54
	0.951116	1.78669	4.39112	2.74239												13.4936	17.9985	30.6067					0.19	0.51	0.05
	1.18985	2.15113	3.84171	3.47298												33.7197	38.6661	14.5419					0.11	0.24	0.73
	1.56233	2.60778	3.5478	2.80742												36.4457	5.77171	18.5848					0.26	0.23	0.17
	0.931923	1.6733	3.70949	3.49115												24.6033	21.9293	9.30463					0.41	0.05	0.13
	2.49322	2.43196	4.40866	3.88989												8.91636	14.6711	21.0833					0.2	0.18	0.21
	1.43201	1.45732	3.33864	3.94002												45.8552	13.574	23.5545					0.17	0.2	0.16
	2.79813	1.67494	4.65489	2.76453												28.6026	11.6297	9.84494					0.13	0.2	0.47
	2.44682	3.16551	4.17817	4.01638												24.0089	29.8369	23.3823					0.26	0.07	0.1
	2.24073	1.68723	3.49935	3.52277												38.2486	47.0598	23.3508					0.22	0.48	0.18
	0.8274	1.44193	3.2144	3.05188												11.9969	12.1782	6.25757					0.26	0.68	0.23
	2.39275	2.37121	2.91123	2.32216												2.57743	19.5193	21.1202					0.11	0.25	0.04
	2.3635	2.83149	4.48277	2.495												25.1303	18.4746	25.4596					0.05	0.22	0.45
	2.61922	2.4797	3.28083	3.63075												33.3264	22.5114	10.6252					0.17	0.22	0.17
	1.65275	2.47896	3.17052	1.76868												19.7557	1.52633	29.5931					0.23	0.12	0.1
	2.52817	1.05115	3.22624	3.85363												20.7402	25.4012	14.4289					0.17	0.02	0.46
	2.21179	3.11389	2.66111	2.42648												13.9286	18.9665	3.92751					0.37	0.32	0.3
	1.65947	2.16588	2.98038	3.5267												21.0328	21.5512	8.7289					0.23	0.13	0.06
	1.71259	2.49222	2.78704	2.04975												21.6708	20.8713	3.59658					0.3	0.16	0.17
	1.8993	2.45478	3.89689	3.67098												7.77677	21.9276	29.983					0.19	0.25	0.08
	2.62942	0.848728	3.11348	3.40066												4.57857	9.14121	22.9292					0.16	0.45	0.47
	0.993259	1.87598	4.34425	4.01622												19.6014	19.8198	9.19195					0.04	0.75	0.15
	1.62892	1.50334	3.63954	3.73692												43.4287	66.418	18.562					0.21	0.29	0.32
	3.8098	2.44742	3.84798	3.37176												19.4392		27.0175					0.26	0.86	0.05
	1.65229	1.85057	4.14906	3.28615												41.0642		45.9515					0.25		0.62
	1.14957	1.39034	3.39344	2.06553												28.1321		8.69403					0.23		0.57
	1.01469	2.45135	4.38888	3.07911												13.4581		18.4768					0.31		0.23
	0.44246	1.95146	4.03451	1.84106												35.538		15.7406					0.2		0.25
	0.868123	0.876024	4.04682	3.68417												27.6798							0.39		0.24
	3.37885	1.59348	2.57969	3.28963												17.495							0.21
	1.85532	1.89866	4.06954	3.32097												4.32293							0.16
	2.57704	1.57823	3.85204	3.52025												2.94205
	1.52559	1.77386	4.44359	2.91417												8.77911							0.03
	1.87274	1.89772	2.75664	3.56731												21.692							0.32
	1.42343	2.30033	3.99275	2.49406												68.4627							0.15
	2.03376	2.89508	1.38818	3.37365												17.3574							0.36
	2.44098	1.37624	2.75995	2.71606												12.646							0.1
	2.93352	1.76807	3.7347	2.75742												14.1549							0.08
	1.98431	2.42551	2.06654	3.32238												24.2006							0.23
	1.64461	2.78108	3.13359	3.48261												24.0889							0.19
	1.50492	1.46688	3.61189	1.14488												21.2566							0.16
	1.73047	1.81233	2.15259	3.07262												28.6428							0.31
	1.14092	2.93991	4.16108	1.56988												13.8898							0.25
	1.05052	1.62556	2.70871	1.90428												18.7695							0.13
	2.58719	1.3854	2.0717	4.28354												21.7943							0.14
	2.05742	2.15929	3.33684	2.65565												26.7647							0.11
	1.75426	0.890803	3.01001	3.8848												21.7055							0.18
	0.644618	2.74941	3.44007	2.3707												29.5462							0.13
	2.13889	2.01175	3.59838	3.18093												10.8055							0.17
	1.71205	2.20097	3.26201	3.01794												9.0522
	1.1134	3.57319	3.83121	3.1067												39.5385
	2.36876	2.38517	2.63672	3.5704												11.8681							0.4
	1.82818	3.44906	4.49026	4.03472												17.589
	2.66045	1.50715	2.01043	3.18331												15.8617							0.15
	1.02423	1.99711	3.52425	3.924												24.7703							0.13
	1.99842	1.94656	3.63671	2.9965												32.0027							0.29
	1.13906	2.33004	1.46915	2.41428												27.098							0.22
	0.780902	1.8126	2.28902	2.41087												23.52							0.23
	3.07809	2.90419	3.34462	3.44089												11.5034							0.14
	1.66761	0.87289	3.93576	3.26878												27.0711							0.23
	1.43505	2.08278	2.54429	2.57499												34.3167							0.3
	2.13391	2.08438	2.9852	4.15898												11.639							0.26
	0.776678	1.71659	3.49182	3.19673												37.3655							0.1
	2.27437	2.78052	2.40766	3.10752												8.71229							0.45
	1.17701	1.33652	3.17785	2.26716												30.4373
	1.13559	1.99419	3.83359	4.30053												7.19605							0.56
	0.73494	1.80282	3.38445	3.30679												34.73							0.05
	1.54016	2.23693	1.32634	3.67683												35.6211							0.38
	2.38012	0.813925	3.25386	3.96757												33.2711							0.21
	2.14551	1.12252	1.85253	4.03437												16.7905							0.26
	0.923285	1.33749	2.10491	3.15793												30.9701							0.08
	2.45014	1.95672	2.31417	3.054												27.6256							0.26
	2.30506	1.41724	3.89577	2.26516												28.4678							0.26
	2.33242	2.24738	3.87888	1.99238												33.2979							0.39
	1.53842	2.5656	2.50286	2.98061												39.2981							0.47
	2.28144	2.59153	4.05965	3.51789												7.60058							0.3
	2.12031	1.26574	4.16531	4.37411												14.6496
	0.738336	3.54833	2.55328	2.83788												16.3356
	2.32183	2.83157	2.89334	2.70213												11.0252							0.13
	2.36299	2.35715	3.87658	0.571277												5.94973							0.35
	2.42834	2.65103	2.2254	3.00049												18.0161							0.04
	1.68621	1.64631	3.34058	2.82698												52.9844							0.17
	0.970239	3.17595	1.98918	3.6816												7.02782							0.6
	0.41743	1.73648	0.86157	3.66601												28.7321							0.07
	1.56696	1.86196	1.9739	3.1316												7.31546							0.2
	1.79066	1.65463	4.05801	2.24716												37.6595							0.04
	2.017	2.5776	2.73283	3.99674												8.07267							0.22
	1.93213	2.36398	2.29196	3.78365												36.8286
	2.40566	1.32068	4.6755	3.15468												54.5343							0.23
	1.00973	3.0764	2.92389	2.80408												3.50689
	1.6401	1.6746	4.05583	1.85953												22.1896
	3.5641	0.973571	4.36791	3.37575												19.9343							0.21
	1.39846	1.38111	3.65612	4.66872												35.5911							0.44
	1.13728	2.04241	3.51207	3.96588												49.7515							0.35
	0.953953	1.90153	2.67881	1.86051												2.77511							0.41
	3.23434	2.01862	4.23169	4.2339												19.5693							0.02
	1.8432	1.37226	3.6949	0.975745												38.9756							0.12
	2.63147	1.67132	4.35476	4.3018												13.0494							0.53
	1.8966	1.58337	3.73902	2.82783												15.5773							0.13
	1.98667	2.19399	3.34086	3.4882												10.6445							0.41
	1.56454	2.44828	4.0376	2.24399												11.2446							0.19
	1.80363	3.3197	4.38399	4.40946												32.1175
	1.10524	1.59424	3.8864	3.65352												8.31365							0.19
	2.92802	2.17138	2.49864	4.46025												23.4133
	1.89216	2.8944	3.45566	3.1996												41.63							0.27
	1.64446	3.44412	3.07533	0.675867												29.2706							0.31
	1.51966	2.15953	2.96955	3.93907												19.0994							0.37
	1.55619	2.72339	4.41917	3.58579												29.8722							0.46
	1.20515	1.46094	3.43784	2.42463												52.4914							0.51
	1.01619	1.55924	2.92692	4.01011												29.1884							0.58
	1.2018	2.75656	3.33325	3.70342												55.7382							0.3
	2.44377	2.45041	2.36822	2.26624												56.4312							0.26
	2.40603	2.68535	2.83262	4.1063												17.2216							0.3
	1.68616	1.27148	2.68487	4.10852												24.4869							0.1
	0.589734	2.00499	3.83138	1.82373												22.0999							0.39
	2.32545	2.06095	2.14318	2.55334												22.6182							0.15
	2.32078	2.44898	2.95828	3.7581												29.546							0.18
	1.80403	2.3231	3.08143	3.5337												4.0286							0.18
	2.50122	2.98661	3.53671	2.90396												59.1052
	0.989929	2.16294	4.63923	3.20671												17.9198							0.88
	2.23743	3.4455	3.81651	3.61146												23.0312							0.13
	0.759086	2.19588	4.05794	2.14169												16.6806							0.22
	3.07857	2.08623	3.26369	2.78957												58.3515							0.07
	1.50835	0.929533	4.11809	4.16328												28.777							0.41
	1.41112	2.45948	3.27642	3.41048												13.4291							0.54
	2.07005	1.20698	3.66106	3.11061												21.5306							0.08
	0.746066	1.14928	2.49519	2.28066												48.5428							0.15
	2.11596	2.80449	4.17535	2.55471												13.6766							0.7
	1.16511	1.94454	4.13468	3.96792												40.9033							0.73
	1.04808	2.13941	4.24339	1.83585												5.39103							0.26
	1.1204	2.76756	2.72041	3.73719												36.9641
	1.46898	2.04284	3.79812	2.36391												50.2968							0.3
	2.31947	2.75128	1.33444	3.25398												28.4437							1
	1.35832	3.22336	2.56663	1.56871												4.71612							0.47
	2.67048	1.64393	3.57844	3.09209												36.5602							0.37
	2.15664	1.48639	3.57949	3.63433												43.3646							0.64
	0.694427	3.14251	2.16844	3.54699												4.96282							0.7
	2.02423	4.17517	3.10671	3.89269												14.0584
	2.29366	3.04296	1.9967	3.14118												40.7882							0.27
	2.29423	3.35027	3.62453	1.87729												31.7644							0.85
	2.41884	2.38274	2.86962	3.09039												44.9043							0.38
	1.68044	1.60837	4.40049	1.8152												32.6635							0.39
	2.45538	2.59913	3.35278	3.74465												14.6981							0.41
	2.0864	1.53445	3.51741	3.2751												28.1485							0.13
	0.931687	2.74762	2.9059	3.89764												56.8096							0.3
	1.56764	1.40757	4.44112	3.44832												44.7851							0.32
	1.65556	3.39058	2.01444	2.89022												51.992							0.63
	2.06152	1.87569	3.2467	2.61193												88.8351							0.16
	2.34875	3.10033	3.70601	3.76092												90.3078							0.52
	2.35619	3.01456	1.4531	2.45345												20.9918							0.75
	1.05477	1.18049	3.18954	3.49566												84.3949							0.16
	1.7329	2.27941	3.69344	3.32648												11.1918							0.85
	3.57002	2.01345	2.73331	2.57386												35.476							0.12
	1.42124	2.33815	2.69218	3.28081												31.7751							0.12
	1.18892	1.22878	3.55184	1.18209												22.8157							0.88
	1.02828	1.49221	2.28022	2.78473												26.5735							0.55
	0.429479	3.34092	3.11986	1.6765												124.089							1
	0.995162	1.38199	3.59576	2.17788												41.0923							0.66
	3.20578	1.81139	3.4081	4.23298												257.212							1
	1.63365	2.06958	1.21698	2.61006																			1
	2.50724	3.70029	3.32753	4.06378
	1.9984	2.87518	1.77435	2.21918
	1.95034	2.77652	2.02373	3.07001
	1.43113	2.04453	2.27373	2.80752
	1.99273	1.89953	3.83268	3.43689
	1.18218	1.7381	3.90701	3.86892
	2.98661	2.16843	2.38705	3.08294
	1.86471	2.4115	4.0666	3.81122
	1.67421	2.57321	4.13125	3.49478
	1.40521	2.32041	2.34666	2.51929
	1.59051	1.61613	2.9952	2.49501
	1.23528	1.48775	4.07011	3.56853
	1.12139	1.57911	2.2384	3.3291
	1.20506	3.13652	1.87546	2.63397
	2.38132	1.25931	0.833659	4.3067
	2.40521	2.93502	1.93809	3.03208
	1.65183	1.88966	3.84377	2.93376
	0.619457	2.37404	2.63681	2.19966
	2.04226	3.00412	2.17935	1.31643
	1.7966	2.40535	4.81364	3.32642
	2.1526	2.53781	2.74674	3.55337
	1.7153	1.0936	2.16628	3.9251
	2.49069	1.13953	4.20711	3.11235
	0.996084	3.19022	4.14305	4.16589
	1.90076	2.08802	3.56929	3.26175
	1.55474	2.25943	3.76	1.96026
	0.751666	2.3137	2.85716	1.49411
	2.97958	1.40339	2.71042	2.9857
	1.443	1.92595	2.70497	3.58385
	1.3808	2.40853	4.33969	2.96307
	1.99912	1.62098	2.83061	0.659281
	0.712468	2.65199	3.53804	2.44286
	2.03239	2.54727	3.75885	2.86016
	1.12752	0.788824	4.28774	2.74902
	2.69141	1.41179	3.74363	3.76883
	1.48363	2.01979	3.24593	3.49946
	0.938709	0.876139	4.559	2.95037
	1.0088	1.67359	3.72173	3.96815
	1.6937	1.97361	4.16121	2.40453
	2.3313	1.78684	3.44341	3.74145
	2.05278	3.00337	2.65836	4.27416
	0.916962	1.60741	2.98279	4.31558
	2.34694	1.91883	2.83062	3.84153
	2.11515	2.74437	4.38079	3.39192
	1.98085	1.34162	2.68853	1.82644
	2.25691	1.76168	3.65783	3.20445
	1.99557	2.28487	2.36391	4.50566
	0.66876	2.68498	3.29162	3.87323
	2.27894	1.49454	3.59476	1.66199
	2.24081	2.70383	2.00202	3.98625
	2.36723	1.23222	3.03832	0.822168
	1.00393	2.6169	3.00627	2.55999
	0.424996	1.63675	4.41922	4.1872
	1.62611	1.44018	3.47252	4.4848
	1.71688	0.881158	3.92839	3.43062
	1.32032	2.15994	4.17074	2.21288
	1.83842	2.8001	3.20548	3.17603
	2.09898	2.03509	4.19519	4.01316
	0.902483	2.29536	3.71228	3.69129
	1.55372	3.69165	4.13896	4.26237
	3.51381	2.24121	2.64822	2.92688
	1.63185	3.41425	4.11215	3.68107
	1.11677	2.028	4.10352	0.751266
	0.882818	2.02264	4.4003	3.44367
	1.64495	1.94541	2.56017	2.50039
	3.24666	2.39344	3.89514	2.4435
	2.587	1.75719	1.42686	2.2846
	1.72761	1.9585	2.65804	3.99558
	1.94804	2.07109	3.6734	3.91282
	2.10877	1.83593	2.55502	2.77531
	1.58322	1.87436	3.55699	3.68454
	2.68699	2.70304	2.10579	1.91897
	1.95042	1.24961	4.08829	3.40367
	1.61281	1.26513	2.07648	3.43575
	1.44331	2.01876	3.11754	2.7846
	1.56638	1.70498	3.5802	3.59325
	1.21297	2.32278	3.03302	3.67566
	2.40112	1.12174	3.32939	2.82207
	2.22311	1.34009	3.59134	3.8966
	1.62323	2.03558	3.18818	3.33049
	0.561119	1.51071	2.19104	3.03216
	2.28656	2.24092	4.43847	2.11989
	1.68555	3.48391	2.06747	2.51345
	2.48269	2.80615	3.5403	3.78992
	0.977746	2.40483	3.47524	1.71031
	2.05928	2.50393	1.27755	3.8273
	0.701593	1.61679	3.12147	2.32338
	2.95033	3.12535	3.72953	3.0881
	1.53806	1.75063	2.56891	1.69389
	0.541266	2.05878	2.39285	3.69727
	1.28958	1.63032	3.6456	3.17252
	1.99909	2.34006	3.40899	3.76768
	0.718908	2.52957	3.11553	3.46184
	2.02604	1.42243	3.62263	3.32634
	1.19565	2.81683	3.49727	3.3078
	1.4599	1.66419	3.30183	1.87816
	1.04327	0.905103	1.67058	3.08497
	1.00312	1.38746	2.1056	1.73135
	0.678513	1.94945	3.94499	3.64214
	1.45599	1.21852	3.88822	3.60155
	2.21274	1.30916	2.36288	2.50357
	1.98543	1.536	4.22596	3.50006
	0.879574	2.23602	4.12034	3.4378
	2.33293	2.49988	2.40774	3.0243
	2.5271	3.40414	2.85446	3.15238
	2.10878	3.13704	3.67151	2.57688
	2.25279	1.7609	2.13641	3.26004
	1.989	2.38459	3.24738	1.0119
	0.639165	3.29836	1.6791	2.72159
	2.12483	2.11197	0.796359	1.68057
	2.16661	2.61854	1.92068	2.26737
	2.30003	1.34603	2.72722	2.17899
	1.65686	1.55797	3.83243	3.06237
	0.968599	2.65225	2.76781	2.59578
	0.416058	2.21819	2.30803	2.88599
	1.48139	2.70766	4.8616	3.54897
	1.59451	1.91197	3.05055	4.0143
	1.97774	1.24285	4.28191	3.01307
	1.41509	1.97337	4.36469	3.7313
	1.69931	2.58645	4.21828	3.32186
	2.22184	2.16901	3.78546	3.55537
	0.897653	2.86362	3.57327	2.89621
	1.59356	2.00345	2.78478	2.44134
	3.22008	3.26135	3.36609	3.41297
	1.67916	2.17365	2.39418	3.32123
	1.09647	2.08862	4.45054	2.51128
	0.903893	0.800585	3.56109	4.31506
	1.64067	2.67359	3.58082	3.08391
	2.73862	3.08419	3.64539	2.98655
	2.51391	1.30539	3.15846	2.20642
	1.85012	0.980283	4.22241	4.09791
	1.10354	1.89067	3.75148	2.49477
	2.67496	1.07324	3.92151	4.01652
	1.82793	2.53418	2.47486	3.91761
	1.65833	3.28778	3.43609	3.06276
	1.62818	2.28734	3.03411	2.98305
	1.53739	2.42298	2.68592	4.17589
	0.987118	1.61306	2.52753	2.14407
	1.12995	3.22815	4.3918	2.0376
	2.15104	1.36502	3.6839	2.91507
	2.34818	1.27582	3.13738	3.34656
	1.67968	2.87656	2.2411	2.41521
	0.566503	3.97957	3.77113	2.8972
	2.05266	2.90163	1.85465	2.87641
	1.702	3.21293	3.00489	1.76718
	2.09447	1.29715	3.85084	3.60571
	1.59304	1.51864	3.12462	3.48253
	2.49103	2.61476	4.52766	3.02229
	0.955726	1.53811	3.61441	4.24353
	1.93687	2.71992	3.97808	2.2887
	1.46656	3.3138	4.03584	3.68516
	0.535879	1.4841	3.14927	3.85745
	1.28482	1.83377	3.05823	4.10956
	2.15013	2.90839	3.59783	3.58214
	0.714619	2.80163	4.23152	3.45049
	2.13215	1.10101	4.13727	1.7272
	1.18463	2.18317	2.61861	3.31572
	0.992323	1.99151	4.01858	3.82327
	0.658069	2.14426	3.88208	4.49979
	1.44118	1.05943	2.71854	1.69576
	0.885977	1.47091	3.83112	4.06937
	2.93166	1.83547	1.47452	0.603775
	2.18815	1.6817	2.55437	2.71483
	2.26306	2.17754	3.56426	4.26747
	2.714	3.58693	2.10767	4.21705
	1.26676	2.80243	4.30063	0.581714
	1.04177	2.90321	3.01298	2.59202
	1.90708	1.88942	3.31207	2.22662
	0.617614	1.85196	2.0376	3.88256
	2.12193	2.29555	2.88717	3.62202
	2.16057	2.03567	3.16533	3.00418
	2.24821	1.68382	3.72529	4.54113
	1.66541	2.75689	2.02906	3.46679
	2.25321	1.64769	4.45004	0.731004
	1.91473	2.26619	2.09509	3.34923
	0.836134	1.43633	3.53466	2.6201
	1.82261	1.59197	3.54818	3.85429
	1.81429	3.21328	1.33757	3.37774
	2.09369	2.32712	2.04321	2.618
	2.08018	2.93188	2.91591	2.1086
	0.754328	3.02003	2.3319	3.99701
	1.54974	2.70896	3.71532	4.07647
	3.26721	2.35251	2.47418	2.70058
	1.32623	2.46669	3.62854	3.69653
	1.06719	1.04534	2.27775	1.94492
	0.907016	1.13748	3.23725	3.41762
	0.432918	3.04467	3.76936	3.24837
	1.4149	2.22544	3.33469	2.84822
	0.869909	2.33873	1.63833	3.88688
	1.58701	2.56085	3.22577	2.67826
	3.03278	1.8321	1.234	3.42454
	2.42507	1.35384	2.76314	3.95583
	1.79046	2.3209	3.92914	2.82939
	1.64297	2.78913	3.88116	3.85026
	1.38403	1.97506	2.26487	3.37268
	1.70436	1.2308	4.00292	2.85121
	2.6627	0.812045	4.17494	2.22945
	0.979026	2.5153	2.3809	2.62835
	1.78047	0.869362	2.75726	1.66436
	1.61726	1.58949	3.68915	3.91006
	1.44504	1.75001	2.13543	3.77738
	1.58365	1.62202	0.800677	2.92221
	1.24298	1.84098	1.87342	2.4075
	2.34141	1.76573	2.71449	1.61052
	2.23258	2.90822	3.89565	3.51321
	1.53559	2.56338	2.10232	3.33378
	0.555512	1.33751	2.95153	3.17512
	1.87758	1.7368	4.06386	3.61294
	1.5619	2.85064	3.00061	3.50977
	2.23281	1.54153	4.0903	3.88992
	1.57703	1.73305	3.56521	3.35586
	2.35598	2.22973	3.55152	1.86709
	1.03053	2.37986	1.91998	2.94584
	0.723872	2.71867	2.43788	1.68487
	1.8648	1.47691	4.36825	3.49808
	0.682537	1.67134	3.32861	3.30233
	2.95407	1.4441	4.54411	3.08349
	1.42118	0.894526	3.627	3.84739
	0.609898	2.17261	3.22259	3.74077
	1.30937	2.75191	3.93751	3.53523
	1.95646	2.16085	4.37502	2.83415
	0.687367	1.88604	1.87959	2.59836
	1.91244	3.64401	4.13775	3.56356
	1.12305	2.09198	2.41826	3.25968
	1.02236	2.45426	3.1452	2.40077
	1.04522	3.31482	2.73889	3.22813
	0.656194	1.92602	4.47772	2.51923
	1.36675	1.80517	2.49332	3.26849
	0.77788	2.2992	3.61976	1.08878
	2.17805	1.68593	3.01396	2.61481
	2.59398	1.64389	2.29152	1.63403
	2.13645	1.87263	2.59483	2.36396
	1.29405	2.03355	2.82438	0.97652
	1.92242	1.73995	3.94607	4.01833
	0.639113	1.94397	3.89095	2.39934
	2.13122	2.58983	3.62828	2.20126
	2.18335	1.33203	4.63368	4.24391
	2.22993	1.06519	4.171	2.85128
	1.65081	1.97879	3.2941	2.63097
	2.39655	1.80108	3.95659	2.70568
	1.89146	1.02031	3.98898	3.40865
	1.35746	2.28826	4.12158	3.94574
	1.83614	1.42951	3.28214	3.3872
	0.961343	1.98372	2.71608	2.37398
	1.86021	1.54958	4.24599	2.93493
	2.1786	3.30905	4.23754	2.44425
	2.20104	2.41752	2.56082	3.42257
	0.848488	2.79426	3.77155	3.37809
	1.56431	2.51677	1.43651	2.537
	3.27909	3.00851	3.52185	4.33072
	1.62359	1.58705	3.77454	2.79049
	1.16309	1.69872	1.70054	2.16524
	0.914413	1.86698	1.89557	2.90335
	0.436075	1.64744	3.00005	2.42876
	1.60817	2.14555	3.17639	3.35188
	3.10473	2.46103	2.91347	3.66603
	2.54684	1.45687	1.9357	3.81974
	1.36937	3.01134	2.94808	3.01265
	1.60151	0.974541	3.30634	2.90557
	1.29941	1.32475	4.45997	4.37928
	1.85806	1.96936	3.34369	1.81052
	2.55242	1.69128	3.10772	1.42084
	1.75987	1.33821	3.22196	2.99591
	1.5728	1.61725	3.0834	4.18122
	1.29965	1.65881	4.20237	4.55269
	1.40103	2.00978	4.13626	2.37629
	1.06198	1.29259	2.0387	0.584521
	0.925784	2.3835	3.38727	2.7048
	0.954485	2.27172	3.42977	2.37181
	1.18819	3.3023	1.39366	3.67159
	2.35372	1.53073	2.11789	3.55077
	2.23096	2.92473	2.94104	2.95567
	1.53069	3.09549	2.50853	4.05378
	0.560857	2.18271	3.88532	3.76025
	1.98877	1.45127	3.37385	4.13331
	1.67078	2.49788	2.21393	3.83701
	1.04164	1.39243	2.17016	2.55241
	1.9423	2.55626	3.4974	3.85497
	1.66099	2.13145	3.08325	2.66335
	2.37498	2.51781	3.59519	3.38033
	0.936197	1.92967	3.31238	1.74957
	1.83187	1.07743	3.30229	4.64515
	0.657526	1.04234	1.21783	3.20189
	2.93157	1.80938	1.69443	3.69995
	1.33696	2.46593	2.17426	1.69319
	0.582141	2.21117	4.25389	4.11533
	1.8767	2.97441	2.77839	0.538848
	1.24893	1.95379	3.87496	2.50368
	0.669417	3.6373	3.90786	3.77559
	2.00208	2.14892	2.39641	3.38628
	1.10124	2.02736	3.69238	2.11101
	2.26066	0.771639	4.15802	3.76863
	1.15937	2.32126	2.27366	3.50875
	1.01731	1.19416	2.71221	3.26858
	0.982501	2.03144	3.73142	4.20192
	0.644257	1.43637	2.21596	2.80342
	1.42244	3.06641	2.50351	0.703849
	1.62975	1.26175	1.49893	3.86149
	2.41394	1.73226	2.45851	2.77171
	1.93601	1.03778	0.713924	3.49544
	0.800766	2.6014	0.582105	1.59015
	2.30353	3.1283	1.74675	3.35914
	2.12554	2.26081	3.78636	2.14337
	1.79376	2.38856	2.28412	3.77013
	2.09161	1.57596	2.76486	3.85285
	1.81652	3.11944	4.63201	2.58017
	0.587336	1.45008	2.92469	1.9126
	2.18155	1.26548	3.12642	3.76281
	2.32591	2.65193	4.26161	3.28385
	2.33227	4.02797	4.34143	2.69576
	0.529238	3.02812	4.35673	3.23764
	0.411673	3.30446	3.76674	3.768
	1.52264	2.40644	3.6248	2.94552
	1.11708	1.70109	2.58711	3.84929
	1.69239	1.22004	3.27973	3.27781
	1.32144	3.11422	2.29979	2.87792
	1.71796	2.59226	2.56486	2.18764
	2.18882	1.64418	4.50732	2.51179
	0.774115	1.32437	3.53722	1.62236
	1.50837	1.76824	4.26262	3.93586
	3.32088	3.08821	3.60641	4.02717
	1.64214	2.8806	3.46052	2.3564
	1.05993	2.89876	3.87145	3.01287
	0.840694	1.07142	4.09671	3.42078
	1.61753	2.1419	2.35048	3.26177
	2.97121	1.86563	3.29504	3.98918
	2.39039	2.14713	3.10799	3.46234
	1.67806	1.90662	2.59802	3.84463
	1.56656	1.52134	4.45582	3.10726
	1.0244	2.14738	2.33483	2.03545
	1.67241	3.48618	3.56463	3.05545
	1.59776	2.75661	3.04039	1.64549
	1.40056	3.00946	2.78992	3.5651
	0.997049	1.73293	2.03286	3.26912
	1.39636	1.66533	2.96364	3.47163
	1.17561	1.63776	3.1107	2.8003
	2.22834	2.21055	4.05963	2.69744
	1.80125	1.57369	4.58855	3.53055
	1.495	2.63807	3.44275	3.41666
	0.53538	1.60115	4.25994	2.52633
	1.97533	2.17847	3.84996	2.5515
	1.67562	1.55815	2.92039	3.10061
	2.58765	1.56337	4.05859	3.46484
	2.09267	3.1465	3.10436	1.16323
	1.58912	2.84188	4.04079	2.63683
	2.30603	1.79627	2.65964	1.84184
	0.90182	1.44109	4.11524	1.01023
	1.73829	2.89646	3.89465	4.04952
	1.42394	2.14575	4.19766	2.38068
	0.575154	2.8853	2.67495	4.05423
	1.21696	2.40602	1.32162	2.09315
	1.57232	2.4257	3.88108	2.98604
	0.704534	0.94937	2.47108	2.74451
	1.81787	2.93181	3.62732	3.294
	1.16386	2.06978	3.5145	2.7918
	0.917026	2.28956	2.29661	3.93602
	1.39553	1.92517	1.94	3.02872
	0.724449	2.42688	2.98833	3.75081
	3.06798	0.898588	2.75531	3.21795
	2.12821	1.77984	3.36697	2.5547
	2.11005	1.72129	4.35322	2.75286
	1.20962	0.831697	3.52554	2.31556
	0.913565	2.7197	3.38764	3.48773
	1.84108	1.2358	3.3169	3.31853
	0.595338	1.87676	2.27995	2.70791
	2.07438	2.63756	4.35854	4.17916
	2.26598	0.880115	2.05486	2.68724
	2.26398	1.52765	3.75191	2.19801
	1.65871	1.80706	3.42324	2.88805
	2.23325	1.5872	1.3598	3.55428
	1.97249	1.74185	1.86322	3.48257
	0.727066	1.69349	2.79142	3.65828
	2.23829	2.65672	3.85827	2.93906
	1.18487	2.73537	2.24702	3.22809
	1.83466	1.18423	2.02669	4.12612
	1.00759	1.67141	3.33251	1.85322
	1.96243	2.23555	2.74351	1.2656
	2.10773	2.38553	2.17564	2.93091
	0.827458	2.15506	3.08222	2.99937
	2.06485	2.48686	3.49007	2.39067
	3.23583	1.16517	3.35513	1.87626
	1.57832	1.57546	1.13451	0.604945
	0.985708	1.32164	1.59538	2.84415
	1.04566	0.87916	3.60562	3.52964
	0.571452	2.07984	2.2461	3.53133
	0.423996	2.62411	3.70915	2.78173
	1.4947	1.82966	3.82461	4.21055
	1.65614	2.21915	2.17057	3.65232
	3.06882	3.43367	4.27255	2.28802
	2.43729	2.26705	3.89678	4.29384
	1.51463	2.14033	2.28538	3.91315
	1.55656	3.07888	2.7264	2.69665
	1.34935	1.7693	4.15289	3.36882
	1.69661	2.00504	3.32205	1.75246
	2.04545	2.26727	1.85493	3.90579
	1.44784	1.5845	1.2347	3.45474
	1.40336	1.84672	0.835581	4.5408
	1.41097	1.4757	1.72354	1.66011
	0.880773	1.94356	2.74833	4.03837
	0.885237	1.79481	3.68886	0.604086
	2.1803	1.80116	2.40987	2.76907
	2.12009	2.52172	4.01679	4.38283
	1.50702	1.28027	2.94396	4.40619
	0.546247	1.04577	4.26178	3.3516
	1.77507	1.95633	4.25666	2.02591
	1.6057	2.2055	4.42664	3.8271
	2.52577	1.77911	3.55657	3.23943
	1.75262	2.48096	3.32362	3.48421
	2.05828	1.0427	2.16709	2.79186
	1.57454	1.62183	2.33761	4.37228
	2.33354	1.32546	2.64469	0.765623
	0.91459	1.38553	2.11458	3.51101
	1.86036	3.47764	2.41648	2.68565
	1.1845	2.81402	4.25468	3.56352
	0.699603	2.41757	3.45628	2.38942
	2.99541	1.47644	3.44422	3.94694
	1.40956	3.32344	3.50842	2.231
	0.631889	1.66095	3.10717	3.72695
	1.16799	2.73942	4.40244	3.91986
	1.52092	1.87086	4.00252	2.59127
	0.743292	1.6496	4.13197	3.75823
	1.76687	2.23539	3.33217	1.87832
	1.00924	2.62872	2.4197	3.27953
	1.10405	1.28183	2.97962	2.77616
	0.96892	1.48543	2.68038	3.06937
	0.963136	3.01695	4.48633	3.84772
	1.27714	0.909512	2.40515	2.88645
	2.25365	1.91485	3.62901	3.89027
	1.88719	1.0562	2.81173	3.47977
	0.813179	1.47993	3.75967	2.10929
	2.23486	1.55125	3.72116	2.86641
	2.01956	1.72826	1.64232	2.31332
	2.08087	2.1427	1.99073	1.70657
	2.03716	1.29901	2.9671	3.96949
	1.76442	2.44273	3.82834	3.66087
	0.557169	3.28781	3.10785	2.73961
	1.90556	2.01674	3.98488	2.32516
	2.17801	1.46751	3.69094	1.37321
	2.3107	2.86551	3.94762	3.46736
	1.65909	3.00733	4.1608	3.05528
	0.622716	2.0472	3.11227	3.83513
	0.409094	2.47354	4.14602	3.57684
	1.52274	1.36169	4.3989	3.17292
	1.0721	1.37943	3.03721	3.24608
	1.49573	2.61742	3.91709	1.87118
	1.96458	2.05323	4.33657	3.08421
	1.25311	2.61363	2.54063	1.54958
	1.57961	2.0658	1.46904	3.47042
	2.06755	1.17768	3.64816	3.01569
	0.731121	1.99344	3.36657	3.55977
	1.52337	2.35871	2.23993	3.36233
	3.24463	3.0854	2.74342	2.48497
	1.66572	1.9455	2.8451	3.58742
	1.04264	1.98016	1.8535	3.12166
	0.895071	3.51422	3.3579	2.39896
	0.868567	2.14803	4.44623	2.42633
	2.99714	2.19248	3.26269	2.90962
	1.76029	0.786722	3.09883	3.44426
	2.33685	2.47786	3.04293	1.22205
	1.69127	2.93305	4.46319	2.53165
	1.48302	1.19786	2.15598	1.78165
	2.48367	1.74662	1.74354	2.28585
	0.986337	2.34679	3.37155	4.23991
	1.72838	0.879693	3.23898	1.98552
	1.47212	2.60451	1.56158	3.16286
	1.36693	2.20778	2.66647	2.72901
	1.68996	2.05567	3.5579	3.27348
	1.18658	1.52691	3.36148	2.46896
	2.31604	2.99223	2.1133	3.93989
	2.10035	1.42583	3.20164	3.02768
	1.43384	2.38655	1.13074	3.5101
	0.542446	1.41979	3.5367	3.21442
	1.8119	3.84657	3.25109	3.70536
	1.61025	2.61807	1.30742	2.28302
	2.05034	3.25779	1.61622	3.45522
	1.47262	1.06888	3.48618	3.42682
	2.15782	1.70632	2.00262	2.56709
	0.928518	3.27956	2.27689	4.03527
	1.73292	2.37683	3.6253	2.86035
	0.641521	1.4891	3.81235	2.15074
	2.77706	1.39923	2.17782	2.7849
	1.33432	2.94675	3.7954	1.02402
	0.606222	1.6369	4.35466	4.06108
	1.11313	2.69691	2.58995	3.93379
	1.52326	2.78401	2.54813	2.96314
	0.690157	0.883363	3.78835	3.03735
	1.75883	2.069	2.11004	4.3053
	1.03571	2.00202	2.67539	1.80503
	2.4286	1.85877	0.565002	2.85443
	2.16212	1.39361	1.66144	2.9893
	1.22205	0.819027	2.86342	3.023
	0.93518	1.76886	3.57894	2.24738
	1.03527	1.21699	1.86072	2.79562
	1.38788	1.51965	2.62336	0.655154
	1.66828	1.91327	4.87408	1.80744
	2.29359	3.33516	3.19592	2.76191
	1.84341	2.65294	2.98767	3.71969
	0.732123	2.8246	3.29091	3.5231
	2.0169	1.61409	1.97188	2.81171
	1.87708	1.56646	0.782079	4.32869
	1.96468	1.61616	4.28386	3.76363
	0.557028	1.94859	3.41949	3.64533
	1.85354	1.45741	3.6158	4.30736
	1.87749	1.87339	4.28119	2.24865
	2.2245	2.50192	3.59863	3.48375
	2.14295	1.52982	3.10503	3.33422
	1.57032	1.44021	4.36983	2.58497
	1.01028	1.49533	1.40093	1.51244
	0.908619	3.05016	4.037	4.46212
	0.455025	2.56719	4.40195	3.79705
	1.6121	1.6233	3.47726	1.75173
	1.50161	2.88868	3.53893	3.1366
	1.4409	2.76264	4.37846	4.21805
	1.31305	2.10058	2.36291	0.602411
	1.74517	2.39571	3.64215	2.48388
	2.07957	1.08995	2.8221	4.21827
	0.618143	2.81832	2.20255	4.37629
	1.5151	2.14721	2.53757	2.40311
	3.14522	2.10785	3.62398	1.98418
	0.751124	2.15116	1.98946	4.48873
	0.838902	0.795657	2.50343	3.52408
	2.82899	1.65511	3.39096	2.61665
	1.5485	2.0705	3.70882	4.44237
	2.39418	1.68119	4.33271	3.60516
	1.70784	2.56035	3.11838	0.784695
	1.87227	0.787456	4.1848	2.53913
	1.67532	1.19164	3.96511	3.41996
	0.85461	2.32463	3.88568	3.71293
	2.28021	1.83196	3.37915	2.79036
	1.6121	0.869896	2.36875	3.30318
	1.536	1.39763	3.09676	2.21399
	1.42762	1.7015	2.62963	3.92835
	1.43008	1.69698	4.20467	3.99251
	0.846554	1.58197	2.59782	2.37715
	1.18872	1.59998	1.42019	3.79885
	2.15491	2.36533	3.89113	1.97031
	2.0397	2.59322	2.38119	3.44789
	1.40023	1.067	3.68569	2.73776
	0.540975	1.52588	1.95746	3.08764
	2.06924	2.25742	2.97395	2.83543
	1.51145	1.40027	3.92923	3.79502
	2.21503	2.1292	3.09719	3.31562
	0.932064	2.39602	4.34355	2.94439
	1.74853	1.92603	2.99586	3.80172
	0.626895	1.2313	1.88385	3.3356
	2.97437	1.38152	3.28488	2.06836
	1.28811	0.828864	4.42131	2.77608
	1.15651	1.30025	3.44836	2.32855
	1.61934	2.08115	2.97199	1.6625
	0.743116	2.43696	3.0418	3.89559
	1.69006	2.06033	3.94898	3.77025
	1.0862	1.72078	4.11459	3.14172
	2.13733	3.23316	2.66244	1.42659
	0.919329	2.1199	4.01083	2.32687
	1.01996	1.97755	2.88225	2.95016
	0.658282	2.89836	2.21813	3.46547
	1.31791	1.70211	3.48686	3.06032
	2.25618	1.91177	3.35199	3.87629
	1.78601	2.10888	1.72999	3.50975
	0.777597	1.41397	2.82654	3.18137
	1.97166	1.7982	2.54781	3.09631
	2.22494	1.81919	3.49439	1.8339
	1.14551	1.42648	3.5985	3.05932
	0.532744	1.60703	2.40364	1.6223
	1.78276	1.57624	2.49602	3.33053
	2.03425	1.22526	2.64666	3.01846
	2.17971	0.992869	2.06581	3.57709
	2.08712	1.98199	3.43507	3.19022
	1.59751	2.5627	3.23845	2.48954
	1.59952	1.67317	3.18336	3.85108
	1.11858	0.954343	3.50139	3.02949
	1.52585	2.08769	3.29163	3.44094
	1.82251	1.41705	3.41419	3.42396
	1.99515	1.26057	1.49408	3.01519
	2.0465	1.34156	2.18427	2.82597
	0.712927	2.96727	4.33549	2.34502
	1.62788	2.61478	2.67139	3.45693
	3.16567	2.27985	3.88089	3.16819
	1.55206	1.56678	3.80215	2.3282
	1.01956	2.96495	2.06064	2.4647
	0.618462	1.56962	4.03941	3.05958
	0.420087	2.53896	4.12616	2.98588
	0.825191	1.77671	2.49345	1.23186
	2.81364	1.45053	3.53718	2.33295
	1.73735	2.05127	2.67372	1.82864
	2.34294	2.46027	2.23827	2.81947
	1.67537	1.27762	3.47057	2.11871
	1.4041	1.366	0.821467	2.67534
	1.30081	0.985464	0.560867	0.956862
	1.61888	2.94943	1.63367	4.28621
	1.637	1.78978	2.72052	2.26729
	1.44307	1.44093	3.8149	4.17047
	1.44704	1.62166	1.92343	2.15618
	1.38352	2.08214	2.56639	3.11435
	1.02323	1.17066	4.31455	2.66592
	0.76946	2.55032	2.92625	3.04931
	1.19268	1.68749	4.31202	2.23875
	2.20604	3.02973	4.37237	2.6637
	2.07633	1.48741	3.67189	2.02548
	1.36448	2.71715	3.51791	3.41119
	0.539256	2.68738	3.00557	3.58323
	1.9072	1.8983	1.29609	2.52576
	1.43315	1.28445	3.3435	4.22905
	2.37106	2.32951	1.90157	2.0721
	1.86929	1.34684	2.44592	3.61744
	1.51747	2.43884	4.31636	3.24639
	2.00724	2.04969	3.30986	3.72258
	0.921244	2.56082	3.76215	2.92414
	1.6797	1.66436	4.17251	3.09739
	1.2338	1.12081	3.42964	4.37203
	0.563556	1.84619	3.08797	2.4971
	1.16376	2.23528	4.53296	1.83629
	1.47732	1.93795	3.32421	1.39186
	0.667733	2.8909	2.35713	2.93574
	1.70685	1.87716	3.09046	4.07092
	1.05173	3.11633	2.68613	4.30958
	0.976751	2.00723	4.51547	0.734151
	1.24676	2.03353	2.45984	2.45664
	0.666459	0.722078	3.61917	0.593525
	2.83644	2.42898	2.08988	2.79128
	1.96168	1.07201	2.91179	2.03027
	2.21868	1.28188	2.49087	3.73909
	1.08054	1.4033	3.30237	3.37103
	1.99263	3.15073	4.28272	2.70912
	0.987916	1.18207	3.74578	4.32838
	0.569593	2.36582	3.36267	4.02585
	1.76469	2.54511	4.02058	3.88826
	1.86617	2.76426	2.8367	4.02647
	2.04474	0.955337	4.16824	3.82458
	2.16558	2.29492	3.88104	2.74322
	1.62451	2.18318	4.20361	3.41726
	2.30002	2.02107	3.87647	2.60699
	1.68704	1.48594	4.11204	1.46125
	0.824914	2.53393	2.58567	4.49263
	0.424005	1.49273	1.38972	1.66203
	1.35598	2.64758	3.78275	3.3127
	1.72961	1.43024	4.07956	3.84905
	1.95936	3.88727	3.84376	4.10254
	1.26321	2.91821	1.54877	2.62771
	1.5867	3.27848	0.969528	0.613193
	2.03245	2.12844	4.04028	3.51523
	0.621433	1.74118	2.98789	2.78636
	1.23745	1.03814	2.29488	1.92433
	1.54428	2.34645	2.96676	3.80167
	3.12814	3.27414	2.4768	3.60793
	1.00445	1.58317	1.99181	3.01456
	0.924771	0.996607	3.21717	4.31298
	0.735738	2.91706	4.35172	0.784777
	0.904783	1.60617	3.50807	3.64316
	2.76423	2.72808	2.96198	2.67662
	2.32162	2.95201	2.94926	3.58812
	0.704377	0.875468	4.29829	3.45347
	1.5503	1.96768	4.02158	3.70278
	1.59994	2.13757	2.82304	2.34647
	1.36479	2.06331	4.38716	3.91661
	1.42525	1.98705	2.33342	2.53266
	2.30762	1.21373	2.74794	3.67732
	1.56417	1.90434	3.45961	1.84325
	1.33872	1.81591	3.347	2.93995
	1.43342	1.43499	1.58082	2.74704
	1.38865	3.13085	1.9264	3.01839
	0.811767	2.61182	2.79967	3.56636
	0.76958	2.85228	3.68639	3.65224
	1.17436	1.58412	2.22431	1.85638
	2.11097	1.54264	3.54414	3.11255
	1.69241	2.1049	2.01628	3.81906
	1.38303	1.61807	3.19828	3.27364
	0.523799	2.23022	3.25751	2.09644
	1.77383	2.43969	3.27961	2.91048
	1.79861	2.06104	1.29784	2.32606
	1.49806	1.60221	3.51226	3.77456
	0.820743	1.2938	3.3339	1.61656
	3.00192	1.51859	1.2341	3.7689
	0.884101	3.03753	3.37606	2.7121
	1.67611	2.27566	1.55704	2.21889
	1.30609	2.59105	2.14217	1.32106
	0.599763	1.35913	2.25461	3.10438
	0.999427	1.63235	3.81601	3.78448
	1.55414	2.82546	3.71136	3.35713
	0.664524	2.69871	2.0841	3.16816
	1.56404	2.01319	4.3285	3.11702
	0.934518	1.98238	4.18296	1.79063
	0.865543	2.1212	2.42275	3.25754
	1.25119	1.06558	3.52513	1.52178
	0.593036	2.72003	2.65189	3.28046
	2.75736	1.10191	2.289	3.02768
	1.91671	2.12771	2.61689	3.21112
	2.13627	1.98467	0.885629	2.35884
	1.04253	2.34276	0.70542	3.87163
	2.0164	1.61684	1.60003	3.14932
	1.01957	2.08628	2.71495	3.59334
	1.63543	1.38329	3.67171	3.51133
	0.544482	2.47809	2.03247	3.24937
	1.7743	0.795542	2.77321	2.43243
	1.89441	1.19229	4.14327	3.3909
	2.07923	1.93382	3.08274	3.38957
	1.568	1.76842	4.24109	3.21926
	1.64911	2.40476	3.71173	2.33079
	2.15412	0.860715	3.65145	3.29233
	0.658005	1.36298	3.07045	2.28939
	1.99233	1.65987	1.45696	2.90896
	0.864313	1.55827	2.93595	1.19212
	1.77562	1.66893	1.89478	2.376
	1.84428	1.73087	4.29258	1.81895
	0.690673	2.61782	2.55957	4.3348
	1.18981	2.26589	3.33341	2.67659
	1.5035	1.16673	3.5921	2.09718
	3.13499	1.4445	3.54437	2.68945
	0.963279	1.34914	3.03754	1.47943
	0.60275	2.22193	4.53541	0.916273
	0.440582	2.03176	4.32111	4.125
	1.24932	2.35495	2.3566	2.1417
	0.999497	1.26094	3.0715	3.95676
	0.961429	1.49174	2.67271	1.95931
	2.72987	0.801558	4.28255	3.21565
	0.692716	1.29007	3.85002	2.61946
	2.31743	2.09209	2.28255	2.27046
	1.39307	2.51769	3.01139	2.87827
	1.39346	2.1608	2.13483	3.07228
	1.28022	1.80468	2.57251	2.63905
	1.19965	2.96833	3.34302	2.21932
	1.50525	1.88195	3.48377	3.46898
	1.88314	2.17966	3.8466	2.30016
	1.55888	2.96358	4.62805	3.56143
	1.4607	1.5785	3.95931	2.60782
	1.35212	1.88975	2.97711	3.72772
	1.3905	1.84751	4.26515	4.0373
	0.737869	2.031	3.99097	2.11872
	0.736857	1.42314	4.26018	3.68526
	1.11828	1.62583	3.25144	3.3819
	2.02293	1.55888	4.23263	3.86778
	1.70326	2.42822	2.62356	2.94965
	1.33343	1.30791	1.44074	3.25495
	0.534551	0.989249	3.57816	1.75107
	1.64642	2.20012	4.29209	4.30948
	1.43393	1.71118	3.87538	2.51002
	2.2897	0.987465	1.56206	0.621836
	1.74775	2.19412	4.07006	2.54636
	1.46198	1.45515	3.05311	4.14895
	0.848677	1.27428	1.91585	4.52949
	2.91242	2.83242	3.53283	2.45267
	0.858364	2.80486	4.58896	0.821365
	1.55954	2.32994	2.9979	0.736393
	0.548284	2.34227	3.4411	2.68994
	2.75187	2.9616	3.13799	1.79467
	1.21536	1.48092	2.65739	3.59139
	0.644172	1.52297	3.99873	3.4907
	0.995356	1.66917	4.35087	2.59952
	1.42602	1.45126	2.93824	4.40142
	0.673571	2.02106	4.24187	3.69659
	1.65597	2.36738	2.34035	3.48157
	1.00384	1.40064	2.88842	2.89721
	1.14883	1.42012	3.38334	3.81748
	0.962566	1.07814	3.54668	3.42229
	0.590073	2.93385	1.73375	1.42446
	1.17334	1.86727	2.77818	2.58962
	1.60926	1.05143	3.59726	2.45187
	0.750671	1.32154	3.40837	4.51592
	1.76232	1.67552	2.48962	1.53175
	2.15479	2.01467	3.02153	2.48253
	1.06069	1.22487	2.64494	3.92233
	1.85149	2.18906	2.08774	4.0783
	1.78841	1.57102	3.24617	3.74255
	0.514418	3.04953	3.33435	3.32758
	1.6705	1.47683	3.36346	2.80541
	1.80285	2.669	3.49351	1.91326
	1.80415	2.61363	3.33872	4.87436
	2.02076	2.04109	1.15798	3.5682
	1.61292	2.34872	1.48063	2.61803
	2.0786	1.27806	3.70782	4.2557
	0.596118	1.34156	2.15784	2.46227
	0.427882	2.41403	4.3749	0.697067
	1.22301	2.01351	2.13297	3.79196
	1.03152	2.56896	4.11505	2.18831
	1.70883	1.64719	3.83706	2.88883
	0.967009	1.12352	2.12627	3.34105
	1.79426	0.816637	4.19042	3.45974
	1.2742	1.87783	4.32295	4.00071
	1.62775	2.19983	2.15935	2.34533
	1.91101	2.78036	3.88947	2.39843
	0.665502	2.02457	2.87204	3.9775
	1.1846	1.967	2.44345	1.89179
	1.59701	3.29534	2.61275	3.18197
	3.03018	2.08192	3.01537	2.85236
	0.952269	1.74859	0.831243	3.08118
	0.909053	2.16944	0.659455	3.79251
	0.739335	0.747188	1.5765	2.34106
	1.13055	2.43874	2.75841	2.98741
	2.67792	3.12523	3.65832	3.81695
	0.683489	1.35205	2.09874	3.32641
	2.20801	3.9164	2.28149	2.04308
	1.32714	2.4181	4.82937	2.99686
	1.5852	0.90336	2.94296	2.37869
	1.37586	2.72394	4.0395	1.8211
	1.74135	2.20709	4.21091	4.1445
	1.40501	1.8176	3.70007	3.79647
	2.13383	2.36471	3.52859	1.29503
	1.48833	1.43668	3.01539	3.35926
	1.34517	2.36661	1.34364	3.24526
	1.34466	1.50454	4.23615	3.82127
	1.31014	2.55899	1.46681	3.53891
	0.759252	1.42442	3.67139	3.1114
	0.701903	3.71874	3.90803	3.03115
	1.10391	2.80846	3.50207	1.77368
	2.22459	3.06197	3.06639	3.24252
	1.65461	2.1053	4.537	1.43811
	1.2374	1.06614	2.63055	3.41417
	0.502161	1.68715	4.28143	3.11653
	1.8578	3.33157	3.29125	3.09813
	1.41172	2.51301	2.35105	3.44965
	0.880537	1.55073	2.69353	2.31147
	2.94786	1.26177	2.16635	3.33881
	0.903185	2.8016	2.51339	3.11998
	0.680278	1.59617	2.31732	3.41846
	1.5411	2.46958	1.67808	2.34453
	2.72238	0.896277	4.21529	2.95416
	0.776342	1.89849	3.26814	2.24945
	1.12635	2.01965	3.76287	3.22703
	1.06071	1.86572	3.8144	1.3416
	1.43413	1.4727	2.98519	2.46317
	0.641309	1.15274	4.12466	1.68061
	1.66978	1.95134	3.88798	2.26489
	0.941649	1.30547	4.02819	0.893752
	0.951875	1.69334	3.22935	3.94464
	1.12782	3.15616	2.44233	2.096
	0.578532	2.62349	3.10246	3.97557
	1.73463	2.79218	1.52197	1.94232
	2.13469	1.54158	3.78857	3.01838
	1.06291	1.49035	4.04016	2.59619
	1.74281	1.58729	3.7549	3.24714
	1.03716	2.08677	1.54406	3.93635
	1.57923	2.01626	4.2698	2.46822
	0.52067	1.86815	3.04019	3.08744
	1.65507	2.56958	3.36142	3.62139
	1.79229	1.54397	2.95185	2.71882
	2.04478	1.29238	2.35915	2.17943
	1.54154	1.50537	1.96273	3.45167
	1.58737	2.91691	3.46018	2.29429
	2.01983	1.57053	4.34264	3.45232
	0.768573	2.72198	3.27796	2.55064
	1.34014	1.35166	3.31799	4.41195
	1.03244	2.74317	2.93672	2.72163
	1.44539	2.48763	2.43272	2.02512
	1.7364	2.03937	4.09413	2.83957
	1.6692	1.96113	2.87215	3.48752
	1.45879	2.44205	4.03268	2.09748
	1.89149	1.13931	4.33053	3.96407
	0.652837	2.56483	2.5569	2.9091
	1.31783	1.71339	4.33686	3.03704
	1.53328	2.02927	2.42018	1.66711
	2.9947	1.12568	2.92209	4.50693
	0.928079	2.37359	3.53271	2.39712
	0.563731	1.60852	3.4019	2.24272
	0.425528	1.87293	1.5957	2.99566
	0.734099	2.53044	2.63462	4.28799
	1.08705	0.757641	1.75662	4.26695
	2.70703	1.86277	3.91572	2.5642
	0.708236	1.01756	3.67239	0.782766
	2.13515	1.72144	2.32936	0.664955
	1.39641	2.40292	2.12253	2.36501
	1.51217	0.764202	3.23945	2.88254
	1.30787	1.26331	3.35677	3.74842
	1.22482	1.67375	3.34618	3.61393
	1.39858	1.53676	3.45333	2.61711
	2.10472	1.57174	3.22797	3.75185
	1.45428	1.5202	1.12338	3.84777
	1.32219	2.40212	1.34722	4.22815
	1.40685	2.09544	3.86592	4.14286
	1.40665	1.19513	2.20782	3.31247
	0.893333	1.52438	2.17641	2.93047
	0.684669	2.19968	3.68753	3.39368
	1.15195	2.22706	3.60306	1.43944
	2.08469	1.12107	2.04183	2.48933
	1.51818	1.9496	4.2962	2.48479
	1.23651	0.799957	4.07993	4.53069
	0.524654	1.35013	2.2539	1.54939
	1.64488	2.22987	3.38779	2.21198
	1.78543	1.25971	3.04986	3.65913
	1.45556	2.09723	2.30011	4.11015
	0.847057	2.30392	2.56256	0.63965
	3.0179	2.08743	0.698126	2.40761
	0.953401	1.61743	1.65631	3.46437
	0.683228	3.11444	2.66451	1.9085
	1.43881	2.72689	1.35266	4.5066
	0.764552	2.13952	3.63245	3.12767
	1.11293	1.74615	2.18989	3.51677
	1.04831	1.5661	2.35579	4.20522
	1.45316	1.88764	5.04324	3.05998
	0.624085	1.78537	2.96861	3.72728
	1.56355	1.34086	3.65487	0.726954
	0.874299	1.81282	3.42052	3.56644
	0.876658	1.36218	3.06017	3.87218
	1.11212	1.96585	1.33093	3.34913
	0.545897	1.41891	3.38174	2.37102
	2.77527	1.57381	0.876463	3.89718
	0.746883	2.27615	1.7112	2.33605
	2.08974	1.1507	4.14449	3.86389
	1.1855	0.95028	1.1238	1.85791
	1.81551	2.15952	3.19114	3.16296
	1.13384	1.52837	2.99691	2.79814
	1.5598	0.919121	3.64204	2.96796
	0.500355	2.24517	4.20246	3.86687
	1.67319	1.46998	3.45537	2.4104
	1.7212	1.16175	4.57205	3.08653
	1.9396	2.80862	1.11681	3.8959
	1.53842	2.26787	4.28596	3.32594
	2.05204	2.64642	4.20578	2.91353
	1.47902	2.17128	3.00323	1.74293
	1.62961	2.94242	4.39637	3.81984
	1.35857	1.46082	3.23758	3.93626
	0.899868	1.49568	2.25685	1.33991
	1.42878	1.7464	2.71061	3.28058
	1.83337	1.50951	1.98071	2.14823
	1.70659	1.77494	2.4616	3.23318
	1.72959	2.34408	2.5236	2.73113
	0.641655	1.50222	3.33183	3.12639
	1.67677	1.3861	3.15182	3.53681
	1.28108	1.05717	4.68162	3.37386
	2.97593	2.867	3.96885	3.18313
	0.984793	1.76659	3.77993	2.96829
	0.973991	1.2932	2.95819	1.84416
	0.591309	1.34127	4.33205	3.20221
	0.458267	1.60427	4.20728	1.47229
	0.981373	1.97886	3.96467	3.35977
	2.61345	1.14876	3.27058	3.10333
	0.620373	2.40955	2.44982	3.63232
	2.00255	1.32429	2.67808	3.56759
	1.48831	3.11749	4.02149	3.10236
	1.52628	1.44859	4.14817	2.22504
	1.31258	2.62889	2.56306	3.8736
	1.25895	2.54442	1.39145	2.35172
	1.43995	1.88798	3.73088	3.28746
	1.41313	1.30904	4.02523	3.26598
	1.22611	2.23307	3.80867	1.34335
	1.30004	1.17057	1.40582	2.30437
	1.48891	2.36578	0.735605	1.60189
	0.649347	1.84725	3.06232	2.19637
	0.691067	2.56825	3.93063	2.22919
	0.652618	1.66849	2.44437	3.97202
	1.95589	1.74655	2.38612	1.80893
	1.18605	2.10928	2.95106	2.82451
	1.48672	2.66802	1.9216	2.56727
	1.20586	1.83788	3.23473	3.0537
	0.51911	1.77941	4.64352	2.4342
	1.74327	3.32178	3.27921	3.94527
	1.31555	1.8666	3.20376	3.08028
	2.02482	1.97594	3.12514	3.65678
	1.81105	2.35736	2.29722	3.12066
	1.38756	0.714751	3.94522	3.4418
	0.908294	1.12223	4.29896	2.20904
	3.20588	1.22267	2.69372	3.5092
	0.834802	4.00749	4.28774	1.93616
	1.55466	2.33744	2.44669	3.45313
	0.542616	2.3181	2.71349	2.6233
	2.72225	0.804972	3.56175	2.67625
	0.772042	2.156	3.61342	4.32744
	1.14429	2.18043	1.7202	1.95831
	1.02336	1.85785	2.48001	2.85417
	1.38286	1.37675	2.04195	1.50046
	0.674066	2.38395	3.84475	0.938211
	1.66703	1.45086	3.40004	4.07649
	0.937547	1.37555	1.94266	3.01246
	0.90478	4.09734	3.35904	3.10538
	1.07978	3.05626	3.32025	1.57686
	0.837014	2.03663	3.1757	2.74591
	2.09641	2.86445	1.17118	4.19506
	1.1787	2.52377	3.55201	2.22023
	1.80426	1.52177	3.20417	2.94297
	2.00037	1.15287	1.4464	3.09027
	1.16268	2.61223	3.71985	2.28053
	0.537808	1.51299	2.39343	2.61404
	1.5562	2.44877	1.98916	0.624335
	1.66711	2.58444	3.59713	2.91852
	1.73473	0.881544	3.65424	1.63245
	1.98516	1.77677	2.03582	3.79511
	1.54483	1.97516	4.04568	3.37467
	1.93054	1.87082	3.94378	2.52368
	1.4842	1.43495	2.19426	4.26364
	1.04415	3.02482	3.32857	3.75609
	1.37367	1.28046	2.87165	3.7988
	1.63267	1.19386	2.22628	4.3045
	0.967167	3.01605	3.08913	2.00697
	1.66442	2.61108	0.845752	3.36596
	1.73505	2.67656	0.676428	3.63352
	1.47912	1.44253	1.58243	3.78288
	1.81646	1.42326	2.76128	1.52341
	0.691648	1.56629	4.02997	2.44895
	1.46957	1.91263	2.15541	2.45796
	1.34142	1.58298	4.87418	1.39549
	3.01248	1.36161	2.67912	4.61943
	0.970546	1.33686	1.18366	2.41141
	0.640683	2.23268	4.01545	3.76927
	0.454654	1.93073	4.35229	4.00555
	0.774385	1.59077	3.43113	2.54811
	2.64627	2.8698	3.37815	0.65531
	0.593199	1.06086	2.73863	4.16404
	2.04365	1.59804	1.20312	4.36194
	1.57836	1.85466	3.36348	2.43167
	1.45461	1.83167	1.64457	0.750387
	1.34052	2.36099	4.20682	1.86253
	1.2859	1.06351	1.10282	4.64682
	1.92282	2.47149	2.98649	3.60945
	1.45018	1.69297	4.1324	2.76746
	1.28894	1.92415	2.96579	4.15287
	1.31771	2.28906	3.32677	2.2325
	1.47009	1.50102	3.49044	0.733409
	1.34132	0.79333	4.42025	3.40004
	2.05341	1.86991	3.75755	3.47828
	1.15791	1.16671	3.24965	2.94055
	1.55567	1.90135	2.34482	4.24603
	1.18215	1.74984	2.41107	3.45323
	0.531494	2.36501	2.74322	3.69726
	1.62719	0.713781	4.39909	2.30508
	1.45887	1.0005	3.19081	3.87393
	0.796233	1.70457	2.3029	3.836
	1.74788	2.26967	2.71721	2.36275
	1.42942	1.27884	1.9211	1.79264
	0.896501	1.1928	2.35275	3.15771
	3.06612	1.50099	2.38865	2.76642
	0.832062	1.63633	3.98186	2.55518
	1.45454	1.41514	3.42068	3.14676
	0.684065	2.423	4.27902	3.91962
	0.524944	2.08566	3.3648	3.43589
	2.59169	1.32419	3.73681	2.27399
	0.759664	2.1775	4.16838	3.09807
	1.10018	2.21307	2.9629	3.92514
	1.00799	1.49334	4.23262	3.29973
	1.36994	1.62032	4.02336	1.82398
	0.674468	1.38226	3.78801	2.89919
	1.64553	2.67924	3.83636	2.08414
	0.879526	2.40561	2.64227	1.67504
	1.74066	1.93998	4.16008	4.05404
	1.21332	2.27693	1.36223	3.92564
	0.929127	1.89564	3.68932	1.45706
	0.55389	0.785628	3.72526	2.10502
	1.14753	1.37165	3.71103	2.47533
	1.83862	1.27595	1.38989	3.20419
	1.46406	1.95207	2.94822	2.99045
	0.74717	2.34184	3.5082	3.85287
	1.98226	2.14919	2.50122	3.38723
	1.10698	1.46994	2.82148	3.60368
	1.86011	2.87657	2.33462	0.957215
	0.518503	2.81519	1.78285	2.8593
	1.52251	2.0076	3.13993	1.8162
	1.61026	1.84387	4.28092	3.46229
	1.68793	1.48159	3.04302	1.4673
	1.95305	1.95717	3.29813	3.37923
	1.51318	1.75265	2.84945	2.99539
	0.906415	1.27379	2.189	3.63963
	1.33879	1.68317	4.06775	3.14998
	1.77979	1.35764	4.34801	3.65642
	0.951974	2.06968	2.29797	2.99417
	1.59343	1.39571	4.2243	3.70894
	1.64719	1.41645	2.58739	2.22715
	1.74052	2.18622	2.76166	2.83358
	0.701519	1.13835	3.60336	3.46954
	1.32488	0.948239	3.58362	2.98229
	1.54217	1.7818	1.83109	2.40354
	2.8569	1.59204	2.59106	2.17995
	0.924638	2.08298	2.13091	3.50826
	0.60711	0.938757	3.65759	3.03054
	0.437103	2.08012	2.10515	1.32239
	0.775169	1.36914	3.21067	2.29759
	2.54418	1.25123	3.14894	1.64642
	0.653866	1.3452	3.32673	2.22675
	1.55594	2.77702	1.33191	2.73911
	1.91725	2.22905	3.32512	0.948171
	1.44295	2.42882	3.23551	4.06666
	1.21425	2.15698	1.18513	2.14053
	1.20213	1.38311	1.52548	4.3079
	1.42287	2.91623	3.74701	1.85927
	1.85955	1.45503	2.08714	2.75853
	1.36331	1.90382	3.71965	2.53036
	1.18198	1.42653	3.63152	3.22036
	1.11339	1.74628	2.01023	3.93525
	1.57934	2.28416	4.00729	2.39487
	1.46049	1.50894	4.13192	3.18652
	2.09613	1.47808	2.38498	2.48997
	1.07265	1.06588	3.58186	2.32895
	1.53123	1.73273	2.66044	3.42179
	1.16983	2.70879	2.18074	3.46137
	0.522482	1.65503	2.92393	2.70292
	1.55679	1.03148	3.35006	4.36095
	1.53917	1.16321	0.803215	2.48213
	0.832154	1.15354	1.60861	1.93985
	1.69305	1.60776	0.636719	2.08818
	1.32589	2.01114	2.63699	3.34278
	1.47812	1.23234	3.96564	3.62984
	0.811694	2.935	2.03361	3.93993
	1.4252	1.39252	2.15961	2.77071
	0.651747	1.32202	3.78106	3.16222
	0.570092	2.34455	2.94961	3.27962
	2.58163	2.3479	4.01664	1.57764
	0.776256	1.91666	4.10276	4.21054
	1.09065	1.00041	3.51648	2.38411
	1.51458	1.16232	3.42858	2.07784
	0.936377	2.07779	2.6977	4.32673
	0.657151	1.21627	1.3774	4.24236
	1.39698	2.48428	2.3701	2.32732
	0.857828	1.86068	1.73773	0.879989
	1.79764	2.48159	4.0324	0.639216
	0.586265	1.62026	2.28261	1.63349
	1.0319	1.07728	2.93514	2.6824
	0.953954	0.796825	3.46484	3.49254
	1.08984	1.74501	3.39688	3.34498
	1.49204	1.9935	4.23608	2.68924
	1.79795	2.55623	1.13333	4.3499
	0.757163	1.77167	4.04191	4.01154
	0.540994	1.74185	3.99765	4.37736
	1.96408	3.07118	3.11896	3.87834
	1.08979	1.70062	2.28784	4.09265
	1.35545	2.00534	2.30553	3.14176
	0.516895	0.714392	2.63121	3.56226
	0.768889	2.30414	4.24535	1.4488
	1.73783	1.33579	2.18223	2.4722
	1.89296	2.23512	3.33307	2.37424
	1.52278	1.75341	2.78916	4.54961
	1.85284	3.09679	2.08406	1.48881
	0.647179	1.33681	2.20433	2.60321
	0.407076	2.61529	2.81803	4.1146
	1.0082	4.39731	3.9531	4.15077
	1.29141	0.882263	3.35856	0.779476
	1.55918	2.08462	4.32274	3.32656
	1.28727	2.00402	3.01966	2.94722
	0.857216	1.78182	3.70331	3.76212
	1.59402	1.36583	3.83327	3.47286
	1.34184	2.41774	2.84669	1.85578
	1.75696	1.39688	4.05502	3.89783
	0.72845	1.26024	2.24092	1.68498
	1.71375	1.86319	3.74949	3.60758
	1.33578	3.52404	2.63403	3.98179
	2.72698	2.68765	4.0913	2.79902
	1.09466	2.97178	2.51169	0.744349
	0.901359	1.88153	4.18366	3.67244
	0.743323	1.64832	1.25324	0.83459
	2.55942	1.04331	3.64034	3.43417
	0.587349	1.30525	3.99068	3.44612
	1.92015	2.72436	3.54103	2.55236
	1.47843	1.43113	1.35776	3.24145
	1.43324	1.16826	3.36701	3.44973
	1.29327	2.29414	2.42575	2.38986
	1.14056	1.52612	2.8663	3.82992
	1.85247	2.39168	2.27651	2.45482
	1.27611	2.82168	1.67658	4.0288
	1.23731	0.767914	3.05239	1.84828
	1.19148	1.73897	3.05366	2.92997
	1.56435	1.86025	3.26772	2.82206
	1.38375	1.79512	4.40825	2.6242
	1.02031	0.850028	2.75751	3.69573
	2.06099	1.66246	3.84518	2.3509
	1.48892	1.62552	2.24186	3.22553
	1.18625	1.18429	4.26522	3.87781
	0.496342	1.20175	2.57388	3.44289
	1.81656	3.23634	2.63535	1.69548
	1.31228	2.64681	3.41636	2.95616
	1.60701	2.55711	3.42216	2.12409
	1.385	1.38964	2.26707	1.61212
	1.55982	1.40222	1.73363	4.18744
	0.862591	1.51322	3.57737	3.94419
	0.662442	1.9689	2.84862	1.81941
	1.47904	1.97867	1.83956	2.04258
	0.659677	1.5452	3.23871	3.05549
	2.45884	1.80059	3.20044	3.77437
	0.741336	1.40543	3.12436	3.58304
	1.17726	2.18133	1.19645	3.40751
	1.51934	1.54992	3.4141	1.0167
	0.874866	2.65942	3.21192	3.08674
	0.648367	2.28686	1.10334	1.84406
	1.33075	1.52811	1.41348	3.29217
	0.793769	1.36625	3.84752	1.39344
	0.552818	1.92847	1.88549	3.5298
	1.00777	2.51904	3.56574	3.01047
	0.569534	2.33837	3.59621	3.97698
	0.559963	1.80103	1.8529	3.12019
	1.93791	2.2047	4.39066	2.37632
	1.14273	1.05053	4.10295	3.4965
	1.68795	2.45588	2.06129	3.56941
	1.59623	1.86615	3.13617	2.93943
	1.16034	1.7375	2.70114	2.16743
	0.901694	2.17137	2.1708	2.81062
	0.692457	1.80484	3.38603	3.03528
	0.527459	1.49359	0.986581	3.46112
	1.61977	1.59839	1.52882	2.6037
	1.93249	2.23446	0.667054	2.11523
	1.48139	0.716136	2.5382	2.93991
	1.91178	0.967035	1.26152	3.0513
	1.51208	1.55236	3.74381	1.40236
	0.749778	0.7835	2.01812	2.31974
	1.55394	1.1383	2.06053	1.59008
	1.35596	2.41276	4.70326	2.14215
	0.883744	1.61886	2.88693	2.82241
	1.62711	1.39281	4.23688	4.18136
	1.33959	1.34897	4.24894	0.927534
	1.80071	1.79483	3.48661	0.874725
	1.43784	2.32267	3.38445	4.27261
	2.74411	2.11058	2.62704	2.2519
	1.04384	1.31634	1.276	4.23389
	0.85447	1.32497	1.798	1.69256
	0.546646	2.0667	4.05894	2.74483
	0.452134	1.82673	1.26181	2.39694
	1.01614	2.04348	2.96253	3.11564
	1.19905	1.15069	3.62909	3.17012
	2.48904	1.95125	3.55027	2.25769
	0.595408	0.805851	3.37367	2.59577
	1.47674	1.30479	4.36399	3.42095
	2.02353	1.15389	1.18283	1.88981
	1.38097	1.81312	2.3195	3.66933
	1.29778	2.35893	2.6311	2.41392
	1.1476	2.14023	4.36552	4.61212
	1.43132	1.52599	2.28286	1.99406
	1.65404	2.82577	3.23522	4.27774
	0.721658	1.73536	2.56067	3.44435
	1.27633	2.6498	2.11147	2.13553
	1.22288	1.87493	0.734095	3.63339
	1.1312	1.49797	2.29037	3.89964
	1.54497	1.85631	3.44785	2.75334
	1.39135	1.75026	4.26236	3.26956
	0.603908	1.2485	4.07215	3.21375
	1.9419	1.70263	3.10816	1.51079
	1.13198	2.04876	3.70818	4.5098
	1.43713	1.41503	4.0666	2.39011
	1.1172	1.48402	2.83509	1.94202
	0.500183	1.42634	4.31108	3.07995
	1.68446	2.25597	4.03906	4.49553
	1.21507	1.07096	3.92468	4.43599
	1.78449	0.919834	3.13215	0.920058
	1.63537	1.78443	2.22363	0.648989
	1.27411	1.50648	3.64328	2.56558
	2.0989	0.980699	4.18928	2.72722
	0.691686	1.97016	2.43497	1.83291
	0.815914	2.25189	1.22784	3.72525
	1.41432	1.43981	3.66678	3.11317
	0.698215	1.37511	4.01143	2.5811
	1.09271	1.24349	3.9518	4.46761
	0.49224	2.65032	1.3874	3.86794
	2.48231	2.06734	0.746128	3.85894
	0.703566	2.32727	2.88419	3.62805
	1.10277	2.27	3.31116	3.29783
	1.54642	1.32886	3.47138	4.21996
	0.886246	1.42599	2.45793	3.4897
	0.651722	3.03337	2.82822	1.33933
	1.30609	2.0715	2.30336	2.32821
	0.833655	1.70195	1.63308	2.45746
	1.56755	1.39851	3.03778	1.4829
	0.592345	2.18478	4.43317	4.52007
	1.12615	1.40288	2.93927	4.0291
	0.945703	1.31149	2.94626	2.45257
	1.76206	0.901535	2.75	4.20833
	1.40229	2.77364	3.98745	0.679569
	0.581397	1.62857	3.99883	2.66499
	0.818789	1.02666	2.17839	2.85507
	1.9497	1.22873	2.7181	3.99435
	1.08062	1.29487	2.50103	3.52931
	2.36871	1.54724	4.22727	1.84772
	0.645964	2.07628	2.59609	1.89232
	1.32434	1.24699	2.82539	3.72004
	0.485731	1.0857	3.48798	3.56401
	1.63967	2.90627	3.41567	2.77893
	1.83332	1.34598	1.59113	4.23942
	1.47734	2.24988	2.4135	1.79196
	0.604121	2.50459	1.93336	0.762054
	0.421522	1.74612	3.46838	3.46149
	1.27334	1.19369	2.87828	0.751549
	0.990385	2.13203	1.84071	2.4776
	1.28893	2.3443	3.32679	2.00677
	1.3328	1.20185	3.48204	2.68442
	1.54092	1.84962	3.1896	3.14085
	1.2943	2.2653	1.13131	3.93344
	1.60177	1.49495	3.46363	3.51334
	0.658039	1.83116	3.10715	2.33382
	1.9082	1.9684	1.23389	2.22178
	1.44942	1.56472	1.43958	3.82185
	2.6043	2.73131	3.70213	1.78174
	0.929979	1.68531	2.04244	3.04942
	0.868446	2.98126	3.60146	2.64829
	0.790323	1.80885	3.55456	3.06306
	0.571173	2.02406	1.88301	3.55444
	1.80527	0.69615	3.85669	2.34225
	3.0955	2.20904	4.13225	3.13518
	1.36289	2.68242	2.16355	3.97468
	1.29021	1.22359	3.21692	1.71954
	1.25592	1.11409	2.66486	3.3978
	1.101	2.20042	2.17791	3.02196
	1.19896	3.70075	2.79604	2.1823
	1.25003	0.796132	1.22142	1.61582
	1.09089	2.06346	3.32802	3.94378
	1.52867	1.80391	1.54225	3.88989
	0.904318	2.06929	0.617181	1.91994
	1.4404	1.43935	2.70177	3.23536
	0.664287	3.64883	2.96217	3.81264
	1.98333	1.32006	3.66402	3.34195
	1.08991	1.9012	2.11777	3.67749
	1.36465	1.13196	0.957303	0.999441
	1.00081	1.94264	4.8846	2.91489
	0.534382	3.50081	2.89547	3.4564
	1.67687	2.59787	3.4756	1.73075
	1.24156	2.77244	3.15987	1.36406
	1.85492	2.03219	4.52276	3.57933
	1.51012	1.49461	4.40215	3.62933
	1.32479	0.940128	4.32656	3.58666
	2.22853	1.52821	3.67036	2.91822
	0.679229	2.58465	3.62493	2.21677
	0.781063	2.84167	2.06638	2.92716
	1.40949	1.35488	2.36429	2.92389
	0.661221	1.37084	2.29283	3.42235
	0.989529	1.2772	1.80592	2.3027
	0.483105	2.22876	4.18313	2.11789
	2.33232	2.16292	1.47605	2.90189
	0.709341	0.730379	3.56035	2.60287
	1.02385	2.4905	3.32504	1.36646
	1.45061	1.72988	3.84804	2.42509
	0.850883	1.73568	3.14466	1.57781
	0.57394	1.81682	2.28416	2.16838
	1.2919	1.32864	2.47241	1.01188
	0.837915	0.949437	2.51513	4.04605
	1.07474	1.67022	4.40621	0.919468
	0.833825	1.57597	2.18836	4.44115
	1.32584	1.68604	3.52577	2.20409
	1.72867	1.15375	3.06265	4.30292
	0.736078	3.13896	3.87181	1.5706
	0.533271	2.58799	1.45103	2.51174
	1.00588	1.33515	0.73661	2.62707
	1.87558	2.55857	2.92028	3.1948
	2.25099	1.38146	3.45694	3.9578
	1.3623	1.51882	4.13237	2.92747
	0.646235	1.40045	3.73361	2.16309
	0.5109	1.76358	3.14926	2.60883
	1.28422	1.18445	4.5189	2.16349
	1.61671	1.48188	4.09411	3.46573
	1.75381	2.14709	2.85468	2.01132
	1.46537	1.55051	4.28021	3.66272
	0.438949	2.75683	3.68419	2.41842
	1.15249	1.38021	4.36381	4.57091
	0.833804	1.70828	2.11588	1.90065
	1.33939	2.40381	2.8863	2.7625
	1.36357	2.13495	3.83652	1.61007
	1.47266	1.27649	3.9923	3.52002
	1.58455	1.67854	2.4172	1.91054
	0.687859	2.51295	1.10444	4.0613
	1.72075	2.22334	3.51818	2.66878
	1.40337	1.01747	4.03896	3.18474
	2.51443	2.22913	3.58024	3.2785
	0.972097	1.96063	2.06587	1.41637
	0.831445	1.59329	3.55144	4.08191
	0.635513	2.16255	2.59845	2.31983
	0.662752	1.65034	2.6764	1.98986
	1.58877	0.803865	1.67488	3.10591
	2.38082	1.46235	3.03748	4.56219
	0.606747	1.25665	2.70378	0.958679
	1.81377	1.48603	3.25137	0.645997
	1.26247	2.18718	4.50991	2.63394
	1.25349	0.67312	3.18512	2.83626
	1.13404	0.959614	2.71975	1.93163
	1.1244	1.45667	3.99345	3.84985
	1.31884	2.14582	2.47039	3.25317
	1.68327	0.751669	4.27538	2.64043
	1.16626	1.17986	2.65337	4.32916
	1.37329	1.61695	2.92081	4.18456
	1.10169	1.44666	3.34072	3.88744
	1.39563	1.28348	3.52787	3.83781
	0.889083	1.51124	1.505	3.67616
	0.725981	2.2844	1.79042	3.44182
	1.75141	2.02337	2.34005	1.24046
	0.968512	1.36429	2.65464	2.37951
	1.31945	2.20434	1.91598	4.63951
	1.01175	1.31808	3.51324	1.63935
	0.498157	1.15819	3.22499	3.00098
	1.47544	1.62292	3.12352	2.52333
	1.1983	1.97966	1.22271	3.79601
	1.52319	0.98752	3.25493	2.44782
	1.27715	0.738996	3.2317	4.04404
	2.23816	1.84624	1.08451	0.689637
	0.704512	1.21516	1.46629	4.45584
	0.884878	1.05331	2.10757	3.96358
	0.631016	1.7318	3.65385	1.80195
	1.42911	2.18298	3.6432	1.85845
	0.863072	2.11755	1.9078	3.99805
	0.483483	1.44531	3.98318	3.83813
	2.30242	2.637	4.3111	2.61798
	1.02951	2.44904	2.19572	3.87417
	0.685638	1.68392	3.33238	1.68126
	1.40214	1.8437	2.78227	0.857126
	0.851745	1.4481	2.12845	3.59925
	0.593532	1.85501	1.19892	0.761567
	1.35606	1.66634	3.18135	3.59341
	0.752803	1.53825	1.5515	3.86121
	1.00726	1.97541	0.591336	3.28433
	1.41865	2.62579	2.62738	3.10329
	1.13597	1.48567	2.71532	3.88149
	0.841402	1.3451	3.40748	2.16944
	0.467339	1.33116	1.87482	3.21179
	1.47472	2.17483	2.26706	2.19583
	0.534501	1.04783	4.98146	2.29835
	1.25103	0.903585	2.79722	3.84717
	1.60793	1.67498	4.50108	1.78056
	0.735765	1.69533	4.2704	3.02529
	1.7217	1.42679	3.60353	2.58207
	1.53737	0.917394	3.50449	2.88625
	1.40373	1.93735	2.67025	2.86512
	1.25808	2.38704	2.23707	3.55263
	1.17279	1.36404	3.43702	3.72432
	0.489609	1.13415	1.83904	2.28856
	1.56993	2.59725	4.10451	3.20394
	1.70649	1.99496	2.25937	3.82294
	0.54301	2.46493	2.84404	3.46376
	0.420795	2.14671	2.96679	1.72863
	0.850889	1.43237	3.29948	2.74074
	1.14953	1.291	3.29461	1.93364
	1.36575	2.70768	4.42586	3.8666
	1.30287	1.87583	4.14646	1.46663
	0.872076	1.52073	4.03354	3.76514
	1.49508	0.944113	2.15887	2.71624
	0.805217	2.07682	3.0848	2.34241
	1.78204	1.56765	2.33524	2.1744
	1.31613	0.81298	2.57776	3.10468
	2.40924	1.25701	4.45631	3.62198
	0.96363	0.852243	3.76098	3.1553
	0.756294	1.62059	2.53638	3.43815
	0.722755	0.915986	2.86077	0.867072
	0.847895	1.14891	2.16645	2.75624
	0.60921	1.16876	0.728505	1.67411
	1.70434	1.60342	0.748965	3.5293
	2.95863	2.07551	2.74333	1.42933
	1.42988	2.21326	3.35246	3.44777
	1.08191	1.03432	4.27489	3.15837
	1.32832	1.03237	3.66532	3.87824
	1.06317	2.73886	4.46046	2.87987
	1.24226	1.26546	3.21192	0.706464
	1.56717	2.27826	3.91515	2.70918
	1.15976	2.24379	2.76396	2.16616
	1.30652	1.69232	4.31093	2.16296
	1.05453	1.1315	2.70122	2.931
	1.25435	1.98039	2.04584	2.92707
	0.841874	2.28335	4.21435	1.4865
	1.41797	1.19367	4.19209	2.29201
	0.663299	1.72703	2.42982	1.37889
	1.73117	2.21539	3.4434	2.06531
	0.963402	1.43138	1.4002	1.49119
	1.26489	1.08158	3.98457	2.44615
	0.938731	1.98797	3.96883	2.40531
	0.505269	0.716836	1.35439	3.03571
	1.4731	1.79495	3.38605	4.09661
	1.16681	2.24606	2.61157	2.99776
	1.44123	1.65779	2.82858	2.0993
	1.26986	1.55102	1.7676	3.78812
	2.18319	3.0235	2.55317	3.7056
	0.70229	1.66738	3.08577	3.0207
	0.843386	1.77432	3.12477	2.8539
	0.631165	0.698343	4.29691	3.48941
	1.38699	2.17149	3.04887	1.92617
	3.21044	3.33843	2.8963	3.63632
	0.683726	3.88999	4.49598	2.6268
	1.0263	1.12226	2.39485	4.3298
	1.37891	2.33434	4.49399	1.8263
	0.850466	2.29009	2.7973	2.44825
	0.626847	1.95121	3.02539	0.987973
	1.37086	1.85138	3.16336	2.81878
	0.783793	2.15705	3.85355	0.921848
	0.832608	1.34016	2.02748	3.9628
	0.892675	2.28324	1.92862	4.32764
	0.495363	1.33312	3.75576	2.32959
	0.511848	1.11503	3.35055	4.07506
	0.74932	3.63289	2.99756	3.26657
	0.946643	2.54304	1.15524	3.17578
	1.73666	2.85798	3.39325	3.2282
	2.106	1.93726	3.19334	1.54752
	1.49061	1.31432	1.08344	4.41569
	1.09088	2.63783	1.30896	2.41286
	0.653473	1.38326	3.86645	1.91019
	1.2643	1.13498	2.49341	3.32742
	0.516419	1.41816	3.49758	2.47189
	1.59479	2.0745	3.55767	2.09964
	1.6275	1.64844	1.95075	2.89355
	1.44468	2.59397	4.24851	1.70772
	1.33261	0.791391	4.0579	3.80636
	1.6089	1.4726	2.24301	2.50366
	0.45935	1.63333	3.50241	3.77123
	1.02818	1.74992	2.73797	4.49154
	0.874467	1.45109	2.15107	4.40178
	1.39998	1.8597	2.72299	4.05432
	1.34639	1.16238	1.84025	4.04601
	1.41324	1.60424	1.34918	3.40012
	1.43833	1.12207	3.7348	3.6933
	0.824075	1.16518	1.50196	1.95001
	1.6894	3.02811	0.696829	3.8263
	1.35893	2.55347	2.76018	2.28466
	2.43659	2.51041	2.63127	1.58138
	0.937262	1.34622	3.48882	2.82713
	0.796628	1.29031	1.97937	2.39959
	0.614426	1.40265	4.76425	4.7509
	0.835968	1.51794	2.57661	3.958
	0.631833	1.81117	4.1433	2.65999
	1.76029	1.71898	4.09118	3.99419
	3.03373	1.29387	3.56502	0.635666
	1.32245	2.01298	3.33025	4.41514
	1.04765	1.50642	2.64235	4.46035
	1.2742	2.71995	0.503255	1.0219
	1.05909	0.964556	4.07602	0.603415
	1.23508	1.50586	1.84552	2.55853
	1.10575	2.68065	1.28485	1.92021
	0.806833	1.22221	3.05872	3.97161
	1.00682	2.35157	3.42349	3.73626
	1.53539	2.15052	3.51016	4.16166
	1.15738	1.70257	4.3478	2.86225
	0.892749	2.32027	2.27168	1.55446
	1.43435	2.15568	2.75901	0.841277
	0.679572	0.926117	4.35411	3.83988
	1.82289	2.31483	2.38453	0.832843
	0.946944	2.02839	3.08563	3.63198
	1.24991	1.51446	2.6619	4.17898
	0.980128	2.06308	2.2391	3.37014
	0.456555	1.61249	2.33717	3.41919
	1.60462	1.00171	2.15844	1.17193
	1.13969	1.09344	3.41899	3.27463
	1.50131	1.52543	3.69376	3.78443
	1.42184	2.32199	4.0808	2.29544
	1.20776	0.66174	4.83641	4.04092
	2.36606	1.05096	3.22781	1.77396
	0.713542	1.45394	3.97345	3.18161
	0.841173	2.04736	2.62504	2.64481
	0.630986	0.792432	4.28574	2.74506
	1.32175	1.09423	1.10117	3.62505
	0.663648	1.65447	4.00369	4.01494
	0.912329	1.26544	3.91514	3.03664
	0.507645	1.48717	2.85788	1.78633
	2.34907	1.60609	2.24612	2.27392
	0.659517	2.3407	1.87008	3.26667
	0.932766	1.89524	2.44138	3.8024
	1.36965	1.38145	4.41456	3.46826
	0.910815	2.02432	3.77099	1.59627
	0.660445	1.3028	2.38415	3.10577
	1.37654	1.39838	2.23063	1.98243
	0.80789	1.69235	3.49722	1.54437
	0.993103	0.999156	3.16014	3.96668
	1.39286	1.63937	3.92807	4.07421
	1.08335	0.801013	1.35079	1.92644
	0.864879	1.19432	0.764238	2.31052
	1.4049	1.10233	2.95116	2.76206
	0.519138	1.72988	3.46028	2.15393
	1.17869	2.14491	3.28906	3.326
	1.5395	2.06642	2.53881	2.32083
	0.755064	1.45388	2.75043	3.01982
	1.76721	2.6584	1.62168	3.74487
	2.35271	2.42956	2.53177	3.36062
	0.616873	1.64708	3.28194	3.59595
	0.508307	1.76882	3.14511	0.891532
	1.17036	1.38596	3.049	2.8374
	0.78262	1.93409	4.43171	3.48145
	1.58144	1.56648	2.74762	1.61093
	1.62247	1.19453	2.2175	1.44002
	0.74532	1.11106	4.2442	3.35926
	1.19077	1.43366	2.88333	3.01684
	1.49934	2.46853	3.04914	3.57066
	1.27723	2.05548	3.38012	3.70613
	0.859866	1.29282	3.45795	2.76442
	1.40901	1.35459	2.12808	3.81303
	1.50316	1.22301	1.97776	0.647296
	0.861604	2.10408	1.83095	2.99725
	1.70281	0.99542	3.02665	2.29178
	1.28877	0.889585	3.54078	3.36377
	2.46168	1.76707	3.09609	1.99398
	0.819375	1.44232	1.17507	3.02729
	0.716028	1.83008	3.38633	2.69275
	0.620314	2.2579	3.21198	1.45645
	0.445995	0.861482	1.06444	2.43602
	0.813712	1.14123	1.37888	1.51036
	0.645549	1.83849	3.88913	2.07451
	2.83778	1.68372	2.54545	4.23447
	1.69869	1.54717	3.29385	2.30472
	1.27787	1.16366	3.59077	4.29234
	1.08501	2.4394	1.90022	1.50606
	1.30739	2.16687	4.08912	2.35799
	1.05346	1.86837	4.02542	2.37179
	1.26975	1.16549	2.45257	3.07754
	0.819785	2.67794	3.01555	4.04968
	1.0039	1.39206	2.60011	2.79389
	1.51041	2.37559	2.23045	2.05757
	1.19653	1.45207	2.57679	3.77257
	0.581644	1.27311	1.46608	2.903
	1.68724	1.40453	0.603694	2.54346
	0.745211	2.09967	2.66665	3.38934
	1.73681	1.5072	2.64268	1.94449
	1.03733	0.971689	3.21252	3.81805
	1.20599	1.29463	2.04989	2.64623
	0.938922	1.56091	1.93734	1.77814
	0.485015	1.53895	4.72922	4.71376
	1.46349	1.01681	2.43771	2.31906
	1.06275	1.42379	4.09027	0.997278
	1.54394	1.8796	3.96546	2.92771
	1.07086	2.01023	3.51265	1.18832
	1.51351	1.10381	3.37679	4.00301
	1.3033	0.963573	2.51706	3.99267
	2.33432	2.8019	1.11783	3.11661
	0.820462	1.26436	3.26206	3.27645
	0.754689	1.90555	1.35755	2.9642
	1.36819	2.08226	3.01504	1.48057
	0.699602	1.73849	2.96852	4.05464
	0.892801	1.11322	3.52236	2.46159
	0.498059	2.00774	3.51027	1.90799
	2.31476	2.14532	4.42135	3.20911
	0.69021	1.24002	4.50156	2.01717
	0.91912	1.76154	2.14847	2.70186
	1.36925	2.10964	3.33779	1.67611
	0.962559	1.37013	2.72681	3.47688
	0.682987	1.07171	2.09071	2.7378
	1.47018	1.78395	2.30501	3.66292
	0.741958	1.84549	2.33761	4.42929
	1.41747	2.33226	4.08601	4.03333
	1.08839	1.67193	1.72902	3.73179
	0.898076	1.47935	3.74106	4.2081
	1.39563	2.56211	4.15795	1.90224
	0.52339	1.72882	4.40025	3.85173
	1.23991	1.83119	3.0419	3.53512
	1.57666	1.85573	3.98281	1.15357
	0.778611	0.638058	2.56874	1.63211
	1.57671	0.910409	4.39554	4.52785
	1.61014	1.17411	1.24404	2.39661
	1.06725	1.12209	4.22961	3.12997
	1.36817	3.71089	2.13048	3.68508
	0.561573	1.05993	3.66759	2.3706
	1.14545	2.03303	3.06519	4.00394
	0.503018	2.16703	2.26726	0.607283
	1.57185	1.86822	2.54009	4.53604
	1.67322	1.9278	3.78485	4.42458
	0.715221	2.13036	2.3205	0.983937
	0.56103	1.28831	4.32161	0.614118
	0.426735	2.08548	1.28425	2.39472
	0.815636	1.36492	3.51319	1.69566
	1.08255	1.02569	2.88368	2.12889
	1.60613	3.4638	3.8025	3.97658
	1.25455	2.66809	1.346	3.95645
	0.821254	2.58718	0.925758	2.67995
	1.02851	1.83888	2.82081	4.14745
	1.33067	1.40876	3.49289	1.44964
	1.2113	2.66956	3.36017	0.855778
	1.36561	2.41535	2.69668	3.78973
	1.28562	1.37765	2.74626	0.85156
	2.36854	1.06971	2.62262	3.75947
	0.818028	1.31957	1.66746	3.95864
	1.58772	2.07308	3.11326	2.13352
[truncated: 32,974 more rows]

## Sheet: Figure 6 Supp 2 Panel B
		Displacement															Number of families	1
		Calcium	Displacement			Displacement by calcium bins											Number of comparisons per family	36								Percentage of cells that move far
		1.34278	0.09			0.3-0.5	0.5-1.0	1.0-1.5	1.5-2.0	2.0-2.5	2.5-3.0	3.0-3.5	3.5-4.0	4.0-4.5			Alpha	0.05								WT cells
		1.83068	0.08			11.34	0.12	0.09	0.08	0.13	19.82	0.12	0.16	0												Calcium Ratio	0.3-0.5	0.5-1.0	1.0-1.5	1.5-2.0	2.0-2.5	2.5-3.0	3.0-3.5	3.5-4.0	4.0-4.5
		1.88755	0.75			3.62	1.77	0.33	0.75	0.01	0.06	0	0.23	0.01			Tukey's multiple comparisons test	Mean Diff.	95.00% CI of diff.	Below threshold?	Summary	Adjusted P Value				Mean Speed	0	9.62828	4.7619	1.66178	2.26586	2.05128	0	0	0
		3.29248	0.12			3.17	1.77	0.1	0.02	0.01	0.04	0.85	0.09	0.03			0.3-0.5 vs. 0.5-1.0	-35.05	-98.92 to 28.82	No	ns	0.745	A-B
		3.34694	0			3.16	3.17	0.29	0.08	0.08	0	0.04	0	0.11			0.3-0.5 vs. 1.0-1.5	-14.62	-78.47 to 49.23	No	ns	0.9987	A-C
		3.28976	0.85			3.32	2.27	0	0.02	0.1	0.05	0.06	0	0.11			0.3-0.5 vs. 1.5-2.0	-2.136	-66.15 to 61.87	No	ns	>0.9999	A-D
		2.95113	19.82			19.53	2.61	0.09	0.15	0.88	0.03	0.07	0.02	0.06			0.3-0.5 vs. 2.0-2.5	-4.44	-68.65 to 59.77	No	ns	>0.9999	A-E
		1.49841	0.33			0	3.35	0.02	0.02	0.04	0.02	0.03	9.04	0.19			0.3-0.5 vs. 2.5-3.0	-4.004	-68.61 to 60.61	No	ns	>0.9999	A-F
		1.58492	0.02			2.76	1.1	0.08	0.1	0.03	0.03	11.02	0.15	0.18			0.3-0.5 vs. 3.0-3.5	3.046	-63.07 to 69.16	No	ns	>0.9999	A-G
		1.80417	0.08			0.12	5.46	0.04	0.45	0.03	0.19	0.03	0	0.81			0.3-0.5 vs. 3.5-4.0	4.266	-65.26 to 73.79	No	ns	>0.9999	A-H
		1.64357	0.02			0.68	6.25	0.01	0.03	0.01	0.21	0.07	0.04	0.77			0.3-0.5 vs. 4.0-4.5	4.249	-81.13 to 89.63	No	ns	>0.9999	A-I
		1.57854	0.15			4.65	0.24	0.54	0.3	0.01	0.05	0.01	0.12	1.09			0.5-1.0 vs. 1.0-1.5	20.43	12.92 to 27.95	Yes	****	<0.0001	B-C
		1.40769	0.1			3.33	0.61	0.02	0.4	0.38	0.05	0.36	0.49	1.35			0.5-1.0 vs. 1.5-2.0	32.92	24.13 to 41.70	Yes	****	<0.0001	B-D
		1.70758	0.02				5.77	0.29	0.3	0.02	0.01	0.06	0.1	0.3			0.5-1.0 vs. 2.0-2.5	30.61	20.46 to 40.76	Yes	****	<0.0001	B-E
		3.65028	0.16				0.12	0.05	0.04	0	1.1	0.06	0.03	0.35			0.5-1.0 vs. 2.5-3.0	31.05	18.63 to 43.47	Yes	****	<0.0001	B-F
		2.81357	0.06				0.69	0.37	0.1	0.01	0.02	0.13	0.06	0.51			0.5-1.0 vs. 3.0-3.5	38.1	19.35 to 56.85	Yes	****	<0.0001	B-G
		2.79244	0.04				8.36	0.07	0.83	0.12	0.02	0.02	0.16				0.5-1.0 vs. 3.5-4.0	39.32	10.80 to 67.84	Yes	***	0.0006	B-H
		1.88745	0.1				0.1	0.03	0.03	0.02	0.61	0.04	0.01				0.5-1.0 vs. 4.0-4.5	39.3	-17.88 to 96.48	No	ns	0.4508	B-I
		3.11821	0.04				0.37	0.22	0.17	0.02	23.31	0.03	0.04				1.0-1.5 vs. 1.5-2.0	12.48	3.856 to 21.11	Yes	***	0.0002	C-D
		2.65166	0				0.7	0.35	0.02	0.03	0.04	0.26	0.17				1.0-1.5 vs. 2.0-2.5	10.18	0.1618 to 20.19	Yes	*	0.043	C-E
		1.42642	0.29				10.72	0.4	0.01	0.03	0.07	0.3	0.11				1.0-1.5 vs. 2.5-3.0	10.61	-1.695 to 22.92	No	ns	0.1567	C-F
		3.39635	0.06				5.9	0.15	0.02	0.96	0.11	0.02	0.41				1.0-1.5 vs. 3.0-3.5	17.66	-1.011 to 36.34	No	ns	0.0808	C-G
		2.52398	0.05				0.28	0.05	0.01	0.04	0.03	2.4	0.24				1.0-1.5 vs. 3.5-4.0	18.88	-9.589 to 47.36	No	ns	0.5026	C-H
		2.9147	0.03				0.71	0.16	0.11	4.11	0.09	0.04	0.07				1.0-1.5 vs. 4.0-4.5	18.87	-38.29 to 76.02	No	ns	0.9836	C-I
		2.83446	0.02				0.91	0.5	0.03	0	0.16	0.14	0.04				1.5-2.0 vs. 2.0-2.5	-2.304	-13.30 to 8.692	No	ns	0.9993	D-E
		2.73213	0.03				12.64	0.17	0.32	0.14	0.03	0.02	0.24				1.5-2.0 vs. 2.5-3.0	-1.867	-14.99 to 11.25	No	ns	>0.9999	D-F
		1.89852	0.45				8.04	0.39	0.11	0.01	0.01	0.02	0.09				1.5-2.0 vs. 3.0-3.5	5.182	-14.04 to 24.40	No	ns	0.9958	D-G
		1.30415	0				0.39	0.62	0.08	0.01	70.35	0	0.04				1.5-2.0 vs. 3.5-4.0	6.402	-22.43 to 35.24	No	ns	0.9989	D-H
		2.65355	0.19				0.47	0.17	0.06	0.17	0.2	0	0.72				1.5-2.0 vs. 4.0-4.5	6.385	-50.95 to 63.72	No	ns	>0.9999	D-I
		3.82024	0.23				0.72	16.41	0.11	0.07	0.21	12.01	0.07				2.0-2.5 vs. 2.5-3.0	0.437	-13.64 to 14.51	No	ns	>0.9999	E-F
		3.03162	0.07				17.78	0.23	0.03	0.5	0.01	0.12	0.05				2.0-2.5 vs. 3.0-3.5	7.486	-12.39 to 27.37	No	ns	0.963	E-G
		2.52359	0.21				9.9	0.46	0.22	0.78	0.21	0.06	0.25				2.0-2.5 vs. 3.5-4.0	8.707	-20.57 to 37.99	No	ns	0.9917	E-H
		3.46374	0.03				0.24	0.07	0.12	0.03	0.19	0.1	0.04				2.0-2.5 vs. 4.0-4.5	8.689	-48.87 to 66.25	No	ns	>0.9999	E-I
		1.87222	0.03				0.25	0.2	0.23	0.1	0	1.34	0.57				2.5-3.0 vs. 3.0-3.5	7.049	-14.08 to 28.18	No	ns	0.9825	F-G
		1.59381	0.3				0.93	0.02	0.79	0.26	0.16	0.1	0.01				2.5-3.0 vs. 3.5-4.0	8.27	-21.87 to 38.41	No	ns	0.9952	F-H
		3.63035	0.09				15.29	0.06	0.12	0.02	0.2	0.35	0.02				2.5-3.0 vs. 4.0-4.5	8.252	-49.75 to 66.26	No	ns	>0.9999	F-I
		2.67441	0.05				1.7	0.04	0.03	80.96	0.47	0.05	0.01				3.0-3.5 vs. 3.5-4.0	1.221	-32.03 to 34.47	No	ns	>0.9999	G-H
		2.43344	0.13				0.66	0.76	2.11	0.02	2.1	0	0.06				3.0-3.5 vs. 4.0-4.5	1.203	-58.48 to 60.88	No	ns	>0.9999	G-I
		1.97576	0.4				1.23	0.91	0.69	0.01	0.02	1.91	1.01				3.5-4.0 vs. 4.0-4.5	-0.01762	-63.45 to 63.42	No	ns	>0.9999	H-I
		1.85153	0.3				10.81	0.11	0.18	0.02	0.04	0.05	0.18
		2.47055	0.01				0.1	0.35	0.03	0.98	3.68	0.24	0.87				Test details	Mean 1	Mean 2	Mean Diff.	SE of diff.	n1	n2	q
		2.63189	0.05				0.3	0.19	0.08	0.04	0.03	0.18	0.04				0.3-0.5 vs. 0.5-1.0	4.64	39.69	-35.05	20.58	12	1641	2.408
		4.01234	0				0.64	0.21	0.12	0.05	0.09	0.19	0.03				0.3-0.5 vs. 1.0-1.5	4.64	19.26	-14.62	20.58	12	1806	1.005
		2.25728	0.01				22.68	0.41	0.69	0.24	172.85	0.35	0.52				0.3-0.5 vs. 1.5-2.0	4.64	6.776	-2.136	20.63	12	1023	0.1464
		2.53861	0.01				1.05	0.08	0.54	0.28	22.55	6.89	0.01				0.3-0.5 vs. 2.0-2.5	4.64	9.08	-4.44	20.69	12	662	0.3035
		2.03945	0.08				0.88	1.33	0.33	0.06	0.48	0.1	0.01				0.3-0.5 vs. 2.5-3.0	4.64	8.644	-4.004	20.82	12	390	0.2719
		1.63498	0.04				14.58	0.74	0.47	0.04	0.03	0.16	0.01				0.3-0.5 vs. 3.0-3.5	4.64	1.594	3.046	21.31	12	151	0.2021
		1.69821	0.1				0.09	0.89	0.96	0.7	0.09	0.02	0.41				0.3-0.5 vs. 3.5-4.0	4.64	0.3737	4.266	22.41	12	62	0.2693
		1.8179	0.83				0.08	0.06	0.28	0.13	0.21	11.2	0.05				0.3-0.5 vs. 4.0-4.5	4.64	0.3913	4.249	27.52	12	15	0.2184
		2.63029	1.1				0.35	22.82	0.16	0.13	0	0.68	0.59				0.5-1.0 vs. 1.0-1.5	39.69	19.26	20.43	2.423	1641	1806	11.93
		3.54133	0				0.96	1	0.06	0.14	0.04	0.22	0.08				0.5-1.0 vs. 1.5-2.0	39.69	6.776	32.92	2.83	1641	1023	16.45
		2.84154	0.02				36.68	0.66	0.36	0.17	0.07	1.02	0.61				0.5-1.0 vs. 2.0-2.5	39.69	9.08	30.61	3.271	1641	662	13.23
		2.76187	0.02				0.78	0.35	0.43	0.06	0.04	0.02	0.19				0.5-1.0 vs. 2.5-3.0	39.69	8.644	31.05	4.002	1641	390	10.97
		2.24988	0.1				14.04	0.54	0.25	0.04	0.04	0	0.54				0.5-1.0 vs. 3.0-3.5	39.69	1.594	38.1	6.042	1641	151	8.918
		2.50841	0.61				1.02	0.29	0.74	0.97	0.43	0.01	0.08				0.5-1.0 vs. 3.5-4.0	39.69	0.3737	39.32	9.192	1641	62	6.049
		2.55073	23.31				0.92	0.66	0.75	0.22	0.12	0.05	0.14				0.5-1.0 vs. 4.0-4.5	39.69	0.3913	39.3	18.43	1641	15	3.016
		1.78389	0.03				0.02	0.24	0.03	0.54	0	0.34	0.34				1.0-1.5 vs. 1.5-2.0	19.26	6.776	12.48	2.78	1806	1023	6.35
		2.27395	0.88				0.34	0.39	0.38	3.18	0.06	0.16	0.32				1.0-1.5 vs. 2.0-2.5	19.26	9.08	10.18	3.228	1806	662	4.459
		2.51193	0.04				6.32	0	1.26	0.17	0.21	8.85	0.4				1.0-1.5 vs. 2.5-3.0	19.26	8.644	10.61	3.967	1806	390	3.784
		2.0697	0.04				0.4	0.18	0.36	1.06	0.91	0.06	0.51				1.0-1.5 vs. 3.0-3.5	19.26	1.594	17.66	6.019	1806	151	4.151
		1.30585	0.09				0.75	1.99	0.04	0.12	2.21	0.54	0.69				1.0-1.5 vs. 3.5-4.0	19.26	0.3737	18.88	9.176	1806	62	2.91
		2.71996	0.07				37.87	0.79	0.28	0.15	0	0.11	0.95				1.0-1.5 vs. 4.0-4.5	19.26	0.3913	18.87	18.42	1806	15	1.449
		3.21944	11.02				0.48	0.22	0.11	0.04	0.11	0.2	0.64				1.5-2.0 vs. 2.0-2.5	6.776	9.08	-2.304	3.544	1023	662	0.9196
		2.88915	0.11				1.19	0.89	0.18	0.41	30.21	0.6					1.5-2.0 vs. 2.5-3.0	6.776	8.644	-1.867	4.228	1023	390	0.6246
		2.14005	0.03				0.7	0.11	0.3	0.04	0.27	10.83					1.5-2.0 vs. 3.0-3.5	6.776	1.594	5.182	6.194	1023	151	1.183
		2.40972	0.03				18.11	6.09	0.64	0.3	0.09	0.1					1.5-2.0 vs. 3.5-4.0	6.776	0.3737	6.402	9.292	1023	62	0.9744
		3.53621	0				0.24	0.91	0.14	0.21	0.34	0.89					1.5-2.0 vs. 4.0-4.5	6.776	0.3913	6.385	18.48	1023	15	0.4886
		2.13342	0.01				2.86	0.47	0.44	0.03	0.24	0.15					2.0-2.5 vs. 2.5-3.0	9.08	8.644	0.437	4.535	662	390	0.1363
		1.48546	0.02				0.51	0.39	0.41	1.22	0.22	0.51					2.0-2.5 vs. 3.0-3.5	9.08	1.594	7.486	6.407	662	151	1.652
		1.74178	0.17				0.53	0.64	0.16	0.03	0.03	0.75					2.0-2.5 vs. 3.5-4.0	9.08	0.3737	8.707	9.436	662	62	1.305
		4.15711	0.01				0.73	0.4	0.39	0.15	0.34	0.12					2.0-2.5 vs. 4.0-4.5	9.08	0.3913	8.689	18.55	662	15	0.6624
		3.13223	0.03				47.12	0.08	0.28	0.04	0.06	13.11					2.5-3.0 vs. 3.0-3.5	8.644	1.594	7.049	6.81	390	151	1.464
		1.76272	0.02				0.34	0.77	0.59	0.08	0.08	0.03					2.5-3.0 vs. 3.5-4.0	8.644	0.3737	8.27	9.714	390	62	1.204
		2.51446	0.03				1.82	0.17	1.12	0.08	0.1	0.56					2.5-3.0 vs. 4.0-4.5	8.644	0.3913	8.252	18.69	390	15	0.6243
		1.25656	0.08				0.69	0.09	0.29	0.03	0.1	0.14					3.0-3.5 vs. 3.5-4.0	1.594	0.3737	1.221	10.72	151	62	0.1611
		3.07623	0.07				15.21	0.21	1.14	0.09	0.05	0.6					3.0-3.5 vs. 4.0-4.5	1.594	0.3913	1.203	19.23	151	15	0.08845
		3.03777	0.01				0.02	0.37	0.07	1.22	0.03	0.19					3.5-4.0 vs. 4.0-4.5	0.3737	0.3913	-0.01762	20.44	62	15	0.001219
		2.10899	0.01				0.08	0.01	0.13	0.17	0.1	17.19
		0.998216	0.12				0.3	0.18	0.18	0.01	0.24	0.6
		1.99787	0.01				3.49	2.84	0.05	1.77	0.16	0.77
		2.07048	0.38				0.97	0.75	1.08	0.05	0.03	0.02
		1.48713	0.04				55.82	1.2	0.32	0.81	1.19	0.13
		2.51452	0.09				0.69	0.03	0.21	0.08	5.25	0.1
		2.06613	0.02				17.31	12.02	0.06	0.75	0.16	16.43
		2.1385	0				1.6	0.55	0.57	0.25	0.03	0.58
		3.14798	0.36				0.81	0.38	0.27	0.13	27.75	0.39
		2.41619	0.01				0.32	0.17	0.21	2.19	0.03	0.51
		1.95204	0.02				2.65	1.08	0.26	0.09	0.08	0.42
		1.35979	0.01				0.41	1.11	0.2	0.18	0.07	0.13
		2.0096	0.12				0.46	0.13	0.19	0.08	0.54	17.33
		3.62393	0.02				0.53	0.77	2.84	0.19	0.23	0.15
		1.61644	0.01				72.71	0.14	0.33	0.05	0.11	0.81
		1.38361	0.54				0.4	0.66	0.64	0.1	0.02	0.59
		1.75502	0.11				1.14	0.14	0.55	0.21	0.02	1.01
		1.53051	0.03				0.62	1.72	0.04	0	0.1	0.43
		1.59428	0.32				19.24	0.02	0.61	1.35	0.27	0.23
		3.13148	0.06				0.43	0.21	0	0.34	0.03	0.23
		2.47033	0.02				0.06	2.21	0.74	0.25	72.77	15.41
		1.39136	0.02				0.65	0.26	0.23	0.16	0.41	1.1
		3.42095	0.06				4.56	0.05	0.16	0.63	0.15	0.66
		2.90676	0.16				0.33	1.5	0.29	0.21	0.21	0.69
		1.37874	0.29				80.71	2.02	3.78	2.71	1.29	0.46
		1.7406	0.11				0.48	0.73	0.2	0.9	11.53	0.36
		1.94219	0.08				20.45	0.5	0.12	0.04	0.14	1.69
		3.31541	0.13				1.82	37.79	0.13	0.16	0.19	0.86
		3.50791	9.04				2.79	1.57	0.34	0.16	37.48	0.59
		2.80905	0.03				0.57	0.37	0.33	0.63	0.05	0.33
		2.84013	0.01				0.72	0.31	1.1	0.22	0.17	0.52
		2.56437	70.35				0.35	0.87	0.76	0.02	0.13	17.87
		1.28148	0.05				0.68	0.76	0.02	0.05	0.48	1.7
		2.6376	0.2				1.12	0.65	0.32	0.02	0	0.82
		1.34785	0.37				0.5	0.05	0.63	0.19	0.07	0.78
		1.63955	0.06				3.07	0.06	0.98	81.29	0.05	0.85
		3.58764	0.15				0.52	1.74	0.01	1.58	1.17	0.18
		2.71835	0.21				169.32	0.3	0.36	0.07	0.31	1.67
		2.70349	0.01				0.44	0.4	0.56	0.41	0.12	0.73
		1.93347	0.11				20.26	0	1.08	0.04	0.9	0.63
		3.69618	0				0.97	0.15	0.6	0.06	0.05	0.02
		2.6102	0.21				2.66	0.44	0.02	0.2	0.45	1.98
		2.90431	0.19				3.03	0.46	0.54	0.16	0.24	0.83
		2.54073	0				0.86	0.98	56.75	40.24	0.07	1.17
		2.25071	0.02				0.62	0.22	4.55	1.87	63.91	1.67
		3.69478	0.04				0.86	3.33	0.19	0.21	0.43	0.78
		2.64382	0.16				1.94	0.1	0.12	0.03	1	0.58
		2.14943	0.03				1.02	0.79	0.06	0.17	15.18	26.92
		1.72677	0.03				1.58	1.24	0.22	0.11	0.13	0.83
		3.71216	0.12				0.75	0.17	0.37	0.39	0.14	0.44
		2.89155	0.2				185.25	41.62	0.23	0.39	38.2	0.65
		2.56577	0.47				0.52	1.24	0.35	0.01	0.15	1.05
		3.34657	0.02				19.32	0.24	0.03	0.1	0.17	0.44
		1.77398	0.22				1.2	0.33	0.16	0	17.11	0.05
		1.70939	0.12				39.19	0.75	0.17	0.01	0.16	0
		2.65394	2.1				1.31	3.59	0.98	0.13	1.01	0.03
		3.48536	0.04				2.37	0.75	0.25	0.16	0.43	0.1
		2.72415	0.02				1.47	0.64	0.77	0.04	0.11	0.01
		2.77972	0.04				2.14	0.53	0.72	1.24	0.43	0.01
		2.26835	0.03				0.71	0.39	0.29	0.11	0.18	0.03
		2.35954	0.96				4.9	1.93	1.7	0.07	0.14	0.05
		1.87108	0.23				0.37	0.14	9.76	0.16	0.08	0.72
		1.78458	0.79				1.71	0.3	0.21	3.34	0.24	0.03
		2.45518	0.04				0.77	0.43	0.72	41.16	0.58	0.05
		2.56725	3.68				1.06	0.3	3.12	0.29	22.32	0.1
		1.78279	0.12				1.9	1.1	50.62	0.01	0.17	0.67
		2.27367	4.11				0.54	0.24	0.52	0.26	0.14	0.12
		2.51685	0.03				170.39	3.39	0.18	3.54	0.26	0.34
		2.06825	0				0.25	0.13	0.55	0.47	18.67	0.12
		1.36446	0.07				22.01	1.7	0.35	0.11	0.24	0.29
		2.81159	0.09				1.04	0.61	0.06	0.07	0.12	0.43
		2.85295	172.85				36.2	51.74	0.21	0.39	0.3	0.27
		1.55499	0.03				2.13	0.16	0.17	0.07	0.48	0.45
		1.90744	2.11				3.02	1.46	0	0.04	0.14	0.39
		2.18431	0.14				3.9	0.8	0.06	0.25	0.3	0.71
		2.37562	0.01				1.09	0.49	0.29	0.02	0.06
		3.25894	0.03				3.62	0.79	0.28	58.02	68.87
		2.05797	0.01				2.23	4.56	0.28	1.26	1.33
		1.47143	0.03				2.8	0.33	1.05	0.12	0.47
		1.73204	0.69				2.34	0.64	0.93	0.02	0.46
		4.2807	0.03				2.57	1.17	1.57	0.01	0.52
		2.68786	22.55				0.03	1.81	0.1	0.46	44.8
		1.72051	0.18				0.14	0.17	0.08	0.14	0.16
		2.36771	0.17				1.05	1.39	0.42	191.89	0.13
		1.25844	0.22				3.72	0.26	0.95	52.85	193.16
		2.82184	0.48				0.54	0.32	13.64	0.1	1.28
		3.0386	0.26				65.1	0.38	0.11	2.1	0.06
		2.08427	0.07				0.21	0.6	0.09	0.04	0.29
		0.993886	1.77				16.78	3.7	4.56	0.07	0.16
		2.07003	0.5				0.93	0.36	0.47	0.48	0.03
		2.10785	0.78				133.81	0.38	0.85	0	20.36
		1.56269	0.03				4.15	4.43	0.18	0.43	1.23
		2.77177	0.03				1.91	0.85	0.08	0.43	0.14
		2.57345	0.09				2.91	0.48	0.12	0.14	0.24
		2.00849	0.03				1.88	2.63	0.01	0.04	0.59
		2.24107	0.1				0.59	0.31	0.55	0.13	0.29
		3.11717	0.3				3.22	45.29	0.25	0.25	0.35
		2.51573	0.21				0.91	1.04	1.09	0.19	0.06
		1.86243	0.08				2.72	0.66	0.24	0.05	0.17
		1.44207	0.35				0.07	0.7	8.95	80.23	0.22
		2.06598	0.26				0.28	0.74	0.36	1.47	0.12
		3.28852	0.02				0.95	5.63	0.18	0.3	5.31
		3.4322	2.4				1.53	0.68	3.86	0.22	0.42
		3.47191	0.04				0.86	1.28	47.36	0.14	17.3
		1.61081	0.12				129.69	1.21	0.41	0.92	0.87
		1.50799	0.69				0.18	0.34	0.22	0.38	0.04
		1.89748	0.54				14.73	3.09	0.31	1.35	0.14
		1.51064	0.33				0.76	1.35	0.9	0.01	0.16
		1.50042	0.47				145.4	0.48	0.15	0.29	25.83
		2.89287	0				3.19	24.28	0.18	0.58	0.07
		1.84337	0.96				2.62	0.98	0.26	2.42	0.32
		3.18135	0.14				1.72	0.47	0.55	0.42	0.45
		2.4445	0.02				4.99	0.14	0.55	0.02	0.01
		3.19994	0.02				1.1	0.82	0.72	0.22	73.37
		1.34581	0.4				2.57	8.28	1.33	184.16	6.86
		2.79164	0.04				2.17	0.35	0.46	0.11	21.12
		1.27132	0.15				2.68	0.29	0.3	0.17	1.37
		1.57438	0.28				2.66	5.2	0.75	0.1	0.15
		1.83014	0.16				2.46	1.01	0.18	0.29	0.29
		3.22972	0.02				36.01	0.97	0.43	0.49	0.19
		2.99141	0.07				0	1.65	9.81	0.1	19.98
		2.8965	0.04				0.05	0.38	0.26	0.04	0.38
		2.31892	80.96				1.27	0.71	4.74	0	1.36
		2.74933	0.04				1.16	42.61	0.41	0.42	0.26
		1.21955	0.05				0.68	2.63	0.3	0.22	0.81
		1.36707	0.16				210.49	0.59	0.34	65.31	0.24
		1.69242	0.06				0.61	0.84	0.5	0.1	0
		3.71804	0.49				1.02	0.88	0.18	1.76	82.88
		2.77286	0.43				145.18	0.96	0.04	0.33	18.21
		1.64347	0.36				39.85	1.05	1	0.22	0.38
		1.87761	0.43				3.76	0.87	0.46	0.06	0.16
		3.62807	0.1				2.91	1.89	2.3	0.69	0.04
		2.63439	0.12				1.42	0.46	0.47	0.38	0.75
		2.48272	0.02				12.25	3.31	1.35	1.45	10.53
		2.9067	0				3.77	0.78	1.24	0.1	22.89
		2.15359	0.01				1.86	9.58	0.11	0.15	0.78
		3.79934	0.03				5.87	2.5	12.09	0.2	0.07
		2.6509	0.06				2.8	0.33	0.84	60.71	0.04
		2.11712	0.02				1.37	0.19	0.78	2.5	0.55
		1.6434	0.25				5.3	0.65	0.09	0.62	0.01
		3.56689	0.06				3.82	0.57	1.09	0.03	91.03
		2.75757	0.21				40.65	0.76	0.17	0.38	13.04
		2.53509	0.91				0.12	0.35	0.09	191.37	0.42
		3.44223	0				44.69	5.14	0.24	0.66	21.4
		2.83891	2.21				1.23	0.54	0.05	0.05	0.29
		3.42481	0				1.84	1.31	1.57	0.13	1.18
		2.56605	0				1.36	0.1	0.59	1.32	1.2
		2.73953	0.11				120.15	32.2	1.16	0.1	0.71
		2.22047	0.98				0.3	3.32	0.71	0.14	0.18
		2.16405	0.04				13.97	0.71	0.72	0.32	22
		1.87761	0.74				0.49	0.55	0.01	0.14	0.35
		2.42628	0.05				177.36	0.98	0.4	0.39	1.34
		1.7805	0.75				37.87	0.7	0.21	0.61	0.69
		2.61686	30.21				3.33	0.21	0.45	60.28	0.09
		2.45961	0.24				2.7	1.16	0.4	0.38	0.2
		1.67758	0.03				1.41	1.18	0.16	1.92	100.27
		2.23141	0.28				5.62	0.31	0.24	0.69	0.38
		2.31641	0.06				1.37	1.06	0.01	0.04	13.44
		2.04857	0.04				3.01	0.6	0.22	0.02	0.79
		1.35194	0.5				3.09	3.26	0.09	1.02	18.37
		2.63475	0.27				3.48	52.35	1	0.72	1.32
		3.21385	12.01				0.84	1.76	0.53	1.46	0.39
		1.66439	0.38				0.11	2.82	0.09	0.01	0.35
		1.73945	1.26				2.24	0.33	0.8	0.29	14.63
		2.2363	0.7				2.73	0.07	0.55	1.98	1.04
		2.40116	0.13				0.03	0.92	1.87	0.17	0.04
		3.59367	0.16				0.63	10.96	0.24	0	20.45
		2.08382	0.13				1.65	0.57	47.34	0.18	0.9
		1.40155	0.17				1.79	4.15	1.7	191.5	0.79
		1.59875	0.36				1.63	1.76	0.4	0.44	0.28
		4.23187	0.11				74.04	0.44	0.18	0.12	1.24
		1.66232	0.04				0.97	0.27	0	0.69	109.16
		2.51817	0.09				84.14	0.32	0.57	0.24	0.28
		1.19204	0.39				10.56	1.41	0.13	0.17	15.63
		2.50595	0.34				0.81	1.01	0.17	0.73	0.16
		2.9126	0.24				2.76	51.57	0.25	1.33	0.8
		2.14463	0.14				185.84	38	1.77	0.76	0.17
		0.949423	1.77				43.48	0.81	1.19	0.02	0.42
		1.995	0.28				2.9	2.72	0.35	1.13	20.56
		2.11011	0.17				2.79	1.11	0.38	72.2	1.62
		1.53986	0.11				1.67	0.49	1.5	1.26	0.11
		2.76702	0.22				5.2	0.09	0.68	1.39	0.63
		2.52367	0.03				1.04	1.51	0.27	0.09	122.46
		1.93208	0.18				4.3	1.41	0.07	0.25	0.38
		2.14902	0.06				3.79	2.14	0.64	0.23	0.64
		3.09007	0.12				4.43	0.13	1.19	2.65	0.67
		2.47134	0.04				2.05	4.85	0.39	0.11	0.07
		2.04263	0.97				3.72	1.52	0.14	180.87	0.85
		1.37048	0.62				1.83	51.65	1.98	0.19	0.02
		2.03143	0.22				0.07	1.34	1.51	1.97	17.23
		3.16349	0.06				0.1	0.36	0.14	0.44	25.2
		1.30514	0.17				0.86	0.13	0.08	0.04	0.14
		1.57874	0.3				1.28	0.07	0.13	0.32	0.49
		1.84863	0.64				5.16	0.99	0.91	0.16	0.18
		3.361	0.1				1.55	11.3	1	0.92	1.77
		3.29779	1.34				69.77	3.82	0.34	0.15	137.46
		3.40625	0.1				0.96	1.75	0.45	0.11	0.42
		1.59414	0.14				92.07	0.45	41.34	0.37	21.4
		1.28555	16.41				9.37	0.13	0.46	0.15	0.48
		1.88109	0.44				0.64	0.15	0.25	0.57	1.93
		1.49438	0.23				207.88	0.53	0.1	1.34	1.09
		1.59972	0.41				35.93	28.2	1.64	0.24	0.05
		1.5606	0.16				3.24	2.64	0.01	62.44	19.19
		3.36936	0.35				2.26	0.71	0.06	1.64	2.14
		2.81557	0.34				7	1.64	0.31	0.13	2.14
		2.72428	0.06				0.83	0.35	0.04	0.6	144.75
		2.00908	0.54				4.08	0.29	1.72	0.9	0.28
		2.92898	0.08				2.96	1.23	0.08	1.15	20.42
		2.53082	0.1				3.04	1.35	0.56	0.12	19.5
		1.39343	0.46				3.25	1.28	0.36	0.06	0.24
		3.11094	0.05				1.31	0.35	0.33	1.37	1.47
		2.7758	0.1				3.3	2.3	0.31	0.8	0.73
		2.8289	0.05				2.1	1.51	0.91	0.17	0.18
		2.80699	0.03				0.05	61.73	1.26	0.17	22.19
		2.0541	3.18				0.05	1.15	4.19	187.74	23.42
		2.77025	0.1				0.56	3.96	1.11	0.28	2.38
		1.19498	0.07				0.67	0.39	1.15	4.52	1.72
		2.48305	0.17				1.76	0.06	0.52	0.07	82.06
		1.3752	0.2				3.99	0.91	2.05	0.27	146.41
		2.67524	0.24				1.77	1.18	1.91	0.97	0.44
		2.4347	1.06				138.35	12.99	0.1	0.07	20.02
		3.44798	0				0.81	0.82	0.26	0.06	22.04
		1.83738	0.39				100.57	3.93	0.11	0.21	0.82
		1.48209	0.02				1.04	2.07	0.08	0.31	2.31
		3.86843	0.01				1.31	0.87	3.03	0.01	20.7
		2.56395	0.16				182.77	0.49	0.33	1.19	22.15
		1.92344	0.28				44.83	0.31	0.73	0.28	0.12
		1.79808	0.59				3.32	1.31	0.4	61.92	2.91
		2.39465	0.12				5.91	0.88	0.12	0.33	0.84
		2.40803	0.15				0.93	32.76	0.25	2.2	2.61
		2.9309	0.03				9.31	24.93	1.01	1.2	1.07
		1.93148	1.12				4.36	0.55	5.36	0.62	0.49
		3.8049	0.04				2	3.18	1.18	0.5	21.25
		2.6129	1.19				2.69	0.85	0.82	3.46	0.83
		2.15046	0.04				6.44	0.44	0.46	1.26	1.71
		1.78221	0.29				0.91	1.76	0.49	0.04	23.9
		3.53921	0.17				2.57	1.49	0.04	0.12	0.11
		1.76128	1.14				68.26	2.09	0.13	1.08	21.89
		2.80669	5.25				2.49	0.25	2.12	0.27	3.4
		3.54714	0.11				0.08	0.1	1.33	0.22	0.73
		2.52257	0.16				0.01	1.22	0.04	186.85	2.9
		2.77623	0.03				1.73	64.38	0.33	0.64	0.52
		2.22473	0.41				4.45	1.37	0.18	4.29	19.39
		2.22752	0.04				2.29	3.67	0.1	2.09	20
		2.42325	0.3				76.84	0.66	5.89	0.31	0.98
		2.66631	27.75				0.28	0.08	0.27	0.16	3.9
		1.60486	0.07				1.14	0.97	1.96	0.73	19.82
		2.29326	0.21				101.59	14.83	0.5	0.29	23.32
		2.44692	0.03				8.08	0.71	0.46	1.3	4.28
		1.86844	0.13				1.05	4.05	1.73	0.56	0.71
		1.25647	0.06				210.34	0.65	0.65	1.31	0.4
		2.59285	0.03				29.48	0.76	0.65	57.45	2.8
		3.06922	1.91				3.19	25.62	0.62	2.43	16.78
		1.50848	0.18				2.12	0.5	1	0.5	1.64
		1.52978	0.05				2.52	0.1	0.46	0.59	1.48
		2.636	0.08				6.05	0.86	5.35	0.02	20.58
		2.20187	1.22				0.5	34.16	1.57	0.07	19
		2.38237	0.03				4.81	2.62	1.32	0.23	4.81
		3.69443	0.41				11.93	0.49	0.7	0.31	0.5
		2.054	0.15				1.31	2.57	0.28	175.14	73.19
		1.33206	0.04				2.19	1.87	0.11	0.6	2.81
		1.54746	1.08				64.6	2.57	0.1	0.05	22.16
		4.17747	0.11				2.18	2.53	4.24	0.03	20.2
		1.6934	0.32				0.04	1.05	0.02	0.64	26.82
		3.26004	0.05				0.07	53.77	0.69	1.71	17.32
		2.32213	0.04				2.65	2.3	0.12	0.17	3.63
		1.15266	0.76				2.35	1.37	5.95	0.24	2.86
		2.6432	0.07				0.53	0.84	0.15	1.04	0.45
		3.02392	0.24				1.5	1.2	47.14	1.14	21.76
		2.09504	0.08				1.56	18.98	2.51	1.68	21.7
		0.923016	3.17				2.14	5.34	0.76	63.4	0.4
		1.91275	0.21				3.44	0.7	0.97	0.18	0.66
		1.95607	0.06				86.4	0.12	0.7	1.92	25.46
		2.46383	0.08				0.88	0.33	0.36	0.76	20.48
		1.85331	0.57				127.85	2.77	1.82	0.69	21.35
		2.00817	0.03				260.73	0.34	6.98	0.1	0.22
		3.082	0.18				1.57	0.85	1.1	0.42	0.2
		2.37492	0.09				44.71	0.23	0.57	0	0.01
		1.99258	0.27				4.98	0.12	1.77	0.15	0.56
		1.35295	0.91				1.8	24.95	0.4	0.9	25.86
		1.97355	0.21				0.34	0.44	0.13	0.66	0.95
		1.29847	0.11				7.55	37.13	0.08	171.86	24.78
		1.61291	0.26				0.89	3.47	3.34	0.32	0.75
		1.76438	0.2				5.02	0.79	0.11	0.25	0.3
		3.17053	0.19				1.39	1.84	0.28	2.38	20.08
		3.25481	0.35				5.22	0.8	0.44	0.98	0.79
		3.46348	6.89				1.97	0.16	0.05	0.16	0.75
		3.38801	0.1				4.91	1.78	0.41	2.26	18.41
		1.50566	0.19				1.9	2.31	9.31	1.48	0.17
		1.56616	2.84				3.66	0.93	0.9	0.34	0.07
		1.59061	0.33				65.44	1.32	0.32	1.94	0.03
		1.5265	0.64				2.48	1.54	2.2	0.59	0.13
		1.51949	0.55				0.09	22.18	0.58	1.49	0.43
		1.56938	0.04				0.11	51.01	0.74	0.66	0.12
		3.59887	0.24				1.08	1.82	2.7	0.59	0.27
		2.74894	0.54				1.69	0.61	0.52	0.18	0.18
		2.8162	0.23				4.41	0.07	1.76	172.98	0.45
		1.87354	0.61				3.89	1.43	0	0.02	0.37
		2.9632	0.11				81.4	0.47	3.39	0.1	0.13
		2.56628	0.02				0.4	0.67	0.61	0.64	0.13
		3.00109	0.16				0.17	3.75	0.99	0.52	0.43
		1.30493	0.35				136.07	8.47	0.52	0.06	0.03
		2.6197	0.02				0.58	2.01	0.3	2.45	0.26
		2.92172	0.1				2.72	0.44	0.3	0.22	0.02
		2.63725	0.27				174.4	0.86	3.01	1.44	0.44
		2.7246	0.03				48.27	0.07	0.04	0.48	0.05
		2.57405	72.77				6.55	0.37	0.63	1.34	0.32
		1.19253	0.19				2.19	52.57	0.16	0.44	0.18
		1.31036	0.21				7.15	4.41	0.23	0.36	0.11
		2.93381	0.41				4.52	2.07	8.73	0.86	0.24
		2.46701	1.22				0.18	1.32	1.1	0.65	0.27
		3.3353	0.02				6.59	0.62	1.7	1.21	0.52
		1.52454	0				4.15	0.16	0.93	0.91	0.69
		1.84875	0.74				2.22	5.03	1.73	0.69	0.75
		3.53348	0.07				2.13	3.07	0.96	0.33
		2.53029	0.15				6.35	1.71	0.63	162.54
		1.88846	0.23				67.78	2.82	0.94	0.01
		1.7544	0.16				0	0.24	0.84	0.1
		2.39377	0.17				1.97	2.95	0.4	0.35
		2.48104	0.01				12.9	1.12	0.6	175.55
		2.9771	0.21				3.87	18.58	155.49	0.66
		3.79134	0.04				2.28	54.67	0.02	2.76
		2.00594	1.77				0.08	1.08	4.74	0.19
		2.13331	0.05				0.3	2.85	1.9	5.07
		2.55707	1.29				3.92	9.98	1.17	1.4
		1.71649	0.29				1.75	0.55	0.63	0.36
		3.62792	0.24				4.57	0.02	0.09	1.35
		1.65114	3.78				3.92	2.03	3.99	0.59
		2.70754	11.53				98.65	1.39	0.29	1.07
		3.50786	0.09				0.81	1.33	1.72	1.89
		2.57345	0.14				0.27	1.42	0.47	1.21
		2.79827	0.19				156.48	0.7	1.09	1.28
		2.23849	0.81				7.85	0.99	0.23	0.35
		2.16838	0.08				1.03	0.58	10.21	169.94
		2.63106	37.48				1.11	0.09	0.59	0.15
		2.48572	0.75				0.22	0.79	2.2	0.44
		1.64486	0.2				208.29	1.16	2.88	166.49
		2.44201	0.25				37.48	0.93	2.71	0.82
		2.40073	0.13				6.06	0.81	0.8	0.82
		1.86543	0.12				1.81	46.09	0.36	3.68
		1.29832	0.41				3.19	4.12	0.52	1.51
		2.69395	0.05				0.38	2.03	0.41	0.07
		3.25048	11.2				3.43	37.79	1	1.83
		1.53055	0.13				2.65	2.57	0.41	0.53
		2.61948	0.17				3.73	6.5	176.09	1.37
		2.17879	2.19				1	2.22	169.5	0.65
		2.31921	0.09				69.86	0.15	4.92	1.22
		3.55635	0.04				10.22	1.87	1.61	0.65
		2.08766	0.18				2.56	0.52	0.52	0.3
		1.36651	0.08				3.44	0.52	0.41	196.92
		1.44097	1.33				1.54	1.36	0.17	0.65
		4.16865	0.06				0.09	22.06	0.08	0.25
		1.65661	0.34				19.82	59.97	3.04	0.4
		2.97047	0.13				1.79	0.46	0.69	0.67
		2.30223	0.08				4.75	10.79	0.65	2.51
		1.17574	0.74				3.26	0.8	0.11	0.43
		2.56509	0.48				104.8	0.01	10.89	3.1
		3.11232	0.68				0.99	0.48	2.23	1.67
		2.15541	0.19				1.1	0.59	0.67	1.28
		0.905919	2.27				0.04	0.62	0.82	0.17
		1.83391	0.33				169.65	5.57	2.41	1.54
		1.85401	1.1				7.15	0.09	0.66	0.92
		1.56631	0.76				1.14	0.15	0.31	0.36
		2.52091	0				280.78	22.67	2.43	1.58
		1.87251	0.02				1.93	0.52	5.63	0.84
		2.03995	0.05				44.93	60.38	0.5	0.02
		2.9552	0.07				9.07	4.03	0.57	0.93
		2.26297	0.1				1.86	1.51	0.34	0.35
		1.91756	0.32				3.85	1.47	0.15	0.13
		1.31698	0.89				7.7	0.39	182.92	0.36
		2.06027	0.21				6.84	0.49	174.19	1.8
		1.21911	0.06				0.49	6.82	0.21	2.11
		1.58408	0.63				2.69	3.5	0.78	0.58
		1.70439	0.98				14.24	2.89	0.16	6.43
		2.99475	0.05				24.88	1.4	0.6	1.28
		3.03635	0.22				7.17	1.34	0.29	0.56
		3.09633	1.02				0.11	2.08	3.07	0.29
		3.46782	0.02				0.75	0.61	1.01	1.7
		1.51715	0.01				4.09	0.87	0.53	0.21
		1.33403	22.82				69.33	1.98	0.08	2.29
		1.49734	1				0.78	27.06	0.22	1.13
		1.39962	0.66				2.18	0.18	1.14	0.57
		1.45405	0.35				0.18	60.37	0.69	70.86
		1.51287	0.36				0.86	16.86	1.96	1.05
		3.66995	0.72				0.88	0.54	0.39	0.19
		2.71569	1.17				1.73	0.02	0.91	0.77
		2.76332	0.31				6	0.48	0.38	2.25
		1.75754	0.56				3.49	0.37	0.49	2.46
		2.99494	0.12				101.7	1.81	0.51	0.4
		2.43066	0				0.19	10.33	1.12	6.81
		1.27737	0.54				189.35	1.24	0.37	2.31
		2.99995	0.9				4.82	1.28	157.46	0.12
		2.78193	0.05				0.51	0.1	186.55	23.32
		2.90002	0.45				0.27	0.44	0.08	4.83
		2.66662	0.24				351.92	0.11	0.81	0.16
		2.64497	0.07				2.82	0.62	0.03	1.37
		2.69948	63.91				47.97	0.38	0.75	1.41
		1.09683	0.29				6.28	0.45	0.1	1.49
		1.24705	0.66				1.97	59.21	3.37	0.67
		2.38899	1.35				3.3	3.61	1.38	2.9
		3.4508	0				6.31	2.95	0.64	80.94
		1.68407	1.08				5.97	5.99	0.1	0.58
		1.49477	0.24				0.47	3.17	1.71	0.07
		3.49635	0.01				1.36	2.03	0.43	0.48
		2.37789	0.34				8.5	0.81	0.21	2.4
		2.31628	0.25				3.62	2.38	1.49	1.55
		2.38474	0.16				3.7	1.55	2.26	0.29
		3.04045	0.05				9.94	0.32	1.48	6.53
		1.87783	0.6				0.21	60.81	0.41	2.09
		3.89102	0.07				5.84	2.41	0.91	0.17
		2.51474	0.43				3.77	1.14	3.15	2.71
		2.18432	0.63				67.18	24.44	0.34	1.58
		1.62538	0.02				2.3	20.72	170.06	67.52
		3.45519	0.34				0.23	0.83	159	1.68
		2.70041	1				0.51	0.04	0.22	0.83
		1.59178	0.54				1.37	1.42	0.09	3.18
		2.92738	15.18				5.3	0.76	0.84	0.08
		3.43964	0.16				3.41	0.69	0.17	1.18
		2.55123	0.13				118.39	0.77	0.19	23.98
		1.99134	56.75				0.97	8.36	3.52	0.92
		2.63712	0.14				1.17	0.04	1.46	19.15
		2.06538	0.21				0.08	0.89	0.87	2.96
		1.76331	4.55				213.76	0.41	0.19	2.42
		2.34199	2.71				7.76	10.77	3.72	0.16
		2.56558	38.2				0.75	0.89	1.21	8.07
		1.55064	0.19				1.09	0.47	0.11	1.65
		2.30812	0.9				353.5	0.06	0.51	0.2
		2.36769	0.04				2.15	92.64	1.53	22.06
		1.86289	0.12				51.19	4.67	3.87	3.19
		1.21029	0.39				8.52	39.66	0.36	1.28
		2.61146	0.15				1.24	1.94	0.31	1.92
		3.2071	8.85				4.38	5.85	0.94	0.57
		1.51977	0.06				6.47	2.88	0.42	2.92
		2.57564	0.17				5.94	2.32	2.63	81.43
		2.71337	17.11				0.59	1.82	2.03	0.65
		2.23612	0.16				1.07	0.08	0.4	0.89
		3.44493	0.06				9.93	60.18	155.07	2.6
		1.25285	0				2.5	4.3	0.41	1.91
		1.93798	0.22				2.77	0.69	0.19	0.28
		1.31911	0.18				7.03	1.94	1.16	7.42
		1.43663	1.99				1.09	2.87	0.44	0.18
		4.19716	0.19				44.3	30.99	1.09	21.79
		1.92286	0.37				3.67	7.48	2.05	22.19
		3.12098	0.54				64.32	17.94	0.19	2.73
		2.30693	0.16				2.57	0.8	4.13	0.2
		1.06513	0.79				0.6	0.03	3.12	1.43
		2.4037	0.63				11.32	0.98	1.32	1.53
		3.03522	0.11				0.21	0.54	2.02	1.2
		2.1723	0.22				1.28	0.97	0.21	3.59
		0.86837	2.61				5.02	1.44	4.11	81.37
		1.88085	0.23				3.72	0.03	1.09	0.64
		1.82567	0.35				127.26	0.81	0.66	0.76
		1.45262	0.22				1.26	0.18	2.99	2.28
		2.46171	0.02				0.38	18.36	0.5	2.64
		1.86751	0.03				0.15	45.49	1.01	3.42
		1.97983	0.16				227.82	0.4	0.92	0.71
		2.98417	0.16				323.16	0.91	1.07	2.88
		2.436	0.05				0.32	101.19	0.3	0.06
		1.84537	0.17				43.86	6.8	335.15	21.99
		1.17344	0.89				5.62	38.76	0.79	15.84
		1.52467	0.98				5.86	3.03	0.28	4.91
		1.53504	0.25				5.86	1.17	1.85	3.05
		1.68697	0.77				0.42	1.3	0.08	2.92
		3.06615	0.2				6.53	0.99	1.1	68.77
		3.15088	0.6				0.88	2.82	4.22	0.77
		3.3161	10.83				0.43	2.01	2.05	30.47
		3.39468	0.1				0.92	1.88	10.88	1
		1.41697	0.11				8.64	4.45	1.58	3.35
		1.43229	6.09				5.82	0.15	0.26	3.05
		1.46965	0.91				6.01	70.78	4.61	3.13
		1.40914	0.47				2.03	3.4	1.4	0.48
		1.48921	0.39				10.7	0.75	0.15	22.8
		3.46996	0.89				3.85	35.74	0.26	4.72
		2.67005	1.01				19.11	26.11	0.6	1.2
		2.57186	0.43				2.67	0.76	3.72	2.3
		1.7232	0.72				63.98	1.01	0.88	1.35
		2.74619	0.11				8.19	0.02	0.23	1.01
		2.27298	0.02				0.39	1.26	0.61	82.85
		1.18588	0.64				2.53	0.66	0.55	3.72
		2.90013	0.43				0.49	1.59	0.62	0.73
		2.49891	0.19				0.68	1.05	314.93	29.93
		1.21442	0.4				2.94	13	0.46	1.03
		2.74664	0.18				1.41	0.38	0.25	1.91
		2.56663	0.14				4.69	0.56	2.22	4.13
		2.38141	81.29				3.21	0.23	0.57	16.94
		2.67435	0.08				131.96	16.95	0.95	0.04
		1.08062	0.08				0.28	0.6	0.32	5.02
		1.24133	0.77				1.06	1.63	0.24	3.43
		1.56292	0.29				0.28	77.63	2.48	0.78
		2.40284	1.58				0.14	2.32	10.37	69.03
		3.47986	0.15				241.51	4.44	1.42	0.51
		1.65113	1.7				289.06	3.91	1.92	1.3
		1.43732	0.17				1.15	2.6	0.08	27.72
		3.47127	0.51				3.73	3.03	0.48	4.07
		2.30362	0.07				4.06	1.51	1.24	20.82
		1.64289	9.76				1.96	8.52	0.09	5.53
		2.36164	0.41				7.89	73.35	0.3	74.48
		2.32777	0.04				0.28	0.22	3.95	3.18
		2.89851	0.24				9.05	3.79	0.26	1.8
		3.58106	0.05				0.55	37.93	0.18	30.81
		1.74899	0.21				0.45	183.77	0.74	3.37
		2.4691	0.06				1.18	22.51	0.33	3.24
		2.11059	0.2				10.05	0.94	1.54	22.98
		1.59248	0.72				6.99	1.88	1.18	0.33
		3.35888	0.75				78.18	0.48	0.58	68.81
		2.76312	0.58				3.09	0.73	144.36	4.31
		1.39345	0.09				2.3	1.27	2.1	2.35
		1.55373	3.12				5.54	0	4.82	2.38
		2.68536	22.32				2.56	0.85	2.22	17.89
		3.16615	0.12				4.36	0.09	0.46	0.95
		2.45981	0.16				64.44	17.15	12.72	66.49
		1.97423	50.62				1.14	42.35	1.46	5.21
		2.60453	0.17				2.72	1.43	2.14	2.29
		1.99178	0.52				0.66	1.98	0.03	42.29
		4.11538	0.18				1.43	3.85	0.82	2.87
		2.37033	40.24				4.35	2.63	0.15	16.35
		2.2691	1.87				1.2	1.32	0.42	0.09
		1.51503	0.18				3.74	6.68	1.93	5.24
		2.18742	0.21				5.41	0.8	1.71	1.29
		2.30934	0.03				132.51	2.76	4.4	77.28
		1.73249	0.55				1.59	2.05	0.53	35.98
		1.14276	0.21				1.22	2.67	0.37	17.55
		2.58997	0.14				0.32	1.81	0.42	2.35
		3.09216	13.11				0.17	1.53	143.47	19.52
		1.3957	0.37				261.32	0.16	0.58	0.28
		2.59572	0.26				1.38	76.99	0.3	64.46
		2.73084	18.67				0.3	2.58	2.27	5.8
		2.30177	0.17				293.14	2.01	1.13	1.24
		3.32172	0.03				0.74	43.33	2.61	39.85
		1.17383	0.01				59.88	9.87	2.43	17.08
		1.83647	0.35				3.39	28.08	3.04	0.9
		1.22352	0.18				1.08	1.36	0.55	1.64
		1.49929	2.84				75.87	0.75	14.21	56.56
		1.5925	0.06				7.73	0.61	1.2	36.46
		3.02476	0.56				0.42	0.26	1.88	4.07
		2.2216	0.11				10.97	0.3	0.04	0.04
		1.08646	0.75				0.96	1.63	0.91	1.18
		2.33191	0.39				5.06	0.09	0.09	34.26
		2.90093	0.24				5.25	1.11	0.06	0.82
		2.18789	0.39				2.7	0.35	0.38	0.58
		0.874327	3.35				10.59	25.88	2.49	0.45
		1.73581	0.21				3.14	35.55	3.09	1.12
		1.77856	0.17				62.79	0.54	0.83	0.98
		2.29252	0.01				1.82	1.39	0.49	1.01
		1.75104	0				4.09	2.61	0.15	1.78
		1.95761	0.06				24.17	2.42	0.33	1.09
		2.97266	0.12				1.38	0.71	117.23	1.51
		2.22266	0.1				2.7	9.06	0.66	2.1
		1.8825	0.29				1.04	1.93	0.13	22.76
		1.23473	1.2				19.73	1.53	1.06	17.72
		1.87555	0.28				51.77	72.51	0.9	0.78
		3.45464	0.14				1.6	4.56	2.14	23.88
		1.44996	0.03				3.72	2.18	0.34	1.22
		1.42868	12.02				5.15	2.89	14.42	19.92
		1.48702	0.55				148.56	4.47	2.04	19.08
		1.37908	0.38				0.7	47.48	0.06	20.1
		1.40906	0.17				2.64	12.63	3.75	0.03
		2.75021	0.3				0.73	0.38	1	19.45
		2.22011	0				0.2	2.48	0.09	0.07
		1.19563	1.08				300.88	2.06	0.11	23.4
		3.06595	0.6				11.18	0.41	1.36	0.41
		2.60703	0.48				1.74	2.04	3.89	0.14
		1.13429	1.11				0.05	4.12	2.75	0.97
		1.51483	0.28				273.74	0.34	1.64	0.01
		1.71128	1.05				57.69	0.04	131.13	0.76
		3.11877	0.19				2.42	1.33	164.13	0.01
		3.16298	17.19				2.01	0.35	0.97	1.04
		2.81505	0.14				8.21	0.39	0.66	0.11
		2.6039	0.3				3.94	25.57	32.95	1.03
		2.55469	0.06				7.15	48.56	0.63	0.07
		2.54635	68.87				0.61	0.76	0.99	2.18
		1.12302	0.13				0.5	0.27	3.31	0.13
		2.20893	0.01				6.14	3.4	2.07	1.34
		1.21425	0.77				8	2.38	0.29	0.02
		1.45914	0.14				2.11	2.15	12.29	1.63
		3.13657	0.6				2.33	7.63	2.3	0.05
		2.61477	1.33				12.18	2.27	1.75	1.98
		2.58261	0.47				12.23	3.24	0.03	0.03
		1.66708	0.93				1.45	1.77	0.18	2.14
		1.59885	1.57				2.62	0.82	4.6	0.06
		3.54296	0.25				18.08	0.73	0.84	1.87
		2.24923	0.13				2.24	1.87	0.14	0.1
		2.69832	0.46				63.53	3.19	0.07	2.07
		2.26178	0.16				2.25	50.6	0.95	2.27
		3.73101	0.04				0.62	169.57	2.2	0.02
		1.56499	0.1				0.48	8.26	4.47	1.68
		2.28214	0.04				1.75	66.15	1.83
		1.8595	0.08				1.08	0.44	0.26
		1.50212	0.42				4.58	2.76	3.2
		3.27853	0.77				1.8	2.47	0.84
		2.52269	0.52				3.96	0.56	0.5
		2.23462	1.24				5.19	0.25	2.02
		3.43387	0.02				145.74	0.14	0.43
		1.4213	0.66				33.52	3	1.24
		2.67153	44.8				0.21	55.45	3.68
		3.24767	0.13				0.17	1.82	5.3
		2.3919	0.11				273.46	0.89	0.69
		2.65116	0.16				12.34	0.1	13.3
		1.95951	0.95				0.31	2.34	2.34
		2.06967	0.07				0.29	0.25	0.34
		1.64861	13.64				324.29	0.36	5.01
		1.64927	0.11				0.21	31.38	1.6
		2.15137	0.16				57.19	1.55	0.09
		2.31915	3.34				2.48	2.09	0.02
		2.45268	41.16				2.3	3.29	0.69
		1.44762	0.14				8.89	2.95	2.15
		2.11963	0.29				75.15	1.24	3.02
		2.23846	0.01				6.36	8.86	1.69
		1.71319	0.09				0.44	1.08	0.36
		1.14326	1.72				0.52	4.57	3.77
		2.60941	0.13				4.96	1.81	0.18
		2.56226	193.16				51.13	1.95	1.68
		1.40491	0.02				3.39	9.59	5.11
		1.54643	4.56				7.69	0.83	0.43
		2.46688	0.26				2.37	65.38	14.42
		2.15318	3.54				13.3	3.22	2.29
		2.11529	0.47				1	1.09	1.15
		3.00271	0.1				2.09	0.84	0.09
		1.75934	0.47				3.63	1.04	0.21
		1.13891	0.21				2.55	3.53	1.51
		1.35817	2.21				61.74	100.23	0.09
		4.1289	0.81				1.94	159.91	2.48
		2.94442	1.28				0.59	1.55	2.59
		1.43269	0.26				0.78	0.35	1.75
		2.15755	0.11				63.63	1.72	3.3
		0.968157	1.1				1.18	0.77	1.19
		2.36232	0.07				7.09	0.15	5.42
		2.85579	0.06				6.05	1.99	0.6
		2.19372	0.39				152.92	3.96	0.64
		0.850619	5.46				1.77	2.5	1.42
		1.70988	0.85				0.58	0.09	4.33
		1.67563	0.18				0.35	2.28	0.33
		1.43248	0.05				0.11	0.19	14.21
		2.37073	0.07				330.97	0.52	2.81
		1.77198	0.08				11.5	34.48	3.77
		1.83575	0.12				0.61	1.16	0.12
		2.83558	0.29				2.56	2.58	16.66
		2.26227	0.04				333.73	4.16	3.51
		1.83084	0.01				0.85	2.75	1.01
		1.33898	1.5				52.07	11.6	0.11
		1.89393	0.55				3.26	0.29	0.41
		2.63886	0.16				2.06	1.21	1.09
		1.17109	2.02				7.91	1.61	2.22
		1.42305	0.73				75.57	66.96	1.36
		1.67731	0.25				8.14	6.21	6.48
		2.89625	0.03				0.28	0.77	0.16
		3.14188	16.43				0.32	0.7	3.73
		2.85333	20.36				1.3	3.15	0.6
		1.41964	0.5				3.61	5.64	1.19
		1.23494	37.79				3.22	103.23	14.24
		1.47231	1.57				14.19	182.93	0.86
		1.25432	0.37				2.12	13.39	16.33
		1.38917	0.31				64.28	1.21	2.48
		2.29145	0.25				3.11	2.48	4.84
		1.19801	0.87				3.89	0.52	0.24
		1.34208	0.76				25.61	2.66	19.06
		3.58415	0.57				2.76	0.71	3.33
		2.53322	1.23				0.62	0.14	1.4
		2.53025	0.14				0.46	1.73	0.35
		1.65325	1.09				0.9	3.66	0.87
		2.841	0.24				1.11	2.66	2.31
		2.2419	0.02				1.34	1.13	1.6
		1.16263	0.65				7.22	1.65	5.8
		2.84595	0.59				6.07	0.24	67.78
		2.80219	0.29				164.14	1.79	0.63
		2.62268	0.35				45.18	0.18	3.19
		2.51433	0.06				0.66	0.13	0.38
		2.48874	58.02				0.12	40.44	1.5
		1.04443	0.05				367.49	1.23	18.12
		3.23241	0.58				11.06	1.13	4.75
		2.57228	0.17				0.37	1.33	3.65
		2.22141	1.26				0.86	2.69	0.44
		3.40661	0.39				370.02	2.74	15.58
		1.36137	0.06				0.1	2.47	3.82
		1.46094	1.74				51.04	7.74	0.43
		3.47012	0.51				2.06	0.46	17.64
		2.37074	0.12				2.1	2.08	3.23
		2.57586	0.22				11.22	1.53	0.71
		1.99319	0.24				74.81	1.15	0.1
		1.65044	8.95				8.31	6.08	0.56
		2.12962	0.02				3.84	0.58	0.83
		2.25571	0.01				0.32	0.53	3.36
		2.76642	0.12				0.17	1.23	2.57
		1.67835	0.36				2.53	3.31	1.37
		3.7162	0.01				3.24	8.33	6.1
		1.95961	0.18				18.43	111.76	60.62
		2.2548	0.46				66.01	16.66	0.07
		1.49454	0.3				1.46	66	61.04
		2.46026	0.14				1.52	2.32	6.64
		2.47767	191.89				2.32	0.42	0.63
		1.25024	0.4				4.07	3.05	34.37
		1.52873	3.86				260.28	0.14	1.36
		2.45012	52.85				21.41	1.48	19.78
		3.26498	0.42				2.45	4.13	4.2
		2.41759	0.1				0.82	3	4.17
		1.88136	47.36				0.38	1.96	0.84
		4.23855	0.77				0.91	0.15	16.56
		1.42286	0				61.08	1.88	3.24
		2.26834	2.1				1.66	0.21	0.64
		1.47532	0.15				7.97	0.4	16.27
		2.78385	5.31				5.76	44.88	4.12
		2.1253	0.04				163.08	0.56	1.2
		2.27589	0.07				31.31	41.05	0.14
		1.68611	0.41				0.6	3.89	0.72
		1.08112	0.44				0.83	3.35	0.93
		1.69969	0.22				0.29	10.23	3.16
		1.43622	0.46				390.56	2.28	1.3
		2.58112	0.42				437.71	2.21	6.81
		2.14721	0.48				0.45	5.22	65.83
		2.64544	17.3				49.89	1	0.39
		3.08259	0.13				3.47	0.64	1.8
		1.35127	0.98				1.25	0.82	0.49
		1.8267	0.31				0.89	9.05	1.56
		1.18482	0.22				12.71	0.4	16.07
		1.36054	3.33				0.6	130.75	5.41
		1.45057	0.1				1.38	104.15	4.41
		2.9285	0.87				2.18	145.11	2.02
		2.04677	0				0.09	11.75	21.95
		1.0077	0.79				11.91	1.7	3.15
		2.4076	0.43				77.13	0.46	0.17
		2.766	0.04				7.66	2.11	13.22
		2.25764	0.43				4.61	0.67	3.73
		0.850497	6.25				16.86	0.22	1.22
		1.82139	0.9				2.48	2.21	0.2
		2.40227	0.14				1.26	0.19	1.47
		1.68924	0.15				2.33	4.9	2.17
		1.85007	0.18				2.89	0.33	4.1
		2.76184	0.14				4.54	1.67	1.94
		2.10906	0.04				236.33	0.24	5.75
		1.732	0.26				28.96	2.89	65.16
		1.17266	1.24				1.23	0.25	0.48
		1.81794	0.55				58.85	0.34	0.38
		2.73523	0.16				8.27	46.27	37.23
		3.03938	17.33				2.92	0.43	1.55
		2.65416	25.83				5.31	1.98	14.71
		1.47497	0.17				0.33	4.33	7.67
		1.27215	41.62				0.52	3.98	4.37
		1.37102	1.24				4.25	1.58	1.44
		1.15525	0.24				4.75	9.98	21.43
		1.29451	0.33				1.48	0.49	3.02
		1.58894	0.55				7.76	2.06	12.38
		2.72097	0.07				6.79	1.85	0.11
		2.25078	0.13				158.53	13.41	0.42
		1.11484	0.75				0.81	1.14	0.51
		2.77943	0.32				0.21	6.61	3.13
		2.36346	0.25				0.33	0.77	1.61
		1.09669	3.59				0.15	0.73	5.26
		1.39719	0.75				393.31	1.77	63.48
		1.60404	0.72				0.35	3.1	0.18
		3.0522	0.15				1.77	116.72	6.1
		2.35883	0.19				456.17	58.53	1.68
		2.47947	0.05				0.03	161.94	0.6
		2.37961	80.23				51.2	0.77	34.9
		0.999767	0.24				4.29	2.44	4.51
		1.0937	0.64				1.71	1.14	21.03
		1.33144	0.53				75.14	2.52	2.07
		3.31113	0.81				10.83	1.44	4.33
		2.40093	1.47				0.94	0.14	4.67
		2.45916	0.3				15.1	1.39	12.43
		1.3422	0.39				0	3.67	22.11
		3.31384	0.59				4.24	3.52	1.89
		2.14346	0.22				9.3	0.66	0.73
		2.71175	0.45				2.78	2.06	2.75
		2.11163	0.14				4.07	0.07	1.98
		2.68493	0.01				12.76	2.03	6.06
		3.63832	0.02				3.04	0.2	0.32
		1.52973	1.33				55.84	0.31	6.21
		2.25763	0.92				15.55	52.75	1.46
		1.85361	0.46				3.25	5.94	1.08
		1.54752	0.3				4.11	3.06	96.18
		3.27263	1.01				3.46	0.14	1.97
		2.46	0.38				1.57	9.37	14.1
		2.21156	1.35				32.12	2.81	4.88
		3.22349	0.43				2.02	1.73	5.9
		1.45458	1.93				0.47	0.79	19.79
		2.65071	73.37				0.31	0.8	3.24
		3.16617	0.23				6.07	1.27	10.87
		2.31659	0.01				0.69	3.75	0.03
		2.43376	0.29				7.17	11.16	0.22
		1.91544	0.75				8.38	0.44	2.32
		1.88642	0.18				153.42	2.3	1.06
		1.70974	0.43				1.49	58.59	59.74
		1.57293	9.81				15.69	171.66	2.17
		2.05713	0.58				0.14	0.92	6.3
		1.32766	0.14				0.87	14.65	1.16
		2.14181	2.42				0.24	0.73	1.4
		1.49725	0.3				0.34	9.02	2.03
		2.67477	6.86				411.34	2.2	13.73
		2.01771	0.42				0.71	2.47	5.87
		2.10574	0.02				0.67	0.51	5.45
		1.58524	0.26				525.5	3.69	23
		1.10973	0.43				0.41	120.51	2.33
		2.4858	0.22				62.6	0.31	10.61
		2.39262	184.16				3.78	2.36	0.3
		1.29737	0.3				2.03	0.59	2.21
		1.5201	4.74				8.61	6.15	2.29
		2.74817	21.12				0.89	1.01	1.51
		2.13791	0.11				15.08	1.63	3.81
		3.23667	0.23				0.16	1.75	6.76
		1.13253	1.1				3.23	0.42	10.25
		1.743	0.41				9.03	3.69	1.15
		1.09348	0.24				69.56	0.26	1.7
		1.26564	3.39				3.62	0.15	15.55
		4.05202	1.09				5.54	71.8	5.84
		2.90823	1.37				14.89	0.4	5.37
		2.07741	0.17				3.03	4.17	26.16
		0.946236	0.61				2.77	2.66	3.34
		2.23313	0.1				5.05	3.29	8.17
		2.7755	0.15				4.96	9.9	0.23
		2.11938	0.29				24.32	0.14	2.55
		0.824045	5.77				1.14	1.86	3.11
		1.76382	0.3				56.08	1.48	6.9
		1.60703	0.34				14.39	7.39	4.48
		1.37947	0.13				2.4	0.55	1.35
		2.40458	0.49				5.65	0.74	2.52
		2.38608	0.1				1.09	1.67	15.79
		1.61908	0.5				0.3	3.21	7.96
		1.83844	0.18				53.6	0.47	5.72
		2.73617	0.29				1.73	116.05	27.38
		2.24006	0.04				3.88	155.44	2.89
		1.88254	0.04				10.68	174.08	8.41
		1.17154	1.7				168.92	0.58	0.17
		1.72555	1				1.13	1.52	2.41
		1.40043	0.61				0.47	1.65	6.86
		2.93541	0.19				0.28	1.97	3.85
		2.65367	19.98				0.44	0.95	0.42
		1.20148	51.74				234	3.31	12.6
		1.28825	0.16				406.07	0.13	1.1
		1.4411	1.46				13.7	2.11	2.21
		1.13393	0.8				0.54	0.53	14.58
		1.22723	0.49				0.72	6.92	5.22
		1.60041	0.46				537.24	1.28	4.24
		2.60971	0.38				0.35	1.61	29.91
		2.13911	0				50.57	2.9	2.84
		1.04637	0.79				3.23	0.11	8.75
		2.80012	1.36				2.63	4.13	0.44
		2.24471	0.42				12.69	0.16	2.33
		1.00396	4.56				73.6	0.37	8.63
		1.44942	0.33				8.58	73.18	0.8
		1.59173	2.3				0.7	0.36	3.21
		2.99832	0.26				3.03	45.21	4.41
		3.15556	15.41				0.31	4.57	2.91
		2.69496	0.81				3.43	0.14	13.51
		2.43757	0.22				14.43	1.54	5.35
		2.47033	65.31				3.25	1.05	6.17
		2.56729	0.24				7.66	4.38	6.07
		0.978248	0.12				1.77	8.88	2.63
		2.22576	0.1				2.25	20.36	1.16
		1.16794	0.64				4.15	0.03	3.92
		1.33588	1.17				6.14	2.65	9.19
		3.31768	1.1				234.1	15.28	3.27
		2.32266	1.76				1.13	0.47	15.14
		2.49185	0.33				62.49	1.07	4.17
		1.43196	1.81				25.85	1.54	6
		1.36434	0.17				3.35	3.02	5.52
		3.38402	0.66				4.63	0.91	2.32
		2.14733	0.22				0.99	333.09	9.39
		2.18879	0.06				0.94	77.66	0.9
		2.70223	0				53.43	0.79	3.55
		3.66613	0.01				1.28	3.46	10.08
		1.49412	1.39				3.78	0.69	3.57
		2.16846	0.69				175.66	2.77	14.46
		1.94846	0.47				1.27	1.6	5.37
		1.52482	1.35				0.66	0.12	6.72
		3.26793	0.69				1.13	58.04	6.32
		2.48399	0.38				1.3	0.44	2.41
		2.11314	1.45				0.15	5.75	1.17
		3.07654	0.46				0.39	1.74	3.96
		2.5098	82.88				273.42	0.07	9.67
		3.27271	0.36				429.3	3.57	8.73
		2.37984	0.1				15.52	0.31	1.57
		2.49949	0.15				0.8	0.22	6.42
		1.94989	1.24				0.22	84.24	6.72
		1.84076	0.11				570.44	0.05	2.39
		1.5434	12.09				0.25	2.26	10.32
		1.60106	0.84				52.82	2.41	1.25
		2.08807	0.2				3.61	0.18	2.85
		2.25917	60.71				2.08	2.3	5.13
		2.20747	2.5				13.28	2.37	11.83
		1.42419	0.26				67.84	1.08	9.39
		2.03404	0.62				12.8	1.21	3.91
		2.18695	0.03				0.86	11.93	6.88
		1.46638	0.32				1.19	0.66	20.66
		1.14252	0.38				0.25	1.08	1.29
		2.35473	0.38				90.86	0.39	3.78
		2.35951	191.37				3.75	3.46	10.03
		1.27503	0.6				13.18	85.14	4.67
		1.43186	3.7				2.8	286.36	15.68
		2.47624	0.66				1.41	0.79	10.28
		2.78232	18.21				2.44	3.09	3.93
		2.20263	0.05				3.9	0.54	3.72
		2.97591	0.38				4.91	3.64	19.49
		1.19278	0.36				203.87	1.01	1.27
		1.7642	0.78				1.8	0.54	5.9
		1.10221	0.38				60.76	57.49	10.19
		1.16206	4.43				2.44	1.39	7.9
		4.12814	1.35				3.35	3.95	3.77
		2.88855	0.16				5.1	1.32	7.47
		1.41518	0.85				1.01	13.1	4.41
		1.99736	0.09				23.3	1.51	20.09
		0.885638	0.69				4.82	0.33	1.99
		2.34283	0.13				4.69	7.85	1.11
		2.83985	0.04				1.79	0.71	58.04
		2.17086	1.32				1.77	0.47	10.63
		0.813675	8.36				12.79	77.89	10.84
		1.64335	1.09				163.15	2.25	6.56
		1.50911	0.17				0.76	2.68	20.78
		1.28161	0.48				0.88	1.21	2.26
		2.2526	0.1				0.49	3.3	1.88
		1.65005	0.09				0.33	3.09	5.7
		1.78462	0.24				301.5	16.44	10.36
		2.69726	0.75				444.5	0.26	21.74
		2.14291	0.14				615.32	2.48	2.36
		1.63541	0.05				0.48	0.68	3.8
		1.19537	2.63				56.94	2.29	16.24
		1.71972	1.57				3.55	4.08	17.03
		2.84815	10.53				1.85	212.23	2.4
		2.68735	22.89				11.55	303.23	50.66
		1.36895	0.31				3.61	0.73	17.95
		1.18416	45.29				0.77	0.98	22.09
		1.35932	1.04				16.58	25.21	2.99
		1.15754	0.66				0.88	3.34	4.5
		1.26834	0.7				0.21	0.2	10.66
		1.59631	0.59				6.76	3.34	14.23
		2.47361	0.32				0.37	0.81	19.13
		2.18079	0.14				14.83	62.76	2.67
		1.04044	0.74				70.07	2.34	20.06
		2.70243	0.78				14.01	0.14	3.41
		2.27471	0.39				4.25	51.13	20.67
		1.00049	5.63				1.96	0.05	2.1
		1.33857	0.68				4.35	10.34	30.81
		1.56381	1.16				87.01	1.29	22.07
		2.89297	0.07				4	0.32	2.51
		2.23831	0.61				5.21	10.8	4.59
		2.52575	0.04				590.17	0.42	26.96
		2.25671	60.28				1.52	0.48	20.93
		0.934563	0.1				53.58	73.62	27.04
		2.03684	0.38				59.26	2.56	22.27
		1.04936	1.28				28.38	0.07	0.04
		1.2241	1.21				1.88	2.66	42.79
		3.13499	1.69				3.35	0.57	2.17
		2.25301	1.92				4.68	2.1	34.1
		2.40327	0.69				1.42	2.07	1.58
		1.31686	0.34				0.52	12.64	21.88
		1.44433	3.09				4.82	1.2	0.02
		3.3181	0.86				1.14	3.5	1.97
		2.0734	0.04				1.32	0.96	29.75
		2.64569	0.55				14.53	3.01
		2.17958	0.02				184.23	55.22
		2.56279	0.01				0.78	243.19
		3.89684	0.06				0.44	286.66
		1.46544	1.35				0.34	1.31
		2.11438	1.02				0.74	28.36
		1.99311	0.71				616.06	2.57
		1.44668	0.48				0.35	0.48
		3.11161	0.59				281.71	3.44
		2.27233	0.72				16.16	0.93
		2.07955	1.46				0.87	5.3
		3.23462	0.33				0.8	0.13
		2.58344	91.03				663.16	57.92
		3.02015	0.52				0.1	1.27
		2.25798	0.01				58.94	9.21
		2.38121	0.29				4.13	2.32
		1.80323	0.72				2.28	8.5
		1.7238	0.01				72.22	0.2
		1.45421	24.28				10.79	0.51
		1.60827	0.4				3.84	100.98
		1.9543	0.21				0.75	0.22
		1.3086	0.98				0.61	2.65
		2.19372	1.98				5.91	0.47
		1.37557	0.47				16.73	3.36
		2.65512	13.04				4.83	0.59
		2.01173	0.17				6.96	2.41
		2.14868	0				22.95	1.38
		1.45736	0.14				4.02	2.03
		0.974003	0.37				11.35	2.48
		2.47646	0.18				1.99	4.32
		2.27518	191.5				4.96	2.82
		1.21631	0.82				52.96	0.36
		1.4644	8.28				1.84	245.64
		2.56284	0.42				59.09	293.8
		2.02064	0.44				214.17	1.31
		2.8094	21.4				3.46	1.36
		2.79661	0.29				4.51	0.32
		1.1392	0.35				1.22	1.63
		1.76765	0.45				0.49	0.21
		1.0802	0.29				0.55	0.76
		1.23556	5.2				50.72	3.11
		3.91072	1.01				1.1	0.68
		2.76837	1.18				1.62	55.06
		1.38296	1.01				16.37	3.93
		1.92559	0.4				178.57	0.16
		0.853326	0.7				1.69	3.67
		2.11229	0.12				0.68	1.2
		2.55948	1.2				0.76	12.25
		2.22056	0.69				29.3	1.84
		0.821375	10.72				0.25	2.81
		1.66243	0.16				286.76	1.45
		1.54641	0.24				414.21	12.96
		1.2769	0.97				16.1	0.07
		2.29515	0.24				0.79	0.11
		1.53022	0.01				0.5	131.92
		1.80926	0.22				676.07	0.65
		2.63908	0.71				0.49	0.19
		2.15061	0.17				56.52	3.29
		1.71033	0.09				4.03	0.49
		1.04542	1.65				2.46	3.09
		1.7178	1				15.75	1.39
		2.26515	0.73				9.22	0.43
		0.984359	5.9				2.92	1.69
		1.32476	0.38				0.88	2.38
		1.54713	0.53				3.34	2.41
		2.89355	0.18				0.39	1.18
		3.10175	17.87				74.01	291.05
		2.58607	22				3.52	275.5
		1.34269	0.71				6.61	0.82
		1.19887	42.61				25.35	1.58
		1.26495	2.63				1.9	13.18
		1.12266	0.59				13.21	3.42
		1.2231	0.84				2.19	0.76
		1.98045	0.09				4.87	3.33
		1.10475	0.88				3.44	1.27
		1.16759	0.96				195.78	48.89
		3.43822	1.7				30.39	0.26
		2.30229	1.33				1.48	2.95
		2.37989	0.76				62.59	1.17
		1.55353	0.8				3.19	13.35
		2.56926	0.35				4.76	1.92
		2.12176	0.02				1	16.16
		1.05545	1.05				0.58	0.3
		2.526	1.34				55.51	0.17
		2.62064	0.69				1.76	142.82
		2.36981	1.13				1.62	2.21
		2.52256	0.09				18.79	0.89
		2.33068	72.2				166.17	2.74
		0.981085	0.28				1.11	1.25
		1.88218	0.55				0.75	0.14
		1.38481	0.87				1.58	3.24
		3.02037	0.82				327.68	0.26
		2.23043	1.26				1	3.66
		2.08743	1.39				697.45	1.97
		3.30686	0.78				0.26	0.5
		1.47259	1.89				324.24	1.77
		1.34199	0.46				18.51	13.39
		3.35613	0.85				2.01	1.11
		2.06603	0.09				0.9	2.31
		2.36557	0.25				671.58	1.98
		1.89148	1.87				1.05	2.02
		1.71811	0.24				67.06	312.98
		1.54668	47.34				3.75	251.78
		1.58157	1.7				2.26	1.16
		1.96966	0.4				65.25	191.77
		2.22049	0.23				14.36	3.41
		2.52134	0.2				12.73	0.51
		1.43736	3.31				3.22	5.05
		3.93407	0.18				0.67	1.16
		2.07256	2.65				0	46
		0.974084	0.71				4.99	9.61
		2.40711	0.11				3.45	0.39
		2.33577	180.87				67.33	1.15
		1.17297	0.78				2.03	2.41
		1.46302	9.58				62.18	1.58
		2.99653	100.27				56.22	14.11
		2.89873	0.38				2.19	0.34
		2.17572	0.19				4.56	0.28
		3.97412	0.87				6.58	144.22
		1.34776	2.5				0.86	0.93
		2.14371	1.97				6.15	0.41
		1.28771	0.33				122.73	3.68
		2.65078	13.44				2.17	2.14
		2.19425	0.44				201.81	0.31
		2.15231	0.04				3.39	2.43
		1.42471	0.19				1.39	0.15
		1.43382	0.65				4.24	3.81
		1.21425	0.57				1.11	3.61
		2.58102	0.79				0.67	0.67
		2.05761	0.32				0.78	2.61
		2.76001	18.37				0.4	1.85
		3.05888	0.18				23.52	1.6
		1.11727	0.76				5.6	0.67
		1.68739	0.18				2.3	331.42
		1.10256	0.35				0.78	381.65
		1.07894	5.14				20	1.68
		2.71341	1.32				0	201.38
		1.37406	0.54				339.83	3.63
		1.91081	0				1.28	0.38
		0.903146	0.91				342.25	3.45
		2.17409	0.16				1.2	1.26
		2.66383	0.39				33.97	0.1
		2.26771	0.92				0.13	4.04
		0.834874	12.64				347.69	2.15
		1.55456	0.57				437.39	18.33
		2.33128	0.15				701.37	2.53
		1.55229	0.13				0.24	1.76
		1.77459	0.17				64.18	19.88
		2.72149	0.35				4.51	0.15
		2.01423	0.11				2.74	0.31
		1.87659	0.25				15.07	149.29
		1.14695	1.31				3.46	0.92
		1.66638	1.77				0.83	1
		2.79883	14.63				15.25	3.06
		1.34522	0.1				0.32	2.48
		1.23321	32.2				0.4	0.3
		1.2639	3.32				3.71	2.93
		1.08595	0.71				0	0.87
		1.15096	0.55				65.49	2.26
		2.49559	0.37				23.91	2.77
		2.07386	0.15				3.22	0.84
		2.53095	1.04				5.61	3.15
		1.03666	0.98				20.75	0.9
		2.34107	0.57				1.61	2.93
		0.998939	8.04				2.1	1.77
		1.22995	0.7				3.22	1.8
		1.49664	0.21				6.56	43.52
		2.73396	0.04				0.9	374.84
		2.99381	20.45				5.83	238.01
		2.17648	1.34				56.49	1.59
		2.46188	0.24				2.38	191.63
		2.21474	62.44				60.57	4.55
		0.950567	0.39				27.97	0.72
		1.05226	1.16				196.26	3.48
		1.21686	1.18				3.69	1.04
		3.18556	1.67				1.7	11.34
		2.24262	1.64				4.32	0.25
		2.51895	0.9				1.02	2.28
		1.55054	1.19				24.43	21.68
		1.22989	0.31				0.74	2.67
		3.17316	0.73				0.36	1.72
		2.00071	0.13				30.77	13.49
		2.5208	0.79				7.56	0.54
		1.99577	0.35				2.15	0.74
		2.56504	0.28				0.19	151.76
		3.76397	0.04				0.91	0.8
		1.46367	1.06				338.84	4.98
		2.11597	0.6				1.35	1.41
		1.93613	0.38				374.62	0.32
		1.39054	0.6				2.66	2.61
		2.93778	1.24				22.23	0.42
		2.29608	0.9				0.12	2.17
		2.00168	1.15				367.7	3.39
		3.02632	0.63				444.95	1.04
		1.3385	3.26				731.65	1.86
		2.92895	109.16				1.11	13.25
		2.89531	0.28				88.74	1.04
		2.09847	0.12				3.97	2.88
		2.39972	0.06				3.12	3.38
		1.80767	1.5				10.62	0.83
		1.38649	52.35				3.1	43.97
		1.86899	0.68				0.67	146.37
		1.46393	1.76				15.85	262.06
		1.8033	0.27				1.52	1.65
		1.23828	2.82				0.24	4.61
		2.18005	1.37				0	89.02
		1.36945	0.33				7.96	0.5
		2.57939	15.63				64.73	3.7
		2.00446	0.8				16.21	1.51
		2.03516	0.17				8.13	0.29
		1.43491	0.07				66.14	52.53
		0.964528	0.47				1.31	0.59
		2.3284	0.17				7.55	29.75
		2.23735	187.74				4.11	2.18
		1.32458	0.92				8.41	1.98
		1.36931	10.96				0.95	16.24
		2.37617	0.28				3.15	0.79
		2.21398	4.52				2.52	0.41
		2.08972	0.07				41.24	174.01
		2.93902	0.16				1.91	0.8
		1.63616	0.07				62.83	0.97
		1.05636	0.57				14.94	4.39
		1.14361	4.15				2.25	1.09
		4.06785	0.3				3.24	0.23
		2.77156	0.8				3.72	0.5
		1.38797	1.76				4.47	1.7
		1.78416	0.64				1.52	2.34
		0.764526	0.72				0.72	4.68
		2.19631	0.27				5.46	2.42
		2.56041	0.17				65.16	9.78
		2.24289	0.97				2.11	1.63
		0.772643	17.78				0.88	3.36
		1.59813	1.19				205.46	0.9
		1.48069	0.44				23.73	1.73
		1.21658	0.27				0.12	1.83
		2.23284	0.07				338.69	42.01
		1.35861	0.32				1.07	451.59
		1.71424	0.39				0.85	1.63
		2.70016	0.42				1.45	1.21
		2.04871	0.06				1.14	107.89
		1.65932	0.14				58.28	4.68
		1.0047	1.41				0.25	1.08
		1.69355	1.98				399.63	4.9
		2.85206	20.56				0.68	0.3
		3.20434	0.02				0.46	2.07
		1.36122	1.01				708.57	21.89
		1.19666	51.57				0.77	2.55
		1.14967	38				75.41	34.42
		1.0415	0.81				3.04	2.06
		1.22937	2.72				2.16	35.57
		1.53337	1.51				22.37	3.03
		2.48609	0.21				14.11	0.48
		1.99179	0.14				3.3	0.34
		2.51614	1.62				0.78	185.26
		1.00285	1.11				16.1	0.06
		2.33707	0.31				0.13	3.86
		0.947168	9.9				5.69	0.3
		1.21726	0.49				65.87	0.1
		1.44892	0.09				3.85	1
		2.83754	0.11				6.25	2.37
		2.49437	0.01				64.69	3.18
		2.1575	1.19				1.07	4.15
		2.44532	0.28				6.66	1.57
		2.15018	61.92				2.2	3.92
		0.959533	0.24				6.73	0.27
		2.07545	0.33				1.07	0.71
		1.01191	1.51				187.52	2.71
		1.155	1.41				41.77	471.71
		3.02285	1.98				2	1.76
		2.19048	2.2				64.01	1.01
		2.42777	1.2				18.93	0.93
		2.92344	0.63				2.63	194.77
		1.36549	2.14				4.31	3.05
		1.15248	0.13				1.91	0.81
		3.26951	0.83				3.49	1.52
		1.92315	0.08				1.3	46.29
		2.45415	0.62				0.73	3.57
		2.03223	0.5				6.75	0.67
		3.58383	0.03				1.63	0.03
		1.36346	4.85				59.69	27.69
		2.07399	3.46				1.77	3.79
		1.75405	0.13				0.42	34.38
		1.41212	1.52				197.79	2.05
		3.02577	1.17				25.62	32.34
		2.15776	1.26				0.12	3.1
		1.82424	0.91				216.79	1.12
		2.95673	122.46				0.65	0.44
		2.8696	0.38				0.52	179.9
		2.20864	0.04				2.15	0.93
		2.29792	0.12				2.05	3.4
		1.69128	1				371.31	2.29
		1.57511	0.34				0.32	0.08
		1.36142	51.65				409.14	2.5
		1.38666	1.34				21.04	0.27
		1.85592	0.45				1.1	0.84
		1.98149	41.34				0.58	2.31
		2.07304	1.08				805.26	2.4
		1.27359	0.36				0.67	1.21
		1.97177	0.46				61.45	3.14
		2.11633	0.27				3.74	0.75
		1.3915	0.13				2.01	1.04
		1.06316	0.07				57.16	2.52
		2.23016	0.22				28.17	1.78
		2.22506	186.85				12.97	358.92
		1.16897	0.99				4.06	272.76
		1.41242	11.3				0.79	1.98
		2.38369	0.64				0.34	1.84
		2.17642	4.29				8.33	201.93
		1.92068	0.25				3.24	2.98
		2.80965	0.64				9.15	0.59
		1.64979	0.1				62.19	4.45
		0.938729	0.25				0.91	0.51
		1.07561	3.82				2.35	3.82
		3.84437	0.52				18.77	0.11
		1.27997	1.75				5.68	30.49
		2.72922	0.67				6.54	3.19
		1.85878	1.64				1.24	31.52
		0.722881	0.93				2.09	1.52
		1.9328	0.01				4.72	39.73
		2.56487	0.07				206.03	2.92
		2.2679	2.09				39.18	0.47
		0.761182	15.29				60.41	220.97
		1.6314	0.06				205.83	1.31
		1.48882	0.45				3.75	1.61
		1.26434	0.13				3.68	3.6
		2.14121	0.31				1.53	1.05
		1.34354	0.15				3.42	0.17
		1.5771	0.31				1.46	2.73
		2.55911	0.85				1.22	0.89
		2.01784	0.16				6.79	0.15
		1.74342	0.04				2.32	1.29
		0.998714	1.7				0.91	3.76
		1.79629	1.72				29.31	1.46
		2.58977	0.02				81.33	4.58
		2.89927	17.23				1.77	0.97
		2.69126	25.2				0.33	1.42
		1.26944	0.53				2.42	262.38
		1.30428	28.2				169.05	2.12
		1.30793	2.64				1.6	212.71
		0.961086	0.66				340.82	3.45
		1.16389	0.71				0.31	0.58
		2.41399	0.73				448	1.65
		1.49055	1.64				20.15	332.62
		2.49902	0.29				1.49	4.11
		1.93818	0.08				1.06	0.59
		2.3226	1.3				817.35	14.8
		0.986168	1.23				0.76	5.58
		2.26383	0.56				77.99	0.57
		0.983931	10.81				4.01	4.03
		1.26073	0.35				2.7	39.96
		1.45829	0.29				61.72	1.37
		2.81452	0.14				27.06	42.57
		2.56694	0.49				15.74	3.17
		2.10974	1.31				0.2	0.53
		2.50238	0.18				3.18	0.17
		2.17521	57.45				0.61	0.73
		0.88832	0.1				1.5	0.58
		1.9695	0.56				0.06	4.66
		1.02949	1.23				1.36	2.5
		1.15891	1.35				3.79	0.23
		3.18499	1.67				8.04	3.72
		2.15881	2.43				62.49	0.64
		3.02639	0.78				0.53	0.71
		1.26285	1.28				2.77	1.13
		1.28699	0.35				63.21	3.23
		3.22178	0.58				2.7	3.83
		1.92879	0.36				27.11	4.05
		1.83322	0.33				6.03	0.38
		2.02283	0.5				2.82	0.82
		3.58235	0.01				8.65	1.65
		1.18255	2.3				1.03	41.15
		1.72874	0.31				5.12	544.95
		1.91197	0.91				199.09	2.23
		1.35475	1.51				2.54	2.17
		2.87956	1.77				42.69	191.15
		2.15046	0.59				193.43	3.37
		1.8261	1.26				4.34	0.96
		2.6461	137.46				1.49	1.5
		2.7406	0.42				3.19	0.61
		2.24013	0.02				1.22	33.49
		2.21495	0.07				0.95	1.86
		1.76134	4.19				0.11	3.44
		1.38895	61.73				1.82	42.97
		1.61484	1.11				55.64	1.68
		1.42041	1.15				2.02	55.58
		1.45613	3.96				0.05	2.65
		1.98306	1.15				33.97	5.28
		1.26834	0.39				93.44	0.46
		1.97401	0.52				0.83	0.1
		3.02061	26.92				2.32	3.96
		2.02084	0.23				202.15	2.67
		1.32189	0.06				3.29	0.26
		1.03255	0.91				0.25	2.81
		2.15058	0.31				631.17	0.53
		2.26026	175.14				465.32	0.24
		1.18469	1.18				20.09	1.02
		1.46839	12.99				0.72	3.71
		2.30192	0.6				0.13	1.92
		2.00999	0.05				889.21	4.81
		2.82455	21.4				0.37	11.79
		2.83421	0.48				68	2.68
		1.04938	0.82				5.19	1.68
		1.53701	2.05				10.35	2.6
		0.969634	0.3				60.86	570.19
		1.09746	3.93				26.71	2.13
		4.00964	0.35				4.43	2.1
		1.29285	2.07				16.38	203.74
		2.64026	1.93				0.29	2.86
		1.78229	1.91				2.77	1.32
		0.771607	0.64				1.11	1.25
		2.17657	0.03				0.37	39.1
		2.4842	0.64				4.39	1.39
		2.2809	1.71				4.14	1.76
		0.789017	22.68				8.31	36
		1.48403	0.87				63.07	3.29
		1.43606	0.49				0.37	41.34
		1.23616	0.31				2.64	2.23
		2.16923	0.17				4.44	66.89
		1.544	0.1				8.86	2.25
		1.65972	0.26				1.86	0.85
		2.64574	1.09				1.6	5.7
		1.91703	0.11				5.88	0.4
		1.65895	0.08				2.68	0.81
		1.01993	1.31				2.74	0.24
		1.66622	3.03				152.09	0.79
		3.18948	0.83				63.19	1.02
		1.19588	0.88				63.01	2.82
		1.28903	32.76				28.01	1.71
		1.19999	24.93				197.52	4.4
		0.989312	1.05				3.62	2.65
		1.14266	0.55				1.25	5.49
		1.46859	3.18				3.31	2.14
		2.47609	0.24				1.16	1.52
		1.88819	0.33				1.37	2.63
		2.48774	1.04				5.04	2.19
		0.962269	0.88				55.43	2.52
		2.25023	1.14				1.52	200.47
		0.911636	14.58				0.43	3.28
		1.24014	0.85				31.08	0.69
		1.37873	0.44				95.5	1.26
		2.56435	0.05				1.42	348.09
		2.8616	19.19				0.56	6.71
		2.1883	1.68				217.49	1.76
		2.04216	63.4				3.49	6.57
		2.35296	0.18				3.08	0.46
		0.923248	0.09				0.04	34.78
		1.00009	1.76				605.95	3.88
		1.16089	1.49				500.62	43.8
		2.95718	2.14				0.55	1.61
		2.2179	1.92				854.67	73.94
		2.34377	0.76				0.47	4.43
		1.41125	2.09				77.18	0.72
		1.15209	0.25				5.86	4.02
		3.05623	0.44				2.41	2.29
		1.90679	0.73				3.74	0.22
		2.40906	0.69				21.33	1.17
		1.98613	0.4				0.16	0.49
		2.28127	0.1				3.48	1.35
		3.75925	0.01				0.83	2.6
		1.3088	0.1				23.38	4.21
		1.89434	0.12				1.37	6.23
		1.86101	0.25				0.19	1.55
		1.29171	1.22				2.56	1.37
		2.9405	2.14				0.43	382.61
		2.01765	0.42				63.87	454.85
		1.81755	1.01				31.38	4.15
		3.11518	0.65				4.48	1.52
		2.65203	144.75				6.43	2.28
		2.74905	0.28				61.44	3.32
		2.21428	0				0.16	1.77
		2.27413	0.15				6.55	2.35
		1.78555	5.36				5.42	3.9
		1.43644	64.38				10.76	1.19
		1.61411	1.18				2.15	14.53
		1.47484	1.37				1.72	7.86
		1.80087	0.82				2.93	40.67
		1.32161	3.67				36.25	1.12
		2.02499	0.9				2.83	2.96
		1.23128	0.66				64.13	43.08
		1.86276	0.46				32.15	1.75
		2.81574	20.42				2.36	95.52
		1.98183	0.49				4.68	4.03
		1.42494	0.08				3.35	0.67
		0.976698	0.08				0.83	3.91
		2.30136	0.66				3.63	1.9
		2.13469	171.86				1.25	0.13
		1.14369	0.97				1.57	1.37
		1.45489	14.83				385.12	0.14
		1.98768	0.04				5.48	1.09
		2.64911	19.5				5.21	3.29
		2.75356	0.24				57.44	4.06
		1.08088	0.71				2.32	0.86
		1.51319	0.13				0.16	1.43
		0.961663	0.35				187.66	11.47
		1.0427	4.05				40.23	433.51
		4.11606	0.51				134.18	4.16
		2.79051	1.47				1.87	2.93
		1.88318	2.12				0.43	3.04
		0.724244	0.96				2.18	194.46
		2.01301	0.32				3.64	1.76
		2.47027	0.25				211.18	1.65
		2.2018	2.38				2.03	2.35
		0.740341	36.68				305.7	36.3
		1.5224	1.33				0.08	3.58
		1.43991	0.65				488.31	1.26
		1.21051	0.76				26.81	13.66
		2.26911	0.98				1.8	7.95
		2.10399	0.16				0.31	43.27
		1.60739	0.04				2.87	0.97
		1.62321	0.33				2.04	3.57
		2.6123	0.73				895.36	44.64
		1.87726	0.18				0.28	2.41
		1.57965	0.1				97.55	4.3
		0.963273	0.78				6.25	1.39
		1.23104	25.62				1.7	3.96
		1.64277	5.89				61.75	5.53
		0.921127	14.04				30.22	2.15
		1.1426	0.5				15.87	0.42
		1.38789	0.1				0.1	1.36
		2.59169	0.18				2.51	0.37
		2.85235	22.19				0.65	1.33
		2.5619	23.42				0.85	4.06
		1.17177	0.86				5.56	1.37
		1.13069	34.16				3.65	4.99
		1.23163	2.62				11.4	1.19
		0.946274	1.02				57.72	9.84
		1.1527	0.49				0.32	3.11
		1.10572	2.57				53.43	370.12
		2.7791	2.38				23.03	464.6
		2.01709	2.26				2.31	3
		2.30264	1.48				6.51	2.77
		1.36527	1.87				2.28	4.31
		2.22454	0.34				10.55	2.74
		1.75223	0.27				1.62	4.35
		0.922504	0.92				2.18	2
		2.3371	1.94				3.73	14.17
		2.30598	0.59				188.54	10.09
		2.42984	1.49				4.23	1.41
		1.99528	1.96				62.67	2.61
		2.33679	0.66				5.47	58.3
		1.54637	0.5				2.84	2.14
		0.916315	0.02				1.61	5.21
		1.92023	0.46				3.37	3.56
		1.00074	2.57				1.71	0.21
		2.67519	1.72				1.56	0.98
		2.0422	0.59				415.06	0.52
		1.8159	1.73				4.14	0.95
		3.0074	1.05				1.85	2.38
		1.39181	2.53				56.69	3.87
		1.14457	1.05				1.75	1.78
		2.68567	82.06				0.2	5.11
		1.76533	0.65				191.24	3.21
		1.23851	53.77				48.2	2.22
		1.45895	2.3				156.19	9.49
		1.70141	0.65				1.76	346.64
		1.83874	0.62				0.99	455.43
		2.38878	0.18				2.67	5.58
		3.60202	0.01				3.88	2.11
		1.15887	1.37				241.38	5.48
		1.82225	1				2.55	1.79
		1.70081	0.46				500.06	3.62
		1.36021	0.84				0.2	5.03
		2.05422	172.98				520.85	2.39
		1.15698	1.2				931.93	15.96
		1.46145	18.98				0.36	9.61
		2.50089	146.41				85.5	1.31
		2.62287	0.44				7.59	2.91
		2.07985	0.02				5.75	58.04
		2.04668	0.1				2.89	1.92
		1.63559	5.35				0.64	5.52
		1.56084	1.57				21.75	3.81
		3.89234	0.41				1.55	0.13
		1.2487	5.34				0.23	0.92
		1.9178	1.32				1.19	0.43
		1.24813	0.7				7.51	1.11
		1.83749	0.7				58.93	1.97
		2.59116	20.02				31.55	2.6
		1.9481	0.28				2.59	2.27
		1.21518	0.12				3.68	3.02
		0.973327	0.34				21.96	1.83
		2.1259	0.64				13.26	0.15
		1.05661	0.33				55.86	0.95
		2.26818	0.52				0.56	2.25
		1.90238	0.11				3.59	482.23
		2.65358	22.04				13.45	5.37
		2.55549	0.82				1.96	5.43
		0.965997	6.32				2.84	1.08
		1.60929	0.1				4.5	4.02
		0.906876	0.4				181.54	330.65
		1.01556	2.77				5.3	5.08
		2.71944	2.31				62.7	2.42
		1.72618	4.24				106.25	14.61
		0.693086	0.75				63.74	0.55
		1.98347	0.02				2.6	38.56
		2.42306	0.06				3.87	2.77
		2.18989	2.45				6.04	61.39
		0.733017	37.87				3.54	1.91
		1.49937	0.34				2	140.21
		1.3276	0.85				4.83	5
		2.0076	0.22				2.14	396.7
		1.47598	0.23				0.73	9.39
		1.53589	0.69				401.42	1.16
		2.46951	1.44				6.63	2.83
		1.84077	0.12				53.46	3.96
		1.48659	0.12				1.79	2.7
		0.981381	0.48				0.18	0.26
		1.18455	24.95				207.45	1.32
		1.64303	5.95				52.51	1.02
		2.58315	20.7				163.45	2.65
		2.60187	22.15				0.75	4.13
		1.20921	0.44				0.59	2.62
		1.1376	37.13				1.26	5.71
		1.35941	3.47				4.23	1.39
		0.88938	1.19				243.82	1.9
		1.12482	0.79				1.71	9.19
		1.40142	1.84				478.88	479.66
		2.20642	0.48				0.14	4.98
		1.94866	0.15				537.48	2.11
		0.873856	0.7					4.35
		2.43499	1.34					2.41
		2.32988	0.44					4.89
		0.877348	18.11					44.8
		1.11521	0.8					5.08
		1.38871	0.16					13.69
		2.71988	0.12					38
		2.27292	0.36					0.7
		2.02454	0.86					1.5
		2.24715	0.65					57.17
		1.79782	47.14					3.22
		0.869388	0.24					174.3
		0.984196	2.86					4.35
		1.0853	1.78					10.42
		2.89527	2.91					1.51
		1.98669	2.51					0.88
		2.34225	1.21					5.67
		1.30364	2.31					2.78
		1.19775	0.93					0.23
		2.8709	0.84					1.98
		1.81684	0.76					0.7
		2.45043	0.91					1.72
		1.86701	0.97					4.12
		2.18187	0.69					2.32
		3.70931	0.05					5.26
		1.03902	1.32					9.51
		1.83793	0.7					483.58
		1.58074	0.36					7.54
		1.26604	1.54					2.71
		2.67684	2.61					5.4
		2.08448	0.33					6.36
		1.76504	1.82					34.93
		2.9864	1.07					4.78
		1.40621	22.18					10.64
		2.30604	162.54					1.91
		2.69498	0.49					0.48
		2.00569	0.01					2.02
		2.2054	0.1					61.34
		1.61584	6.98					2.31
		1.57764	1.1					5.93
		1.35346	51.01					8.49
		1.32279	1.82					3.12
		1.74934	0.57					0.15
		1.83648	1.77					3.04
		1.21321	0.61					4.36
		2.8163	21.25					2.78
		1.83278	0.4					1.36
		1.82275	0.13					0.17
		1.17771	0.07					1.8
		0.894077	0.51					3.89
		2.10896	0.35					1.59
		2.02906	175.55					11.41
		1.03858	1.43					0.81
		1.15498	0.47					57.1
		2.35846	0.66					632.57
		2.13184	2.76					6.05
		1.84733	0.08					4.25
		2.8335	0.83					3.76
		1.43263	0.67					5.58
		0.838628	0.53					6.42
		1.00211	3.75					13.28
		3.85608	0.59					10.46
		1.26478	8.47					46.25
		1.34438	2.01					0.54
		2.52866	1.71					3.25
		1.78906	3.34					58.08
		0.709892	0.73					2.33
		1.78641	0.11					6.25
		2.38137	0.19					2.33
		2.22802	5.07					1.18
		0.712332	47.12					2.67
		1.49614	0.44					3.86
		1.29649	0.86					1.14
		1.92674	0.28					0.29
		1.45259	0.07					2.72
		1.6033	0.44					5.58
		2.45001	1.4					1.69
		1.79744	0.05					2.65
		1.67421	0.41					5.38
		0.949639	0.34					0.93
		1.51924	9.31					10.88
		2.6426	23.9					506.15
		1.19052	0.37					4.94
		1.16094	52.57					6.42
		1.23909	4.41					4.37
		0.874073	1.82					4
		1.15964	2.07					347.1
		1.3617	1.32					4.65
		2.36208	0.36					13.45
		1.69849	0.9					1.38
		2.3955	1.35					2.58
		0.855543	0.69					62.39
		2.36351	0.59					3
		0.910913	15.21					6.22
		1.15117	0.62					8.72
		1.25825	0.16					3.12
		2.55627	0.11					2.57
		2.72832	21.89					0.92
		2.25436	1.07					0.87
		2.0826	1.89					2.94
		2.25765	1.21					4.75
		1.4652	5.03					1.04
		0.881562	0.02					2.34
		1.76738	0.32					2.36
		1.04059	3.07					6.69
		1.06571	1.71					0.66
		2.84337	3.4					9.82
		1.99859	2.2					546.56
		2.34967	1.28					9.48
		2.84925	0.73					8
		1.15591	2.82					5.94
		1.13176	0.24					12.86
		3.11174	0.44					2.21
		1.72775	0.58					41.65
		1.75528	0.74					3.13
		3.6355	0.08					70.7
		1.1072	2.95					7.24
		1.93419	2.7					6.04
		1.59679	0.52					9.22
		1.21036	1.12					2.31
		2.70255	2.9					20.04
		2.14629	0.35					3.33
		1.68114	1.76					3.36
		1.35846	18.58					0.98
		2.25327	169.94					1.49
		2.62064	0.52					2.33
		1.997	0					5.09
		2.14746	0.15					1.96
		1.54146	3.39					9.45
		1.24582	54.67					7.48
		1.44434	1.08					713.11
		1.33167	2.85					8.99
		1.68589	0.61					13.04
		1.25757	9.98					6.11
		1.93549	0.99					10.66
		1.21981	0.55					0.43
		1.81887	0.52					4.71
		2.87264	19.39					76.1
		1.91714	0.3					6.01
		1.15673	0.02					7.08
		0.939777	0.08					11
		2.07855	0.44					0.27
		2.04522	166.49					0.57
		1.00611	2.03					1.07
		2.25508	0.82					2.62
		1.766	0.3					3.31
		2.73892	20					3.01
		2.55258	0.98					3.18
		1.00579	1.39					1.9
		1.41301	1.33					8.09
		0.85168	0.3					9.4
		0.933311	3.49					729.26
		3.97936	0.61					7.15
		1.31959	1.42					2.91
		2.53097	3.9					10.35
		1.79807	3.01					6.53
		0.746872	0.97					13.36
		1.80506	0.04					1.29
		2.40768	0.82					4.01
		2.16621	3.68					71.56
		0.755389	55.82					7.29
		1.38261	0.7					2.17
		1.31026	0.99					4.74
		1.1723	0.58					11.55
		1.92616	0.63					51.64
		1.4193	0.09
		1.46244	0.79
		2.33974	1.51
		1.74134	0.16
		1.5141	0.23
		0.943587	0.69
		1.55161	8.73
		0.885523	17.31
		1.07797	1.16
		1.27181	0.93
		2.33673	0.07
		2.7336	19.82
		2.51822	23.32
		1.21783	0.81
		1.14306	46.09
		1.11968	4.12
		0.847994	1.6
		1.16057	2.03
		1.37169	37.79
		2.60319	4.28
		2.18069	1.83
		1.32984	2.57
		2.14008	0.53
		1.57446	1.1
		2.23711	1.37
		0.847298	0.81
		2.17796	0.65
		2.31973	1.22
		1.931	1.7
		2.34348	0.65
		1.47431	6.5
		0.853252	0.32
		1.62942	0.93
		0.986805	2.65
		1.6217	1.73
		2.86989	0.71
		1.13786	2.22
		1.11343	0.15
		2.88508	0.4
		1.63486	0.96
		1.27915	1.87
		1.65296	0.63
		1.86414	0.94
		2.1381	0.3
		3.44219	0.05
		1.04659	0.52
		1.77026	0.84
		1.67678	0.4
		1.17824	0.52
		2.55005	2.8
		1.9046	0.6
		1.98537	155.49
		1.05097	1.36
		1.37722	22.06
		2.14566	196.92
		2.41497	0.65
		1.99118	0.02
		2.09119	0.25
		1.5087	4.74
		1.22494	59.97
		1.44045	0.46
		3.7354	0.19
		1.22805	10.79
		1.82755	1.9
		1.18673	0.8
		1.81997	1.17
		2.69761	16.78
		1.76014	0.63
		1.14466	0.01
		0.894486	0.41
		2.08981	0.4
		1.29115	0.48
		1.1187	0.59
		2.26247	0.67
		1.74341	0.09
		2.12582	2.51
		2.5765	1.64
		1.44778	0.62
		0.842587	0.46
		1.00371	5.57
		2.52493	1.48
		1.75826	3.99
		0.675169	0.53
		1.70349	0.29
		2.21433	0.43
		2.20305	3.1
		0.750982	72.71
		1.51713	1.72
		1.90397	0.47
		1.426	0.09
		1.55299	1.09
		2.30847	1.67
		1.71379	0.23
		1.4381	0.15
		0.934659	0.4
		1.54554	10.21
		1.19806	22.67
		2.70343	20.58
		2.52024	19
		1.18729	0.52
		1.11617	60.38
		1.16079	4.03
		0.856348	1.14
		1.02337	1.51
		2.1232	1.28
		1.32232	1.47
		2.0631	0.17
		1.75795	0.59
		2.26093	1.54
		0.838356	0.62
		2.16266	0.92
		0.920128	19.24
		1.06263	0.39
		1.23025	0.49
		2.48666	0.36
		2.17315	1.58
		1.92706	2.2
		2.30143	0.84
		0.85312	0.43
		1.4507	6.82
		1.02337	3.5
		1.04575	2.89
		2.509	4.81
		1.94681	2.88
		1.63098	2.71
		2.77773	0.5
		1.20639	1.4
		1.0347	1.34
		2.53112	73.19
		1.65094	0.8
		1.35472	2.08
		1.56224	0.36
		1.76194	0.52
		2.17718	0.02
		3.48878	0
		1.07013	0.61
		1.6864	0.41
		1.63782	1
		1.16677	0.87
		2.55142	2.81
		1.94433	0.41
		1.97495	176.09
		1.05305	1.98
		1.35928	27.06
		1.8705	169.5
		2.43671	0.93
		2.0596	0.35
		2.0583	0.13
		1.5016	4.92
		1.40485	0.18
		1.29695	60.37
		3.84083	0.54
		1.18834	16.86
		1.79762	1.61
		1.20155	0.54
		2.85651	22.16
		1.78731	0.52
		1.71128	0.41
		1.16212	0.02
		0.942385	0.06
		1.9693	0.17
		1.08505	0.48
		2.15913	0.36
		1.74084	0.08
		2.54516	20.2
		2.45439	1.8
		1.06555	0.37
		1.38263	1.81
		0.838753	0.65
		0.905336	4.56
		1.22065	10.33
		2.44794	2.11
		1.73124	3.04
		0.666879	0.33
		1.71934	0.69
		2.27364	0.58
		2.11228	6.43
		0.723983	80.71
		1.3581	1.24
		1.20902	1.28
		1.84927	0.65
		1.33004	0.1
		1.42663	0.44
		2.33015	1.28
		1.76831	0.11
		1.33555	0.11
		0.92491	0.48
		1.52799	10.89
		2.16218	0.56
		0.951363	20.45
		1.00159	0.62
[truncated: 3,763 more rows]

[truncated: 1 more sheets: Figure 6 Supp2 Panel C]
