# Supplementary material for: TREM2 regulates purinergic receptor-mediated calcium signaling and motility in human iPSC-derived microglia
Source: eLife. 2022 Feb 22;11:e73021. doi: 10.7554/eLife.73021 (PMC8906810; doi:10.7554/eLife.73021)
Supplement: Figure 7—source data 1. — In this dataset, the results of directional migration and inhibition of purinergic receptor activity are included. [file elife-73021-fig7-data1.xlsx]

## Sheet: Figure 7A
		WT					TREM2-/-
Veh		0.238095	0	0			0.229277	0	0
ADP		0.978836	0.846561	0.873016	1.42857	0.873016	0.784833	0.202822	0.652557	0.176367
Number of families	1
Number of comparisons per family	6
Alpha	0.05
Tukey's multiple comparisons test	Mean Diff.	95.00% CI of diff.	Below threshold?	Summary	Adjusted P Value
WT veh vs. WT ADP	-34.8	-54.23 to -15.37	Yes	**	0.0011	A-B
WT veh vs. KO veh	0.1111	-21.61 to 21.84	No	ns	>0.9999	A-C
WT veh vs. KO LPS	-14.17	-34.49 to 6.156	No	ns	0.213	A-D
WT ADP vs. KO veh	34.91	15.48 to 54.34	Yes	**	0.001	B-C
WT ADP vs. KO LPS	20.63	2.784 to 38.48	Yes	*	0.0228	B-D
KO veh vs. KO LPS	-14.28	-34.60 to 6.045	No	ns	0.2079	C-D
Test details	Mean 1	Mean 2	Mean Diff.	SE of diff.	n1	n2	q	DF
WT veh vs. WT ADP	3	37.8	-34.8	6.457	3	5	7.622	11
WT veh vs. KO veh	3	2.889	0.1111	7.219	3	3	0.02177	11
WT veh vs. KO LPS	3	17.17	-14.17	6.753	3	4	2.967	11
WT ADP vs. KO veh	37.8	2.889	34.91	6.457	5	3	7.646	11
WT ADP vs. KO LPS	37.8	17.17	20.63	5.931	5	4	4.92	11
KO veh vs. KO LPS	2.889	17.17	-14.28	6.753	3	4	2.99	11

## Sheet: Figure 7B
		Figure 7B
		Effects of P2Y12 receptor inhibitor PSB 0739 on Peak ADP (2.5mM) Ca2+ response in 1mM Ca2+ buffer
		PSB 0739: 10mM (pre-incubation for 30 min before agonist addition); Solvent control: DMSO
		Each data point is single-cell baseline subtracted Fluo-4/Fura-red ratio
		WT_peak-BL	KO_peak-BL	KO_peak-BL_PSB
		1.36927	1.84843	1.27383
		0.997429	1.77267	0.815437
		1.66878	1.5824	0.715053
		1.40647	1.81061	0.8582
		1.18326	1.81561	0.537845
		1.10167	1.65189	0.657524
		1.26696	1.30045	0.818924
		1.56891	1.75476	0.815435
		1.40255	1.7058	0.576155
		0.03483	1.81995	0.136167
		1.33043	2.01675	1.02044
		0.825817	1.77553	0.12367
		0.152896	2.05406	0.101476
		1.02102	1.62253	0.191689
		1.03774	1.83709	0.795557
		0.036533	1.57034	0.699001
		1.28585	1.41271	0.370238
		1.54478	1.82281	0.11621
		1.39577	1.55835	0.091595
		0.94968	1.89626	0.786852
		1.31654	1.79451	0.809102
		1.71297	2.03073	0.666236
		1.11114	1.6855	0.5907
		1.44638	1.77188	0.847149
		1.22485	1.7246	0.066741
		0.596353	1.78357	0.094939
		1.09517	2.01496	0.703028
		0.02247	1.54186	0.881973
		1.24529	1.75501	0.747934
		0.886712	1.85153	0.08287
		1.68157	1.70706	0.761679
		1.01475	1.70969	0.86428
		1.3708	1.79179	0.093016
		1.25389	1.94021	0.95006
		1.09172	1.68419	0.930273
		1.56405	1.7748	0.075473
		1.38594	1.98855	0.931198
		1.20378	1.90393	0.909158
		1.40352	1.87112	0.965443
		1.733		1.01162
		1.63682		0.94256
		1.05267		0.846078
		1.12959		1.02542
		1.32667

## Sheet: Figure 7C
WT + ADP	KO + ADP	KO + ADP + PSB0739
276	97	236
185	149	291
273	180	333
251	155	330
Number of families	1
Number of comparisons per family	3
Alpha	0.05
Tukey's multiple comparisons test	Mean Diff.	95.00% CI of diff.	Below threshold?	Summary	Adjusted P Value
WT + ADP vs. KO + ADP	101	19.97 to 182.0	Yes	*	0.0172	A-B
WT + ADP vs. KO + ADP + PSB	-51.25	-132.3 to 29.78	No	ns	0.2348	A-C
KO + ADP vs. KO + ADP + PSB	-152.3	-233.3 to -71.22	Yes	**	0.0014	B-C
Test details	Mean 1	Mean 2	Mean Diff.	SE of diff.	n1	n2	q	DF
WT + ADP vs. KO + ADP	246.3	145.3	101	29.02	4	4	4.922	9
WT + ADP vs. KO + ADP + PSB	246.3	297.5	-51.25	29.02	4	4	2.497	9
KO + ADP vs. KO + ADP + PSB	145.3	297.5	-152.3	29.02	4	4	7.419	9

## Sheet: Figure 7 Supp 1
	WT			KO			WT + 10 uM ADP			KO + 10 uM ADP
Time (hours)	Mean	SEM	N	Mean	SEM	N	Mean	SEM	N	Mean	SEM	N
0	2.84641	0.285756	2	3.19485	0.131154	2	3.46845	0.317731	2	5.12974	1.11526	2
0.7	4.53516	0.32357	2	5.44469	0.337878	2	8.12697	0.488659	2	9.71992	1.07867	2
1.7	5.84646	0.0733881	2	6.12495	0.47575	2	10.7797	0.73941	2	12.9052	2.02606	2
2.7	7.96029	0.0167711	2	7.81549	0.183113	2	13.0426	1.80445	2	15.7705	1.66693	2
3.7	8.87139	0.152392	2	8.84634	0.00847292	2	15.6193	2.10183	2	19.0046	3.1326	2
4.7	9.78221	0.154965	2	10.1121	0.785515	2	16.1218	2.10177	2	20.495	2.05097	2
5.7	11.7037	0.0237236	2	12.3297	0.386019	2	20.2911	2.38457	2	24.5081	2.93959	2
6.7	15.8051	0.996413	2	15.3677	0.572885	2	22.6064	2.54493	2	26.1945	4.49541	2
7.7	12.3012	0.0981183	2	13.4373	1.30863	2	24.2334	3.35092	2	28.4185	3.7417	2
8.7	14.3887	0.135761	2	15.4399	1.78997	2	25.2316	2.79261	2	28.0121	3.50046	2
9.7	12.9999	0.198285	2	15.2025	2.24733	2	25.8632	4.85834	2	30.7541	3.85045	2
10.7	13.6493	0.254284	2	15.3613	2.14875	2	25.9878	4.19582	2	31.1541	2.08282	2
11.7	15.3788	0.0838161	2	15.0536	0.628993	2	29.9241	4.78398	2	31.9418	5.24541	2
12.7	16.2244	0.277244	2	15.3821	0.688843	2	27.7424	1.57598	2	32.2485	2.64262	2
13.7	16.873	0.430776	2	15.7689	1.21049	2	27.7939	2.2983	2	31.8228	1.4918	2
14.7	17.2728	0.175172	2	15.9916	1.2206	2	28.161	4.29347	2	33.9247	1.42608	2
15.7	15.6537	0.123507	2	16.6223	1.86854	2	27.7597	3.81803	2	32.0757	3.05213	2
16.7	16.6611	0.418279	2	15.5	0.959944	2	30.2937	3.26433	2	32.5873	4.55145	2
17.7	18.1078	1.0435	2	16.8871	0.76153	2	30.5429	3.2508	2	32.7649	4.07255	2
18.7	16.4714	1.29997	2	16.527	0.767944	2	29.7906	3.3494	2	33.2743	4.53341	2
19.7	17.9835	1.19109	2	18.0656	0.104703	2	29.3319	3.76095	2	30.7715	5.15082	2
20.7	16.9355	1.70552	2	16.7793	0.105979	2	29.2728	3.353	2	31.989	4.46807	2
21.7	17.2247	0.767302	2	16.7473	0.450189	2	28.8431	3.60109	2	30.6972	5.41028	2
22.7	16.1586	1.27885	2	16.5817	0.192979	2	29.3638	3.94182	2	33.2177	3.5314	2
23.7	15.4802	0.041338	2	16.2965	1.30603	2	29.5247	3.40905	2	33.8622	4.07154	2
24	16.2204	1.24696	2	16.1961	0.582106	2	28.915	3.46034	2	33.3045	3.95175	2
24.7	14.9916	0.460341	2	15.3816	0.372597	2	28.7739	2.8523	2	32.7398	4.49449	2
25.7	16.8705	1.53923	2	16.3933	0.37	2	30.347	3.24161	2	34.1086	4.45462	2
26.7	15.5213	0.84743	2	15.1612	0.148177	2	29.9882	3.49132	2	32.7579	4.87679	2
27.7	17.5825	1.22185	2	16.6206	0.691081	2	29.2299	2.76688	2	32.8964	4.60982	2
