# Supplementary material for: TREM2 regulates purinergic receptor-mediated calcium signaling and motility in human iPSC-derived microglia
Source: eLife journal article supplement (doi:10.7554/elife.73021), 2022-02-22

## Figure 5-figure supplement 2

## 1 mM Calcium 2.5 $\mu$ M ADP Process Extension

### 0 mM Calcium 2.5 $\mu$ M ADP Process Extension

# A

## Number Branches

# B

## Process Length

C

## Number Branches

# D

## Process Length

## Raw Data

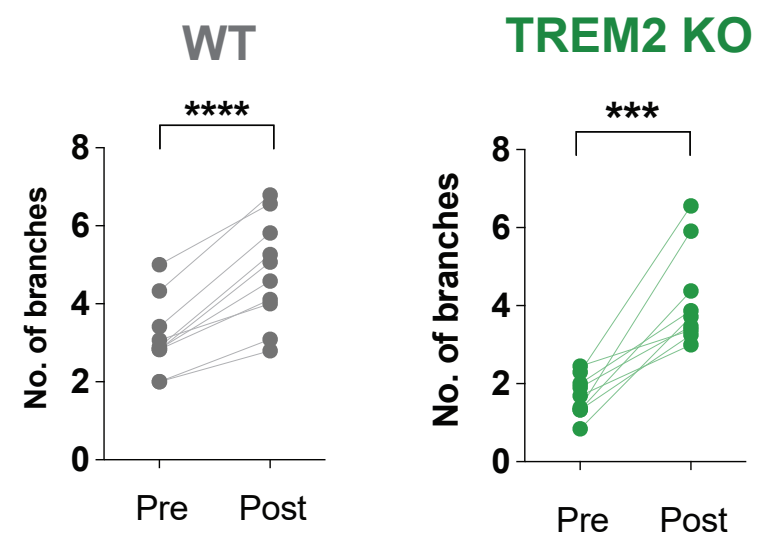

**Fold change  
from baseline**

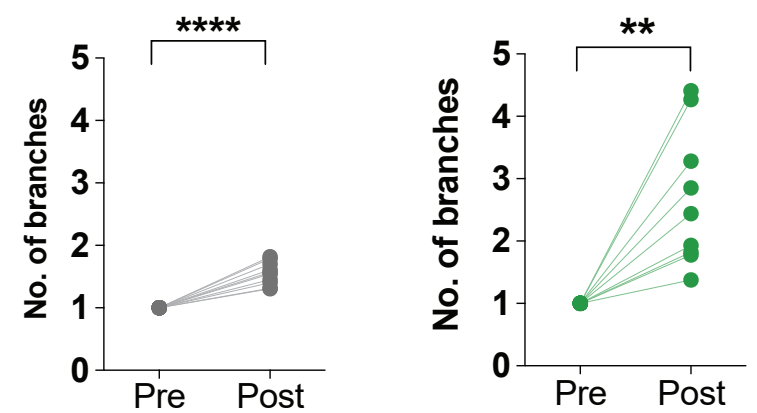

**No. of branches after ADP  
(Fold change from baseline)**

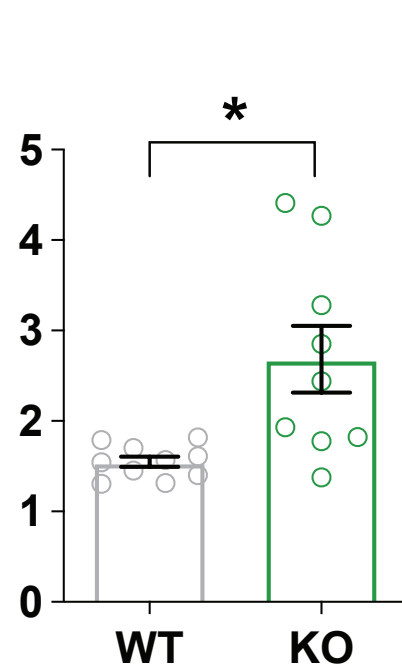

**Process length after ADP  
(Fold change from baseline)**

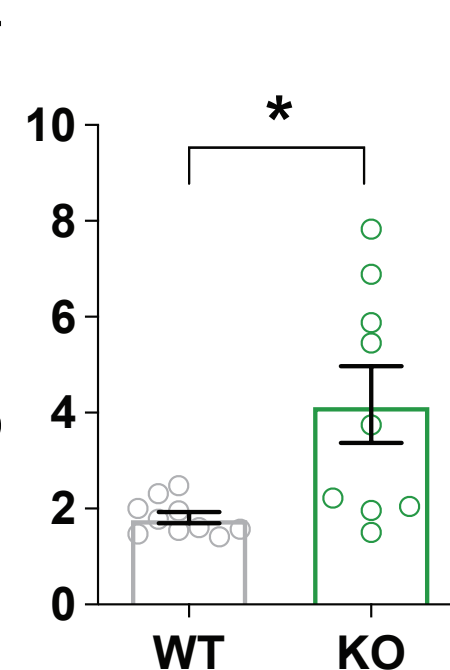

**No. of branches after ADP  
(Fold change from baseline)**

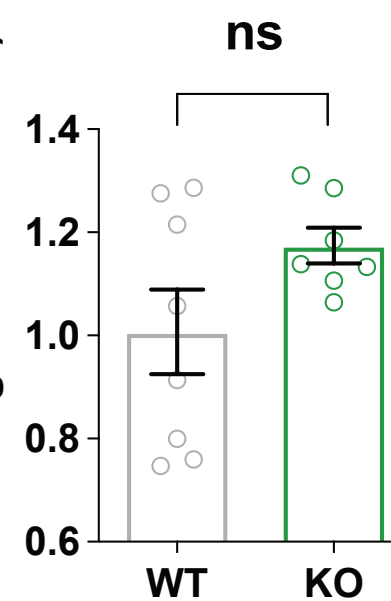

**Process length after ADP  
(Fold change from baseline)**

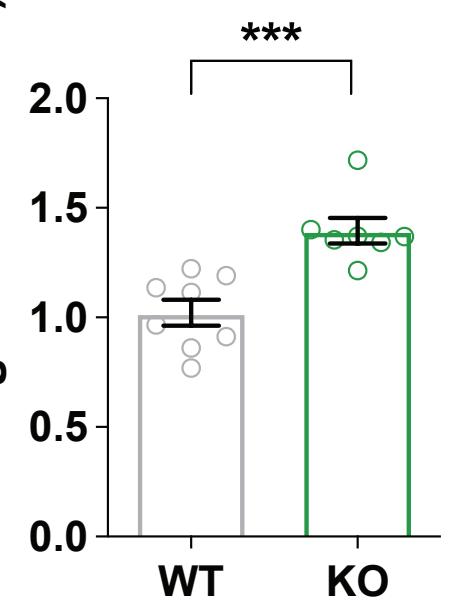

Supplement: supp [file elife-73021-supp-v1.zip]
