# Supplementary material for: TREM2 regulates purinergic receptor-mediated calcium signaling and motility in human iPSC-derived microglia
Source: eLife journal article supplement (doi:10.7554/elife.73021), 2022-02-22

Figure 5-figure supplement 1

**A**

1 mM Calcium 0 uM ADP Baseline Motility

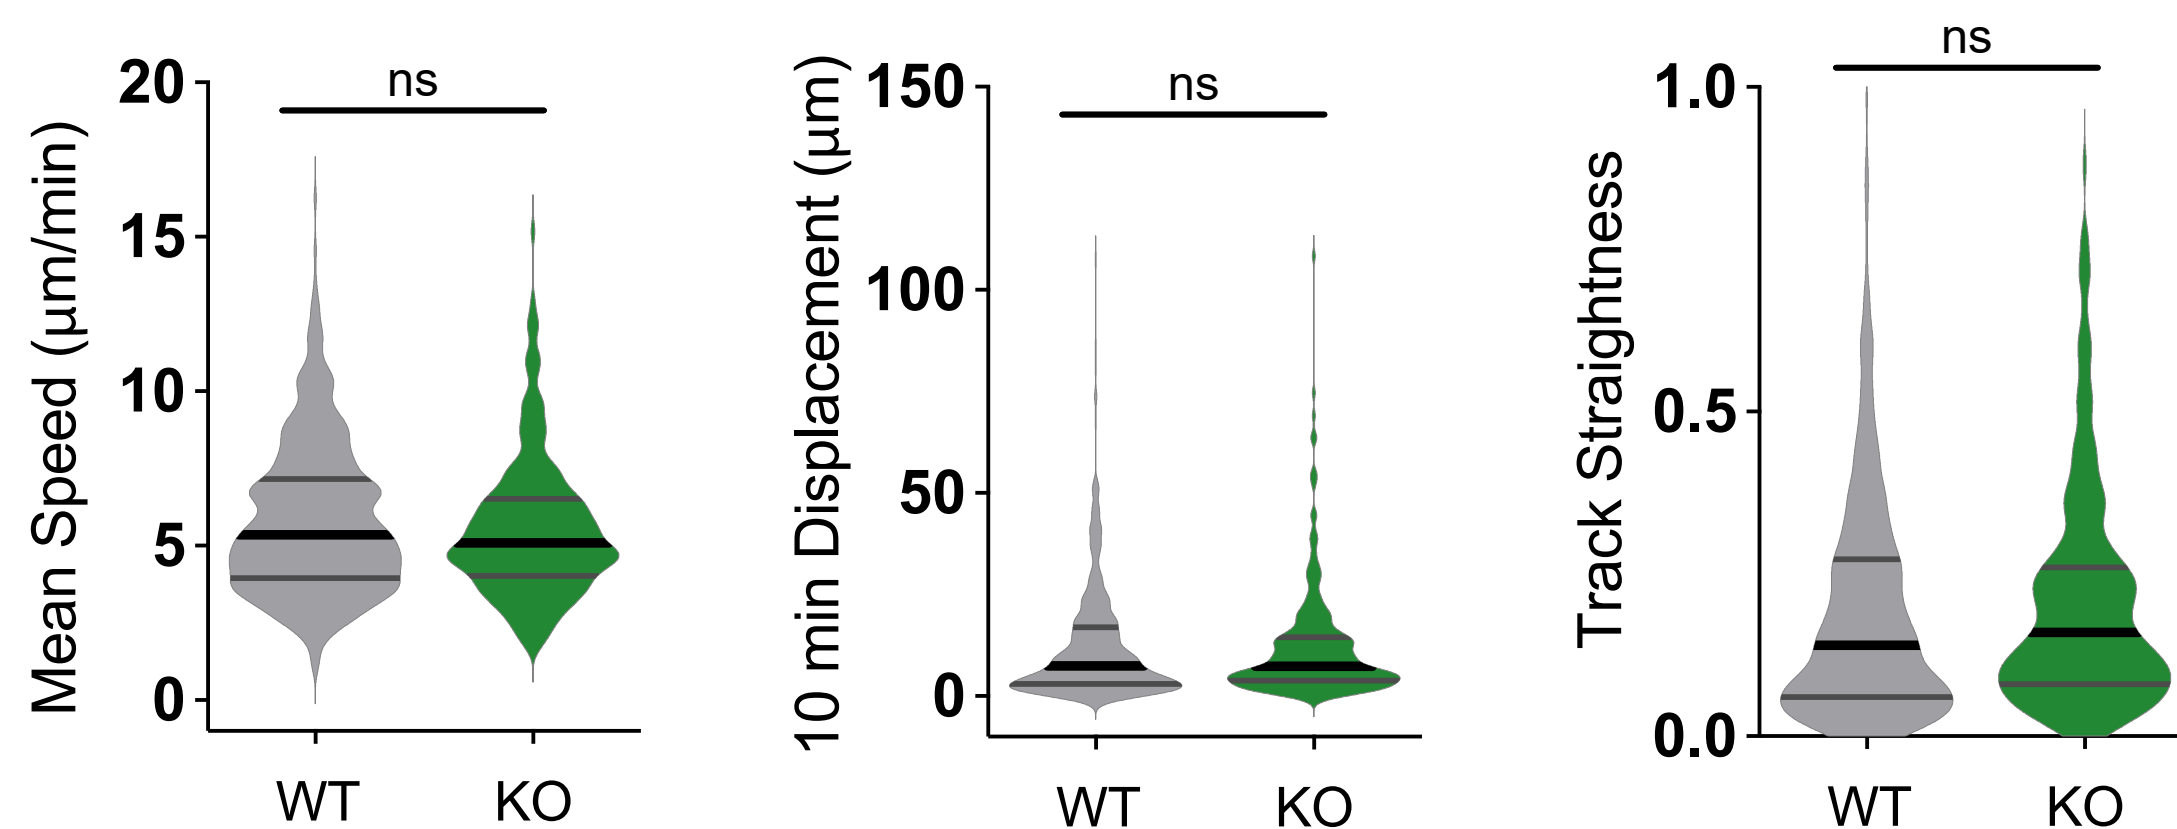

**B**

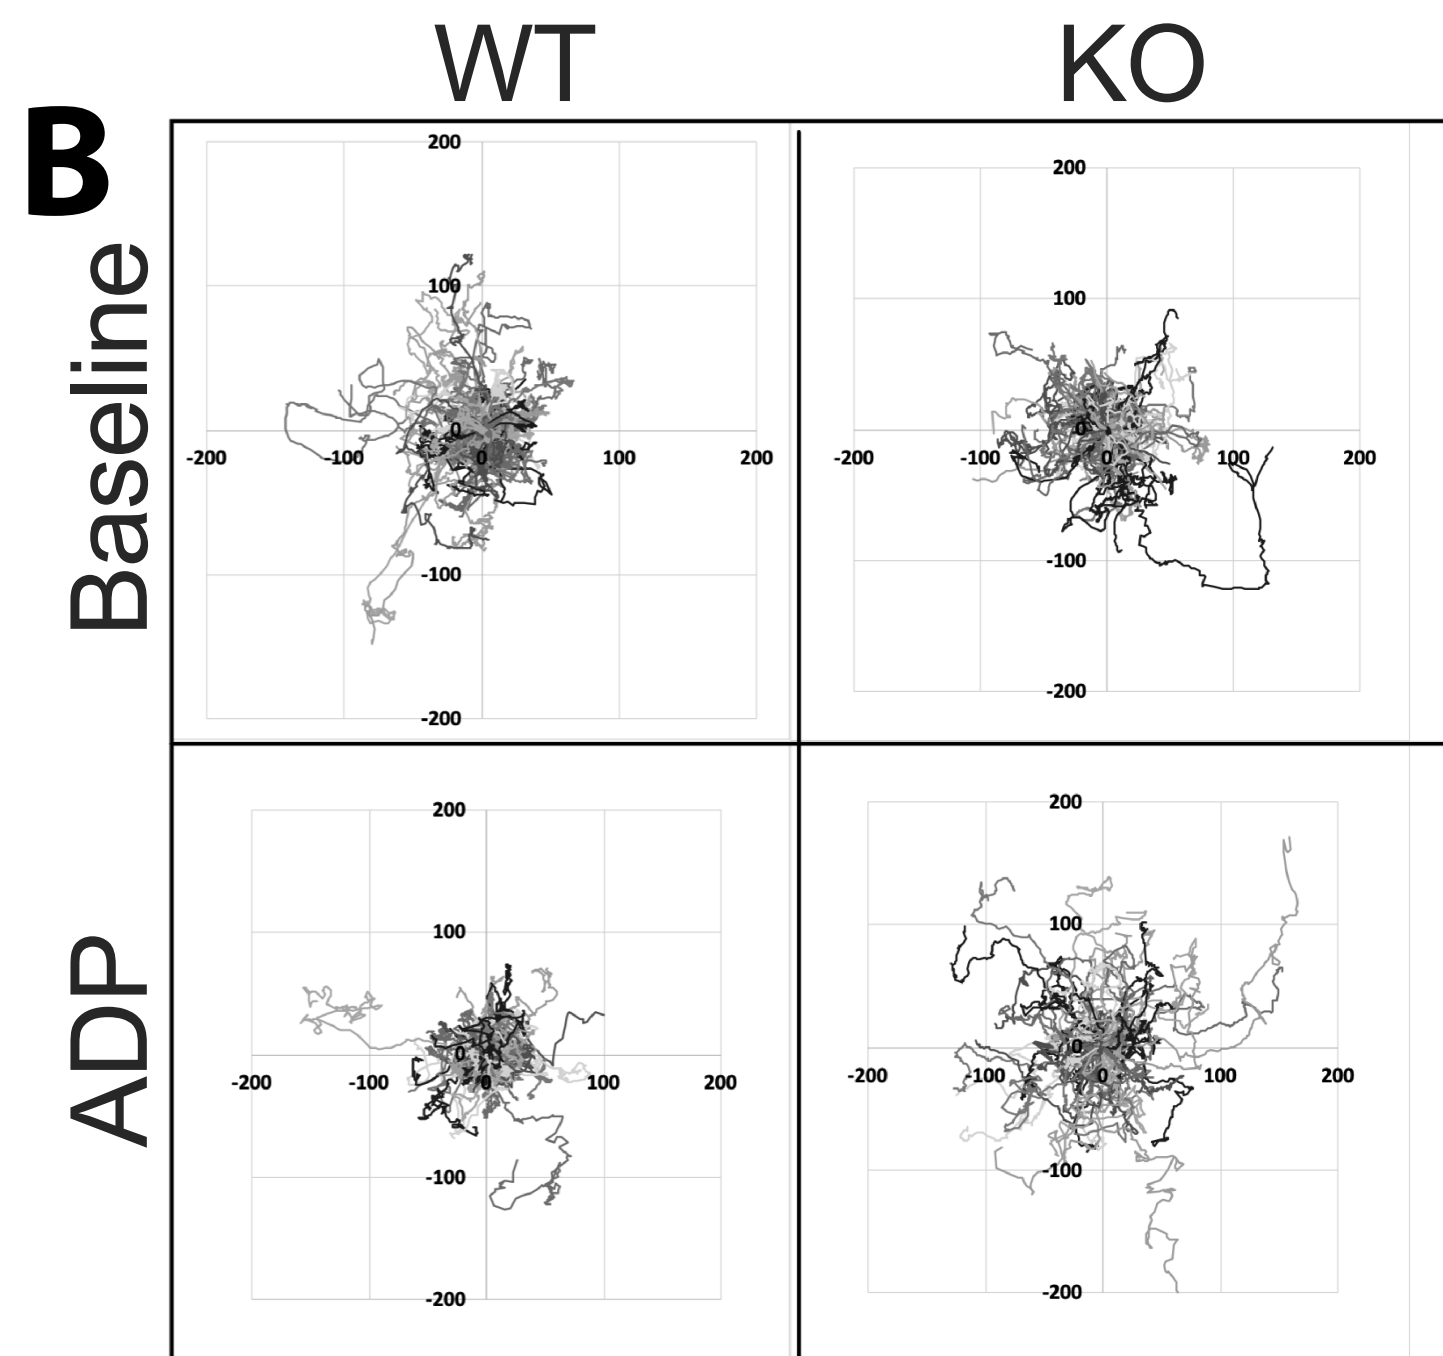

**C**

Directional Autocorrelation

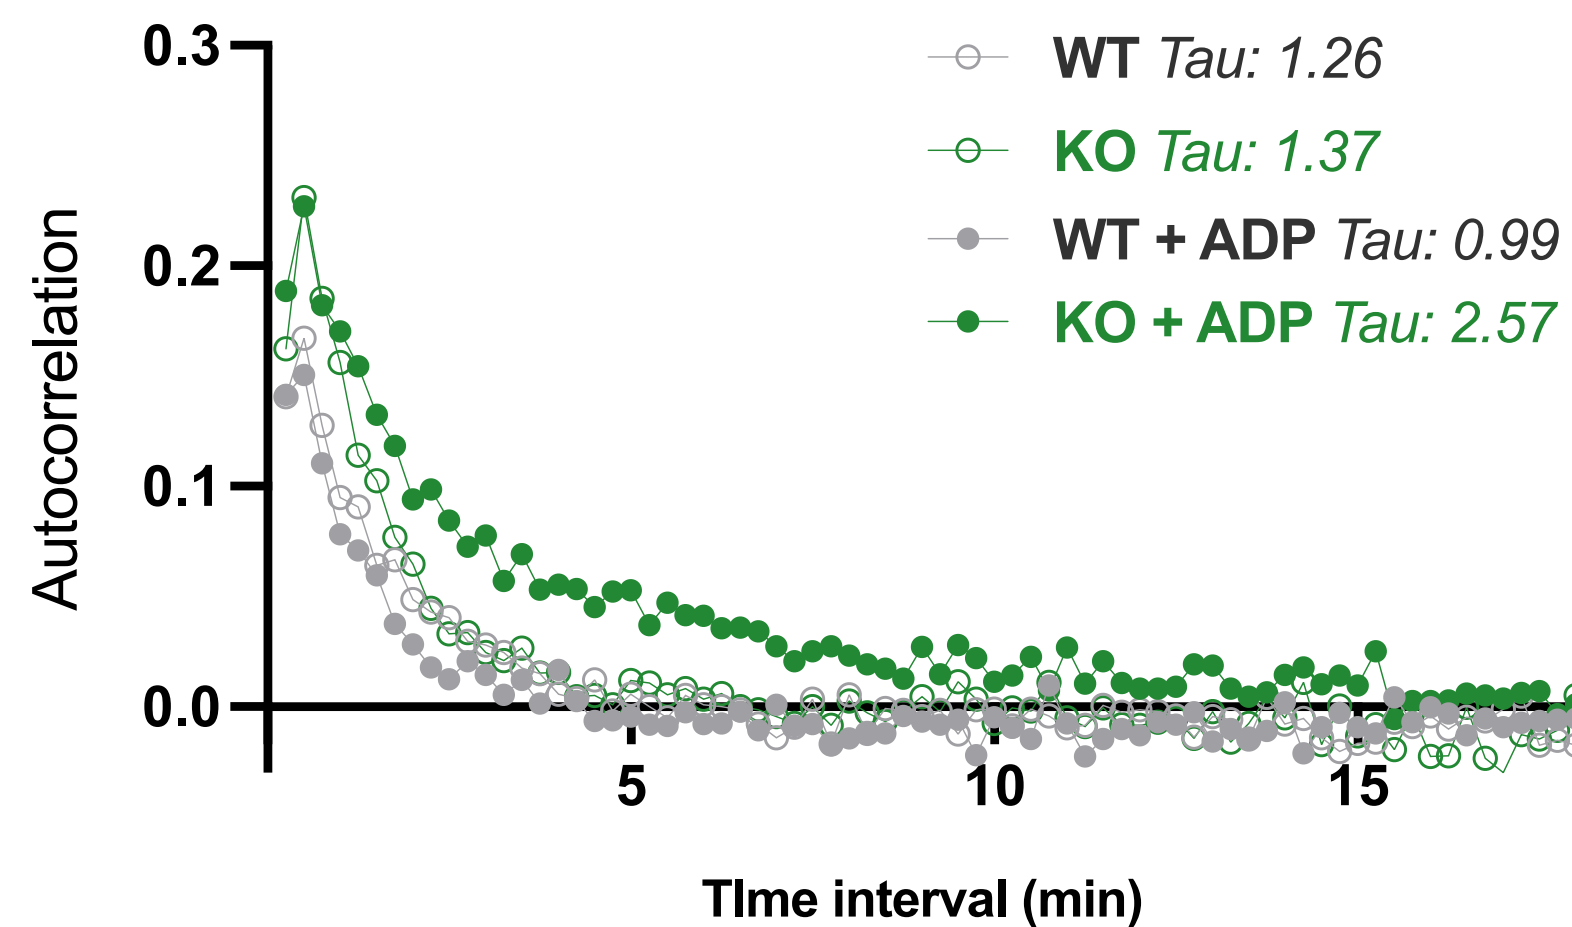

**D**

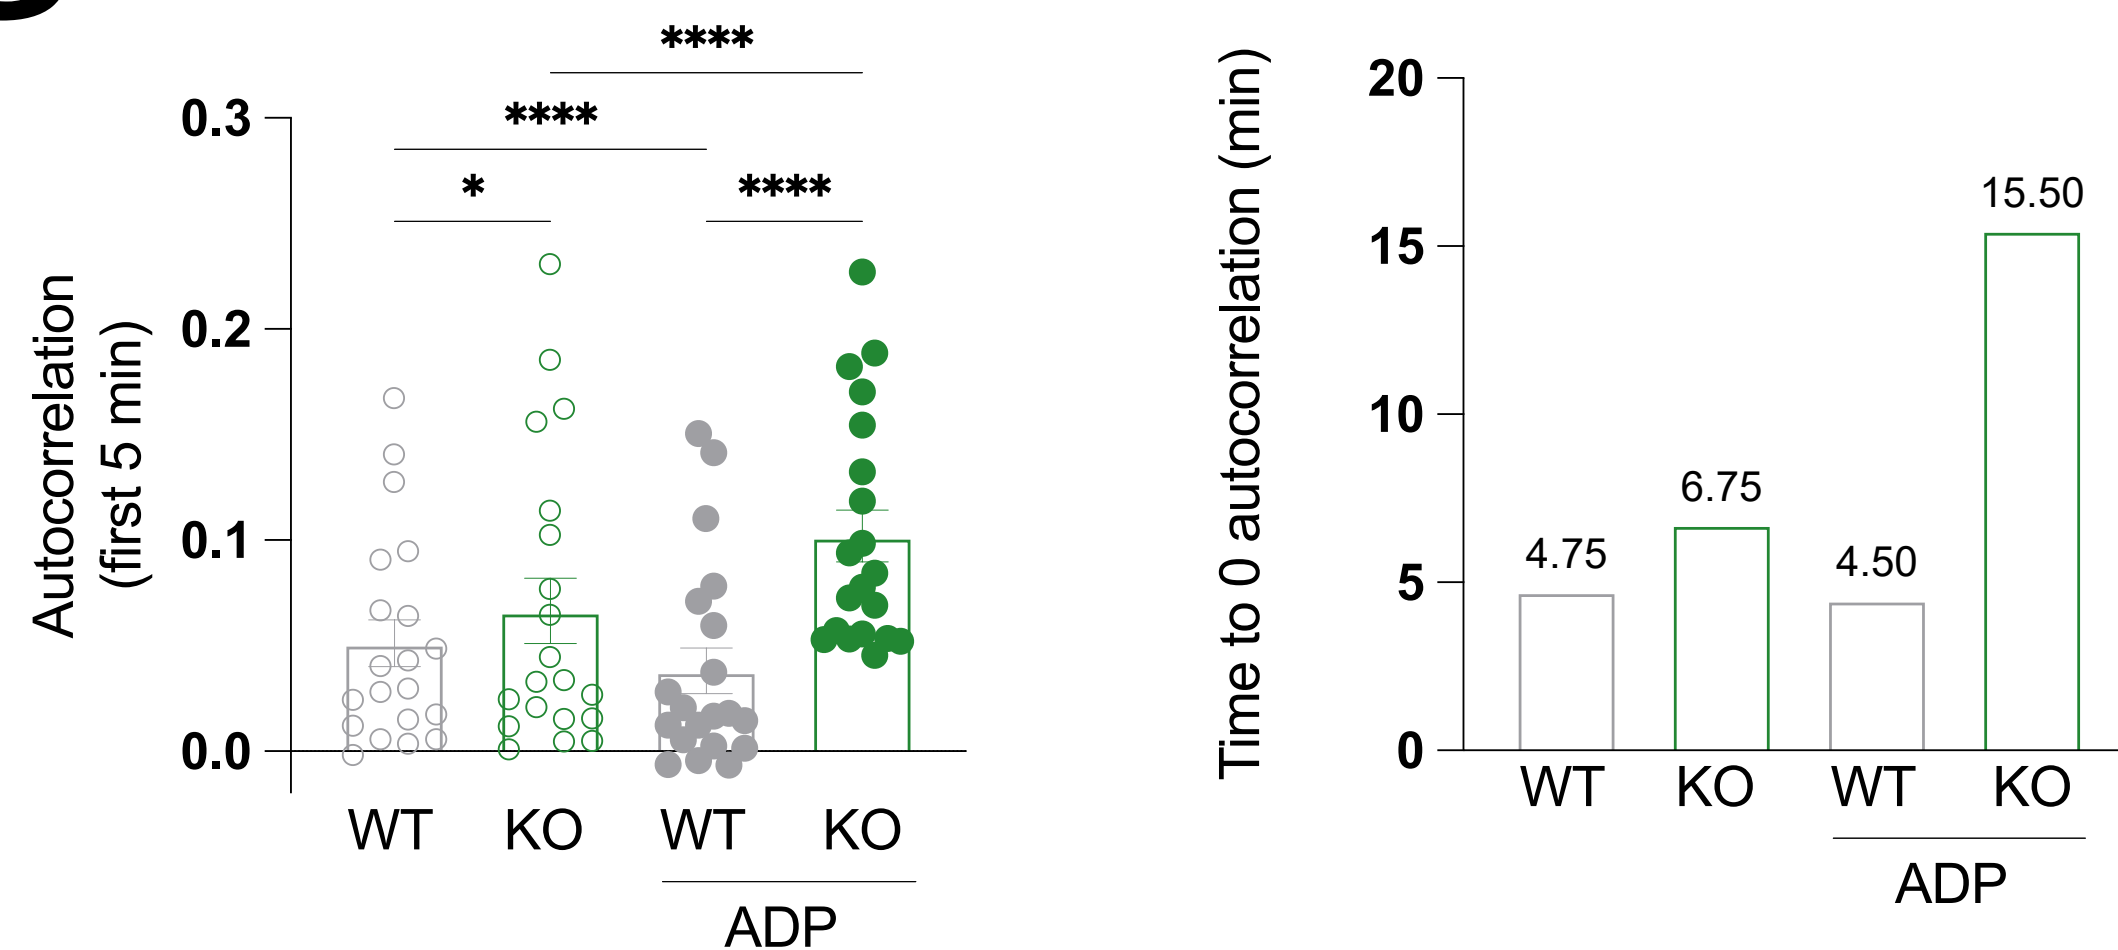

Supplement: supp [file elife-73021-supp-v1.zip]
