# Supplementary material for: TREM2 regulates purinergic receptor-mediated calcium signaling and motility in human iPSC-derived microglia
Source: eLife journal article supplement (doi:10.7554/elife.73021), 2022-02-22

Figure 6-figure supplement 1

A

Calcium and Displacement with ADP

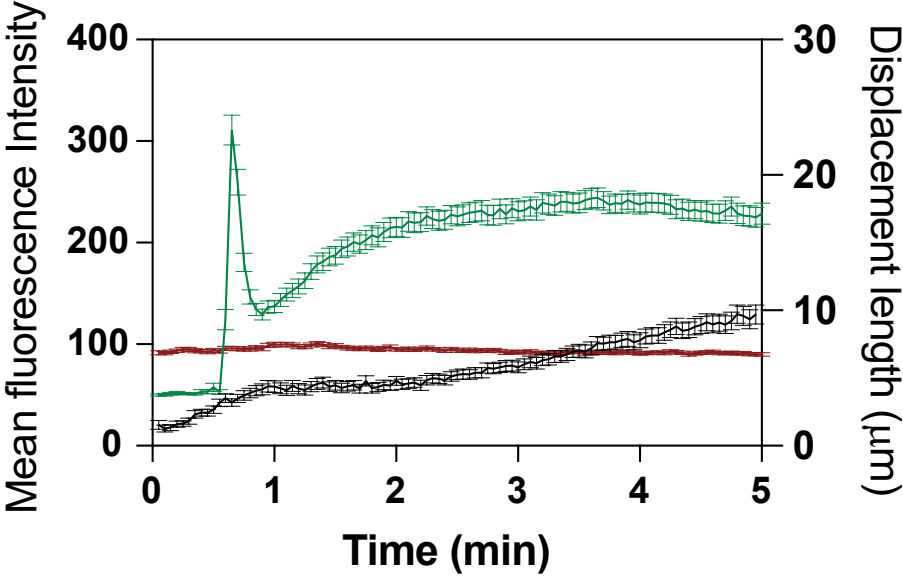

B

Calcium and Displacement post-ADP

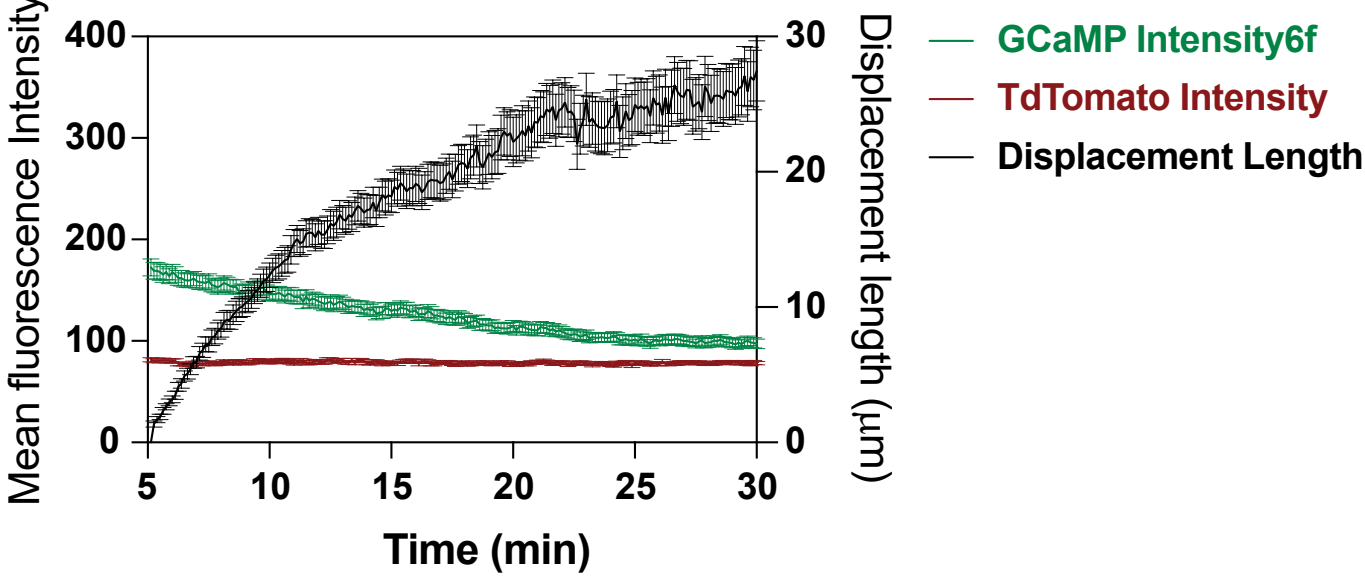

Supplement: supp [file elife-73021-supp-v1.zip]
