# Supplementary figures and images for: TREM2 regulates purinergic receptor-mediated calcium signaling and motility in human iPSC-derived microglia
Source: eLife journal article supplement (doi:10.7554/elife.73021), 2022-02-22

Figure 3-figure supplement 2

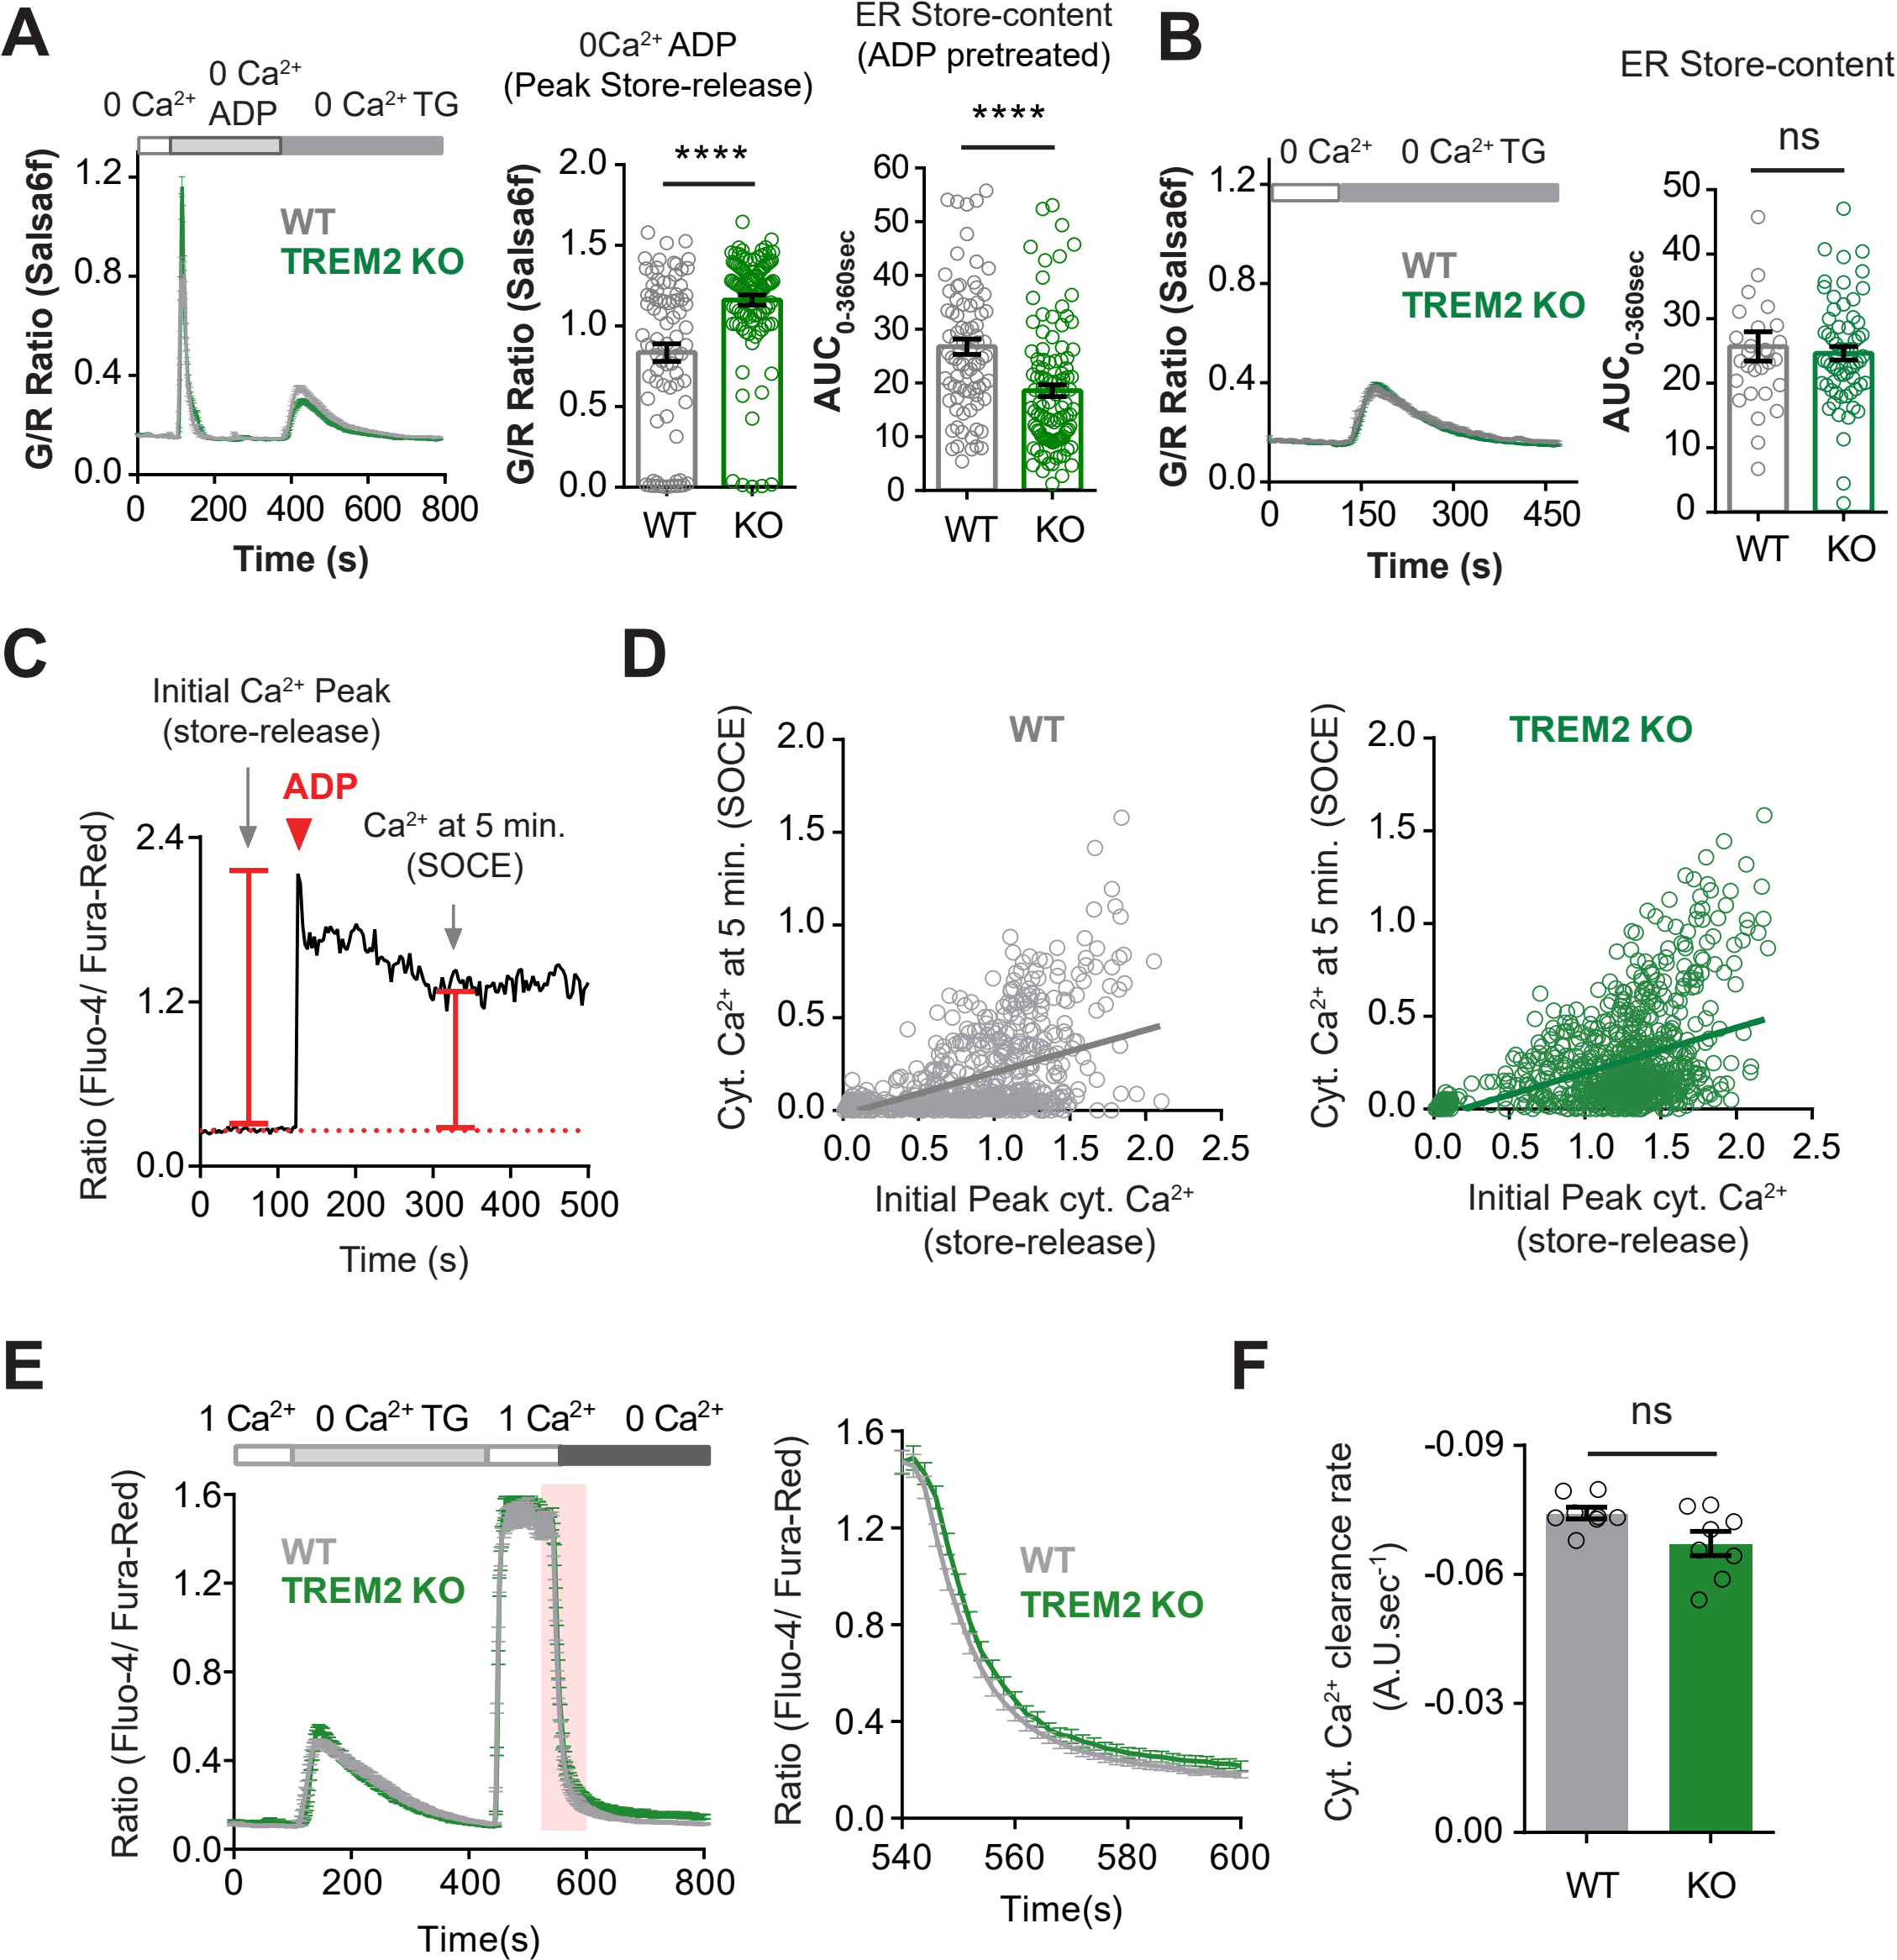

Supplement: supp [file elife-73021-supp-v1.zip]

Figure 7-figure supplement 1

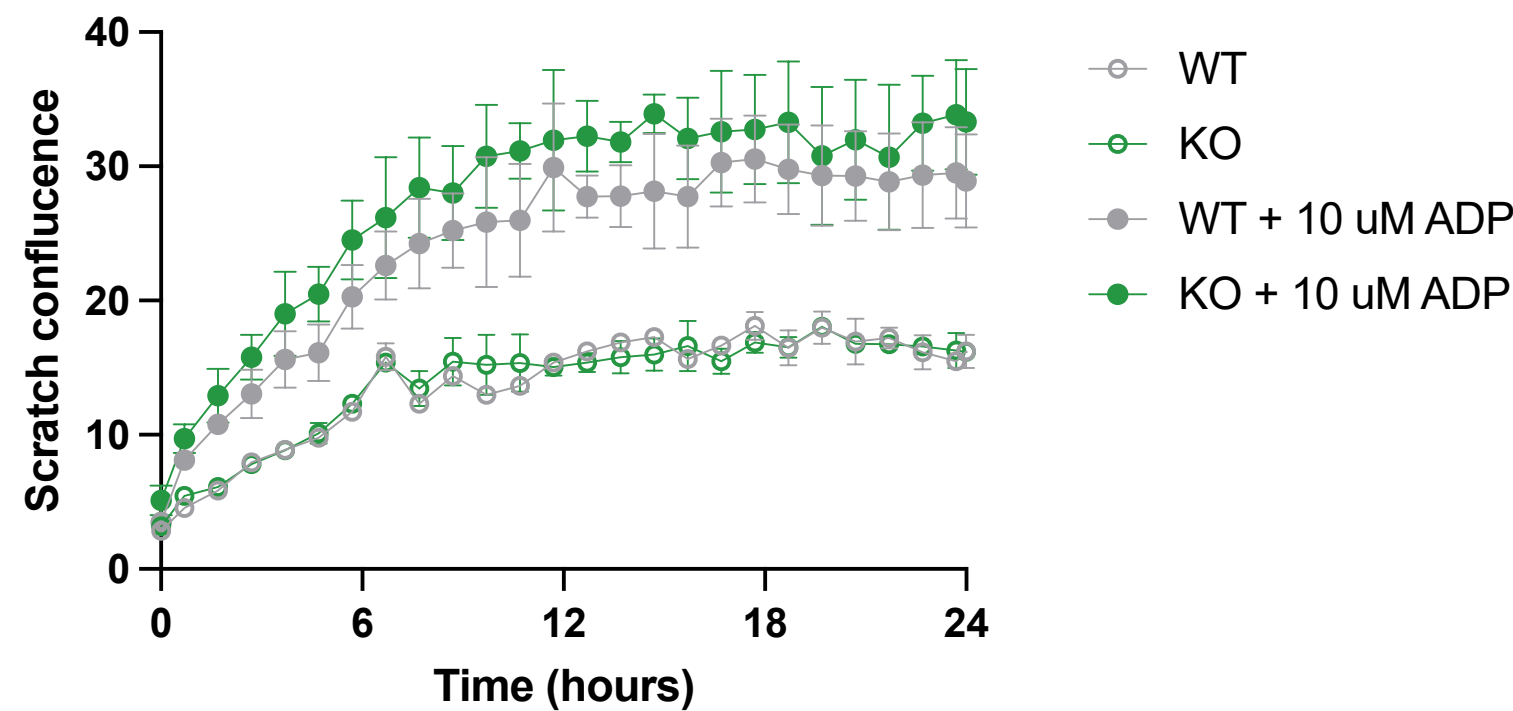

Supplement: supp [file elife-73021-supp-v1.zip]

Figure 6-figure supplement 2

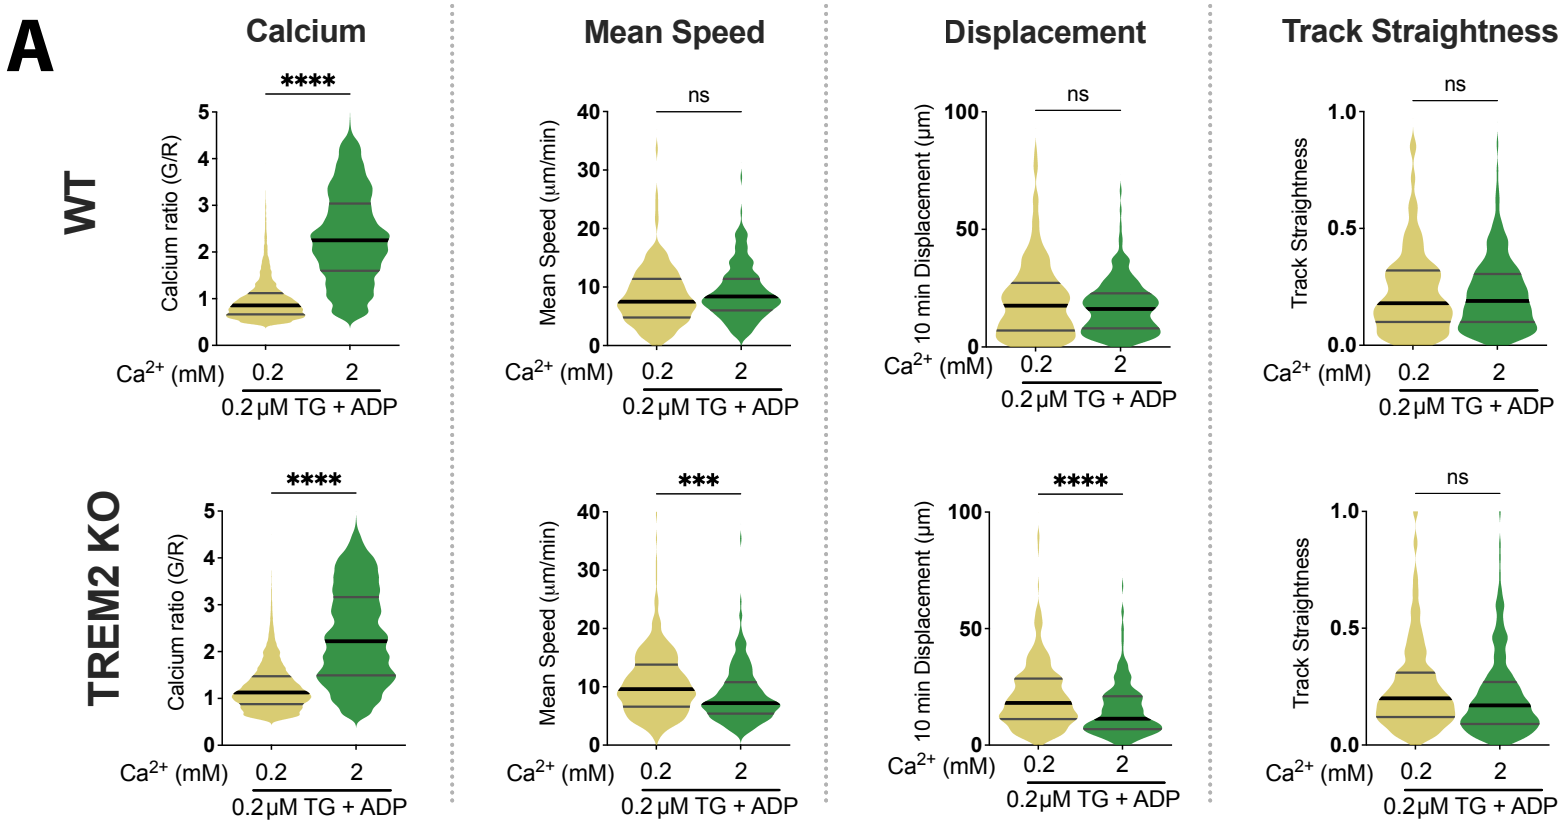

0.2 mM Calcium 0.2  $\mu$ M Thapsigargin Displacement

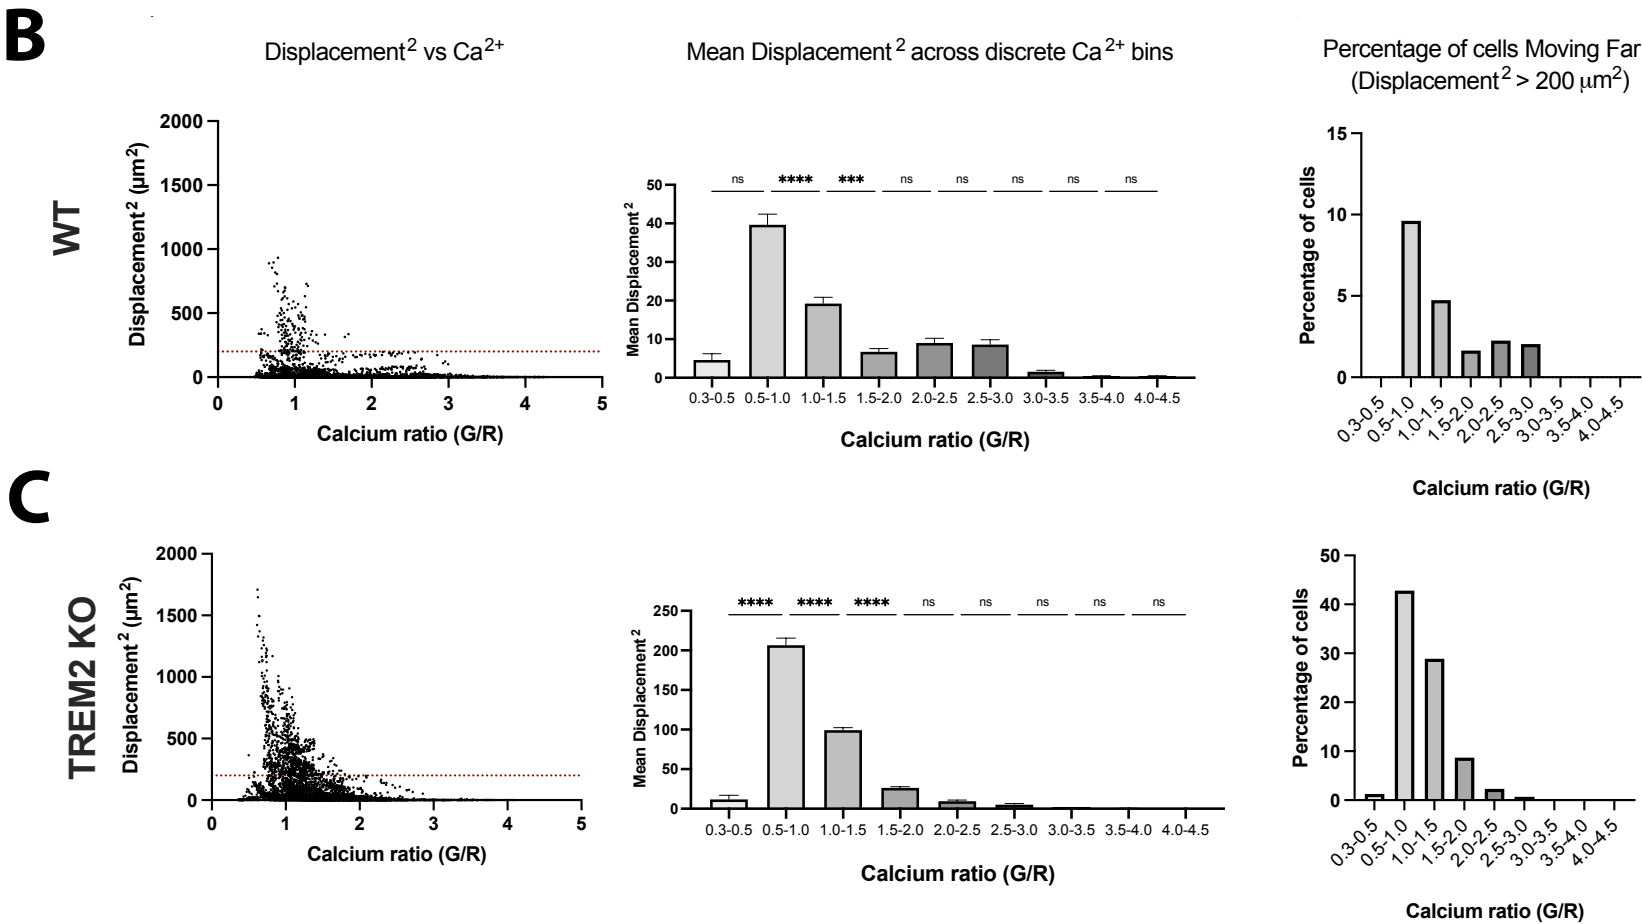

Supplement: supp [file elife-73021-supp-v1.zip]

Figure 4- figure supplement 1

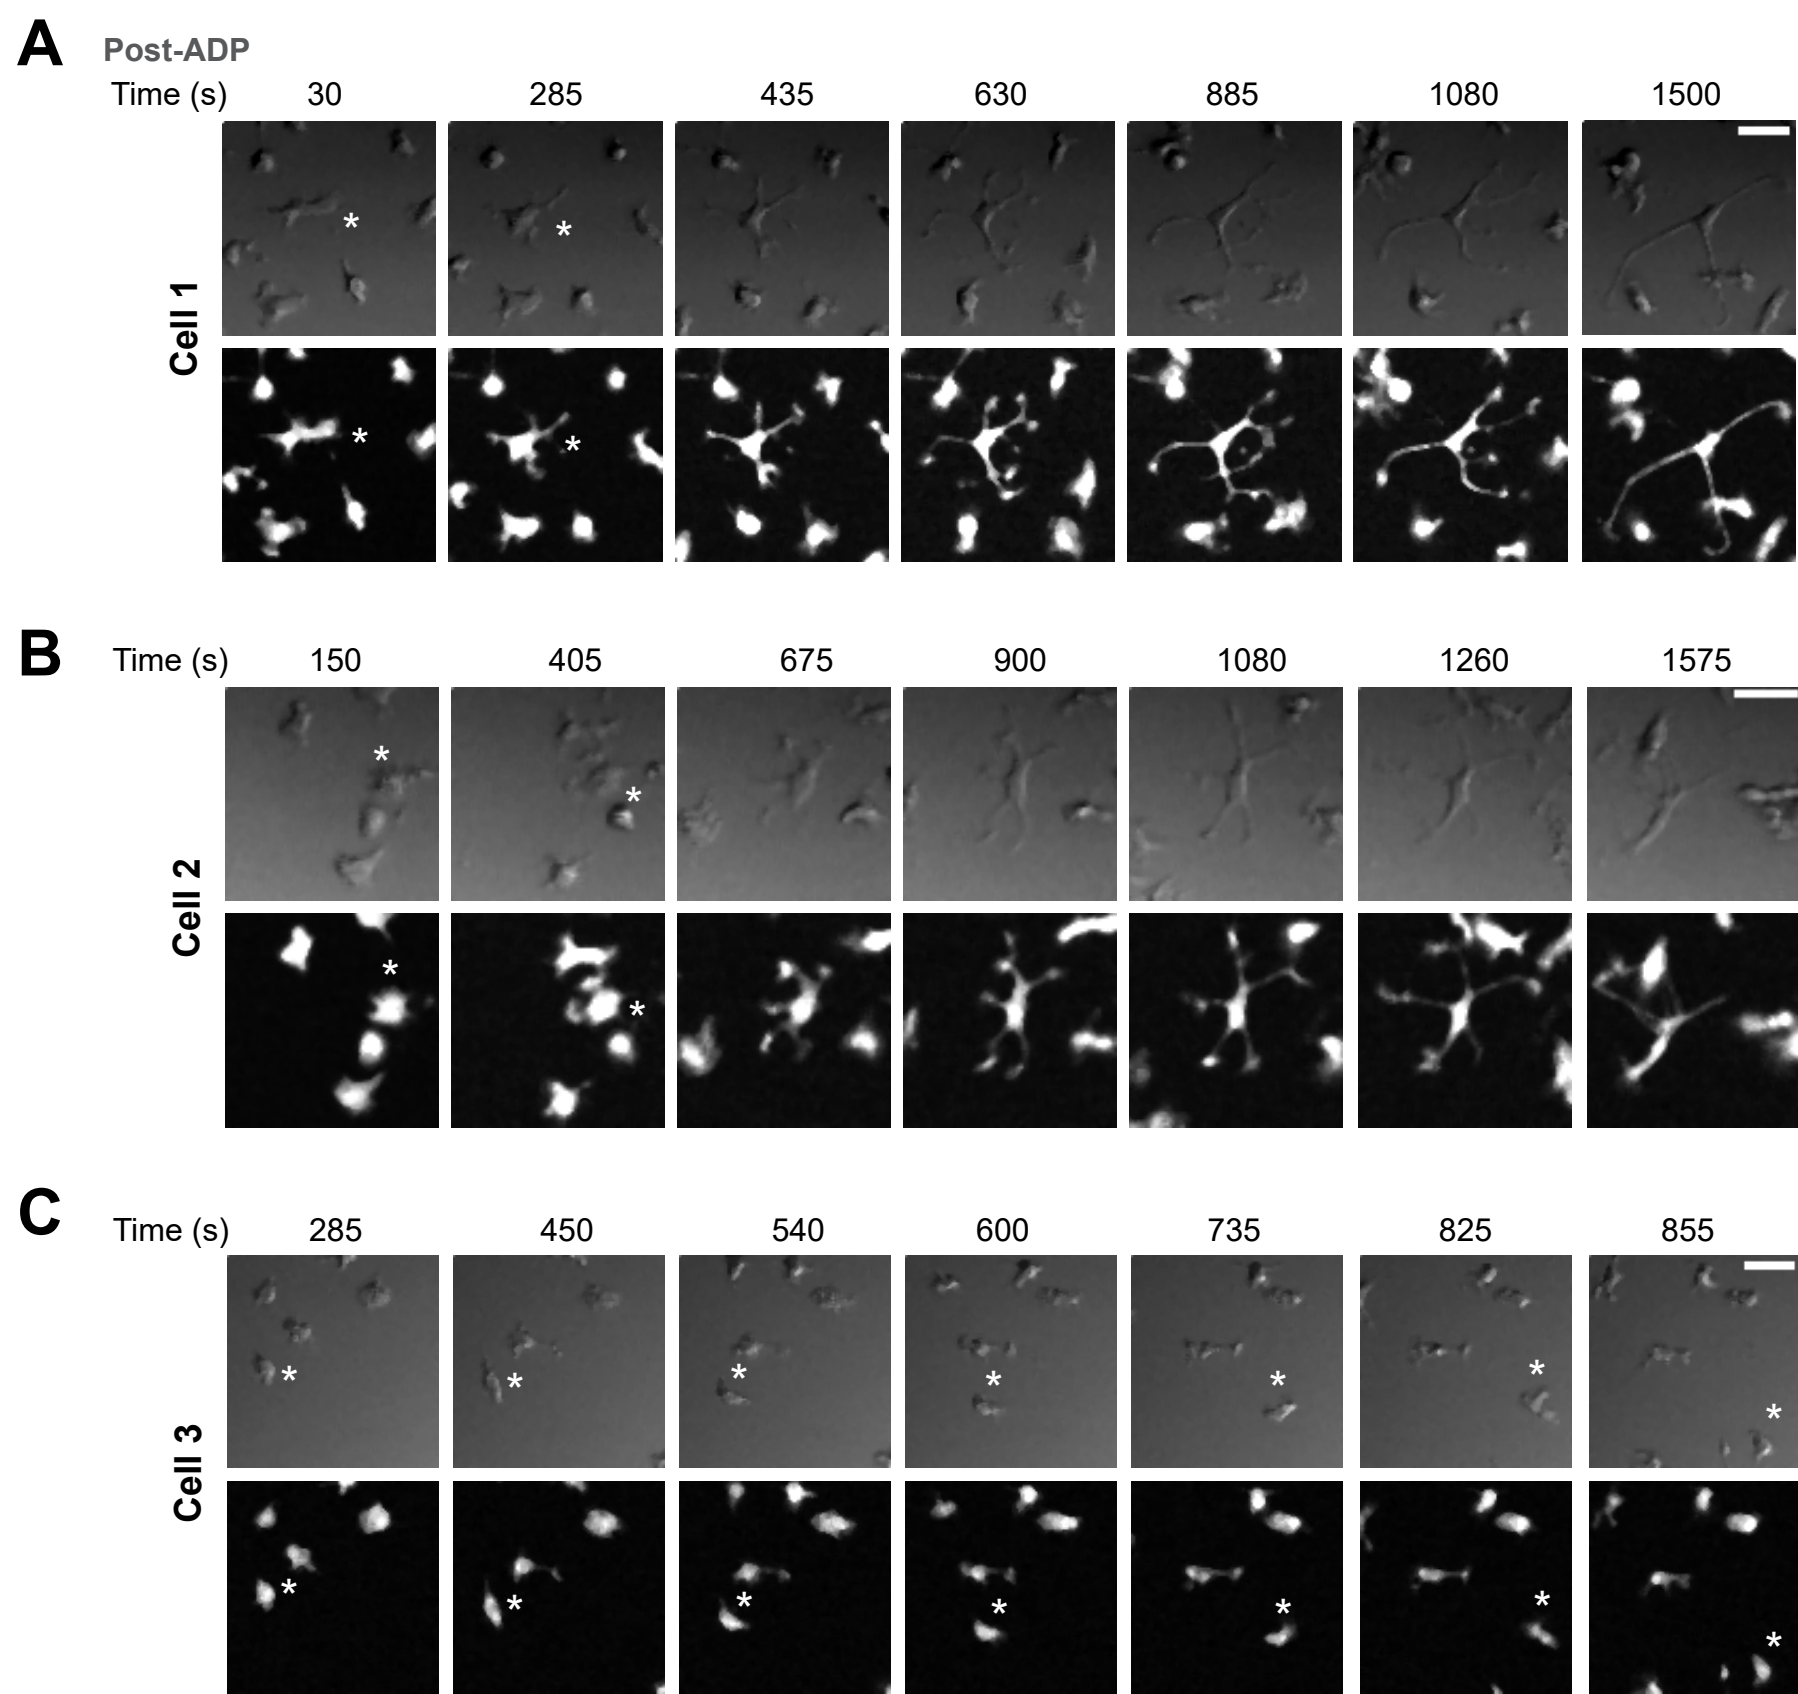

Supplement: supp [file elife-73021-supp-v1.zip]

Figure 1-figure supplement 1

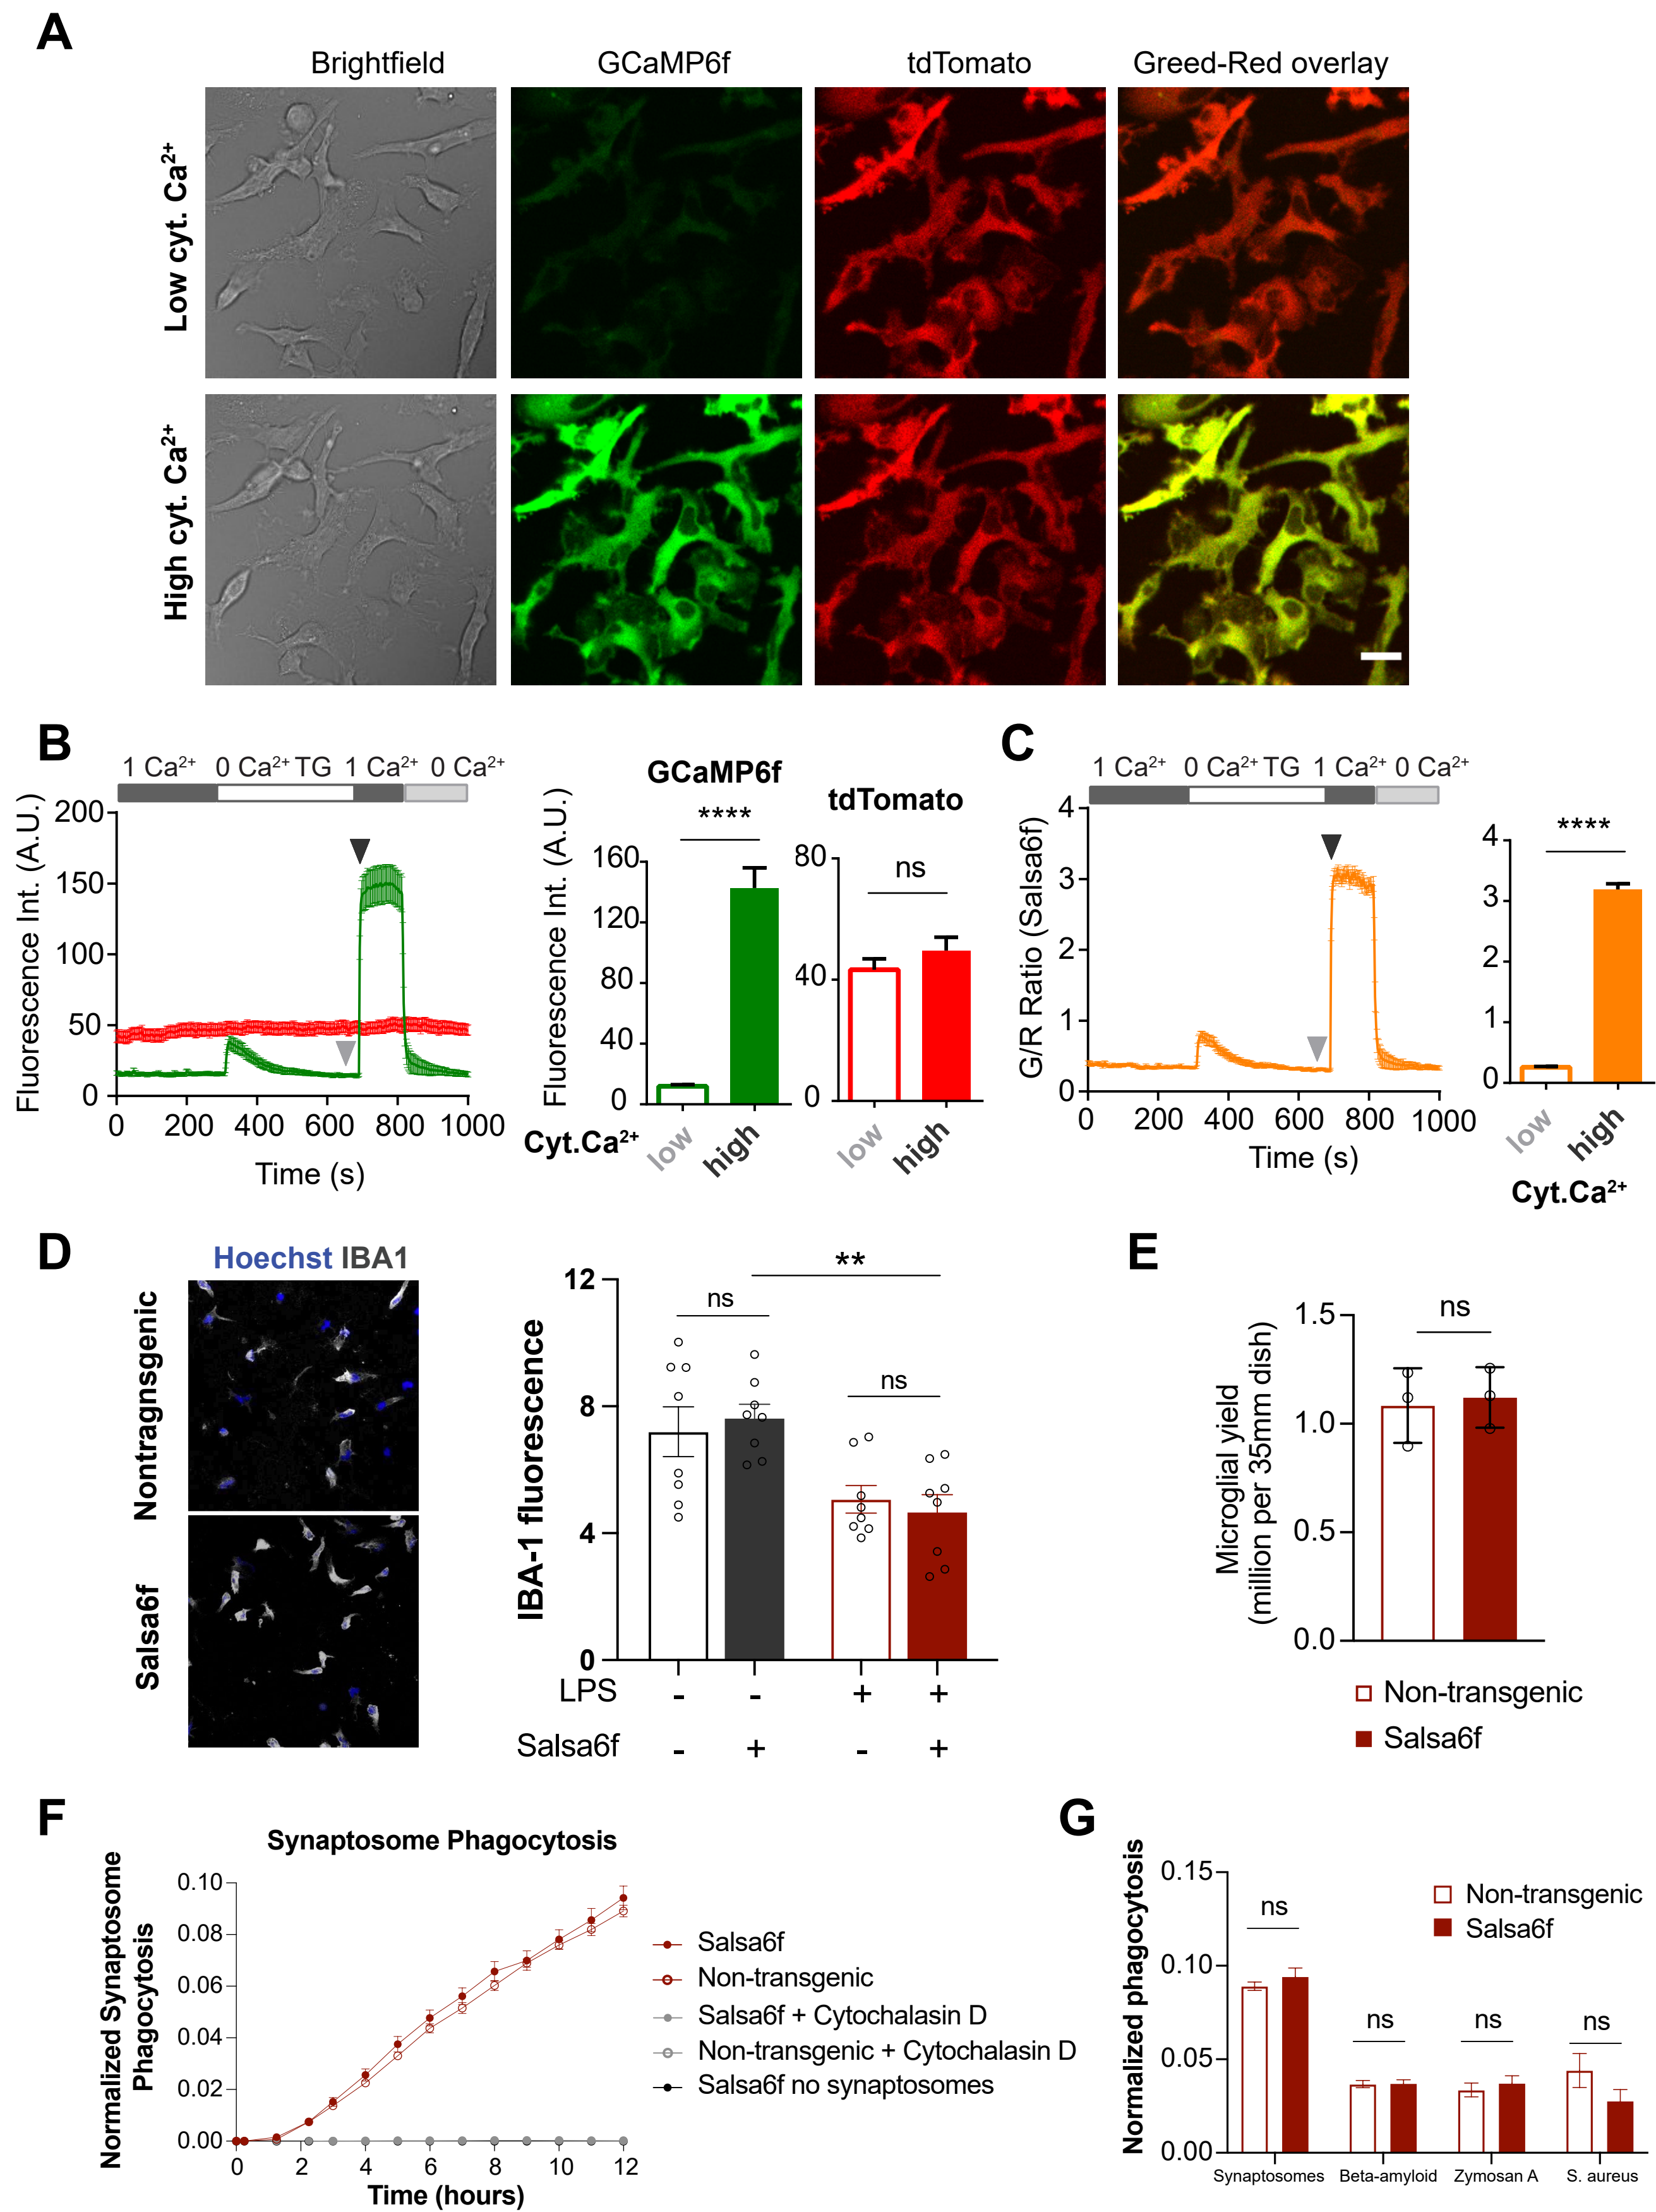

Supplement: supp [file elife-73021-supp-v1.zip]

Figure 1-figure supplement 2

A

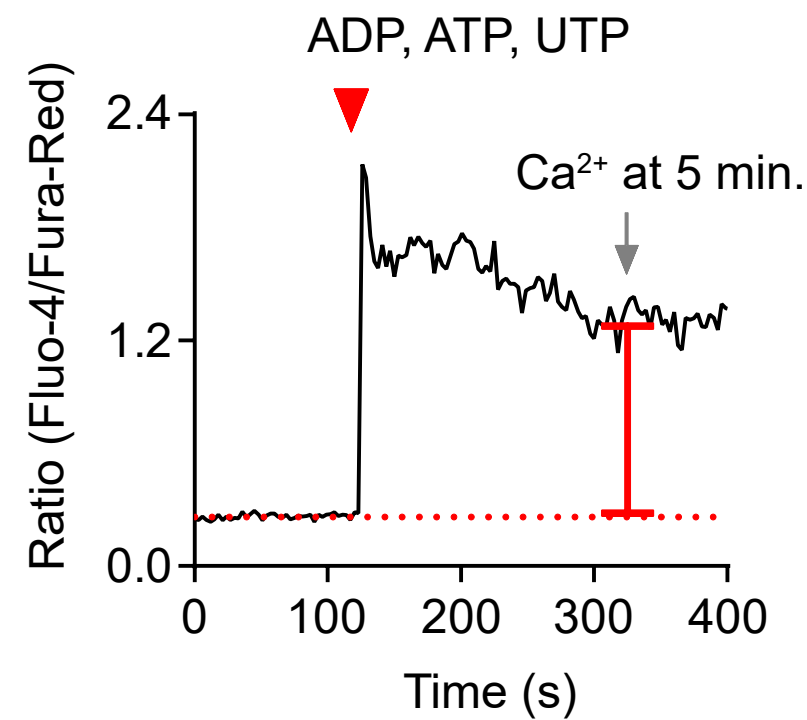

B

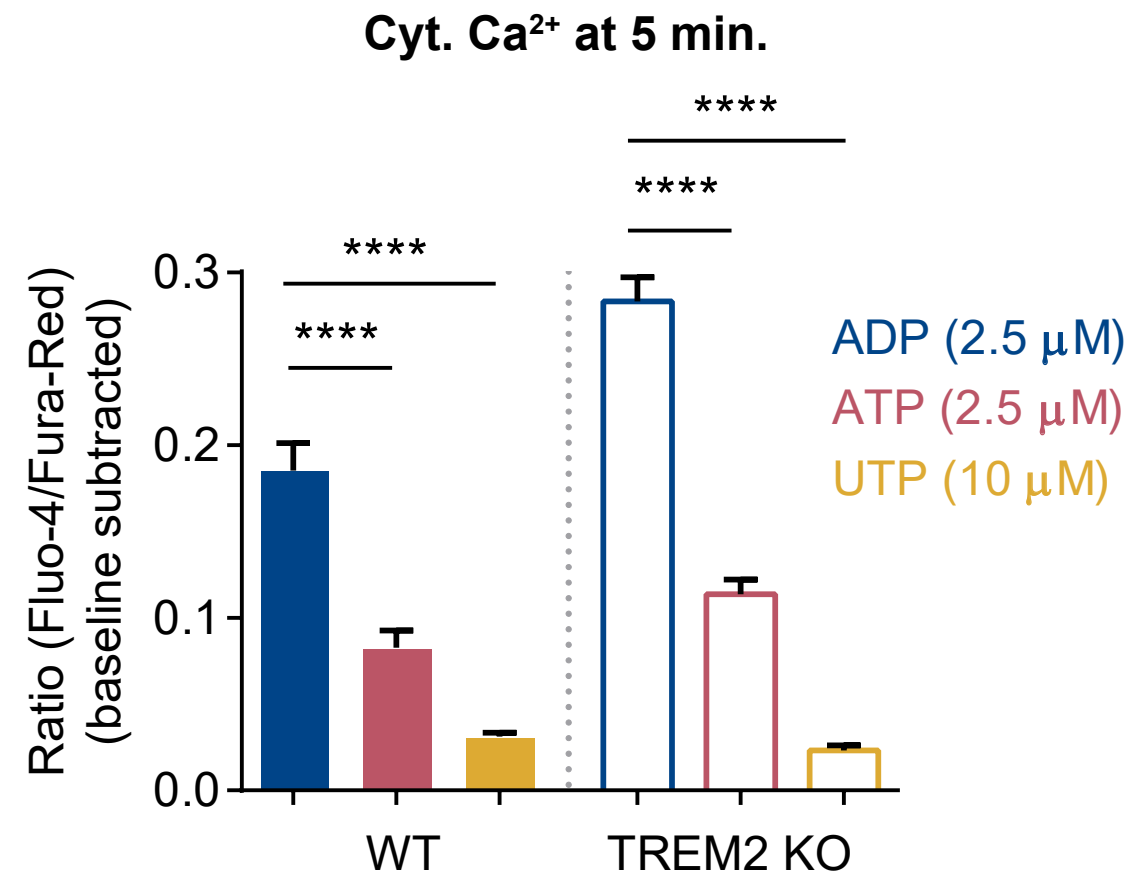

Supplement: supp [file elife-73021-supp-v1.zip]

Figure 2-figure supplement 1

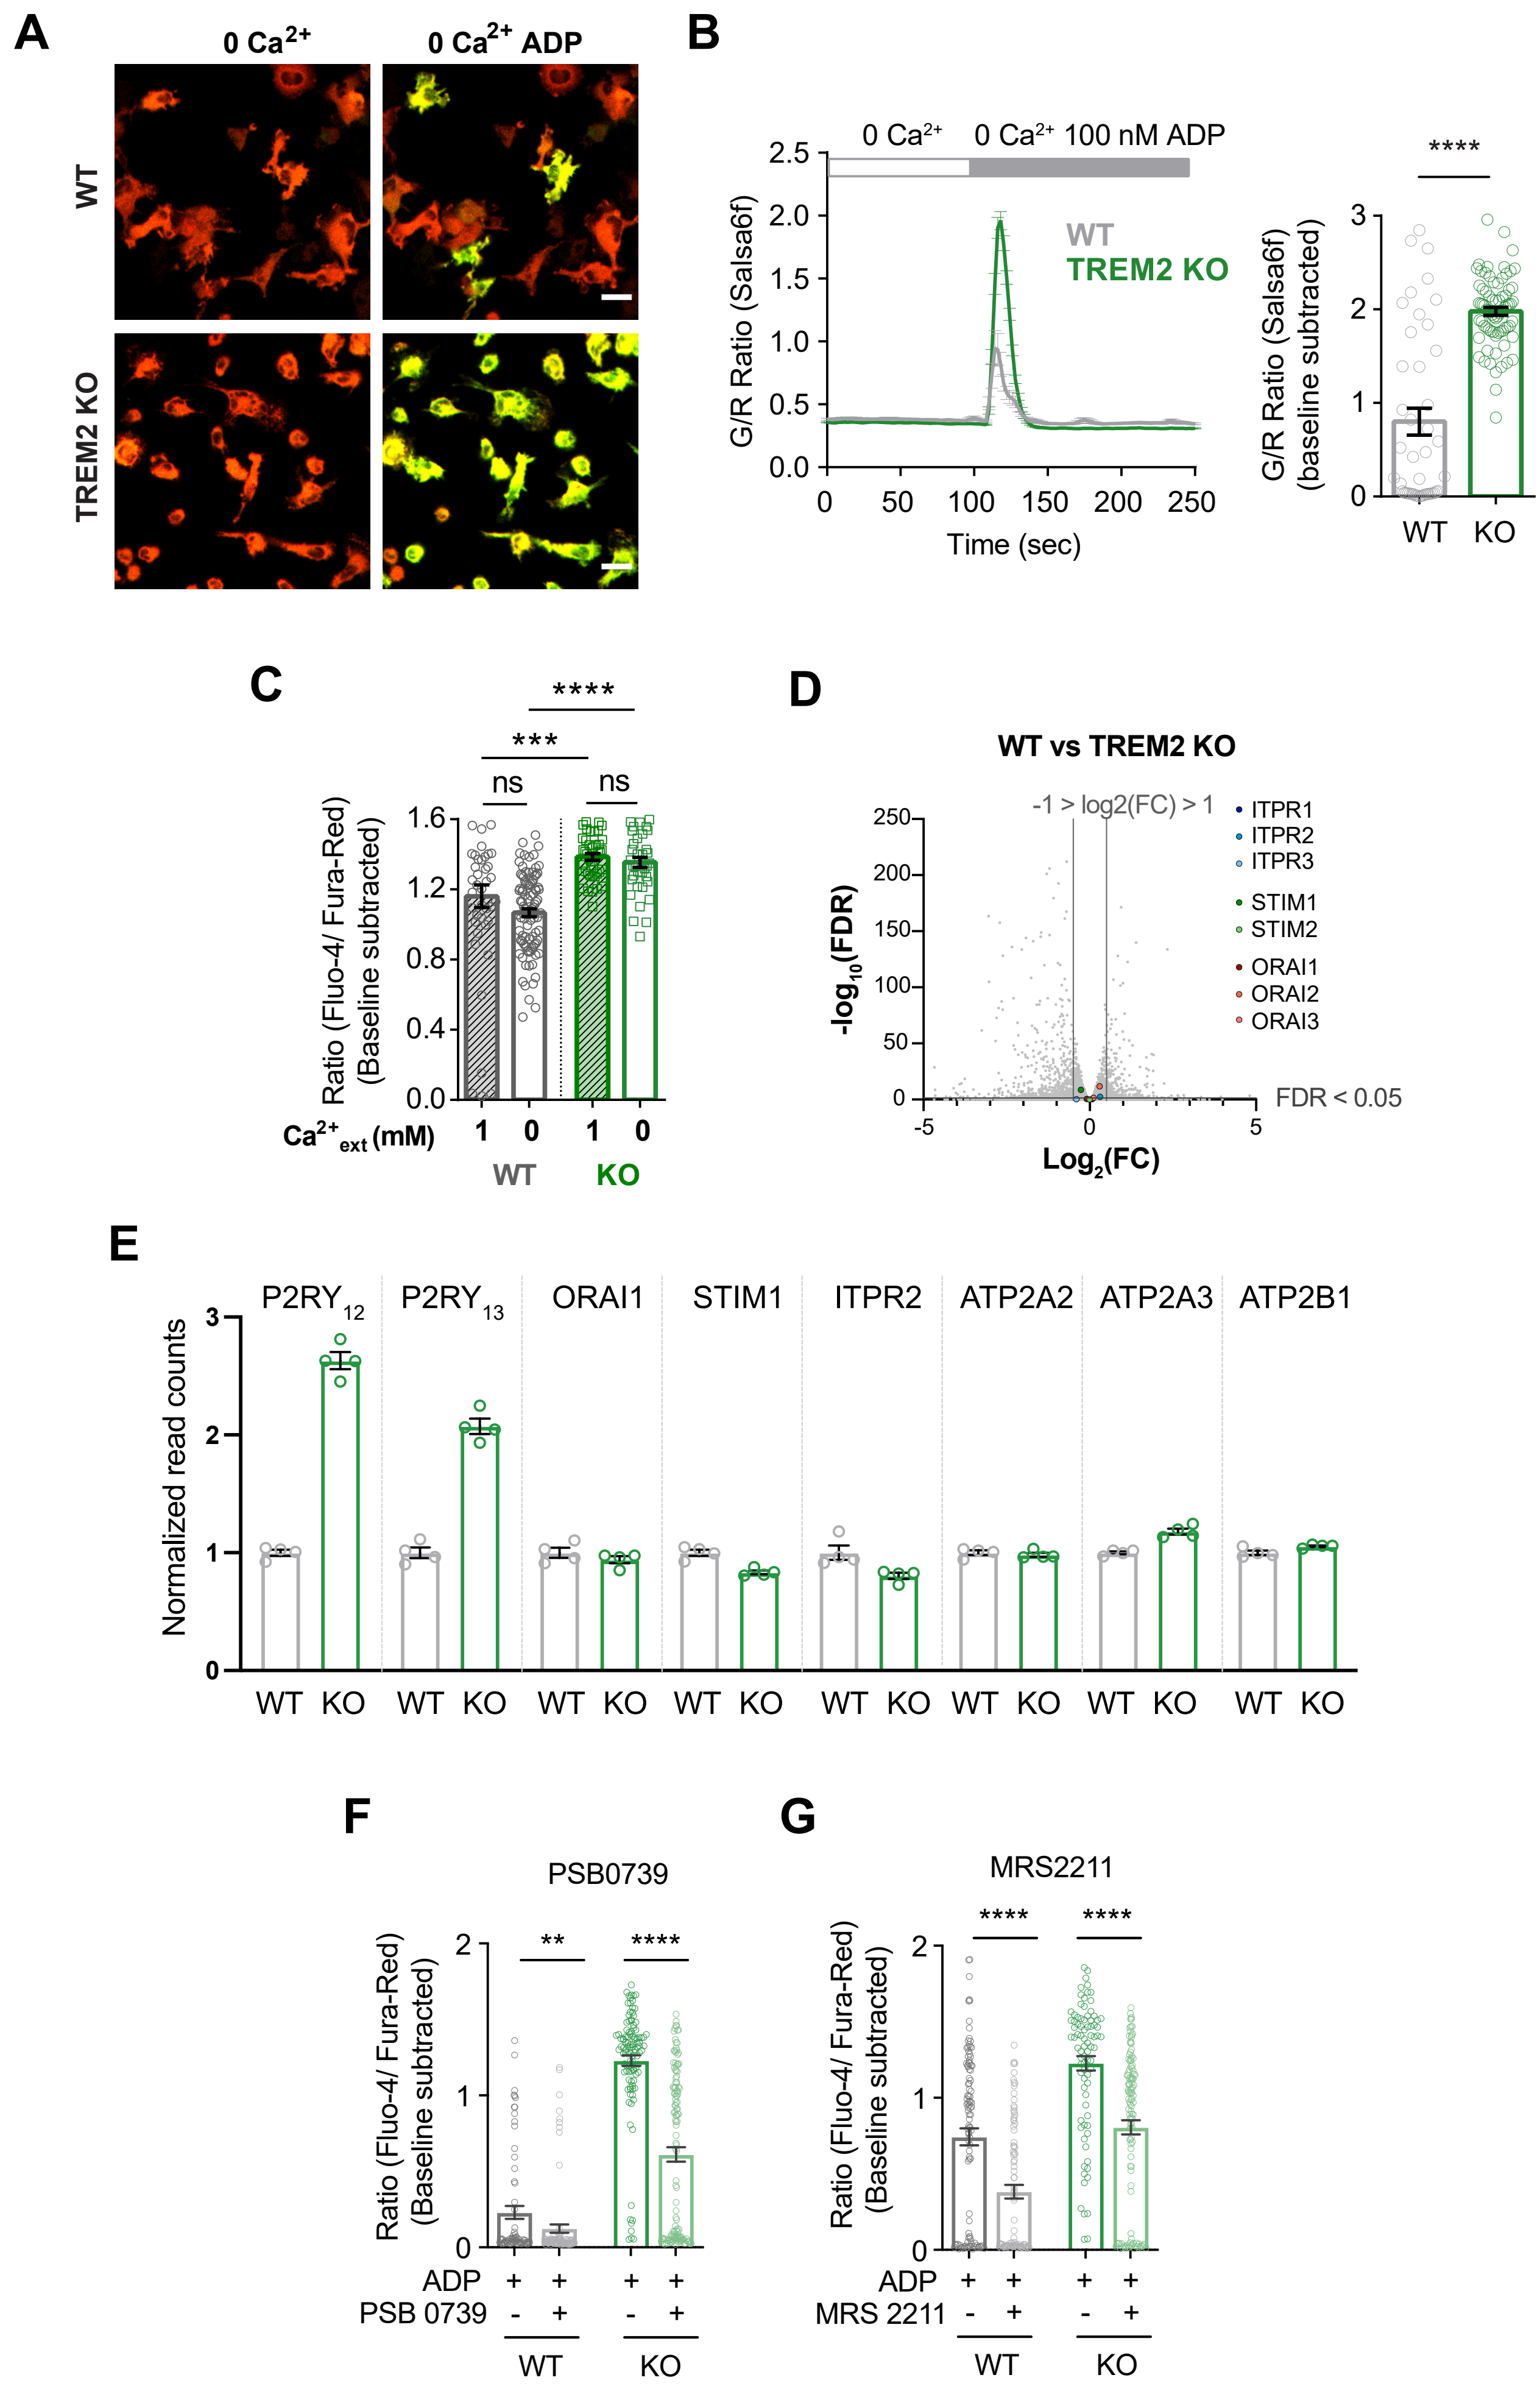

Supplement: supp [file elife-73021-supp-v1.zip]

**Figure 3-figure supplement 1**

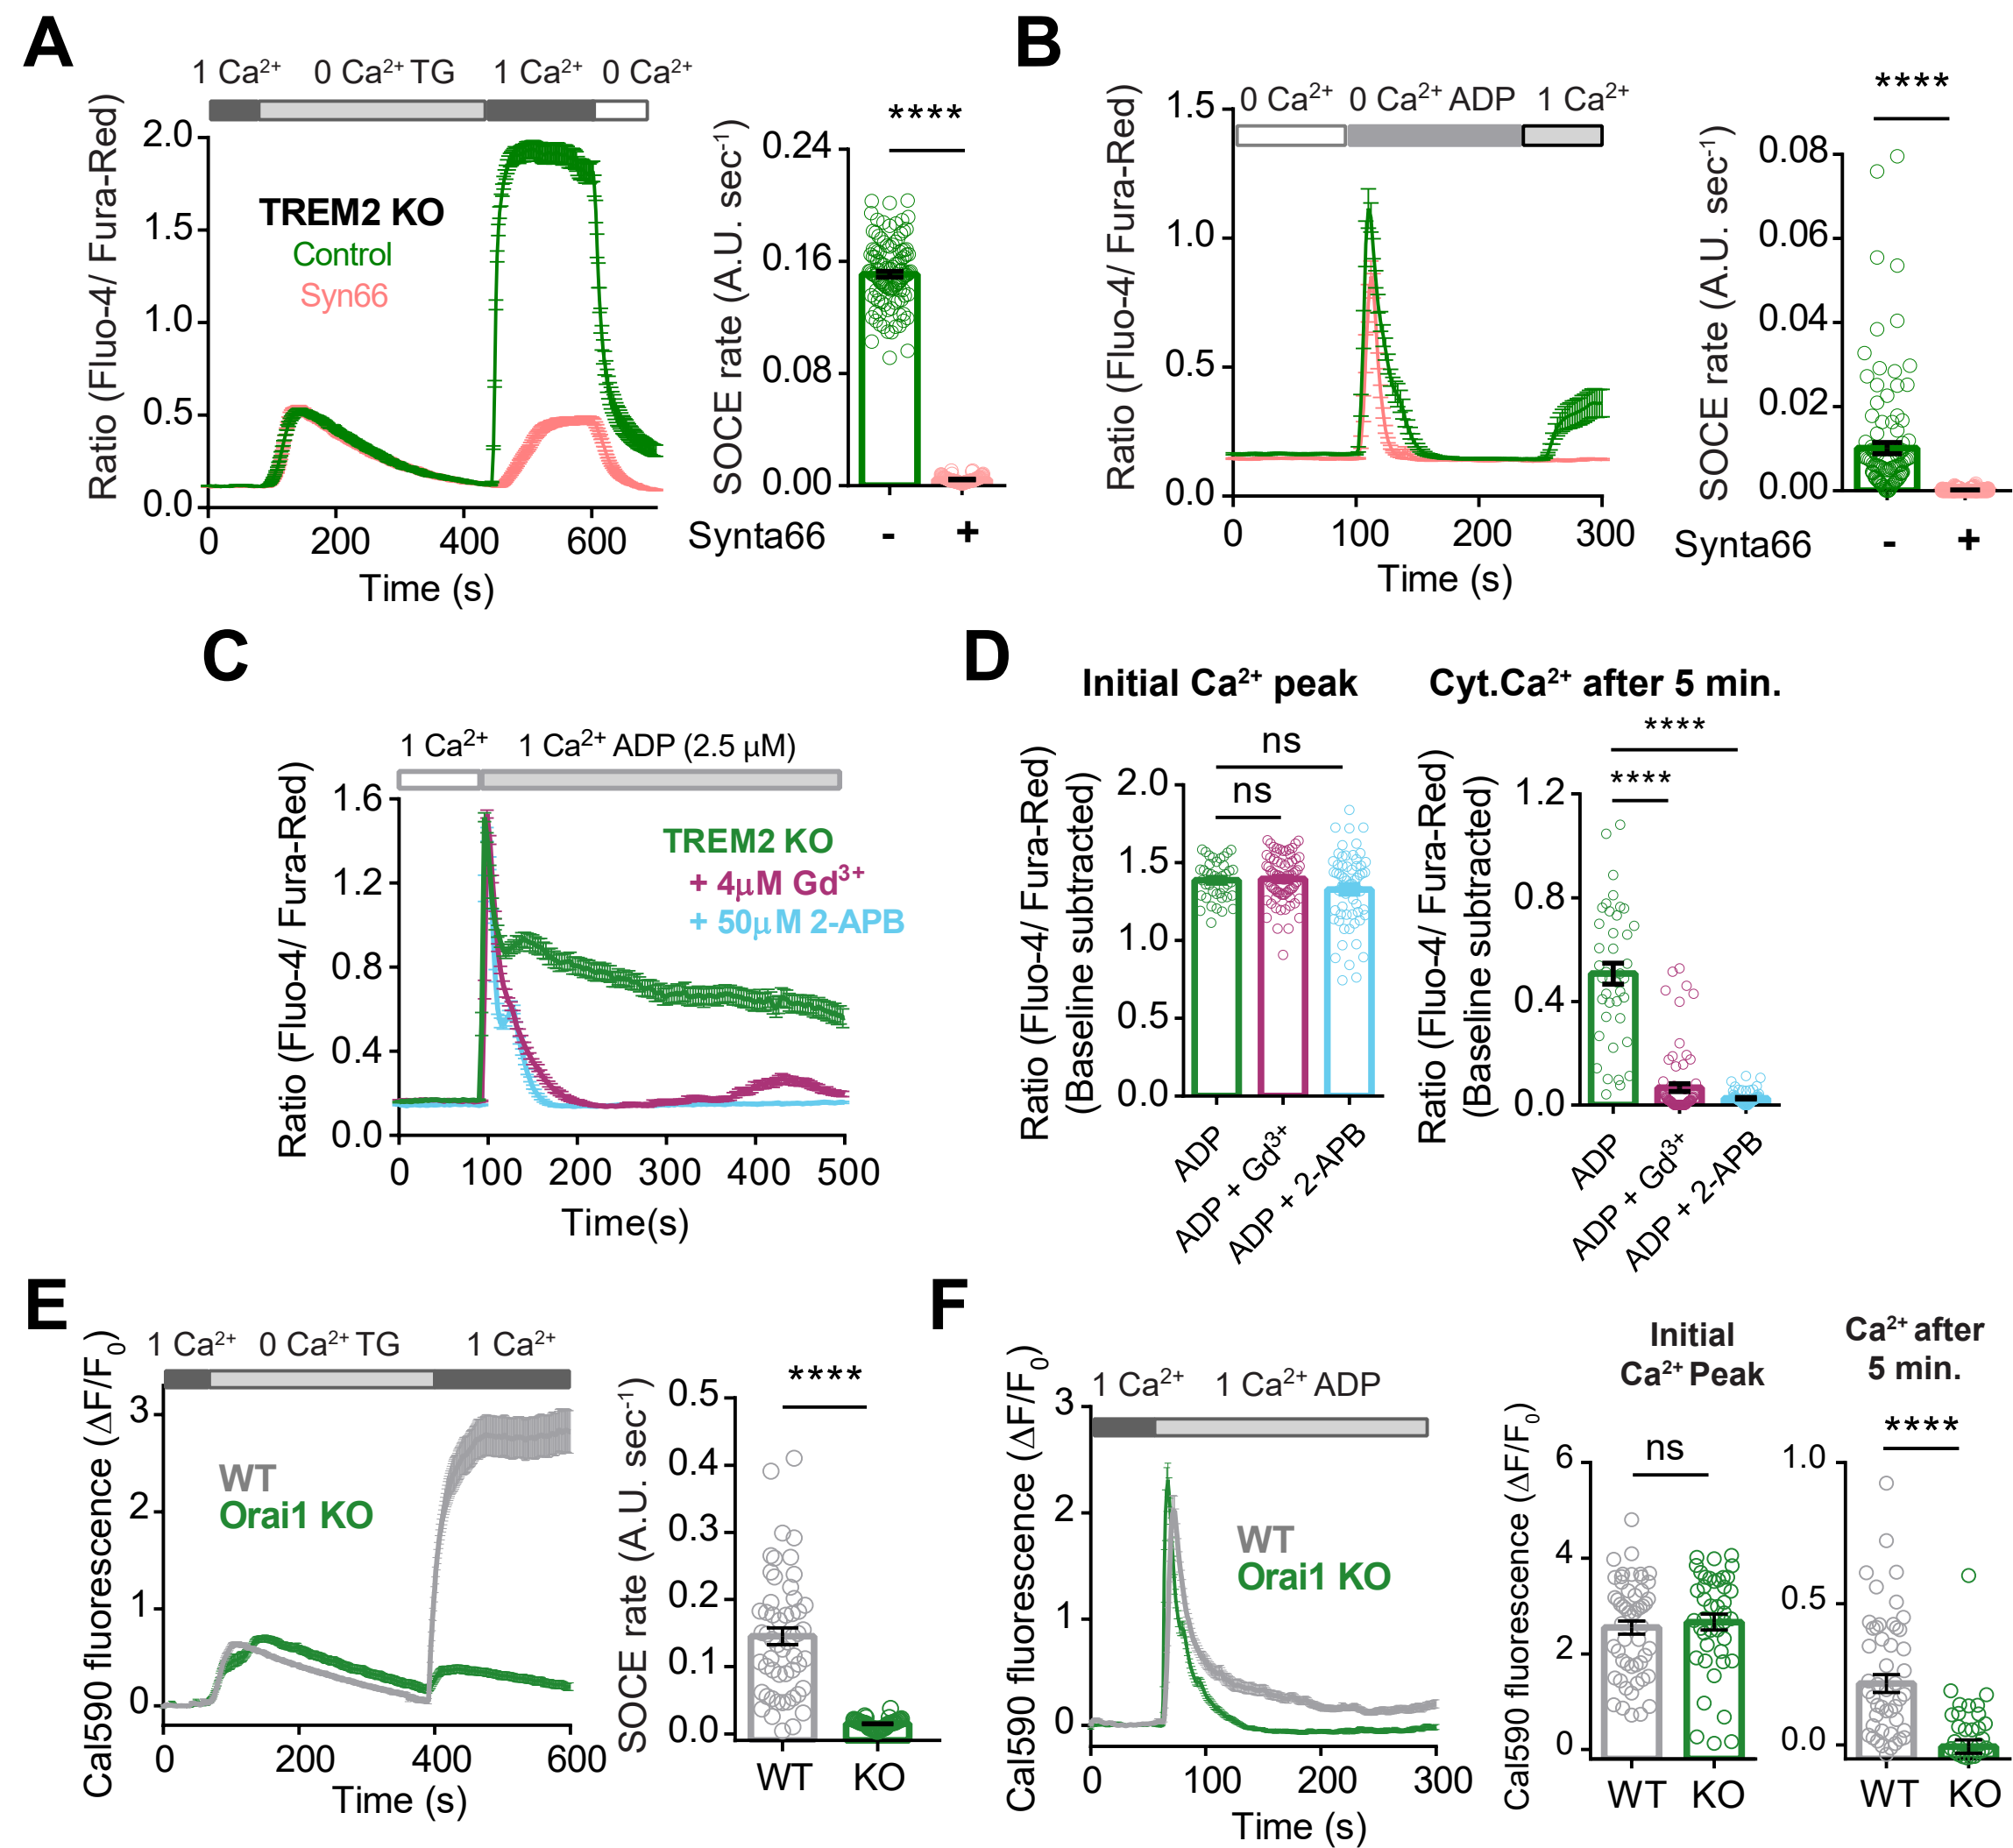

Supplement: supp [file elife-73021-supp-v1.zip]
